# Supplementary material for: Plasticity of Epigenomic and Transcriptomic Aging Reveals Common Targets for Reprogramming by Environmental Exposures
Source: Research Square preprint supplement (doi:10.21203/rs.3.rs-7368222/v1), 2025-09-19
Supplement: Supplementary file 1 [file 0f159cab6a148570c47e5fad.xlsx]

## Sheet: SuppTable11a
Supplemental Table 11a: GSEA for Risk and LAAsP comparisons (Figure 7f)
Gene Set Enrichment Analysis (GSEA) performed using MSigDB C8 Cell Type Aizarani Liver genesets (v7.5.1)
Values in Columns B–F are Normalized Enrichment Scores (NES)
GeneSets	M_liver_5mo_TBT.all.over.VEH NES	M_liver_5mo_HR.over.LR NES	M_liver_5mo_HR.over.VEH NES	M_liver_5mo_LR.over.VEH NES	M_liver_LAAsP_3wk_to_5mo NES	M_liver_5mo_TBT.all.over.VEH FDR q-value	M_liver_5mo_HR.over.LR FDR q-value	M_liver_5mo_HR.over.VEH FDR q-value	M_liver_5mo_LR.over.VEH FDR q-value	M_liver_LAAsP_3wk_to_5mo FDR q-value	M_liver_5mo_TBT.all.over.VEH core_genes	M_liver_5mo_HR.over.LR core_genes	M_liver_5mo_HR.over.VEH core_genes	M_liver_5mo_LR.over.VEH core_genes	M_liver_LAAsP_3wk_to_5mo core_genes
AIZARANI_LIVER_C14_HEPATOCYTES_2	-6.54843	-8.69349	-9.00012	2.11293	3.4061	0	0	0	0.00866011	0	A1BG;ACSM2;ADH4;AGXT;ALDH1L1;ALDH2;ALDH8A1;AMBP;APCS;APOA1;APOA2;APOA5;APOC1;APOC3;APOE;APOH;APOM;ARG1;ASGR1;ATF5;AZGP1;BAAT;BHMT;C3;C4BP;C8A;C8B;C9;CFHR1;CLU;CMBL;CP;CPN2;CPS1;CRP;CYP1A2;CYP27A1;CYP2D10;CYP2E1;CYP3A13;CYP4A32;CYP8B1;DCXR;EHHADH;F12;F2;FABP1;FAH;FBP1;FGA;FGB;FGG;FGL1;FTCD;FTL1-PS1;GADD45G;GC;GJB1;GLYAT;GRHPR;HAAO;HAMP;HGD;HMGCS2;HP;HPD;HPX;HRG;IGFBP1;ITIH1;ITIH3;KNG1;LBP;LDHA;LEA…	A1CF;ABAT;ACAA2;ACAT1;ACSM2;ACSM5;ACY1;ADH4;ADI1;AFM;AKR1D1;ALDH1L1;ALDH2;ALDH6A1;ALDH8A1;AMBP;ANGPTL3;APCS;APOA1;APOA2;APOC1;APOC3;APOC4;APOE;APOH;APOM;ASGR1;ASGR2;ATP5J;AZGP1;BAAT;BHMT;BHMT2;BNIP3;C2;C4BP;C8A;C8B;C9;CFB;CFHR1;CMBL;CPN2;CRP;CYB5A;CYP1A2;CYP27A1;CYP2D10;CYP2E1;CYP4A32;CYP8B1;DCXR;DPYS;ECHS1;F12;F2;F9;FABP1;FAH;FGA;FGB;FGG;FGL1;FTCD;FTL1-PS1;GAMT;GJB1;GLYAT;GRHPR;HAAO;HAO1;HAO2;HM…	A1BG;A1CF;ABAT;ACAA2;ACSM2;ACSM5;ACY1;ADH4;ADI1;AFM;AGXT;AKR1D1;ALDH1L1;ALDH2;ALDH4A1;ALDH6A1;ALDH8A1;AMBP;ANGPTL3;APCS;APOA1;APOA2;APOA5;APOC1;APOC3;APOC4;APOE;APOH;APOM;ASGR1;ASGR2;ATP5J;AZGP1;BAAT;BHMT;BHMT2;BNIP3;C2;C4BP;C8A;C8B;C9;CFHR1;CMBL;CPN2;CPS1;CRP;CYB5A;CYP1A2;CYP27A1;CYP2D10;CYP2E1;CYP3A13;CYP4A32;CYP8B1;DCXR;DPYS;ECHS1;F12;F2;F9;FABP1;FAH;FGA;FGB;FGG;FGL1;FTCD;FTL1-PS1;GAMT;GJB1;GL…	A1CF;ABAT;ACAA2;ACAT1;ACSM5;ACY1;ADH1;ADH4;ADI1;AFM;AKR1D1;ALDH6A1;ANGPTL3;APOA2;APOH;APOM;ASGR1;ASGR2;ATP5J;BAAT;BHMT2;BNIP3;CFB;CRYL1;CYB5A;CYP1A2;CYP27A1;CYP2D10;CYP2E1;CYP8B1;DCXR;DPYS;ECHS1;FABP1;FMO3;GAMT;GATM;GPX2;GSTP3;HAAO;HAO1;HAO2;HPN;HSD17B6;IGFBP4;INSIG1;LEAP2;LECT2;MLXIPL;MPC1;NIPSNAP1;PBLD2;PIPOX;PON1;PRAP1;PRG4;PTGR1;PTP4A1;RDH7;RGN;SERPINA6;SERPIND1;SHMT1;SLC10A1;SLC22A1;SLC27A5;…	A1CF;ABAT;ACSM5;ADH4;ALAS1;ALDH1A7;ALDH1L1;ALDH2;ALDH6A1;AMBP;ANGPTL3;APOA2;APOA5;APOB;APOC1;APOC3;ATP5J;AZGP1;BAAT;BHMT;C2;C4BP;C8A;C8B;C9;CFHR1;CLU;CMBL;CPN2;CRP;CRYL1;CYB5A;CYP27A1;CYP2D10;CYP3A13;CYP4A32;CYP8B1;EPHX1;F9;FABP1;FGB;FGG;FGL1;FTCD;GC;GLYAT;GPT2;GPX3;HAAO;HAMP;HGD;HMGCS2;HP;HPX;HRG;LRG1;MGST1;MLXIPL;NNMT;ORM2;PBLD2;PCK1;PHYH;PLIN2;PON3;QDPR;REEP6;RIDA;SAA4;SCP2;SDS;SELENBP2;SERPIN…
AIZARANI_LIVER_C11_HEPATOCYTES_1	-5.8873	-8.9601	-8.97164	2.80133	4.01467	0	0	0	0	0	A1BG;AADAC;ABCA1;ACADSB;ACSL1;ACSM2;ADH4;AGXT;ALDH1L1;ALDH2;ALDH7A1;ALDH8A1;AMBP;APCS;APOA1;APOA2;APOA5;APOC1;APOC3;APOC4;APOE;APOF;APOH;APOM;AQP9;ARG1;ASGR1;ASS1;ATF5;AZGP1;BAAT;BHMT;BHMT2;C2;C3;C4BP;C6;C8A;C8B;C9;CALD1;CAT;CFHR1;CFI;CLU;CMBL;CP;CPB2;CPN2;CPS1;CYP1A2;CYP27A1;CYP2E1;CYP3A13;CYP4A32;CYP4F14;CYP8B1;DCXR;EHHADH;ELL2;ERRFI1;F12;F2;F9;FABP1;FBP1;FGA;FGB;FGG;FGL1;FN1;FTCD;GADD45A;GADD4…	4931406C07RIK;A1CF;AADAC;ABAT;ABCA1;ACAA2;ACADSB;ACAT1;ACSL1;ACSM2;ACSM5;ADH4;ADI1;AFM;AGT;AGXT;AKR1D1;ALDH1L1;ALDH2;ALDH6A1;ALDH7A1;ALDH8A1;AMBP;ANGPTL3;APCS;APOA1;APOA2;APOC1;APOC3;APOC4;APOE;APOF;APOH;APOM;AQP9;AR;ASGR1;ASGR2;ATP5J;AZGP1;BAAT;BHMT;BHMT2;BNIP3;C2;C4BP;C6;C8A;C8B;C9;CAT;CDO1;CFB;CFHR1;CMBL;CPB2;CPN2;CYB5A;CYP1A2;CYP27A1;CYP2E1;CYP4A32;CYP4F14;CYP8B1;DCXR;DHTKD1;DPYS;ECHDC2;ECHS1…	4931406C07RIK;A1BG;A1CF;AADAC;ABAT;ABCA1;ACAA2;ACADSB;ACAT1;ACSL1;ACSM2;ACSM5;ADH4;ADI1;AFM;AGT;AGXT;AKR1D1;ALDH1L1;ALDH2;ALDH6A1;ALDH7A1;ALDH8A1;AMBP;ANGPTL3;APCS;APOA1;APOA2;APOA5;APOC1;APOC3;APOC4;APOE;APOF;APOH;APOM;AQP9;ASGR1;ASGR2;ATP5J;AZGP1;BAAT;BHMT;BHMT2;BNIP3;C2;C3;C4BP;C6;C8A;C8B;C9;CAT;CDO1;CFB;CFHR1;CFI;CMBL;CPB2;CPN2;CPS1;CYB5A;CYP1A2;CYP27A1;CYP2E1;CYP3A13;CYP4A32;CYP4F14;CYP8B1;D…	A1CF;AADAC;ABAT;ACAA2;ACAT1;ACSM5;ADH1;ADH4;ADI1;AFM;AGT;AKR1D1;ALB;ALDH2;ALDH6A1;ANGPTL3;APOA2;APOH;APOM;AQP9;AR;ASGR1;ASGR2;ATP5J;BAAT;BCHE;BHMT2;BNIP3;CDO1;CES2G;CFB;CFL2;COBLL1;CYB5A;CYP1A2;CYP27A1;CYP2E1;CYP4F14;CYP8B1;DCXR;DHTKD1;DPYS;ECHDC2;ECHS1;ENPP1;FABP1;FMO3;GATM;GGH;GHR;GLUD1;GLYAT;GRHPR;GSTP3;GYS2;HAAO;HAO1;HAO2;HLF;HMGCS2;HPGD;HPN;HSD11B1;HSD17B6;IDH1;IGFBP2;IL1RAP;INSIG1;KLF15;KLK…	A1CF;AADAC;ABAT;ABCA1;ACADSB;ACSL1;ACSM5;ADH4;ADI1;ALAS1;ALDH1A7;ALDH1L1;ALDH2;ALDH6A1;ALDH7A1;AMBP;ANGPTL3;AOX1;APOA2;APOA5;APOB;APOC1;APOC3;AQP9;AR;ATP5J;AZGP1;BAAT;BHMT;C2;C4BP;C6;C8A;C8B;C9;CAT;CFHR1;CLU;CMBL;COBLL1;CPB2;CPN2;CYB5A;CYP27A1;CYP3A13;CYP4A32;CYP8B1;DECR1;ECHDC2;ELL2;EPHX1;ERRFI1;F9;FABP1;FGB;FGG;FGL1;FMO5;FTCD;GC;GHR;GLYAT;GNMT;GPT2;GYS2;HAAO;HAMP;HC;HGD;HMGCS2;HP;HPX;HRG;IDH1;I…
AIZARANI_LIVER_C17_HEPATOCYTES_3	-6.04186	-5.47146	-6.333	-1.94612	2.468	0	0	0	0.0118768	0.000502941	A1BG;ABCA1;ACSL1;ACSM2;ADH4;AGXT;AMBP;APOA1;APOA2;APOA5;APOC1;APOC3;APOE;APOH;ASGR1;AZGP1;BAAT;C3;C9;CLU;CP;CPS1;CRP;CYP1A2;CYP2E1;CYP3A13;CYP8B1;DCXR;F12;F2;FGA;FGB;FGG;FGL1;FN1;FTCD;HC;HP;HPX;HRG;IGFBP1;ITIH1;ITIH3;KNG1;LRG1;MAT1A;MLXIPL;MST1;NNMT;ORM2;PLG;PLIN5;RARRES2;RBP4;SELENBP2;SERPINA1E;SERPINA3N;SERPINF1;SERPINF2;SERPING1;SLC27A5;SULT2A7;TMEM176A;VTN	ACSL1;ACSM2;ADH4;AFM;AGXT;AMBP;APOA1;APOA2;APOC1;APOC3;APOE;APOH;ASGR1;ASGR2;AZGP1;BAAT;C9;CFB;CRP;CYP1A2;CYP2E1;CYP8B1;DCXR;F12;F2;FGA;FGB;FGG;FGL1;FN1;FTCD;HP;HPN;HRG;ITIH1;ITIH3;KNG1;LRG1;MAT1A;MLXIPL;MST1;ORM2;PLG;RBP4;SELENBP2;SERPINA1E;SERPINA3N;SERPINC1;SERPINF1;SERPINF2;SERPING1;SLC27A5;SULT2A7;VTN	A1BG;ABCA1;ACSL1;ACSM2;ADH4;AFM;AGXT;AMBP;APOA1;APOA2;APOA5;APOC1;APOC3;APOE;APOH;ASGR1;ASGR2;AZGP1;BAAT;C9;CPS1;CRP;CYP1A2;CYP2E1;CYP3A13;CYP8B1;DCXR;F12;F2;FGA;FGB;FGG;FGL1;FN1;FTCD;HC;HP;HPN;HPX;HRG;ITIH1;ITIH3;KNG1;LRG1;MAT1A;MLXIPL;MST1;NNMT;ORM2;PLG;RBP4;SELENBP2;SERPINA1E;SERPINA3N;SERPINC1;SERPINF1;SERPINF2;SERPING1;SLC27A5;SULT2A7;VTN	A1BG;AMBP;APOA5;C3;C9;CLU;CP;CPS1;CYP2A4;CYP3A13;CYP4F18;FGA;FGB;FGG;FGL1;HC;HP;HPX;IGFBP1;ITIH3;LRG1;NNMT;ORM2;PLIN5;SELENBP2;SERPINA1E;SERPINA3N;SERPING1;TMEM176A;TMEM176B	ACSL1;ADH4;APOA2;APOA5;APOB;AZGP1;BAAT;C9;CLU;CRP;CYP3A13;CYP8B1;EPHX1;FGB;FGL1;FTCD;GPT2;HC;HP;HPX;LRG1;NNMT;ORM2;SELENBP2;SERPINA1E;SERPING1;SULT2A7
AIZARANI_LIVER_C30_HEPATOCYTES_4	-2.75426	-3.93496	-4.56803	0	2.54988	0.000273775	0	0	0	0.000435294	5730455P16RIK;AASS;ABCA1;ACACB;ACAD11;ACSL1;ACSM2;ADCY1;AGXT;AHI1;AIG1;AK3;ALDH1L1;ANGPTL4;ARG1;ARHGEF10L;ARL10;ARMC9;ASGR1;ASPG;BAAT;BHMT;C5AR2;C6;C8A;CAMK1D;CCDC30;CHRD;CP;CPEB4;CPS1;CRP;CYP2D10;CYP3A13;EFNA1;EPHX2;F12;F7;FBXO17;FBXO31;FST;FTCD;GADD45G;GCGR;GFOD2;GMEB1;GNE;GRB14;GRTP1;GTF2H2;H6PD;HAL;HAP1;HC;HDHD3;HELB;HGD;HPX;ID2;IGFBP1;IL1RAP;ITIH1;ITIH3;LEAP2;LMOD3;LONP2;LRP6;LYRM7;MAST4;MAT…	0610030E20RIK;A1CF;ABCA1;ABCA6;ABCC2;ABHD15;ACACB;ACAD11;ACADVL;ACSL1;ACSM2;ACSM5;ADGRA3;AFM;AGXT;AK3;ALDH1L1;ANGPTL4;AR;ARHGEF10L;ARHGEF26;ASGR1;ASPG;BAAT;BCL6;BCO2;BHMT;BHMT2;BIVM;C6;C8A;CAMK1D;CAR5A;CCDC30;CCNL2;CCT8;CHRD;CLMN;COL18A1;COL27A1;COLEC12;COMMD2;CPEB4;CRP;CYP2D10;DCPS;DESI1;DHTKD1;DNAJA1;DNAJC22;ECHDC2;EFNA1;EMC10;EPHX2;ERBB3;F12;F5;F7;FBXO21;FBXO22;FBXO31;FKBP5;FTCD;GCGR;GCKR;GFOD…	0610030E20RIK;5730455P16RIK;A1CF;AASS;ABCA1;ABCA6;ABHD15;ACACB;ACAD11;ACADVL;ACSL1;ACSM2;ACSM5;ADCY1;ADGRA3;AFM;AGXT;AK3;ALDH1L1;ANGPTL4;ARG1;ARHGEF10L;ARHGEF26;ASGR1;ASPG;BAAT;BCL6;BCO2;BHMT;BHMT2;C5AR2;C6;C8A;CAMK1D;CAR5A;CCDC30;CHRD;COL18A1;COL27A1;COLEC12;COMMD2;CPEB4;CPS1;CRP;CYP2D10;CYP3A13;DCPS;DESI1;DHTKD1;DNAJA1;DNAJC22;ECHDC2;EFNA1;EMC10;EPHX2;ERBB3;ERRFI1;F12;F7;FBXO21;FBXO22;FBXO31;FT…		A1CF;ABCC3;ABLIM3;ACACB;ACAD11;ACSL1;ADGRA3;AHI1;AK3;ALAS1;ANGPTL4;AR;ARHGEF26;ASPG;BAAT;BCL6;BHMT;C6;C8A;CAMK1D;CHDH;CHORDC1;CLMN;COL27A1;COLEC12;CRP;CSAD;CYP2D10;CYP3A13;DNAJA1;DST;ELL2;EPHX2;ERRFI1;FMN1;FMO5;FOXO3;FTCD;FYB2;GCGR;GFOD2;GLYCTK;GPT2;H6PD;HC;HPX;HSPA4L;ID2;LONP2;LRP6;LRRC58;MAP3K14;MFSD4B1;MKNK2;MPV17L;NLRP12;NOS1AP;ONECUT2;PCK1;PLIN4;PTPN3;SDS;SEC23A;SELENBP2;SLC17A9;SLC27A2;SLC3…
AIZARANI_LIVER_C31_KUPFFER_CELLS_5	-1.34312	1.24847	-1.47794	-1.95756	0	0.189804	0.188429	0.10285	0.0119206	0	ACSM2;ARHGEF10L;ASPG;C5AR1;CHRD;CRP;CYP3A13;DISP2;EFNA1;FST;H6PD;IRAK3;ITIH3;LONP2;LRRFIP1;LST1;MFSD4B1;MLXIPL;NLRP12;PLIN5;POU2F2;RNF144B;SH3BP2;SHROOM1;SLC13A5;STAT3;STK19	ACOT9;AIF1;BAZ1A;C5AR1;CALD1;CCDC88A;COTL1;CTSS;CYBB;CYP2A4;CYP4F18;FCER1G;FGR;FST;GADD45B;GPT2;IL1RN;ITGAX;KCNAB2;LRRFIP1;LST1;MDM2;MEGF9;MS4A7;MYH11;NAMPT;NKTR;NTRK3;PLAUR;PLIN5;POU2F2;PSAP;RBM25;REL;RGS2;ROCK1;S100A11;SAMD5;SAT1;SLC11A1;SLC43A2;TYROBP;VCAN;ZC3H13;ZEB2;ZMAT3	ACADVL;ACSM2;ARHGEF10L;ASPG;CD300E;CHRD;CRP;CYP3A13;DISP2;EFNA1;H6PD;IL6RA;ITIH3;LONP2;MARCO;MFSD4B1;MLXIPL;MPV17L;MST1;NLRP12;PTK2B;RNF144B;SELENOO;SH3BP2;SHROOM1;SLC13A5;STAT3;STK19;TENT5A;TLCD2;ZKSCAN1	ACOT9;ACSM2;ADAP2;AIF1;ARHGEF10L;ASPG;BAZ1A;C5AR1;CALD1;CCDC88A;CD300E;CHRD;CTSB;CTSS;CYBB;CYP2A4;CYP3A13;CYP4F18;DISP2;EFNA1;FCER1G;FCGR4;FGR;FST;GADD45B;GGPS1;GPT2;H6PD;IL1RN;IRAK3;ITGAX;ITIH3;KCNAB2;LONP2;LRRFIP1;LST1;LUC7L3;LYN;MDM2;METTL21A;MS4A7;NLRP12;NSUN6;NTRK3;PAG1;PHF8;PLAUR;PLIN5;POU2F2;PSAP;RBM25;REL;RGS2;RNF144B;ROCK1;S100A11;SAMD5;SAT1;SH3BP2;SHROOM1;SLC11A1;SLC13A5;STAT3;STK19;TCF…
AIZARANI_LIVER_C22_RESIDENT_B_CELLS_2	0	0	0	0	0	0	0	0	0	0
AIZARANI_LIVER_C38_RESIDENT_B_CELLS_3	1.48318	0	0	0	0	0.0780561	0	0	0	0	CD27;CD79A;FKBP11;HERPUD1;ITM2C;JCHAIN;LY9;PELI1;POU2AF1;SLAMF7;TENT5C
AIZARANI_LIVER_C12_NK_NKT_CELLS_4	1.38201	2.23269	2.29255	-1.23114	1.81084	0.116096	0.000561013	0.000577999	0.226469	0.032114	BAG3;CACYBP;CD247;CD7;DNAJB1;DUSP2;GZMA;HSPH1;KLRD1;KLRK1;NKG7;PTPRC;RUNX3;TXNIP;WIPF1	ALOX5AP;BTG2;CD247;CD3E;CD7;DUSP2;GZMA;IKZF3;IL2RB;ITGAL;KLRD1;KLRK1;LCP1;NKG7;PTPRC;RAC2;RUNX3;TXNIP;WIPF1	ALOX5AP;BAG3;BTG2;CD247;CD3E;CD69;CD7;DUSP2;GZMA;IKZF3;IL2RB;ITGAL;KLRD1;KLRK1;LCP1;NKG7;PTPRC;RAC2;RUNX3;TXNIP;WIPF1	ALOX5AP;BTG2;DNAJA4;GM36028;HSP90AA1;IKZF3;IL2RB;ITGAL;KLRK1;PTPRC;RAC2;WIPF1	BAG3;CACYBP;CMC1;DNAJA1;DNAJA4;DNAJB1;GM36028;HSP90AA1;HSPH1;LCP1
AIZARANI_LIVER_C13_LSECS_2	3.38886	2.57558	2.64169	2.71321	-5.59866	0	8.39161e-05	0	0	0	A2M;ACTN1;ADD3;ADGRL4;ADM;AFF1;AKAP12;ANPEP;APLNR;APP;ARAP3;ASAP1;BTNL9;CALCRL;CAVIN1;CAVIN2;CD14;CD36;CD93;CDH5;CLDN5;CLEC14A;CLEC1B;CNN3;COL4A1;COL4A2;COL6A2;CPNE2;CXCL16;DAAM1;DAB2;DENND4C;DLC1;DUSP5;EDNRB;EFNB2;EGFL7;ELK3;EMCN;ENG;EPHB4;ERG;ESAM;F8;FAM107A;FAM167B;FCGR3;FLNB;FLT1;FLT4;FSCN1;FXYD6;FZD4;GIMAP8;GJA4;GNG11;HDAC7;HECW2;HEG1;HIPK2;IGFBP7;KLF4;KLF7;LAMB2;LAPTM4B;LDB2;LGMN;LPAR6;LYVE…	ACTN1;ADAMTS4;ADD3;ADM;AKAP12;ALPL;APLNR;APP;ARHGEF7;ASAP1;BST2;CAVIN1;CD14;CD36;CD93;COL4A1;COL4A2;COL6A2;CXCL16;DLL1;DUSP5;EDN1;EDNRB;EFNB2;ELK3;ENG;FAM107A;FCGR3;FGFR1;FLNB;FLT1;FLT4;FSCN1;FXYD6;GALNT15;GAS2L1;GIMAP8;GM13889;HDAC7;HEG1;HES1;ID1;ID3;IFITM10;IGFBP7;IL33;KLF7;LAMB2;LAPTM4B;LDB2;LGMN;LIMCH1;LYVE1;MAN1C1;MAP3K6;MARCKS;MARCKSL1;MID1;MS4A6D;MYO10;MYO1C;NEDD9;NID1;NOVA2;NPDC1;NR2F1;NU…	A2M;ACTN1;ADAMTS4;ADD3;ADM;AKAP12;ALPL;APLNR;APP;ASAP1;BST2;BTNL9;CAVIN1;CAVIN2;CD14;CD36;CD93;COL4A1;COL4A2;COL6A2;CXCL16;DLL1;DUSP5;EDN1;EDNRB;EFNB2;ELK3;EMCN;ENG;EPHB4;ESAM;FAM107A;FCGR3;FGFR1;FLNB;FLT1;FLT4;FSCN1;FXYD6;GALNT15;GIMAP8;GM13889;GNG11;HDAC7;HEG1;IGFBP7;KLF4;KLF7;LAMB2;LAPTM4B;LDB2;LGMN;LIMCH1;LYVE1;MAN1C1;MARCKS;MARCKSL1;MS4A6D;MYO10;MYO1C;NEDD9;NID1;NOVA2;NPDC1;NPL;NXPE3;PALM;PC…	A2M;ACTN1;ADD3;ADGRF5;ADGRL4;AKAP12;ANPEP;ARAP3;ATP13A3;BTNL9;CALCRL;CAVIN2;CD14;CD36;CD59A;CD93;CDC42EP4;CDH5;CFP;CLDN5;CLEC14A;CLEC1B;CLEC4G;CNN3;CPNE2;DAAM1;DENND4C;DLC1;DNASE1L3;ECE1;EDNRB;EGFL7;EHD3;EMCN;EPHB4;ERG;ESAM;EXOC3L2;F8;FAM107A;FAM167B;FCGRT;FILIP1;FLT4;FZD4;GIMAP8;GNG11;HECW2;HEG1;HIPK2;IGFBP4;INSR;KDR;KLF2;KLF4;LDB2;LIFR;LPAR6;LYVE1;MAF;MARCKS;MARCKSL1;MEIS2;MMRN2;MRC1;MYCT1;NFIB…	ACTN1;ADD3;ADGRF5;ADGRL4;ADM;AKAP12;APOLD1;APP;ARAP3;ARHGEF7;BTNL9;C1QTNF1;CALCRL;CALU;CAVIN1;CAVIN2;CD93;CDH5;CFP;CLDN5;CLEC14A;CLEC4G;CNN3;COL4A1;COL4A2;COL6A2;CPNE2;DAB2;DLC1;DLL1;DNASE1L3;DUSP5;EDNRB;EFNB2;EGFL7;EHD3;ELK3;EMCN;ENG;EPHB4;EPOR;ERG;ESAM;EXOC3L2;FAM167B;FCGR3;FILIP1;FLT1;FLT4;FSCN1;FXYD6;GATA4;GIMAP8;GJA4;GM13889;GNG11;GPR182;HDAC7;HECW2;HEG1;HES1;IGFBP7;IL33;KDR;KLF2;KLF4;KLF7;L…
AIZARANI_LIVER_C32_MVECS_3	1.8348	2.96846	2.79303	-1.7607	-2.87935	0.0161974	0	0	0.0299447	0	ACTN1;ADGRG6;AKAP12;APP;BHLHE40;CXCL9;DPYSL2;EPHB4;FBLN2;FKBP1A;GIMAP4;GPM6A;HDAC7;HEG1;IGFBP7;INMT;KLF4;MAPK7;MATN2;MMRN2;NCOA7;NDRG1;NR2F2;PECAM1;PRCP;PTGIS;PTGS1;SLC38A2;SPRY1;SPTBN1;SRPX;TAL1;TFPI;TGFBR3;THBD;TIAM1;TIMP3;TLR4;TMSB10;TNFSF10;VCAM1;VWF;WWTR1	ACKR3;ACTN1;ADGRG6;AKAP12;APP;ARL4A;BST2;C7;CEBPD;CRIM1;CXCL9;DPYSL2;EHD4;ENG;EPHB4;FBLN2;FCGR3;FGFR1;FKBP1A;GIMAP4;GM13889;GPM6A;HDAC7;HEG1;ID1;IGFBP7;IL33;IRAK3;KRAS;MAPK7;MATN2;NCOA7;NDRG1;NFKBIZ;NOVA2;NPDC1;NTN4;PARP14;PDLIM1;PPFIBP1;PRCP;PRSS23;PTGIS;SGK1;SMAD6;SNTB2;SOX7;SPRY1;SPTBN1;SRPX;TAL1;TFPI;TGFBR3;TGM2;THBD;TIAM1;TIMP3;TLR4;TMSB10;TNS1;VCAM1;VWF;WWTR1;ZMYND8	ACKR3;ACTN1;ADGRG6;AKAP12;APP;BST2;C7;CEBPD;CRIM1;CXCL9;DPYSL2;EHD4;ENG;EPHB4;FBLN2;FCGR3;FGFR1;FKBP1A;FSTL3;GIMAP4;GM13889;GPM6A;HDAC7;HEG1;IGFBP7;KLF4;MAPK7;MATN2;NCOA7;NDRG1;NOVA2;NPDC1;PPFIBP1;PRCP;PRSS23;PTGIS;SGK1;SMAD6;SNTB2;SPRY1;SPTBN1;SRPX;TAL1;TFPI;TGFBR3;TGM2;THBD;TIAM1;TIMP3;TLR4;TMSB10;TNS1;VCAM1;VWF;WWTR1	ACKR3;ADGRG6;APOL11B;APOLD1;ARL4A;B2M;BST2;C7;CEBPD;CSRNP1;EHD4;FBLN2;FGFR1;GM13889;HSPB8;HYAL2;ID1;IL1R1;IL33;IL6ST;IRAK3;MAPK7;NFKBIZ;NOVA2;NPDC1;NTN4;PARP14;PDLIM1;PPFIBP1;PRSS23;PTGDS;PTGIS;SGK1;SMAD6;SOCS3;SOX7;TGM2;TIMP3;TNS1;VWF;ZMYND8	ACKR3;ACTN1;AKAP12;APOLD1;APP;CALCRL;EHD4;EPHB4;FBLN2;FCGR3;GIMAP4;GM13889;HDAC7;HEG1;IGFBP7;IL33;INMT;KLF2;KLF4;MAPK7;MATN2;MMRN2;NCOA7;NDRG1;PECAM1;PRCP;PTGS1;SGK1;SOX7;SPRY1;SPRY4;TAL1;TFPI;TGFBR3;THBD;TLR4;TMSB10;VCAM1;VWF
AIZARANI_LIVER_C4_EPCAM_POS_BILE_DUCT_CELLS_1	2.79828	2.88204	2.80818	1.94533	0	0	0	0	0.0163503	0	ABCC3;ALCAM;ALDH3A2;AMOTL2;ANXA4;ANXA5;ARRDC2;ATF3;ATP1A1;ATP1B1;BACE2;BEX3;BICC1;C77080;CALM2;CAMK2N1;CAR2;CAV2;CCDC198;CDC42EP1;CDKN1C;CHST4;CKB;CLDN7;CLIC6;CLMN;CPD;CPM;CRYAB;CTDSPL;CXADR;DCDC2A;DHCR24;DSP;DSTN;ELF3;EMP2;ENPP2;EPCAM;ERICH5;FAM171A1;FGFR3;GLIS3;GOLM1;GTF2I;HSD17B11;IRF2BP2;ITGB5;ITGB8;KANK2;KIF12;KLF10;LAMC1;LGALS4;MAOA;MYLK;MYO10;MYRF;NFIB;NFIC;NR2F2;PERP;PHGDH;PKHD1;PMEPA1;PT…	ALCAM;ALDH3A2;ANXA4;ANXA5;ATF3;ATP1B1;BAMBI;BEX3;BICC1;CAR2;CAV2;CCDC198;CDC42EP1;CDH1;CITED4;CKB;CLDN7;CLIC6;CPM;CRYAB;CTDSPL;CXADR;DCDC2A;DSP;EGR1;ELF3;EMP2;EPCAM;ERICH5;FGFR2;FGFR3;FMO5;GDF15;GLIS3;GOLM1;IRF2BP2;ITGB5;ITGB8;KIF12;KRT18;KRT7;KRT8;LAD1;LAMC1;MARVELD3;MYO10;MYRF;NEDD4L;PAWR;PHGDH;PKHD1;PLPP2;PMEPA1;PRRG4;RAP1GAP;RBPMS;RHOB;SDC1;SHANK2;SHROOM3;SLPI;SOD3;SORBS2;SOX4;SOX9;SPATS2L;SP…	ABCC3;ALCAM;ALDH3A2;ANXA4;ANXA5;ATF3;ATP1B1;BACE2;BAMBI;BEX3;BICC1;CALM2;CAR2;CAV2;CCDC198;CDC42EP1;CDH1;CDKN1C;CITED4;CKB;CLDN7;CLIC6;CPD;CPM;CRYAB;CTDSPL;CXADR;DCDC2A;DHCR24;DSP;EGR1;ELF3;EMP2;ENPP2;EPCAM;ERICH5;FGFR2;FGFR3;FMO5;GDF15;GLIS3;GOLM1;IRF2BP2;ITGB5;ITGB8;KANK2;KIF12;KRT18;KRT7;KRT8;LAMC1;MAOA;MYO10;MYRF;PAWR;PHGDH;PKHD1;PLPP2;PMEPA1;PRRG4;RAP1GAP;RBPMS;RHOB;SHANK2;SHROOM3;SLC5A1;SLP…	2310022B05RIK;ABCC3;AGT;ALDH3A2;AMOTL2;ANPEP;ANXA4;AQP1;ARRDC2;ATP1A1;ATP1B1;BACE2;C77080;CALM2;CAMK2N1;CAR2;CAV2;CD59A;CDH2;CDKN1C;CKB;CLDN7;CLMN;COL27A1;CRYAB;CRYZ;CTDSPL;CTSH;DHCR24;DSP;DSTN;ELF3;ENPP2;EPCAM;ERBB3;GLUL;GTF2I;HNMT;HOMER2;HSD17B11;HSD17B2;KANK2;KCNJ16;KLF10;LAMC1;LGALS4;MAOA;MGLL;MYLK;NFIB;NFIC;NR2F2;PAH;PERP;PHGDH;PTPRF;RAP1GAP;SCARB2;SDC4;SERPINA6;SH3YL1;SHANK2;SLC17A4;SLC37A4…
AIZARANI_LIVER_C34_MHC_II_POS_B_CELLS	2.3558	2.96056	2.99943	-1.45626	-2.6141	0.0004576	0	0	0.0956972	7.98319e-05	4930523C07RIK;AEBP1;AFF3;ATP2B1;BANK1;BCL11A;BICD2;BIRC3;CD19;CD22;CD52;CD79A;CD79B;CD82;CD83;CIITA;CLEC2H;CORO1A;CYBB;CYFIP2;DGKD;EBF1;FCMR;FCRLA;H2-AB1;H2-EB2;IQSEC1;IRF8;ITM2C;LAPTM5;LIMD2;LTB;LUC7L3;LYN;LYST;MAP3K1;MAP3K8;MDM4;MKNK2;MS4A1;MTPN;NAP1L1;NCF1;NCOA3;ORAI2;PARP1;PCDH9;PDE7A;PLAC8;PLEKHA2;POU2AF1;PPM1K;PRKCB;RALGPS2;RCSD1;RIPOR2;RPL39;RPS23;RUBCNL;SLC9A7;SP100;SPIB;STX7;SWAP70;SYK;T…	AEBP1;AFF3;ARL10;ATF7IP;ATP2B1;BCL11A;BICD2;BIRC3;BOD1L;CCR7;CD19;CD22;CD37;CD52;CD79A;CD79B;CD83;CIITA;CLCN6;CLN8;CORO1A;CXCR4;CYBB;CYFIP2;DDX6;DGKD;DOK3;EBF1;FCMR;FCRLA;FOXP1;H2-AB1;H2-EB2;IL4RA;IQSEC1;IRF8;ISG20;ITM2C;LAPTM5;LTB;LYN;LYST;MAP3K1;MAP3K8;MDM4;MKNK2;MPEG1;MS4A1;NAP1L1;NCF1;ORAI2;PAX5;PCDH9;PDE7A;PLAC8;PLEKHA2;POU2F2;PRKCB;PTPN6;RALGPS2;RCSD1;RIPOR2;RNASE6;RUBCNL;SELL;SLC9A7;SP100;…	AEBP1;AFF3;ATF7IP;ATP2B1;BCL11A;BICD2;CCR7;CD19;CD22;CD37;CD52;CD79A;CD79B;CD83;CIITA;CLEC2H;CLN8;CORO1A;CXCR4;CYBB;CYFIP2;DGKD;EBF1;FCMR;FCRLA;H2-AB1;H2-EB2;IQSEC1;IRF8;ISG20;ITM2C;LAPTM5;LTB;MAP3K1;MAP3K8;MDM4;MKNK2;MPEG1;MS4A1;NAP1L1;NCF1;ORAI2;PCDH9;PDE7A;PLAC8;PLEKHA2;POU2AF1;POU2F2;PRKCB;RALGPS2;RCSD1;RNASE6;RUBCNL;SELL;SLC9A7;SP100;SPIB;STX7;SWAP70;SYK;TLR6;TMEM154;TTN;UCP2;YBX3	AFF3;ARHGEF18;ARL10;ATF7IP;BCL11A;BOD1L;CD37;CD83;CIITA;CLCN6;CLN8;CNTRL;CORO1A;CXCR4;CYBB;CYFIP2;DOK3;FOXP1;H2-AB1;IL4RA;IRF8;ISG20;LAPTM5;LTB;MAP3K1;MPEG1;NCF1;ORAI2;PAX5;PCDH9;POU2F2;PRKCB;PTPN6;RNASE6;RPLP2;RUBCNL;SELL;SLC9A7;TLR6	AEBP1;ARL10;BACH2;BANK1;CD19;CD22;CD37;CD52;CD79A;CD79B;CD83;CLCN6;CORO1A;CXCR4;CYBB;CYFIP2;DGKD;EEF1B2;FAU;IRF8;ISG20;ITM2C;KLF2;LAPTM5;LIMD2;LTB;LYN;MAP3K8;MS4A1;NCF1;ORAI2;PARP1;PLAC8;PLEKHA2;POU2F2;PRKCB;RCSD1;RNASE6;RPL13A;RPL18;RPLP2;RPS11;RPS5;RPS8;SELL;SLC9A7;SP100;SPIB;STX7;SYK;TLR6;UCP2;YBX3
AIZARANI_LIVER_C28_NK_NKT_CELLS_6	2.19255	3.3769	3.4034	-2.15748	-1.72307	0.00178951	0	0	0.00641879	0.022424	AKNA;ANXA1;ARHGDIB;ATP1B3;AUTS2;BCL11B;BTG1;CD44;CD52;CD53;CDC42SE2;CYTIP;ETS1;EVI2A;FYN;GATA3;IL7R;ITK;MAF;MYBL1;NR3C1;PARP8;PBXIP1;PDE7A;PIK3R1;PPP1R2;PRDM1;PTGER4;PTPRC;RCAN3;RGS1;RUNX3;SAMSN1;SLA;SLC38A1;SRGN;STK17B;TCF7;TENT5C;TNFAIP3;TSC22D3;TXNIP;WIPF1	AKNA;ANXA1;ARHGDIB;AUTS2;BCL11B;BTG1;CD44;CD52;CD53;CDC42SE2;CRYBG1;CXCR4;CXCR6;CYTIP;DUSP4;EMB;ETS1;EVI2A;FNBP1;FYN;GPR171;IL7R;ITK;LCP1;LEPROTL1;MYBL1;NFKB1;PARP8;PBXIP1;PDE4D;PDE7A;PRDM1;PTGER4;PTPRC;RBPJ;RCAN3;RGS1;RUNX3;SAMSN1;SATB1;SH2D2A;SLA;SLC38A1;SMCHD1;SPOCK2;SRGN;STK17B;TCF7;TNFAIP3;TXNIP;WIPF1;ZC3HAV1;ZFP36L2	AKNA;ANXA1;ARHGDIB;AUTS2;BCL11B;BTG1;CD44;CD52;CD53;CD69;CDC42SE2;CRYBG1;CXCR4;CXCR6;CYTIP;DUSP4;EMB;ETS1;EVI2A;FNBP1;FYN;GATA3;GPR171;IL7R;ITK;LCP1;MYBL1;NFKB1;PARP8;PBXIP1;PDE4D;PDE7A;PRDM1;PTGER4;PTPRC;RBPJ;RCAN3;RGS1;RUNX3;SAMSN1;SATB1;SH2D2A;SLA;SLC38A1;SMCHD1;SRGN;STK17B;TCF7;TENT5C;TNFAIP3;TSC22D3;TXNIP;WIPF1;ZC3HAV1;ZFP36L2	AKNA;ARHGDIB;AUTS2;CD52;CD53;CELF2;CREM;CRYBG1;CXCL13;CXCR4;CXCR6;CYTIP;DUSP4;EMB;EML4;EVI2A;FNBP1;ITK;JUNB;LEPROTL1;MYBL1;NFKB1;PARP8;PDE4D;PPP2R5C;PRDM1;PTGER4;PTPRC;RBPJ;RCAN3;RGS1;RNF125;SAMSN1;SATB1;SLA;SMCHD1;SPOCK2;STK4;TNFAIP3;WIPF1;ZC3HAV1;ZFP36L2	AKNA;ANXA1;ARHGDIB;BTG1;CD44;CD52;CD53;CDC42SE2;CRYBG1;CXCR4;CYTIP;EML4;ETS1;EVI2A;FYN;GPRIN3;KIT;LEPROTL1;MAF;NFKB1;NR3C1;PARP8;PBXIP1;PDE4D;PDE7A;PTPRC;RCAN3;RNF125;SLA;SLC38A1;SMCHD1;SRGN;STK17B;TCF7;TENT5C;TNFAIP3;WIPF1
AIZARANI_LIVER_C9_LSECS_1	3.33061	3.4956	3.41612	0	-4.98344	0	0	0	0	0	ABCG1;ACTN1;ADAMTS9;ADGRL4;ADM;AHCTF1;AKAP12;ANGPT2;ANKRD11;APP;BHLHE40;BTNL9;CAVIN1;CAVIN2;CCDC50;CD14;CD36;CD93;CDC42BPB;CDH5;CLEC14A;CLEC1B;CNN3;COL4A1;COL4A2;COL6A2;CRIM1;CXCL16;DAAM1;DENND4C;DOCK9;DUSP5;ECM1;EFNB2;EGFL7;EMP1;EPB41L2;ERG;ESAM;F8;FAM107A;FCHSD2;FHL1;FKBP1A;FLNB;FLT1;FLT4;FSCN1;FXYD6;FZD4;GNG11;GRB10;HIC1;HIPK2;HPCAL1;IGFBP7;ITGA9;KDM6B;KLF7;LDB2;LUZP1;LYVE1;MAF;MAP1B;MARCKS;MA…	ABCG1;ACKR3;ACTN1;ADAMTS4;ADAMTS9;ADM;AFF4;AKAP12;ANGPT2;ANKRD11;APP;ARGLU1;ARHGEF7;ASAP1;BST2;BTNL9;C1QTNF1;CALU;CAVIN1;CAVIN2;CCDC50;CD14;CD36;CD93;CEMIP2;CEP170;CHD7;COL4A1;COL4A2;COL6A2;CRIM1;CXCL16;DDX21;DUSP5;EDN1;EFNB2;EIF4G3;EMP1;ENG;EPB41L2;EPOR;ESAM;FAM107A;FAM43A;FGFR1;FHL1;FKBP1A;FLNB;FLT1;FLT4;FOSL2;FSCN1;FXYD6;GALNT15;GM13889;GOLGB1;GRB10;HERC1;HES1;HIC1;HIPK2;IFITM10;IGFBP7;IL33;IL…	ABCG1;ACKR3;ACTN1;ADAMTS4;ADAMTS9;ADM;AFF4;AKAP12;ANGPT2;ANKRD11;APP;ARGLU1;ARHGEF7;ASAP1;BHLHE40;BST2;BTNL9;C1QTNF1;CALU;CAVIN1;CAVIN2;CCDC50;CD14;CD36;CD93;CDC42BPB;CEMIP2;CEP170;COL4A1;COL4A2;COL6A2;CRIM1;CXCL16;DENND4C;DOCK9;DUSP5;EDN1;EFNB2;EIF4G3;EMP1;ENG;EPB41L2;ESAM;F2R;FAM107A;FAM43A;FCHSD2;FGFR1;FHL1;FKBP1A;FLNB;FLT1;FLT4;FOSL2;FSCN1;FXYD6;GALNT1;GALNT15;GM13889;GNG11;GRB10;HERC1;HIC1;H…		ABCG1;ACKR3;ACTN1;ADAMTS9;ADGRF5;ADGRL4;ADM;AKAP12;ANGPT2;APOLD1;APP;ARGLU1;ARHGEF7;BTNL9;C1QTNF1;CALU;CAVIN1;CAVIN2;CCDC50;CD93;CDH13;CDH5;CEMIP2;CLEC14A;CLEC4G;CNN3;COL4A1;COL4A2;COL6A2;DLC1;DNASE1L3;DUSP5;DUSP6;ECM1;EFNB2;EGFL7;EHD3;EMP1;ENG;EPB41L2;EPOR;ERG;ESAM;EXOC3L2;FAM43A;FHL1;FILIP1;FKBP1A;FLT1;FLT4;FSCN1;FXYD6;GATA4;GM13889;GNG11;GRB10;HERC1;HES1;HIC1;HPCAL1;IGFBP7;IL33;ITGA5;ITGA9;KCT…
AIZARANI_LIVER_C24_EPCAM_POS_BILE_DUCT_CELLS_3	3.01189	3.55171	3.65902	-2.0929	0	0	0	0	0.00722812	0	ABHD2;AKR1B10;ANXA2;ANXA4;ANXA5;ATF3;ATP1A1;ATP1B1;BACE2;BEX3;CALM2;CAPN2;CAV2;CD63;CDKN1C;CFTR;CHST4;CLDN7;CLIC1;CRYAB;DCDC2A;DDR1;DSG2;DSP;ELF3;ENAH;EPCAM;EZR;FAM102A;FXYD3;GABRP;GOLM1;GPX2;GTF2I;HBEGF;ITGB1;KCNJ15;KLF5;KRT19;LGALS2;LGALS3;LGALS4;LMO4;MUC1;MUC13;MYADM;MYO1C;NQO1;NR2F2;PMEPA1;RAB11FIP1;RBM47;S100A11;S100A6;SDCBP2;SHROOM3;SLC5A1;SORBS2;SOX4;SPATS2L;SPINK1;SPINT1;SPP1;SPTBN1;TAGLN…	ABHD2;ABLIM1;ACTG1;AKR1B10;ANXA2;ANXA4;ANXA5;ATF3;ATP1B1;BEX3;CAV2;CCND1;CD63;CDC42EP1;CDH1;CFTR;CLDN7;CLIC1;CPM;CRYAB;CYSTM1;DCDC2A;DDR1;DSP;DUSP4;ELF3;ENAH;EPCAM;EZR;FAM102A;FXYD3;GABRP;GADD45A;GOLM1;GPX2;HBEGF;HSPB1;KLF5;KRT18;KRT19;KRT7;KRT8;LAD1;LGALS3;LMNA;LMO4;MLPH;MMP7;MSI2;MUC1;MYADM;MYO1C;NQO1;PLD1;PMEPA1;S100A10;S100A11;S100A6;SDCBP2;SHROOM3;SLPI;SORBS2;SOX4;SOX9;SPATS2L;SPINK1;SPINT1;…	ABHD2;ABLIM1;ACTG1;AKR1B10;ANXA2;ANXA4;ANXA5;ATF3;ATP1B1;BACE2;BEX3;BIRC3;CALM2;CAPN2;CAV2;CCND1;CD151;CD63;CDC42EP1;CDH1;CDKN1C;CFTR;CLDN7;CLIC1;CPM;CRYAB;CYSTM1;DCDC2A;DDR1;DSG2;DSP;DUSP4;DYNC1I2;ELF3;ENAH;EPCAM;EZR;FAM102A;FXYD3;GABRP;GADD45A;GOLM1;GPX2;HBEGF;HSPB1;ITGB1;KLF5;KRT18;KRT19;KRT7;KRT8;LGALS2;LGALS3;LGALS4;LMNA;LMO4;LMO7;MAL2;MLPH;MMP7;MSI2;MUC1;MYADM;MYO1C;NQO1;NR2F2;PLD1;PMEPA1;R…	ABLIM1;ACTG1;AFDN;ANXA2;ANXA5;ATF3;CCND1;CD63;CDH1;CLU;DCDC2A;DDR1;DUSP4;ENAH;GADD45A;GOLM1;GSTP2;HBEGF;HSPB1;KRT18;KRT7;KRT8;LAD1;LAMB3;LCN2;LGALS3;LMNA;MAL2;MLPH;MUC1;NECTIN2;NQO1;PLD1;PMEPA1;S100A10;S100A11;SLC4A4;SLPI;SORBS2;SOX4;SOX9;SPATS2L;SPP1;TM4SF4;TMC5;TNFRSF12A;TPPP3;TSPAN8;TUBB2A;TUBB4B
AIZARANI_LIVER_C3_NK_NKT_CELLS_2	2.58372	3.74458	3.75941	-1.85717	-3.1684	6.06061e-05	0	0	0.0187531	0	ADGRE5;AKNA;ANXA1;ARHGDIB;ARL4C;BCL11B;BCL2;BTG1;CD2;CD3G;CD44;CD48;CD52;CD53;CD8A;CLEC2H;CYTIP;DUSP2;ETS1;FYB;FYN;GATA3;GBP5;GZMA;IL7R;INPP4B;ITK;LAPTM5;LCK;LTB;MYBL1;PARP8;PBXIP1;PIK3IP1;PIP4K2A;PRDM1;PTGER4;PTPRC;RASGRP1;RHOH;RPL39;RUNX2;RUNX3;SCML4;SEMA4D;SESN1;SLA;SLC38A1;SLFN5;STK17B;SYNE2;TAGAP1;TC2N;TCF7;THEMIS;TNFAIP3;TNFAIP8;TRAT1;TSC22D3;TXNIP;WIPF1	AKNA;ANXA1;ARHGDIB;ARL4C;BCL11B;BCL2;BTG1;CD2;CD3E;CD3G;CD44;CD48;CD52;CD53;CD8A;CORO1A;CRYBG1;CXCR4;CXCR6;CYTIP;DUSP2;EMB;ETS1;FNBP1;FYB;FYN;GBP5;GPR171;GZMA;IKZF1;IKZF3;IL18RAP;IL7R;INPP4B;ITK;LAPTM5;LCK;LCP1;LTB;MDFIC;MYBL1;PARP8;PBXIP1;PIK3IP1;PIP4K2A;PRDM1;PTGER2;PTGER4;PTPRC;RAC2;RASGRP1;RHOH;RORA;RPS6KA3;RUNX2;RUNX3;SATB1;SCML4;SEMA4D;SLA;SLAMF6;SLC38A1;SLFN5;SPOCK2;STK17B;TC2N;TCF7;THEMIS…	ADGRE5;AKNA;ANXA1;ARHGDIB;ARL4C;BCL11B;BCL2;BTG1;CD2;CD3E;CD3G;CD44;CD48;CD52;CD53;CD69;CD8A;CLEC2H;CORO1A;CRYBG1;CXCR4;CXCR6;CYTIP;DUSP2;EMB;ETS1;FNBP1;FYB;FYN;GATA3;GBP5;GPR171;GZMA;IKZF1;IKZF3;IL18RAP;IL7R;INPP4B;ITK;LAPTM5;LCK;LCP1;LTB;LTK;MYBL1;PARP8;PBXIP1;PIK3IP1;PIP4K2A;PRDM1;PTGER2;PTGER4;PTPRC;RAC2;RASGRP1;RHOH;RPS6KA3;RUNX2;RUNX3;SATB1;SCML4;SEMA4D;SLA;SLAMF6;SLC38A1;SLFN5;STK17B;TC2N;…	AKNA;ARHGDIB;ARL4C;B2M;BCL2;CD52;CD53;CD8A;CELF2;CORO1A;CRYBG1;CXCR4;CXCR6;CYTIP;EMB;FNBP1;FYB;IKZF1;IKZF3;INPP4B;ITK;JUNB;LAPTM5;LCK;LTB;MDFIC;MYBL1;PAG1;PARP8;PIK3IP1;PIP4K2A;PRDM1;PRF1;PTGER2;PTGER4;PTPRC;RAC2;RHOH;RORA;RPL27A;RPLP1;RPLP2;RPS14;RPS6KA3;RUNX2;SATB1;SEMA4D;SLA;SPOCK2;STK4;TNFAIP3;WIPF1;ZC3HAV1;ZFP36L2	ADGRE5;AKNA;ANXA1;ARHGDIB;ARL4C;BCL2;BTG1;CD44;CD48;CD52;CD53;CORO1A;CXCR4;ETS1;FYB;FYN;GBP5;GZMA;IKZF1;INPP4B;LAPTM5;LCK;LTB;PARP8;PIP4K2A;PTGER2;PTPRC;RAC2;RASGRP1;RPL10A;RPL13;RPL13A;RPL18;RPL27;RPL27A;RPL28;RPLP2;RPS12;RPS14;RPS15A;RPS18;RPS19;SEMA4D;SESN1;SLA;SLC38A1;SLFN5;STK17B;TAGAP1;TC2N;TCF7;TNFAIP3;TNFAIP8;WIPF1
AIZARANI_LIVER_C18_NK_NKT_CELLS_5	2.1391	3.80327	3.77049	-2.87806	-3.12989	0.00233235	0	0	0	0	AIF1;ALOX5;ANXA1;ATP2B1;BAG3;BCL2A1B;CCDC88A;CD83;CEBPB;COTL1;CSF1R;CTSS;CYBB;DNAJA1;DNAJB1;FCER1G;FCGR3;FCGR4;FGD4;FGL2;GADD45B;GPR183;H2-AB1;H2-DMA;HBEGF;HCLS1;HSPH1;I830077J02RIK;IER3;IER5;IFI205;IGSF6;IL1B;ITGAX;JARID2;KCTD12;KLF2;KLF4;LAPTM5;LYN;MAFB;MS4A7;NCF1;NPC2;PLAUR;PLEK;PMAIP1;PSAP;RAB31;S100A11;S100A8;SAMHD1;SAT1;SCIMP;SLC7A7;TET2;TGFBI;TLR2;TYROBP;VCAN;VIM;ZEB2	AIF1;ANXA1;BCL2A1B;C3AR1;C5AR1;CCDC88A;CD37;CD83;COTL1;CTSS;CYBB;FCER1G;FCGR3;FGL2;GADD45B;GPR183;H2-AB1;H2-DMA;HBEGF;HCK;HCLS1;HSPB1;I830077J02RIK;IER3;IER5;IFI205;IGSF6;ITGAX;KCTD12;LAPTM5;LST1;MPEG1;MS4A7;NCF1;NCF2;P2RX7;PHACTR1;PLAUR;PLEK;PMAIP1;POU2F2;PSAP;PTPRE;RAB31;RGS2;RNASE6;S100A11;SAT1;SGK1;SLC11A1;SLC7A7;TET2;TGFBI;TLR2;TYROBP;VCAN;VIM;ZEB2	AIF1;ANXA1;ATP2B1;ATP6V1B2;BAG3;BCL2A1B;C3AR1;C5AR1;CCDC88A;CD37;CD83;CEBPB;COTL1;CSF1R;CTSS;CYBB;DNAJB1;FCER1G;FCGR3;FCGR4;FGL2;GADD45B;GPR183;H2-AB1;H2-DMA;HBEGF;HCK;HCLS1;HSPB1;I830077J02RIK;IER3;IER5;IFI205;IGSF6;ITGAX;JARID2;KCTD12;KLF4;LAPTM5;MPEG1;MS4A7;NCF1;NCF2;NPC2;P2RX7;PHACTR1;PLAUR;PLEK;PMAIP1;POU2F2;PSAP;PTPRE;RAB31;RGS2;RNASE6;S100A11;SAMHD1;SAT1;SCIMP;SGK1;SLC11A1;SLC7A7;TET2;TGFB…	ATP6V1B2;C3AR1;C5AR1;CD37;CD83;CEBPB;CTSS;CYBB;FCER1G;FCGR3;FGL2;FGR;GADD45B;GPR183;H2-AB1;H2-DMA;HBEGF;HCK;HCLS1;HK3;HSP90AA1;HSP90AB1;HSPB1;IER3;IER5;IFI205;IGSF6;IRAK3;ITGAX;LAPTM5;LST1;MPEG1;MS4A7;NCF1;NCF2;P2RX7;PABPC4;PHACTR1;PLAUR;PLEK;POU2F2;PTPN6;PTPRE;RAB31;RGS2;RILPL2;RNASE6;RNF144B;S100A11;SAMHD1;SAT1;SGK1;SLC11A1;TLR2;TNFAIP2;TNFRSF1B;TYROBP;VCAN;VIM	AIF1;ANXA1;ATP6V1B2;CCDC88A;CD37;CD83;COTL1;CSF1R;CYBB;FCER1G;FCGR3;FGL2;FGR;FPR1;GADD45B;HCK;HCLS1;HK3;IER3;IER5;IFI205;IGSF6;JARID2;KCTD12;KLF2;KLF4;LAPTM5;LST1;NCF1;NCF2;NPC2;PLEK;POU2F2;RAB31;RNASE6;RNF144B;S100A11;S100A8;S100A9;SAMHD1;SGK1;SLC11A1;SLC7A7;TET2;TGFBI;TLR2;TNFAIP2;TYROBP;VIM;ZEB2
AIZARANI_LIVER_C39_EPCAM_POS_BILE_DUCT_CELLS_4	2.58522	4.26673	3.97087	-2.61139	1.46758	6.41711e-05	0	0	0.000305556	0.154701	AHNAK;ALCAM;ALDH3A2;ANKRD1;ANXA2;ANXA4;ANXA5;APLP2;ATF3;ATP1A1;BICC1;CALM2;CCNL1;CD47;CD63;CFTR;CHST4;CLDN7;CREB5;CRYAB;CSF1;CTBP2;CX3CL1;DCDC2A;DSG2;DSP;ELF3;ENAH;EPCAM;EZR;FLNA;GPRC5B;HBEGF;HMGCR;IFNGR2;INHBA;ITGB1;ITGB8;KDM6B;KLF5;KLF6;KRT19;MAFF;MCAM;MYADM;MYO1C;NCOA7;NEDD9;NRADD;NRG1;PFKP;PKHD1;PKP4;PMEPA1;RAB11FIP1;RTN4;S100A11;S100A6;SLC5A1;SORBS2;SOX4;SPATS2L;SPTBN1;SYNE2;SYNJ2;THBS1;TM4S…	ACTG1;AHNAK;ALCAM;ALDH3A2;ANKRD1;ANXA2;ANXA4;ANXA5;ATF3;BAZ1A;BICC1;CCL2;CD63;CDC42EP1;CDH1;CFTR;CITED4;CLDN7;CPM;CREB5;CRIM1;CRYAB;CSF1;CTBP2;CX3CL1;DCDC2A;DSP;DST;EDN1;ELF3;ENAH;EPCAM;EZR;FGFR2;FLNA;FLNB;GADD45A;GDF15;GPRC5B;HBEGF;HSPB1;IFNGR2;IRS2;ITGB8;KLF5;KLF6;KRT18;KRT19;KRT7;KRT8;KRT80;LAD1;LAMC2;MAFF;MCAM;MMP7;MYADM;MYH9;MYO1C;NCOA7;NEDD9;NFKB2;NRADD;NRG1;PFKP;PKHD1;PMEPA1;RTN4;S100A11;S…	ACTG1;AHNAK;ALCAM;ALDH3A2;ANKRD1;ANXA2;ANXA4;ANXA5;APLP2;ATF3;BAZ1A;BICC1;BIRC3;CALM2;CCL2;CCNL1;CD151;CD47;CD63;CDC42EP1;CDH1;CFTR;CITED4;CLDN7;CPM;CREB5;CRIM1;CRYAB;CSF1;CTBP2;CX3CL1;DCDC2A;DSG2;DSP;DST;EDN1;ELF3;ENAH;EPCAM;EZR;FGFR2;FLNA;FLNB;FSTL3;GADD45A;GDF15;GPRC5B;HBEGF;HSPB1;IFNGR2;IRS2;ITGB1;ITGB8;KDM6B;KLF5;KLF6;KRT18;KRT19;KRT7;KRT8;KRT80;LAMC2;MAFF;MCAM;MMP7;MYADM;MYH9;MYO1C;NCOA7;NE…	ABCB1B;ACTG1;ACTN4;AFDN;AI661453;ALCAM;ANXA2;ANXA5;ATF3;ATF4;BAZ1A;BCL2L1;BICC1;CCL2;CD63;CDH1;CLDN1;CX3CL1;DCDC2A;DST;EDN1;EGFR;ENAH;EPHA2;FGFR2;GADD45A;GDF15;GPRC5B;HBEGF;HSP90AA1;HSP90AB1;HSPB1;IRS2;ITGB8;ITPKC;KLF6;KRT18;KRT7;KRT8;LAD1;LAMB3;LAMC2;MYADM;MYH9;NCEH1;NCOA7;NEDD9;NFKB1;NFKB2;NRG1;PDLIM1;PFKP;PKHD1;PMEPA1;RNF19A;RRBP1;S100A11;S100A6;SERPINA3N;SLC3A2;SLC7A1;SORBS2;SOX4;SOX9;SPATS2L…	ABCB1B;ADAM9;AFDN;AI661453;ALDH3A2;DST;EGFR;EPHA2;FLNB;GDF15;HSP90AA1;HSPB1;KRT18;KRT8;LAD1;LAMB3;LAMP2;MYO6;NCEH1;PIM3;PKP4;SCARB2;SGMS2;SOX9;SPINT2;SQSTM1;VCL;ZBTB20
AIZARANI_LIVER_C20_LSECS_3	2.90747	4.14556	4.08855	0	-4.25082	0	0	0	0	0	ACTN1;ADAMTS9;ADGRL4;ADM;AHCTF1;AKAP12;ANKRD11;APP;ARGLU1;ARHGAP23;ASAP1;B4GALT5;BHLHE40;BMPR2;BNIP3L;BTNL9;CAVIN1;CAVIN2;CCDC50;CD14;CD36;CD93;CDC42BPB;CDH5;CEMIP2;CHSY1;CLEC1B;COL4A1;COL4A2;CRIM1;CSNK1E;CXCL16;DAAM1;DCUN1D3;DUSP5;EFNB2;EMP1;ENG;ERG;ESAM;ETS2;F8;FAM107A;FKBP1A;FLNB;FLT1;FXYD6;GALNT1;GRB10;HIC1;HIPK2;HPCAL1;IGFBP7;ITGA9;IVNS1ABP;KDM6B;KLF7;LDB2;LUZP1;LYVE1;MACF1;MAP1B;MARCKS;MARC…	ACKR3;ACTN1;ADAMTS1;ADAMTS4;ADAMTS9;ADM;AFF4;AKAP12;ANKRD11;APP;ARHGAP23;ARHGEF7;ASAP1;B4GALT5;BAZ1A;BDP1;BMPR2;C1QTNF1;CAVIN1;CCDC50;CD14;CD36;CD9;CD93;CDK17;CDKN1A;CEMIP2;CEP170;CHD7;CHSY1;COL4A1;COL4A2;CRIM1;CSNK1E;CXCL16;DAB2;DUSP5;EFNB2;EIF5B;EMP1;ENG;ETS2;FAM107A;FGFR1;FKBP1A;FLNB;FLT1;FNDC3B;FOSL2;FXYD6;GM13889;GOLGB1;GRB10;HERC1;HIC1;ICAM1;IGFBP7;IL33;IL4RA;ITGA5;ITGA9;ITPKC;JAM3;JMJD1C;J…	ACKR3;ACTN1;ADAMTS1;ADAMTS4;ADAMTS9;ADM;AKAP12;ANKRD11;APP;ARHGAP23;ARHGEF7;ASAP1;B4GALT5;BAZ1A;BDP1;BMPR2;BTNL9;C1QTNF1;CAVIN1;CAVIN2;CCDC50;CD14;CD36;CD9;CD93;CDK17;CDKN1A;CEMIP2;CEP170;CHSY1;COL4A1;COL4A2;CRIM1;CSNK1E;CXCL16;DAB2;DUSP5;EFNB2;EMP1;ENG;ESAM;ETS2;FAM107A;FGFR1;FKBP1A;FLNB;FLT1;FOSL2;FXYD6;GM13889;GRB10;HERC1;HIC1;HPCAL1;ICAM1;IGFBP7;ITGA5;ITGA9;IVNS1ABP;JAM3;JUND;KDM6B;KLF7;LDB2;…		ACKR3;ACTN1;ADAMTS1;ADAMTS9;ADGRF5;ADGRL4;ADM;AKAP12;APOLD1;APP;ARGLU1;ARHGAP23;ARHGEF7;BTNL9;C1QTNF1;CAVIN1;CAVIN2;CCDC50;CD93;CDH5;CDKN1A;CEMIP2;CHSY1;CLEC4G;CNKSR3;COL4A1;COL4A2;CSNK1E;DAB2;DLC1;DNASE1L3;DUSP5;DUSP6;EFNB2;EMP1;ENG;ERG;ESAM;ETS2;FAM43A;FILIP1;FKBP1A;FLT1;FXYD6;GM13889;GRB10;HERC1;HIC1;HPCAL1;ICAM1;IGFBP7;IL33;ITGA5;ITGA9;JAM3;KCTD20;KDM6B;KDR;KLF7;LDB2;LGMN;LIMCH1;LRRC32;LUZP1;…
AIZARANI_LIVER_C23_KUPFFER_CELLS_3	2.66922	4.65982	4.31914	-2.30908	-3.99408	0	0	0	0.00369126	0	AGFG1;AHR;AIF1;ALDOA;ALOX5;ANXA1;AP1S2;APLP2;ARRB2;ATP2B1;BASP1;BCL2A1B;CALM2;CCDC69;CCDC88A;CD14;CD44;CD52;CD55;CD93;CDC42EP3;CFD;CKAP4;CLEC12A;COTL1;CPPED1;CREB5;CTSS;CYBB;FBLIM1;FCER1G;FCGR3;FGL2;FKBP1A;FYB;GAS7;GCA;GK;GLIPR2;GMFG;GNAI2;GRK2;HCLS1;I830077J02RIK;IFI205;IFNGR2;IGSF6;IL1B;ITGAX;JARID2;JDP2;KCTD12;KLHL8;LAPTM5;LGALS1;LIMS1;LRRK2;LY86;MACC1;MAFB;MEGF9;MPP1;NAMPT;PARVG;PKM;PLAUR;PLE…	AGFG1;AIF1;ALDOA;ANXA1;AP1S2;ARRB2;BASP1;BCL2A1B;C5AR1;CCDC88A;CD14;CD37;CD44;CD52;CD93;CDC42EP3;CKAP4;CLEC12A;COTL1;CREB5;CSF3R;CTSS;CYBB;FBLIM1;FCER1G;FCGR3;FGL2;FKBP1A;FYB;GAS7;GLIPR2;GMFG;GNAI2;GRN;HCK;HCLS1;I830077J02RIK;IFI205;IFNGR2;IGSF6;IRS2;ITGAX;ITGB2;JDP2;KCTD12;LAPTM5;LGALS1;LIMS1;LRRK2;LST1;LY86;MACC1;MEGF9;MPEG1;MPP1;MYO1F;NAMPT;NCF2;PARVG;PCDH11X;PKM;PLAUR;PLCB2;PLEK;PLP2;PLXDC2;P…	ACTB;AGFG1;AHR;AIF1;ALDOA;ANXA1;AP1S2;APLP2;ARRB2;ATP2B1;ATP6V0B;ATP6V1B2;BASP1;BCL2A1B;C5AR1;CALM2;CCDC88A;CD14;CD37;CD44;CD52;CD93;CDC42EP3;CKAP4;CLEC12A;CLEC4E;COTL1;CREB5;CSF3R;CSGALNACT2;CTSB;CTSS;CYBB;DOK3;EFHD2;EREG;FBLIM1;FCER1G;FCGR3;FGL2;FKBP1A;FYB;GAS7;GCA;GK;GLIPR2;GMFG;GNAI2;GRK2;GRN;HCK;HCLS1;I830077J02RIK;IFI205;IFNGR2;IGSF6;IRS2;ITGAX;ITGB2;JARID2;JDP2;KCTD12;LAPTM5;LGALS1;LIMS1;L…	ACTB;BASP1;C5AR1;CD37;CD52;CDC42EP3;CKAP4;CLEC12A;CNTRL;CSF3R;CTSS;CYBB;DOK3;EMILIN2;FBLIM1;FGL2;FGR;FKBP1A;FYB;GLIPR2;GMEB1;GMFG;GRN;HCK;HCLS1;HK3;IFI205;IL17RA;IRAK3;IRS2;ITGAX;ITGB2;JDP2;LAPTM5;LRRFIP1;LST1;LY86;MPEG1;MYO1F;NCF2;NFAM1;NLRP12;PARVG;PHC2;PLAUR;PLCB2;PLEK;PLXDC2;POU2F2;PRKCB;PTAFR;PTPRE;RASSF2;RGS2;RHOG;RILPL2;RNF144B;ROCK1;S100A10;S100A11;S100A6;SAMSN1;SELL;SH3BGRL3;SKAP2;SLA;SL…	ACTB;AHR;AIF1;ANXA1;AP1S2;ARRB2;ATP6V0B;ATP6V1B2;BASP1;CALM2;CCDC88A;CD300E;CD37;CD44;CD52;CD55;CD93;CDC42EP3;CFP;CKAP4;CLEC12A;COTL1;CSGALNACT2;CTSB;CYBB;DOK3;DUSP6;FBLIM1;FCER1G;FCGR3;FGL2;FGR;FKBP1A;FPR1;FYB;GCA;GK;GLIPR2;GMEB1;GNAI2;HCK;HCLS1;HK3;IFI205;IFNGR2;IGSF6;IRS2;ITGB2;JARID2;JDP2;KCTD12;KLHL8;LAPTM5;LIMS1;LRRK2;LST1;LY86;LYN;MEGF9;METTL21A;MPP1;NAMPT;NCF2;NFAM1;OAZ1;PARVG;PHC2;PILRB1…
AIZARANI_LIVER_C6_KUPFFER_CELLS_2	3.42255	4.67901	4.4604	-1.68931	-4.58029	0	0	0	0.0394371	0	AIF1;ALOX5;ARPC1B;ARRB2;ASAH1;ATP6AP1;AXL;BASP1;BLVRB;C1QA;C1QB;C1QC;CALHM6;CCDC88A;CD14;CD83;CD84;CD86;CEBPB;CFD;CFP;COLGALT1;COTL1;CPM;CREG1;CSF1R;CTSB;CTSS;CXCL12;CXCL16;CYBA;CYBB;DAB2;EPB41L2;EPB41L3;FCER1G;FCGR3;FCGR4;FGD2;FGL2;FILIP1L;FMNL2;FOLR2;FYB;GNAI2;GPR34;GRK2;H2-DMA;H2-DMB1;H2-EB2;HCLS1;HMOX1;I830077J02RIK;IER3;IFIT3;IFNGR2;IGSF6;IL18;IL1B;ITGAX;KCTD12;KLF4;LAIR1;LAPTM5;LGMN;LIMS1;L…	ACTB;AIF1;ARPC1B;ARRB2;ASAH1;ATP6V1B2;AXL;BASP1;C1QA;C1QB;C1QC;C3AR1;C5AR1;CCDC88A;CD14;CD83;CD84;CD86;CEBPB;CLN8;COLGALT1;COTL1;CPM;CREG1;CTSS;CXCL16;CYBA;CYBB;DAB2;EPB41L2;FCER1G;FCGR3;FGD2;FGL2;FGR;FILIP1L;FMNL2;FRMD4A;FRMD4B;FYB;GNAI2;GPNMB;GPR34;GRINA;GRN;H2-DMA;H2-DMB1;H2-EB2;HCK;HCLS1;HMOX1;I830077J02RIK;IER3;IFIT3;IFNGR2;IGSF6;ITGAX;ITGB2;KCTD12;LAIR1;LAPTM5;LGMN;LIMS1;LRRC25;LST1;LYVE1;M…	AIF1;ARPC1B;ARRB2;ASAH1;ATP6V1B2;AXL;BASP1;C1QA;C1QB;C1QC;C3AR1;C5AR1;CCDC88A;CD14;CD83;CD84;CD86;CEBPB;CLN8;COLGALT1;COTL1;CPM;CREG1;CTSB;CTSS;CXCL16;CYBA;CYBB;DAB2;EPB41L2;EPB41L3;FCER1G;FCGR3;FGD2;FGL2;FILIP1L;FMNL2;FRMD4A;FRMD4B;FYB;GNAI2;GPNMB;GPR34;GRINA;GRK2;GRN;H2-DMA;H2-DMB1;H2-EB2;HCK;HCLS1;HMOX1;I830077J02RIK;IER3;IFIT3;IFNGR2;IGSF6;ITGAX;ITGB2;KCTD12;KLF4;LAIR1;LAPTM5;LGMN;LIMS1;LIPA;…	ACTB;BASP1;C1QA;C1QC;C3AR1;C5AR1;CD4;CD83;CD84;CLN8;CNTRL;CTSC;CTSS;CXCL16;CYBB;F13A1;FGD2;FGL2;FGR;FRMD4A;FRMD4B;FYB;GPNMB;GRINA;GRN;H2-DMA;H2-DMB1;HCK;HCLS1;HK3;IER3;IFIT3;IRAK3;ITGAX;ITGB2;ITSN1;LAIR1;LAPTM5;LRRC25;LST1;MPEG1;MS4A4D;MS4A6D;MS4A7;NCKAP1L;PDK4;PLD3;PLEK;PLXDC2;POU2F2;PTAFR;RAP2B;RBPJ;RGS1;RGS2;RHOG;RNASE6;RNF144B;S100A11;SGK1;SKAP2;SLA;SLC11A1;SLC15A3;SNX10;SPI1;TBXAS1;TLR2;TNFA…	ACTB;AIF1;ARPC1B;ARRB2;ASAH1;ATP6V1B2;AXL;BASP1;C1QA;C1QB;C1QC;CCDC88A;CD5L;CD83;CD84;CD86;CFP;COTL1;CPM;CSF1R;CTSB;CYBA;CYBB;DAB2;EPB41L2;EPB41L3;FCER1G;FCGR3;FGD2;FGL2;FGR;FILIP1L;FOLR2;FRMD4A;FYB;GNAI2;HCK;HCLS1;HK3;HMOX1;IER3;IGSF6;ITGB2;ITSN1;KCTD12;KLF4;LAIR1;LAPTM5;LGMN;LIMS1;LIPA;LRRC25;LST1;LYVE1;MAF;MARCKS;MARCO;MERTK;MPP1;MRC1;MSR1;NAGK;NCKAP1L;NPC2;P2RY13;PDK4;PILRB1;PLEK;PLXDC2;POU2F…
AIZARANI_LIVER_C10_MVECS_1	3.57283	4.30561	4.61552	-1.54666	-6.33527	0	0	0	0.0719561	0	A2M;ACVRL1;ADAM15;ADAMTS9;ADGRL4;ANXA2;APP;ARAP3;ARHGAP23;ARHGAP31;ASAP1;ATN1;BCAM;BHLHE40;BMPR2;BTNL9;CALCRL;CAV1;CAV2;CAVIN1;CAVIN2;CCM2L;CD300LG;CD34;CD36;CD93;CDC42EP3;CDH5;CHSY1;CLDN5;CLEC14A;COL4A1;CPE;CPNE2;CRIM1;DLC1;DOCK9;DPYSL3;EDNRB;EFNB2;EGFL7;ELK3;EMCN;EMP1;EMP2;ENG;EPHB4;ERG;ESAM;F8;FAM107A;FBLN2;FKBP1A;FLNB;FLT1;FXYD6;FZD4;GIMAP8;GJA1;GNA11;GNG11;GRB10;GSN;H2-EB2;HDAC7;HECW2;HEG1;H…	ACVRL1;ADAM15;ADAMTS1;ADAMTS9;AIF1L;ALPL;ANXA2;APP;ARHGAP23;ARHGAP31;ASAP1;ATN1;BCAM;BMPR2;C7;CAV1;CAV2;CAVIN1;CCM2L;CD34;CD36;CD9;CD93;CDC42EP3;CDKN1A;CHRM3;CHSY1;CLIC4;COL15A1;COL4A1;CRIM1;CRIP2;DPYSL3;EDN1;EDNRB;EFNB2;ELK3;EMP1;EMP2;ENG;FAM107A;FBLN2;FKBP1A;FLNB;FLT1;FXYD6;GALNT15;GAS6;GIMAP8;GJA1;GM13889;GNAS;GRB10;GSN;H2-EB2;HDAC7;HEG1;HES1;ID1;ID3;IGFBP7;IL33;ITGA5;ITGA6;ITM2A;KCNN3;KLF7;LA…	A2M;ACVRL1;ADAM15;ADAMTS1;ADAMTS9;AIF1L;ALPL;ANXA2;APP;ARHGAP23;ARHGAP31;ASAP1;ATN1;BCAM;BMPR2;BTNL9;C7;CAV1;CAV2;CAVIN1;CAVIN2;CCM2L;CD34;CD36;CD9;CD93;CDC42EP3;CDKN1A;CHRM3;CHSY1;COL15A1;COL4A1;CPE;CRIM1;DPYSL3;EDN1;EDNRB;EFNB2;ELK3;EMCN;EMP1;EMP2;ENG;EPHB4;ESAM;FAM107A;FBLN2;FKBP1A;FLNB;FLT1;FXYD6;GALNT15;GAS6;GIMAP8;GJA1;GM13889;GRB10;GSN;H2-EB2;HDAC7;HEG1;HS3ST1;IGFBP7;ITGA5;ITGA6;ITM2A;KCNN…	ADAMTS1;ADAMTS9;ALPL;ANXA2;APOLD1;ARL15;BCAM;C7;CD34;CD9;CDC42EP3;CDKN1A;CHRM3;CLIC4;COL15A1;CRIP2;CSRNP1;EDN1;EMP1;EMP2;FBLN2;FXYD6;GALNT15;GAS6;GJA1;GM13889;GNAS;GSN;HES1;HYAL2;ID1;ID3;IL33;IL6ST;ITGA5;JAM2;JUNB;LIMCH1;LMNA;LMO2;LRRC32;MAST4;MIDN;MMRN1;NEDD9;NPDC1;NUAK1;PALMD;PDGFB;PLAT;PRSS23;PTGDS;PTPN14;RHOJ;RPS6KA2;RUNX1T1;SERPINB6B;SGK1;SHROOM4;SMAD6;SOCS3;SOX17;SOX7;SPARCL1;ST6GALNAC3;SYN…	ACVRL1;ADAM15;ADAMTS1;ADAMTS9;ADCY4;ADGRF5;ADGRL4;ANXA2;APOLD1;APP;AQP1;ARAP3;ARHGAP23;ARHGAP31;BCAM;BTNL9;CALCRL;CASKIN2;CAV1;CAV2;CAVIN1;CAVIN2;CCM2L;CD320;CD34;CD93;CDC42EP3;CDH5;CDKN1A;CHSY1;CLDN5;CLEC14A;CLIC4;COL4A1;CPE;CPNE2;CRIP2;CYYR1;DLC1;DNASE1L3;DPYSL3;DUSP6;DYSF;EDNRB;EFNB2;EGFL7;ELK3;EMCN;EMP1;ENG;EPHB4;ERG;ESAM;EXOC3L2;FBLN2;FILIP1;FKBP1A;FLT1;FXYD6;GIMAP8;GJA1;GM13889;GNG11;GRB10;…
AIZARANI_LIVER_C7_EPCAM_POS_BILE_DUCT_CELLS_2	3.67901	4.62367	4.74257	-2.254	-1.35827	0	0	0	0.00413558	0.124539	ABCC3;ALCAM;ALDH3A2;AMOTL2;ANKRD1;ANXA2;ANXA3;ANXA4;ANXA5;ARRDC2;ATF3;ATP1A1;ATP1B1;BACE2;BEX3;BICC1;C77080;CALM2;CAMK2N1;CAV2;CCDC198;CDC42EP1;CDKN1C;CFTR;CHST4;CKB;CLDN7;CLIC6;CLMN;CPM;CREB5;CRIM1;CRYAB;CTBP2;CTDSPL;CXADR;DCDC2A;DDR1;DSG2;DSP;DSTN;ELF3;EMP2;ENAH;EPB41L1;EPCAM;ERICH5;FAM171A1;FGFR3;FZD1;GABRP;GLIS3;GOLM1;GTF2I;ITGB1;ITGB5;ITGB8;KIF12;KLF5;KRT19;LAMA5;LAMC1;LGALS3BP;LGALS4;MAFF;M…	ABLIM1;ACTG1;ALCAM;ALDH3A2;ANKRD1;ANXA2;ANXA3;ANXA4;ANXA5;ATF3;ATP1B1;BEX3;BICC1;CAV2;CCDC198;CCND1;CDC42EP1;CDH1;CFTR;CITED4;CKB;CLDN7;CLIC6;CPM;CREB5;CRIM1;CRYAB;CTBP2;CTDSPL;CTNND2;CXADR;DCDC2A;DDR1;DSP;EGR1;ELF3;EMP2;ENAH;EPB41L1;EPCAM;ERICH5;FAM110C;FGFR2;FGFR3;FZD1;GABRP;GDF15;GLIS3;GOLM1;ITGB5;ITGB8;KIF12;KIFC3;KLF5;KRT18;KRT19;KRT7;KRT8;LAD1;LAMA5;LAMC1;LAMC2;LGALS3BP;MAFF;MMP7;MYADM;MYO1…	ABCC3;ABLIM1;ACTG1;ALCAM;ALDH3A2;ANKRD1;ANXA2;ANXA3;ANXA4;ANXA5;ATF3;ATP1B1;BEX3;BICC1;CAV2;CCDC198;CCND1;CDC42EP1;CDH1;CDKN1C;CFTR;CITED4;CKB;CLDN7;CLIC6;CREB5;CRIM1;CRYAB;CTBP2;CTDSPL;CTNND2;CXADR;DCDC2A;DDR1;DSP;EGR1;ELF3;EMP2;ENAH;EPB41L1;EPCAM;ERICH5;FGFR3;FSTL3;FZD1;GABRP;GDF15;GLIS3;GOLM1;ITGB5;ITGB8;KIF12;KIFC3;KLF5;KRT18;KRT19;KRT7;KRT8;LAMA5;LAMC1;LAMC2;LGALS3BP;MAFF;MMP7;MYADM;MYO10;MY…	ABLIM1;AFDN;ANXA5;ATF3;BICC1;CCDC198;CCND1;CDH1;CYP3A13;DCDC2A;DDR1;EGR1;EMP2;ENAH;EPB41L1;EPHA2;FAM110C;GDF15;GLIS3;GOLM1;GSTP2;ITGB8;KIF12;KIFC3;KRT18;KRT7;LAD1;LAMC2;NEDD4L;PAWR;PMEPA1;RBPMS;RHBDF1;SDC1;SLPI;SOX4;SOX9;SPATS2L;SPP1;TEAD1;THSD4;TM4SF4;TMPRSS2;TNFRSF12A;TPPP3;VCAN;WNK2;ZBTB20	ACTG1;AGT;ANXA2;ANXA3;AQP1;ATF3;ATP1B1;BACE2;BEX3;BICC1;CAV2;CCND1;CDH1;CDKN1C;CKB;CLDN1;CPM;CRYAB;CTBP2;CTDSPL;DCDC2A;DDR1;EGR1;ENAH;FAM110C;FAM171A1;FZD1;GOLM1;KCNJ16;KRT19;KRT7;LAMA5;LAMC1;MYADM;OCLN;PKHD1;PROM1;RASSF4;RHBDF1;S100A6;SH3YL1;SHANK2;SLC17A4;SLC37A4;SOD3;SOX4;SPATS2L;TEAD1;THSD4;TM4SF1;TMPRSS2;TPM1;TPPP3
AIZARANI_LIVER_C33_STELLATE_CELLS_2	3.87768	4.33613	4.85103	0	-3.32813	0	0	0	0	0	A2M;ACTA2;ANK3;ANTXR1;ATN1;BGN;CAV1;CAVIN3;CCDC3;COL1A1;COL1A2;COL3A1;COL4A1;COL4A2;COL5A1;COL6A1;COL6A2;COLEC11;CPE;CRYAB;EBF1;ENAH;EPB41L2;FLNA;FXYD6;GPX3;IGFBP5;IGFBP7;ITGB1;KANK2;KLHL23;LAMB1;LAMC1;LGALS1;LHFP;MCAM;MGP;MYH11;MYL9;MYLK;NEXN;NID1;NRXN1;NT5DC2;PBX1;PCM1;PPP1R12B;PXDN;RBMS3;RCAN2;RGS5;SEMA5A;SOD3;SPARC;SPARCL1;TBX2;TIMP3;TOB2;TPM1;TPM2;TSPAN3;UACA;VIM	ACTA2;ADAMTS1;ANK3;ANTXR1;ARHGEF17;ATN1;BGN;C7;CAV1;CAVIN3;CCDC3;COL1A1;COL1A2;COL3A1;COL4A1;COL4A2;COL5A1;COL6A1;COL6A2;CRISPLD2;CRYAB;CYGB;DBNDD2;DST;EBF1;ENAH;EPB41L2;FLNA;FXYD6;GM13889;GNAS;GPX3;ID3;ID4;IGFBP7;IMPA2;ISYNA1;ITGA1;KLHL23;LAMB1;LAMC1;LGALS1;LHFP;MAP1B;MCAM;MEF2D;MGP;MXRA7;MYH9;NEXN;NID1;NOTCH3;NRXN1;NT5DC2;PBX1;PCM1;PLAT;PPP1R12B;PRKG1;PXDN;RBMS3;RBPMS;RCAN2;RGS5;SEMA5A;SOD3;SPA…	A2M;ACTA2;ADAMTS1;ANK3;ANTXR1;ARHGEF17;ATN1;BGN;C7;CAV1;CAVIN3;CCDC3;CCDC92;CDC42BPA;COL1A1;COL1A2;COL3A1;COL4A1;COL4A2;COL5A1;COL6A1;COL6A2;COLEC11;CPE;CRISPLD2;CRYAB;CYGB;DST;EBF1;ENAH;EPB41L2;FLNA;FXYD6;GM13889;GPX3;ID4;IGFBP5;IGFBP7;IMPA2;ITGA1;ITGB1;KANK2;KLHL23;LAMB1;LAMC1;LGALS1;LHFP;LPP;MAP1B;MCAM;MEF2D;MGP;MXRA7;MYH11;MYH9;MYL9;NEXN;NID1;NOTCH3;NRXN1;NT5DC2;PBX1;PCM1;PLAT;PPP1R12B;PRKG1;…		ACTA2;ADAMTS1;ADGRF5;ANTXR1;ARHGEF17;CAVIN3;COL1A1;COL1A2;COL3A1;COL4A1;COL4A2;COL5A1;COL6A1;COL6A2;COLEC11;CPE;CRYAB;ENAH;EPB41L2;FLNA;FXYD6;GJA4;GM13889;IGFBP5;IGFBP7;ITGA1;KLHL23;LAMB1;LAMC1;LHFP;MCAM;MGP;MXRA7;MYH11;MYL9;NEXN;NID1;NOTCH3;NRXN1;NT5DC2;PBX1;PLAT;PPP1R12B;PRKG1;PTH1R;PXDN;RBMS3;RCAN2;RGS5;SEMA5A;SOD3;SPARC;SPARCL1;TBX2;TOB2;TPM1;TPM2;TSPAN3;VIM
AIZARANI_LIVER_C5_NK_NKT_CELLS_3	3.42229	4.8155	4.98765	-2.42551	-3.40663	0	0	0	0.00145948	0	ADGRE5;AKNA;AOAH;ARHGAP9;ARHGDIB;BTG1;CBLB;CCND2;CD160;CD2;CD247;CD53;CD7;CTSW;CYTIP;DENND2D;DUSP2;ETS1;FCER1G;FCMR;FYB;FYN;GNG2;GNPTAB;GZMA;GZMB;HCST;KLRD1;KLRK1;MYBL1;NKG7;PARP8;PDE7A;PIK3IP1;PIK3R1;PIP4K2A;PLEK;PRDM1;PRKACB;PTGER4;PTPN22;PTPRC;RASA2;RUNX3;SASH3;SLA;SLAMF7;SLC38A1;SLFN5;SRGN;SYK;TAGAP1;TOX;TSC22D3;TYROBP;WIPF1	AKNA;ALOX5AP;AOAH;ARHGAP9;ARHGDIB;BTG1;CBLB;CCND2;CD160;CD2;CD247;CD3E;CD53;CD7;CORO1A;CTSW;CXCR4;CXCR6;CYTIP;DUSP2;FCER1G;FYB;FYN;GNG2;GNPTAB;GZMA;GZMB;IKZF1;IKZF3;IL2RB;IPCEF1;ITGAL;ITGB2;KLRD1;KLRK1;LCP1;MYBL1;NCAM1;NKG7;NR4A2;PARP8;PDE7A;PIK3IP1;PIP4K2A;PLEK;PRDM1;PRKCH;PTGER4;PTPN22;PTPN4;PTPRC;RAC2;RASA2;RUNX3;SASH3;SLA;SLAMF6;SLAMF7;SLC38A1;SLFN5;SPON2;SRGN;SYK;TYROBP;WIPF1;ZFP36L2	ADGRE5;AKNA;ALOX5AP;AOAH;ARHGAP9;ARHGDIB;BTG1;CBLB;CCND2;CD160;CD2;CD247;CD3E;CD53;CD69;CD7;CORO1A;CTSW;CXCR4;CXCR6;CYTIP;DUSP2;ETS1;FCER1G;FCMR;FYB;FYN;GNG2;GNPTAB;GZMA;GZMB;HCST;IKZF1;IKZF3;IL2RB;IPCEF1;ITGAL;ITGB2;KLRD1;KLRK1;LCP1;MYBL1;NCAM1;NKG7;NR4A2;PARP8;PDE7A;PIK3IP1;PIK3R1;PIP4K2A;PLEK;PRDM1;PRKCH;PTGER4;PTPN22;PTPN4;PTPRC;RAC2;RASA2;RUNX3;SASH3;SLA;SLAMF6;SLAMF7;SLC38A1;SLFN5;SPON2;SRG…	AKNA;ALOX5AP;AOAH;ARHGDIB;BIN2;CBLB;CD53;CELF2;CORO1A;CTSW;CXCR4;CXCR6;CYTIP;FCER1G;FYB;GM36028;GZMB;IKZF1;IKZF3;IL2RB;IPCEF1;ITGAL;ITGB2;KLRK1;MYBL1;NCAM1;NR4A2;PARP8;PIK3IP1;PIP4K2A;PLEK;PRDM1;PRF1;PRKCH;PTGER4;PTPN22;PTPN4;PTPRC;RAC2;RNF125;S1PR5;SASH3;SLA;SLAMF7;SPON2;TYROBP;WIPF1;ZFP36L2	ADGRE5;AKNA;ALOX5AP;AOAH;ARHGAP9;ARHGDIB;BIN2;BTG1;CCND2;CD53;CORO1A;CXCR4;ETS1;FCER1G;FYB;FYN;GFOD1;GNG2;GZMA;GZMB;IKZF1;IL2RB;ITGAL;ITGB2;KLRK1;PARP8;PIP4K2A;PRKCH;PTPN22;PTPN4;PTPRC;RAC2;SASH3;SLA;SLC38A1;SLFN5;SYK;TOX;TYROBP;WIPF1
AIZARANI_LIVER_C29_MVECS_2	4.86662	5.4029	5.10013	-1.50487	-5.53648	0	0	0	0.0809858	0	A2M;ABI3BP;ACTN1;ADAMTS9;ADGRG1;ADGRL4;AHNAK;AKAP12;ANXA1;ANXA2;APP;ARHGAP23;ARHGAP31;ARID5B;ATN1;ATP1A1;ATP1B3;B4GALT5;BGN;BMP4;BMPR2;CALCRL;CAV1;CAV2;CAVIN1;CAVIN2;CD34;CD93;CDC42EP3;CDH5;CGNL1;CHSY1;CLDN5;CLEC14A;COL3A1;COL8A1;CPE;CRIM1;CRTAP;CSRP1;CTNNAL1;DOC2B;DOCK9;DPYSL2;DPYSL3;DSTN;EFNB2;EHD2;ELK3;EMCN;EMP1;ERG;ESAM;F8;FAM107A;FBLN2;FGD5;FGF2;FILIP1L;FKBP1A;FLNB;FLT1;FNIP2;FXYD6;GJA5;GNAI…	ABI3BP;ABLIM1;ACKR3;ACTN1;ADAMTS1;ADAMTS4;ADAMTS9;ADGRG1;AHNAK;AIF1L;AKAP12;ANXA1;ANXA2;APP;ARHGAP23;ARHGAP31;ARL4A;ASAP1;ATN1;B4GALT5;BGN;BMP4;BMPR2;BMYC;C7;CAV1;CAV2;CAVIN1;CD34;CD9;CD93;CDC42EP3;CDKN1A;CHSY1;COL3A1;COL8A1;CRIM1;CRIP2;CRTAP;CSRP1;CTNNAL1;DKK3;DPYSL2;DPYSL3;EDN1;EFNB2;EHD2;EHD4;ELK3;EMP1;ENG;FAM107A;FBLN2;FGF2;FILIP1L;FKBP1A;FLNB;FLOT1;FLT1;FXYD6;GALNT15;GJA1;GJA5;GM13889;GNAI2;…	A2M;ABI3BP;ABLIM1;ACKR3;ACTN1;ADAMTS1;ADAMTS4;ADAMTS9;ADGRG1;AHNAK;AIF1L;AKAP12;ANXA1;ANXA2;APP;ARHGAP23;ARHGAP31;ASAP1;ATN1;B4GALT5;BGN;BMP4;BMPR2;C7;CAV1;CAV2;CAVIN1;CAVIN2;CD34;CD9;CD93;CDC42EP3;CDKN1A;CHSY1;COL3A1;COL8A1;CPE;CRIM1;CRTAP;CSRP1;CTNNAL1;DKK3;DPYSL2;DPYSL3;EDN1;EFNB2;EHD2;EHD4;ELK3;EMCN;EMP1;ENG;ESAM;FAM107A;FBLN2;FGF2;FILIP1L;FKBP1A;FLNB;FLT1;FXYD6;GALNT15;GJA1;GJA5;GM13889;GNAI…	ABI3BP;ABLIM1;ACKR3;ADAMTS1;ADAMTS4;ADAMTS9;ADGRG1;ANXA2;APOLD1;ARL4A;BGN;BMYC;C7;CD34;CD9;CDC42EP3;CDKN1A;COL8A1;CRIP2;CRTAP;CSRP1;CTNNAL1;DKK3;EDN1;EHD2;EHD4;EMP1;FBLN2;FLOT1;FXYD6;GALNT15;GJA1;GM13889;GNAS;GPX3;GSN;HBEGF;HSPB1;HYAL2;ID1;ID3;IL1R1;IL33;ITGA5;ITPKC;JAM2;JUND;LIMCH1;LMNA;LMO2;LRRC32;MAST4;MIDN;MMRN1;MYOF;NEDD9;NFATC2;NOLC1;NPDC1;NR2F1;PALMD;PDLIM1;PRSS23;PTGDS;PTGIS;PTPN14;RBMS3;…	ABI3BP;ACKR3;ACTN1;ADAMTS1;ADAMTS9;ADGRF5;ADGRG1;ADGRL4;AKAP12;ANXA1;ANXA2;APOLD1;APP;AQP1;ARHGAP23;ARHGAP31;AVPI1;BMP4;C1QTNF1;CALCRL;CAV1;CAV2;CAVIN1;CAVIN2;CD320;CD34;CD55;CD93;CDC42EP3;CDH5;CDKN1A;CHSY1;CLDN5;CLEC14A;COL3A1;COL8A1;CPE;CRIP2;CRTAP;CSRP1;CYYR1;DLC1;DPYSL3;DSTN;DUSP6;EFNB2;EHD2;EHD4;ELK3;EMCN;EMP1;ENG;ERG;ESAM;FBLN2;FGD5;FILIP1;FILIP1L;FKBP1A;FLT1;FXYD6;GJA1;GJA5;GM13889;GNAI2;G…
AIZARANI_LIVER_C1_NK_NKT_CELLS_1	4.07565	4.81815	5.3553	-2.79495	-4.00243	0	0	0	0	0	ADGRE5;ADGRG1;AKNA;ARHGAP25;ARHGAP30;ARHGAP45;ARHGAP9;ARHGDIB;ARL4C;ATM;BCL11B;BTG1;CBLB;CD2;CD247;CD3G;CD44;CD48;CD53;CD7;CD8A;CD8B1;CLEC2H;CTSW;CYFIP2;CYTIP;DENND2D;DUSP2;ETS1;EVL;FCMR;FLNA;FYB;FYN;GZMA;GZMB;HCST;IKZF1;IKZF2;KLRD1;KLRK1;LCK;LCP1;LNPEP;LYST;MBP;NKG7;NLRC5;PARP8;PDE7A;PIK3IP1;PIK3R1;PIP4K2A;PPP1R18;PRDM1;PRKACB;PRKCB;PRKCQ;PTP4A2;PTPN22;PTPRC;RBM38;RGS1;RUNX3;SASH3;SEMA4D;SH3BGRL…	ADGRE5;ADGRG1;AKNA;ALOX5AP;ARHGAP25;ARHGAP30;ARHGAP45;ARHGAP9;ARHGDIB;ARL4C;ATM;BCL11B;BIN2;BTG1;CBLB;CCR5;CD2;CD247;CD3E;CD3G;CD44;CD48;CD53;CD7;CD8A;CD8B1;CELF2;CORO1A;CTSW;CXCR4;CXCR6;CYFIP2;CYTIP;DUSP2;EMB;ETS1;EVL;FCMR;FLNA;FYB;FYN;GCSAM;GZMA;GZMB;IKZF1;IKZF2;IKZF3;IL2RB;IPCEF1;ISG20;ITGAL;ITGB2;KLRD1;KLRK1;LCK;LCP1;LNPEP;LYST;MBP;MLLT6;NKG7;PARP8;PDE7A;PIK3IP1;PIP4K2A;PPP1R18;PRDM1;PRF1;PRK…	ADGRE5;ADGRG1;AKNA;ALOX5AP;ARHGAP25;ARHGAP30;ARHGAP45;ARHGAP9;ARHGDIB;ARL4C;ATM;BCL11B;BTG1;CBLB;CCR5;CD2;CD247;CD3E;CD3G;CD44;CD48;CD53;CD7;CD8A;CLEC2H;CORO1A;CTSW;CXCR4;CXCR6;CYFIP2;CYTIP;DUSP2;EMB;ETS1;EVL;FCMR;FLNA;FYB;FYN;GCSAM;GZMA;GZMB;HCST;IKZF1;IKZF2;IKZF3;IL2RB;IPCEF1;ISG20;ITGAL;ITGB2;KLRD1;KLRK1;LCK;LCP1;LNPEP;LYST;MBP;MLLT6;NKG7;PARP8;PDE7A;PIK3IP1;PIK3R1;PIP4K2A;PPP1R18;PRDM1;PRKCB;…	ADGRG1;AKNA;ALOX5AP;ARHGAP25;ARHGAP30;ARHGDIB;ARL4C;B2M;BIN2;CBLB;CCR5;CD53;CD8A;CELF2;CORO1A;CTSW;CXCR4;CXCR6;CYFIP2;CYTIP;EMB;FYB;GM36028;GZMB;HOPX;IKZF1;IKZF2;IKZF3;IL2RB;IPCEF1;ISG20;ITGAL;ITGB2;KLRK1;LCK;MBP;PARP8;PIK3IP1;PIP4K2A;PPP2R5C;PRDM1;PRF1;PRKCB;PRKCH;PTPN22;PTPRC;RAC2;RASAL3;RGS1;RPL27A;SEMA4D;SH3BGRL3;SH3KBP1;SLA;SLAMF7;STK4;TNFRSF1B;WIPF1;ZFP36L2	ADGRE5;ADGRG1;AKNA;ALOX5AP;ARHGAP25;ARHGAP30;ARHGAP45;ARHGAP9;ARHGDIB;ARL4C;BIN2;BTG1;CCR5;CD44;CD53;CORO1A;CXCR4;CYFIP2;ETS1;EVL;FLNA;FYB;FYN;GZMA;GZMB;IKZF1;IL2RB;ISG20;ITGAL;ITGB2;KLRK1;LCK;MBP;PARP8;PIP4K2A;PPP1R18;PRKCH;PRKCQ;PTPN22;PTPRC;RAC2;RPL27A;SASH3;SEMA4D;SH3BGRL3;SH3KBP1;SLA;SLC38A1;SLFN5;STK10;TMC8;WIPF1
AIZARANI_LIVER_C25_KUPFFER_CELLS_4	2.9726	5.41622	5.39675	-2.95781	-4.0455	0	0	0	0	0	AHR;AIF1;ANXA1;AP1S2;ARRB2;ATP1B3;ATP2B1;BASP1;CCDC88A;CD55;CD83;CD86;CIITA;COTL1;CSF1R;CTSS;CXCL16;CYBB;FCER1G;FCGR3;FGD4;FGL2;FLT3;GNA13;GPR183;GZMB;H2-AB1;H2-DMA;H2-EB2;HBEGF;HCLS1;HERPUD1;I830077J02RIK;ICOSL;IER3;IFI205;IGSF6;IL1B;IL1RN;IRF4;IRF8;ITGAX;JARID2;KCTD12;KDM6B;KLF4;KLHL6;LAPTM5;LIMS1;MAFB;MAP3K8;METRNL;MIS18BP1;NAMPT;NPC2;NR4A3;PABPC1;PLAUR;PLD4;PLEK;PMAIP1;PPT1;PSAP;PSTPIP2;RAB31…	AIF1;ANXA1;AP1S2;ARRB2;BASP1;C5AR1;CCDC88A;CD83;CD86;CIITA;CLEC10A;CLN8;COTL1;CTSS;CXCL16;CXCR4;CYBB;FCER1G;FCGR3;FGL2;FLT3;GPAT3;GPR183;GRN;GZMB;H2-AB1;H2-DMA;H2-DMB1;H2-EB2;H2-OA;HBEGF;HCK;HCLS1;I830077J02RIK;ICOSL;IER3;IFI205;IGSF6;IL1RN;IRF4;IRF8;ITGAX;ITGB2;KCTD12;KLHL6;LAPTM5;LIMS1;LST1;MAP3K8;METRNL;MIS18BP1;MPEG1;MS4A7;NAMPT;NCF2;NLRP3;NR4A2;NR4A3;PHACTR1;PLAUR;PLD4;PLEK;PMAIP1;POU2F2;PPT…	AHR;AIF1;ANXA1;AP1S2;ARRB2;ATP2B1;ATP6V1B2;BASP1;C5AR1;CCDC88A;CD83;CD86;CIITA;CLEC10A;CLEC4E;CLN8;COTL1;CTSS;CXCL16;CXCR4;CYBB;EREG;FCER1G;FCGR3;FGL2;FLT3;GNA13;GPAT3;GPR183;GRN;GZMB;H2-AB1;H2-DMA;H2-DMB1;H2-EB2;H2-OA;HBEGF;HCK;HCLS1;I830077J02RIK;ICOSL;IER3;IFI205;IGSF6;IL1RN;IRF4;IRF8;ITGAX;ITGB2;KCTD12;KDM6B;KLF4;KLHL6;LAPTM5;LIMS1;MAP3K8;METRNL;MIS18BP1;MPEG1;MS4A7;NAMPT;NCF2;NLRP3;NPC2;NR4A…	ACTB;ATP6V1B2;BASP1;C5AR1;CD83;CELF2;CIITA;CLN8;CNTRL;CTSS;CXCL16;CXCR4;CYBB;DDX21;EMILIN2;FGL2;FGR;FLT3;GPAT3;GPR183;GPX1;GRN;GZMB;H2-AB1;H2-DMA;H2-DMB1;HBEGF;HCK;HCLS1;ICOSL;IER3;IFI205;IL13RA1;IRAK3;IRF8;ITGAX;ITGB2;LAPTM5;LITAF;LRRFIP1;LST1;MIS18BP1;MPEG1;MS4A7;NCF2;NLRP3;NR4A2;PHACTR1;PLAUR;PLD4;PLEK;POU2F2;PTPRE;REL;RGS1;RGS2;RILPL2;RNASE6;RNF144B;S100A11;SAMHD1;SAMSN1;SELL;SGK1;SLC11A1;SLC…	ACTB;AHR;AIF1;ANXA1;AP1S2;ARRB2;ATP6V1B2;BASP1;CCDC88A;CD55;CD83;CD86;COTL1;CSF1R;CXCR4;CYBB;FCER1G;FCGR3;FGL2;FGR;FPR1;GPAT3;GZMB;HCK;HCLS1;ICOSL;IER3;IFI205;IGSF6;IL1RN;IRF8;ITGB2;JARID2;KCTD12;KDM6B;KLF4;KLHL6;LAPTM5;LIMS1;LST1;LYN;MAP3K8;METRNL;MIS18BP1;NAMPT;NCF2;NPC2;PABPC4;PLD4;PLEK;POU2F2;PPT1;PSTPIP2;RAB31;REL;RNASE6;RNF144B;S100A11;SAMHD1;SELL;SGK1;SLC11A1;SLC15A3;SRGN;STK17B;SYK;TET2;T…
AIZARANI_LIVER_C2_KUPFFER_CELLS_1	3.2094	5.99597	5.44522	-2.71268	-4.76511	0	0	0	0	0	AHR;AIF1;ALOX5;ANXA1;AP1S2;ARPC1B;ARRB2;ATP1B3;AXL;BASP1;C1QA;C1QB;C1QC;CALHM6;CCDC88A;CD83;CD84;CD86;CIITA;COTL1;CPM;CSF1R;CTSB;CTSS;CXCL16;CYBB;DPYSL2;FCER1G;FCGR3;FCGR4;FGD2;FGL2;GPR183;GPR34;H2-AB1;H2-DMA;H2-DMB1;H2-EB2;HCLS1;HERPUD1;I830077J02RIK;IER3;IER5;IFI205;IFNGR1;IGSF6;IL18;IL1B;IRF8;ITGAX;JARID2;KCTD12;KLF4;KLHL6;LAPTM5;LGALS1;LIMS1;LIPA;LPCAT2;LY86;LYN;MAFB;MAP3K8;MFSD1;MIS18BP1;MRC…	AIF1;ANXA1;AP1S2;ARPC1B;ARRB2;AXL;BASP1;C1QA;C1QB;C1QC;C3AR1;C5AR1;CCDC88A;CD37;CD83;CD84;CD86;CIITA;CLEC10A;COTL1;CPM;CTSS;CXCL16;CYBB;DPYSL2;FCER1G;FCGR3;FGD2;FGL2;GPR183;GPR34;GRN;H2-AB1;H2-DMA;H2-DMB1;H2-EB2;H2-OA;HCK;HCLS1;I830077J02RIK;IER3;IER5;IFI205;IFNGR1;IGSF6;IRF8;ITGAX;ITGB2;KCTD12;KLHL6;LAPTM5;LGALS1;LIMS1;LPCAT2;LST1;LY86;MAP3K8;MIS18BP1;MPEG1;MS4A4D;MS4A6D;MS4A7;NAP1L1;NCF2;NLRP3;…	AIF1;ANXA1;AP1S2;ARPC1B;ARRB2;AXL;BASP1;C1QA;C1QB;C1QC;C3AR1;C5AR1;CCDC88A;CD37;CD83;CD84;CD86;CIITA;CLEC10A;CLEC4E;COTL1;CPM;CTSS;CXCL16;CYBB;DPYSL2;FCER1G;FCGR3;FGD2;FGL2;GPR183;GPR34;H2-AB1;H2-DMA;H2-DMB1;H2-EB2;H2-OA;HCK;HCLS1;I830077J02RIK;IER3;IER5;IFI205;IFNGR1;IGSF6;IRF8;ITGAX;ITGB2;KCTD12;KLF4;KLHL6;LAPTM5;LGALS1;LIMS1;LPCAT2;LY86;MAP3K8;MIS18BP1;MS4A4D;MS4A6D;MS4A7;NAP1L1;NCF2;NLRP3;NR4…	BASP1;C1QA;C1QC;C3AR1;C5AR1;CD37;CD83;CD84;CELF2;CIITA;CTSS;CXCL16;CYBB;EMILIN2;F13A1;FGD2;FGL2;FGR;GPR183;GRN;H2-AB1;H2-DMA;H2-DMB1;HCK;HCLS1;IER3;IER5;IFI205;IL13RA1;IRF8;ITGAX;ITGB2;LAPTM5;LPCAT2;LRRC25;LST1;LY86;MPEG1;MS4A4D;MS4A6D;MS4A7;NCF2;NLRP3;PARVG;PHACTR1;PLAUR;PLD4;PLEK;PLXDC2;POU2F2;PTAFR;PTPRE;RBPJ;REL;RGS1;RGS10;RGS2;RILPL2;RNASE6;RNF144B;ROCK1;RTN1;S100A11;SGK1;SLC15A3;TBXAS1;TLR2…	AIF1;ANXA1;AP1S2;ARPC1B;ARRB2;ATP6V1B2;AXL;BASP1;C1QA;C1QB;C1QC;CCDC88A;CD37;CD83;CD84;CD86;COTL1;CPM;CSF1R;CTSB;CTSH;CYBB;FABP5;FCER1G;FCGR3;FGD2;FGL2;FGR;FPR1;HCK;HCLS1;IER3;IER5;IFI205;IFNGR1;IGSF6;IRF8;ITGB2;JARID2;KCTD12;KLF4;KLHL6;LAPTM5;LIMS1;LIPA;LPCAT2;LRRC25;LST1;LY86;MAP3K8;MIS18BP1;MRC1;MSR1;NCF2;NPC2;P2RY13;PARVG;PKM;PLD4;PLEK;PLEKHO1;PLXDC2;POU2F2;PPT1;PSTPIP2;PTAFR;RAB31;REL;RGS10;…
AIZARANI_LIVER_C21_STELLATE_CELLS_1	4.78213	6.57799	7.0333	-2.98034	-4.35534	0	0	0	0	0	ACTA2;ACTN1;ADAMTS2;AEBP1;ANK3;ANTXR1;ARID5B;ATN1;BGN;CAV1;CAVIN1;CAVIN3;CCBE1;CCDC3;CCDC80;CCNI;CD63;CDC42EP3;COL14A1;COL1A1;COL1A2;COL3A1;COL4A1;COL4A2;COL5A1;COL6A1;COL6A2;COL6A3;COLEC11;CRYAB;CSRP1;CTDSPL;CYBRD1;DCN;DDR2;DPYSL2;EDNRB;EFEMP1;EMP1;FBLN1;FBLN2;FBLN5;FBN1;FHL1;FILIP1L;FOS;FSTL1;GPC6;GPX3;GSN;H2-EB2;HGF;IGFBP3;IGFBP5;IGFBP7;INMT;ITGA8;ITGA9;ITGB1;ITGB5;KLF4;LAMB1;LAMC1;LGALS1;LGAL…	ACTA2;ACTN1;ADAMTS1;ADAMTS2;ADAMTSL2;AEBP1;ALDH1A7;ANK3;ANTXR1;ATN1;BGN;BMYC;BTG2;C7;CALD1;CAV1;CAVIN1;CAVIN3;CCBE1;CCDC3;CCDC80;CCL2;CD63;CDC42EP3;CDKN1A;CEBPD;COL14A1;COL1A1;COL1A2;COL3A1;COL4A1;COL4A2;COL5A1;COL6A1;COL6A2;COL6A3;CPXM2;CRISPLD2;CRYAB;CSRP1;CTDSPL;DCN;DDR2;DKK3;DPT;DPYSL2;DYNLL1;EDNRB;EFEMP1;EGR1;EMP1;ENG;FBLN1;FBLN2;FBLN5;FBN1;FILIP1L;FOS;FSTL1;GEM;GGT5;GM13889;GPC6;GPX3;GSN;H2…	ACTA2;ACTN1;ADAMTS1;ADAMTS2;ADAMTSL2;AEBP1;ALDH1A7;ANK3;ANTXR1;ATN1;BGN;BMYC;BTG2;C1QTNF1;C7;CAV1;CAVIN1;CAVIN3;CCBE1;CCDC3;CCDC80;CCL2;CD63;CDC42EP3;CDKN1A;CEBPD;COL14A1;COL1A1;COL1A2;COL3A1;COL4A1;COL4A2;COL5A1;COL6A1;COL6A2;COL6A3;COLEC11;CPXM2;CRISPLD2;CRYAB;CSRP1;CTDSPL;DCN;DDR2;DKK3;DPT;DPYSL2;DYNLL1;EDNRB;EFEMP1;EGR1;EMP1;ENG;FBLN1;FBLN2;FBLN5;FBN1;FHL1;FILIP1L;FOS;FSTL1;GEM;GGT5;GM13889;G…	ADAMTS1;ADAMTS2;ADAMTSL2;ALDH1A7;ANTXR1;BGN;BMYC;BTG2;C7;CALD1;CCDC3;CCDC80;CCL2;CD63;CDC42EP3;CDKN1A;CEBPD;COL6A1;COL6A2;COL6A3;CPXM2;CRISPLD2;CSRNP1;CSRP1;DDR2;DKK3;DPT;DYNLL1;EGR1;EMP1;FBLN1;FBLN2;GEM;GGT5;GM13889;GPX3;GSN;HSPB1;IER3;ITGA8;JUNB;KAZN;LAMC3;LMNA;LUM;MAP1B;MFAP4;MMP2;MXRA7;MYH10;NR2F1;OLFML3;PCDH9;PDGFRA;PRELP;PRSS23;PTGDS;QSOX1;RBMS3;RBP1;RBPMS;RGS2;RRAS;SFRP1;SLIT3;SOCS3;SSPN;T…	ACTA2;ACTN1;ADAMTS1;ADAMTS2;AEBP1;AGTR1A;ANTXR1;C1QTNF1;CAVIN1;CAVIN3;CCBE1;CCDC80;CD63;CDC42EP3;CDKN1A;COL14A1;COL1A1;COL1A2;COL3A1;COL4A1;COL4A2;COL5A1;COL6A1;COL6A2;COL6A3;COLEC11;CSRP1;EDNRB;EGR1;EMP1;ENG;FBLN1;FBLN2;FBLN5;FBN1;FHL1;FILIP1L;FSTL1;GM13889;GPC6;IER3;IGFBP3;IGFBP5;IGFBP7;INMT;ITGA8;ITGA9;ITM2C;KAZN;KLF4;LAMB1;LAMC1;LTBP4;LUM;MARCKS;MATN2;MFAP4;MGP;MMP2;MYADM;MYL9;NEXN;NR2F1;OLFM…

## Sheet: SuppTable11b
Supplemental Table 11b: ORA for Transcription Factor Targets (TFT) using Aizarani hepatocyte core genes for M liver 5mo TBT HR over Veh (Supp Figure 7c)
Gene Set Enrichment Analysis (GSEA) performed using MSigDB C3 Transcription Factor Targets (TFT) genesets (v7.5.1)
GeneSet	-log10(pValue) 5moHR.over.VEH_Union.of.Aizarani.Hepatocyte_coreGenes_302.ALL_genes	Overlapping gene count 5moHR.over.VEH_Union.of.Aizarani.Hepatocyte_coreGenes_302.ALL_genes	Overlapping genes 5moHR.over.VEH_Union.of.Aizarani.Hepatocyte_coreGenes_302.ALL_genes
NR1H4_TARGET_GENES	18.005	27	ECHDC2;AGXT;MPST;NOS1AP;SERPINC1;TDO2;EFNA1;KNG1;CYB5A;LEAP2;AGT;SLC27A5;CFB;RBP4;SELENOO;C3;GCGR;GCKR;AMBP;FTCD;CPB2;ITIH3;SLC10A1;HRG;CYP2E1;SLC35E3;PHYH
HNF1_Q6	12.288	20	AFM;GJB1;PLG;GC;HGFAC;APOM;HPN;SLC39A14;AQP9;F2;ANGPTL3;LIPC;ERRFI1;MTTP;C8A;FGB;FGA;CFI;CYP2E1;HAO1
HMG20B_TARGET_GENES	11.731	48	SERPINA11;FGG;POLR2J;RCL1;ADH4;COL27A1;ECHDC2;APOA2;ASGR2;LONP2;SLC13A5;BCO2;PLG;APOC3;RGN;SCP2;SERPINF1;HPX;APOA1;APOA5;RBBP5;FAH;HPD;EFNA1;KNG1;AZGP1;HPN;MAVS;AGT;HAAO;RBP4;GNE;BCL6;HAL;ARHGEF10L;F2;LBP;C3;ONECUT2;COMMD2;AMBP;GAMT;FBXO21;CPB2;STAT3;CMBL;FGA;ID2
HHEX_TARGET_GENES	11.054	34	SERPINA11;RCL1;ADH4;APOA2;ASGR2;IDH1;SLC13A5;APOC3;PLG;RGN;SERPINF1;ALDH6A1;APOA1;VTN;EFNA1;LEAP2;PIPOX;C2;HPN;AGT;TTR;SLC27A5;HAL;DCXR;F2;TENT5A;AMBP;C8A;LYRM7;APOF;STAT3;CMBL;FGA;HRG
HNF1_01	10.765	18	GC;HGFAC;APCS;FGA;AFM;LECT2;SLC39A14;APOM;PLG;LEAP2;A1CF;HPN;ERRFI1;CFI;CYP2E1;LIPC;CHRD;HAO1
ZSCAN2_TARGET_GENES	8.274	28	SERPINA11;APOA2;LONP2;APOC3;RGN;RHOBTB3;APOA1;VTN;FGL1;RBBP5;EFNA1;CYB5A;HPN;AGT;APOH;CFB;HP;HAL;FABP1;F2;C3;MSMO1;SRD5A1;AMBP;C8A;FGA;SLC35E3;ASGR1
TATAAA_TATA_01	7.845	33	ANGPTL4;AFM;ABCA1;GLUD1;PPP2R1B;SLC27A2;GJB1;C6;BCO2;NOS1AP;TDO2;APOA5;SLC38A4;LEAP2;A1CF;AGT;RBP4;STEAP4;HMGCS2;BCL6;FABP1;ALDH4A1;BNIP3;TENT5A;IGFBP4;FN1;C8A;LECT2;ORM2;CYP2E1;CPEB4;ID2;CYP1A2
RGTTAMWNATT_HNF1_01	6.777	9	GC;HGFAC;APOM;PLG;TTR;AGT;CFI;LIPC;SERPING1
HNF1_C	6.777	14	GC;APCS;FGA;C8A;FGB;F2;AFM;AQP9;APOM;A1CF;GJB1;ERRFI1;SLC39A14;RBP4
HNF4_Q6	5.431	13	GLYAT;MTTP;GAMT;DNAJC22;C8A;C9;PIPOX;ERBB3;PROX1;ABCA6;SLC39A14;ID2;CFB
LCORL_TARGET_GENES	5.097	16	SERPINA11;FN1;SAA4;RCL1;ADH4;ARHGEF10L;HGD;F12;PROZ;PIPOX;ERBB3;C2;HPN;FGA;CFI;MLXIPL
TGTTTGY_HNF3_Q6	4.817	20	DNAJC22;F9;ITIH1;SERPINF1;A1BG;FGL1;SLC25A16;EFNA1;SLC38A4;CCDC30;MGST1;CFB;BCL6;FABP1;ERBB3;ERRFI1;ULK1;OAT;FGA;ID2
TGGAAA_NFAT_Q4_01	4.16	33	PRG4;VEGFA;COL27A1;F9;PPP2R1B;TRMT9B;HPX;SERPINC1;FGL1;APOM;A1CF;BAAT;MREG;DNAJA1;TMBIM6;BCL6;SDC4;RUNDC1;TENT5A;ERBB3;COLEC12;ERRFI1;SLC25A13;HSD11B1;FN1;PPARA;SPP2;STAT3;LRP6;HDHD3;ITIH3;CPEB4;ID2
CEBPB_02	3.918	11	PRG4;SERPINF1;BCL6;STEAP4;FGB;AQP9;STAT3;UGP2;FGA;ONECUT2;ASGR1
HNF4ALPHA_Q6	3.87	11	PRG4;MTTP;PPARA;DNAJC22;CFI;F12;LEAP2;PIPOX;ERBB3;TTR;MREG
AACTTT_UNKNOWN	3.838	32	EPHX2;PPP1R3B;VEGFA;COL27A1;ECHDC2;TRMT9B;CAMK1D;GC;ALDH6A1;SERPINC1;ID2;LEAP2;CFHR1;MGST1;MREG;DNAJA1;TNFAIP8L1;SERPING1;STEAP4;BCL6;SDC4;PROX1;COLEC12;GHR;ONECUT2;STAT3;LRP6;UGP2;SLC10A1;NADK2;CRP;HAO1
TGACCTY_ERR1_Q2	3.733	22	FGG;VEGFA;GLUD1;ADCY1;HPX;SERPINC1;NIPSNAP1;PIPOX;HPN;MREG;HP;BCL6;F2;BNIP3;ERRFI1;SLC25A13;OAT;SLC31A1;RANBP10;MTTP;ACAT1;UGP2
ZNF92_TARGET_GENES	3.532	26	COL27A1;ECHDC2;ALDH7A1;ALDH8A1;ADCY1;HGFAC;FAH;HPD;NIPSNAP1;PTK6;HPN;TNFAIP8L1;SDC4;ARHGEF10L;C3;ERBB3;SGSM1;CHRD;GAMT;FBXO21;MYO1B;QDPR;IL1RAP;CPEB4;ACY1;PHYH
TGCCAAR_NF1_Q6	3.379	17	BCL6;SLC38A4;APOC4;TENT5A;STAT3;H6PD;APOA2;PIPOX;RBP4;PROX1;COLEC12;ADCY1;HPN;GHR;CPEB4;RGN;AQP9
HNF4_01_B	3.379	10	PRG4;SERPINC1;PPARA;DNAJC22;LEAP2;PIPOX;GLUD1;PROX1;MREG;PON1
COUP_01	3.29	10	SERPINC1;ALDH6A1;MTTP;VEGFA;APOM;ASGR2;CFHR1;HPN;MREG;PON1
CEBPB_01	3.283	10	ACAA2;ECHDC2;AKR1D1;F9;C3;ABCA6;ERRFI1;MREG;RGN;ASGR1
HES2_TARGET_GENES	3.227	25	PRG4;HGD;RCL1;IDH1;NNMT;BCO2;RHOBTB3;F7;FGL1;RBBP5;EFNA1;CYB5A;MTHFD1;CFB;RBP4;BCL6;HAL;LBP;PTP4A1;C3;HSD11B1;STAT3;IL1RAP;MTO1;FGA
TTCYNRGAA_STAT5B_01	3.139	11	STEAP4;BCL6;A1BG;FN1;MTTP;VTN;AGT;F9;PROX1;FGA;SERPING1
TTANTCA_UNKNOWN	2.945	19	DNAJC22;VEGFA;TRMT9B;HGFAC;GC;TTR;AQP9;SELENOO;HAL;SDC4;PROX1;ERRFI1;ULK1;SLC25A13;PON1;MTTP;MYO1B;FGA;CPEB4
SNRNP70_TARGET_GENES	2.696	19	NDUFV3;YIF1B;ECHDC2;ANGPTL4;HLF;GNMT;NOS1AP;FGL1;PIPOX;HAAO;MLXIPL;FABP1;DCXR;APOE;GCKR;ERRFI1;ACADVL;MSMO1;MPV17L
PPAR_DR1_Q2	2.636	9	HMGCS2;MTTP;FABP1;RCL1;F12;A1CF;SLC25A13;MREG;ACADVL
HNF4_DR1_Q3	2.614	9	MTTP;FABP1;DNAJC22;SHMT1;F12;PIPOX;ERBB3;TTR;SOD1
HNF4_01	2.557	9	PRG4;SERPINF1;PPARA;F2;NIPSNAP1;APOM;LEAP2;ERBB3;MREG
FOXP2_TARGET_GENES	2.439	28	VEGFA;RCL1;AK3;PROZ;FBXO31;IDH1;SLC25A16;EFNA1;DESI1;GNE;TTC38;BCL6;HAL;ERBB3;PROX1;OAT;HSD11B1;NADK2;PPARA;GAMT;FBXO21;MYO1B;QDPR;ACSL1;CYP2E1;GRHPR;GMEB1;ACY1
BCL6B_TARGET_GENES	2.437	7	GNE;BCL6;RETREG1;HELB;LONP2;AASS;TMBIM6
TFCP2_TARGET_GENES	2.437	5	PTP4A1;SIN3B;NADK2;TMBIM6;PHYH
TBX3_TARGET_GENES	2.437	10	SERPINA11;HAL;RCL1;LYRM7;EFNA1;ASGR2;UGP2;C2;PIPOX;RGN
ZNF7_TARGET_GENES	2.426	17	ADH4;C8A;ABAT;ECHDC2;STAT3;H6PD;ACADSB;FBXO31;C2;GCKR;IL1RAP;APOA2;SORD;IGFBP4;HAAO;ID2;TNFAIP8L1
RTAAACA_FREAC2_01	2.275	17	RETREG1;MTTP;RCL1;ALDH4A1;ABCA1;APOA2;ACSL1;PROX1;A1CF;COLEC12;HPN;ULK1;SHROOM1;CAMK1D;ID2;TRMT9B;HSD11B1
PAX6_TARGET_GENES	2.225	15	GC;MTTP;FABP1;HGD;RBBP5;ABAT;STAT3;GPAM;UGP2;CPS1;FBXO22;LONP2;GMEB1;AASS;MLXIPL
UBP1_TARGET_GENES	2.192	27	GRHPR;VEGFA;UQCRQ;IDH1;CPEB4;GNMT;RBBP5;EFNA1;ACAD11;EMC10;GPAM;FBXO22;TST;TNFAIP8L1;DCXR;GTPBP10;ERBB3;GHR;GFOD2;MYO1B;LYRM7;F12;STAT3;CYP2E1;NADK2;ACY1;PHYH
WTGAAAT_UNKNOWN	2.169	13	C8B;FN1;TUBD1;MAT1A;ACADSB;PIPOX;GLUD1;NNMT;HPN;ERRFI1;SLC25A13;CPS1;HSD11B1
COUP_DR1_Q6	2.169	8	HMGCS2;MTTP;FABP1;F12;APOM;PIPOX;TTR;MREG
CTTTGA_LEF1_Q2	2.169	20	DNAJC22;CYP2E1;GLUD1;SLC13A5;VNN1;SERPINC1;ALDH6A1;EMC10;A1CF;CFB;BCL6;HAL;PROX1;CPS1;HSD11B1;RANBP10;ABHD15;SORD;C9;COL18A1
TATA_01	2.169	8	ERRFI1;PTP4A1;BNIP3;ABCA1;LEAP2;AGT;TTR;CYP1A2
STAT5A_01	2.162	8	STEAP4;BCL6;MTTP;VTN;F9;FGA;SERPING1;SOD1
STAT_01	2.162	8	BCL6;FN1;VTN;AGT;F9;FGA;SERPING1;SOD1
DR1_Q3	2.117	8	HMGCS2;MTTP;F12;BNIP3;PIPOX;A1CF;MREG;SOD1
ZBED5_TARGET_GENES	2.056	17	ALDH2;FABP1;POLR2J;MLXIPL;APOF;HPD;MST1;GTPBP10;LRP6;APOA2;ACAT1;HLF;ERRFI1;CYP2E1;ID2;TMBIM6;OAT
CEBP_Q2_01	2.051	8	BCL6;MTTP;F9;ASGR2;FGA;MREG;TMBIM6;ASGR1
PITX1_TARGET_GENES	1.969	9	LYRM7;AK3;TUBD1;ACADSB;MTHFD1;ERBB3;FBXO22;DESI1;SLC35E3
TGGNNNNNNKCCAR_UNKNOWN	1.896	10	SLC22A1;PPARA;VEGFA;FGL1;SPP2;F9;HPN;CFI;RGN;CYP1A2
DLX6_TARGET_GENES	1.866	12	ALDH2;RETREG1;TDO2;PDP2;MTTP;RBBP5;EFNA1;UQCRQ;GPAM;CMBL;CPEB4;SRD5A1
ZNF391_TARGET_GENES	1.866	16	ALDH6A1;PPP1R3B;GAMT;SDC4;VEGFA;RBBP5;FTCD;STAT3;APOM;LRP6;GLUD1;PROX1;PNPLA3;SGSM1;CPEB4;DNAJA1
CBX7_TARGET_GENES	1.837	16	COMMD2;MTTP;DPYS;DNAJC22;SHMT1;ANGPTL4;SDC2;APOM;GPAM;TLCD2;HLF;C9;CYP27A1;GMEB1;CHRD;SOD1
LMO2COM_02	1.703	7	BCL6;ARHGEF10L;ECHDC2;PTP4A1;CAMK1D;CPEB4;ID2
CEBPDELTA_Q6	1.69	7	SERPINF1;ECHDC2;PIPOX;NNMT;GJB1;CPS1;CFB
S8_01	1.69	7	PRG4;ARHGEF10L;STAT3;ACADSB;PIPOX;SLC39A14;ONECUT2
ZNF257_TARGET_GENES	1.65	11	PDP2;NDUFV3;RBBP5;ECHDC2;EMC10;QSOX1;ERBB3;PROX1;RALGAPA2;TMBIM6;SCP2
SRSF9_TARGET_GENES	1.65	15	RHOBTB3;ACACB;AMBP;FN1;GLYAT;ANGPTL4;PTP4A1;TUBD1;IDH1;SLC25A13;C6;CYP27A1;APOH;TMBIM6;MLXIPL
STAT5B_01	1.635	7	BCL6;MTTP;VTN;F9;FGA;SERPING1;SOD1
BRCA2_TARGET_GENES	1.627	20	RCL1;NDUFV3;PDE4DIP;UQCRQ;IDH1;TLCD2;SOD1;SHROOM1;SLC25A16;PIPOX;SLC27A5;DNAJA1;CFB;BCL6;ALDH4A1;GHR;RANBP10;MAT1A;MTO1;CPEB4
HMGB1_TARGET_GENES	1.622	21	HGD;VEGFA;HLF;RHOBTB3;ZHX3;C2;TST;ARHGEF10L;ECHS1;COLEC12;GHR;ONECUT2;ADGRA3;SH3PXD2A;PPARA;GAMT;FBXO21;MYO1B;QDPR;QSOX1;NADK2
BARX2_TARGET_GENES	1.612	23	PDP2;MST1;APOA2;IDH1;ACAA2;SCP2;ALDH6A1;RBBP5;AKR1D1;CCDC30;CYB5A;MTHFD1;DESI1;TMBIM6;ALDH4A1;AASS;MSMO1;LYRM7;STAT3;LRP6;UGP2;CAT;CPEB4
GATA6_01	1.551	7	BCL6;MTTP;ARHGEF10L;ECHDC2;LECT2;ERRFI1;SLC39A14
RBM34_TARGET_GENES	1.551	16	PPARA;DCXR;FBXO21;NDUFV3;SHMT1;RUNDC1;AK3;STAT3;PHYH;QSOX1;ACAT1;GLUD1;PROX1;SLC25A13;OAT;MLXIPL
CACGTG_MYC_Q2	1.545	16	RHOBTB3;BCL6;ALDH6A1;PPP1R3B;PDP2;RCL1;APOA5;SHMT1;SLC17A9;AK3;ABCA1;STAT3;SORD;MTHFD1;CPEB4;ACY1
MYCMAX_B	1.529	7	SERPINF1;PDP2;VEGFA;RCL1;AK3;NADK2;ACY1
KAT2A_TARGET_GENES	1.525	17	COMMD2;ID2;SDC4;VEGFA;NDUFV3;RBBP5;ALDH7A1;STAT3;FBXO31;SRD5A1;PIPOX;FBXO22;ERRFI1;SLC27A5;DNAJA1;SLC31A1;RANBP10
CRX_Q4	1.524	7	ECHDC2;PNPLA3;ACADVL;CPEB4;ID2;CFB;ACAA2
ZNF781_TARGET_GENES	1.502	6	DHTKD1;GC;SDC4;SLC25A16;MTO1;ITIH3
ZNF423_TARGET_GENES	1.499	16	SERPINF1;TTC38;RETREG1;PPP1R3B;SDC4;F12;SDC2;FBXO31;PTK6;IDH1;PIPOX;RALGAPA2;TRMT9B;CYP2E1;PNPLA3;ACAA2
TOP2B_TARGET_GENES	1.474	11	COMMD2;MTTP;DCXR;RBBP5;ECHDC2;CYB5A;ACAT1;IDH1;MTO1;ACAA2;ADGRA3
ZNF577_TARGET_GENES	1.474	10	DHTKD1;VTN;SDC4;RBBP5;SLC25A16;ACAD11;FBXO31;PIPOX;MTO1;SRD5A1
FOX_Q2	1.474	6	PRG4;FABP1;EFNA1;ERRFI1;TTR;CPEB4
DACH1_TARGET_GENES	1.474	15	RHOBTB3;FN1;POLR2J;DCXR;RBBP5;TENT5A;STAT3;SRD5A1;GPAM;MTO1;SIN3B;SLC25A13;CPEB4;ID2;MLXIPL
F10_TARGET_GENES	1.474	7	RHOBTB3;COMMD2;MYO1B;RBBP5;SDC2;STAT3;AASS
ZNF512_TARGET_GENES	1.474	9	BCL6;GLYAT;FAH;ANGPTL4;SDC2;H6PD;UGP2;ID2;SOD1
ZNF2_TARGET_GENES	1.466	17	COMMD2;ID2;SLC25A16;EFNA1;GTPBP10;BNIP3;FTCD;ACADSB;IL1RAP;ERBB3;MTO1;PROX1;CMBL;GPAM;GHR;PNPLA3;SLC31A1
PAX7_TARGET_GENES	1.45	12	ARHGEF10L;RBBP5;SDC2;TUBD1;PIPOX;GLUD1;NNMT;LIPC;MGST1;SLC39A14;TMBIM6;AQP9
CDP_01	1.443	4	TTR;GC;PIPOX;MYO1B
FREAC4_01	1.443	5	COLEC12;ULK1;CAMK1D;ID2;SLC31A1
SUPT16H_TARGET_GENES	1.443	24	TLCD2;NNMT;PLG;PTPN3;HGFAC;VTN;PPP6R2;RBBP5;EFNA1;PIPOX;C2;BHMT;CFB;TMBIM6;SDC4;BNIP3;SLC25A13;FN1;STAT3;HDHD3;UGP2;CPEB4;PNPLA3;ASGR1
RORA2_01	1.425	5	STEAP4;ABAT;ABCA1;A1CF;ONECUT2
HNF3B_01	1.425	6	ERRFI1;TTR;CPEB4;ID2;ONECUT2;RBP4
TAATTA_CHX10_01	1.422	13	SERPINC1;BCL6;MYO1B;ARHGEF10L;C8A;EFNA1;STAT3;ACADSB;LIPC;CPEB4;CDO1;ID2;ONECUT2
CREB3L4_TARGET_GENES	1.422	19	GRHPR;ZKSCAN1;UQCRQ;ACAA2;SCP2;ALDH6A1;EMC10;CYB5A;MTHFD1;LEAP2;GPAM;DCXR;OAT;MSMO1;STAT3;UGP2;ACSL1;SLC35E3;ID2
ZNF10_TARGET_GENES	1.414	13	PPP1R3B;F12;AKR1D1;TUBD1;H6PD;LRP6;ACADSB;TLCD2;CAT;MGST1;C9;CPEB4;GMEB1
AR_01	1.411	5	PRG4;BCL6;KLF15;HPD;ID2
SOX3_TARGET_GENES	1.399	10	FBXO21;RBBP5;PTP4A1;SDC2;MTHFD1;PIPOX;NNMT;CPEB4;AASS;TMBIM6
KLF7_TARGET_GENES	1.387	14	GNE;VTN;YIF1B;STAT3;APOM;LRP6;MTHFD1;ERBB3;ACADSB;PIPOX;SIN3B;CPEB4;TMBIM6;ACAA2
LEF1_Q2	1.387	6	SERPINC1;GLUD1;PROX1;A1CF;CYP2E1;HSD11B1
SFMBT1_TARGET_GENES	1.353	21	NDUFV3;IDH1;ACAA2;PPP6R2;EFNA1;SLC39A14;MLXIPL;RBP4;DCXR;PTP4A1;ERBB3;LRG1;SGSM1;SRD5A1;COMMD2;LRP6;IL1RAP;QSOX1;CAT;CYP2E1;ID2
ARP1_01	1.347	5	SERPINC1;APOM;A1CF;CFI;CYP2E1
MAFG_TARGET_GENES	1.335	23	EPHX2;HGD;ADH4;ALDH1L1;RHOBTB3;HPX;HELB;FAH;TTR;BCL6;RETREG1;SLC2A2;IGFBP4;OAT;ONECUT2;APOC1;AMBP;FN1;PPARA;LYRM7;FTCD;ACAT1;CPEB4
FOXD2_TARGET_GENES	1.321	17	ACAA2;VEGFA;DCXR;INSIG1;OAT;MST1;AK3;TUBD1;FBXO31;ACSL1;LONP2;DESI1;GRHPR;PNPLA3;ONECUT2;TMBIM6;MSMO1
