# Supplementary material for: Plasticity of Epigenomic and Transcriptomic Aging Reveals Common Targets for Reprogramming by Environmental Exposures
Source: Research Square preprint supplement (doi:10.21203/rs.3.rs-7368222/v1), 2025-09-19
Supplement: Supplementary file 3 [file 2cfc3ee0141b9bc98d836102.xlsx]

## Sheet: SuppTable3a
Supplemental Table 3a: Promoter-region LAAsP-mods linked to LAAsP genes from '5mo Adult Veh over 3wk Weanling Veh' comparison (Figure 4c)
Number of peaks for each histone mark near DEGs (TSS +/-3kb)
Genes	Peak count for H3K27ac up peaks	Peak count for H3K4me1 up peaks	Peak count for H3K4me3 up peaks	Peak count for H3K27me3 down peaks	M liver LAAsP genes (3wk to 5mo)	Peak count for H3K27ac down peaks	Peak count for H3K4me1 down peaks	Peak count for H3K4me3 down peaks	Peak count for H3K27me3 up peaks
MUP7	0	0	0	0	12.1869	0	0	0	0
MUP11	1	0	0	0	11.0994	0	0	0	0
MUP14	0	0	0	0	11.0128	0	0	0	0
MOXD1	0	0	1	1	10.9795	0	0	0	0
MUP17	0	0	0	0	10.7085	0	0	0	0
MUP15	0	0	0	0	10.1628	0	0	0	0
MUP1	0	0	0	0	9.84936	0	0	0	0
MUP9	0	0	0	0	9.22637	0	0	0	0
MUP12	0	0	0	0	9.07603	0	0	0	0
MUP16	1	0	1	0	8.51152	0	0	0	0
MUP21	1	0	0	0	8.13185	0	0	0	0
CYP4A12A	0	0	0	0	7.93263	0	0	0	0
CYP4A12B	0	0	0	0	7.86739	0	0	0	0
MUP18	0	0	0	0	7.65373	0	0	0	0
MUP20	1	0	0	0	7.51704	0	0	0	0
ELOVL3	1	0	2	0	7.49924	0	0	0	0
NAT8F5	1	2	0	0	7.29761	0	0	0	0
MUP8	0	0	0	0	6.91891	0	0	0	0
GM4756	1	0	0	0	6.72987	0	0	0	0
SAA2	1	0	0	0	6.27771	0	0	0	0
NAT8	1	0	0	0	6.25231	0	0	0	0
CYP7B1	1	2	1	0	6.03049	0	0	0	0
SLC22A28	0	2	0	0	5.93377	0	0	0	0
CAPN8	1	0	1	0	5.62863	0	0	0	0
GRM8	1	0	1	1	5.60213	0	0	0	0
TRHDE	1	1	1	1	5.57063	0	0	0	0
NOX4	1	1	1	0	5.41624	0	0	0	0
UGT2B38	0	1	0	0	5.41389	0	0	0	0
SLC15A5	1	1	1	0	5.20703	0	0	0	0
SCARA5	1	1	1	0	5.18106	0	0	0	0
SAA1	1	0	0	0	5.16277	0	0	0	0
TIAM2	0	0	0	1	4.64222	0	0	0	0
C6	1	2	1	0	4.60682	0	0	0	0
LAD1	1	1	1	1	4.57881	0	0	0	0
HSPB1	1	0	1	0	4.55337	0	0	0	0
AR	1	0	1	0	4.52087	0	0	0	0
SLC10A2	1	1	1	0	4.50913	0	0	0	0
ORM2	2	0	0	0	4.40438	0	0	0	0
SERPINA12	0	0	0	0	4.39961	0	0	0	0
HSD3B5	0	0	0	0	4.16039	0	0	0	0
MUP3	1	0	2	0	3.98306	0	0	0	0
SUSD4	1	0	0	0	3.82214	0	0	0	0
SLCO1A1	1	1	1	0	3.73599	0	0	0	0
OMD	1	1	1	0	3.65507	0	0	0	0
GM3839	1	1	1	0	3.54501	0	0	0	0
LRP2	0	0	0	0	3.37236	0	0	1	0
CES1F	1	1	1	0	3.31313	0	0	0	0
SRD5A1	1	0	1	0	3.3051	0	0	1	0
SERPINE2	1	0	0	1	3.19489	0	0	0	0
LRIT2	0	0	0	0	3.16946	0	0	0	0
PIGR	1	0	1	0	3.10762	0	0	0	0
CLSTN3	0	0	0	0	3.0749	0	0	0	0
WFDC21	0	1	1	0	3.07343	0	1	0	0
CYP2C38	0	1	1	0	3.06834	0	0	0	0
CYP2C67	1	1	2	0	2.89588	0	0	0	0
SYTL1	1	2	1	0	2.88201	0	0	0	0
SRGAP3	1	1	1	0	2.87699	0	0	0	0
GPC1	1	0	0	1	2.86531	0	0	0	0
CNMD	0	0	1	0	2.86096	0	0	0	0
HAMP	1	1	1	0	2.85534	0	0	0	0
DCT	0	0	0	0	2.85129	0	0	0	0
SLC41A2	1	0	0	0	2.82554	0	0	0	0
SERPINA1E	2	0	1	0	2.75051	0	1	0	0
CADM4	1	0	0	0	2.68478	0	0	0	0
C9	1	0	1	0	2.66739	0	0	0	0
CES3B	1	1	1	0	2.66468	0	0	0	0
CEBPE	0	0	0	0	2.65382	0	0	0	0
ORM1	1	2	1	0	2.63005	0	1	0	0
GM14327	1	0	1	0	2.61284	0	0	0	0
OSBPL3	0	0	0	0	2.60804	0	0	0	0
CES2C	1	0	0	0	2.5985	0	0	0	0
PLEKHB1	0	0	0	0	2.5826	0	0	0	0
GSTP1	1	0	1	0	2.55649	0	0	0	0
UGT3A1	0	0	0	0	2.55485	0	0	0	0
NPR2	1	0	0	0	2.54022	0	0	0	0
MAPK15	1	0	1	1	2.51897	0	0	0	0
CIDEC	0	0	1	0	2.48368	0	0	0	0
ZFP982	0	0	0	0	2.46455	0	0	0	0
SYT3	1	0	0	0	2.4577	0	0	0	0
ACPP	1	0	1	0	2.43769	0	0	0	0
CYP2D9	1	0	1	0	2.43717	0	0	0	0
FITM1	1	0	1	0	2.4129	0	0	0	0
ATP11A	1	0	0	1	2.36622	0	0	0	0
GSTP2	2	0	0	0	2.34321	0	0	0	0
9130409I23RIK	0	0	0	0	2.32524	0	0	0	0
OLIG1	1	0	0	0	2.32456	0	0	0	0
CYP26A1	1	0	0	0	2.28504	0	0	0	0
S1PR5	2	0	1	0	2.28346	0	0	0	0
LAMA3	0	0	0	0	2.26475	0	0	0	0
NNMT	0	1	1	0	2.20651	0	0	0	0
LCN2	0	0	0	0	2.20293	0	0	0	0
DISP2	0	0	1	0	2.18089	0	0	0	0
OLFM3	0	0	0	0	2.15712	0	0	0	0
SLC22A30	1	0	1	0	2.15525	0	0	0	0
SLC3A1	1	1	1	0	2.15221	0	0	0	0
TREH	2	1	1	0	2.14762	0	0	0	0
MFSD2A	0	0	1	0	2.13991	0	0	0	0
AATK	0	0	0	0	2.10895	0	0	0	0
CYP2U1	1	1	1	0	2.10658	0	0	0	0
ZAP70	0	0	1	0	2.09198	0	0	0	0
ETFBKMT	1	2	1	0	2.08527	0	0	0	0
MME	0	0	0	0	2.08377	0	0	0	0
SULT2A7	0	1	0	0	2.03757	0	0	0	0
KCTD15	1	0	0	0	2.01841	0	0	1	0
CABYR	0	0	0	0	2.00613	0	0	0	0
MCM10	0	0	0	0	1.98924	0	0	0	0
CIB3	1	2	0	0	1.97647	0	0	0	0
ZFP809	1	2	1	0	1.97247	0	0	0	0
KEG1	0	0	0	0	1.96655	1	0	0	0
DPY19L3	0	0	0	0	1.95703	0	0	0	0
NAT8F2	1	0	1	0	1.95401	0	0	0	0
ACOT11	0	0	1	0	1.94929	0	0	0	0
SAA3	0	0	0	0	1.9339	0	0	0	0
JCHAIN	0	0	0	0	1.92864	0	0	0	0
ALDH1A1	0	0	0	0	1.92428	0	0	0	0
UNC13B	1	0	0	0	1.91578	0	0	1	0
LAG3	0	0	0	0	1.91216	0	0	0	0
SUCNR1	1	1	0	0	1.90974	0	0	0	0
AOX1	1	0	1	0	1.89414	0	0	0	0
LRG1	0	0	0	0	1.88832	0	0	0	0
LDHD	2	0	1	0	1.88285	0	0	0	0
PROCA1	0	0	1	0	1.88217	0	0	0	0
DNTT	0	0	0	0	1.87081	0	0	0	0
APOL9A	1	1	1	0	1.85334	0	0	0	0
CDC42EP5	1	0	1	0	1.85174	0	0	0	0
2010003K11RIK	0	0	1	0	1.84855	0	0	0	0
ORM3	1	1	1	0	1.8466	0	0	0	0
SLC2A5	0	0	0	0	1.83856	0	0	0	0
AOX3	1	1	1	0	1.82647	0	0	0	0
ZFP970	1	0	0	0	1.82571	0	0	0	0
THEM7	1	0	1	0	1.82226	1	0	0	0
SLC16A13	0	0	1	0	1.81759	0	1	0	0
CAR3	1	0	0	0	1.81145	0	0	0	0
GSTA2	1	1	1	0	1.81126	0	0	0	0
BLNK	0	0	1	0	1.80763	0	0	0	0
CXCL1	1	0	1	0	1.7798	0	0	0	0
UGDH	0	0	0	0	1.77943	0	0	0	0
DERL3	0	0	0	0	1.77147	0	0	0	0
CHPT1	2	1	0	0	1.75209	0	0	0	0
CSAD	1	0	1	0	1.75203	0	0	0	0
EXTL1	0	0	0	0	1.74293	0	0	0	0
RARRES1	1	0	0	0	1.68877	0	0	1	0
GGT6	1	0	1	0	1.68461	0	0	0	0
B4GALNT3	0	0	0	0	1.68237	0	0	1	0
CNTNAP1	0	0	0	0	1.67589	0	0	0	0
OAT	1	0	1	0	1.67355	0	0	0	0
SPSB4	0	0	0	1	1.67142	0	0	0	0
UGT2B1	0	0	0	0	1.65821	0	0	0	0
2200002D01RIK	1	0	1	0	1.64992	0	0	0	0
COL27A1	1	0	0	0	1.64929	0	0	0	0
IFI27	1	1	1	0	1.64541	0	0	0	0
G0S2	0	0	0	0	1.63445	0	0	0	0
ABCB1B	0	0	0	0	1.62432	0	0	0	0
APOA4	0	0	1	0	1.62315	0	0	0	0
CYB561	0	0	0	0	1.62258	1	0	0	0
TTBK1	0	0	0	0	1.61975	0	0	0	0
PNLDC1	0	0	0	0	1.61594	0	0	0	0
C8A	1	0	0	0	1.60728	0	0	0	0
SULT5A1	0	0	0	0	1.58352	0	0	0	0
BDH2	0	0	1	0	1.58222	0	0	0	0
NUDT7	1	0	2	0	1.58061	0	0	0	0
HAPLN4	0	0	1	1	1.57892	0	0	0	0
SELENBP2	0	0	0	0	1.56726	0	0	0	0
SDR9C7	0	0	1	0	1.56483	0	0	0	0
RAET1E	1	0	1	1	1.54578	0	0	0	0
NRG4	1	0	0	0	1.53984	0	0	0	0
MTNR1A	1	0	1	0	1.53514	0	0	0	0
FAM47E	0	0	0	0	1.5334	0	0	0	0
CRYBG2	1	0	1	0	1.52134	0	0	0	0
CES1E	1	0	1	0	1.5167	0	0	0	0
ADH4	2	1	1	0	1.5164	0	0	0	0
PLK3	0	0	1	0	1.50084	0	0	0	0
SERINC2	1	0	0	0	1.48606	0	0	0	0
SMYD1	0	0	0	0	1.477	0	0	0	0
KCNK10	0	0	0	1	1.47133	0	0	0	0
CES3A	1	0	1	0	1.46904	0	0	0	0
HSPA1B	0	0	1	0	1.46413	0	0	0	0
GM14403	1	0	0	0	1.45806	0	0	0	0
CAMK2N2	0	0	0	0	1.45625	0	0	0	0
CD207	0	0	0	0	1.44651	0	0	0	0
HSPH1	0	0	0	0	1.43711	0	0	0	0
UGT2A3	1	1	0	0	1.42967	0	0	0	0
LY6D	1	0	1	0	1.42037	0	0	0	0
BMYC	1	0	0	0	1.41203	0	0	0	0
SYT12	1	0	0	0	1.41044	0	0	0	0
ALAS2	1	1	0	0	1.41031	0	0	0	0
COL5A3	0	0	1	0	1.40979	0	0	0	0
CPEB1	1	0	0	0	1.40812	0	0	0	0
CIART	0	0	0	0	1.40789	0	0	0	0
ZFP992	0	0	0	0	1.40214	0	0	0	1
ATP8B4	0	0	1	0	1.39715	1	0	0	0
SNTG2	1	2	0	0	1.3895	0	0	0	0
RETSAT	1	0	1	0	1.38469	0	0	0	0
UGT2B5	0	0	0	0	1.36795	0	0	0	0
DLGAP1	1	0	0	0	1.36003	0	0	0	0
1700037H04RIK	1	0	0	0	1.35719	0	0	0	0
RFX4	0	0	0	0	1.35666	1	0	0	0
CGREF1	1	0	0	0	1.35653	0	0	0	0
OASL1	1	0	1	0	1.35406	1	0	0	0
AHCYL2	0	0	0	0	1.34812	0	0	0	0
OPLAH	0	0	0	0	1.33552	0	0	0	0
INHBE	0	0	1	0	1.3354	0	0	0	0
TIFA	1	1	1	0	1.32219	0	0	0	0
CADPS2	1	0	0	0	1.31505	0	0	0	0
NCAM2	1	0	0	0	1.31167	0	0	0	0
MGST1	0	0	1	0	1.30873	0	0	0	0
LAMB3	0	0	1	0	1.29202	0	0	0	0
ZSWIM5	1	0	0	0	1.29169	0	0	0	0
GM7694	0	0	0	0	1.28792	0	0	0	0
SLC6A16	0	0	0	0	1.28738	0	0	0	0
NEB	1	0	1	0	1.28656	0	0	0	0
APOL9B	1	2	1	0	1.27954	0	0	0	0
ADGRV1	0	0	0	0	1.27494	0	0	0	0
CCDC171	0	0	0	0	1.27247	0	0	0	0
PLIN4	0	0	1	0	1.268	0	0	0	0
SLC22A5	0	0	1	0	1.26436	0	0	0	0
RD3	0	0	0	0	1.26327	0	0	0	0
SLC35E3	0	0	0	0	1.25043	0	0	0	0
GABBR2	1	0	0	0	1.25008	0	0	0	0
TTC39C	0	0	0	0	1.24943	0	0	0	0
CAMK2B	0	0	0	1	1.24243	0	0	1	0
SCP2	1	0	0	0	1.23224	0	0	0	0
CD59B	0	0	0	0	1.22963	0	0	0	0
MYPOP	0	0	0	0	1.22501	0	0	0	0
CYP2F2	0	0	2	0	1.22461	0	0	0	0
GNAT1	0	0	1	0	1.21935	0	0	0	0
SYT11	1	0	1	0	1.21764	0	0	0	0
SCD1	0	0	0	0	1.2149	0	0	0	0
ABCG2	0	0	0	0	1.209	0	0	0	0
ADRA1A	1	0	1	0	1.19852	0	0	0	0
ARSA	1	1	2	0	1.19443	0	0	0	0
CD4	0	0	0	0	1.19402	0	0	0	0
CYP2C23	0	0	0	0	1.1939	0	0	0	0
SERPINA3K	0	0	0	0	1.19001	0	0	0	0
EPHX2	0	0	1	0	1.18204	0	0	0	0
SYVN1	0	0	0	0	1.1785	0	0	0	0
GNA14	1	0	1	0	1.17678	0	0	0	0
CYS1	0	0	0	0	1.16533	0	0	0	0
BMP7	1	0	0	0	1.16519	0	0	0	0
DHRS9	0	0	0	0	1.16479	0	0	0	0
MBNL2	0	0	0	0	1.16059	0	0	0	0
SUGCT	0	0	0	0	1.1474	0	0	0	0
S100A10	1	0	1	0	1.12984	0	0	0	0
TEDC2	0	0	0	0	1.12914	0	0	0	0
EGFR	0	0	1	0	1.1285	0	0	0	0
FBF1	0	0	0	0	1.12692	1	0	0	0
HNMT	0	0	1	0	1.1247	0	0	0	0
CHRNB2	0	0	0	0	1.11182	0	0	0	0
ALDH1A7	1	0	1	0	1.10723	0	0	0	0
REEP6	0	0	0	0	1.10134	0	0	0	0
CYP4V3	1	0	1	0	1.10132	0	0	0	0
LRIT1	0	0	0	0	1.10122	0	0	0	0
PDILT	1	0	0	0	1.10095	0	0	0	0
TMEM19	1	0	1	0	1.09821	0	0	0	0
IMPG2	0	0	0	0	1.09807	0	0	0	0
P4HA2	0	0	0	0	1.09288	0	0	1	0
LRP11	1	0	0	0	1.09188	0	0	1	0
FAM131C	0	0	0	0	1.07373	0	0	0	0
MUP2	0	0	0	0	1.07198	0	0	0	0
ZFP445	1	0	0	0	1.07082	0	0	0	0
CRELD2	0	0	0	0	1.06918	0	0	0	0
MN1	1	0	0	0	1.06715	0	0	0	0
HSP90AA1	0	0	0	0	1.06463	1	0	0	0
MEGF8	1	0	0	1	1.0604	0	0	0	0
TLR5	1	0	1	0	1.05834	0	0	0	0
CLU	0	0	1	0	1.05489	0	0	0	0
NECAB1	1	0	1	0	1.05126	0	0	0	0
PAQR7	0	0	1	0	1.0471	0	0	0	0
TMEM120B	0	0	0	0	1.04118	0	0	0	0
AKR1C19	0	0	1	0	1.04089	0	0	0	0
SOX9	1	0	0	0	1.03156	0	0	0	0
TMC7	0	0	0	0	1.02501	0	0	1	0
ERO1LB	0	0	0	0	1.02243	1	0	0	0
ANKRD33B	0	0	0	0	1.02169	0	0	0	0
COMT	0	0	0	0	1.01803	0	0	0	0
AGAP2	1	0	1	0	1.01179	0	0	0	0
NAT1	0	0	0	0	1.00902	0	0	0	0
HSPB8	0	0	1	0	1.00538	0	0	0	0
FAM53B	0	0	0	0	1.00419	0	0	0	0
CDHR5	1	1	1	0	0.999307	0	0	0	0
TSPYL4	0	0	0	0	0.996482	0	0	0	0
GJB2	0	0	1	0	0.991295	0	0	0	0
GM36028	1	0	0	0	0.990076	0	0	0	0
P2RY1	1	0	0	0	0.988563	0	0	0	0
FAM25C	1	0	0	0	0.985507	0	0	0	0
ACOX1	0	0	1	0	0.985501	0	0	0	0
SAA4	0	0	0	0	0.98061	0	0	0	0
ZC2HC1C	2	2	1	0	0.980293	0	0	0	0
CHRNA2	1	0	0	0	0.979116	0	0	0	0
DAGLB	1	0	1	0	0.97696	0	0	0	0
H2-AA	1	0	1	0	0.976555	0	0	0	0
CYP8B1	1	0	0	0	0.972766	0	0	0	0
ACOT1	1	0	0	0	0.972505	0	0	0	0
CTH	0	0	0	0	0.970513	0	0	0	0
ABCC3	1	0	1	0	0.969279	0	0	0	0
HES6	0	0	0	0	0.968553	0	0	0	0
NOCT	0	0	0	0	0.968292	0	0	1	0
BAG3	0	0	0	0	0.968012	0	0	0	0
PLA2G6	0	0	1	0	0.967388	0	0	0	0
RUSC1	0	0	0	0	0.963351	0	0	0	0
ZMAT1	0	0	0	0	0.957864	0	0	0	0
DDHD2	0	0	0	0	0.953926	0	0	0	0
GNA12	1	0	0	0	0.951876	0	0	0	0
MBD1	0	0	1	0	0.949914	0	0	0	0
LPGAT1	0	0	0	0	0.947993	0	0	0	0
MT-ND4	0	0	0	0	0.947032	0	0	0	0
ONECUT1	0	0	0	0	0.945451	0	0	0	0
PLSCR2	0	0	1	0	0.943834	0	0	0	0
INVS	0	0	0	0	0.942811	0	0	0	0
HSPA4L	0	0	0	0	0.940392	0	0	0	0
RPP40	0	0	0	0	0.938046	0	0	0	0
TLR12	0	0	1	0	0.937825	0	0	0	0
SERPING1	0	1	1	0	0.937113	0	0	0	0
PLIN2	0	0	1	0	0.936623	0	0	0	0
ALPL	0	0	0	0	0.933146	0	0	0	0
GPAT4	0	0	0	0	0.930937	0	0	0	0
GRINA	0	0	0	0	0.930743	0	0	0	0
MVP	1	0	0	0	0.928917	0	0	0	0
ACAA1B	0	0	0	0	0.927007	0	0	0	0
CPSF4L	0	0	1	0	0.92418	0	0	0	0
TTC7B	0	0	0	0	0.923903	0	0	0	0
CPEB2	0	0	0	0	0.923891	0	0	1	0
SOCS3	1	0	1	0	0.917582	0	0	0	0
LGALS8	1	0	0	0	0.916482	0	0	0	0
ENPP3	1	0	2	0	0.913639	0	0	0	0
DPY19L1	0	0	0	0	0.909131	0	0	0	0
SLC22A4	0	0	0	0	0.908937	0	0	0	0
TMEM102	0	0	1	1	0.907318	0	0	0	0
CELSR1	1	0	0	1	0.90556	0	0	0	0
PGAP1	1	0	0	0	0.904177	0	0	0	0
DDC	0	0	0	0	0.901897	0	0	0	0
MTMR7	1	0	0	0	0.901182	0	0	0	0
SMPD3	0	0	0	0	0.899358	0	0	0	0
PEX11A	0	0	0	0	0.895613	0	0	0	0
SLC6A9	0	0	0	0	0.893135	1	0	0	0
PARP3	0	0	1	0	0.890875	0	0	0	0
CYP2J5	0	0	0	0	0.889766	0	0	0	0
CPT2	0	0	1	0	0.887354	0	0	0	0
IDO2	0	0	1	0	0.887061	0	0	0	0
STEAP4	0	0	0	0	0.886018	0	0	0	0
SLCO2B1	0	0	0	0	0.885259	0	0	0	0
EFEMP1	0	0	1	0	0.884219	0	1	0	0
PCSK4	0	0	0	0	0.884216	0	0	0	0
TMEM120A	1	0	0	0	0.880974	0	0	0	0
VMO1	0	0	0	0	0.879764	0	0	0	0
EPHX1	2	0	1	0	0.874837	0	0	0	0
ALPK1	1	0	1	0	0.869756	0	0	0	0
FMO5	0	0	0	0	0.868025	0	0	0	0
EFCAB2	0	0	0	0	0.867778	0	0	0	0
MIGA2	0	0	0	0	0.862733	0	0	0	0
SPRYD7	0	0	0	0	0.861022	0	0	0	0
MMP15	1	0	1	0	0.858086	0	0	1	0
CYP2D40	0	0	1	0	0.855601	0	0	0	0
GAS2	0	0	0	0	0.854997	0	0	0	0
PTK2B	0	0	0	0	0.850872	0	0	0	0
SLC1A2	0	0	0	1	0.847661	0	0	1	0
PRAF2	0	0	0	0	0.846954	0	0	0	0
SSC4D	0	0	0	0	0.846051	0	0	0	0
CARMIL1	0	0	0	0	0.844792	0	0	1	0
CLCN2	0	0	0	0	0.842553	0	0	0	0
ID2	1	0	1	0	0.842153	0	1	0	0
SULT2A8	0	0	0	0	0.841573	0	0	0	0
TDO2	0	0	0	0	0.840095	0	0	0	0
MAPRE3	1	0	0	0	0.838916	0	0	0	0
TSC22D1	0	0	0	0	0.837545	0	0	1	0
SCNN1A	0	0	0	0	0.835289	0	0	0	0
ENPP6	0	0	0	0	0.833615	0	0	0	0
GLYAT	0	0	0	0	0.83309	0	0	0	0
PIM3	0	0	1	0	0.833069	0	0	1	0
LENG9	0	0	0	0	0.831138	0	0	0	0
H2-EB1	1	0	1	0	0.826405	0	0	0	0
SEC22C	0	0	0	0	0.826101	0	0	1	0
SLC38A4	0	0	0	0	0.82417	0	0	1	0
ELMOD3	1	0	1	0	0.823171	0	0	0	0
ETHE1	0	0	0	0	0.82283	0	0	0	0
NOS1AP	0	0	0	0	0.822427	0	0	0	0
ADCYAP1R1	1	0	1	0	0.819772	0	0	0	0
MPV17L	0	0	0	0	0.819511	0	0	0	0
ZBTB42	1	0	0	0	0.816625	0	0	1	0
PSEN2	0	0	0	0	0.816368	0	0	0	0
CAMK1D	0	0	0	0	0.81595	0	0	0	0
PMM1	0	0	0	0	0.815881	0	0	0	0
SRR	0	0	0	0	0.815787	0	0	0	0
SPIN1	1	2	0	0	0.815293	0	0	0	0
HS3ST6	1	0	0	0	0.813472	0	0	1	0
CMTM4	0	0	0	0	0.809178	0	0	1	0
C8B	1	0	1	0	0.806565	0	0	0	0
TMEM79	0	0	0	0	0.80517	0	0	0	0
ATG16L2	1	0	1	0	0.804608	0	0	0	0
B2M	0	0	0	0	0.803207	0	0	0	0
TAF4B	1	0	0	0	0.803157	0	0	0	0
PLCXD2	0	0	1	0	0.802813	0	0	0	0
GNAI1	0	0	0	0	0.798141	0	0	1	0
LAMC3	1	0	1	0	0.798024	0	0	0	0
UBC	0	0	0	0	0.797448	0	0	0	0
CALR3	0	0	0	0	0.797242	0	0	0	0
MAP3K5	0	0	0	0	0.796835	0	0	0	0
CD74	1	0	1	0	0.795169	0	0	0	0
TSKU	0	0	0	0	0.794761	0	0	0	0
VNN1	0	0	1	0	0.794647	0	0	0	0
KMO	0	0	0	0	0.792267	0	0	0	0
GPCPD1	0	0	0	0	0.790131	0	0	0	0
CCPG1OS	0	0	0	0	0.790041	0	0	0	0
AMN1	1	1	0	0	0.789833	0	0	0	0
NR1D1	0	0	1	0	0.78887	0	0	0	0
PRTN3	0	0	1	0	0.786831	0	0	0	0
CCDC151	0	0	0	0	0.783428	0	0	0	0
CYP27A1	0	0	0	0	0.782852	0	0	0	0
SKAP2	0	1	0	0	0.777978	0	0	0	0
FGFR1	1	0	1	0	0.777243	0	0	0	0
IL1B	0	0	1	0	0.776572	0	0	0	0
GBP2B	0	0	0	0	0.776009	0	0	0	0
SLC41A1	1	0	1	0	0.773661	0	0	0	0
AADAT	0	0	0	0	0.770441	0	0	0	0
HC	1	0	0	0	0.770071	0	0	0	0
MPEG1	1	1	1	0	0.769559	0	0	0	0
TTC39B	0	0	0	0	0.768787	0	0	0	0
MKNK2	0	0	0	0	0.768416	0	0	0	0
ATOH8	1	0	1	0	0.768137	0	0	0	0
ENTPD5	0	0	0	0	0.767672	0	0	0	0
AIFM3	0	0	0	0	0.767316	0	0	0	0
PPL	1	0	0	0	0.767175	0	0	0	0
LAP3	0	0	0	0	0.766439	0	0	0	0
CYB5D2	0	0	0	0	0.76318	0	0	0	0
NAA80	0	0	0	0	0.762908	0	0	0	0
AARS	0	0	1	0	0.760742	0	0	0	0
ANKRD9	1	0	0	0	0.759579	0	0	0	0
FOXA1	0	0	0	0	0.758654	0	0	0	0
ONECUT2	0	0	0	0	0.758341	0	0	0	0
DMXL2	0	0	0	0	0.75818	0	0	0	0
AK4	0	0	0	0	0.757154	0	0	0	0
SOS1	0	0	0	0	0.75682	0	0	1	0
DBP	1	0	0	0	0.756579	0	0	0	0
ARL15	0	0	0	0	0.756508	0	0	0	0
SHTN1	1	0	0	0	0.756073	0	0	0	0
GAS7	0	0	0	0	0.755764	0	0	1	0
ADAM11	1	0	0	0	0.75567	0	0	0	0
H2-AB1	1	0	0	0	0.753599	0	0	0	0
GDE1	0	0	0	0	0.752572	0	0	0	0
MARVELD3	0	0	1	0	0.752511	0	0	0	0
H2-K1	0	0	0	0	0.752358	0	0	0	0
UGT2B37	0	1	0	0	0.751687	0	0	0	0
TGOLN1	0	0	1	0	0.748066	0	0	0	0
MOCOS	0	0	0	0	0.746341	1	0	0	0
FH1	0	0	0	0	0.745526	0	0	0	0
PRKCZ	1	0	0	0	0.745233	0	0	0	0
ZFPM1	0	0	0	0	0.745096	0	0	0	0
IFI27L2B	1	0	0	0	0.744779	0	0	0	0
HOPX	0	0	0	0	0.744008	0	0	0	0
GM14325	0	0	0	0	0.741814	0	0	0	0
SLC7A2	0	0	0	0	0.741642	0	0	0	0
SEL1L3	1	0	0	0	0.740464	0	0	0	0
PLTP	0	0	0	0	0.740167	0	0	0	0
HYOU1	0	0	0	0	0.739879	0	0	0	0
UBD	0	1	0	0	0.739392	0	0	1	0
CYP2C54	0	1	0	0	0.737891	0	0	0	0
DNAJA4	0	0	0	0	0.737531	0	0	1	0
GPR155	1	1	0	0	0.737329	0	0	0	0
P2RY2	0	0	1	0	0.736811	0	0	0	0
ZBTB20	0	0	0	0	0.736589	0	0	0	0
ACP5	0	0	1	0	0.732755	0	0	0	0
POLB	0	0	0	0	0.732017	0	0	0	0
GALNT15	1	0	1	0	0.730559	0	0	0	0
RAET1D	0	0	0	0	0.730531	0	0	0	0
PRSS53	0	0	0	0	0.728541	0	0	0	0
ZFP595	0	0	0	0	0.728398	0	0	0	0
LACTB2	0	0	0	0	0.726825	0	0	0	0
CREM	0	0	0	0	0.726457	0	0	0	0
TXNDC15	0	0	0	0	0.725309	0	0	0	0
CAR1	0	0	0	0	0.725165	0	0	0	0
RBM47	1	0	1	0	0.72496	0	0	0	0
A2ML1	0	0	0	0	0.722565	0	0	0	0
ZFP493	0	0	0	0	0.722293	0	0	0	0
REXO2	0	0	0	0	0.718329	0	0	0	0
KYNU	1	0	0	0	0.716884	0	0	0	0
DNAJB2	0	0	0	0	0.714787	0	0	0	0
USP2	0	0	0	0	0.711779	0	0	0	0
CMAH	1	0	1	0	0.710805	0	0	0	0
LY6A	1	0	1	0	0.709706	0	0	0	0
FYB2	0	0	1	0	0.708799	0	0	0	0
BMP6	1	0	0	0	0.708794	0	0	0	0
ISCU	0	0	0	0	0.707723	0	0	0	0
SERPINA1C	0	0	0	0	0.70571	0	0	0	0
ARL6IP1	0	0	0	0	0.702767	0	0	0	0
PHYH	0	1	0	0	0.699903	0	0	0	0
RAI2	1	0	0	0	0.698652	0	0	0	0
SLC25A22	0	0	0	0	0.698258	0	0	0	0
RNF186	0	0	1	0	0.697081	0	0	0	0
1810024B03RIK	0	0	0	0	0.695178	0	0	0	0
LDAH	1	1	0	0	0.695152	0	0	0	0
DOP1B	0	0	0	0	0.693872	0	0	0	0
RASSF5	1	0	0	0	0.693075	0	0	0	0
PLCXD1	1	0	0	0	0.691982	0	0	0	0
FMN1	0	0	0	0	0.690387	0	0	0	0
WFS1	0	0	0	0	0.689799	0	0	0	0
POGK	0	0	0	0	0.687275	0	0	0	0
HYKK	0	0	0	0	0.686838	0	0	0	0
ETNK1	0	0	0	0	0.686444	0	0	0	0
PMS1	0	0	0	0	0.686191	0	0	0	0
UHMK1	0	0	0	0	0.682209	0	0	1	0
CCDC157	0	0	0	0	0.682156	0	0	0	0
UOX	0	0	0	0	0.67945	0	0	0	0
RAP2A	0	0	0	0	0.678851	0	0	0	0
HABP4	0	0	0	0	0.677818	0	0	0	0
CREG1	0	0	1	0	0.677624	0	0	0	0
ACOX3	0	0	0	0	0.672739	0	0	0	0
MT-CO1	0	0	0	0	0.66995	0	0	0	0
GLO1	0	0	0	0	0.669791	0	0	0	0
FAM102A	0	0	0	0	0.667247	0	0	0	0
CBX7	0	0	0	0	0.666402	0	0	0	0
PCSK6	0	0	0	0	0.666301	0	0	0	0
E030030I06RIK	0	0	0	1	0.662724	0	0	0	0
ZFP141	1	0	0	0	0.662097	0	0	0	0
LITAF	0	0	0	0	0.660109	1	0	0	0
MDH1	0	0	0	0	0.660027	0	0	0	0
GUK1	0	0	0	0	0.659851	0	0	0	0
GPT2	0	0	0	0	0.659709	0	0	0	0
GAS6	1	0	0	0	0.657885	0	0	0	0
TMEM189	0	0	0	0	0.657119	0	0	0	0
NEU2	0	0	0	0	0.655708	0	1	1	0
PNPO	1	0	1	0	0.655162	1	0	0	0
FAM187B	0	0	0	0	0.653446	0	0	0	0
ALDH3A2	0	0	0	0	0.652807	0	0	0	0
MUG2	0	0	0	0	0.65243	0	0	0	0
NCEH1	0	0	1	0	0.652261	0	0	0	0
ORMDL3	0	0	0	0	0.651918	0	0	0	0
PQBP1	0	0	0	0	0.651549	0	0	0	0
SAP30L	0	0	0	0	0.65056	0	0	1	0
LMAN2L	0	0	0	0	0.650235	0	0	0	0
SNRNP48	0	0	0	0	0.649188	0	0	0	0
RND1	0	0	0	0	0.649081	0	0	0	0
MEIOB	1	0	0	0	0.64788	0	0	0	0
NTN3	0	0	0	0	0.647017	0	0	0	0
CRELD1	0	0	0	0	0.646393	0	0	0	0
MT-CYTB	0	0	0	0	0.644768	0	0	0	0
PRR13	0	0	1	0	0.642658	0	0	0	0
AREL1	0	0	0	0	0.642051	0	0	0	0
FBXO36	0	0	0	0	0.641457	0	0	0	0
TMEM250-PS	0	0	0	0	0.640529	0	0	0	0
FAM214A	0	0	0	0	0.640353	0	0	0	0
ARID5B	0	0	0	0	0.640298	0	0	0	0
CDK18	0	0	0	0	0.640044	0	0	0	0
ENPP5	1	0	1	0	0.639998	0	0	0	0
SLCO2A1	0	0	1	0	0.639975	0	0	0	0
DPYD	0	0	0	0	0.639689	1	0	0	0
APON	0	0	1	0	0.636781	0	0	0	0
ZFP605	0	0	1	0	0.635168	0	0	0	0
CLIC5	0	0	0	0	0.633353	0	0	0	0
DCUN1D4	1	0	0	0	0.632942	0	0	0	0
ABCD1	0	0	0	0	0.631528	0	0	0	0
ZSWIM7	0	0	0	0	0.62951	0	0	0	0
PCMTD1	0	0	0	0	0.628918	0	0	0	0
ZFP976	0	0	0	0	0.627662	0	0	0	0
TMEM243	0	0	0	0	0.625668	0	0	1	0
COMTD1	1	0	0	0	0.625245	0	0	0	0
PARD3B	1	0	0	0	0.625019	0	0	1	0
PAQR9	0	0	1	0	0.624894	0	0	0	0
DUSP4	1	0	0	0	0.624391	0	0	0	0
STBD1	2	0	0	0	0.623714	0	0	0	0
FAM126B	0	0	0	0	0.623577	0	0	0	0
RGS3	0	0	0	0	0.62242	0	0	0	0
KCTD21	1	0	0	0	0.620659	0	0	0	0
ADGRA3	0	0	0	0	0.619877	0	0	0	0
TRIM65	0	0	0	0	0.619618	0	0	0	0
WWC1	1	0	0	0	0.618228	0	0	0	0
RIDA	0	0	0	0	0.618157	0	0	0	0
BRAP	0	0	1	0	0.617982	0	0	0	0
HSPB6	0	0	0	0	0.617659	0	0	0	0
AZGP1	0	0	0	0	0.617168	0	0	0	0
PI4K2B	0	0	0	0	0.616512	0	0	1	0
DYM	0	0	0	0	0.615819	0	0	1	0
TAT	0	0	1	0	0.615072	0	0	0	0
HP	0	0	0	0	0.614671	0	0	0	0
AP3M1	0	0	0	0	0.614514	0	0	0	0
CIPC	0	0	0	0	0.61444	0	0	0	0
SLC38A3	0	0	1	0	0.613227	0	0	0	0
CRYL1	0	0	0	0	0.613139	0	0	0	0
TCEA3	0	0	0	0	0.612849	0	0	0	0
ZNRF1	0	0	0	0	0.61203	0	0	0	0
NSUN2	0	0	0	0	0.611312	0	0	1	0
DNAJA1	0	0	0	0	0.611128	0	0	1	0
JPH1	0	0	0	0	0.608407	0	0	0	0
TSPAN8	0	0	0	0	0.607387	0	0	0	0
UGT3A2	0	0	1	0	0.606976	0	0	0	0
C4B	0	0	1	0	0.604437	0	0	0	0
CELF2	0	0	0	0	0.603902	0	0	0	0
DNMBP	0	0	0	0	0.603594	0	0	0	0
PLEKHG6	0	0	0	0	0.603102	0	0	0	0
FAM8A1	0	0	0	0	0.600275	0	0	1	0
C1GALT1C1	0	0	0	0	0.600195	0	0	0	0
FBXW4	0	0	0	0	0.600174	0	0	1	0
CYB5B	1	0	1	0	0.600059	0	0	0	0
CHORDC1	0	0	0	0	0.599481	0	0	0	0
BACH1	0	0	0	0	0.59832	0	0	0	0
SGK2	0	0	1	0	0.598228	0	0	0	0
GULP1	0	0	0	0	0.59819	0	0	0	0
AHSA2	0	0	0	0	0.597776	0	0	1	0
TNK2	0	0	0	0	0.597569	0	0	1	0
IRF2	0	0	0	0	0.592998	0	0	0	0
ATP9A	0	0	0	0	0.592792	0	0	1	0
SOX13	0	0	0	0	0.592438	0	0	0	0
WDPCP	0	0	0	0	0.59239	0	0	0	0
AGTPBP1	0	0	0	0	0.591595	0	0	0	0
CMBL	0	0	1	0	0.590403	0	0	0	0
ARHGEF26	0	0	0	0	0.590309	0	0	0	0
PPP1R3E	1	0	0	0	0.589921	0	0	1	0
TRIP4	0	0	0	0	0.589736	0	0	0	0
PDIA5	1	0	0	0	0.589457	0	0	0	0
CRYBG3	0	0	0	0	0.588214	0	0	0	0
GAS1	1	0	0	0	0.585931	0	0	0	0
VKORC1L1	0	0	0	0	0.585345	0	0	0	0
0610012G03RIK	0	0	0	0	0	0	0	1	0
0610030E20RIK	0	0	0	0	0	0	0	1	0
0610037L13RIK	0	0	0	0	0	0	1	0	0
1110012L19RIK	0	0	1	0	0	0	0	0	0
1110032A03RIK	0	0	0	0	0	0	0	1	0
1110032F04RIK	0	0	0	0	0	0	0	1	0
1110034G24RIK	0	1	0	0	0	0	0	0	0
1110038F14RIK	0	0	1	0	0	0	0	0	0
1110051M20RIK	0	0	1	0	0	0	0	0	0
1110059E24RIK	0	0	0	0	0	0	0	1	0
1110065P20RIK	0	0	0	0	0	0	0	1	0
1190002N15RIK	0	0	0	0	0	0	0	1	0
1500009L16RIK	0	0	0	0	0	0	0	1	0
1520401A03RIK	0	0	0	0	0	0	0	1	0
1600002H07RIK	0	0	2	0	0	0	0	0	0
1600002K03RIK	0	0	1	0	0	0	0	0	0
1600014C23RIK	0	0	0	0	0	0	0	2	0
1700001O22RIK	0	0	0	0	0	0	0	1	0
1700003F12RIK	0	0	0	1	0	0	0	1	0
1700006E09RIK	0	0	0	0	0	1	0	0	0
1700008O03RIK	1	0	0	0	0	0	0	0	0
1700013D24RIK	0	0	0	0	0	1	0	0	0
1700016C15RIK	0	1	0	0	0	0	0	0	0
1700016H13RIK	0	0	0	0	0	0	0	1	0
1700020L24RIK	0	0	0	0	0	0	1	0	0
1700029I15RIK	1	0	0	0	0	0	0	0	0
1700040L02RIK	0	0	0	0	0	0	1	0	0
1700066M21RIK	0	0	0	0	0	0	0	1	0
1700067K01RIK	0	0	0	0	0	0	0	1	0
1700086D15RIK	0	0	0	0	0	0	0	1	0
1700102P08RIK	1	0	0	0	0	0	0	0	0
1700113H08RIK	0	0	0	0	0	0	1	1	0
1700123O20RIK	0	0	0	0	0	1	0	0	0
1700125H20RIK	0	0	0	0	0	1	0	0	0
1810011H11RIK	0	0	1	0	0	0	0	0	0
1810013L24RIK	0	0	0	0	0	0	0	1	0
1810030O07RIK	0	0	1	0	0	0	0	0	0
1810037I17RIK	0	0	0	0	0	0	1	0	0
1810041L15RIK	1	0	0	1	0	0	1	0	0
1810049J17RIK	0	0	0	0	0	0	0	1	0
2010109A12RIK	0	0	0	0	0	0	0	1	0
2010109I03RIK	0	0	0	0	0	1	0	0	0
2010300C02RIK	0	0	0	0	0	0	0	1	0
2210011C24RIK	0	0	0	0	0	0	0	1	0
2210016F16RIK	0	0	0	0	0	0	0	1	0
2210408I21RIK	0	0	0	0	0	0	0	1	0
2310007B03RIK	0	0	0	0	0	0	1	0	0
2310030G06RIK	0	0	0	0	0	0	1	0	0
2310034G01RIK	0	0	0	0	0	0	0	1	0
2310061I04RIK	0	0	0	0	0	1	0	1	0
2310061N02RIK	0	0	0	0	0	1	0	0	0
2410004B18RIK	0	0	0	0	0	0	0	1	0
2410137M14RIK	0	0	0	0	0	0	1	0	0
2510009E07RIK	0	0	0	0	0	0	0	1	0
2510039O18RIK	0	0	0	0	0	0	0	1	0
2610028H24RIK	0	0	0	0	0	1	0	0	0
2610507B11RIK	0	1	0	0	0	0	0	0	0
2610524H06RIK	0	0	0	0	0	1	0	0	0
2700097O09RIK	0	0	0	0	0	0	1	0	0
2810459M11RIK	1	0	0	0	0	0	0	0	0
3100002H09RIK	0	0	0	0	0	0	1	0	0
3110082J24RIK	0	0	0	0	0	1	0	1	0
4833427G06RIK	0	0	0	0	0	0	0	1	0
4930404H24RIK	0	0	0	0	0	0	0	1	0
4930412O13RIK	0	0	0	1	0	1	0	0	0
4930438A08RIK	0	0	0	0	0	0	1	0	0
4930444P10RIK	0	0	0	0	0	0	0	1	0
4930447C04RIK	0	0	0	1	0	0	0	0	0
4930518I15RIK	0	0	0	0	0	1	0	0	0
4930535I16RIK	0	0	0	0	0	0	0	1	0
4930544D05RIK	1	0	1	0	0	0	0	0	0
4930558K02RIK	0	0	0	0	0	1	0	0	0
4930562C15RIK	0	0	0	0	0	1	1	0	0
4930583I09RIK	0	0	0	0	0	1	0	0	0
4931406P16RIK	0	0	0	0	0	0	0	1	0
4931408C20RIK	0	0	0	0	0	1	0	0	1
4931440F15RIK	0	0	0	0	0	0	1	1	0
4933407L21RIK	0	0	0	0	0	1	1	0	0
4933428G20RIK	0	0	0	0	0	1	0	0	0
5430403G16RIK	0	0	1	0	0	0	0	0	0
5730507C01RIK	0	0	0	0	0	0	0	1	0
5730596B20RIK	0	0	0	1	0	0	0	0	0
6030445D17RIK	0	0	0	0	0	1	0	1	0
6030468B19RIK	0	0	0	0	0	1	0	0	0
6430573F11RIK	0	0	0	0	0	0	0	1	0
6820408C15RIK	0	0	0	0	0	0	0	1	0
8030423J24RIK	0	0	0	0	0	0	1	0	0
8030462N17RIK	0	0	0	0	0	0	0	1	0
9030612E09RIK	0	0	0	1	0	0	0	0	0
9030617O03RIK	0	0	1	0	0	0	0	0	0
9030624G23RIK	0	0	0	0	0	0	0	1	0
9130230L23RIK	0	0	0	0	0	1	0	1	0
9230102O04RIK	0	0	0	1	0	0	0	0	0
9330182L06RIK	0	0	0	0	0	0	0	1	0
9430038I01RIK	0	0	0	0	0	0	1	0	0
9530068E07RIK	0	0	0	0	0	1	0	0	0
9930021J03RIK	0	0	0	0	0	0	0	1	0
A	0	0	0	0	0	0	0	1	0
A030005K14RIK	0	0	0	0	0	1	0	0	0
A2M	0	0	0	0	0	0	0	1	0
A4GALT	0	0	0	0	0	0	1	0	0
A530084C06RIK	0	0	0	0	0	0	0	1	0
A630076J17RIK	0	0	1	0	0	0	0	0	0
A730061H03RIK	0	0	1	0	0	0	0	0	0
A830031A19RIK	0	0	0	0	0	0	0	1	0
A930004D18RIK	0	0	0	0	0	0	1	0	0
A930017K11RIK	0	0	0	0	0	0	1	1	0
AATF	0	0	0	1	0	0	0	0	0
ABCA13	0	0	0	0	0	1	0	0	0
ABCA17	0	0	0	0	0	0	1	0	0
ABCA2	0	0	0	0	0	0	0	1	0
ABCA3	0	0	0	0	0	0	1	0	0
ABCA9	0	0	0	0	0	0	1	0	0
ABCB9	0	0	0	0	0	1	1	0	0
ABCC1	0	0	0	1	0	0	0	0	0
ABCC4	0	0	0	0	0	0	0	1	0
ABCC8	0	0	0	1	0	0	0	0	0
ABCG4	0	0	0	0	0	1	0	0	0
ABHD12	0	0	0	0	0	0	0	1	0
ABHD17A	0	0	0	0	0	0	0	1	0
ABHD17B	0	0	0	0	0	0	0	1	0
ABHD5	0	0	0	0	0	0	0	1	0
ABHD6	0	0	0	0	0	1	0	0	0
ABL2	0	0	0	0	0	0	0	1	0
ABLIM1	0	0	0	0	0	0	0	1	0
ABLIM2	1	0	0	0	0	0	0	0	0
ABLIM3	1	0	0	0	0	0	0	0	0
ABR	1	0	0	0	0	0	0	1	0
ABTB2	0	0	0	0	0	0	0	1	0
AC099934	0	0	0	0	0	0	0	1	0
AC104834	0	0	0	1	0	0	0	1	0
AC133183	0	0	0	0	0	1	0	1	0
AC157931	0	0	0	0	0	0	0	1	0
AC163623	0	0	0	0	0	0	0	1	0
AC164597	0	0	0	0	0	0	1	0	0
ACACB	0	0	0	0	0	0	1	0	0
ACAD10	0	0	1	0	0	0	0	0	0
ACADM	0	0	1	0	0	0	0	0	0
ACAT2	0	0	0	0	0	0	1	0	0
ACBD3	0	0	0	0	0	1	0	0	0
ACE	0	0	0	0	0	0	0	1	0
ACIN1	0	0	0	0	0	1	0	0	0
ACO1	1	0	0	0	0	0	0	0	0
ACOT3	0	0	0	0	0	0	0	1	0
ACOT4	0	0	0	0	0	0	0	1	0
ACOT5	0	0	0	0	0	0	0	1	0
ACP1	0	0	0	0	0	0	1	0	0
ACP7	0	0	0	1	0	0	0	0	0
ACSF2	0	0	1	0	0	0	0	0	0
ACSL1	0	0	0	0	0	1	0	1	0
ACSL3	0	0	0	0	0	0	0	1	0
ACSL6	0	0	0	0	0	0	0	1	0
ACSM5	1	1	0	0	0	0	0	0	0
ACSS1	0	0	0	0	0	0	0	1	0
ACTA1	0	0	0	1	0	0	0	0	0
ACTC1	0	0	1	0	0	0	0	0	0
ACTL10	0	0	0	1	0	0	0	1	0
ACTN4	0	0	0	0	0	1	0	0	0
ACTR5	0	0	0	1	0	0	0	0	0
ACTR6	0	0	0	0	0	1	0	0	0
ACVR1	0	0	0	0	0	0	0	1	0
ACVR1B	0	0	0	0	0	0	0	1	0
ACVR1C	0	0	0	0	0	0	0	1	0
ACYP1	1	2	1	0	0	0	0	0	0
ADAD1	0	0	0	0	0	0	0	1	0
ADAD2	1	0	0	0	0	0	0	0	0
ADAM10	0	0	0	0	0	0	0	1	0
ADAM33	0	0	0	0	0	0	1	0	0
ADAMTS17	0	0	0	0	0	0	0	1	0
ADAMTS18	0	0	0	0	0	0	1	0	0
ADAMTS3	0	0	0	0	0	0	0	1	0
ADAMTS8	0	0	0	1	0	0	0	1	0
ADAMTSL1	0	0	0	0	0	0	1	1	0
ADAMTSL2	0	0	1	0	0	0	1	0	0
ADAMTSL3	1	0	0	0	0	0	0	0	0
ADAP1	1	0	0	0	0	0	0	0	0
ADAR	0	0	0	0	0	0	0	1	0
ADCK5	0	0	1	0	0	0	0	0	0
ADCY10	0	0	0	0	0	1	0	0	0
ADCY2	0	0	0	0	0	0	0	1	0
ADCY4	0	0	0	1	0	0	0	0	0
ADCY8	1	0	0	1	0	0	0	0	0
ADCY9	0	0	0	0	0	1	0	1	0
ADD1	0	0	0	0	0	0	0	1	0
ADD3	0	0	0	0	0	0	0	1	0
ADGRB1	0	0	0	1	0	0	0	0	0
ADGRB2	0	0	0	1	0	0	0	1	0
ADGRB3	0	0	0	0	0	0	0	1	0
ADGRF5	0	0	0	0	0	1	1	0	0
ADGRG2	0	0	0	0	0	0	0	1	0
ADGRG5	0	0	0	1	0	0	0	0	0
ADGRG6	0	0	0	0	0	0	0	1	0
ADGRL3	0	0	0	1	0	0	0	1	0
ADIPOQ	0	0	1	0	0	0	0	0	0
ADIPOR1	0	0	0	0	0	0	0	1	0
ADNP	0	0	0	0	0	0	0	1	0
ADO	0	0	0	0	0	0	0	1	0
ADORA2B	0	0	0	0	0	0	0	1	0
ADORA3	0	0	0	0	0	1	1	0	0
ADPGK	0	0	0	0	0	0	0	1	0
ADPRHL2	0	0	0	0	0	1	0	1	0
ADRA1D	0	0	0	1	0	0	0	1	0
ADRA2A	0	0	0	0	0	1	0	1	0
ADRA2B	0	0	0	1	0	0	0	0	0
ADRA2C	0	0	0	1	0	0	0	0	0
ADRB1	0	0	0	1	0	0	0	0	0
ADRM1	0	0	0	0	0	0	0	1	0
AEBP2	1	1	0	0	0	0	0	1	0
AF529169	0	0	0	1	0	0	0	0	0
AFDN	1	0	0	0	0	0	0	1	0
AFF2	0	0	0	0	0	0	0	1	0
AFG3L2	0	0	0	0	0	0	0	1	0
AGAP3	0	0	0	0	0	0	0	1	0
AGFG1	0	0	0	0	0	0	0	1	0
AGFG2	0	0	0	0	0	1	0	0	0
AGGF1	0	0	0	0	0	0	0	1	0
AGMAT	0	0	1	0	0	0	0	0	0
AGO2	0	0	0	0	0	0	0	1	0
AGO4	0	0	0	0	0	0	0	1	0
AGPAT2	0	0	0	0	0	1	1	0	0
AGPAT3	0	0	0	0	0	0	0	1	0
AGRN	0	0	0	0	0	0	0	1	0
AGXT2	0	1	0	0	0	0	0	0	0
AHCTF1	0	0	0	0	0	0	0	1	0
AHNAK2	0	0	0	1	0	0	0	1	0
AHR	0	0	0	0	0	0	0	1	0
AI314180	0	0	0	0	0	0	0	1	0
AI467606	0	0	1	0	0	0	1	0	0
AI593442	0	0	0	0	0	0	0	1	0
AI606181	0	0	0	0	0	0	1	0	0
AI846148	0	0	0	0	0	0	0	1	0
AI854703	0	0	1	0	0	0	0	1	0
AI987944	0	1	0	0	0	0	0	0	0
AICDA	0	0	0	0	0	1	0	0	0
AIDA	0	0	0	0	0	1	0	0	0
AIF1L	0	0	0	1	0	0	0	1	0
AK2	0	0	2	0	0	0	0	0	0
AK5	0	0	0	0	0	1	1	1	0
AKAP8L	0	0	0	0	0	1	0	0	0
AKIRIN1	0	0	0	0	0	0	0	1	0
AKIRIN2	0	0	0	0	0	0	0	1	0
AKR1B3	1	0	0	0	0	0	0	0	0
AKT1	1	0	0	0	0	0	0	2	0
ALB	0	0	0	0	0	1	0	0	0
ALDH1A2	0	0	0	1	0	0	0	0	0
ALDH1A3	0	0	0	1	0	0	0	0	0
ALDH3A1	0	0	0	0	0	0	1	0	0
ALDH3B2	0	0	0	0	0	0	1	0	0
ALDH3B3	0	0	0	0	0	1	1	0	0
ALDH5A1	0	0	0	0	0	0	0	1	0
ALDOA	0	0	0	0	0	2	0	0	0
ALG8	0	0	0	0	0	1	0	0	0
ALG9	0	0	0	0	0	0	0	1	0
ALK	0	0	0	0	0	0	0	1	0
ALKAL2	0	0	0	0	0	0	1	0	0
ALKBH2	1	0	0	0	0	0	0	0	0
ALKBH6	0	0	1	0	0	0	0	0	0
ALKBH8	0	0	0	0	0	1	0	0	0
ALOX12	0	0	1	0	0	0	0	0	0
ALS2	0	0	0	0	0	1	0	0	0
ALX1	0	0	0	1	0	0	0	0	0
ALX3	0	0	0	1	0	0	0	1	0
ALX4	0	0	0	1	0	0	0	1	0
AMBP	0	0	2	0	0	0	0	0	0
AMBRA1	0	0	0	0	0	0	0	1	0
AMD1	0	0	0	0	0	0	0	1	0
AMER3	0	0	0	0	0	0	0	1	0
AMFR	0	0	0	0	0	0	0	1	0
AMIGO1	0	0	0	0	0	0	0	1	0
AMIGO2	0	0	0	0	0	0	0	1	0
AMN	0	0	0	1	0	0	0	1	0
AMY1	0	0	0	0	0	0	1	0	0
ANAPC11	0	0	0	0	0	0	0	1	0
ANAPC15-PS	0	0	0	0	0	1	0	0	0
ANGPTL1	0	0	0	0	0	1	0	0	0
ANK1	0	0	0	1	0	0	0	1	0
ANK3	0	0	0	0	0	0	0	1	0
ANKHD1	0	0	0	0	0	0	0	1	0
ANKLE2	0	0	0	0	0	0	0	1	0
ANKMY1	1	0	0	0	0	0	0	0	0
ANKRD11	0	0	0	0	0	0	0	1	0
ANKRD12	0	0	0	0	0	0	0	1	0
ANKRD13A	0	0	0	0	0	0	0	2	0
ANKRD13C	0	0	0	0	0	0	0	1	0
ANKRD22	0	0	0	0	0	0	1	0	0
ANKRD27	0	0	0	1	0	0	0	0	0
ANKRD28	0	0	0	0	0	0	0	1	0
ANKRD31	0	0	1	0	0	0	0	0	0
ANKRD34A	0	0	0	1	0	0	0	0	0
ANKRD34B	0	0	0	0	0	1	0	1	0
ANKRD46	0	0	1	0	0	0	0	1	0
ANKRD52	0	0	0	0	0	0	0	1	0
ANKRD54	0	0	0	0	0	0	0	1	0
ANKRD6	0	0	0	0	0	0	0	1	0
ANKRD60	0	0	0	0	0	0	0	1	0
ANKRD63	0	0	0	1	0	0	0	1	0
ANKRD65	0	0	0	0	0	0	1	0	0
ANKS1	0	0	0	0	0	0	0	1	0
ANKS1B	0	0	0	0	0	0	0	1	0
ANKS6	0	0	0	0	0	0	0	1	0
ANKUB1	0	0	1	0	0	0	0	0	0
ANO4	0	0	0	1	0	0	0	1	0
ANO7	0	0	0	0	0	0	1	0	0
ANO8	0	0	0	0	0	0	0	1	0
ANP32B	0	0	0	0	0	0	0	1	0
AP1AR	0	0	0	0	0	0	0	1	0
AP1G2	0	0	1	0	0	0	0	0	0
AP1M2	0	0	1	0	0	0	0	0	0
AP2M1	0	0	1	0	0	0	0	0	0
AP4S1	0	0	0	0	0	0	0	1	0
APBA1	0	0	0	0	0	0	0	1	0
APBA2	0	0	0	0	0	0	0	1	0
APBB2	0	0	0	0	0	0	0	1	0
APC2	0	0	1	0	0	0	0	0	0
APCDD1	0	0	0	1	0	0	0	1	0
APEH	0	0	0	0	0	0	1	0	0
APITD1	0	0	0	0	0	1	0	0	0
APLN	0	0	0	0	0	0	0	1	0
APLP1	0	0	0	0	0	0	0	1	0
APLP2	0	0	0	0	0	0	0	1	0
APOBEC1	0	0	1	0	0	0	0	0	0
APOBEC2	0	0	0	0	0	0	1	0	0
APOF	0	0	0	0	0	1	0	0	0
APOH	0	0	0	0	0	0	0	1	0
APOL10B	1	1	0	0	0	0	0	0	0
APOL7A	0	0	1	0	0	0	0	0	0
APOL7C	0	1	0	0	0	0	0	0	0
APOPT1	0	0	0	0	0	0	0	1	0
AQP2	0	0	0	1	0	0	0	0	0
AQP5	0	0	0	1	0	0	0	0	0
AQP6	0	0	0	0	0	1	1	0	0
AQP7	0	0	0	0	0	0	1	0	0
AQP9	0	0	1	0	0	1	0	0	0
ARCN1	0	0	0	0	0	0	0	1	0
AREG	0	0	0	1	0	0	0	1	0
ARF3	0	0	0	0	0	0	0	1	0
ARF6	0	0	0	0	0	1	0	1	0
ARFGAP3	1	0	0	0	0	0	0	0	0
ARFGEF1	0	0	0	0	0	0	0	1	0
ARFIP1	0	1	0	0	0	0	0	0	0
ARG2	0	0	1	1	0	0	0	0	0
ARGLU1	0	0	0	0	0	0	0	1	0
ARHGAP20	0	0	0	0	0	0	0	1	0
ARHGAP21	0	0	0	0	0	0	0	1	0
ARHGAP22	0	0	0	0	0	0	1	0	0
ARHGAP33	0	0	0	0	0	1	0	0	0
ARHGAP35	0	0	0	0	0	0	0	1	0
ARHGAP5	0	0	0	0	0	0	0	1	0
ARHGAP6	0	0	0	0	0	0	1	0	0
ARHGAP8	0	0	1	0	0	0	1	0	0
ARHGDIA	0	0	0	0	0	0	0	1	0
ARHGEF16	0	0	0	0	0	0	0	1	0
ARHGEF28	0	0	0	0	0	0	0	1	0
ARHGEF7	0	0	0	0	0	0	0	1	0
ARID1A	0	0	0	0	0	0	1	1	0
ARID1B	0	0	0	0	0	0	0	1	0
ARID2	0	0	0	0	0	0	0	1	0
ARID3C	0	0	0	1	0	0	0	0	0
ARID4A	0	0	0	0	0	0	0	1	0
ARID4B	0	0	0	0	0	0	0	1	0
ARIH1	0	0	0	0	0	0	0	1	0
ARIH2	0	0	0	0	0	0	0	1	0
ARL11	0	0	1	0	0	0	0	0	0
ARMC1	0	0	0	0	0	0	0	1	0
ARMC10	0	0	0	0	0	1	0	0	0
ARMC3	0	0	0	0	0	1	0	0	0
ARNT2	0	0	0	0	0	0	0	1	0
ARPC1B	0	0	0	0	0	0	1	0	0
ARPC5	0	0	0	0	0	0	0	1	0
ARPP19	0	0	0	0	0	0	0	1	0
ARRDC5	0	0	0	0	0	1	0	0	0
ARSI	0	0	0	0	0	0	1	0	0
ARSK	0	0	1	0	0	0	0	0	0
ARTN	0	0	0	1	0	0	0	1	0
ASAH2	0	0	0	0	0	0	2	0	0
ASAP1	1	0	0	0	0	0	0	0	0
ASB1	0	0	0	0	0	1	0	0	0
ASB15	0	0	1	0	0	0	0	0	0
ASB3	0	0	0	0	0	0	0	1	0
ASB5	0	0	0	0	0	0	0	1	0
ASCL1	0	0	0	1	0	0	0	1	0
ASCL4	0	0	0	0	0	0	0	1	0
ASCL5	0	0	0	0	0	0	1	0	0
ASF1A	0	0	0	0	0	0	0	1	0
ASIC1	0	0	0	0	0	0	0	1	0
ASIC4	0	0	0	1	0	0	0	0	0
ASMT	0	0	0	0	0	1	0	0	0
ASNA1	0	0	0	0	0	0	0	1	0
ASNS	0	0	0	0	0	1	0	1	0
ASPG	0	0	1	0	0	0	0	0	0
ASPH	0	0	0	0	0	0	0	1	0
ASPHD2	0	0	0	1	0	1	0	1	0
ASXL1	0	0	0	0	0	0	0	1	0
ASXL2	0	0	0	0	0	1	0	0	0
ASXL3	0	0	0	1	0	0	0	1	0
ATAD2B	0	0	0	0	0	0	0	1	0
ATAT1	0	0	1	0	0	0	0	0	0
ATF3	0	0	0	1	0	0	0	0	0
ATF7	0	0	1	0	0	0	0	0	0
ATG16L1	0	0	0	0	0	0	0	1	0
ATG2B	0	0	0	0	0	0	0	1	0
ATG4B	0	0	0	0	0	1	0	1	0
ATG4C	0	0	0	0	0	1	1	0	0
ATIC	0	0	0	0	0	0	1	0	0
ATL2	0	0	0	0	0	0	0	1	0
ATMIN	0	0	0	0	0	0	0	1	0
ATOH1	0	0	0	1	0	0	0	0	0
ATOH7	0	0	0	0	0	0	0	1	0
ATOX1	0	0	1	0	0	0	0	0	0
ATP10A	0	0	0	0	0	0	0	1	0
ATP12A	0	0	0	1	0	0	0	0	0
ATP13A1	0	0	0	0	0	0	0	1	0
ATP13A3	0	0	0	0	0	0	0	1	0
ATP1A1	0	0	0	0	0	0	0	1	0
ATP1B2	0	0	0	0	0	0	0	1	0
ATP23	0	0	0	0	0	0	0	1	0
ATP2A2	0	0	0	0	0	0	0	1	0
ATP2B1	0	0	0	0	0	0	0	1	0
ATP2B3	0	0	0	0	0	0	0	1	0
ATP2C2	0	1	0	0	0	0	0	0	0
ATP4A	0	0	0	0	0	1	0	0	0
ATP5D	0	0	0	0	0	0	0	1	0
ATP6V0A4	0	0	0	0	0	1	0	1	0
ATP6V0B	0	0	0	0	0	0	0	2	0
ATP9B	0	0	0	0	0	0	0	1	0
ATPAF1	0	0	0	0	0	0	0	1	0
ATPAF2	0	0	0	0	0	0	0	1	0
ATR	0	0	0	0	0	1	0	1	0
ATRNL1	0	0	0	0	0	0	0	1	0
ATXN1	0	0	0	0	0	0	0	1	0
ATXN1L	0	0	0	0	0	0	0	1	0
ATXN2	0	0	0	0	0	0	0	1	0
ATXN7	0	0	0	0	0	0	0	1	0
ATXN7L3	0	0	0	0	0	0	0	1	0
AU019823	0	0	0	0	0	0	0	1	0
AU021092	0	0	1	0	0	0	0	0	0
AU040320	0	0	0	0	0	1	0	0	0
AUNIP	0	0	0	0	0	1	0	1	0
AUP1	0	0	0	0	0	0	0	1	0
AUTS2	0	0	0	0	0	0	0	1	0
AVP	0	0	0	1	0	0	0	0	0
AW822073	0	0	0	0	0	1	1	0	0
AXIN1	0	0	0	0	0	0	0	1	0
AZIN1	0	0	0	0	0	0	1	0	0
B230219D22RIK	0	0	0	0	0	1	0	1	0
B3GALNT2	0	0	0	0	0	1	0	0	0
B3GALT4	1	0	0	0	0	0	0	0	0
B3GALT6	0	0	0	0	0	0	0	1	0
B3GAT1	0	0	0	0	0	0	0	1	0
B3GAT2	0	0	0	1	0	0	0	0	0
B3GNT4	0	0	0	1	0	0	0	0	0
B3GNT7	0	0	0	0	0	0	2	0	0
B3GNT9	0	0	0	0	0	0	1	0	0
B430218F22RIK	0	0	0	0	0	0	0	1	0
B4GALNT1	0	0	0	0	0	0	0	1	0
B4GALNT2	0	0	0	1	0	0	0	0	0
B4GALNT4	0	0	0	0	0	0	0	1	0
B4GALT2	0	0	0	0	0	0	0	2	0
B4GALT6	0	0	0	0	0	0	1	1	0
B630019K06RIK	1	0	0	0	0	0	0	1	0
B9D1	1	0	0	0	0	0	0	0	0
BAD	1	0	0	0	0	0	0	0	0
BAG2	0	0	1	0	0	0	0	1	0
BAG5	0	0	0	0	0	0	0	1	0
BAHD1	0	0	1	1	0	0	0	1	0
BAIAP3	0	0	0	0	0	0	0	1	0
BANP	0	0	0	0	0	0	0	1	0
BARHL1	0	0	0	1	0	0	0	1	0
BARHL2	0	0	0	1	0	0	0	1	0
BARX1	0	0	0	1	0	0	0	1	0
BARX2	0	0	0	0	0	0	0	1	0
BATF3	0	0	0	0	0	0	0	1	0
BAZ1A	0	0	0	0	0	0	2	0	0
BAZ1B	0	0	0	0	0	0	0	1	0
BBIP1	0	0	0	0	0	0	0	1	0
BBOX1	0	0	0	0	0	1	0	1	0
BBS10	1	1	0	0	0	0	0	0	0
BC016579	0	0	0	0	0	1	1	1	0
BC017158	0	0	0	0	0	0	0	1	0
BC025920	0	0	1	0	0	0	0	0	0
BC030867	0	0	0	0	0	1	0	1	0
BC034090	0	0	0	0	0	0	0	1	0
BC035044	0	0	0	0	0	1	0	0	0
BC037034	0	0	0	0	0	0	0	1	0
BC051019	0	0	0	0	0	1	0	0	0
BC051142	1	0	1	0	0	0	0	0	0
BC067074	0	0	0	0	0	0	0	1	0
BCAN	0	0	0	1	0	0	0	1	0
BCAR3	0	0	0	0	0	0	0	1	0
BCL11A	0	0	0	0	0	0	0	1	0
BCL11B	0	0	0	1	0	0	0	0	0
BCL3	0	0	1	0	0	0	0	0	0
BCL7C	0	0	1	0	0	0	0	0	0
BCR	0	0	0	0	0	0	0	1	0
BDKRB2	0	0	0	1	0	0	0	0	0
BDNF	0	0	1	0	0	0	0	0	0
BDP1	1	0	0	0	0	0	0	0	0
BEAN1	0	0	0	0	0	0	0	1	0
BEGAIN	0	0	0	1	0	0	0	1	0
BEND3	0	0	0	0	0	0	0	1	0
BEND4	0	0	0	1	0	0	0	0	0
BEND5	0	0	0	0	0	0	1	1	0
BEND6	0	0	0	0	0	0	0	1	0
BEND7	0	0	0	0	0	0	1	1	0
BET1	1	0	0	0	0	0	0	0	0
BEX1	0	0	0	0	0	0	0	1	0
BEX2	0	0	0	0	0	0	0	1	0
BGN	0	0	1	0	0	0	0	0	0
BHLHE22	0	0	0	0	0	0	0	1	0
BHLHE41	1	0	0	0	0	0	0	0	0
BICDL1	0	0	0	0	0	0	0	1	0
BID	0	0	0	0	0	1	0	0	0
BIRC6	0	0	0	0	0	1	0	0	0
BLK	0	0	0	0	0	1	0	0	0
BLOC1S4	0	0	0	0	0	0	0	1	0
BLZF1	0	0	0	0	0	0	1	0	0
BMI1	0	0	0	1	0	0	0	0	0
BMP2	0	0	1	0	0	0	0	0	0
BMP2K	0	0	0	0	0	1	0	0	0
BMP3	0	0	0	0	0	0	0	1	0
BMP8A	0	0	0	0	0	0	0	1	0
BMPER	1	0	0	1	0	0	0	1	0
BMPR1B	0	0	0	1	0	0	0	1	0
BNC1	0	0	0	1	0	0	0	1	0
BNC2	0	0	0	1	0	0	0	1	0
BNIP2	0	0	0	0	0	0	0	1	0
BOC	0	0	0	1	0	0	1	0	0
BOK	1	0	0	0	0	0	0	0	0
BOLA1	0	0	0	0	0	1	2	0	0
BPGM	0	0	1	0	0	0	0	0	0
BPNT1	0	0	0	0	0	0	0	1	0
BPTF	0	0	0	0	0	0	0	1	0
BRD1	0	0	0	0	0	0	0	1	0
BRI3BP	0	0	0	0	0	1	0	1	0
BRICD5	0	0	0	0	0	0	0	1	0
BRINP1	0	0	0	0	0	0	1	1	0
BRINP2	0	0	0	0	0	0	1	0	0
BROX	0	0	0	0	0	1	0	0	0
BRPF3	0	0	0	0	0	0	0	1	0
BRSK1	0	0	0	0	0	0	0	1	0
BRSK2	0	0	0	1	0	0	0	0	0
BRWD1	0	0	0	0	0	0	0	1	0
BSN	0	0	0	0	0	0	0	1	0
BSPRY	0	0	0	0	0	0	0	1	0
BSX	0	0	0	1	0	0	0	0	0
BTAF1	0	0	0	0	0	1	0	0	0
BTBD1	0	0	0	0	0	0	0	1	0
BTBD17	0	0	0	1	0	0	0	0	0
BTBD18	0	0	1	0	0	0	0	0	0
BTBD19	0	0	1	0	0	0	0	0	0
BTBD6	0	0	0	0	0	0	0	1	0
BTBD7	0	0	0	0	0	0	0	1	0
BTC	1	0	0	0	0	0	0	0	0
BTG3	0	0	0	0	0	0	0	1	0
BUB3	0	0	0	1	0	0	0	0	0
BVES	0	0	0	0	0	1	0	1	0
BZW1	0	0	0	0	0	0	0	1	0
C130050O18RIK	0	0	1	0	0	0	0	0	0
C1GALT1	0	0	0	0	0	0	0	1	0
C1QA	0	0	1	0	0	0	0	0	0
C1QBP	0	0	0	0	0	0	0	1	0
C1QC	0	0	1	0	0	0	0	0	0
C1QL1	0	0	0	1	0	0	0	0	0
C1QL2	0	0	0	1	0	0	1	0	0
C1QL3	0	0	0	0	0	0	0	1	0
C1QL4	2	0	0	0	0	0	0	0	0
C1QTNF4	0	0	0	0	0	0	0	1	0
C1QTNF9	0	0	1	0	0	0	0	0	0
C2	0	0	0	0	0	0	0	1	0
C2CD3	0	0	0	0	0	1	0	0	0
C2CD4A	0	0	0	0	0	0	0	1	0
C2CD4B	0	0	0	1	0	0	0	1	0
C2CD4C	1	0	0	1	0	0	0	1	0
C2CD4D	2	1	0	0	0	0	0	0	0
C3	0	0	1	0	0	0	0	0	0
C330021F23RIK	0	0	0	0	0	1	0	1	0
C3AR1	0	0	1	0	0	0	0	0	0
C4BP	0	0	1	0	0	0	0	0	0
C530008M17RIK	0	0	0	0	0	1	0	1	0
C530025M09RIK	0	0	0	1	0	0	0	1	0
C5AR1	0	0	0	0	0	1	0	0	0
C5AR2	0	0	1	0	0	0	0	0	0
C77370	0	0	0	0	0	1	0	1	0
CAAP1	0	0	0	0	0	0	0	1	0
CAB39	0	0	0	0	0	0	0	1	0
CABLES2	0	0	0	0	0	0	0	1	0
CABP1	0	0	0	1	0	0	0	1	0
CABP7	0	0	0	1	0	0	0	1	0
CACNA1B	0	0	0	1	0	0	0	1	0
CACNA1D	0	0	0	0	0	0	1	0	0
CACNA1E	0	0	0	1	0	1	0	0	0
CACNA1G	0	0	0	1	0	0	0	0	0
CACNA1H	0	0	0	1	0	0	0	1	0
CACNA1I	0	0	0	0	0	0	0	1	0
CACNA1S	0	0	0	0	0	0	1	0	0
CACNA2D2	0	0	0	0	0	0	0	1	0
CACNA2D3	0	0	0	0	0	0	0	1	0
CACNB2	0	0	0	0	0	0	1	0	0
CACNB4	0	0	0	0	0	0	0	1	0
CACNG3	0	0	0	0	0	0	0	1	0
CACNG4	0	0	0	1	0	0	0	1	0
CACNG7	1	0	1	0	0	0	0	0	0
CACTIN	0	0	1	0	0	0	0	0	0
CACUL1	0	0	0	0	0	1	0	0	0
CACYBP	0	0	0	0	0	0	0	1	0
CADM1	1	0	0	0	0	0	0	0	0
CADM2	0	0	0	1	0	0	0	0	0
CALCB	0	0	0	1	0	0	0	0	0
CALM1	0	0	0	0	0	0	0	1	0
CALM2	0	0	0	0	0	0	0	1	0
CALY	0	0	0	1	0	0	0	0	0
CAMK2G	0	0	0	0	0	0	0	1	0
CAMK2N1	0	0	0	0	0	0	0	1	0
CAMK4	0	0	0	0	0	0	0	1	0
CAMKK1	0	0	0	1	0	0	0	0	0
CAMKK2	0	0	0	0	0	0	0	1	0
CAMKV	0	0	0	0	0	0	0	1	0
CAMSAP2	0	0	0	0	0	0	0	1	0
CAMSAP3	0	0	0	0	0	0	0	1	0
CAMTA1	0	0	0	0	0	0	0	1	0
CAND1	0	0	0	0	0	0	0	1	0
CAR11	1	0	1	1	0	0	0	0	0
CAR15	0	0	0	1	0	0	0	0	0
CAR6	0	0	0	0	0	1	0	0	0
CAR7	0	0	0	0	0	0	0	1	0
CAR9	0	0	1	0	0	0	0	0	0
CARD14	0	0	0	0	0	1	0	0	0
CARM1	0	0	0	0	0	0	0	1	0
CARMIL3	0	0	0	0	0	0	0	1	0
CARNMT1	0	0	0	0	0	0	0	1	0
CARS2	0	0	0	0	0	0	0	1	0
CARTPT	0	0	0	1	0	0	0	0	0
CASD1	0	0	0	0	0	0	0	1	0
CASKIN1	0	0	0	0	0	0	0	1	0
CASKIN2	0	0	0	0	0	0	0	1	0
CASP12	0	0	1	0	0	0	0	0	0
CASP9	0	0	0	0	0	0	0	1	0
CATSPERD	0	0	0	0	0	0	0	1	0
CATSPERG1	0	0	1	0	0	0	0	0	0
CATSPERZ	0	0	0	1	0	0	0	0	0
CAV1	1	0	1	0	0	0	0	0	0
CBARP	0	0	0	0	0	0	0	1	0
CBFB	0	0	0	0	0	0	0	1	0
CBLN1	0	0	0	0	0	0	0	1	0
CBR2	0	0	0	0	0	2	0	0	0
CBR3	1	0	0	1	0	1	0	0	0
CBX2	0	0	0	0	0	0	0	1	0
CBX8	0	0	1	0	0	0	0	1	0
CCDC105	0	0	0	1	0	0	0	1	0
CCDC112	0	0	0	0	0	0	0	1	0
CCDC114	0	0	1	0	0	0	0	0	0
CCDC12	1	0	0	0	0	0	0	1	0
CCDC122	0	0	0	0	0	0	0	1	0
CCDC136	0	0	0	0	0	0	0	1	0
CCDC148	0	0	0	0	0	0	0	1	0
CCDC159	0	0	1	0	0	0	0	0	0
CCDC162	0	0	0	0	0	0	1	0	0
CCDC166	1	0	0	0	0	0	0	0	0
CCDC177	0	0	0	1	0	0	0	1	0
CCDC186	0	0	0	1	0	0	0	1	0
CCDC25	0	0	0	0	0	0	0	1	0
CCDC3	0	0	0	1	0	0	0	0	0
CCDC36	0	0	0	0	0	0	1	0	0
CCDC71L	0	0	0	0	0	0	0	1	0
CCDC85C	0	0	0	0	0	0	0	1	0
CCDC86	0	0	0	0	0	1	0	0	0
CCDC87	0	0	1	0	0	0	0	0	0
CCDC88B	0	0	1	0	0	0	0	0	0
CCDC92	0	0	0	0	0	0	0	1	0
CCDC92B	0	0	0	0	0	0	0	1	0
CCER2	0	0	0	0	0	0	1	0	0
CCHCR1	0	0	0	0	0	0	1	0	0
CCL3	0	0	1	0	0	0	0	0	0
CCNA1	0	0	0	0	0	0	0	1	0
CCND2	0	0	0	1	0	0	0	0	0
CCNF	1	1	0	0	0	0	0	0	0
CCNI	0	0	0	0	0	0	0	1	0
CCNJL	0	0	0	0	0	0	0	1	0
CCNO	0	0	0	1	0	0	0	0	0
CCNY	0	0	0	0	0	0	0	1	0
CCNYL1	0	0	0	0	0	0	0	1	0
CCP110	0	0	1	0	0	0	0	0	0
CCR3	0	0	0	0	0	1	0	0	0
CCS	0	0	1	0	0	0	0	0	0
CCSAP	0	0	0	0	0	0	0	1	0
CCSER1	0	0	0	0	0	0	0	1	0
CCSER2	0	0	0	0	0	0	0	1	0
CD109	0	0	0	1	0	0	1	1	0
CD14	1	0	0	0	0	1	0	0	0
CD164L2	0	0	0	0	0	0	0	1	0
CD2	0	0	0	0	0	1	0	0	0
CD300C	0	0	0	0	0	1	0	0	0
CD300C2	0	0	1	0	0	0	0	0	0
CD300LB	0	0	1	0	0	0	0	0	0
CD300LF	0	0	1	0	0	0	0	0	0
CD40	0	0	0	0	0	0	1	0	0
CD40LG	1	0	0	0	0	0	0	0	0
CD44	0	0	1	0	0	1	0	0	0
CD48	0	0	1	0	0	0	0	0	0
CD52	0	0	1	0	0	0	0	0	0
CD69	0	0	1	0	0	0	0	0	0
CD72	0	0	1	0	0	0	0	0	0
CD84	0	0	1	0	0	0	0	0	0
CDAN1	0	0	0	0	0	0	0	1	0
CDC14B	0	0	0	0	0	0	0	1	0
CDC16	0	0	0	0	0	0	0	1	0
CDC20B	0	0	0	0	0	0	0	1	0
CDC40	0	0	0	0	0	0	0	1	0
CDC42	0	0	0	0	0	0	0	1	0
CDC42BPA	0	0	0	0	0	0	0	1	0
CDC5L	0	0	0	0	0	0	0	1	0
CDC6	0	0	0	0	0	1	0	0	0
CDC7	0	0	0	0	0	1	0	0	0
CDH11	0	0	0	1	0	0	0	0	0
CDH12	0	0	0	0	0	1	0	1	0
CDH13	0	0	0	1	0	0	0	0	0
CDH22	0	0	0	1	0	1	0	1	0
CDH24	0	0	0	0	0	0	0	1	0
CDK13	0	0	0	0	0	0	0	1	0
CDK17	0	0	0	0	0	0	0	1	0
CDK20	0	0	0	0	0	1	0	0	0
CDK5R1	0	0	0	0	0	0	0	1	0
CDK5R2	0	0	0	1	0	0	0	0	0
CDK6	0	0	0	0	0	0	0	1	0
CDK8	0	0	0	0	0	0	0	1	0
CDKAL1	0	0	1	0	0	1	0	0	0
CDKL1	0	0	0	0	0	0	1	0	0
CDKL2	1	0	0	0	0	0	0	0	0
CDKL4	0	0	1	0	0	0	0	0	0
CDKN2A	0	0	0	1	0	0	0	1	0
CDKN2B	1	0	0	1	0	0	0	0	0
CDS1	0	0	0	1	0	0	0	1	0
CDV3	0	0	0	0	0	0	0	1	0
CDX1	0	0	0	1	0	1	1	0	0
CDYL2	0	0	0	0	0	0	0	1	0
CEACAM20	0	0	0	0	0	1	0	0	0
CEBPA	0	0	0	0	0	0	0	1	0
CEBPG	0	0	0	0	0	0	0	1	0
CECR2	0	0	0	0	0	0	0	1	0
CECR6	0	0	0	1	0	0	0	1	0
CELA3B	0	0	0	0	0	0	2	0	0
CELF4	1	0	0	1	0	0	0	0	0
CELF6	0	0	0	0	0	0	0	1	0
CELSR2	0	1	0	0	0	0	0	1	0
CENPB	1	0	0	0	0	0	0	0	0
CENPV	0	0	0	0	0	0	0	1	0
CEP104	0	0	0	0	0	0	0	1	0
CEP112	0	0	0	0	0	0	0	1	0
CEP120	0	0	0	0	0	0	0	1	0
CEP126	0	0	0	0	0	0	0	1	0
CEP131	0	0	0	0	0	0	0	1	0
CEP135	0	0	0	0	0	0	0	1	0
CEP350	0	0	0	0	0	0	0	1	0
CEP68	0	0	0	0	0	0	0	1	0
CEP76	0	0	0	0	0	0	0	1	0
CEP78	0	0	0	0	0	0	0	1	0
CEP85	0	0	0	0	0	1	0	0	0
CEP85L	0	0	0	0	0	1	0	1	0
CEP89	0	0	0	0	0	1	1	0	0
CERKL	0	0	0	1	0	0	0	0	0
CERS1	0	0	0	0	0	0	0	1	0
CES1G	1	0	0	0	0	0	0	0	0
CES2F	0	0	0	0	0	1	0	0	0
CES2H	1	1	0	0	0	0	0	0	0
CFAP44	0	0	0	0	0	0	1	1	0
CFAP46	1	0	0	0	0	0	0	0	0
CFAP54	0	0	2	0	0	0	0	0	0
CFAP69	0	0	0	0	0	2	0	0	0
CFAP97	0	0	0	0	0	0	0	1	0
CFAP99	0	0	0	0	0	0	0	1	0
CFHR2	0	1	0	0	0	0	0	0	0
CFL2	0	0	0	0	0	0	0	1	0
CHADL	0	0	0	0	0	0	0	1	0
CHAMP1	0	0	0	0	0	0	0	1	0
CHAT	0	0	0	1	0	0	0	0	0
CHCHD10	0	0	0	0	0	0	0	1	0
CHCHD7	0	1	0	0	0	0	0	0	0
CHD1L	0	0	0	0	0	0	0	1	0
CHD2	0	1	0	0	0	0	0	0	0
CHD3	0	0	1	0	0	0	0	1	0
CHD4	0	0	0	0	0	0	1	0	0
CHD5	0	0	0	1	0	0	0	0	0
CHD6	0	0	0	0	0	0	0	1	0
CHD7	0	0	0	0	0	0	0	1	0
CHGB	0	0	0	0	0	0	0	1	0
CHIL3	0	0	0	0	0	0	0	1	0
CHIL4	0	0	0	0	0	0	0	0	1
CHKA	0	0	0	0	0	0	0	1	0
CHL1	0	0	0	1	0	0	0	0	0
CHM	0	0	1	0	0	0	0	0	0
CHN1	0	0	0	1	0	0	0	1	0
CHN2	0	0	0	0	0	0	0	1	0
CHODL	0	0	0	0	0	0	1	0	0
CHPF	1	0	0	0	0	0	0	1	0
CHRD	0	0	1	0	0	0	0	1	0
CHRDL2	0	0	0	0	0	1	0	1	0
CHRM1	0	0	0	0	0	2	0	1	0
CHRM3	1	0	1	0	0	0	0	0	0
CHRM4	0	0	0	1	0	0	0	0	0
CHRNA3	0	0	0	1	0	0	0	0	0
CHRNA5	0	0	0	0	0	0	0	1	0
CHRNB1	0	0	1	0	0	0	0	0	0
CHRNE	0	0	0	0	0	0	1	0	0
CHST1	0	0	0	0	0	0	0	1	0
CHST10	0	0	0	0	0	0	1	1	0
CHST11	0	0	0	1	0	0	0	1	0
CHST3	0	0	0	0	0	1	0	1	0
CHST8	0	0	0	1	0	0	0	1	0
CHST9	0	0	0	0	0	0	0	1	0
CHSY3	0	0	0	0	0	0	0	1	0
CIAPIN1	0	0	0	0	0	0	1	0	0
CIDEB	0	0	0	0	0	0	1	1	0
CIITA	0	0	1	0	0	0	0	0	0
CILP	1	0	0	0	0	0	0	0	0
CILP2	0	0	0	1	0	1	0	0	0
CITED2	0	0	0	0	0	1	0	0	0
CITED4	0	0	0	0	0	0	0	1	0
CIZ1	0	0	0	1	0	0	0	0	0
CKM	0	0	0	0	0	0	0	1	0
CKMT1	0	0	1	0	0	0	0	0	0
CLASP2	0	0	0	0	0	0	0	1	0
CLCF1	1	0	0	0	0	0	0	1	0
CLDN15	0	0	1	0	0	0	0	0	0
CLDN23	0	0	0	1	0	0	0	0	0
CLDN3	0	0	1	0	0	0	0	0	0
CLDN34D	0	0	0	0	0	1	0	1	0
CLDN4	2	0	0	0	0	0	0	0	0
CLDN6	0	0	0	1	0	0	0	0	0
CLDN7	0	0	0	1	0	0	0	0	0
CLDN9	0	0	0	1	0	0	0	0	0
CLEC2I	0	0	0	0	0	1	0	0	0
CLEC2L	0	0	0	0	0	0	0	1	0
CLEC3B	0	0	0	0	0	1	0	0	0
CLIC3	1	0	0	0	0	0	0	0	0
CLIC4	0	0	0	0	0	0	0	1	0
CLINT1	0	0	0	0	0	0	0	1	0
CLIP1	0	0	0	0	0	0	0	1	0
CLIP4	0	0	0	1	0	0	0	0	0
CLOCK	0	0	0	0	0	0	0	1	0
CLP1	0	0	1	0	0	0	0	0	0
CLSTN2	0	0	0	0	0	0	0	1	0
CLTB	1	0	0	0	0	0	0	0	0
CLUH	0	0	0	0	0	0	0	1	0
CMIP	0	0	0	0	0	0	0	1	0
CMTR2	0	0	0	0	0	0	1	0	0
CNBD2	0	0	0	0	0	0	0	1	0
CNBP	0	0	0	0	0	0	0	1	0
CNEP1R1	0	0	0	0	0	0	0	1	0
CNFN	0	0	0	1	0	0	0	0	0
CNGA1	0	0	0	0	0	1	0	1	0
CNIH1	0	0	0	0	0	0	0	1	0
CNIH2	0	0	0	0	0	0	0	1	0
CNIH3	0	0	0	1	0	0	0	1	0
CNIH4	0	0	0	0	0	1	0	0	0
CNKSR1	0	0	1	0	0	0	0	0	0
CNKSR2	0	0	0	0	0	0	0	1	0
CNN1	0	0	0	0	0	1	0	0	0
CNNM1	1	0	0	1	0	0	0	1	0
CNNM2	0	0	0	0	0	0	0	1	0
CNNM3	0	0	0	0	0	0	0	1	0
CNOT11	0	0	0	0	0	0	0	1	0
CNOT2	0	0	0	0	0	0	0	1	0
CNOT3	0	0	0	0	0	0	0	1	0
CNOT6	0	0	0	0	0	0	0	1	0
CNOT6L	0	0	0	0	0	0	0	1	0
CNP	0	0	1	0	0	0	0	0	0
CNR1	0	0	0	0	0	0	0	1	0
CNTFR	1	0	0	0	0	0	0	0	0
CNTN2	0	0	0	1	0	0	0	0	0
COBLL1	0	0	0	0	0	0	0	1	0
COCH	0	0	0	1	0	0	0	1	0
COG1	0	0	0	0	0	0	0	1	0
COG3	0	0	0	0	0	0	0	1	0
COIL	0	0	0	0	0	1	0	1	0
COL11A1	0	0	0	0	0	0	0	1	0
COL12A1	0	0	0	1	0	0	0	0	0
COL15A1	1	0	0	1	0	0	1	0	0
COL18A1	0	0	0	1	0	0	0	0	0
COL23A1	0	0	0	0	0	0	0	1	0
COL24A1	0	0	0	0	0	0	1	0	0
COL2A1	0	0	0	1	0	0	0	0	0
COLCA2	0	0	0	0	0	1	1	1	0
COLEC10	0	0	0	0	0	0	0	1	0
COLEC12	1	0	0	0	0	0	0	0	0
COLGALT1	0	0	0	0	0	0	0	1	0
COLGALT2	0	0	0	0	0	0	0	1	0
COMMD3	0	0	0	0	0	0	0	1	0
COMP	0	0	0	1	0	0	0	0	0
COPB1	0	0	0	0	0	0	0	1	0
COPRS	0	0	0	0	0	0	0	1	0
COPS5	0	0	0	0	0	0	0	1	0
COPZ1	0	0	0	0	0	1	0	0	0
COQ10B	0	0	0	0	0	0	0	1	0
COQ8B	1	0	1	0	0	0	0	0	0
COQ9	0	0	0	0	0	0	1	0	0
CORIN	0	0	0	0	0	0	0	1	0
CORO1C	0	0	0	0	0	0	0	1	0
CORO6	0	0	0	0	0	0	0	1	0
COX10	0	0	0	0	0	0	2	0	0
COX19	1	0	0	0	0	0	0	0	0
COX4I1	0	0	0	0	0	0	0	1	0
COX5A	0	0	0	0	0	0	0	1	0
COX6A1	0	0	0	0	0	0	0	1	0
COX6B2	0	0	0	0	0	1	0	0	0
COX7A2	0	1	0	0	0	0	0	0	0
CPA4	0	1	0	0	0	0	0	0	0
CPD	0	0	0	0	0	0	0	1	0
CPLX1	0	0	0	1	0	0	0	0	0
CPNE3	0	0	0	0	0	1	0	0	0
CPNE5	0	0	0	1	0	0	0	1	0
CPNE7	0	0	0	0	0	1	0	1	0
CPNE8	1	0	0	0	0	0	0	0	0
CPSF3	0	0	0	0	0	0	1	0	0
CPSF6	0	0	0	0	0	0	0	1	0
CPXM2	1	0	0	0	0	0	1	0	0
CRABP2	0	0	0	1	0	0	0	0	0
CRB2	0	0	0	0	0	1	0	0	0
CRB3	0	0	0	0	0	0	0	1	0
CRBN	0	0	1	0	0	0	0	0	0
CREB3L4	0	0	1	0	0	0	0	0	0
CREB5	0	0	0	1	0	0	0	0	0
CREBBP	0	0	0	0	0	0	0	1	0
CREBL2	0	0	0	0	0	1	0	0	0
CREBRF	0	0	0	0	0	1	0	0	0
CRHBP	0	0	0	0	0	0	1	0	0
CRISP2	0	0	0	0	0	1	0	0	0
CRISPLD2	0	0	1	0	0	0	0	0	0
CRLF1	0	0	0	1	0	0	0	0	0
CRLF2	1	0	0	0	0	0	0	0	0
CRLS1	0	0	0	0	0	0	0	1	0
CRMP1	0	0	0	1	0	0	0	1	0
CROT	0	0	1	0	0	0	0	0	0
CRTAC1	0	0	0	0	0	0	0	1	0
CRTC3	0	0	0	0	0	0	0	1	0
CRYAB	0	0	1	0	0	0	0	0	0
CRYBA2	0	0	0	1	0	0	0	0	0
CRYGN	1	0	1	0	0	0	0	0	0
CRYZL1	0	0	0	0	0	0	0	1	0
CSDC2	0	0	0	0	0	1	0	0	0
CSF2RA	0	0	0	0	0	1	0	0	0
CSF2RB	0	0	1	0	0	0	0	0	0
CSF3R	1	0	1	0	0	0	0	0	0
CSMD1	0	0	0	0	0	0	0	1	0
CSMD2	0	0	0	1	0	0	0	1	0
CSNK1D	0	0	0	0	0	0	0	1	0
CSNK1E	0	0	0	0	0	0	0	1	0
CSNK1G2	0	0	0	0	0	1	0	0	0
CSNK1G3	0	0	0	0	0	0	0	1	0
CSNK2A2	0	0	0	0	0	0	0	1	0
CSPG5	1	0	0	0	0	0	0	1	0
CSPP1	0	0	0	0	0	0	0	1	0
CST6	0	0	0	0	0	0	1	0	0
CTCFL	0	1	0	0	0	0	0	0	0
CTDNEP1	0	0	0	0	0	0	0	1	0
CTDP1	0	0	0	0	0	0	0	1	0
CTDSP2	0	0	0	0	0	0	0	1	0
CTF1	0	0	1	0	0	0	0	0	0
CTNNA1	0	0	0	0	0	0	0	1	0
CTNNA2	0	0	0	0	0	0	0	1	0
CTNNAL1	0	0	0	0	0	0	0	1	0
CTNND2	1	0	0	1	0	0	0	1	0
CTSC	0	0	1	0	0	0	0	0	0
CTSS	0	0	1	0	0	0	0	0	0
CTTNBP2	0	0	0	0	0	0	0	1	0
CTU2	0	0	0	0	0	0	0	1	0
CUL1	0	0	0	0	0	0	0	1	0
CUL4A	0	0	0	0	0	0	0	1	0
CWH43	0	0	0	1	0	0	0	0	0
CX3CL1	0	0	1	1	0	0	0	0	0
CXCL14	1	0	1	0	0	0	0	0	0
CXCL2	1	0	0	0	0	0	0	0	0
CXCL3	0	0	0	0	0	1	0	0	0
CXCL9	0	0	0	0	0	1	0	0	0
CXCR1	1	0	0	0	0	0	0	0	0
CXXC5	0	0	0	0	0	0	1	0	0
CYBRD1	0	0	0	0	0	0	0	1	0
CYC1	0	0	0	0	0	0	0	1	0
CYHR1	0	0	0	0	0	0	0	1	0
CYLD	0	0	0	0	0	0	0	1	0
CYM	0	0	0	0	0	0	1	0	0
CYP1B1	0	0	1	0	0	0	0	0	0
CYP24A1	0	0	0	1	0	0	0	0	0
CYP26B1	0	0	0	1	0	0	0	0	0
CYP27B1	0	0	0	1	0	0	0	0	0
CYP2A5	1	0	0	0	0	1	1	0	0
CYP2C44	1	0	1	0	0	0	0	0	0
CYP2D12	1	0	0	0	0	0	0	0	0
CYP2D34	1	0	0	0	0	0	0	0	0
CYP2D37-PS	0	0	0	0	0	0	0	1	0
CYP2E1	0	0	1	0	0	0	0	0	0
CYP2W1	1	0	0	0	0	0	0	0	0
CYP3A11	0	0	0	0	0	1	1	1	0
CYP3A25	0	1	0	0	0	0	0	0	0
CYP46A1	1	0	0	0	0	0	0	0	0
CYP4A10	0	0	0	0	0	1	0	0	0
CYP4A32	0	0	1	0	0	0	0	0	0
CYP4B1	0	0	1	0	0	0	0	0	0
CYP4F17	0	0	1	0	0	0	0	0	0
CYP4F18	0	0	1	0	0	0	0	0	0
CYP7A1	0	0	0	0	0	0	0	1	0
CYSLTR2	0	0	1	0	0	0	0	0	0
CYSRT1	0	0	0	1	0	0	0	0	0
CYTH1	0	0	1	0	0	0	0	0	0
CYTH2	0	0	0	0	0	0	0	1	0
CYTH4	0	0	1	0	0	0	0	0	0
D030056L22RIK	0	0	0	0	0	0	0	1	0
D11WSU47E	0	0	0	0	0	0	0	1	0
D1ERTD622E	0	0	0	0	0	0	0	1	0
D2HGDH	0	0	1	0	0	0	0	0	0
D330020A13RIK	0	0	0	0	0	0	0	1	0
D3ERTD254E	0	0	0	0	0	0	0	1	0
D430041D05RIK	0	0	0	1	0	0	0	1	0
D630044L22RIK	0	0	0	0	0	0	1	1	0
D6ERTD527E	0	0	1	0	0	0	0	0	0
D6WSU163E	0	0	0	0	0	1	0	0	0
D930007J09RIK	1	0	0	0	0	0	0	1	0
DAB2IP	1	0	0	0	0	0	0	0	0
DACH2	0	1	0	0	0	0	0	1	0
DACT1	1	0	0	0	0	0	0	0	0
DACT2	0	0	0	0	0	0	0	1	0
DACT3	0	0	0	0	0	0	0	1	0
DARS2	0	0	0	0	0	1	0	0	0
DBIL5	0	0	0	0	0	0	1	0	0
DBNDD1	0	0	0	0	0	0	1	1	0
DBNDD2	1	0	0	0	0	0	0	1	0
DBNL	0	0	0	0	0	0	1	0	0
DBT	0	0	0	0	0	2	0	0	0
DBX2	0	0	0	0	0	0	1	0	0
DCAF10	0	0	0	0	0	0	0	1	0
DCAF11	0	0	1	0	0	0	0	0	0
DCAF12L2	0	0	0	0	0	0	0	1	0
DCAF17	0	0	0	0	0	0	1	0	0
DCBLD2	0	0	0	0	0	0	0	1	0
DCLK1	0	0	0	1	0	0	0	0	0
DCLK2	0	0	0	0	0	0	0	1	0
DCLK3	0	0	0	0	0	0	0	1	0
DCN	0	0	0	0	0	0	1	0	0
DCTN3	0	0	0	1	0	0	0	0	0
DCUN1D5	0	0	0	0	0	0	0	1	0
DDAH1	0	0	0	0	0	0	0	1	0
DDI2	0	0	0	0	0	0	0	1	0
DDN	0	0	0	1	0	0	0	1	0
DDR1	2	0	0	1	0	0	0	0	0
DDR2	0	0	1	0	0	0	0	0	0
DDX19B	0	0	1	0	0	0	0	0	0
DDX20	0	0	0	0	0	0	0	1	0
DDX28	1	0	0	0	0	0	0	0	0
DDX4	0	0	0	0	0	1	0	0	0
DDX43	0	0	0	0	0	0	0	1	0
DDX59	0	0	0	0	0	0	0	1	0
DEF6	0	0	0	0	0	1	0	0	0
DEFB13	0	0	0	0	0	1	0	0	0
DENND1B	0	0	0	0	0	0	0	1	0
DENND4C	0	0	0	0	0	0	0	1	0
DENND5A	0	0	0	0	0	0	0	1	0
DFFB	0	0	0	0	0	0	0	1	0
DGCR14	0	0	0	0	0	0	0	1	0
DGCR2	0	0	0	0	0	0	0	1	0
DGCR8	0	0	0	0	0	0	0	1	0
DGKD	0	0	0	0	0	0	0	1	0
DGKE	0	0	0	0	0	1	0	0	0
DGKG	0	0	1	0	0	0	0	0	0
DGKI	0	0	0	1	0	0	0	1	0
DGKK	0	0	0	0	0	0	0	1	0
DHRS1	0	0	0	0	0	0	0	1	0
DHRS4	0	0	1	0	0	0	0	0	0
DHX16	0	0	0	0	0	0	0	1	0
DHX34	0	0	1	0	0	0	0	0	0
DHX58	0	0	1	0	0	0	0	0	0
DHX8	0	0	0	0	0	1	0	0	0
DIABLO	0	0	0	0	0	0	0	1	0
DICER1	0	0	0	0	0	1	0	1	0
DIO3	0	0	0	0	0	1	0	1	0
DIP2C	0	0	0	0	0	0	0	1	0
DIRAS1	0	0	0	0	0	1	0	0	0
DIS3	0	0	0	0	0	0	0	1	0
DISC1	0	0	0	0	0	0	1	1	0
DISP1	0	0	0	0	0	0	0	1	0
DISP3	0	0	0	0	0	0	0	1	0
DKK1	0	0	0	0	0	0	1	0	0
DKK2	0	0	0	1	0	0	0	0	0
DKK3	0	0	1	0	0	0	0	0	0
DKK4	2	0	0	0	0	0	0	0	0
DKKL1	0	0	0	0	0	2	1	0	0
DLEU7	0	0	0	0	0	0	0	1	0
DLGAP3	0	0	0	1	0	0	0	1	0
DLGAP4	0	0	0	0	0	0	0	1	0
DLK1	0	0	0	1	0	0	0	1	0
DLK2	0	0	0	0	0	0	0	1	0
DLST	0	0	0	0	0	0	0	1	0
DLX1	0	0	0	1	0	0	0	0	0
DLX2	1	0	0	1	0	0	0	0	0
DLX3	0	0	0	1	0	0	0	0	0
DLX4	0	0	0	1	0	0	0	0	0
DLX5	0	0	0	1	0	0	0	0	0
DLX6	0	0	0	1	0	0	0	1	0
DMBX1	0	0	0	1	0	0	0	0	0
DMRT1	0	0	0	0	0	0	1	0	0
DMRT2	0	0	0	1	0	0	0	1	0
DMRT3	0	0	0	0	0	1	0	1	0
DMRTA2	0	0	0	1	0	0	0	2	0
DMTF1	0	0	0	0	0	0	0	1	0
DMTN	0	0	0	1	0	0	0	0	0
DMWD	0	0	0	0	0	0	0	1	0
DMXL1	0	0	0	0	0	0	0	1	0
DNAAF1	0	0	0	0	0	0	0	1	0
DNAAF2	0	0	0	0	0	0	0	1	0
DNAH1	0	0	1	0	0	0	1	0	0
DNAH11	0	0	0	0	0	0	1	0	0
DNAJA2	0	0	0	0	0	0	0	1	0
DNAJB14	0	0	0	0	0	0	0	1	0
DNAJB3	0	0	0	0	0	0	1	1	0
DNAJB4	0	0	0	0	0	0	0	1	0
DNAJB7	0	0	0	0	0	0	1	0	0
DNAJC1	0	0	0	0	0	0	0	1	0
DNAJC11	0	0	0	0	0	0	0	1	0
DNAJC16	0	0	0	0	0	0	0	1	0
DNAJC21	0	0	0	0	0	0	0	1	0
DNAJC22	1	0	0	0	0	0	0	0	0
DNAJC3	0	0	1	0	0	1	0	1	0
DNAJC6	0	0	0	0	0	0	0	1	0
DNAJC8	0	0	0	0	0	0	0	1	0
DNER	0	0	0	0	0	0	0	1	0
DNM1	0	0	0	1	0	0	0	0	0
DNM1L	0	0	0	0	0	0	1	0	0
DNM3	0	0	0	0	0	1	0	0	0
DOC2A	0	0	0	1	0	1	0	1	0
DOC2B	0	0	0	1	0	0	0	1	0
DOCK3	0	0	0	1	0	0	0	0	0
DOCK8	0	0	0	0	0	0	0	1	0
DOK6	0	0	0	0	0	0	0	1	0
DOK7	0	0	0	1	0	0	0	1	0
DOPEY1	0	0	0	0	0	0	0	2	0
DOPEY2	0	0	0	0	0	0	0	1	0
DPF1	0	0	0	1	0	1	0	0	0
DPM1	0	0	0	0	0	0	0	1	0
DPM2	0	0	0	0	0	0	1	0	0
DPT	0	0	1	0	0	0	0	0	0
DPY30	0	0	0	0	0	1	0	0	0
DPYSL2	0	0	0	0	0	0	0	1	0
DPYSL4	0	0	1	0	0	0	1	0	0
DPYSL5	0	0	0	1	0	0	0	0	0
DRAXIN	0	0	0	1	0	1	0	0	0
DRD1	0	0	0	1	0	0	0	0	0
DRD2	0	0	0	1	0	0	0	1	0
DRD4	0	0	0	1	0	0	0	0	0
DSC3	0	0	0	0	0	0	1	0	0
DSCAM	0	0	0	1	0	0	0	0	0
DST	0	0	0	0	0	0	0	1	0
DTNB	0	0	0	0	0	0	0	1	0
DTX1	0	0	1	1	0	0	0	0	0
DTX4	0	0	0	0	0	0	0	1	0
DUOX2	0	0	0	1	0	0	0	0	0
DUOXA2	0	0	0	1	0	0	0	0	0
DUS1L	0	0	1	0	0	0	0	0	0
DUSP15	0	0	0	0	0	1	0	1	0
DUSP28	0	0	0	0	0	0	0	1	0
DUSP3	0	0	0	0	0	1	0	0	0
DUSP7	0	0	0	0	0	0	0	1	0
DUT	0	0	0	0	0	0	1	0	0
DUXF3	0	0	0	0	0	1	1	0	0
DYNC1I1	0	0	0	0	0	0	1	0	0
DYNC2H1	0	0	0	0	0	0	0	1	0
DYNLL2	0	0	0	0	0	0	0	1	0
DYNLRB2	0	0	0	0	0	1	0	0	0
DYNLT1C	0	0	1	0	0	0	0	0	0
DYRK1A	0	0	0	0	0	0	0	1	0
DYRK1B	0	0	0	0	0	0	0	1	0
DYRK3	0	0	0	0	0	1	0	1	0
DZIP1	0	0	0	1	0	0	0	0	0
E030018B13RIK	0	0	1	0	0	0	0	0	0
E130114P18RIK	0	0	0	0	0	0	0	1	0
E130208F15RIK	0	0	0	0	0	0	0	1	0
E130308A19RIK	0	0	0	0	0	0	0	1	0
E130309D02RIK	0	0	0	0	0	0	0	1	0
E2F1	0	0	0	0	0	0	0	1	0
E2F3	0	0	0	0	0	0	1	1	0
E2F5	0	0	0	0	0	0	0	1	0
E2F6	0	0	0	0	0	0	0	1	0
E2F8	0	0	1	0	0	0	0	1	0
E330009J07RIK	0	0	0	0	0	0	0	1	0
EAF1	0	0	0	0	0	0	1	0	0
EARS2	0	0	0	0	0	0	0	1	0
EBF1	0	0	0	1	0	0	0	1	0
EBF2	0	0	0	1	0	0	0	0	0
EBF3	0	0	0	1	0	0	0	1	0
EBF4	0	0	0	1	0	0	0	1	0
ECEL1	0	0	0	0	0	0	0	1	0
ECH1	0	0	2	0	0	0	0	0	0
EDA2R	0	0	1	0	0	0	0	0	0
EDEM1	0	0	0	0	0	0	0	1	0
EDIL3	0	0	0	0	0	0	1	1	0
EDN1	0	0	0	0	0	1	0	0	0
EDNRA	0	0	0	0	0	1	0	0	0
EEA1	0	0	0	0	0	0	0	1	0
EEF2	0	0	1	0	0	0	0	0	0
EFCAB8	0	0	0	0	0	1	0	0	0
EFCC1	0	0	0	0	0	0	0	1	0
EFHD2	1	0	0	0	0	0	0	0	0
EFNA3	0	0	0	1	0	0	0	1	0
EFNA4	0	0	0	0	0	0	0	1	0
EFNA5	1	0	0	1	0	0	0	0	0
EFNB3	0	0	0	0	0	1	0	0	0
EFR3A	0	0	0	0	0	0	0	1	0
EFR3B	0	0	0	1	0	0	0	1	0
EFS	1	0	0	1	0	0	0	0	0
EGFEM1	0	0	0	0	0	0	1	0	0
EGLN1	0	0	0	0	0	0	0	1	0
EGR2	0	0	0	1	0	0	0	0	0
EGR4	0	0	0	1	0	0	0	1	0
EHBP1L1	0	0	0	0	0	0	0	1	0
EHF	0	0	1	0	0	0	0	0	0
EHMT2	0	0	0	0	0	0	0	1	0
EI24	0	0	1	0	0	0	0	0	0
EID2	0	0	0	0	0	0	0	1	0
EID3	0	0	1	0	0	0	0	0	0
EIF2AK3	0	0	0	0	0	0	0	1	0
EIF2B5	0	0	0	0	0	0	0	1	0
EIF3A	0	0	0	0	0	0	0	1	0
EIF3B	0	0	0	0	0	0	0	1	0
EIF3F	0	0	0	0	0	0	0	1	0
EIF3G	0	0	0	0	0	0	0	1	0
EIF3J1	0	0	0	0	0	0	0	1	0
EIF4E	0	0	0	0	0	0	0	1	0
EIF4E3	1	0	0	0	0	0	0	1	0
EIF4ENIF1	0	0	0	0	0	1	0	0	0
EIF4G3	0	0	0	0	0	0	0	1	0
EIF4H	0	0	0	0	0	0	0	1	0
ELAVL3	1	0	0	1	0	0	0	1	0
ELAVL4	0	0	0	0	0	0	0	1	0
ELF2	0	0	0	0	0	0	0	1	0
ELFN1	0	0	0	1	0	0	0	0	0
ELFN2	0	0	0	1	0	0	0	1	0
ELK4	0	0	0	0	0	0	1	0	0
ELL	0	0	1	0	0	0	0	0	0
ELMOD1	0	0	0	0	0	0	0	1	0
ELMOD2	0	0	0	0	0	0	0	1	0
ELMSAN1	0	0	0	0	0	1	0	0	0
ELOA	0	0	0	0	0	0	0	1	0
ELOBL	0	0	0	0	0	1	0	0	0
ELOVL1	0	0	0	0	0	1	0	0	0
ELOVL2	0	1	0	0	0	0	0	0	0
ELOVL4	0	0	0	0	0	0	0	1	0
ELOVL6	1	0	0	0	0	0	0	0	0
ELP5	0	0	0	0	0	0	0	1	0
EMC8	0	0	0	0	0	0	0	1	0
EMC9	0	0	0	0	0	1	0	0	0
EME1	0	0	0	0	0	0	1	1	0
EMID1	0	0	0	1	0	0	0	0	0
EMILIN2	0	0	0	0	0	0	0	1	0
EMILIN3	0	0	0	1	0	0	0	1	0
EML4	0	0	0	0	0	0	0	1	0
EML5	1	0	0	0	0	0	0	1	0
EMP2	1	0	0	0	0	0	0	0	0
EMX1	0	0	0	1	0	0	0	1	0
EMX2	0	0	0	1	0	0	0	1	0
EN1	0	0	0	1	0	0	0	1	0
EN2	0	0	0	1	0	0	0	0	0
ENDOD1	0	0	0	0	0	0	0	1	0
ENDOG	0	0	0	0	0	0	0	1	0
ENGASE	0	0	0	0	0	0	1	0	0
ENKUR	0	0	1	0	0	0	0	0	0
ENO2	0	0	0	0	0	1	0	0	0
ENOX1	0	0	0	0	0	0	0	1	0
ENPEP	0	1	0	0	0	0	0	0	0
ENTPD3	0	0	0	1	0	0	1	1	0
EOMES	0	0	0	1	0	0	0	1	0
EPB41L1	1	0	0	0	0	0	0	0	0
EPB41L4A	0	0	0	1	0	0	0	0	0
EPB41L4B	0	0	0	0	0	0	0	1	0
EPC2	0	0	0	0	0	0	0	1	0
EPCAM	0	0	0	0	0	0	0	1	0
EPHA4	0	0	0	0	0	1	1	1	0
EPHA5	0	0	0	0	0	0	1	1	0
EPHA8	0	0	0	1	0	0	0	0	0
EPHB1	0	0	0	1	0	0	0	0	0
EPHB2	0	0	0	1	0	0	0	0	0
EPHB6	0	0	0	0	0	0	0	1	0
EPHX4	0	0	0	1	0	0	0	1	0
EPN2	0	0	0	0	0	0	0	1	0
EPOP	0	0	0	0	0	0	0	1	0
EPP13	1	1	0	0	0	0	0	0	0
EPRS	0	0	0	0	0	0	0	1	0
EPS15	0	0	0	0	0	0	0	1	0
EPS15L1	0	0	0	0	0	1	0	0	0
EPS8L2	0	0	1	0	0	0	0	0	0
EPS8L3	0	0	0	0	0	1	0	0	0
ERBB4	1	0	0	0	0	0	0	0	0
ERBIN	0	0	0	0	0	0	0	1	0
ERC2	1	0	0	0	0	0	1	0	0
ERCC1	0	0	0	1	0	0	0	0	0
ERCC3	0	0	1	0	0	0	0	0	0
ERCC6L2	0	0	0	0	0	0	0	1	0
ERFE	0	0	0	0	0	1	0	1	0
ERGIC2	0	0	0	0	0	0	0	1	0
ERI1	0	0	0	0	0	0	0	1	0
ERI3	0	0	0	0	0	0	0	1	0
ERICH2	0	0	0	0	0	0	0	1	0
ERICH3	0	0	0	0	0	0	1	0	0
ERICH6	0	0	0	0	0	1	0	0	0
ERMP1	0	0	0	0	0	0	0	1	0
ERN1	0	0	0	0	0	0	0	1	0
ERO1L	0	0	0	0	0	0	0	1	0
ERP27	1	0	0	0	0	0	0	0	0
ESCO1	0	0	0	0	0	0	0	1	0
ESPNL	1	0	0	0	0	0	0	0	0
ESR1	0	0	0	0	0	1	0	0	0
ESYT2	0	0	0	0	0	0	0	1	0
ETAA1	0	0	0	0	0	0	0	1	0
ETV3	0	0	0	0	0	0	0	1	0
EVC	0	0	0	1	0	0	1	0	0
EVC2	0	0	0	1	0	0	1	0	0
EVI2	0	0	1	0	0	0	0	0	0
EVX1	0	0	0	1	0	0	0	1	0
EVX2	0	0	0	1	0	1	0	0	0
EXO1	0	0	1	0	0	0	0	0	0
EXOC2	0	0	0	0	0	0	0	1	0
EXOSC3	0	0	0	0	0	0	0	1	0
EXOSC6	0	0	0	0	0	0	0	1	0
EXPH5	1	0	1	0	0	0	0	0	0
EXT2	0	0	0	0	0	0	0	1	0
EXTL3	0	0	1	0	0	0	0	0	0
EYA1	0	0	0	0	0	0	0	1	0
EYA2	0	0	0	1	0	0	0	0	0
EYA4	0	0	0	1	0	0	0	1	0
EZH1	0	0	1	0	0	1	0	1	0
F13A1	0	0	0	0	0	0	1	0	0
F8A	0	0	0	0	0	0	0	1	0
F930015N05RIK	0	0	0	0	0	0	0	1	0
FA2H	0	0	0	0	0	0	0	1	0
FABP1	0	0	1	0	0	0	0	0	0
FADS6	0	0	1	0	0	0	0	0	0
FAM104A	0	0	0	0	0	0	0	1	0
FAM107A	0	0	0	1	0	0	0	0	0
FAM109A	0	0	1	0	0	0	0	0	0
FAM110B	0	0	0	0	0	0	0	1	0
FAM117B	0	0	0	0	0	0	0	1	0
FAM122C	0	0	0	0	0	1	0	0	0
FAM124A	1	0	0	0	0	0	0	0	0
FAM129C	0	0	0	0	0	2	0	0	0
FAM133B	0	0	0	0	0	0	0	1	0
FAM135A	0	0	0	0	0	0	0	1	0
FAM13B	0	0	0	0	0	0	0	1	0
FAM155A	0	0	0	0	0	0	0	1	0
FAM159A	0	0	0	0	0	2	0	1	0
FAM163A	0	0	0	0	0	0	1	0	0
FAM163B	0	0	0	0	0	0	0	1	0
FAM170B	0	0	0	0	0	1	0	0	0
FAM174A	0	0	0	0	0	0	0	1	0
FAM174B	1	0	0	0	0	0	1	0	0
FAM180A	0	0	1	0	0	0	1	0	0
FAM181B	1	0	0	0	0	0	0	1	0
FAM189A1	0	0	0	0	0	0	1	1	0
FAM189A2	0	0	0	0	0	0	0	1	0
FAM193A	0	0	0	0	0	0	0	1	0
FAM196A	0	0	0	0	0	1	0	1	0
FAM198A	1	0	1	0	0	0	0	0	0
FAM198B	0	0	0	0	0	0	1	0	0
FAM19A2	0	0	0	1	0	0	0	1	0
FAM19A4	0	0	0	1	0	0	0	0	0
FAM19A5	0	0	0	0	0	0	0	1	0
FAM204A	0	0	1	0	0	0	0	0	0
FAM212B	0	0	0	0	0	0	1	0	0
FAM214B	0	0	1	0	0	0	0	0	0
FAM219A	0	0	0	0	0	0	0	1	0
FAM222A	0	0	0	0	0	0	0	1	0
FAM26E	1	0	0	0	0	0	0	0	0
FAM26F	1	0	0	0	0	0	0	0	0
FAM32A	1	0	0	0	0	0	0	0	0
FAM3C	0	0	0	0	0	0	0	1	0
FAM43B	0	0	0	1	0	0	0	1	0
FAM46A	0	1	0	0	0	0	0	0	0
FAM49B	0	0	0	0	0	0	0	1	0
FAM60A	0	0	0	0	0	0	0	1	0
FAM69B	0	0	0	0	0	0	0	1	0
FAM69C	0	0	0	1	0	0	0	0	0
FAM78B	0	0	0	0	0	0	0	1	0
FAM83A	1	0	1	0	0	0	0	0	0
FAM83B	0	0	0	0	0	0	0	1	0
FAM83E	1	0	0	0	0	0	0	0	0
FAM84B	0	0	0	0	0	1	1	0	0
FAM89B	0	0	0	0	0	0	0	1	0
FAM92A	0	0	0	0	0	0	0	1	0
FAM92B	0	0	0	1	0	0	0	0	0
FAM98C	1	0	0	0	0	0	0	1	0
FANCE	0	0	0	0	0	0	0	1	0
[truncated: 5,369 more rows]

## Sheet: SupTable3b
Supplemental Table 3b: Promoter-region LAAsP-mods linked to LAAsP genes from '10mo Aged Veh over 5mo Adult Veh' comparison (Figure 4c)
Number of peaks for each histone mark near DEGs (TSS +/-3kb)
Genes	Peak count for H3K27ac up peaks	Peak count for H3K4me1 up peaks	Peak count for H3K4me3 up peaks	Peak count for H3K27me3 down peaks	M liver LAAsP genes (5mo to 10mo)	Peak count for H3K27ac down peaks	Peak count for H3K4me1 down peaks	Peak count for H3K4me3 down peaks	Peak count for H3K27me3 up peaks
GM10036	0	0	0	0	4.71818	0	0	0	0
MT-ND3	0	0	0	0	3.79332	0	0	0	0
RPL9-PS6	0	0	0	0	3.5286	0	0	0	0
GM12751	0	0	0	0	3.14948	0	0	0	0
GM15501	0	0	0	0	2.95819	0	0	0	0
RPS10-PS2	0	0	0	0	2.6485	0	0	0	0
MT-TQ	0	0	0	0	2.60392	0	0	0	0
GM28438	0	0	0	0	2.58753	0	0	0	0
GM7536	0	0	0	0	2.46756	0	0	0	0
RPL17-PS5	0	0	0	0	2.4076	0	0	0	0
GM24336	0	0	0	0	2.36961	0	0	0	0
GM10680	0	0	0	0	2.28207	0	0	0	0
GM13577	0	0	0	0	2.21482	0	0	0	0
RPS12-PS4	0	0	0	0	2.0697	0	0	0	0
GM4149	0	0	0	0	2.04151	0	0	0	0
ZFP992	0	0	0	0	2.04019	0	0	0	0
SNORA78	0	0	0	0	2.03723	0	0	0	0
TES3-PS	0	0	0	0	2.03052	0	0	0	0
MT-TT	0	0	0	0	1.99672	0	0	0	0
MIR703	0	0	0	0	1.98373	0	0	0	0
GM9843	0	0	0	0	1.97875	0	0	0	0
GM10076	0	0	0	0	1.94886	0	0	0	0
GM10123	0	0	0	0	1.84824	0	0	0	0
GM22154	0	0	0	0	1.84141	0	0	0	0
GM13339	0	0	0	0	1.83053	0	0	0	0
MT-TW	0	0	0	0	1.81629	0	0	0	0
ZFP979	0	0	0	0	1.78635	0	0	0	0
H3F3A	0	0	0	0	1.76627	0	0	0	0
GM22513	0	0	0	0	1.76567	0	0	0	0
EIF3J2	0	0	0	0	1.71936	0	0	0	0
RPL10-PS3	0	0	0	0	1.71031	0	0	0	0
GM8730	0	0	0	0	1.70591	0	0	0	0
GM3699	0	0	0	0	1.69071	0	0	0	0
LSM7	0	0	0	0	1.68601	0	0	0	0
GM10925	0	0	0	0	1.6829	0	0	0	0
ATP5L	0	0	0	0	1.68209	0	0	0	0
NDUFS5	0	0	0	0	1.63942	0	0	0	0
GM31121	0	0	0	0	1.63038	0	0	0	0
GM28437	0	0	0	0	1.61752	0	0	0	0
RPL34-PS1	0	0	0	0	1.60582	0	0	0	0
GM6136	0	0	0	0	1.60389	0	0	0	0
CDH18	0	0	0	0	1.6018	0	0	0	0
SEC61G	0	0	0	0	1.59568	0	0	0	0
GM11361	0	0	0	0	1.59163	0	0	0	0
RPL36-PS12	0	0	0	0	1.583	0	0	0	0
GM5905	0	0	0	0	1.56536	0	0	0	0
GM48702	0	0	0	0	1.55896	0	0	0	0
GM25394	0	0	0	0	1.53654	0	0	0	0
RPS3A2	0	0	0	0	1.5244	0	0	0	0
B430119L08RIK	0	0	0	0	1.51905	0	0	0	0
GM8430	0	0	0	0	1.51812	0	0	0	0
RPL9	0	0	0	0	1.51332	0	0	0	0
GM6135	0	0	0	0	1.51323	0	0	0	0
GM10288	0	0	0	0	1.51128	0	0	0	0
MUP-PS19	0	0	0	0	1.50881	0	0	0	0
GM44096	0	0	0	0	1.47987	0	0	0	0
SCARNA13	0	0	0	0	1.46735	0	0	0	0
TERC	0	0	0	0	1.46061	0	0	0	0
GM1821	0	0	0	0	1.45425	0	0	0	0
GM49024	0	0	0	0	1.44857	0	0	0	0
GM40923	0	0	0	0	1.43889	0	0	0	0
RPS23-PS1	0	0	0	0	1.43789	0	0	0	0
GM8451	0	0	0	0	1.43007	0	0	0	0
ERH	0	0	0	0	1.42629	0	0	0	0
JCHAIN	0	0	0	0	1.41852	0	0	0	0
GM14327	0	0	0	0	1.41278	0	0	0	0
RPS6-PS4	0	0	0	0	1.41256	0	0	0	0
RNU3A	0	0	0	0	1.40436	0	0	0	0
RPS18-PS3	0	0	0	0	1.38039	0	0	0	0
RPL27	0	0	0	0	1.37723	0	0	0	0
DMRTA1	0	0	0	0	1.37274	0	0	0	0
GM15401	0	0	0	0	1.3614	0	0	0	0
SNORA74A	0	0	0	0	1.35971	0	0	0	0
NDUFB4	0	0	0	0	1.35805	0	0	0	0
GM15459	0	0	0	0	1.35661	0	0	0	0
GPX4-PS2	0	0	0	0	1.34633	0	0	0	0
CCDC152	0	0	0	0	1.3394	0	0	0	0
RPL3-PS1	0	0	0	0	1.33519	0	0	0	0
RPL17	0	0	0	0	1.30507	0	0	0	0
GM15500	0	0	0	0	1.30343	0	0	0	0
GM22009	0	0	0	0	1.29686	0	0	0	0
PPP1R3C	0	0	0	0	1.28765	0	0	0	0
GM36041	0	0	0	0	1.28492	0	0	0	0
GM22486	0	0	0	0	1.28001	0	0	0	0
GM22442	0	0	0	0	1.26564	0	0	0	0
HECTD2OS	0	0	0	0	1.26298	0	0	0	0
GM25788	0	0	0	0	1.25609	0	0	0	0
SCARNA6	0	0	0	0	1.24825	0	0	0	0
HSF2BP	0	0	0	0	1.24728	0	0	0	0
RPL19-PS11	0	0	0	0	1.24109	0	0	0	0
RPS27RT	0	0	0	0	1.23367	0	0	0	0
RPL5	0	0	0	0	1.2331	0	0	0	0
TIMM23	0	0	0	0	1.2312	0	0	0	0
TEX12	0	0	1	0	1.23002	0	0	0	0
SULT2A7	0	0	0	0	1.21871	0	0	0	0
BRI3	0	0	0	0	1.20913	0	0	0	0
GM47544	0	0	0	0	1.20489	0	0	0	0
RPL36A-PS2	0	0	0	0	1.20307	0	0	0	0
GPX4	0	0	0	0	1.20153	0	0	0	0
OAZ1	0	0	0	0	1.18026	0	0	0	0
4632427E13RIK	0	0	0	0	1.17742	0	0	0	0
GM4045	0	0	0	0	1.1436	0	0	0	0
GT(ROSA)26SOR	0	0	0	0	1.13885	0	0	0	0
SERPINB1A	0	0	0	0	1.13372	0	0	0	0
POLR2K	0	0	0	0	1.12927	0	0	0	0
GM43449	0	0	0	0	1.12755	0	0	0	0
GM12265	0	0	0	0	1.12437	0	0	0	0
GM29216	0	0	0	0	1.1225	0	0	0	0
UBA52	0	0	0	0	1.12096	0	0	0	0
IMMP1L	0	0	0	0	1.11687	0	0	0	0
MT-CO3	0	0	0	0	1.11498	0	0	0	0
A330069E16RIK	0	0	0	0	1.11422	0	0	0	0
TOMM5	0	0	0	0	1.11421	0	0	0	0
KCNQ1OT1	0	0	0	0	1.11228	0	0	0	0
C730002L08RIK	0	0	0	0	1.11068	0	0	0	0
SNORD104	0	0	0	0	1.1099	0	0	0	0
OAZ1-PS	0	0	0	0	1.10983	0	0	0	0
RPS16	0	0	0	0	1.10583	0	0	0	0
HIST1H4B	0	0	0	0	1.10101	0	0	0	0
GM6170	0	0	0	0	1.09243	0	0	0	0
DNAJC15	0	0	0	0	1.08924	0	0	0	0
ACNAT2	0	0	0	0	1.08889	0	0	0	0
GM25835	0	0	0	0	1.08337	0	0	0	0
GM12231	0	0	0	0	1.0783	0	0	0	0
GM36435	0	0	0	0	1.07598	0	0	0	0
RPL27A	0	0	0	0	1.07576	0	0	0	0
RPL41	0	0	0	0	1.07567	0	0	0	0
RN7SK	0	0	0	0	1.0728	0	0	0	0
MT-RNR2	0	0	0	0	1.06714	0	0	0	0
GM6863	0	0	0	0	1.06192	0	0	0	0
RPL35	0	0	0	0	1.06087	0	0	0	0
WFDC2	0	0	0	0	1.05519	0	0	0	0
MT-TP	0	0	0	0	1.04845	0	0	0	0
MRPL23	0	0	0	0	1.04713	0	0	0	0
ZNF41-PS	0	0	0	0	1.0462	0	0	0	0
RNF125	0	0	0	0	1.03838	0	0	0	0
GM37336	0	0	0	0	1.03823	0	0	0	0
SLC17A8	0	0	0	0	1.03683	0	0	0	0
GM22422	0	0	0	0	1.03546	0	0	0	0
GM10736	0	0	0	0	1.03258	0	0	0	0
RAN	0	0	0	0	1.03237	0	0	0	0
LONRF3	0	0	0	0	1.03233	0	0	0	0
ZNHIT3	0	0	0	0	1.03114	0	0	0	0
RPS24	0	0	0	0	1.03003	0	0	0	0
TRHDE	2	0	1	0	1.02954	0	0	0	0
GM13021	0	0	0	0	1.02193	0	0	0	0
GM25117	0	0	0	0	1.02112	0	0	0	0
L3HYPDH	0	0	0	0	1.01996	0	0	0	0
RPL19	0	0	0	0	1.01974	0	0	0	0
B3GALNT1	0	0	0	0	1.01716	0	0	0	0
CHRNA1OS	0	0	0	0	1.01646	0	0	0	0
BLOC1S2	0	0	0	0	1.01426	0	0	0	0
PFDN5	0	0	0	0	1.01031	0	0	0	0
GM36028	0	0	0	0	1.00766	0	0	0	0
RPAIN	0	0	0	0	1.00341	0	0	0	0
GM34654	0	0	0	0	1.00277	0	0	0	0
PDCD10	0	0	0	0	1.00055	0	0	0	0
RPS8	0	0	0	0	0.997611	0	0	0	0
GM13456	0	0	0	0	0.996503	0	0	0	0
GM34777	0	0	0	0	0.993751	0	0	0	0
MIR99AHG	0	0	0	0	0.990216	0	0	0	0
LEAP2	0	0	0	0	0.990012	0	0	0	0
AC135964.2	0	0	0	0	0.987432	0	0	0	0
CIB2	0	0	0	0	0.98723	0	0	0	0
PLATR4	0	0	0	0	0.98613	0	0	0	0
5033403H07RIK	0	0	0	0	0.98259	0	0	0	0
USMG5	0	0	0	0	0.981374	0	0	0	0
FCOR	0	0	0	0	0.979874	0	0	0	0
RPL11	0	0	0	0	0.979293	0	0	0	0
CAR8	0	0	0	0	0.978652	0	0	0	0
1110065P20RIK	0	0	0	0	0.973242	0	0	0	0
GM44744	0	0	0	0	0.97125	0	0	0	0
6720427I07RIK	0	0	0	0	0.968872	0	0	0	0
ACYP2	0	0	0	0	0.963765	0	0	0	0
MIR22HG	0	0	0	0	0.960085	0	0	0	0
BC002163	0	0	0	0	0.959543	0	0	0	0
MRPS33	0	0	0	0	0.955152	0	0	0	0
RPL35A	0	0	0	0	0.954354	0	0	0	0
MRPL14	0	0	0	0	0.952094	0	0	0	0
MRPL23-PS1	0	0	0	0	0.951102	0	0	0	0
2900076A07RIK	0	0	0	0	0.950492	0	0	0	0
SPAG4	0	0	0	0	0.94995	0	0	0	0
CT010467.1	0	0	0	0	0.948109	0	0	0	0
HSPE1	0	0	0	0	0.948013	0	0	0	0
RPA3	0	0	0	0	0.945505	0	0	0	0
2410006H16RIK	0	0	0	0	0.940893	0	0	0	0
SFT2D1	0	0	0	0	0.938202	0	0	0	0
PPIH	0	0	0	0	0.936503	0	0	0	0
RPS7	0	0	0	0	0.933789	0	0	0	0
BTF3	0	0	0	0	0.933353	0	0	0	0
GABARAPL2	0	0	0	0	0.932835	0	0	0	0
SNRPD1	0	0	0	0	0.932415	0	0	0	0
GM22973	0	0	0	0	0.932319	0	0	0	0
4430402I18RIK	0	0	0	0	0.928492	0	0	0	0
NSA2	0	0	0	0	0.927758	0	0	0	0
CCL27A	0	0	0	0	0.92622	0	0	0	0
NDUFAF2	0	0	0	0	0.926034	0	0	0	0
CCDC115	0	0	0	0	0.923895	0	0	0	0
ZFP931	0	0	0	0	0.919319	0	0	0	0
GGACT	0	0	0	0	0.919052	0	0	0	0
CCDC162	0	0	0	0	0.918354	0	0	0	0
TMED2	0	0	0	0	0.918066	0	0	0	0
A930001C03RIK	0	0	0	0	0.917913	0	0	0	0
CD59A	0	0	0	0	0.917479	0	0	0	0
SERPINA12	0	0	0	0	0.917178	0	0	0	0
RPS12	0	0	0	0	0.912004	0	0	0	0
GM7331	0	0	0	0	0.910052	0	0	0	0
VMO1	0	0	0	0	0.908679	0	0	0	0
KBTBD3	0	0	0	0	0.908309	0	0	0	0
MAN2C1OS	0	0	0	0	0.904461	0	0	0	0
FAU	0	0	0	0	0.900001	0	0	0	0
RPL36	0	0	0	0	0.899193	0	0	0	0
ACYP1	0	0	0	0	0.89696	0	0	0	0
NPM3	0	0	0	0	0.89621	0	0	0	0
IGHM	0	0	0	0	0.895455	0	0	0	0
MT-TA	0	0	0	0	0.895258	0	0	0	0
RPL34	0	0	0	0	0.894229	0	0	0	0
GM6767	0	0	0	0	0.887901	0	0	0	0
GM7609	0	0	0	0	0.887646	0	0	0	0
AP3S1	0	0	0	0	0.885401	0	0	0	0
GM5869	0	0	0	0	0.885096	0	0	0	0
C330013E15RIK	0	0	0	0	0.883307	0	0	0	0
RNF7	0	0	0	0	0.882316	0	0	0	0
ATP6V1G1	0	0	0	0	0.882188	0	0	0	0
GM8355	0	0	0	0	0.88122	0	0	0	0
ANGPTL8	0	0	0	0	0.874101	0	0	0	0
TMA7	0	0	0	0	0.872881	0	0	0	0
WFDC17	0	0	0	0	0.866192	1	0	1	0
CDH2	0	0	0	0	0.865584	0	0	0	0
GM8186	0	0	0	0	0.863876	0	0	0	0
COPS9	0	0	0	0	0.863404	0	0	0	0
ZC3H6	0	0	0	0	0.862864	0	0	0	0
RPS13-PS2	0	0	0	0	0.861493	0	0	0	0
CHCHD1	0	0	0	0	0.861295	0	0	0	0
RPS6	0	0	0	0	0.861046	0	0	0	0
GM26448	0	0	0	0	0.859787	0	0	0	0
BC051226	0	0	0	0	0.855332	0	0	0	0
COMMD6	0	0	0	0	0.852533	0	0	0	0
RPS13	0	0	0	0	0.851676	0	0	0	0
GM43189	0	0	0	0	0.847629	0	0	0	0
HNF4AOS	0	0	0	0	0.846451	0	0	0	0
EEF1A1	0	0	0	0	0.844438	0	0	0	0
GUK1	0	0	0	0	0.844202	0	0	0	0
RPS23	0	0	0	0	0.843299	0	0	0	0
POP5	0	0	0	0	0.843183	0	0	0	0
RPS16-PS2	0	0	0	0	0.839611	0	0	0	0
SNRNP27	0	0	0	0	0.837604	0	0	0	0
PCBD2	0	0	0	0	0.836292	0	0	0	0
IRX1	2	0	0	0	0.835922	0	0	0	0
ASIC5	0	0	0	0	0.835655	0	0	0	0
PSMB5	0	0	0	0	0.835593	0	0	0	0
IGKC	0	0	0	0	0.832482	0	0	0	0
ZFAS1	0	0	0	0	0.830544	0	0	0	0
2010001A14RIK	0	0	0	0	0.829086	0	0	0	0
9430038I01RIK	0	0	0	0	0.828678	0	0	0	0
5033421B08RIK	0	0	0	0	0.82804	0	0	0	0
GM16062	0	0	0	0	0.827569	0	0	0	0
OBP2A	0	0	0	0	0.827264	0	0	0	0
POLR2L	0	0	0	0	0.823456	0	0	0	0
KBTBD12	1	0	0	0	0.822134	0	0	0	0
A330023F24RIK	0	0	0	0	0.821955	0	0	0	0
RPS25-PS1	0	0	0	0	0.821329	0	0	0	0
GM15590	0	0	0	0	0.820165	0	0	0	0
MTHFSL	0	0	0	0	0.820156	0	0	0	0
CAMK1	0	0	0	0	0.819601	0	0	0	0
LRTM1	0	0	1	0	0.818924	0	0	0	0
SLC33A1	0	0	0	0	0.817823	0	0	0	0
RPS14	0	0	0	0	0.817518	0	0	0	0
GM15417	0	0	0	0	0.816079	0	0	0	0
9330162012RIK	0	0	0	0	0.815614	0	0	0	0
PIGYL	0	0	0	0	0.81457	0	0	0	0
CYP2B9	0	0	0	0	0.812079	0	0	0	0
GM8566	0	0	0	0	0.811891	0	0	0	0
MPC2	0	0	0	0	0.811819	0	0	0	0
RPS19	0	0	0	0	0.809893	0	0	0	0
PEBP1	0	0	0	0	0.807516	0	0	0	0
CEBPZOS	0	0	0	0	0.806168	0	0	0	0
SCARNA2	0	0	0	0	0.804425	0	0	0	0
TMEM160	0	0	0	0	0.803664	0	0	0	0
GM6472	0	0	0	0	0.800739	0	0	0	0
MRPL41	0	0	0	0	0.798998	0	0	0	0
MRPL28	0	0	0	0	0.797321	0	0	0	0
RAD51B	0	0	0	0	0.796669	0	0	0	0
TOMM20	0	0	0	0	0.795809	0	0	0	0
9030616G12RIK	0	0	0	0	0.795721	0	0	0	0
PRORSD1	0	0	0	0	0.795319	0	0	0	0
RN7S1	0	0	0	0	0.79526	0	0	0	0
2810001G20RIK	0	0	0	0	0.79416	0	0	0	0
RPS9	0	0	0	0	0.793557	0	0	0	0
2510046G10RIK	0	0	0	0	0.792943	0	0	0	0
CD9	0	0	0	0	0.791038	0	0	0	0
RPLP0	0	0	0	0	0.79079	0	0	0	0
SLC22A27	2	0	0	0	0.787801	0	0	0	0
PSMA7	0	0	0	0	0.786648	0	0	0	0
COX7C	0	0	0	0	0.785298	0	0	0	0
GM25360	0	0	0	0	0.784224	0	0	0	0
ZFP53	0	0	0	0	0.783713	0	0	0	0
ZFP982	0	0	0	0	0.780258	0	0	0	0
SERF1	0	0	0	0	0.778569	0	0	0	0
GM2000	0	0	0	0	0.778514	0	0	0	0
GM35986	0	0	0	0	0.778042	0	0	0	0
GTF2A2	0	0	0	0	0.776018	0	0	0	0
GM40787	0	0	0	0	0.773768	0	0	0	0
C1D	0	0	0	0	0.773523	0	0	0	0
4930524O07RIK	0	0	0	0	0.771229	0	0	0	0
PLEKHJ1	0	0	0	0	0.768546	0	0	0	0
RPS18	0	0	0	0	0.768377	0	0	0	0
SPC24	0	0	0	0	0.767938	0	0	0	0
GM25291	0	0	0	0	0.767479	0	0	0	0
PPP1R35	0	0	0	0	0.764605	0	0	0	0
BLVRB	0	0	0	0	0.764185	0	0	0	0
GM42067	0	0	0	0	0.764062	0	0	0	0
CCDC107	0	0	0	0	0.763067	0	0	0	0
GM11423	0	0	0	0	0.761847	0	0	0	0
CT027991.1	0	0	0	0	0.761022	0	0	0	0
MUP20	0	0	0	0	0.76052	0	0	0	0
IFT20	0	0	0	0	0.759709	0	0	0	0
A430005L14RIK	0	0	0	0	0.758838	0	0	0	0
MPC1	0	0	0	0	0.758477	0	0	0	0
PDK4	0	0	0	0	0.755307	0	0	0	0
GM4285	0	0	0	0	0.755236	0	0	0	0
TRIAP1	0	0	0	0	0.754979	0	0	0	0
MAPK15	0	0	0	0	0.752543	0	0	0	0
DGCR6	1	0	0	0	0.752483	0	0	0	0
OXLD1	0	0	0	0	0.752193	0	0	0	0
SELENOF	0	0	0	0	0.751588	0	0	0	0
GM12909	0	0	0	0	0.751355	0	0	0	0
9630013D21RIK	0	0	0	0	0.751223	0	0	0	0
TAF1D	0	0	0	0	0.751183	0	0	0	0
RPL32	0	0	0	0	0.748651	0	0	0	0
RAB17	0	0	0	0	0.74859	0	0	0	0
ATP6V0B	0	0	0	0	0.748484	0	0	0	0
ATP5E	0	0	0	0	0.745885	0	0	0	0
OLFR1033	0	0	0	0	0.745567	0	0	0	0
PPP1R2	0	0	0	0	0.743569	0	0	0	0
TMEM256	0	0	0	0	0.742953	0	0	0	0
2210039B01RIK	0	0	0	0	0.742292	0	0	0	0
C330021F23RIK	0	0	0	0	0.740133	0	0	0	0
DTYMK	0	0	0	0	0.738257	0	0	0	0
MED21	0	0	0	0	0.736805	0	0	0	0
ARRDC3	0	0	0	0	0.734998	0	0	0	0
GM11992	0	0	0	0	0.734928	0	0	0	0
SNHG14	0	0	0	0	0.73401	0	0	0	0
PTGES3	0	0	0	0	0.733543	0	0	0	0
FOPNL	0	0	0	0	0.733052	0	0	0	0
KHK	0	0	0	0	0.733007	0	0	0	0
RWDD1	0	0	0	0	0.732169	0	0	0	0
COMMD2	0	0	0	0	0.731791	0	0	0	0
CIAO2A	0	0	0	0	0.729775	0	0	0	0
AVPI1	0	0	0	0	0.72878	0	0	0	0
DCTPP1	0	0	0	0	0.728457	0	0	0	0
GM40040	0	0	0	0	0.727587	0	0	0	0
MREG	0	0	0	0	0.726749	0	0	0	0
GM12481	0	0	0	0	0.725824	0	0	0	0
MZT1	0	0	0	0	0.725522	0	0	0	0
HYI	0	0	0	0	0.725129	0	0	0	0
RPS15	0	0	0	0	0.725047	0	0	0	0
ZFYVE21	0	0	0	0	0.724214	0	0	0	0
FAHD2A	0	0	0	0	0.724137	0	0	0	0
RPL28-PS1	0	0	0	0	0.722062	0	0	0	0
GM31583	0	0	0	0	0.721659	0	0	0	0
KRT10	0	0	0	0	0.721642	0	0	0	0
GDF15	0	0	0	0	0.721227	0	0	0	0
GM17196	0	0	0	0	0.719485	0	0	0	0
TIMM13	0	0	0	0	0.71895	1	0	0	0
HIST1H4C	0	0	0	0	0.718626	0	0	0	0
PHB	0	0	0	0	0.718536	0	0	0	0
RPS3	0	0	0	0	0.718356	0	0	0	0
NEAT1	0	0	0	0	0.718137	0	0	0	0
PLD6	0	0	0	0	0.717884	0	0	0	0
PGM5	0	0	0	0	0.717293	0	0	0	0
5930430L01RIK	0	0	0	0	0.716345	0	0	0	0
PPIL1	0	0	0	0	0.716206	0	0	0	0
PCNP	0	0	0	0	0.715497	0	0	0	0
TMEM14C	0	0	0	0	0.715231	0	0	0	0
CYP2J9	0	0	0	0	0.714719	0	0	0	0
GM12338	0	0	0	0	0.712661	0	0	0	0
AKR1C20	0	0	0	0	0.711283	0	0	0	0
D130043K22RIK	0	0	0	0	0.710652	0	0	0	0
FBXW9	0	0	0	0	0.709502	0	0	0	0
GM47465	0	0	0	0	0.708138	0	0	0	0
AC151289.1	0	0	0	0	0.708099	0	0	0	0
MALAT1	0	0	0	0	0.706714	0	0	0	0
CRY1	0	0	0	0	0.704497	0	0	0	0
PTS	0	0	0	0	0.703452	0	0	0	0
PPCS	0	0	0	0	0.702551	0	0	0	0
LNCBATE1	0	0	0	0	0.702294	0	0	0	0
CRLS1	0	0	0	0	0.701742	0	0	0	0
CES1D	0	0	1	0	0.701686	0	0	0	0
SMS	0	0	0	0	0.700891	0	0	0	0
TMEM141	0	0	0	0	0.70075	0	0	0	0
NDUFAF6	0	0	0	0	0.699164	0	0	0	0
CCDC122	0	0	0	0	0.698576	0	0	0	0
MRPL46	0	0	0	0	0.696636	0	0	0	0
NIT2	0	0	0	0	0.696414	0	0	0	0
HAX1	0	0	0	0	0.696043	0	0	0	0
FITM1	0	0	0	0	0.695654	0	0	0	0
PIN4	0	0	0	0	0.695547	0	0	0	0
RPL10A	0	0	0	0	0.694884	0	0	0	0
D630033O11RIK	0	0	0	0	0.694537	0	0	0	0
ZAP70	0	0	0	0	0.69248	0	0	1	0
S100A1	0	0	0	0	0.691732	0	0	0	0
RPS27A	0	0	0	0	0.691174	0	0	0	0
4930522L14RIK	0	0	0	0	0.69115	0	0	0	0
ANAPC11	0	0	0	0	0.690597	0	0	0	0
4732419C18RIK	0	0	0	0	0.690205	0	0	0	0
FAM241B	0	0	0	0	0.68997	0	0	0	0
SERPINA7	1	0	0	0	0.689889	0	0	0	0
GM14418	0	0	0	0	0.688915	0	0	0	0
GM20522	0	0	0	0	0.688038	0	0	0	0
1810032O08RIK	0	0	0	0	0.684959	0	0	0	0
UQCR11	0	0	0	0	0.684197	0	0	0	0
E030030I06RIK	0	0	0	0	0.68283	0	0	0	0
MTHFD2L	0	0	0	0	0.682515	0	0	0	0
HIST1H4D	0	0	0	0	0.681842	0	0	0	0
PSMD10	0	0	0	0	0.681561	0	0	0	0
PAM16	0	0	0	0	0.679425	0	0	0	0
ZFAND4	0	0	0	0	0.677505	0	0	0	0
BHMT-PS1	0	0	0	0	0.677409	0	0	0	0
TMED1	0	0	0	0	0.676729	0	0	0	0
PLCXD1	0	0	0	0	0.676657	0	0	0	0
MDP1	0	0	0	0	0.676606	0	0	0	0
GM13394	0	0	0	0	0.676479	0	0	0	0
AQP8	0	0	0	0	0.676421	0	0	0	0
2610306M01RIK	0	0	0	0	0.676179	0	0	0	0
DKK4	0	0	0	0	0.675742	0	0	0	0
ACSS3	1	0	0	0	0.674644	0	0	0	0
GM10275	0	0	0	0	0.674533	0	0	0	0
MINDY3	0	0	0	0	0.674278	0	0	0	0
AC132455.2	0	0	0	0	0.673613	0	0	0	0
1600020E01RIK	0	0	0	0	0.672315	0	0	0	0
STARD3NL	0	0	0	0	0.671889	0	0	0	0
CYP2D40	0	0	0	0	0.671304	0	0	0	0
HIST1H1E	0	0	0	0	0.671121	0	0	0	0
CELSR1	0	0	0	0	0.670019	0	0	0	0
GSTP2	0	0	0	0	0.669905	0	0	0	0
ATP6V1F	0	0	0	0	0.668385	0	0	0	0
BOLA1	0	0	0	0	0.66835	0	0	0	0
GM45091	0	0	0	0	0.667052	0	0	0	0
PSPH	0	0	0	0	0.666727	0	0	0	0
LYPLA1	0	0	0	0	0.666535	0	0	0	0
NACA	0	0	0	0	0.666006	0	0	0	0
PLEKHB1	0	0	1	0	0.665918	0	0	0	0
ZFP872	0	0	0	0	0.665877	0	0	0	0
LNCPINT	0	0	0	0	0.665473	0	0	0	0
SDHAF1	0	0	0	0	0.664502	0	0	0	0
FAM89A	0	0	0	0	0.664064	0	0	0	0
H2AFJ	0	0	0	0	0.663964	0	0	0	0
A230050P20RIK	0	0	0	0	0.663948	0	0	0	0
RPL6	0	0	0	0	0.663744	0	0	0	0
ARL4A	0	0	0	0	0.66373	0	0	0	0
SRGAP3	0	0	0	0	0.663096	0	0	0	0
MRPL57	0	0	0	0	0.660615	0	0	0	0
GM12166	0	0	0	0	0.659185	0	0	0	0
UCK1	0	0	0	0	0.658981	0	0	0	0
SERF2	0	0	0	0	0.658589	0	0	0	0
EIF2S2	0	0	0	0	0.657902	0	0	0	0
GM32063	0	0	0	0	0.657341	0	0	0	0
RPL10A-PS1	0	0	0	0	0.656712	0	0	0	0
TMEM243	0	0	0	0	0.656661	0	0	0	0
EPB41L4AOS	0	0	0	0	0.656366	0	0	0	0
RPL13	0	0	0	0	0.656317	0	0	0	0
CD207	0	0	0	0	0.656151	0	0	0	0
RPS21	0	0	0	0	0.655897	0	0	0	0
RPS27L	0	0	0	0	0.654684	0	0	0	0
MUP-PS13	0	0	0	0	0.6546	0	0	0	0
ATP5H	0	0	0	0	0.653875	0	0	0	0
IQCG	0	0	0	0	0.653263	0	0	0	0
GM13340	0	0	0	0	0.652858	0	0	0	0
MRPS36	0	0	0	0	0.652788	0	0	0	0
FAM213B	0	0	0	0	0.652469	0	0	0	0
CCNG2	0	0	0	0	0.65229	0	0	0	0
RAB24	0	0	0	0	0.65221	0	0	0	0
GM5617	0	0	0	0	0.652158	0	0	0	0
SNRPG	0	0	0	0	0.651252	0	0	0	0
COX4I1	0	0	0	0	0.650923	0	0	0	0
GM10095	0	0	0	0	0.649881	0	0	0	0
COA6	0	0	0	0	0.649219	0	0	0	0
CHCHD2-PS	0	0	0	0	0.648884	0	0	0	0
HTATIP2	0	0	0	0	0.648573	1	0	0	0
POLE4	0	0	0	0	0.648519	0	0	0	0
1110028F11RIK	0	0	0	0	0.646466	0	0	0	0
ORMDL1	0	0	0	0	0.64316	0	0	0	0
TPT1-PS3	0	0	0	0	0.642834	0	0	0	0
0610031O16RIK	0	0	0	0	0.642596	0	0	0	0
MIEN1	0	0	0	0	0.642416	0	0	0	0
NDUFS6	0	0	0	0	0.642234	0	0	0	0
MRPL22	0	0	0	0	0.641879	0	0	0	0
PTPN18	0	0	0	0	0.64177	0	0	0	0
GM9892	0	0	0	0	0.641083	0	0	0	0
EIF4A2	0	0	0	0	0.641046	0	0	0	0
UQCR10	0	0	0	0	0.640536	0	0	0	0
CALN1	0	0	0	0	0.640435	0	0	0	0
MAP3K15	0	0	0	0	0.640354	0	0	0	0
MTHFR	0	0	0	0	0.640323	0	0	0	0
FBXL5	0	0	0	0	0.640047	0	0	0	0
GNPNAT1	0	0	0	0	0.639589	0	0	0	0
GM31522	0	0	0	0	0.63925	0	0	0	0
MRNIP	0	0	0	0	0.639161	0	0	0	0
SNORD118	0	0	0	0	0.638833	0	0	0	0
CKS2	0	0	0	0	0.638815	0	0	0	0
RACK1	0	0	0	0	0.638448	0	0	0	0
GM13657	0	0	0	0	0.637219	0	0	0	0
GM6652	0	0	0	0	0.636755	0	0	0	0
RPS25	0	0	0	0	0.636404	0	0	0	0
GM9385	0	0	0	0	0.635386	0	0	0	0
GNG11	0	0	0	0	0.635078	0	0	0	0
1810008I18RIK	0	0	0	0	0.634795	0	0	0	0
KCNK10	0	0	0	0	0.634567	0	0	0	0
NDUFB8	0	0	0	0	0.633972	0	0	0	0
2010320M18RIK	0	0	0	0	0.633921	0	0	0	0
CNIH1	0	0	0	0	0.633829	0	0	0	0
2510002D24RIK	0	0	0	0	0.63335	0	0	0	0
NUDCD2	0	0	0	0	0.631452	0	0	0	0
MGMT	0	0	0	0	0.631334	0	0	0	0
ADH4	0	0	1	0	0.631148	0	0	0	0
NDUFB7	0	0	0	0	0.631073	0	0	0	0
2810410L24RIK	0	0	0	0	0.628868	0	0	0	0
RPL14	0	0	0	0	0.628077	0	0	0	0
PRDX2	0	0	0	0	0.627729	0	0	0	0
EEF1B2	0	0	0	0	0.626997	0	0	0	0
MPC1-PS	0	0	0	0	0.626631	0	0	0	0
TMEM17	0	0	0	0	0.626453	0	0	0	0
KIF5A	0	0	0	0	0.626407	0	0	0	0
BCL7C	0	0	0	0	0.626375	0	0	0	0
RASL2-9	0	0	0	0	0.626227	0	0	0	0
GADD45B	0	0	0	0	0.625892	0	0	0	0
H2AFV	0	0	0	0	0.625445	0	0	0	0
A230072C01RIK	0	0	0	0	0.624969	0	0	0	0
ALKBH7	0	0	0	0	0.624821	0	0	0	0
ZFP958	0	0	0	0	0.623405	0	0	0	0
AKR1D1	0	0	0	0	0.623315	0	0	0	0
TMEM126A	0	0	0	0	0.622459	0	0	0	0
SAYSD1	0	0	0	0	0.620969	0	0	0	0
GM26461	0	0	0	0	0.620847	0	0	0	0
AGBL3	0	0	0	0	0.620345	0	0	0	0
G0S2	0	0	0	0	0.620337	0	0	0	0
FABP2	0	0	0	0	0.620307	0	0	0	0
SELENOK	0	0	0	0	0.62001	0	0	0	0
EIF3J1	0	0	0	0	0.619994	0	0	0	0
RPL37A	0	0	0	0	0.619981	0	0	0	0
SNRPD2	0	0	0	0	0.619891	0	0	0	0
SNRNP25	0	0	0	0	0.61978	0	0	0	0
GTF3A	0	0	0	0	0.619591	0	0	0	0
CHPT1	0	0	0	0	0.61785	0	0	0	0
GM2788	0	0	0	0	0.61684	0	0	0	0
GM16731	0	0	0	0	0.616787	0	0	0	0
EIF3H	0	0	0	0	0.616684	0	0	0	0
COX19	0	0	0	0	0.616504	0	0	0	0
RBM3	0	0	0	0	0.615905	0	0	0	0
RIC3	0	0	0	0	0.615673	0	0	0	0
PABPN1	0	0	0	0	0.615368	0	0	0	0
PSMA5	0	0	0	0	0.615336	0	0	0	0
OSBPL8	0	0	0	0	0.614712	0	0	0	0
COX14	0	0	0	0	0.6146	0	0	0	0
TYW5	0	0	0	0	0.612529	0	0	0	0
GCLC	0	0	0	0	0.612515	0	0	0	0
GM31333	0	0	0	0	0.611897	0	0	0	0
COQ2	0	0	0	0	0.611306	0	0	0	0
RPS11	0	0	0	0	0.610923	0	0	0	0
A430046D13RIK	0	0	0	0	0.610584	0	0	0	0
BC025446	0	0	0	0	0.610048	0	0	0	0
GCHFR	0	0	0	0	0.609904	0	0	0	0
HMGB1	0	0	0	0	0.609884	0	0	0	0
1110020A21RIK	0	0	0	0	0.609566	0	0	0	0
UQCC2	0	0	0	0	0.608823	0	0	0	0
NADK2	0	0	0	0	0.608823	0	0	0	0
RPL3	0	0	0	0	0.608074	0	0	0	0
CRYGN	0	0	0	0	0.607785	0	0	0	0
PSMA3	0	0	0	0	0.607134	0	0	0	0
DNAJC19	0	0	0	0	0.606723	0	0	0	0
GM11967	0	0	0	0	0.606483	0	0	0	0
GM25395	0	0	0	0	0.606418	0	0	0	0
GPN3	0	0	0	0	0.606088	0	0	0	0
SELENOP	0	0	0	0	0.605921	0	0	0	0
INSIG1	0	0	0	0	0.605438	0	0	0	0
AUH	0	0	0	0	0.604035	0	0	0	0
2010315B03RIK	0	0	0	0	0.603946	0	0	0	0
CYP2A22	0	0	0	0	0.601877	0	0	0	0
ZFP606	0	0	0	0	0.601839	0	0	0	0
NR1I3	0	0	0	0	0.601578	0	0	0	0
2810013P06RIK	0	0	0	0	0.60155	0	0	0	0
VBP1	0	0	0	0	0.600968	0	0	0	0
GM48633	0	0	0	0	0.600828	0	0	0	0
USF1	0	0	0	0	0.600573	0	0	0	0
LAG3	0	0	0	0	0.599877	0	0	0	0
MUP3	0	0	0	0	0.599532	0	0	0	0
GM34667	0	0	0	0	0.598911	0	0	0	0
GM13522	0	0	0	0	0.598645	0	0	0	0
PET100	0	0	0	0	0.598509	0	0	0	0
AATK	0	0	0	0	0.598088	0	0	0	0
TCTA	0	0	0	0	0.597727	0	0	0	0
PM20D2	0	0	0	0	0.59675	0	0	0	0
RMDN1	0	0	0	0	0.596623	0	0	0	0
GM11273	0	0	0	0	0.596533	0	0	0	0
ARNTL	0	0	0	0	0.595546	0	0	0	0
TRPM7	0	0	0	0	0.594955	0	0	0	0
FGD4	0	0	0	0	0.59478	0	0	0	0
RPS28	0	0	0	0	0.594743	0	0	0	0
TMED10-PS	0	0	0	0	0.594721	0	0	0	0
ILDR2	0	0	0	0	0.594165	0	0	0	0
CHRAC1	0	0	0	0	0.593937	0	0	0	0
NDUFAF5	0	0	0	0	0.593299	0	0	0	0
HNF1AOS1	0	0	0	0	0.593107	0	0	0	0
CELA1	0	0	0	0	0.592625	0	0	0	0
METTL23	0	0	0	0	0.592076	0	0	0	0
GM45338	0	0	0	0	0.59075	0	0	0	0
HMGCL	0	0	0	0	0.590055	0	0	0	0
HNRNPF	0	0	0	0	0.590039	0	0	0	0
CCDC148	0	0	0	0	0.589427	0	0	0	0
SOD1	0	0	0	0	0.588803	0	0	0	0
MESD	0	0	0	0	0.588528	0	0	0	0
TMEM242	0	0	0	0	0.588121	0	0	0	0
PURA	0	0	0	0	0.587832	0	0	0	0
DUSP12	0	0	0	0	0.587671	0	0	0	0
TRUB2	0	0	0	0	0.587591	0	0	0	0
RPL31	0	0	0	0	0.586632	0	0	0	0
PAFAH1B3	0	0	0	0	0.585328	0	0	0	0
MRPL33	0	0	0	0	0.585242	0	0	0	0
1110008F13RIK	0	0	0	0	0	1	0	0	0
1110008P14RIK	0	0	0	0	0	1	0	0	0
1700012B07RIK	0	0	0	0	0	1	0	0	0
1700016C15RIK	0	0	0	0	0	1	0	0	0
1700042G07RIK	0	0	0	0	0	0	1	0	0
1700102P08RIK	1	0	0	0	0	0	0	0	0
2210013O21RIK	0	0	0	0	0	0	0	1	0
2310011J03RIK	1	0	0	0	0	0	0	0	0
4930447A16RIK	0	0	0	0	0	1	0	0	0
4930503B20RIK	0	0	0	0	0	1	0	0	0
4930503L19RIK	0	0	0	0	0	1	0	0	0
4930513O06RIK	1	0	0	0	0	0	0	0	0
4930518I15RIK	0	0	0	0	0	1	0	0	0
4930539E08RIK	0	0	0	0	0	1	0	0	0
4933407L21RIK	0	0	0	0	0	1	0	0	0
5330417H12RIK	0	0	0	0	0	1	0	0	0
9930022D16RIK	0	0	0	0	0	1	0	0	0
AB124611	0	0	0	0	0	0	0	1	0
ABCC1	0	0	0	0	0	1	0	0	0
ABHD17A	0	0	0	0	0	1	0	0	0
AC034099	0	0	0	0	0	0	0	1	0
AC104834	1	0	0	0	0	0	0	0	0
ACOT4	1	0	0	0	0	0	0	0	0
ACPP	1	0	0	0	0	0	0	0	0
ACSL1	0	0	0	0	0	0	1	0	0
ACVRL1	0	0	0	0	0	0	0	1	0
ADAMTSL2	0	0	0	0	0	0	0	1	0
ADCY4	0	0	0	0	0	0	0	1	0
ADCYAP1	0	0	1	0	0	0	0	0	0
ADGRB3	0	0	1	0	0	0	0	0	0
ADGRE1	0	0	0	0	0	0	0	1	0
AFAP1L1	0	0	0	0	0	0	0	1	0
AFM	0	0	1	0	0	0	0	0	0
AGO1	0	0	0	0	0	1	0	0	0
AGRN	0	0	0	0	0	0	1	0	0
AHNAK	0	0	0	0	0	0	1	0	0
AIF1	0	0	0	0	0	0	0	1	0
AKR1C14	0	0	1	0	0	0	0	0	0
AL670603	0	0	0	0	0	0	1	0	0
ALAS2	0	0	1	0	0	0	0	0	0
ALDH1A7	1	0	1	0	0	0	0	0	0
ALOX12	0	0	0	0	0	0	1	0	0
AMHR2	1	0	0	0	0	0	0	0	0
ANKRD12	0	0	0	0	0	1	0	0	0
ANKRD37	1	0	0	0	0	0	0	0	0
APOBEC3	0	0	0	0	0	0	0	1	0
AR	1	0	0	0	0	0	0	0	0
ARHGAP15	0	0	0	0	0	0	0	1	0
ARHGAP25	0	0	0	0	0	0	0	1	0
ARHGDIB	0	0	0	0	0	0	0	1	0
ARHGEF1	0	0	0	0	0	0	1	0	0
ARL5C	0	0	0	0	0	0	0	1	0
ARMC12	0	0	0	0	0	1	0	0	0
ARMCX3	0	0	0	0	0	1	0	0	0
ASCL3	0	0	0	0	0	1	0	0	0
ASMT	1	0	0	0	0	0	0	0	0
ATF3	0	0	0	0	0	1	0	0	0
ATP10A	0	0	0	0	0	1	0	0	0
ATP10B	1	0	0	0	0	0	0	0	0
ATP6V0A4	0	0	0	0	0	1	0	0	0
AU021092	1	0	0	0	0	0	0	0	0
AU041133	0	0	0	0	0	0	0	1	0
AW011738	0	0	0	0	0	0	1	0	0
AXL	0	0	0	0	0	1	0	0	0
B430306N03RIK	0	0	0	0	0	0	0	1	0
B4GALT6	0	0	0	0	0	1	0	0	0
BASP1	0	0	0	0	0	1	0	0	0
BATF	0	0	0	0	0	0	0	1	0
BC016579	0	0	0	0	0	1	0	0	0
BC035044	0	0	0	0	0	0	0	1	0
BC035947	1	0	0	0	0	0	0	0	0
BCL2	0	1	0	0	0	0	0	0	0
BCL2A1A	0	0	0	0	0	0	0	1	0
BCL2A1B	0	0	0	0	0	0	0	1	0
BORCS5	0	0	0	0	0	1	0	0	0
BTG3	0	0	0	0	0	1	0	0	0
BUB1B	0	0	0	0	0	1	0	0	0
C130050O18RIK	0	0	0	0	0	0	0	2	0
C1QB	0	0	0	0	0	2	0	0	0
C1QC	0	0	0	0	0	1	0	1	0
C1QTNF7	0	0	0	0	0	0	0	1	0
C3AR1	0	0	0	0	0	1	0	0	0
C5AR2	0	0	0	0	0	0	0	1	0
CACNA1C	0	0	0	0	0	1	0	0	0
CALM5	1	0	0	0	0	0	0	0	0
CAND2	0	0	0	0	0	0	0	1	0
CAR3	1	0	1	0	0	0	0	0	0
CASP4	0	0	0	0	0	0	0	1	0
CASS4	0	0	0	0	0	0	0	1	0
CBX6	0	0	0	0	0	1	0	0	0
CC2D1B	0	0	0	0	0	1	0	0	0
CCDC80	0	0	0	0	0	0	0	1	0
CCL17	0	0	0	0	0	1	0	0	0
CCL5	0	0	0	0	0	1	0	0	0
CCL6	0	0	0	0	0	1	0	1	0
CCR1L1	0	0	0	0	0	1	0	0	0
CCR5	0	0	0	0	0	0	0	1	0
CD180	0	0	0	0	0	0	0	1	0
CD244	0	0	0	0	0	0	0	1	0
CD300A	0	0	0	0	0	0	0	1	0
CD300C	0	0	0	0	0	1	0	0	0
CD300C2	0	0	0	0	0	1	0	1	0
CD300LB	0	0	0	0	0	1	0	0	0
CD34	0	0	0	0	0	1	0	0	0
CD44	0	0	0	0	0	0	0	1	0
CD53	0	0	0	0	0	0	0	1	0
CD5L	0	0	0	0	0	0	0	1	0
CD72	0	0	0	0	0	0	0	1	0
CD74	0	0	0	0	0	1	0	0	0
CDC42EP2	0	0	0	0	0	0	1	0	0
CDH15	1	0	0	0	0	0	0	0	0
CDK14	0	0	0	0	0	1	0	0	0
CDKN1A	0	0	0	0	0	0	0	1	0
CERK	0	0	0	0	0	0	0	1	0
CES1E	1	0	1	0	0	0	0	0	0
CES1F	1	0	1	0	0	0	0	0	0
CES3B	0	0	1	0	0	0	0	0	0
CLCA2	0	0	0	0	0	0	0	1	0
CLCA3A1	0	0	0	0	0	0	0	1	0
CLEC1B	0	0	0	0	0	0	0	1	0
CLEC2I	0	0	0	0	0	0	0	1	0
CLEC4A3	0	0	0	0	0	1	0	1	0
CLEC4N	0	0	0	0	0	0	0	1	0
CMKLR1	0	0	0	0	0	1	0	0	0
CNDP2	0	0	0	0	0	0	0	1	0
COIL	1	0	0	0	0	0	0	0	0
COL12A1	1	0	0	0	0	0	0	0	0
CPNE8	0	0	0	0	0	1	0	0	0
CRIM1	0	0	0	0	0	1	0	0	0
CRIP3	1	0	0	0	0	0	0	0	0
CRLF1	1	0	0	0	0	0	0	0	0
CSF1R	0	0	0	0	0	1	0	1	0
CSF3R	0	0	0	0	0	1	0	0	0
CSNK1G1	0	0	0	0	0	1	0	0	0
CST3	0	0	0	0	0	0	0	1	0
CSTAD	0	0	0	0	0	0	0	1	0
CTNNA2	0	1	0	0	0	0	0	0	0
CTSC	0	0	0	0	0	0	0	1	0
CTSD	0	0	0	0	0	0	0	1	0
CTSS	0	0	0	0	0	0	0	1	0
CXCL10	0	0	0	0	0	1	0	0	0
CYP2A5	0	0	0	0	0	2	0	0	0
CYP2C50	0	0	1	0	0	0	0	0	0
CYP2C54	0	0	1	0	0	0	0	0	0
CYP2J6	0	0	0	0	0	1	0	0	0
CYP4F18	0	0	0	0	0	1	0	0	0
CYP7A1	0	0	1	0	0	0	0	0	0
CYP7B1	1	0	0	0	0	0	0	0	0
CYTH4	0	0	0	0	0	0	0	1	0
D630045J12RIK	0	0	1	0	0	0	0	0	0
DCLRE1C	1	0	0	0	0	0	0	0	0
DDRGK1	0	0	0	0	0	1	0	0	0
DEF6	0	0	0	0	0	0	0	1	0
DENND1C	0	0	0	0	0	0	0	1	0
DLGAP1	1	0	0	0	0	0	0	0	0
DNAJB13	0	0	0	0	0	0	0	1	0
DNAJB14	0	0	0	0	0	1	0	0	0
DNTTIP1	0	0	0	0	0	2	0	0	0
DOCK2	0	0	0	0	0	0	0	1	0
DOCK7	0	0	0	0	0	1	0	0	0
DOK6	0	0	0	0	0	0	0	1	0
DPT	0	0	0	0	0	1	0	0	0
DUSP5	0	0	0	0	0	1	0	0	0
DUXF3	0	0	0	0	0	1	0	0	0
DXO	1	0	0	0	0	0	0	0	0
E2F8	0	0	0	0	0	0	1	0	0
ECSCR	0	0	0	0	0	0	0	1	0
EDNRB	0	0	0	0	0	1	0	1	0
EFCAB12	0	0	0	0	0	1	0	0	0
EGFL7	0	0	0	0	0	0	0	1	0
EGFL8	0	0	0	0	0	1	0	0	0
EGLN2	0	0	0	0	0	1	0	0	0
EHD2	0	0	0	0	0	0	0	1	0
ELK1	0	0	0	0	0	1	0	0	0
ELOBL	1	0	0	0	0	0	0	0	0
ELOVL3	0	0	0	0	0	0	1	0	0
EMP1	0	0	0	0	0	0	0	1	0
ENTPD1	0	0	0	0	0	1	0	0	0
EOGT	0	0	0	0	0	1	0	0	0
EPDR1	0	0	0	0	0	0	0	1	0
EPSTI1	0	0	0	0	0	0	0	1	0
ESP38	0	0	0	0	0	0	1	0	0
ESRRG	1	0	0	0	0	0	0	0	0
ESYT1	0	0	0	0	0	1	0	0	0
ETS1	0	0	0	0	0	0	0	1	0
EVC2	0	0	0	0	0	1	0	1	0
EVI2	0	0	0	0	0	0	0	1	0
EVI2A	0	0	0	0	0	0	0	1	0
F2RL1	0	0	0	0	0	1	0	0	0
F930015N05RIK	0	0	0	0	0	1	0	0	0
FAM129A	0	0	0	0	0	0	0	1	0
FAM189B	0	0	0	0	0	1	0	0	0
FAM19A5	1	0	0	0	0	0	0	0	0
FAM46A	0	0	0	0	0	1	0	0	0
FCGR1	0	0	0	0	0	0	0	1	0
FCGR4	0	0	0	0	0	1	0	0	0
FGF12	0	1	0	0	0	0	0	0	0
FGF9	1	0	0	0	0	0	0	0	0
FGL1	0	1	0	0	0	0	0	0	0
FGL2	0	0	0	0	0	2	0	1	0
FILIP1L	0	0	2	0	0	0	0	0	0
FLRT2	0	0	0	0	0	0	0	1	0
FOLR2	0	0	0	0	0	1	0	0	0
FOSL2	0	1	0	0	0	0	0	0	0
FOXP2	0	0	0	0	0	1	0	0	0
FOXS1	0	0	0	0	0	0	0	1	0
FSTL1	0	0	0	0	0	1	0	0	0
FSTL3	0	0	0	0	0	1	0	0	0
FUT7	0	0	0	0	0	0	1	0	0
FXYD5	0	0	0	0	0	0	0	1	0
FYB	0	0	0	0	0	0	0	1	0
GADD45G	0	0	0	0	0	0	0	1	0
GALNT15	0	0	0	0	0	0	0	1	0
GALNT18	0	0	0	0	0	0	0	1	0
GDPD2	0	0	0	0	0	0	0	1	0
GGT5	0	0	0	0	0	0	0	1	0
GIPC2	0	0	0	0	0	1	0	0	0
GLDN	0	0	0	0	0	0	0	1	0
GLI3	0	1	0	0	0	0	0	0	0
GLIPR1	0	0	0	0	0	1	0	0	0
GM10197	0	0	1	0	0	0	0	0	0
GM10750	1	0	0	0	0	0	0	0	0
GM10964	0	0	0	0	0	0	0	1	0
GM12185	0	0	0	0	0	1	0	1	0
GM1330	1	0	0	0	0	0	0	0	0
GM15737	0	0	0	0	0	1	0	0	0
GM16181	0	0	0	0	0	0	0	1	0
GM1673	0	0	0	0	0	1	0	0	0
GM17455	0	0	0	0	0	1	0	0	0
GM20489	0	0	0	0	0	1	0	0	0
GM21970	0	0	0	0	0	1	0	0	0
GM29094	0	0	0	0	0	0	0	1	0
GM35549	1	0	0	0	0	0	0	0	0
GM42674	0	0	0	0	0	1	0	0	0
GM4841	0	0	0	0	0	1	0	0	0
GM5093	0	0	1	0	0	0	0	0	0
GM5150	0	0	0	0	0	0	0	1	0
GM5294	0	0	1	0	0	0	0	0	0
GM5431	0	0	0	0	0	0	0	1	0
GM5468	0	0	0	0	0	1	0	0	0
GM5916	0	0	0	0	0	0	0	1	0
GM614	0	0	0	0	0	1	0	0	0
GM6525	0	1	0	0	0	0	0	0	0
GM6583	0	0	0	0	0	1	0	0	0
GM973	1	0	0	0	0	0	0	0	0
GM9925	1	0	0	0	0	0	0	0	0
GMFG	0	0	0	0	0	0	0	1	0
GNG2	0	0	0	0	0	0	0	1	0
GPC1	1	0	0	0	0	0	0	0	0
GPC6	0	0	0	0	0	1	0	0	0
GPR171	0	0	0	0	0	1	0	0	0
GPR55	0	0	0	0	0	1	0	0	0
GPX3	0	0	0	0	0	1	0	0	0
GRIK2	0	0	1	0	0	0	0	0	0
GRIN2C	1	0	0	0	0	0	0	0	0
GRM8	1	0	0	0	0	0	0	0	0
GSTM7	0	0	1	0	0	0	0	0	0
H2-EB1	0	0	0	0	0	1	0	1	0
H2-M3	0	0	0	0	0	0	1	0	0
HCST	0	0	0	0	0	1	0	0	0
HDAC2	0	0	0	0	0	1	0	0	0
HEATR4	1	0	0	0	0	0	0	0	0
HHIPL2	0	0	0	0	0	1	0	0	0
HIST1H1B	0	0	0	0	0	1	0	1	0
HIST1H2AK	0	0	0	0	0	2	0	2	0
HIST1H2AN	0	0	0	0	0	0	0	1	0
HIST1H2BM	0	0	0	0	0	1	0	0	0
HIST1H2BN	0	0	0	0	0	2	0	2	0
HIST1H2BP	0	0	0	0	0	0	0	1	0
HIST1H3I	0	0	0	0	0	1	0	1	0
HIST1H4K	0	0	0	0	0	2	0	2	0
HIST3H2A	0	0	0	0	0	1	0	0	0
HK2	0	0	0	0	0	1	0	0	0
HRCT1	0	0	0	0	0	0	0	1	0
HS3ST3A1	0	0	0	0	0	1	0	0	0
HSD3B2	1	0	0	0	0	0	0	0	0
HSD3B5	0	0	1	0	0	0	0	0	0
HSD3B7	0	0	0	0	0	0	1	0	0
ICAM1	0	0	0	0	0	0	0	1	0
IFI204	0	0	0	0	0	1	0	1	0
IFI205	0	0	0	0	0	0	0	1	0
IFI209	0	0	0	0	0	1	0	1	0
IFI211	0	0	0	0	0	1	0	1	0
IFI213	0	0	0	0	0	1	0	1	0
IFI27	0	0	0	0	0	0	1	0	0
IFI27L2A	0	0	0	0	0	0	1	1	0
IFIT1BL1	0	0	0	0	0	1	0	0	0
IFIT1BL2	0	0	0	0	0	0	0	1	0
IFITM1	0	0	0	0	0	1	0	0	0
IGFBP7	0	1	0	0	0	0	0	0	0
IGSF6	0	0	0	0	0	0	0	1	0
IIGP1	0	0	0	0	0	0	0	1	0
IL12A	0	0	0	0	0	0	0	1	0
IL1RL2	0	0	0	0	0	1	0	0	0
IL2RG	0	0	0	0	0	1	0	0	0
ILF3	0	0	0	0	0	1	0	0	0
INPP5D	0	0	0	0	0	0	0	1	0
INTS3	0	0	0	0	0	1	0	0	0
INTU	0	0	0	0	0	1	0	0	0
ISG15	0	0	0	0	0	0	1	0	0
ITGA4	0	0	0	0	0	1	0	0	0
ITGA6	0	0	0	0	0	1	0	0	0
ITGAL	0	0	0	0	0	0	0	1	0
ITGB2	0	0	0	0	0	0	0	1	0
ITPRIPL2	0	0	0	0	0	1	0	0	0
KCTD12B	0	0	0	0	0	1	0	0	0
KEG1	0	0	1	0	0	0	0	0	0
KIF11	0	0	0	0	0	1	0	0	0
KIF23	0	0	0	0	0	0	0	1	0
KLHL32	1	0	0	0	0	0	0	0	0
LAIR1	0	0	0	0	0	1	0	0	0
LAPTM5	0	0	0	0	0	0	0	1	0
LCP2	0	0	0	0	0	1	0	1	0
LHX1	1	0	0	0	0	0	0	0	0
LILR4B	0	0	0	0	0	0	0	1	0
LILRA5	0	0	0	0	0	1	0	0	0
LILRB4A	0	0	0	0	0	0	0	1	0
LINGO2	1	0	0	0	0	0	0	0	0
LNX1	0	0	0	0	0	1	0	0	0
LPAR2	0	0	0	0	0	1	0	0	0
LRRC25	0	0	0	0	0	0	0	1	0
LRRFIP1	0	0	0	0	0	1	0	0	0
LSP1	0	0	0	0	0	1	0	0	0
LTB4R1	0	0	0	0	0	0	0	1	0
LTB4R2	0	0	0	0	0	0	0	1	0
LUM	0	0	0	0	0	0	0	1	0
LXN	0	0	0	0	0	0	0	1	0
LY6A	0	0	0	0	0	0	0	1	0
LYSMD2	0	0	0	0	0	1	0	0	0
MAPK4	1	0	0	0	0	0	0	0	0
MATK	0	0	0	0	0	1	0	0	0
MEIG1	1	0	0	0	0	0	0	0	0
MICALL2	0	0	0	0	0	0	0	1	0
MIF4GD	1	1	0	0	0	0	0	0	0
MILR1	0	0	0	0	0	1	0	0	0
MNDAL	0	0	0	0	0	0	0	1	0
MOGAT1	1	0	0	0	0	0	0	0	0
MS4A6B	0	0	0	0	0	0	0	1	0
MS4A6C	0	0	0	0	0	0	0	1	0
MSH6	0	0	0	0	0	1	0	0	0
MUP15	0	0	1	0	0	0	0	0	0
MUP7	0	0	1	0	0	0	0	0	0
MYBPC3	1	0	0	0	0	0	0	0	0
MYO18B	0	0	0	0	0	1	0	0	0
MYO1F	0	0	0	0	0	1	0	0	0
MYO1G	0	0	0	0	0	0	0	1	0
NAT8	0	0	1	0	0	0	0	0	0
NCAM2	1	0	0	0	0	0	0	0	0
NCF4	0	0	0	0	0	0	0	1	0
NCKAP1L	0	0	0	0	0	0	0	1	0
NCKIPSD	1	0	0	0	0	0	0	0	0
NDUFA12	0	0	0	0	0	1	0	0	0
NEK5	0	0	0	0	0	1	0	0	0
NFAM1	0	0	0	0	0	0	0	1	0
NFKBIB	0	0	0	0	0	1	0	0	0
NFKBID	0	0	0	0	0	1	0	0	0
NKX1-2	1	0	0	0	0	0	0	0	0
NLRP12	0	0	0	0	0	0	0	1	0
NLRP1B	0	0	0	0	0	1	0	0	0
NLRP3	0	0	0	0	0	0	0	1	0
NNMT	0	0	0	0	0	0	0	1	0
NPCD	0	0	0	0	0	1	0	0	0
NPNT	1	0	0	0	0	0	0	0	0
NPTX1	1	0	0	0	0	0	0	0	0
NR5A1	0	0	0	0	0	1	0	0	0
NTPCR	0	0	0	0	0	0	0	1	0
NUMBL	0	0	0	0	0	1	0	0	0
NUP93	0	0	0	0	0	1	0	0	0
NXPE3	0	0	0	0	0	1	0	0	0
NXPH3	1	0	0	0	0	0	0	0	0
NYNRIN	0	0	0	0	0	0	0	1	0
OAS1A	0	0	0	0	0	1	0	1	0
OAS1C	0	0	0	0	0	1	0	0	0
OAS1G	0	0	0	0	0	1	0	1	0
OGT	0	0	0	0	0	1	0	0	0
OLFML3	0	0	0	0	0	0	0	1	0
OLFR1036	1	0	0	0	0	0	0	0	0
OLFR1160	1	0	0	0	0	0	0	0	0
OLFR15	0	0	0	0	0	1	0	0	0
OLFR275	1	1	0	0	0	0	0	0	0
OLFR518	1	0	0	0	0	0	0	0	0
OLFR9	1	0	0	0	0	0	0	0	0
OSMR	0	0	0	0	0	0	0	1	0
P2RY12	0	0	0	0	0	0	0	1	0
P4HB	0	0	0	0	0	0	1	0	0
PAPPA	0	0	0	0	0	1	0	0	0
PARVG	0	0	0	0	0	1	0	0	0
PCLO	1	0	0	0	0	0	0	0	0
PCM1	0	0	0	0	0	1	0	0	0
PDGFB	0	0	0	0	0	0	0	1	0
PECAM1	0	0	0	0	0	1	0	0	0
PEPD	0	0	0	0	0	1	0	0	0
PFKFB2	0	0	0	0	0	1	0	0	0
PHF11D	0	0	0	0	0	0	0	1	0
PIGC	0	0	0	0	0	1	0	0	0
PIK3CD	0	0	0	0	0	0	0	1	0
PIK3R5	0	0	0	0	0	1	0	0	0
PILRA	0	0	0	0	0	0	0	1	0
PILRB1	0	0	0	0	0	1	0	1	0
PILRB2	0	0	0	0	0	0	0	1	0
PLA2G7	0	0	0	0	0	0	0	1	0
PLAGL2	0	0	0	0	0	1	0	0	0
PLAUR	0	0	0	0	0	0	0	1	0
PLD4	0	0	0	0	0	0	0	1	0
PLEKHS1	0	0	0	0	0	1	0	0	0
PLVAP	0	0	0	0	0	0	1	0	0
POFUT1	0	0	0	0	0	1	0	0	0
POPDC2	0	0	0	0	0	1	0	0	0
PPHLN1	0	0	0	0	0	1	0	0	0
PPP1R1B	0	0	0	0	0	0	0	1	0
PPP1R27	0	0	0	0	0	1	0	0	0
PRAP1	0	0	0	0	0	1	0	0	0
PRKAB2	1	0	0	0	0	0	0	0	0
PRKACB	0	0	0	0	0	1	0	0	0
PSD3	0	0	0	0	0	0	0	1	0
PSKH1	0	0	0	0	0	1	0	0	0
PTGIR	0	0	0	0	0	0	0	1	0
PTGS1	0	0	0	0	0	0	0	1	0
PTK7	0	0	0	0	0	1	0	1	0
PTPN22	0	0	0	0	0	0	0	1	0
PTPRC	0	0	0	0	0	0	0	1	0
RAB31	0	0	0	0	0	1	0	0	0
RAB7B	0	0	0	0	0	1	0	1	0
RAD21L	0	0	0	0	0	1	0	0	0
RAD9B	0	0	0	0	0	1	0	0	0
RAMP1	0	0	0	0	0	0	0	1	0
RARRES1	1	0	0	0	0	0	0	0	0
RASAL3	0	0	0	0	0	1	0	0	0
RBM38	0	0	0	0	0	0	1	0	0
RCAN3	0	0	0	0	0	0	1	0	0
RETREG1	0	0	0	0	0	1	0	0	0
RFX4	1	0	0	0	0	0	0	0	0
RGS1	0	0	0	0	0	1	0	1	0
RGS2	0	0	0	0	0	1	0	1	0
RHOH	0	0	0	0	0	0	0	1	0
RND1	0	0	0	0	0	0	1	0	0
RNF11	0	0	0	0	0	1	0	0	0
RNF138	0	0	0	0	0	1	0	0	0
RNF207	0	0	0	0	0	0	0	1	0
RPL7L1	1	0	0	0	0	0	0	0	0
RUNX1	0	0	0	0	0	1	0	1	0
S100A4	0	0	0	0	0	1	0	0	0
S1PR5	0	0	1	0	0	0	0	0	0
SARAF	0	0	0	0	0	1	0	0	0
SCD2	0	0	0	0	0	0	0	1	0
SCGB3A1	0	0	0	0	0	1	0	0	0
SCX	0	0	0	0	0	1	0	0	0
SEC16B	0	0	1	0	0	0	0	0	0
SERINC2	1	0	0	0	0	0	0	0	0
SERPINA3F	0	0	0	0	0	0	0	1	0
SERPINA3G	0	0	0	0	0	0	0	1	0
SFRP4	0	0	0	0	0	0	0	1	0
SH2D6	0	0	0	0	0	1	0	0	0
SH3BGRL3	0	0	0	0	0	0	0	1	0
SH3PXD2B	0	0	0	0	0	1	0	0	0
SH3RF3	0	0	0	0	0	0	0	1	0
SH3TC2	0	0	0	0	0	0	0	1	0
SHC2	0	0	0	0	0	0	0	1	0
SIGLEC1	0	0	0	0	0	0	0	1	0
SIRPB1B	0	0	0	0	0	1	0	0	0
SIRPB1C	0	0	0	0	0	1	0	0	0
SLC10A6	0	0	0	0	0	1	0	1	0
SLC15A3	0	0	0	0	0	0	0	1	0
SLC15A5	0	0	1	0	0	0	0	0	0
SLC16A5	0	0	0	0	0	0	0	1	0
SLC22A12	0	0	0	0	0	1	0	0	0
SLC22A28	1	0	1	0	0	0	0	0	0
SLC22A7	0	0	1	0	0	0	0	0	0
SLC25A24	0	0	0	0	0	0	0	1	0
SLC2A10	0	0	0	0	0	1	0	0	0
SLC2A3	0	0	0	0	0	1	0	0	0
SLC2A5	0	0	1	0	0	0	0	0	0
SLC36A3	0	0	0	0	0	1	0	0	0
SLC43A2	0	0	0	0	0	0	1	0	0
SLC44A3	1	0	0	0	0	0	0	0	0
SLC7A13	1	0	0	0	0	0	0	0	0
SLCO1A1	0	0	1	0	0	0	0	0	0
SLFN1	0	0	0	0	0	1	0	0	0
SLFN2	0	0	0	0	0	1	0	1	0
SLFN5	0	0	0	0	0	0	0	1	0
SLFN8	0	0	0	0	0	0	1	1	0
SMOC2	0	0	0	0	0	0	0	1	0
SMPDL3B	0	0	0	0	0	1	0	0	0
SNX20	0	0	0	0	0	0	0	1	0
SOCS1	0	0	0	0	0	1	0	0	0
SORCS3	0	1	0	0	0	0	0	0	0
SORL1	0	0	0	0	0	1	0	0	0
SOX17	0	0	0	0	0	0	0	1	0
SOX5	0	0	0	0	0	1	0	0	0
SPAAR	0	0	0	0	0	0	0	1	0
SPARCL1	0	0	0	0	0	0	0	1	0
SPHK1	0	0	0	0	0	1	0	0	0
SPIN1	0	0	0	0	0	1	0	0	0
SPON1	0	0	0	0	0	0	0	1	0
SPSB4	0	0	0	0	0	0	0	1	0
SRCIN1	1	0	0	0	0	0	0	0	0
SSTR3	0	0	0	0	0	1	0	0	0
ST3GAL5	0	0	0	0	0	0	1	0	0
STARD6	0	0	0	0	0	1	0	0	0
STK19	1	0	0	0	0	0	0	0	0
STRIP2	0	0	0	0	0	1	0	0	0
SUCNR1	0	1	1	0	0	0	0	0	0
SULF2	0	0	0	0	0	1	0	0	0
SULT2A8	0	0	1	0	0	0	0	0	0
SYPL2	1	0	0	0	0	0	0	0	0
SYT17	0	1	0	0	0	1	0	0	0
TAAR1	1	0	0	0	0	0	0	0	0
TAGAP	0	0	0	0	0	0	0	1	0
TAS2R126	0	0	0	0	0	1	0	0	0
TAS2R143	0	0	0	0	0	1	0	0	0
THBD	0	0	0	0	0	0	0	1	0
THBS1	0	0	0	0	0	1	0	0	0
TIFAB	0	0	0	0	0	1	0	1	0
TLR4	0	0	0	0	0	0	0	1	0
TLR6	0	0	0	0	0	0	0	1	0
TM4SF19	0	0	0	0	0	1	0	0	0
TMC1	1	0	0	0	0	0	0	0	0
TMEM132E	0	0	0	0	0	0	0	1	0
TMEM173	0	0	0	0	0	0	0	1	0
TMEM28	1	0	0	0	0	0	0	0	0
TMEM39B	0	0	0	0	0	1	0	0	0
TMEM50A	0	0	0	0	0	0	0	1	0
TMEM59L	1	0	0	0	0	0	0	0	0
TMEM72	0	0	0	0	0	1	0	0	0
TMPPE	0	0	0	0	0	1	0	0	0
TNFRSF18	0	0	0	0	0	1	0	0	0
TNFRSF26	0	0	0	0	0	0	0	1	0
TNFSF14	0	0	0	0	0	1	0	1	0
TNFSF18	0	0	0	0	0	1	0	0	0
TNIP1	0	0	0	0	0	0	0	1	0
TONSL	1	0	0	0	0	0	0	0	0
TOR2A	0	0	0	0	0	1	0	0	0
TOX2	0	0	0	0	0	0	0	1	0
TPCN2	0	0	0	0	0	1	0	0	0
TRIM17	0	0	0	0	0	1	0	0	0
TRIM59	0	0	0	0	0	1	0	0	0
TRIM72	0	0	0	0	0	1	0	0	0
TRIP4	0	0	0	0	0	1	0	0	0
TRMT10B	1	0	0	0	0	0	0	0	0
TRPV2	1	0	0	0	0	0	0	1	0
TRPV4	0	0	0	0	0	2	0	0	0
TSPAN32	0	0	0	0	0	0	1	0	0
TSPYL3	0	0	0	0	0	1	0	0	0
TTC36	0	0	1	0	0	0	0	0	0
TTN	1	0	0	0	0	0	0	0	0
TUBGCP5	0	0	0	0	0	1	0	0	0
TVP23A	0	0	0	0	0	1	0	0	0
TVP23B	0	0	0	0	0	1	0	0	0
TXK	0	0	0	0	0	1	0	0	0
TXLNB	0	0	0	0	0	1	0	0	0
TYROBP	0	0	0	0	0	2	0	0	0
UBAC1	0	0	0	0	0	1	0	0	0
UGT1A9	0	0	0	0	0	0	0	1	0
UGT3A1	0	0	1	0	0	0	0	0	0
ULBP1	0	0	0	0	0	0	0	1	0
UNC13A	0	0	0	0	0	1	0	0	0
UNC13D	0	0	0	0	0	0	0	1	0
USP7	0	0	0	0	0	1	0	0	0
VAMP5	0	0	0	0	0	0	1	0	0
VPS29	0	0	0	0	0	1	0	0	0
VWA3A	0	0	0	0	0	1	0	0	0
WASF2	0	0	0	0	0	0	0	1	0
WDR70	1	0	0	0	0	0	0	0	0
WFDC12	0	0	0	0	0	1	0	0	0
WFDC18	0	0	0	0	0	0	0	1	0
WFDC3	0	0	0	0	0	2	0	0	0
WNT1	0	0	0	0	0	0	0	1	0
WNT8A	0	0	1	0	0	0	0	0	0
XKR5	0	0	0	0	0	0	0	1	0
ZC3H12A	0	0	0	0	0	1	0	0	0
ZCRB1	0	0	0	0	0	1	0	0	0
ZDHHC1	0	0	0	0	0	0	0	1	0
ZDHHC15	0	0	0	0	0	0	0	1	0
ZFP316	0	0	0	0	0	1	0	0	0
ZFP691	0	0	0	0	0	1	0	0	0
ZFP984	0	0	0	0	0	1	0	0	0
ZMYND8	0	0	1	0	0	0	0	0	0
TNS2	0	0	0	0	-0.585239	0	0	0	0
NR4A1	0	0	0	0	-0.585878	0	0	1	0
LRRC47	0	0	0	0	-0.58678	0	0	0	0
DRC1	0	0	0	0	-0.586976	0	0	0	0
TCTN3	0	0	0	0	-0.586993	1	0	0	0
IMPDH1	0	0	0	0	-0.587087	0	0	0	0
PRDM11	0	0	0	0	-0.587166	0	0	0	0
GM33543	0	0	0	0	-0.587859	0	0	0	0
CTDSP1	0	0	0	0	-0.587915	0	0	0	0
INCENP	0	0	0	0	-0.588	0	0	0	0
WNK1	0	0	0	0	-0.588596	0	0	0	0
ABCG5	0	0	0	0	-0.588907	0	0	0	0
CSF2RB	0	0	0	0	-0.589361	0	0	1	0
PPT2	0	0	0	0	-0.589411	0	0	0	0
TUFT1	0	0	0	0	-0.589475	0	0	0	0
C2	0	0	0	0	-0.589682	0	0	0	0
ANKRD52	0	0	0	0	-0.58977	0	0	0	0
UGT2B1	0	0	0	0	-0.590828	0	0	0	0
LMF2	0	0	0	0	-0.591019	0	0	0	0
E2F4	0	0	0	0	-0.591218	0	0	0	0
HS3ST3B1	0	0	0	0	-0.591854	0	0	0	0
C1QTNF1	0	0	0	0	-0.591936	0	0	1	0
AI606181	0	0	0	0	-0.59202	0	0	0	0
SLC29A3	0	0	0	0	-0.59214	0	0	0	0
DDR1	0	0	0	0	-0.592301	0	0	0	0
MLXIP	0	0	0	0	-0.593061	0	0	1	0
PPL	0	0	0	0	-0.593361	0	0	0	0
CNTFR	0	0	0	0	-0.593414	0	0	0	0
ATP1B1	0	0	0	0	-0.59362	0	0	0	0
ALB	0	0	0	0	-0.59396	0	0	0	0
WFS1	0	0	0	0	-0.594229	0	0	0	0
GYS2	0	0	0	0	-0.594373	0	0	0	0
TOM1L2	0	0	0	0	-0.594842	0	0	0	0
APH1C	0	0	0	0	-0.594962	0	0	0	0
AGPAT1	0	0	0	0	-0.595306	0	0	0	0
SLC25A51	0	0	0	0	-0.596003	0	0	0	0
CIDEB	0	0	0	0	-0.596336	0	0	0	0
ZFP385A	0	0	0	0	-0.596415	0	0	0	0
ARHGAP11A	0	0	0	0	-0.59657	0	0	0	0
HSPH1	0	0	0	0	-0.597503	0	0	0	0
PLXNB1	0	0	0	0	-0.597841	0	0	0	0
TLR3	0	0	0	0	-0.597905	0	0	0	0
RGS4	0	0	0	0	-0.598835	0	0	0	0
BACH2	0	0	0	0	-0.598867	0	0	0	0
CRP	0	0	0	0	-0.598878	0	0	0	0
CXXC1	0	0	0	0	-0.599127	0	0	0	0
PDIA5	0	0	0	0	-0.599217	0	0	0	0
DISP2	0	0	0	0	-0.599397	0	0	0	0
XYLB	0	0	0	0	-0.599409	0	0	0	0
CLEC2H	0	0	0	0	-0.599465	0	0	0	0
NFATC1	0	0	0	0	-0.600599	0	0	0	0
PRG4	0	0	0	0	-0.600735	0	0	0	0
MYL9	0	0	0	0	-0.60127	0	0	0	0
PLPPR2	0	0	0	0	-0.601732	0	0	0	0
IFITM3	0	0	0	0	-0.602876	0	0	0	0
ADGRG1	0	0	0	0	-0.602927	1	0	1	0
DIABLO	0	0	0	0	-0.603365	0	0	0	0
LYNX1	0	0	0	0	-0.604316	0	0	0	0
TICAM1	0	0	0	0	-0.60433	0	0	0	0
PLEKHM3	0	0	0	0	-0.604404	0	0	0	0
IRGM1	0	0	0	0	-0.604591	0	0	0	0
ANGEL1	0	0	0	0	-0.604673	0	0	0	0
NAP1L3	0	0	0	0	-0.605364	0	0	0	0
MNT	0	0	0	0	-0.60648	0	0	0	0
PCSK4	0	0	0	0	-0.606845	0	0	0	0
ADGRG3	0	0	0	0	-0.60741	0	0	0	0
GM16551	0	0	0	0	-0.608463	0	0	0	0
COL4A1	0	0	0	0	-0.609135	0	0	1	0
COL4A5	0	0	0	0	-0.609546	0	0	0	0
DACT1	0	0	0	0	-0.610027	0	0	0	0
THPO	0	0	0	0	-0.610112	0	0	0	0
LRRC8C	0	0	0	0	-0.612441	0	0	0	0
MAP4	0	0	0	0	-0.612506	0	0	0	0
PAPSS2	0	0	0	0	-0.612585	0	0	0	0
SHANK3	0	0	0	0	-0.612657	0	0	0	0
IFI203	0	0	0	0	-0.613156	0	0	1	0
SLC35A4	0	0	0	0	-0.613333	0	0	0	0
ZBP1	0	0	0	0	-0.613564	0	0	0	0
TPBGL	0	0	0	0	-0.614469	0	0	0	0
HBA-A1	0	0	0	0	-0.614634	0	0	0	0
SLC25A42	0	0	0	0	-0.61486	0	0	0	0
NPHP1	0	0	0	0	-0.615247	0	0	0	0
CEBPD	0	0	0	0	-0.61535	0	0	0	0
TMC7	0	0	0	0	-0.615761	0	0	0	0
FBLIM1	0	0	0	0	-0.615801	0	0	1	0
ELF4	0	0	0	0	-0.615886	0	0	0	0
RPS6KA3	0	0	0	0	-0.616001	0	0	0	0
MS4A6D	0	0	0	0	-0.616354	0	0	1	0
SYT1	0	0	0	0	-0.616444	0	0	0	0
MOB3B	0	0	0	0	-0.617359	0	0	0	0
PPARGC1B	0	0	0	0	-0.618084	0	0	0	0
TAGLN2	0	0	0	0	-0.618154	0	0	0	0
TRIB1	0	0	0	0	-0.618218	0	0	0	0
PCGF2	0	0	0	0	-0.618272	0	0	0	0
EPB41	0	0	0	0	-0.618297	0	0	0	0
AKR1B10	0	0	0	0	-0.618742	0	0	0	0
RELA	0	0	0	0	-0.618839	0	0	0	0
TES	0	0	0	0	-0.619567	0	0	0	0
TPCN1	0	0	0	0	-0.619817	0	0	0	0
C130013H08RIK	0	0	0	0	-0.620033	0	0	0	0
CLEC4A2	0	0	0	0	-0.620237	0	0	0	0
FNDC3B	0	0	0	0	-0.620681	0	0	0	0
MBD1	0	0	0	0	-0.621814	0	0	0	0
ITGA10	0	0	0	0	-0.622007	0	0	0	0
PRDM2	0	0	0	0	-0.622168	0	0	0	0
PPARGC1A	0	0	0	0	-0.622409	0	0	0	0
FNTB	0	0	0	0	-0.622473	0	0	0	0
MT-ND2	0	0	0	0	-0.622559	0	0	0	0
FAM122B	0	0	0	0	-0.623126	0	0	0	0
NLGN2	0	0	0	0	-0.623288	0	0	0	0
ADAM19	0	0	0	0	-0.623301	0	0	0	0
DAB2	0	0	0	0	-0.623728	0	0	0	0
LRRC8A	0	0	0	0	-0.624009	0	0	0	0
PCK1	0	0	0	0	-0.624229	0	0	0	0
CTIF	0	0	0	0	-0.62472	0	0	0	0
DES	0	0	0	0	-0.624981	0	0	0	0
FADS2	0	0	0	0	-0.62614	0	0	0	0
GAR1	0	0	0	0	-0.626433	0	0	0	0
GAPDH	0	0	0	0	-0.626808	0	0	0	0
ETV6	0	0	0	0	-0.62788	0	0	0	0
PIM2	0	0	0	0	-0.62789	0	0	0	0
SCAF4	0	0	0	0	-0.628717	0	0	0	0
TIMELESS	0	0	0	0	-0.629039	0	0	0	0
WIPF2	0	0	0	0	-0.629421	0	0	0	0
FMOD	0	0	0	0	-0.630652	0	0	0	0
SLC41A2	0	0	0	0	-0.630654	0	0	0	0
CTGF	0	0	0	0	-0.631297	0	0	0	0
TGFB1	0	0	0	0	-0.632062	0	0	0	0
MTHFD1L	0	0	0	0	-0.632257	0	0	0	0
SETD1A	0	0	0	0	-0.632334	0	0	0	0
GIGYF1	0	0	0	0	-0.63244	0	0	0	0
TCF7	0	0	0	0	-0.632607	0	0	0	0
SLC9A1	0	0	0	0	-0.632944	0	0	0	0
VANGL1	0	0	0	0	-0.633413	0	0	0	0
AP3M1	0	0	0	0	-0.633423	0	0	0	0
FAM102A	0	0	0	0	-0.636043	0	0	0	0
PDE4A	0	0	0	0	-0.637729	0	0	0	0
EID1	0	0	0	0	-0.637898	0	0	0	0
IDO2	0	0	0	0	-0.638253	0	0	0	0
FGB	0	0	0	0	-0.638693	0	0	0	0
PTPN23	0	0	0	0	-0.639133	0	0	0	0
FUS	0	0	0	0	-0.639812	0	0	0	0
FMNL1	0	0	0	0	-0.640501	0	0	0	0
SERPINA6	0	0	0	0	-0.640637	0	0	0	0
ARID1A	0	0	0	0	-0.640717	0	0	0	0
MYO18A	0	0	0	0	-0.641154	0	0	0	0
HIP1R	0	0	0	0	-0.641557	0	0	0	0
IL1R1	0	0	0	0	-0.642947	0	0	0	0
ALG3	0	0	0	0	-0.643216	0	0	0	0
PHF11B	0	0	0	0	-0.64332	0	0	0	0
ZMAT3	0	0	0	0	-0.643777	0	0	0	0
SLC7A8	0	0	0	0	-0.644227	0	0	0	0
SFXN3	0	0	0	0	-0.644333	0	0	0	0
SAMD4B	0	0	0	0	-0.644672	0	0	0	0
ZFP628	0	0	0	0	-0.644672	0	0	0	0
DERL3	0	0	0	0	-0.645257	0	0	0	0
KIF26B	0	0	0	0	-0.646414	0	0	0	0
TCF7L2	0	0	0	0	-0.646912	0	0	0	0
LDB1	0	0	0	0	-0.647252	0	0	0	0
SULT5A1	0	0	0	0	-0.64729	0	0	0	0
ACSF2	0	0	0	0	-0.647367	0	0	0	0
ATXN7L1	0	0	0	0	-0.647385	0	0	0	0
SOCS3	0	0	0	0	-0.64804	0	0	0	0
PVR	0	0	0	0	-0.648975	0	0	0	0
MYL12B	0	0	0	0	-0.649762	0	0	0	0
NAA80	0	0	0	0	-0.649992	0	0	0	0
ELOVL1	0	0	0	0	-0.651049	0	0	0	0
PRR3	0	0	0	0	-0.651265	0	0	0	0
TNFRSF1A	0	0	0	0	-0.651905	0	0	0	0
IL6RA	0	0	0	0	-0.652492	0	0	0	0
ZBTB7C	0	0	0	0	-0.652719	0	0	0	0
LY6D	0	0	0	0	-0.653261	0	0	0	0
OCRL	0	0	0	0	-0.65397	0	0	0	0
RPH3AL	0	0	0	0	-0.654182	0	0	0	0
GM11914	0	0	0	0	-0.655885	0	0	0	0
P2RY6	0	0	0	0	-0.656553	0	0	0	0
TMEM104	0	0	0	0	-0.657514	0	0	0	0
CHST12	0	0	0	0	-0.657741	0	0	0	0
SLC35D1	0	0	0	0	-0.65912	0	0	0	0
NUSAP1	0	0	0	0	-0.659446	0	0	0	0
SIK1	0	0	0	0	-0.660138	0	0	0	0
SDC3	0	0	0	0	-0.660946	0	0	0	0
KCTD15	0	0	0	0	-0.66271	0	0	0	0
SF1	0	0	0	0	-0.663021	0	0	0	0
UNC45B	0	0	0	0	-0.663483	0	0	0	0
RPS10-PS1	0	0	0	0	-0.664355	0	0	0	0
CRTC1	0	0	0	0	-0.66445	0	0	0	0
EVC	0	0	0	0	-0.664516	1	0	1	0
BCO1	0	0	0	0	-0.664577	0	0	0	0
ARSB	0	0	0	0	-0.667184	0	0	0	0
HSD3B3	1	0	0	0	-0.667763	0	0	0	0
SAMD10	0	0	0	0	-0.667872	0	0	0	0
PITPNM2	0	0	0	0	-0.668467	0	0	0	0
MFSD2A	0	0	0	0	-0.668622	0	0	0	0
FAM222B	0	0	0	0	-0.670505	0	0	0	0
KCNC3	0	0	0	0	-0.670631	0	0	0	0
IL34	0	0	0	0	-0.670705	0	0	0	0
KCTD1	0	0	0	0	-0.671177	0	0	0	0
GBP11	0	0	0	0	-0.67164	0	0	0	0
EPPK1	0	0	0	0	-0.671718	0	0	0	0
TNS1	0	0	0	0	-0.671812	0	0	0	0
1700001L05RIK	0	0	0	0	-0.672773	0	0	0	0
CYP3A11	0	0	0	0	-0.672866	0	0	0	0
SPATA2L	0	0	0	0	-0.672871	0	0	0	0
NCOA6	0	0	0	0	-0.672889	0	0	0	0
UBALD1	0	0	0	0	-0.674045	0	0	0	0
TRAM2	0	0	0	0	-0.674063	0	0	0	0
PROSER1	0	0	0	0	-0.674573	0	0	0	0
KIF20A	0	0	0	0	-0.67474	0	0	0	0
PIGT	0	0	0	0	-0.675065	0	0	0	0
ALPL	0	0	0	0	-0.676768	0	0	0	0
SELPLG	0	0	0	0	-0.676885	0	0	1	0
HEYL	0	0	0	0	-0.678385	0	0	0	0
ATG13	0	0	0	0	-0.679173	0	0	0	0
AADAT	0	0	0	0	-0.679278	0	0	0	0
4933404O12RIK	0	0	0	0	-0.679425	0	0	0	0
GM42547	0	0	0	0	-0.681577	0	0	0	0
GM15889	0	0	0	0	-0.683062	0	0	0	0
SEMA4D	0	0	0	0	-0.683344	1	0	0	0
RSAD2	0	0	0	0	-0.683868	0	0	0	0
TMEM176A	0	0	0	0	-0.683933	0	0	0	0
CD300E	0	0	0	0	-0.685876	0	0	0	0
ZC3H3	0	0	0	0	-0.686298	0	0	0	0
CD14	0	0	0	0	-0.686357	0	0	0	0
TMEM86B	0	0	0	0	-0.687468	0	0	0	0
CDK1	0	0	0	0	-0.687674	0	0	0	0
NOCT	0	0	0	0	-0.688288	0	0	0	0
SETD7	0	0	0	0	-0.688583	0	0	0	0
MAST3	0	0	0	0	-0.689028	0	0	0	0
APBB1IP	0	0	0	0	-0.690954	1	0	1	0
FSCN1	0	0	0	0	-0.692697	0	0	0	0
ARID5B	0	0	0	0	-0.692937	0	0	0	0
KDM6B	0	0	0	0	-0.693077	0	0	0	0
SCAMP3	1	0	0	0	-0.693224	0	0	0	0
EIF3B	0	0	0	0	-0.695034	0	0	0	0
RAC2	0	0	0	0	-0.69545	2	0	0	0
NT5DC3	0	0	0	0	-0.695546	0	0	0	0
TFRC	0	0	0	0	-0.695951	0	0	0	0
UBQLN2	0	0	0	0	-0.696807	0	0	0	0
GSE1	0	0	0	0	-0.696874	0	0	0	0
COL15A1	0	0	0	0	-0.697778	0	0	0	0
YIPF3	0	0	0	0	-0.697962	0	0	0	0
MUP14	0	0	0	0	-0.698335	0	0	0	0
CSRNP1	0	0	0	0	-0.698543	0	0	0	0
FAM206A	0	0	0	0	-0.701187	0	0	0	0
SMAP2	0	0	0	0	-0.701997	0	0	0	0
NPDC1	0	0	0	0	-0.703079	0	0	0	0
ARHGDIA	0	0	0	0	-0.703861	0	1	0	0
MPEG1	0	0	0	0	-0.704006	0	0	1	0
PDE10A	0	0	0	0	-0.704765	0	0	0	0
CARD10	0	0	0	0	-0.705707	0	0	0	0
ALDH18A1	0	0	0	0	-0.706558	0	0	0	0
BAK1	0	0	0	0	-0.706591	0	0	0	0
IFIT3	0	0	0	0	-0.706853	0	0	0	0
ZYX	0	0	0	0	-0.708026	0	0	0	0
WBP2	0	0	0	0	-0.708354	0	0	0	0
TRF	0	0	0	0	-0.708366	0	0	0	0
2900026A02RIK	0	0	0	0	-0.709267	0	0	0	0
GPX7	0	0	0	0	-0.709791	0	0	0	0
DCAKD	0	0	0	0	-0.710017	0	0	0	0
CHERP	0	0	0	0	-0.711664	0	0	0	0
GSTM3	0	0	0	0	-0.711726	0	0	0	0
BCORL1	0	0	0	0	-0.711796	0	0	0	0
BICRA	0	0	0	0	-0.7127	0	0	0	0
LPL	0	0	0	0	-0.713538	0	0	1	0
GM14097	0	0	0	0	-0.713568	0	0	0	0
POU2F2	0	0	0	0	-0.714153	0	0	0	0
AI661453	0	0	0	0	-0.714153	0	0	0	0
RNF26	0	0	0	0	-0.714685	0	0	0	0
SUSD2	0	0	0	0	-0.71486	0	0	0	0
GM24187	0	0	0	0	-0.715991	0	0	0	0
CDK18	0	0	0	0	-0.716259	0	0	0	0
SPIC	0	0	0	0	-0.719192	0	0	1	0
SNCA	0	0	0	0	-0.719294	0	0	0	0
GM47976	0	0	0	0	-0.719512	0	0	0	0
B930095G15RIK	0	0	0	0	-0.720992	0	0	0	0
OASL1	0	0	0	0	-0.721146	1	0	0	0
POLR2A	0	0	0	0	-0.722109	0	0	0	0
KANTR	0	0	0	0	-0.723136	0	0	0	0
SLC9A3R1	0	0	0	0	-0.723467	0	0	0	0
REEP6	0	0	0	0	-0.72446	0	0	0	0
NCL	0	0	0	0	-0.724769	0	0	0	0
ZFP750	0	0	0	0	-0.725018	0	0	0	0
ETNK2	0	0	0	0	-0.72555	0	0	0	0
CORO2B	0	0	0	0	-0.725725	0	0	0	0
BMP7	0	0	0	0	-0.726093	0	0	0	0
NUCB2	0	0	0	0	-0.726098	0	0	0	0
CHAC1	0	0	0	0	-0.726714	0	0	0	0
BTG2	0	0	0	0	-0.726778	0	0	0	0
PHPT1	0	0	0	0	-0.727055	0	0	0	0
TEF	0	0	0	0	-0.727797	0	0	0	0
CCNE1	0	0	0	0	-0.728065	0	0	0	0
TTC39A	0	0	0	0	-0.729145	1	0	0	0
TSC22D4	0	0	0	0	-0.73006	0	0	0	0
TCEAL8	0	0	0	0	-0.731298	1	0	1	0
GM48199	0	0	0	0	-0.731614	0	0	0	0
CD300LF	0	0	0	0	-0.732058	0	0	1	0
CD24A	0	0	0	0	-0.732157	0	0	0	0
TAF15	0	0	0	0	-0.732606	0	0	0	0
ADGRF1	0	0	1	0	-0.735339	0	0	0	0
EPAS1	0	0	0	0	-0.735985	0	0	0	0
BCL9	0	0	0	0	-0.736127	0	0	0	0
MID1	0	0	0	0	-0.736894	0	0	0	0
FDPS	0	0	0	0	-0.737084	0	0	0	0
FKBP5	0	0	0	0	-0.737197	1	0	0	0
SF3A2	0	0	0	0	-0.737249	0	0	0	0
GM43314	0	0	0	0	-0.739094	0	0	0	0
FMO5	0	0	0	0	-0.740188	0	0	0	0
ZMIZ1	0	0	0	0	-0.741922	0	0	0	0
MT-CO1	0	0	0	0	-0.742675	0	0	0	0
LOXL2	0	0	0	0	-0.74307	0	0	0	0
SOX12	0	0	0	0	-0.743289	0	0	0	0
HSPA1B	0	0	0	0	-0.743351	0	0	0	0
AU020206	0	0	0	0	-0.745275	0	0	0	0
IFI207	0	0	0	0	-0.747014	0	0	1	0
PRELP	0	0	0	0	-0.748061	0	0	0	0
LRRC32	0	0	0	0	-0.751004	0	0	0	0
TTYH3	0	0	0	0	-0.751069	0	0	0	0
C1RB	0	0	0	0	-0.752525	0	0	0	0
LAD1	0	0	0	0	-0.752677	0	0	0	0
OGN	0	0	0	0	-0.753203	0	0	0	0
SOD3	0	0	0	0	-0.753572	0	0	0	0
CIB3	0	0	0	0	-0.754089	0	0	0	0
SLCO2A1	0	0	0	0	-0.755843	0	0	0	0
PTGFRN	0	0	0	0	-0.756258	0	0	0	0
GATAD2B	0	0	0	0	-0.757014	0	0	0	0
MT-ND5	0	0	0	0	-0.75704	0	0	0	0
FBRS	0	0	0	0	-0.757046	0	0	0	0
TRP53INP2	0	0	0	0	-0.757835	0	0	0	0
ACSM2	1	0	0	0	-0.757955	0	0	0	0
GPSM3	0	0	0	0	-0.759065	0	0	0	0
TGM1	0	0	0	0	-0.759583	0	0	0	0
MT-ND1	0	0	0	0	-0.759617	0	0	0	0
SSTR2	0	0	0	0	-0.760516	0	0	0	0
IFIT3B	0	0	0	0	-0.760524	0	0	1	0
ZFP395	0	0	0	0	-0.760579	0	0	0	0
IGFBP1	0	0	0	0	-0.761398	0	0	0	0
ENTPD2	0	0	0	0	-0.761496	0	0	0	0
BHLHE40	0	0	0	0	-0.761655	0	0	0	0
TAF9B	0	0	0	0	-0.76255	0	0	0	0
SLC7A1	0	0	0	0	-0.763572	0	0	0	0
TRP53	0	0	0	0	-0.764003	0	0	0	0
ARHGEF26	0	0	0	0	-0.764556	0	0	0	0
PRRC2A	0	0	0	0	-0.76585	0	0	0	0
INTS9	0	0	0	0	-0.766897	0	0	0	0
RHOG	0	0	0	0	-0.76787	0	0	0	0
KLF13	0	0	0	0	-0.76809	0	0	0	0
CARD6	0	0	0	0	-0.768594	0	0	0	0
CLMN	0	0	0	0	-0.768702	0	0	0	0
H19	0	0	0	0	-0.769684	0	0	0	0
CCDC97	0	0	0	0	-0.770485	0	0	0	0
HBA-A2	0	0	0	0	-0.771059	0	0	0	0
CDCA8	0	0	0	0	-0.771877	0	0	0	0
ALDH1B1	0	0	0	0	-0.772166	0	0	0	0
PCBP1	0	0	0	0	-0.772488	0	0	0	0
ARMCX4	0	0	0	0	-0.774011	0	0	1	0
SLC13A5	0	0	0	0	-0.77564	0	0	0	0
WIZ	0	0	0	0	-0.775856	0	0	0	0
AGAP2	0	0	0	0	-0.776007	0	0	0	0
CYB561	0	0	0	0	-0.776443	1	0	0	0
SLC25A23	0	0	0	0	-0.777361	0	0	0	0
ENHO	0	0	0	0	-0.777372	0	0	0	0
DUSP8	0	0	0	0	-0.779288	0	0	0	0
SLC41A3	0	0	0	0	-0.779573	0	0	0	0
DNASE1L3	0	0	0	0	-0.779883	0	0	0	0
TLR7	0	0	0	0	-0.781645	0	0	0	0
RBP1	0	0	0	0	-0.782396	1	0	0	0
INF2	0	0	0	0	-0.783366	0	0	0	0
SQLE	0	0	0	0	-0.783458	0	0	0	0
CXCL14	0	0	0	0	-0.786831	0	0	0	0
NFIX	0	0	0	0	-0.786927	0	0	0	0
ZFHX2	0	0	0	0	-0.787589	0	0	0	0
CXCL9	0	0	0	0	-0.787614	0	0	0	0
HBB-BT	0	0	0	0	-0.789075	0	0	0	0
LYVE1	0	0	0	0	-0.789657	0	0	1	0
CAMTA2	0	0	0	0	-0.790256	0	0	0	0
IFI208	0	0	0	0	-0.790381	0	0	1	0
COL4A2	0	0	0	0	-0.791027	0	0	1	0
MX1	0	0	0	0	-0.791265	1	0	1	0
LONRF1	0	0	0	0	-0.792818	0	0	0	0
BMPER	0	0	0	0	-0.793564	0	0	0	0
RERE	0	0	0	0	-0.795305	0	0	0	0
CHAF1B	0	0	0	0	-0.795971	0	0	0	0
HNF1B	0	0	0	0	-0.796329	0	0	0	0
SERPINA4-PS1	0	0	0	0	-0.797275	0	0	0	0
FAM98B	0	0	0	0	-0.800134	0	0	0	0
ATXN2L	0	0	0	0	-0.800244	0	0	0	0
PHC1	0	0	0	0	-0.800355	0	0	0	0
1810055G02RIK	0	0	0	0	-0.800791	0	0	0	0
CDC42EP1	0	0	0	0	-0.800824	0	0	0	0
DHCR7	0	0	0	0	-0.802826	0	0	0	0
SLC43A1	0	0	0	0	-0.803753	0	0	0	0
GM30784	0	0	0	0	-0.80501	0	0	0	0
MFSD4A	0	0	0	0	-0.805249	0	0	0	0
SLC16A6	0	0	0	0	-0.80539	0	0	0	0
GM14719	0	0	0	0	-0.808397	0	0	0	0
BLNK	0	0	0	0	-0.810213	0	0	0	0
EGFR	0	0	0	0	-0.810636	0	0	0	0
BGN	0	0	0	0	-0.811184	0	0	0	0
NFIC	0	0	0	0	-0.815331	0	0	0	0
MFSD13A	0	0	0	0	-0.816437	0	0	0	0
ADAP2OS	0	0	0	0	-0.817179	0	0	0	0
TOP2A	0	0	0	0	-0.818986	0	0	0	0
CRTC2	0	0	0	0	-0.820821	0	0	0	0
SOX7	0	0	0	0	-0.822323	0	0	0	0
TNFRSF1B	0	0	0	0	-0.822382	0	0	0	0
CD4	0	0	0	0	-0.82571	0	0	0	0
TAT	0	0	0	0	-0.825959	0	0	0	0
SPRED2	0	0	0	0	-0.826037	0	0	0	0
FADS3	0	0	0	0	-0.826952	0	0	0	0
MIDN	0	0	0	0	-0.827735	0	0	0	0
G6PDX	0	0	0	0	-0.828305	0	0	0	0
ANG	0	0	0	0	-0.831648	0	0	0	0
ZFP970	0	0	0	0	-0.83241	0	0	0	0
CTNND1	0	0	0	0	-0.834789	0	0	0	0
ALG8	0	0	0	0	-0.836535	0	0	0	0
MDH1	0	0	0	0	-0.836623	0	0	0	0
SLC38A3	0	0	0	0	-0.837239	0	0	0	0
GRK3	0	0	0	0	-0.839244	1	0	0	0
TNC	0	0	0	0	-0.839275	0	0	0	0
SRRM1	0	0	0	0	-0.846534	0	0	0	0
GM21399	0	0	0	0	-0.84888	0	0	0	0
FOXO1	0	0	0	0	-0.848888	0	0	0	0
SP2	0	0	0	0	-0.849661	0	0	0	0
BRPF3	0	0	0	0	-0.849826	0	0	0	0
PPRC1	0	0	0	0	-0.851462	0	0	0	0
BHLHB9	0	0	0	0	-0.852128	0	0	1	0
C77080	0	0	0	0	-0.852498	0	0	0	0
2310061I04RIK	0	0	0	0	-0.855427	0	0	0	0
CDH1	0	0	0	0	-0.857778	0	0	0	0
ZFP362	0	0	0	0	-0.857781	0	0	0	0
GRHL1	0	0	0	0	-0.858721	0	0	0	0
SCMH1	0	0	0	0	-0.858872	0	0	0	0
BCL9L	0	0	0	0	-0.860655	0	0	0	0
MFAP4	0	0	0	0	-0.860709	0	0	0	0
ZFP609	0	0	0	0	-0.862498	0	0	0	0
FARP1	0	0	0	0	-0.863952	0	0	0	0
CYP21A1	0	0	0	0	-0.864751	0	0	1	0
RASGEF1B	0	0	0	0	-0.865304	0	0	0	0
PDK2	0	0	0	0	-0.866488	0	0	0	0
PER2	0	0	0	0	-0.869992	0	0	0	0
AA986860	0	0	0	0	-0.871931	0	0	0	0
CYP17A1	0	0	0	0	-0.872613	1	0	1	0
RIPOR1	0	0	0	0	-0.873945	0	0	0	0
SLC25A48	0	0	0	0	-0.875954	0	0	0	0
CNTNAP1	0	0	0	0	-0.876984	0	0	0	0
FOXP4	0	0	0	0	-0.87872	0	0	0	0
4930452B06RIK	0	0	0	0	-0.879706	0	0	0	0
BHLHE41	0	0	0	0	-0.879786	0	0	0	0
NOS1AP	0	0	0	0	-0.880004	0	0	0	0
FABP5	0	0	0	0	-0.880532	0	0	0	0
IFI44	0	0	0	0	-0.881693	1	0	2	0
SIGLECE	0	0	0	0	-0.882015	1	0	0	0
A2ML1	0	0	0	0	-0.884355	0	0	0	0
GOT1	0	0	0	0	-0.888224	0	0	0	0
PARVB	0	0	0	0	-0.888287	0	0	0	0
CYP2F2	0	0	0	0	-0.889587	0	0	0	0
TUBA8	0	0	0	0	-0.889702	1	0	0	0
MKNK2	0	0	0	0	-0.892113	0	0	0	0
ISYNA1	0	0	0	0	-0.893862	0	0	0	0
CREB3L1	0	0	0	0	-0.894244	0	0	0	0
GM45609	0	0	0	0	-0.894367	0	0	0	0
BRD4	0	0	0	0	-0.897301	0	0	0	0
EPOP	0	0	0	0	-0.899582	0	0	0	0
UBAP2	0	0	0	0	-0.900256	0	0	0	0
CCNK	0	0	0	0	-0.901493	0	0	0	0
SMPD3	0	0	0	0	-0.901882	0	0	0	0
TCF7L1	0	0	0	0	-0.902885	0	0	0	0
CBARP	0	0	0	0	-0.905337	0	0	0	0
PHACTR4	0	0	0	0	-0.907066	0	0	0	0
OAS2	0	0	0	0	-0.907088	1	0	1	0
GBP5	0	0	0	0	-0.907332	0	0	0	0
PRR12	0	0	0	0	-0.908064	0	0	0	0
LY6E	0	0	0	0	-0.909121	0	0	0	0
ATP1A2	0	0	0	0	-0.90992	0	0	0	0
WNK4	0	0	0	0	-0.912286	0	0	0	0
ATP4A	0	0	0	0	-0.914285	0	0	0	0
EIF4EBP2	0	0	0	0	-0.914661	0	0	0	0
ZFP703	0	0	0	0	-0.917579	0	0	0	0
PNPLA2	0	0	0	0	-0.9188	0	0	0	0
MBD6	0	0	0	0	-0.919521	0	0	0	0
ZMIZ2	0	0	0	0	-0.925953	0	0	0	0
GM38070	0	0	0	0	-0.928647	0	0	0	0
SEMA4G	0	0	0	0	-0.930826	0	0	0	0
SLC35C1	0	0	0	0	-0.931076	0	0	0	0
FAM81A	0	0	0	0	-0.931224	0	0	0	0
OAS3	0	0	0	0	-0.931279	2	0	1	0
FMN2	0	0	0	0	-0.9355	0	0	0	0
TNFSF12	0	0	0	0	-0.937163	0	0	0	0
RAB36	0	0	0	0	-0.938512	0	0	0	0
COL5A2	0	0	0	0	-0.941228	1	0	0	0
CDC20	0	0	0	0	-0.942507	0	0	0	0
ACMSD	0	0	0	0	-0.944089	0	0	0	0
GM10705	0	0	0	0	-0.94685	0	0	0	0
DVL3	0	0	0	0	-0.94747	0	0	0	0
CYP4F16	0	0	0	0	-0.94897	1	0	1	0
USP18	0	0	0	0	-0.949005	0	0	1	0
FAM222A	0	0	0	0	-0.952032	0	0	0	0
CYP3A59	0	0	0	0	-0.953133	0	0	0	0
SORBS3	0	0	0	0	-0.954057	0	0	0	0
LRG1	0	0	0	0	-0.955243	0	0	0	0
ZDHHC9	0	0	0	0	-0.956561	0	0	0	0
ATF7	0	0	0	0	-0.958099	0	0	0	0
TGTP1	0	0	0	0	-0.958158	1	0	1	0
IL1RN	0	0	0	0	-0.96005	0	0	0	0
PEG10	0	0	0	0	-0.961816	0	0	0	0
OASL2	0	0	0	0	-0.963827	0	0	1	0
POM121	0	0	0	0	-0.96425	0	0	0	0
UPP2	0	0	0	0	-0.96476	0	0	0	0
ALAS1	0	0	0	0	-0.965778	0	0	0	0
PHLDA1	0	0	0	0	-0.966719	0	0	0	0
IFI203-PS	0	0	0	0	-0.968344	0	0	0	0
MUP11	0	0	0	0	-0.971584	0	0	0	0
PLAGL1	0	0	0	0	-0.975623	0	0	0	0
DBP	0	0	0	0	-0.97944	0	0	0	0
NCOR2	0	0	0	0	-0.983159	0	0	0	0
A1BG	0	0	0	0	-0.983237	0	0	0	0
TGFB1I1	0	0	0	0	-0.985365	0	0	0	0
C5AR1	0	0	0	0	-0.988574	0	0	0	0
SLFN9	0	0	0	0	-0.991464	0	0	0	0
PLS1	0	0	0	0	-0.992601	0	0	0	0
ALPK1	0	0	0	0	-0.992654	0	0	0	0
LEPR	0	0	0	0	-0.993011	1	0	1	0
NREP	0	0	0	0	-0.996231	0	0	0	0
MYADM	0	0	0	0	-0.998809	0	0	0	0
IFIT1	0	0	0	0	-1.00476	0	0	1	0
CCNA2	0	0	0	0	-1.00513	0	0	0	0
NME2	0	0	0	0	-1.00752	0	0	0	0
WIPF3	0	0	0	0	-1.0153	0	0	0	0
1810046K07RIK	0	0	0	0	-1.01664	0	0	0	0
WEE1	0	0	0	0	-1.01745	0	0	0	0
SETD1B	0	0	0	0	-1.0238	0	0	0	0
CLEC4A1	0	0	0	0	-1.02488	0	0	0	0
R3HDM2	0	0	0	0	-1.02734	0	0	0	0
TEAD1	0	0	0	0	-1.03714	0	0	0	0
GM42418	0	0	0	0	-1.03769	0	0	0	0
TMEM119	0	0	0	0	-1.03786	0	0	0	0
TUBB6	0	0	0	0	-1.03792	0	0	0	0
HYPK	0	0	0	0	-1.04174	0	0	0	0
PER3	0	0	0	0	-1.04311	0	0	0	0
SRRM4	0	0	0	0	-1.04427	0	0	0	0
CRYBB3	0	0	0	0	-1.0476	0	0	0	0
GSTP-PS	0	0	0	0	-1.04946	0	0	0	0
STEAP4	0	0	0	0	-1.04953	0	0	0	0
CSF2RB2	0	0	0	0	-1.05636	0	0	0	0
NR1D1	0	0	0	0	-1.05746	0	0	0	0
CHRNA4	0	0	0	0	-1.05841	0	0	0	0
GM3839	0	0	0	0	-1.05849	0	0	0	0
MAP3K6	0	0	0	0	-1.05891	0	0	0	0
SCNN1A	0	0	0	0	-1.05986	0	0	0	0
2900009J06RIK	0	0	0	0	-1.06081	0	0	0	0
ULK1	0	0	0	0	-1.06165	0	0	0	0
ESM1	0	0	0	0	-1.06187	0	0	0	0
GRIA3	0	0	0	0	-1.06658	0	0	0	0
MYC	0	0	0	0	-1.0668	0	0	0	0
CCND1	0	0	0	0	-1.06736	0	0	0	0
SERPINA1E	0	0	0	0	-1.06752	0	0	0	0
GM15690	0	0	0	0	-1.06937	0	0	0	0
BC021767	0	0	0	0	-1.06961	0	0	0	0
BCL3	0	0	0	0	-1.07105	0	0	0	0
FGFR1	0	0	0	0	-1.07469	0	0	0	0
KCNK1	0	0	0	0	-1.0753	0	0	0	0
COL1A1	0	0	0	0	-1.08632	0	0	0	0
GM47283	0	0	0	0	-1.0865	0	0	0	0
PPP1R3G	0	0	0	0	-1.09234	0	0	0	0
CYP4A12A	2	0	1	0	-1.09916	0	0	0	0
SLC25A22	0	0	0	0	-1.10391	0	0	0	0
SERPINA3N	0	0	0	0	-1.1043	0	0	0	0
UGT2B38	1	0	0	0	-1.1188	0	0	0	0
MKI67	0	0	0	0	-1.12408	0	0	0	0
CYP4A12B	0	0	0	0	-1.12685	0	0	0	0
RPL24	0	0	0	0	-1.12884	0	0	0	0
SYT12	0	0	0	0	-1.12958	0	0	0	0
GM7694	0	0	0	0	-1.13431	0	0	0	0
CYP2B10	0	0	0	0	-1.13682	0	0	0	0
GREM2	0	0	0	0	-1.13685	0	0	0	0
UCP2	0	0	0	0	-1.13848	0	0	0	0
MUP13	0	0	0	0	-1.14937	0	0	0	0
SLC13A2	0	0	0	0	-1.14959	0	0	0	0
ATN1	0	0	0	0	-1.15096	0	0	0	0
PYGM	0	0	0	0	-1.17251	0	0	0	0
IFI206	0	0	0	0	-1.17265	0	0	1	0
PER1	0	0	0	0	-1.18145	0	0	0	0
MAFB	0	0	0	0	-1.19058	0	0	0	0
CD276	0	0	0	0	-1.19448	0	0	0	0
MUP6	0	0	0	0	-1.19762	0	0	0	0
CYP4A31	0	0	0	0	-1.20502	0	0	0	0
FOXQ1	0	0	0	0	-1.20845	0	0	0	0
ADCY1	0	0	0	0	-1.21647	0	0	0	0
GM10443	0	0	0	0	-1.21701	0	0	0	0
HSPA1A	0	0	0	0	-1.23722	0	0	0	0
GPCPD1	0	0	0	0	-1.25577	0	0	0	0
EGR1	0	0	0	0	-1.25657	0	0	0	0
1700018L02RIK	0	0	0	0	-1.26923	0	0	0	0
CES4A	0	0	0	0	-1.27218	0	0	0	0
ST8SIA3	0	0	0	0	-1.2744	0	0	0	0
MT-CYTB	0	0	0	0	-1.28394	0	0	0	0
RPS10	0	0	0	0	-1.29807	0	0	0	0
MUP17	0	0	0	0	-1.30619	0	0	0	0
A930033H14RIK	0	0	0	0	-1.3093	0	0	0	0
NRG4	0	0	0	0	-1.32343	0	0	0	0
SCARA5	0	0	0	0	-1.32492	0	0	0	0
HAMP2	0	0	0	0	-1.32553	0	0	0	0
GM4070	0	0	0	0	-1.33463	0	0	0	0
PFKFB3	0	0	0	0	-1.3418	0	0	0	0
SELENBP2	0	0	0	0	-1.36872	0	0	0	0
CES2B	0	0	0	0	-1.37231	0	0	0	0
CISH	0	0	0	0	-1.37857	0	0	0	0
MT-ND4	0	0	0	0	-1.38696	0	0	0	0
RPL38-PS2	0	0	0	0	-1.38857	0	0	0	0
ONECUT1	0	0	1	0	-1.39354	0	0	0	0
MUP10	0	0	0	0	-1.39974	0	0	0	0
WDR74	0	0	0	0	-1.41005	0	0	0	0
GM16378	0	0	0	0	-1.41057	0	0	0	0
GUCY2C	0	0	0	0	-1.41304	0	0	0	0
AI506816	0	0	0	0	-1.42035	0	0	0	0
LPIN1	0	0	0	0	-1.43695	2	0	0	0
SLC37A1	0	0	0	0	-1.4414	0	0	0	0
TFF3	0	0	0	0	-1.44251	2	0	1	0
SLC39A4	0	0	0	0	-1.46812	0	0	0	0
GM8121	0	0	0	0	-1.47305	0	0	0	0
GVIN1	0	0	0	0	-1.4792	0	0	0	0
USP2	0	0	0	0	-1.48662	0	0	0	0
MOXD1	2	0	1	0	-1.49639	0	0	0	0
HCN3	0	0	0	0	-1.50034	0	0	0	0
MT-TL1	0	0	0	0	-1.53083	0	0	0	0
MT-TM	0	0	0	0	-1.54106	0	0	0	0
MUP-PS22	0	0	0	0	-1.55009	0	0	0	0
LARS2	0	0	0	0	-1.55349	0	0	0	0
GM42031	0	0	0	0	-1.5721	0	0	0	0
MUP-PS20	0	0	0	0	-1.63968	0	0	0	0
GNAT1	0	0	0	0	-1.64063	0	0	0	0
ASNS	0	0	0	0	-1.64609	0	0	0	0
MIR6236	0	0	0	0	-1.6716	0	0	0	0
GM19572	0	0	0	0	-1.70678	0	0	0	0
GM15564	0	0	0	0	-1.70836	0	0	0	0
MYLPF	0	0	0	0	-1.72289	0	0	0	0
GM15920	0	0	0	0	-1.74704	0	0	0	0
DNAIC1	0	0	0	0	-1.81943	0	0	0	0
ORM2	0	0	0	0	-1.83895	0	0	0	0
CYP2A4	0	0	0	0	-1.8871	0	0	0	0
GM43305	0	0	0	0	-1.89313	0	0	0	0
RGS9	0	0	0	0	-1.91139	0	0	0	0
SAA1	0	0	0	0	-2.2642	0	0	0	0
GM14513	0	0	0	0	-2.37068	0	0	0	0
N-R5-8S1	0	0	0	0	-2.41547	0	0	0	0
MUP9	0	0	0	0	-2.4588	0	0	0	0
CIART	0	0	0	0	-2.50126	0	0	0	0
GM10801	0	0	0	0	-2.50862	0	0	0	0
PRTN3	0	0	0	0	-2.5415	0	0	0	0
MT-TE	0	0	0	0	-2.83737	0	0	0	0
GM10800	0	0	0	0	-2.94707	0	0	0	0
SAA2	0	0	0	0	-3.021	0	0	0	0
GM21738	0	0	0	0	-3.03395	0	0	0	0
LCN2	0	0	0	0	-3.16759	1	0	2	0
TNNI2	0	0	0	0	-3.20084	1	0	0	0
MT1	0	0	0	0	-3.29624	1	0	1	0
MT2	0	0	0	0	-3.42559	1	0	1	0

## Sheet: SuppTable3c
Supplemental Table 3c: Enhancer LAAsP-mods linked to LAAsP genes from '5mo Adult Veh over 3wk Weanling Veh' comparison (Figure 4c)
Number of peaks in enhancers (for each histone mark) linked to DEGs (Enhancer Atlas, merged anchors)
Genes	Peak count for H3K27ac up peaks	Peak count for H3K4me1 up peaks	Peak count for H3K4me3 up peaks	Peak count for H3K27me3 down peaks	M liver LAAsP genes (3wk to 5mo)	Peak count for H3K27ac down peaks	Peak count for H3K4me1 down peaks	Peak count for H3K4me3 down peaks	Peak count for H3K27me3 up peaks
Mup7	0	0	0	0	12.1869	0	1	0	0
Mup11	0	0	0	0	11.0994	0	0	0	0
Mup14	0	0	0	0	11.0128	0	0	0	0
Moxd1	0	0	11	2	10.9795	1	0	0	0
Mup17	0	0	0	0	10.7085	0	0	0	0
Mup15	0	0	0	0	10.1628	0	0	0	0
Mup1	0	0	0	0	9.84936	0	0	0	0
Mup9	0	0	0	0	9.22637	0	0	0	0
Mup12	0	0	0	0	9.07603	0	0	0	0
Mup16	0	0	0	0	8.51152	0	0	0	0
Mup21	5	0	3	0	8.13185	0	1	0	0
Cyp4a12a	3	1	3	1	7.93263	2	0	2	0
Cyp4a12b	1	1	4	2	7.86739	3	0	3	0
Mup18	0	0	0	0	7.65373	0	0	0	0
Mup20	5	0	3	0	7.51704	0	1	0	0
Elovl3	3	1	2	8	7.49924	3	0	4	0
Nat8f5	0	0	0	0	7.29761	0	0	0	0
Mup8	0	0	0	0	6.91891	0	0	0	0
Gm4756	0	0	0	0	6.72987	0	0	0	0
Saa2	1	0	0	0	6.27771	2	0	2	0
Nat8	14	5	5	0	6.25231	0	1	0	0
Cyp7b1	5	9	0	0	6.03049	0	0	0	0
Slc22a28	0	0	0	0	5.93377	3	1	2	0
Capn8	1	1	13	0	5.62863	9	9	4	0
Grm8	5	1	4	5	5.60213	0	0	3	0
Trhde	2	3	0	2	5.57063	0	0	0	0
Nox4	8	8	8	0	5.41624	0	0	0	0
Ugt2b38	2	1	1	0	5.41389	2	1	1	0
Slc15a5	0	0	10	0	5.20703	0	0	0	0
Scara5	20	22	10	0	5.18106	13	0	10	0
Saa1	1	0	0	0	5.16277	3	0	2	0
Tiam2	11	2	9	11	4.64222	5	1	15	0
C6	0	0	0	0	4.60682	0	0	2	0
Lad1	14	14	31	22	4.57881	17	11	2	0
Hspb1	18	1	25	0	4.55337	24	11	30	0
Ar	0	0	0	0	4.52087	0	0	0	0
Slc10a2	0	0	0	0	4.50913	0	2	2	0
Orm2	14	4	11	2	4.40438	13	18	0	0
Serpina12	0	0	3	0	4.39961	4	2	1	0
Hsd3b5	0	0	1	0	4.16039	3	1	2	0
Mup3	4	0	1	0	3.98306	0	1	0	0
Susd4	10	2	2	0	3.82214	5	2	1	0
Slco1a1	0	1	0	0	3.73599	0	0	2	0
Omd	17	4	14	0	3.65507	16	3	0	0
Gm3839	0	0	0	0	3.54501	0	0	0	0
Lrp2	0	4	1	0	3.37236	2	2	5	0
Ces1f	10	4	4	0	3.31313	0	0	0	0
Srd5a1	35	6	12	3	3.3051	0	0	23	0
Serpine2	2	0	0	0	3.19489	1	0	0	0
Lrit2	0	0	0	0	3.16946	0	0	0	0
Pigr	12	1	17	0	3.10762	5	4	8	0
Clstn3	24	1	4	9	3.0749	28	10	0	0
Wfdc21	0	0	0	0	3.07343	0	0	0	0
Cyp2c38	0	0	0	0	3.06834	0	0	0	0
Cyp2c67	0	0	0	0	2.89588	0	0	0	0
Sytl1	31	7	131	0	2.88201	46	5	37	0
Srgap3	0	0	0	9	2.87699	4	6	0	0
Gpc1	12	0	0	5	2.86531	1	9	24	0
Cnmd	0	0	0	0	2.86096	0	0	0	0
Hamp	4	0	11	0	2.85534	6	0	0	0
Dct	0	0	0	6	2.85129	0	0	1	0
Slc41a2	14	7	9	0	2.82554	2	0	0	0
Serpina1e	0	0	1	0	2.75051	5	0	0	0
Cadm4	8	0	17	1	2.68478	11	0	1	0
C9	0	0	2	0	2.66739	0	4	0	0
Ces3b	4	2	0	0	2.66468	0	0	0	0
Cebpe	4	0	2	1	2.65382	2	0	23	0
Orm1	15	3	12	0	2.63005	12	21	1	0
Gm14327	3	0	4	0	2.61284	0	0	0	0
Osbpl3	42	1	34	0	2.60804	2	0	6	0
Ces2c	6	4	0	0	2.5985	0	0	5	0
Plekhb1	5	0	23	0	2.5826	16	14	5	0
Gstp1	41	1	33	0	2.55649	3	3	82	0
Ugt3a1	1	0	2	0	2.55485	1	0	0	0
Npr2	26	3	61	0	2.54022	2	5	12	0
Mapk15	8	0	26	14	2.51897	6	6	0	0
Cidec	0	0	17	0	2.48368	3	0	0	0
Zfp982	0	0	0	0	2.46455	0	0	0	0
Syt3	0	0	0	4	2.4577	2	2	6	0
Acpp	6	0	3	0	2.43769	0	3	0	0
Cyp2d9	2	0	1	0	2.43717	6	0	3	0
Fitm1	8	2	30	6	2.4129	2	7	25	0
Atp11a	29	30	3	104	2.36622	0	4	23	0
Gstp2	36	0	29	0	2.34321	3	3	41	0
9130409I23Rik	21	0	10	0	2.32524	2	0	3	0
Olig1	9	3	0	12	2.32456	9	0	6	0
Cyp26a1	4	0	0	0	2.28504	6	4	0	0
S1pr5	13	0	20	17	2.28346	6	5	13	0
Lama3	1	1	3	0	2.26475	7	1	6	0
Nnmt	13	8	31	0	2.20651	35	3	4	0
Lcn2	1	0	13	3	2.20293	20	14	48	0
Disp2	5	2	10	30	2.18089	32	0	16	0
Olfm3	4	0	4	0	2.15712	0	0	0	0
Slc22a30	1	0	3	0	2.15525	3	1	2	0
Slc3a1	0	0	1	0	2.15221	0	0	0	0
Treh	5	4	8	2	2.14762	1	1	17	0
Mfsd2a	7	11	61	0	2.13991	7	8	5	0
Aatk	25	0	2	0	2.10895	28	14	10	0
Cyp2u1	21	5	12	14	2.10658	0	0	20	0
Zap70	0	0	9	0	2.09198	57	6	6	0
Etfbkmt	0	0	0	0	2.08527	0	0	0	0
Mme	6	6	0	0	2.08377	0	0	0	0
Sult2a7	0	0	0	0	2.03757	0	0	0	0
Kctd15	6	6	25	0	2.01841	0	3	5	0
Cabyr	11	13	19	0	2.00613	2	0	0	0
Mcm10	6	42	3	3	1.98924	4	2	15	0
Cib3	0	0	0	0	1.97647	15	3	3	0
Zfp809	26	19	59	14	1.97247	27	2	27	0
Keg1	2	5	4	0	1.96655	1	0	3	0
Dpy19l3	0	0	0	0	1.95703	3	0	56	0
Nat8f2	0	0	0	0	1.95401	0	0	0	0
Acot11	48	7	18	0	1.94929	20	1	12	0
Saa3	1	0	0	0	1.9339	1	5	4	0
Jchain	0	0	0	0	1.92864	0	0	0	0
Aldh1a1	18	8	2	0	1.92428	0	0	0	0
Unc13b	3	1	47	0	1.91578	0	0	3	0
Lag3	2	0	6	28	1.91216	16	3	0	0
Sucnr1	0	0	0	0	1.90974	9	0	0	0
Aox1	24	6	14	0	1.89414	1	2	7	0
Lrg1	0	0	12	0	1.88832	8	6	21	0
Ldhd	37	0	5	0	1.88285	13	7	4	0
Proca1	4	0	18	2	1.88217	29	2	22	0
Dntt	4	0	5	0	1.87081	0	0	0	0
Apol9a	6	6	13	0	1.85334	23	6	16	0
Cdc42ep5	5	0	8	0	1.85174	5	0	3	0
2010003K11Rik	22	1	15	0	1.84855	0	0	11	0
Orm3	17	4	11	2	1.8466	11	15	0	0
Slc2a5	37	0	33	5	1.83856	24	7	0	0
Aox3	17	2	8	0	1.82647	1	0	7	0
Zfp970	0	0	0	0	1.82571	0	0	0	0
Them7	0	0	0	0	1.82226	0	0	0	0
Slc16a13	0	6	28	15	1.81759	14	3	34	0
Car3	18	0	0	0	1.81145	34	21	35	0
Gsta2	1	2	4	0	1.81126	2	0	12	0
Blnk	6	0	6	4	1.80763	0	0	0	0
Cxcl1	12	1	7	3	1.7798	1	0	3	0
Ugdh	4	0	37	0	1.77943	7	15	12	0
Derl3	0	0	43	0	1.77147	18	4	1	0
Chpt1	2	1	0	0	1.75209	0	0	0	0
Csad	14	7	73	1	1.75203	9	5	18	0
Extl1	0	0	34	14	1.74293	39	11	65	0
Rarres1	4	2	1	0	1.68877	0	0	4	0
Ggt6	18	1	4	0	1.68461	1	3	18	0
B4galnt3	6	0	11	0	1.68237	5	1	4	0
Cntnap1	21	0	20	9	1.67589	40	0	20	0
Oat	1	0	4	7	1.67355	45	0	0	0
Spsb4	21	26	7	52	1.67142	2	0	1	0
Ugt2b1	2	2	1	0	1.65821	0	0	0	0
2200002D01Rik	50	5	49	15	1.64992	23	17	34	0
Col27a1	11	2	8	0	1.64929	38	34	5	0
Ifi27	0	0	0	0	1.64541	0	0	0	0
G0s2	1	0	36	2	1.63445	5	5	10	0
Abcb1b	5	6	2	0	1.62432	1	0	18	0
Apoa4	3	0	5	0	1.62315	9	0	0	0
Cyb561	22	6	1	6	1.62258	1	0	35	0
Ttbk1	6	1	9	0	1.61975	17	1	33	0
Pnldc1	4	0	2	0	1.61594	10	22	8	0
C8a	6	0	4	0	1.60728	0	0	0	0
Sult5a1	2	1	5	7	1.58352	0	8	7	0
Bdh2	0	3	3	0	1.58222	3	10	0	0
Nudt7	14	0	7	0	1.58061	0	0	0	0
Hapln4	3	0	3	36	1.57892	5	2	15	0
Selenbp2	7	3	0	0	1.56726	3	0	1	0
Sdr9c7	0	1	3	0	1.56483	3	0	10	0
Raet1e	0	0	0	0	1.54578	0	0	0	0
Nrg4	7	0	4	0	1.53984	2	2	0	0
Mtnr1a	0	0	0	0	1.53514	0	0	0	0
Fam47e	14	0	14	0	1.5334	1	0	0	0
Crybg2	0	0	0	0	1.52134	0	0	0	0
Ces1e	12	6	6	0	1.5167	0	0	0	0
Adh4	6	3	3	0	1.5164	1	2	1	0
Plk3	6	0	3	5	1.50084	21	0	7	0
Serinc2	28	0	11	13	1.48606	3	0	27	0
Smyd1	0	0	7	0	1.477	11	2	5	0
Kcnk10	0	0	1	13	1.47133	0	0	7	0
Ces3a	6	4	0	0	1.46904	0	0	0	0
Hspa1b	0	0	18	4	1.46413	6	2	64	0
Gm14403	0	0	3	0	1.45806	0	0	0	0
Camk2n2	0	0	47	0	1.45625	4	6	56	0
Cd207	0	0	0	6	1.44651	0	2	0	0
Hsph1	0	0	0	19	1.43711	2	0	4	0
Ugt2a3	1	0	0	0	1.42967	1	0	1	0
Ly6d	17	0	30	2	1.42037	13	0	8	0
Bmyc	8	0	0	4	1.41203	3	0	19	0
Syt12	18	1	13	0	1.41044	0	1	31	0
Alas2	5	0	5	0	1.41031	0	0	0	0
Col5a3	38	4	10	17	1.40979	18	6	14	0
Cpeb1	11	0	0	1	1.40812	1	0	25	0
Ciart	0	0	0	0	1.40789	0	0	0	0
Zfp992	0	0	0	0	1.40214	0	0	0	0
Atp8b4	3	1	9	0	1.39715	0	1	0	0
Sntg2	0	0	0	0	1.3895	0	0	0	0
Retsat	85	2	116	0	1.38469	21	27	23	0
Ugt2b5	2	2	1	0	1.36795	0	0	0	0
Dlgap1	0	0	0	0	1.36003	0	0	0	0
1700037H04Rik	48	1	1	13	1.35719	12	17	17	0
Rfx4	2	1	5	0	1.35666	18	2	0	0
Cgref1	32	4	27	17	1.35653	11	8	30	0
Oasl1	11	0	10	4	1.35406	4	1	53	0
Ahcyl2	20	9	8	1	1.34812	46	10	57	0
Oplah	24	0	48	15	1.33552	9	27	28	0
Inhbe	4	0	12	0	1.3354	2	0	6	0
Tifa	25	28	22	14	1.32219	0	3	25	0
Cadps2	5	0	0	0	1.31505	0	0	0	0
Ncam2	4	0	0	0	1.31167	0	0	0	0
Mgst1	1	1	26	0	1.30873	0	0	0	0
Lamb3	0	0	43	0	1.29202	5	5	2	0
Zswim5	10	0	0	1	1.29169	5	1	5	0
Gm7694	1	0	2	0	1.28792	0	0	0	0
Slc6a16	0	0	0	0	1.28738	0	0	0	0
Neb	9	0	9	0	1.28656	5	3	4	0
Apol9b	41	2	18	0	1.27954	0	1	0	0
Adgrv1	0	0	0	0	1.27494	0	0	0	0
Ccdc171	0	0	0	0	1.27247	0	0	0	0
Plin4	0	0	18	0	1.268	8	6	26	0
Slc22a5	0	0	19	0	1.26436	38	5	10	0
Rd3	1	0	1	0	1.26327	8	1	10	0
Slc35e3	45	0	11	0	1.25043	14	6	2	0
Gabbr2	13	0	8	0	1.25008	0	0	12	0
Ttc39c	13	12	22	0	1.24943	2	0	0	0
Camk2b	15	13	6	11	1.24243	17	8	24	0
Scp2	25	30	59	22	1.23224	71	26	44	0
Cd59b	0	0	3	1	1.22963	9	0	2	0
Mypop	0	0	12	1	1.22501	19	4	10	0
Cyp2f2	11	0	42	11	1.22461	5	4	16	0
Gnat1	23	0	30	20	1.21935	5	3	31	0
Syt11	32	1	34	6	1.21764	6	5	6	0
Scd1	11	0	32	69	1.2149	11	0	2	0
Abcg2	2	1	1	0	1.209	6	6	1	0
Adra1a	3	0	2	0	1.19852	0	0	5	0
Arsa	36	14	38	6	1.19443	0	9	17	0
Cd4	0	0	8	14	1.19402	7	0	0	0
Cyp2c23	0	0	0	0	1.1939	0	0	0	0
Serpina3k	0	0	0	1	1.19001	4	2	2	0
Ephx2	23	14	29	1	1.18204	18	0	12	0
Syvn1	0	0	10	11	1.1785	20	5	7	0
Gna14	10	1	10	0	1.17678	6	0	2	0
Cys1	5	0	2	0	1.16533	16	1	22	0
Bmp7	31	0	9	10	1.16519	9	0	52	0
Dhrs9	0	0	2	0	1.16479	3	6	1	0
Mbnl2	56	19	46	0	1.16059	2	0	14	0
Sugct	0	0	0	0	1.1474	0	0	0	0
S100a10	32	0	48	4	1.12984	4	1	0	0
Tedc2	0	0	0	0	1.12914	0	0	0	0
Egfr	15	19	30	0	1.1285	27	0	2	0
Fbf1	17	2	98	8	1.12692	15	5	17	0
Hnmt	0	0	2	0	1.1247	0	0	1	0
Chrnb2	0	0	1	3	1.11182	33	15	64	0
Aldh1a7	24	6	7	0	1.10723	0	0	0	0
Reep6	34	3	52	8	1.10134	19	0	59	0
Cyp4v3	9	0	3	0	1.10132	4	0	0	0
Lrit1	0	0	0	0	1.10122	0	0	0	0
Pdilt	6	1	0	0	1.10095	2	0	2	0
Tmem19	19	0	14	0	1.09821	7	11	1	0
Impg2	0	0	0	0	1.09807	0	0	2	0
P4ha2	0	0	19	0	1.09288	39	3	10	0
Lrp11	0	0	11	0	1.09188	1	0	19	0
Fam131c	31	2	43	9	1.07373	4	3	21	0
Mup2	0	0	0	0	1.07198	0	0	0	0
Zfp445	3	2	0	0	1.07082	0	5	0	0
Creld2	7	0	86	18	1.06918	13	3	51	0
Mn1	30	0	3	1	1.06715	3	7	0	0
Hsp90aa1	0	0	7	0	1.06463	14	10	92	0
Megf8	32	0	24	30	1.0604	8	12	63	0
Tlr5	6	1	5	0	1.05834	2	0	0	0
Clu	26	22	23	5	1.05489	42	0	34	0
Necab1	2	0	2	0	1.05126	4	2	9	0
Paqr7	0	0	66	10	1.0471	62	19	118	0
Tmem120b	11	5	49	0	1.04118	26	0	129	0
Akr1c19	3	0	0	0	1.04089	6	0	3	0
Sox9	45	2	27	11	1.03156	0	3	0	0
Tmc7	2	0	4	0	1.02501	2	1	10	0
Ero1lb	30	0	0	0	1.02243	1	0	2	1
Ankrd33b	0	0	6	0	1.02169	0	2	0	0
Comt	0	0	36	25	1.01803	43	20	62	0
Agap2	15	0	5	1	1.01179	5	0	35	0
Nat1	0	0	0	0	1.00902	0	0	0	0
Hspb8	0	0	0	3	1.00538	0	0	0	0
Fam53b	1	0	4	0	1.00419	13	0	0	0
Cdhr5	4	0	27	0	0.999307	3	5	14	0
Tspyl4	10	0	0	0	0.996482	8	11	19	0
Gjb2	3	0	10	2	0.991295	0	0	18	0
Gm36028	0	0	0	0	0.990076	0	0	0	0
P2ry1	3	1	0	0	0.988563	1	0	0	0
Fam25c	14	0	13	0	0.985507	0	3	4	0
Acox1	17	3	57	10	0.985501	22	4	23	0
Saa4	1	0	0	0	0.98061	0	1	1	0
Zc2hc1c	0	0	0	0	0.980293	0	0	0	0
Chrna2	4	2	15	0	0.979116	13	0	3	0
Daglb	0	0	0	6	0.97696	22	0	104	0
H2-Aa	2	0	3	0	0.976555	0	0	0	0
Cyp8b1	14	0	4	2	0.972766	6	3	23	0
Acot1	0	3	0	0	0.972505	44	0	87	0
Cth	1	0	0	0	0.970513	2	0	1	0
Abcc3	49	0	29	21	0.969279	12	2	4	0
Hes6	13	8	1	1	0.968553	13	1	68	0
Noct	0	0	0	0	0.968292	0	0	0	0
Bag3	0	0	3	0	0.968012	15	4	0	0
Pla2g6	24	0	37	34	0.967388	25	28	57	0
Rusc1	14	0	24	16	0.963351	1	5	51	0
Zmat1	0	0	0	0	0.957864	0	0	0	0
Ddhd2	28	17	16	0	0.953926	21	2	69	0
Gna12	68	0	49	0	0.951876	12	1	18	0
Mbd1	17	2	7	10	0.949914	9	0	9	0
Lpgat1	13	5	21	0	0.947993	17	12	40	0
mt-Nd4	0	0	0	0	0.947032	0	0	0	0
Onecut1	4	0	1	0	0.945451	0	0	0	0
Plscr2	5	0	15	0	0.943834	0	0	0	0
Invs	0	11	1	0	0.942811	12	4	15	0
Hspa4l	0	0	0	0	0.940392	21	16	21	0
Rpp40	0	0	0	0	0.938046	8	5	47	0
Tlr12	3	0	12	0	0.937825	5	13	4	0
Serping1	0	3	45	11	0.937113	46	11	11	0
Plin2	0	0	34	0	0.936623	21	0	0	0
Alpl	10	4	24	0	0.933146	33	13	80	0
Gpat4	0	0	0	0	0.930937	0	0	0	0
Grina	28	0	78	20	0.930743	17	36	39	0
Mvp	0	0	26	4	0.928917	9	9	3	0
Acaa1b	3	3	1	0	0.927007	7	0	0	0
Cpsf4l	9	0	6	0	0.92418	11	0	71	0
Ttc7b	2	3	23	3	0.923903	5	8	5	0
Cpeb2	8	7	0	0	0.923891	4	10	71	0
Socs3	98	1	109	0	0.917582	9	20	24	0
Lgals8	41	0	0	0	0.916482	4	1	5	0
Enpp3	9	0	8	0	0.913639	2	0	0	0
Dpy19l1	6	7	0	5	0.909131	23	1	23	0
Slc22a4	0	0	9	0	0.908937	30	1	7	0
Tmem102	0	0	41	21	0.907318	11	2	64	0
Celsr1	12	0	15	4	0.90556	41	28	37	0
Pgap1	22	1	3	0	0.904177	28	1	0	0
Ddc	6	2	12	0	0.901897	69	9	3	0
Mtmr7	16	3	9	0	0.901182	0	1	13	0
Smpd3	12	0	6	21	0.899358	1	5	6	0
Pex11a	10	0	3	33	0.895613	31	4	89	0
Slc6a9	12	0	8	6	0.893135	12	19	36	0
Parp3	0	0	28	4	0.890875	15	1	15	0
Cyp2j5	1	1	0	0	0.889766	0	0	0	0
Cpt2	23	27	60	29	0.887354	3	5	4	0
Ido2	0	0	7	0	0.887061	1	0	5	0
Steap4	0	0	0	0	0.886018	0	0	0	0
Slco2b1	0	0	23	0	0.885259	16	5	2	0
Efemp1	4	4	6	0	0.884219	6	6	0	0
Pcsk4	31	3	46	10	0.884216	15	0	57	0
Tmem120a	32	0	26	0	0.880974	27	6	26	0
Vmo1	3	1	7	0	0.879764	3	0	0	0
Ephx1	34	0	20	2	0.874837	16	1	18	0
Alpk1	19	22	17	12	0.869756	0	2	21	0
Fmo5	2	2	7	0	0.868025	1	4	1	0
Efcab2	3	1	0	3	0.867778	0	1	23	0
Miga2	0	0	0	0	0.862733	0	0	0	0
Spryd7	0	0	0	0	0.861022	0	0	0	0
Mmp15	76	0	44	1	0.858086	10	18	30	0
Cyp2d40	2	0	1	0	0.855601	0	0	2	0
Gas2	7	0	5	1	0.854997	0	0	0	0
Ptk2b	18	1	26	0	0.850872	22	0	6	0
Slc1a2	4	0	4	10	0.847661	2	1	15	0
Praf2	0	0	50	0	0.846954	0	0	10	0
Ssc4d	0	0	0	0	0.846051	0	0	0	0
Carmil1	0	0	0	0	0.844792	0	0	0	0
Clcn2	0	0	36	0	0.842553	4	6	46	0
Id2	92	50	26	0	0.842153	22	7	10	0
Sult2a8	0	0	0	0	0.841573	0	0	0	0
Tdo2	0	0	2	0	0.840095	0	2	0	0
Mapre3	33	5	18	34	0.838916	12	6	34	0
Tsc22d1	8	0	3	0	0.837545	33	12	18	0
Scnn1a	9	0	43	4	0.835289	15	3	0	0
Enpp6	23	0	10	0	0.833615	2	0	1	0
Glyat	2	5	4	0	0.83309	1	0	5	0
Pim3	10	0	92	22	0.833069	13	4	59	0
Leng9	5	0	10	0	0.831138	6	0	7	0
H2-Eb1	3	0	4	0	0.826405	0	0	0	0
Sec22c	25	0	10	42	0.826101	53	1	69	0
Slc38a4	7	3	11	0	0.82417	9	0	24	0
Elmod3	67	2	96	0	0.823171	20	24	18	0
Ethe1	11	0	18	6	0.82283	6	2	8	0
Nos1ap	19	2	0	1	0.822427	1	1	0	0
Adcyap1r1	8	0	21	0	0.819772	8	10	2	0
Mpv17l	4	0	0	1	0.819511	3	0	0	0
Zbtb42	13	0	22	13	0.816625	8	25	28	0
Psen2	0	18	0	0	0.816368	3	3	6	0
Camk1d	0	2	17	0	0.81595	0	4	9	0
Pmm1	0	0	0	5	0.815881	22	8	81	0
Srr	0	0	44	0	0.815787	34	8	55	0
Spin1	12	27	0	0	0.815293	7	6	0	0
Hs3st6	7	0	33	1	0.813472	2	1	36	0
Cmtm4	3	1	1	0	0.809178	0	0	22	0
C8b	6	0	4	0	0.806565	1	0	0	0
Tmem79	0	1	0	27	0.80517	33	2	23	0
Atg16l2	13	0	20	0	0.804608	14	6	0	0
B2m	0	0	9	31	0.803207	9	8	83	0
Taf4b	7	0	12	13	0.803157	0	0	43	0
Plcxd2	5	0	18	0	0.802813	1	0	0	0
Gnai1	6	0	1	0	0.798141	0	0	12	0
Lamc3	0	0	10	10	0.798024	5	2	7	0
Ubc	1	5	26	0	0.797448	33	24	31	0
Calr3	0	0	0	0	0.797242	20	13	3	0
Map3k5	1	1	0	0	0.796835	7	3	9	0
Cd74	35	0	67	1	0.795169	13	10	13	0
Tsku	5	10	2	0	0.794761	4	0	0	0
Vnn1	0	0	8	1	0.794647	9	0	1	0
Kmo	0	7	1	0	0.792267	6	0	1	0
Gpcpd1	23	1	13	7	0.790131	5	0	24	0
Ccpg1os	0	0	0	0	0.790041	0	0	0	0
Amn1	81	96	31	1	0.789833	0	0	37	0
Nr1d1	0	0	15	6	0.78887	37	20	55	0
Prtn3	32	0	38	9	0.786831	8	0	14	0
Ccdc151	33	5	59	14	0.783428	4	2	16	0
Cyp27a1	5	0	3	46	0.782852	9	1	13	0
Skap2	15	19	15	26	0.777978	7	15	2	0
Fgfr1	36	25	30	0	0.777243	20	3	16	0
Il1b	4	0	5	0	0.776572	34	14	1	0
Gbp2b	0	0	0	0	0.776009	0	0	0	0
Slc41a1	0	0	11	8	0.773661	9	1	17	0
Aadat	0	2	0	0	0.770441	0	0	0	0
Hc	10	0	26	0	0.770071	10	0	25	0
Mpeg1	6	11	10	0	0.769559	1	0	24	0
Ttc39b	9	0	30	0	0.768787	0	0	6	0
Mknk2	21	2	62	14	0.768416	75	1	46	0
Atoh8	38	0	52	0	0.768137	45	0	23	0
Entpd5	1	4	5	0	0.767672	48	0	101	0
Aifm3	13	0	0	8	0.767316	4	20	17	0
Ppl	8	0	9	0	0.767175	9	21	12	0
Lap3	1	0	2	0	0.766439	7	2	8	0
Cyb5d2	4	0	1	18	0.76318	3	5	13	0
Naa80	0	0	0	0	0.762908	0	0	0	0
Aars	2	15	38	0	0.760742	25	2	25	0
Ankrd9	2	0	1	10	0.759579	15	6	95	0
Foxa1	0	0	1	0	0.758654	0	0	0	0
Onecut2	14	0	18	0	0.758341	3	0	0	0
Dmxl2	5	1	3	2	0.75818	0	0	4	0
Ak4	0	0	14	0	0.757154	5	3	19	0
Sos1	7	12	8	0	0.75682	0	3	0	0
Dbp	115	1	61	38	0.756579	31	6	37	0
Arl15	2	3	3	0	0.756508	22	0	19	0
Shtn1	0	0	0	0	0.756073	0	0	0	0
Gas7	0	5	0	0	0.755764	10	1	0	0
Adam11	7	0	3	13	0.75567	15	3	36	0
H2-Ab1	1	0	4	0	0.753599	0	0	0	0
Gde1	9	0	27	0	0.752572	1	3	16	0
Marveld3	2	0	10	0	0.752511	5	0	19	0
H2-K1	3	0	3	0	0.752358	1	0	1	0
Ugt2b37	2	2	1	0	0.751687	2	1	1	0
Tgoln1	83	2	119	0	0.748066	25	35	17	0
Mocos	0	0	0	0	0.746341	3	0	0	0
Fh1	0	7	1	0	0.745526	6	0	7	0
Prkcz	18	0	4	0	0.745233	17	0	41	0
Zfpm1	58	1	16	4	0.745096	3	1	19	0
Ifi27l2b	12	3	4	0	0.744779	0	0	17	0
Hopx	3	3	20	0	0.744008	12	1	17	0
Gm14325	4	0	3	0	0.741814	0	0	0	0
Slc7a2	13	6	12	0	0.741642	2	1	1	0
Sel1l3	13	4	0	0	0.740464	2	6	1	0
Pltp	10	0	1	13	0.740167	20	13	45	0
Hyou1	3	2	35	4	0.739879	27	0	24	0
Ubd	0	1	4	0	0.739392	1	0	0	0
Cyp2c54	0	1	1	0	0.737891	2	0	0	0
Dnaja4	1	0	1	1	0.737531	0	0	7	0
Gpr155	4	7	6	0	0.737329	3	0	0	0
P2ry2	2	1	29	0	0.736811	30	26	2	0
Zbtb20	6	7	4	0	0.736589	8	2	0	0
Acp5	36	18	69	13	0.732755	23	3	24	0
Polb	1	0	17	6	0.732017	22	2	13	4
Galnt15	0	0	0	0	0.730559	0	0	0	0
Raet1d	4	0	4	6	0.730531	15	0	2	0
Prss53	0	1	17	0	0.728541	7	0	0	0
Zfp595	0	0	0	0	0.728398	0	0	0	0
Lactb2	6	0	0	0	0.726825	2	2	60	0
Crem	0	0	0	0	0.726457	8	0	9	0
Txndc15	8	10	3	13	0.725309	8	2	25	0
Car1	13	0	0	0	0.725165	14	10	15	0
Rbm47	17	10	23	0	0.72496	3	0	1	0
A2ml1	0	0	0	0	0.722565	0	0	0	0
Zfp493	0	0	0	0	0.722293	0	0	0	0
Rexo2	15	8	45	0	0.718329	53	3	8	0
Kynu	3	0	0	0	0.716884	0	0	0	0
Dnajb2	7	0	0	48	0.714787	14	18	10	0
Usp2	0	0	1	6	0.711779	25	2	9	0
Cmah	23	10	35	0	0.710805	29	0	12	0
Ly6a	16	1	34	0	0.709706	34	0	6	0
Fyb2	0	0	0	0	0.708799	0	0	0	0
Bmp6	0	0	0	0	0.708794	3	2	0	0
Iscu	7	0	36	3	0.707723	3	1	47	0
Serpina1c	0	0	1	0	0.70571	2	0	0	0
Arl6ip1	0	0	6	0	0.702767	8	1	1	0
Phyh	6	45	3	2	0.699903	3	0	3	0
Rai2	2	0	0	0	0.698652	0	0	0	0
Slc25a22	13	3	39	0	0.698258	13	13	28	0
Rnf186	0	0	1	0	0.697081	0	2	36	0
1810024B03Rik	0	0	35	4	0.695178	2	2	2	0
Ldah	0	0	0	0	0.695152	0	0	0	0
Dop1b	0	0	0	0	0.693872	0	0	0	0
Rassf5	121	35	67	0	0.693075	8	0	54	0
Plcxd1	14	0	24	0	0.691982	0	0	8	0
Fmn1	2	1	0	0	0.690387	0	0	0	0
Wfs1	3	0	7	9	0.689799	0	0	2	0
Pogk	0	0	1	0	0.687275	0	0	46	0
Hykk	0	0	0	0	0.686838	0	0	0	0
Etnk1	3	1	4	0	0.686444	5	0	9	0
Pms1	1	0	0	0	0.686191	4	0	4	0
Uhmk1	0	0	16	0	0.682209	2	0	0	0
Ccdc157	10	0	5	15	0.682156	13	3	1	0
Uox	1	0	0	0	0.67945	0	1	0	0
Rap2a	47	15	36	0	0.678851	4	0	12	0
Habp4	7	0	8	0	0.677818	4	5	16	0
Creg1	0	0	62	0	0.677624	35	49	64	0
Acox3	13	0	28	9	0.672739	7	0	6	0
mt-Co1	0	0	0	0	0.66995	0	0	0	0
Glo1	0	1	8	2	0.669791	11	13	3	0
Fam102a	4	0	17	5	0.667247	29	19	51	0
Cbx7	12	0	0	26	0.666402	29	13	31	0
Pcsk6	2	1	2	0	0.666301	0	0	11	0
E030030I06Rik	0	0	0	0	0.662724	15	0	0	0
Zfp141	2	3	0	0	0.662097	0	0	0	0
Litaf	6	3	10	0	0.660109	68	20	110	0
Mdh1	12	2	1	0	0.660027	3	0	5	0
Guk1	0	0	30	23	0.659851	0	3	12	0
Gpt2	23	7	12	0	0.659709	9	2	45	0
Gas6	59	0	0	3	0.657885	2	6	32	0
Tmem189	86	2	50	1	0.657119	12	6	0	0
Neu2	0	2	2	0	0.655708	4	11	18	0
Pnpo	70	0	74	18	0.655162	31	11	29	0
Fam187b	5	0	16	0	0.653446	4	0	0	0
Aldh3a2	1	0	0	0	0.652807	3	9	10	0
Mug2	1	1	0	0	0.65243	0	0	0	0
Nceh1	0	0	29	0	0.652261	24	12	1	0
Ormdl3	0	1	10	7	0.651918	31	21	29	0
Pqbp1	0	0	46	0	0.651549	0	0	7	0
Sap30l	0	0	7	0	0.65056	13	0	0	0
Lman2l	0	0	24	0	0.650235	12	9	4	0
Snrnp48	0	0	0	0	0.649188	11	8	0	0
Rnd1	0	0	0	45	0.649081	9	6	45	0
Meiob	0	0	0	0	0.64788	0	0	0	0
Ntn3	4	1	16	0	0.647017	0	11	19	0
Creld1	0	0	29	0	0.646393	3	1	0	0
mt-Cytb	0	0	0	0	0.644768	0	0	0	0
Prr13	14	8	52	9	0.642658	1	8	12	0
Arel1	0	0	0	0	0.642051	0	0	0	0
Fbxo36	1	0	1	0	0.641457	0	5	6	0
Tmem250-ps	0	0	0	0	0.640529	0	0	0	0
Fam214a	0	0	0	0	0.640353	0	0	0	0
Arid5b	11	0	5	0	0.640298	2	3	7	0
Cdk18	0	0	3	44	0.640044	12	5	19	0
Enpp5	0	0	15	0	0.639998	0	0	0	0
Slco2a1	8	0	9	8	0.639975	15	2	3	0
Dpyd	2	0	0	0	0.639689	0	0	0	0
Apon	2	4	9	0	0.636781	7	0	30	0
Zfp605	13	0	1	2	0.635168	0	1	4	0
Clic5	0	0	14	0	0.633353	0	0	0	0
Dcun1d4	0	0	2	8	0.632942	4	2	26	0
Abcd1	0	0	3	0	0.631528	0	0	6	0
Zswim7	0	0	18	0	0.62951	1	5	27	0
Pcmtd1	0	0	0	0	0.628918	2	0	0	0
Zfp976	0	0	0	0	0.627662	0	0	0	0
Tmem243	0	0	0	0	0.625668	0	0	0	0
Comtd1	9	0	0	20	0.625245	0	5	0	0
Pard3b	17	3	2	6	0.625019	1	0	9	0
Paqr9	2	0	3	0	0.624894	7	4	16	0
Dusp4	1	0	2	0	0.624391	1	3	0	0
Stbd1	17	0	31	0	0.623714	5	8	24	0
Fam126b	8	7	16	0	0.623577	4	1	16	0
Rgs3	23	6	29	0	0.62242	9	5	11	0
Kctd21	26	0	1	0	0.620659	19	0	9	0
Adgra3	0	0	0	0	0.619877	0	0	0	0
Trim65	16	1	83	3	0.619618	9	3	12	0
Wwc1	22	0	0	0	0.618228	2	0	0	0
Rida	0	0	0	0	0.618157	0	0	0	0
Brap	0	2	24	0	0.617982	10	4	68	0
Hspb6	9	0	18	0	0.617659	15	5	3	0
Azgp1	4	1	0	0	0.617168	0	0	4	0
Pi4k2b	5	0	0	0	0.616512	2	8	12	0
Dym	14	1	31	0	0.615819	4	3	25	0
Tat	1	0	7	0	0.615072	1	1	5	0
Hp	0	0	0	0	0.614671	2	2	18	0
Ap3m1	18	1	0	0	0.614514	3	0	9	0
Cipc	0	0	0	0	0.61444	0	0	0	0
Slc38a3	21	1	32	20	0.613227	3	4	25	0
Cryl1	4	0	14	6	0.613139	0	0	29	0
Tcea3	35	22	42	10	0.612849	21	10	42	0
Znrf1	32	0	4	1	0.61203	13	7	5	0
Nsun2	40	6	17	4	0.611312	0	0	25	0
Dnaja1	0	0	14	0	0.611128	23	9	0	0
Jph1	0	0	0	0	0.608407	0	0	0	0
Tspan8	0	0	2	0	0.607387	0	3	0	0
Ugt3a2	1	0	0	0	0.606976	1	0	0	0
C4b	7	0	15	5	0.604437	1	1	22	0
Celf2	2	0	0	0	0.603902	0	1	0	0
Dnmbp	4	0	7	32	0.603594	0	0	6	0
Plekhg6	12	0	41	0	0.603102	13	2	0	0
Fam8a1	0	0	0	0	0.600275	0	0	0	0
C1galt1c1	0	0	23	0	0.600195	0	0	0	0
Fbxw4	0	0	0	8	0.600174	49	15	29	0
Cyb5b	17	0	3	4	0.600059	25	0	100	0
Chordc1	0	0	0	0	0.599481	0	0	0	0
Bach1	23	31	42	0	0.59832	2	0	0	0
Sgk2	2	0	3	0	0.598228	2	0	2	0
Gulp1	0	10	0	0	0.59819	0	0	0	0
Ahsa2	0	0	0	0	0.597776	4	0	30	0
Tnk2	0	0	39	0	0.597569	74	2	5	0
Irf2	40	0	23	0	0.592998	44	1	10	0
Atp9a	36	0	22	41	0.592792	2	0	5	0
Sox13	6	2	7	14	0.592438	25	4	10	0
Wdpcp	10	0	0	3	0.59239	0	0	2	0
Agtpbp1	0	0	0	0	0.591595	15	6	26	0
Cmbl	0	0	7	0	0.590403	0	1	0	0
Arhgef26	0	0	0	0	0.590309	0	0	6	0
Ppp1r3e	43	0	9	7	0.589921	3	0	45	0
Trip4	0	0	7	0	0.589736	36	10	28	0
Pdia5	52	11	7	32	0.589457	8	9	0	0
Crybg3	0	0	0	0	0.588214	1	0	0	0
Gas1	6	0	7	0	0.585931	14	4	0	0
Vkorc1l1	10	0	7	0	0.585345	26	8	0	0
Gm6733	0	0	0	8	0	1	2	1	0
D730045A05Rik	3	0	1	3	0	0	0	2	0
Hmx2	0	0	0	7	0	0	0	1	0
Higd1b	4	0	0	6	0	13	3	21	0
Gm16796	0	0	0	7	0	3	0	0	0
1600016N20Rik	4	0	43	0	0	5	2	30	0
Tm9sf3	20	0	13	6	0	0	6	0	0
Vps45	4	1	9	5	0	11	2	15	0
5S	27	4	57	25	0	62	30	104	0
Agfg1	0	0	0	0	0	6	11	41	0
Gprin1	23	0	0	18	0	0	0	20	0
Vps53	21	0	0	0	0	12	9	10	0
Crlf2	30	0	6	0	0	0	0	0	0
Tmem40	0	0	1	0	0	6	17	9	0
Cebpd	0	7	0	0	0	0	0	0	0
Olfr70	1	1	7	0	0	0	0	1	0
Cutc	9	4	9	22	0	0	0	10	0
Atp5c1	0	0	0	10	0	7	8	0	0
Gm13171	11	0	4	0	0	8	1	51	0
Arl6ip5	0	0	13	3	0	5	1	2	0
Ptar1	6	0	6	3	0	10	0	21	0
Fam150b	0	0	0	0	0	0	3	0	0
4930417G10Rik	0	0	0	0	0	3	0	39	0
Gm2245	0	0	3	0	0	0	3	0	0
Gm12903	1	0	2	0	0	0	0	22	0
Tnnc1	8	0	9	0	0	0	6	1	0
Cmtm6	2	0	9	5	0	24	27	21	0
4933424L21Rik	0	0	2	0	0	0	0	0	0
Gm13225	0	0	0	0	0	1	0	0	0
Diap3	0	0	0	0	0	0	1	3	0
Ssna1	17	0	31	17	0	7	13	33	0
Pde8a	13	2	4	0	0	8	0	33	0
Smcr7	2	2	0	0	0	1	0	15	0
Gm6252	2	0	2	0	0	2	0	0	0
4930407G08Rik	2	3	5	2	0	0	0	1	0
Gm5868	0	0	1	0	0	7	1	8	0
Gm8087	2	0	2	0	0	0	0	12	0
Zfp157	0	0	0	0	0	0	0	23	0
Gm16953	0	0	0	0	0	5	5	1	0
Itch	0	0	3	0	0	2	5	17	0
Acsf3	9	1	32	0	0	8	5	8	0
Gm10800	0	0	0	0	0	78	0	78	0
Nxf3	0	1	0	0	0	7	0	8	0
Trem2	2	0	0	0	0	16	22	0	0
Arhgap15	2	0	0	0	0	0	0	0	0
Gm7609	0	0	0	0	0	0	1	1	0
Gm16724	3	0	5	0	0	2	3	0	0
Scarna10	4	0	13	14	0	12	4	0	0
Gm8424	0	0	6	0	0	0	0	0	0
F2rl2	0	0	0	1	0	5	4	0	0
C130060K24Rik	0	0	0	0	0	0	1	1	0
Nupl1	0	0	0	0	0	10	2	2	0
Pdhb	16	5	33	0	0	62	10	29	0
Srgn	2	0	12	0	0	28	3	27	0
AU018091	0	0	0	8	0	0	0	0	0
Matk	3	0	57	27	0	18	0	68	0
Gm12736	0	0	0	0	0	1	0	8	0
Map3k4	1	0	5	0	0	20	7	51	0
Junb	43	0	1	2	0	52	10	101	0
Hnrnpd	0	0	0	7	0	5	28	5	0
Gm10241	0	1	4	0	0	0	1	29	0
Gm7973	0	0	0	0	0	3	0	3	0
Mir301b	0	0	0	0	0	1	3	1	0
Mea1	45	3	48	0	0	64	2	62	0
Gm15904	5	0	5	1	0	4	1	4	0
Tmem135	0	0	0	6	0	11	9	0	0
4930443O20Rik	0	0	0	0	0	5	2	0	0
Zfp711	0	0	0	0	0	11	0	11	0
Necab2	1	1	0	0	0	0	9	38	0
Gm17137	0	0	0	0	0	0	2	11	0
Caps2	4	0	4	0	0	1	3	2	0
Car5a	8	1	1	2	0	0	1	12	0
Rpl13	7	1	36	14	0	4	17	19	0
Gm6134	0	0	3	1	0	0	0	0	0
Enho	4	0	0	5	0	9	8	32	0
Cetn2	0	0	0	0	0	0	3	0	0
Fam188b	4	0	18	0	0	9	16	6	0
Gm15186	0	0	0	0	0	0	0	19	0
Brsk2	4	3	2	8	0	3	2	1	0
Gm11389	0	0	0	0	0	0	0	2	0
Ndufaf4	0	0	0	0	0	0	0	10	0
Nfkbie	16	2	24	3	0	5	2	50	0
Psg23	0	0	5	0	0	0	0	0	0
Gm12882	0	0	0	1	0	5	1	19	0
Sin3b	0	0	0	0	0	9	8	2	0
6720416L17Rik	1	0	0	23	0	0	1	3	0
4930547M16Rik	0	0	1	0	0	2	0	0	0
Ankrd17	0	5	0	0	0	5	0	0	0
Gm5544	0	0	1	0	0	0	1	1	0
Gm12317	1	1	1	0	0	0	0	0	0
Gm14398	0	0	0	11	0	0	0	2	0
Pip5k1a	33	5	32	0	0	2	1	3	0
Rbm4b	12	1	10	3	0	2	0	39	0
Zc3h12d	3	1	32	0	0	5	1	18	0
Vault	1	0	0	2	0	0	4	15	0
SNORD20	0	0	0	0	0	3	6	1	0
Itgb5	0	0	31	0	0	24	52	28	0
Xkr8	4	0	28	0	0	12	1	6	0
Gm14884	0	0	5	0	0	0	0	0	0
Gm16217	0	0	5	1	0	0	0	5	0
Gm8738	5	2	1	22	0	0	0	8	0
Edc3	2	0	17	31	0	18	8	52	0
Snord92	0	0	0	0	0	0	0	1	0
Rspo4	0	0	0	1	0	0	2	1	0
Elfn2	0	0	9	11	0	18	13	26	0
Aggf1	1	0	0	0	0	1	7	3	0
4930483K19Rik	2	3	2	0	0	1	0	0	0
A730011C13Rik	11	4	9	0	0	0	1	0	0
Ggnbp1	3	0	6	34	0	56	0	28	0
Dusp15	11	0	10	5	0	14	19	16	0
Vat1l	8	0	4	0	0	0	1	0	0
4921504E06Rik	0	0	2	0	0	0	0	0	0
Gm11548	0	0	0	0	0	1	0	1	0
Prcc	0	1	6	56	0	24	10	51	0
Gm12591	1	0	0	0	0	0	0	0	0
6230409E13Rik	0	0	0	4	0	0	1	15	0
Spdyb	0	0	2	1	0	0	0	23	0
Ugt1a9	0	3	2	0	0	41	7	2	0
Fam38b	0	0	0	0	0	0	0	2	0
S100a16	16	0	12	0	0	8	12	8	0
Pxn	5	0	7	3	0	1	11	78	0
Gm12918	0	0	2	0	0	6	12	21	0
Arpc4	0	0	23	2	0	6	2	0	0
Olfr235	0	0	0	0	0	0	0	1	0
Defb30	1	0	0	0	0	0	0	0	0
Zfp691	0	0	0	2	0	37	50	39	0
Grrp1	0	0	20	19	0	31	9	53	0
Gm10063	0	1	1	0	0	2	0	6	0
Phf5a	0	0	0	4	0	18	9	69	0
Mir382	1	1	0	0	0	0	1	0	0
Gm15961	0	0	0	0	0	1	1	3	0
Ftcd	2	4	2	0	0	1	0	0	0
Gm15344	0	0	0	0	0	3	3	0	0
Gm3510	4	0	0	4	0	0	0	0	0
AL807811.1	0	0	1	0	0	0	0	9	0
Gm12315	2	0	2	0	0	0	0	1	0
Adam32	2	0	13	0	0	2	1	0	0
Ces2e	6	4	0	0	0	0	0	1	0
Als2	19	3	0	0	0	22	5	0	0
Prrc2a	1	0	29	4	0	10	4	63	0
Gm6970	0	0	13	3	0	13	20	24	0
Lrrc24	1	0	9	5	0	12	31	50	0
BC048355	34	3	34	0	0	50	3	47	0
Kcnc3	0	0	2	7	0	13	3	10	0
Gm11885	0	0	0	0	0	0	0	7	0
Actl6a	0	0	0	0	0	5	1	39	0
Frg1	0	0	1	0	0	3	0	0	0
U90926	2	0	4	0	0	0	0	0	0
Ikzf5	2	2	0	9	0	1	0	1	0
Gm830	3	0	2	0	0	0	0	0	0
Serpina3i	0	0	0	1	0	4	0	1	0
Tjp2	0	0	4	17	0	54	3	23	0
Gm13632	0	0	0	0	0	0	1	2	0
Gm13162	0	0	0	0	0	5	0	2	0
Chmp7	1	0	0	0	0	0	13	1	0
Gm525	0	0	0	0	0	2	1	2	0
Orai1	19	6	51	0	0	27	0	125	0
Mtif3	5	0	15	0	0	29	0	1	0
Krt7	18	0	0	6	0	1	0	17	0
Gm13506	0	0	0	0	0	0	0	1	0
Acer1	0	0	1	2	0	3	3	31	0
Gm15742	1	0	1	0	0	1	0	0	0
Cd99l2	0	0	0	0	0	0	0	18	0
Gm16341	0	0	3	0	0	1	1	0	0
Plbd2	12	0	25	18	0	8	0	20	0
Rbm6	25	2	29	20	0	4	18	25	0
Aqp2	0	0	9	14	0	7	10	19	0
Gm15707	0	0	20	0	0	10	9	0	0
1700091E21Rik	7	0	7	0	0	0	0	0	0
Gm16193	0	0	1	0	0	0	0	0	0
E230001N04Rik	0	1	3	1	0	46	7	22	0
Cdx4	1	0	0	0	0	0	0	0	0
Olfr1033	1	0	3	0	0	0	0	0	0
Zfp426	12	3	1	6	0	12	0	3	0
Rbpms2	0	0	0	0	0	22	14	18	0
Gm11741	15	2	58	13	0	19	3	34	0
Inf2	16	0	24	6	0	9	25	22	0
Osbp2	4	0	0	18	0	9	1	6	0
Gm10941	0	0	4	21	0	9	0	3	0
SCARNA15	5	1	5	0	0	3	4	3	0
Gm10283	0	2	0	0	0	0	0	0	0
Mir433	0	0	0	2	0	0	0	1	0
Tmem203	11	0	26	14	0	6	9	27	0
Sav1	0	0	9	0	0	31	5	62	0
Snx27	4	1	0	0	0	2	0	0	0
Fam107b	8	0	0	0	0	30	20	59	0
Tor2a	21	0	14	0	0	16	18	11	0
Capza2	14	9	6	0	0	2	6	0	0
Dolpp1	29	3	34	0	0	23	15	38	0
Cacng8	1	0	1	20	0	3	0	9	0
Nfyc	0	0	0	15	0	13	10	57	0
Nos2	0	0	18	4	0	20	1	4	0
Rnf112	1	0	0	0	0	1	3	3	0
Gm17670	11	0	1	0	0	20	1	4	0
Crat	27	3	33	0	0	20	10	65	0
Fam193a	0	0	21	2	0	0	2	82	0
Srp54c	0	3	13	0	0	14	5	28	0
Taf4a	0	0	0	5	0	0	5	18	0
Gm14828	0	0	0	0	0	1	0	0	0
9330104G04Rik	1	0	2	2	0	6	2	19	0
Gm13816	0	0	2	0	0	0	0	2	0
Itgae	0	0	0	15	0	10	2	4	0
Hmg20b	3	0	72	21	0	40	0	79	0
Gm12997	0	0	0	0	0	2	0	2	0
Zfp964	0	0	0	7	0	0	0	21	0
Gm15375	0	0	0	0	0	18	4	2	0
Numa1	0	0	13	0	0	5	1	6	0
Ocrl	0	0	4	0	0	0	0	4	0
Cox15	6	3	7	16	0	0	0	9	0
9030622O22Rik	0	0	0	0	0	5	0	0	0
Ift81	89	5	34	0	0	17	0	103	0
Lrrc55	0	0	0	1	0	8	1	1	0
Gm2991	0	0	0	0	0	0	0	1	0
Myom3	2	0	16	7	0	4	11	4	0
Trim17	0	0	13	9	0	1	3	0	0
Prss16	0	0	2	39	0	14	10	10	0
4930505M18Rik	0	0	0	0	0	3	0	3	0
Nup50	13	0	20	3	0	5	11	12	0
Tssc1	3	0	0	0	0	13	0	0	0
Usp38	0	0	0	0	0	4	4	3	0
Thrb	0	0	0	0	0	5	0	0	0
Eme2	27	5	45	1	0	2	1	38	0
Tmem156	1	0	24	0	0	2	7	20	0
Cldn20	12	3	10	6	0	7	0	4	0
Wdfy1	5	0	0	4	0	0	0	0	0
Ints3	14	0	11	0	0	13	16	8	0
Gm5870	0	0	3	0	0	0	0	0	0
Gm17461	1	0	0	0	0	3	0	0	0
Ifi44	0	0	0	0	0	0	0	3	0
Pomt1	0	1	30	4	0	38	22	64	0
Mir3095	0	0	0	0	0	0	0	1	0
Fam100a	10	0	13	0	0	27	40	41	0
Gm15872	0	0	5	0	0	2	0	0	0
Cct8l1	0	0	0	0	0	0	1	0	0
Gm15247	0	0	8	0	0	12	1	1	0
Sart1	2	0	3	10	0	2	2	17	0
Gpr20	1	0	0	0	0	0	1	7	0
Spata7	6	0	8	19	0	0	1	28	0
Ric3	0	0	0	26	0	7	0	26	0
Irx1	9	0	0	16	0	0	0	0	0
Atg4b	9	0	49	0	0	0	5	4	0
Itga3	11	0	17	32	0	14	3	2	0
Gm15736	0	0	1	0	0	0	0	1	0
Prpf4b	0	0	0	0	0	4	0	0	0
Trbj2	0	0	0	0	0	0	0	3	0
Nmi	0	0	0	0	0	3	0	15	0
Gm13788	0	0	0	0	0	0	1	0	0
Rassf7	11	1	45	0	0	5	4	34	0
Gm11345	4	2	5	0	0	1	0	1	0
Brf1	6	4	21	13	0	6	10	44	0
Mylk3	13	3	1	0	0	6	0	16	0
Dyx1c1	0	0	0	0	0	24	7	12	0
Kcng2	0	0	7	2	0	0	0	26	0
Gm13537	8	0	7	4	0	10	11	11	0
Bahd1	8	3	16	30	0	65	8	21	0
Wars	2	0	0	2	0	24	10	48	0
Atg14	9	0	19	0	0	38	14	36	0
D830039M14Rik	0	0	7	0	0	3	2	12	0
Jmjd6	0	3	1	21	0	15	3	23	0
D7Ertd443e	1	2	0	0	0	0	0	1	0
Bai1	4	0	3	4	0	0	0	9	0
Gm13147	0	0	0	0	0	25	0	6	0
Rnf213	6	0	33	6	0	15	19	8	0
E230016M11Rik	0	0	0	0	0	12	8	15	0
Gm13121	0	0	1	0	0	0	0	0	0
BC002230	0	2	1	10	0	1	13	30	0
Sec14l5	9	0	1	0	0	2	8	6	0
Vamp4	0	0	8	0	0	21	15	5	0
Gm12758	0	0	0	0	0	0	0	4	0
Eif4e	10	5	6	0	0	1	5	9	0
Ccz1	2	2	0	0	0	4	1	94	0
Ep300	0	0	0	0	0	2	5	10	0
Eml5	10	0	7	11	0	13	3	20	0
Gm13246	4	0	0	0	0	3	2	4	0
Upk1b	0	0	0	0	0	3	0	0	0
Gm11627	15	0	23	2	0	5	3	26	0
Olfr1370	0	0	0	0	0	0	2	0	0
Gpr125	1	7	0	0	0	0	0	0	0
Sbds	7	0	4	0	0	28	8	0	0
Zfyve19	5	2	1	18	0	83	19	8	0
Ganab	12	0	12	0	0	17	2	2	0
Casc1	1	0	11	0	0	17	13	0	0
Gm15857	0	0	3	0	0	0	0	2	0
Gm13093	4	0	5	0	0	1	0	1	0
Gm10566	0	0	0	0	0	0	0	5	0
Rpl39l	0	0	9	0	0	0	0	0	0
Gm10420	0	0	24	15	0	0	0	18	0
Gm128	13	6	30	0	0	3	0	3	0
Gm12832	0	0	0	0	0	1	1	1	0
Degs1	2	2	24	0	0	22	12	43	0
AI848100	0	0	14	0	0	19	15	0	0
Gm15937	0	0	0	8	0	0	0	12	0
Gm15154	0	0	5	0	0	1	0	0	0
Nudt5	0	2	13	0	0	2	4	1	0
Fnbp1	0	0	29	0	0	15	0	18	0
A430108G06Rik	0	0	0	0	0	1	0	2	0
Lpin2	1	0	6	0	0	36	7	10	0
Gm17315	0	0	1	0	0	0	0	0	0
Gm10232	0	0	0	5	0	3	2	27	0
Fign	1	1	0	0	0	0	3	0	0
Gm12110	0	0	0	0	0	1	0	0	0
Gm11614	0	0	1	14	0	1	4	11	0
Tns4	0	0	13	0	0	20	12	24	0
Noto	0	0	0	0	0	3	0	0	0
Defb37	1	0	0	0	0	0	1	0	0
Nras	0	0	0	0	0	0	1	0	0
Wbp5	0	5	0	0	0	10	0	6	0
Lyz1	5	0	11	0	0	11	3	26	0
4930524B15Rik	0	0	0	0	0	0	0	1	0
Mcoln2	0	0	0	0	0	0	6	15	0
Zfp111	5	0	13	0	0	16	2	0	0
Pnp2	1	0	2	0	0	1	0	0	0
Fut2	84	1	30	23	0	16	3	18	0
Ccdc110	0	0	0	0	0	1	10	1	0
Trim15	0	0	9	0	0	1	0	0	0
Gm16875	0	0	0	0	0	0	0	1	0
Gm10506	0	0	2	0	0	0	0	5	0
1700055C04Rik	2	0	4	0	0	0	1	0	0
Kctd19	0	0	0	0	0	4	4	15	0
Fbxo4	5	1	3	0	0	1	0	0	0
Gm17041	0	0	0	2	0	2	0	5	0
Podn	19	25	39	10	0	12	4	7	0
Gspt1	7	4	7	0	0	42	7	96	0
Gm10132	0	0	0	0	0	0	0	16	0
Rhot2	5	5	0	8	0	18	7	33	0
Tmem39a	0	0	1	0	0	5	0	0	0
Crtc1	6	0	91	63	0	17	4	27	0
Gm17250	0	0	0	0	0	2	1	2	0
Gm8731	26	0	54	0	0	6	8	11	0
Gm11447	0	0	2	3	0	14	0	1	0
Lrrc8a	31	3	37	0	0	9	5	39	0
Blcap	0	1	2	0	0	17	15	31	0
Tmem69	2	0	0	0	0	2	3	1	0
Nmd3	0	2	4	0	0	2	2	3	0
Spatc1	21	0	38	9	0	2	5	14	0
Bpifb2	0	0	0	0	0	2	0	1	0
Gm5353	17	0	0	0	0	0	0	0	0
Tlr3	10	0	3	0	0	4	0	0	0
Lingo4	4	0	0	0	0	2	0	0	0
Meox2	0	0	0	10	0	0	0	0	0
Ypel1	2	0	0	1	0	1	41	48	0
Rps6kl1	13	9	12	0	0	3	0	38	0
Gm17218	0	0	0	0	0	9	1	2	0
Gm12464	1	1	0	0	0	2	1	2	0
Hist1h1t	16	0	1	0	0	4	0	2	0
Capns2	0	0	6	0	0	5	0	0	0
AC167132.1	0	0	0	0	0	1	0	0	0
Serpina10	8	3	4	0	0	2	0	6	0
Mir702	0	0	12	1	0	1	1	2	0
Gm17408	1	0	0	0	0	0	0	9	0
Baalc	1	1	0	0	0	0	1	3	0
Gm9085	0	0	1	0	0	0	0	2	0
Olfr1027	0	0	1	0	0	0	0	0	0
Hps5	1	0	0	0	0	9	4	14	0
Gm14052	0	0	13	0	0	0	1	0	0
Gm17614	1	0	1	0	0	0	0	0	0
Synj2bp	13	1	0	17	0	3	0	18	0
Tfg	0	2	0	0	0	0	0	1	0
Vmn1r198	0	0	0	1	0	0	0	0	0
Tcte2	31	0	0	0	0	22	0	46	0
Rad51l1	1	0	0	0	0	3	5	0	0
Dpf1	51	4	36	15	0	19	17	34	0
Pex13	0	0	0	0	0	5	1	20	0
Orai3	0	0	22	0	0	14	0	0	0
Git2	9	0	8	9	0	9	3	73	0
4930599N23Rik	0	0	0	0	0	0	1	9	0
Serpinb9	14	0	0	0	0	22	3	14	0
Ssr4	0	0	4	0	0	0	0	0	0
Keap1	29	2	25	16	0	19	15	34	0
Gsc2	0	0	0	2	0	4	4	32	0
Pou4f2	0	0	0	1	0	0	0	0	0
5430405G05Rik	0	0	0	2	0	2	4	9	0
Nek4	5	1	10	0	0	7	13	1	0
Yif1b	56	5	51	16	0	26	18	38	0
Six1	11	0	3	33	0	3	1	4	0
4930467E23Rik	0	0	0	0	0	0	2	0	0
Gm5564	0	0	0	0	0	0	0	8	0
Cml5	11	3	5	0	0	0	1	0	0
Tubal3	4	0	1	0	0	20	0	1	0
Nmb	18	1	76	0	0	13	4	37	0
Htt	0	0	7	0	0	0	3	48	0
Mfsd7b	0	0	3	7	0	4	2	32	0
Gm17336	0	0	0	0	0	0	0	3	0
4732463B04Rik	0	2	0	0	0	12	0	15	0
Rab39	2	0	0	0	0	0	0	2	0
1700028J19Rik	0	0	0	0	0	1	0	0	0
Rtn4ip1	0	1	2	0	0	9	0	0	0
Mir32	1	0	0	0	0	0	0	0	0
Rps7	7	0	0	0	0	25	0	0	0
AC132957.1	0	0	5	5	0	0	0	0	0
Gm15594	0	0	0	0	0	0	0	3	0
Pdlim1	21	5	10	0	0	3	3	0	0
Kazald1	0	0	27	46	0	6	1	7	0
Serac1	0	0	29	0	0	41	19	5	0
Gm4779	0	0	0	0	0	0	0	1	0
Gm2061	0	0	0	0	0	1	3	15	0
Gm11591	0	0	0	0	0	0	2	0	0
Gm3470	1	0	0	2	0	2	0	1	0
Gdap1l1	8	6	9	4	0	6	0	0	0
Bbs9	6	19	11	1	0	25	0	17	0
Ccbl2	0	0	2	0	0	5	1	0	0
Gm10036	0	0	0	0	0	0	1	0	0
Dcp1b	0	3	0	8	0	12	16	14	0
Prkrir	1	3	0	3	0	7	5	5	0
2410137F16Rik	0	0	0	2	0	0	0	0	0
Adamts15	2	0	4	4	0	4	2	47	0
1700025C18Rik	0	0	0	3	0	0	4	1	0
Mup6	0	0	0	0	0	2	4	0	0
Fam40a	19	0	0	15	0	8	0	24	0
Gla	0	0	8	0	0	1	0	0	0
Dus2l	15	0	32	23	0	7	9	64	0
Mut	0	0	0	0	0	1	1	0	0
Pstpip2	0	0	0	9	0	9	0	21	0
Gm11227	2	0	2	0	0	0	0	0	0
Tbx1	0	0	18	22	0	8	1	30	0
Rer1	26	1	2	0	0	48	0	53	0
Tas1r3	1	0	4	0	0	0	16	2	0
Grip1	0	0	0	0	0	0	3	14	0
4930405O22Rik	0	0	0	0	0	1	0	0	0
Rad1	0	11	0	0	0	30	15	36	0
Acadvl	0	2	52	23	0	16	3	83	0
Gm20432	0	0	0	0	0	3	1	0	0
Gm20443	9	0	3	13	0	0	0	0	0
Got2	7	0	10	0	0	11	7	38	0
Ddx5	0	0	40	0	0	79	3	43	0
Ttc5	1	0	4	0	0	3	0	0	0
Zfp616	0	0	0	0	0	0	5	0	0
Ddx58	3	3	3	0	0	0	0	0	0
Polr2g	12	0	19	0	0	11	2	2	0
Sf3b1	7	1	9	0	0	22	0	4	0
2410017I17Rik	0	0	4	3	0	0	1	8	0
S100a3	12	0	7	0	0	2	8	4	0
B230378P21Rik	0	0	0	3	0	2	0	0	0
Gm16011	0	0	0	0	0	3	0	0	0
Tnfrsf23	0	0	0	0	0	8	0	5	0
Gm13609	1	0	3	1	0	7	6	7	0
Klhl9	2	0	0	2	0	0	4	11	0
4930426I24Rik	2	0	20	0	0	5	4	28	0
Helb	0	0	0	0	0	10	9	4	0
Hhatl	10	0	4	18	0	13	1	33	0
Gm9432	0	0	0	0	0	1	0	0	0
Stambp	0	0	0	17	0	21	20	23	0
Lsm14b	0	0	0	6	0	0	3	25	0
Traj60	1	0	0	0	0	0	2	0	0
Gm13584	0	0	1	5	0	0	2	0	0
Pcdhb21	0	0	0	7	0	1	0	1	0
Sfswap	3	0	2	0	0	1	4	5	0
Gm8730	0	0	0	8	0	0	0	0	0
Fam124b	4	0	0	4	0	1	0	0	0
Cdo1	0	0	21	0	0	7	0	2	0
Gm14892	0	0	0	0	0	1	0	1	0
Acvr1	0	0	0	0	0	6	0	33	0
D11Bhm181e	0	0	0	3	0	3	0	2	0
Ush2a	0	0	0	0	0	1	0	0	0
Gcnt1	0	1	0	0	0	29	1	26	0
Ppapdc2	0	0	10	5	0	1	1	10	0
Prickle3	0	0	45	0	0	0	0	1	0
Dhrs11	7	0	1	23	0	4	1	0	0
Atp5j	0	0	2	0	0	3	0	1	0
Gm17626	0	0	0	2	0	6	0	1	0
Olfr334	0	0	0	1	0	1	0	1	0
Gm5514	0	0	0	0	0	8	0	18	0
Ifna13	0	0	0	0	0	0	0	2	0
Nme4	1	4	0	3	0	21	5	47	0
AC132380.1	0	0	0	0	0	1	1	1	0
Gm12512	0	0	0	0	0	0	0	4	0
Uxt	0	0	44	0	0	0	0	0	0
Neat1	0	0	5	6	0	7	4	2	0
S100a7a	6	0	4	0	0	3	4	2	0
Psmd6	0	0	0	0	0	0	0	19	0
Adm2	13	7	12	11	0	0	1	13	0
Nfia	0	0	17	0	0	22	1	17	0
Gm4969	0	0	4	1	0	4	4	16	0
Dao	5	0	5	0	0	3	2	22	0
Snord58b	5	1	6	0	0	0	0	9	0
Zfp879	0	0	0	7	0	6	8	12	0
Acsl6	0	0	0	0	0	18	1	5	0
Hmgn1	0	0	5	0	0	21	0	58	0
Anp32e	1	2	26	3	0	29	1	15	0
Gm12105	1	0	1	3	0	0	0	5	0
Nctc1	0	0	2	5	0	0	3	2	0
C230035I16Rik	0	0	0	0	0	0	1	0	0
5830472F04Rik	0	0	0	0	0	8	2	11	0
Ccdc122	9	0	2	0	0	8	0	21	0
Gm13025	0	0	0	0	0	3	0	15	0
Gm4879	0	0	2	0	0	1	2	10	0
Mir181d	1	0	0	0	0	0	0	0	0
Lgals3bp	21	7	26	3	0	0	11	0	0
Gm1043	0	0	0	8	0	0	0	4	0
Gm12443	0	0	2	0	0	0	2	3	0
Tmem87a	0	0	0	0	0	6	2	10	0
Ptprz1	0	0	0	2	0	5	5	5	0
Gm15849	0	0	1	3	0	1	0	0	0
Wdr92	0	0	3	0	0	5	0	10	0
Nprl3	0	0	0	0	0	1	6	23	0
Tm4sf19	0	0	27	0	0	10	0	1	0
Slc39a8	0	1	2	0	0	4	6	0	0
Per1	0	0	5	13	0	21	24	0	0
Plekhf2	0	0	5	0	0	20	27	78	0
1700008I05Rik	0	1	0	0	0	1	0	1	0
Magea7	0	0	0	0	0	1	0	1	0
Cc2d1b	0	1	1	0	0	34	12	51	0
Pigf	0	0	2	2	0	14	9	7	0
Ucn	0	0	5	3	0	2	7	19	0
Prtg	0	0	0	0	0	11	7	2	0
Olfr172	0	0	0	0	0	0	0	2	0
Gm15840	0	0	0	0	0	0	0	2	0
Sqrdl	0	0	0	12	0	0	0	7	0
AC160992.1	0	0	0	0	0	1	0	0	0
Gm20495	0	1	5	5	0	2	0	14	0
Fgf13	0	0	0	0	0	0	0	3	0
Peli2	8	0	2	0	0	18	5	0	0
Tex15	0	0	0	0	0	15	0	18	0
Hoxc8	0	0	14	10	0	7	13	7	0
Gpr152	10	0	6	0	0	1	2	19	0
Siva1	16	0	21	9	0	8	24	37	0
Rnf133	1	0	0	0	0	0	0	0	0
Exog	7	2	1	0	0	6	0	2	0
Fxr1	1	0	0	0	0	2	0	14	0
1700001K19Rik	0	0	2	0	0	4	3	40	0
Vmn2r55	0	0	1	0	0	0	0	1	0
Gm12966	1	0	34	13	0	2	0	12	0
Gm10384	28	12	13	0	0	10	2	21	0
Gm5468	1	1	1	0	0	5	0	0	0
Cul7	44	3	46	0	0	61	3	59	0
1700120O09Rik	0	0	0	4	0	0	0	0	0
2510046G10Rik	0	0	10	5	0	5	0	4	0
Pcdha3	0	0	0	1	0	0	0	2	0
a	0	0	0	6	0	0	0	20	0
Gm14101	1	0	1	4	0	0	0	4	0
Ccdc142	0	0	0	6	0	14	6	45	0
Tnfrsf1a	14	0	63	8	0	25	4	0	0
Cd151	12	3	38	1	0	11	9	26	0
4933413G19Rik	2	0	4	6	0	3	3	29	0
Hars2	3	0	2	3	0	0	5	36	0
Nsfl1c	0	0	0	0	0	1	2	4	0
Gm17422	0	0	4	0	0	0	0	1	0
Cox18	0	0	0	0	0	4	0	4	0
Cd8b1	0	0	3	0	0	10	3	11	0
Ccdc97	5	0	16	6	0	28	9	2	0
Gp5	0	0	8	0	0	64	32	32	0
Grm2	0	0	7	4	0	1	0	1	0
Aff1	0	0	1	0	0	26	4	1	0
AY074887	5	0	2	6	0	1	2	10	0
Mdm2	30	0	10	0	0	6	7	4	0
Oprl1	0	0	2	2	0	18	0	0	0
Gm12998	1	0	0	0	0	0	0	2	0
Blvrb	11	0	54	18	0	15	9	36	0
Olfr1444	0	13	13	0	0	0	0	0	0
Fastkd5	5	0	0	12	0	3	1	7	0
Klk1b5	0	0	0	0	0	3	0	1	0
Olfr1387	0	0	1	0	0	0	0	0	0
SNORD27	0	0	1	0	0	2	0	0	0
Abi1	0	2	0	38	0	4	0	3	0
Ippk	18	4	15	9	0	21	26	6	0
Gm11399	0	0	0	0	0	93	4	30	0
Trbj1	0	0	0	0	0	0	0	3	0
Gm15856	0	0	5	0	0	6	0	0	0
Eml4	9	0	9	3	0	0	3	5	0
Gm13590	0	0	1	0	0	1	0	0	0
Gm15879	1	0	1	0	0	6	3	3	0
Ppm1m	4	0	25	0	0	24	0	7	0
Gm16152	0	0	0	2	0	2	1	3	0
Drap1	0	0	5	16	0	2	2	23	0
Lcn12	5	0	1	0	0	4	0	6	0
Gm13302	1	0	0	1	0	2	3	2	0
2610021K21Rik	0	0	1	5	0	0	3	10	0
Bmp1	12	0	21	47	0	20	21	21	0
Gm13835	5	48	27	0	0	17	1	8	0
Gyk	3	0	0	0	0	2	0	13	0
Skp1a	0	2	0	0	0	43	18	53	0
Gm12036	0	0	4	0	0	1	0	9	0
Gm17587	0	0	7	0	0	0	0	1	0
Spnb3	9	1	8	5	0	2	0	32	0
Ccdc74a	8	0	0	2	0	7	21	28	0
Gm12952	0	0	0	1	0	8	1	2	0
Ell	14	0	99	48	0	19	4	22	0
Zfp60	2	0	16	3	0	7	1	15	0
Cecr5	3	0	4	0	0	5	6	1	0
4930404H24Rik	0	0	0	0	0	9	3	44	0
Glp1r	0	1	0	2	0	1	0	2	0
Gm12293	0	0	0	0	0	0	0	5	0
Mir3077	0	0	0	0	0	1	2	2	0
Gm12944	0	0	0	3	0	0	1	7	0
Apitd1	0	0	0	3	0	3	6	7	0
Gm15527	0	0	0	0	0	4	4	0	0
Fam108a	22	3	42	14	0	75	1	44	0
Gm11457	6	0	1	0	0	13	5	18	0
Pcbp1	0	0	7	0	0	56	6	60	0
Ankhd1	2	0	2	5	0	0	15	48	0
Klrc3	0	0	1	0	0	0	0	0	0
Ybx2	0	0	42	21	0	15	3	47	0
Gm15787	4	0	10	2	0	0	1	5	0
Pex14	2	0	2	11	0	8	14	23	0
Fbxl19	0	1	20	0	0	16	0	0	0
Gm16008	0	0	2	0	0	0	6	4	0
Slc24a5	0	0	0	0	0	5	17	1	0
Olfr411	0	0	0	0	0	0	1	1	0
Prss2	0	0	0	0	0	0	0	5	0
Wnt7a	10	5	2	6	0	3	2	0	0
A930019D19Rik	0	0	0	0	0	1	3	0	0
Gm6471	0	0	0	4	0	1	0	0	0
Pnliprp2	0	0	0	2	0	0	0	0	0
Pde4d	0	0	0	0	0	12	8	7	0
Cr1l	1	0	10	0	0	5	0	1	0
Gm12941	0	0	0	4	0	1	1	9	0
Eif3b	21	0	12	0	0	33	14	47	0
4933415D12Rik	0	0	0	0	0	0	3	0	0
Ptprc	0	1	3	0	0	19	0	1	0
Cdk2ap2	43	1	32	0	0	2	5	61	0
Tbc1d19	0	0	1	0	0	9	2	19	0
Fabp3	29	0	11	11	0	10	12	31	0
BC023719	2	0	4	5	0	1	0	2	0
Kcnb1	4	5	4	4	0	2	0	1	0
1700019G24Rik	0	0	2	0	0	0	0	0	0
Apol7c	8	1	8	0	0	0	0	0	0
Ass1	0	1	12	12	0	31	7	6	0
Gm15979	6	0	1	10	0	0	2	1	0
Gm17248	1	0	0	0	0	0	0	0	0
Fam100b	12	4	74	19	0	27	6	54	0
Tmem188	25	0	47	37	0	7	1	100	0
Pcdh10	0	0	0	10	0	0	0	0	0
Arid1a	2	0	15	12	0	44	4	83	0
Ccdc117	0	0	43	3	0	16	23	11	0
Fa2h	4	0	3	0	0	2	2	7	0
A130050O07Rik	0	1	1	0	0	2	0	0	0
Trim16	0	2	5	0	0	5	10	11	0
Twf1	0	0	0	0	0	1	1	39	0
Gm11617	0	0	1	0	0	1	0	1	0
Gm12989	6	0	30	13	0	8	10	8	0
Dennd1a	3	0	7	33	0	6	12	5	0
Slc17a6	0	0	0	9	0	0	0	0	0
Dgkg	5	0	0	0	0	4	2	0	0
Klraq1	0	0	26	0	0	22	9	4	0
Zbtb12	0	0	12	3	0	5	1	62	0
1500009L16Rik	4	1	0	0	0	17	0	5	0
Myo10	17	2	24	0	0	23	1	14	0
Gm14037	0	0	2	0	0	0	15	0	0
Ppargc1a	0	0	0	0	0	19	7	0	0
Gm13362	0	0	0	0	0	0	2	1	0
Serpinb6b	9	0	0	0	0	21	3	9	0
Gm14007	4	0	3	0	0	0	0	0	0
Gm14229	0	0	0	0	0	0	1	0	0
A930003A15Rik	0	0	0	0	0	0	0	5	0
Gm17484	11	6	5	0	0	6	2	22	0
Rpl23a	22	3	32	7	0	56	6	74	0
Snora3	0	0	2	1	0	2	0	3	0
Tm2d3	1	0	1	0	0	5	0	12	0
Mpp4	3	1	0	0	0	6	1	0	0
Wdr73	12	0	55	0	0	13	2	26	0
Trpc6	0	0	0	0	0	0	0	1	0
Glra4	0	0	0	0	0	0	0	3	0
Gprc5a	0	0	0	0	0	17	8	0	0
Zfp167	1	2	0	0	0	1	2	0	0
Malt1	0	0	2	0	0	21	9	16	0
Ubqln4	23	5	25	19	0	35	4	18	0
Hist1h4b	20	0	2	0	0	8	3	8	0
BC005624	0	0	29	2	0	25	14	52	0
Gm13060	0	0	14	16	0	31	6	53	0
Gm5319	2	0	2	0	0	2	0	1	0
Ccl7	4	4	2	0	0	0	0	0	0
Hspa9	0	1	7	2	0	32	12	7	0
Gm11271	2	3	8	0	0	3	0	4	0
Slc34a1	1	1	0	0	0	3	19	12	0
Th	0	0	0	4	0	2	0	4	0
H1f0	5	0	12	19	0	30	19	61	0
Mir100	0	0	2	0	0	0	0	0	0
Tpbg	4	1	4	0	0	0	0	8	0
Zcchc18	0	0	0	0	0	0	0	2	0
Gm10343	2	0	7	0	0	55	25	60	0
2310003F16Rik	0	0	19	4	0	1	1	17	0
Tmem11	4	2	0	0	0	3	1	17	0
Nlrc4	0	0	0	0	0	2	0	15	0
Afmid	81	0	88	0	0	11	17	37	0
AU022754	3	0	15	7	0	0	4	2	0
Gm17504	1	1	1	0	0	4	0	8	0
Hist1h3g	6	0	0	0	0	0	0	4	0
Slc35b1	4	0	6	35	0	15	12	15	0
Mrpl20	6	0	8	0	0	3	11	20	0
Epx	0	0	12	2	0	0	0	16	0
Gm11282	0	0	3	26	0	16	14	17	0
Gm6893	1	0	2	0	0	0	0	0	0
4932702P03Rik	0	0	1	0	0	1	0	10	0
Gm11053	0	0	0	1	0	0	0	0	0
Gm13433	8	0	3	10	0	2	3	13	0
Tmem81	0	0	13	35	0	1	2	3	0
Gm13566	1	0	0	0	0	0	0	1	0
Gm13241	0	0	0	0	0	5	3	0	1
Vmn1r1	0	0	0	0	0	0	0	4	0
Ccdc112	0	0	4	0	0	4	2	5	0
Gm3776	0	1	0	0	0	0	0	0	0
4732490B19Rik	7	1	3	0	0	0	0	0	0
Gm13532	0	0	0	0	0	0	2	0	0
Ube2d1	6	2	1	0	0	1	0	5	0
AL671993.1	2	0	0	0	0	0	0	0	0
Ruvbl1	0	0	5	26	0	44	32	2	0
Eif5b	2	2	0	0	0	13	0	22	0
Irf2bp1	0	0	7	2	0	30	7	16	0
Prosc	2	4	0	0	0	8	9	2	0
Gm13561	0	0	2	0	0	2	1	0	0
Gm20453	0	0	0	0	0	0	1	0	0
Gm4462	0	0	24	0	0	4	6	37	0
Akr1a1	9	0	0	0	0	8	4	5	0
Gm15582	1	0	0	0	0	3	0	0	0
Cyp2d11	2	0	1	0	0	6	0	4	0
Aen	0	0	0	0	0	18	12	2	0
Ifna2	0	0	0	0	0	0	0	2	0
Zfp773	0	0	0	0	0	3	10	0	0
Dhrs3	0	0	11	0	0	23	9	0	0
Gm11508	0	0	6	8	0	0	0	18	0
Gm11490	0	1	0	0	0	10	0	5	0
Gm5475	0	0	19	0	0	0	4	21	0
Gm10136	0	0	5	13	0	1	4	11	0
Gm4840	0	0	2	0	0	1	1	0	0
Pdia4	1	1	0	0	0	11	1	127	0
Ccdc101	0	0	17	5	0	5	1	5	0
AL672076.1	2	0	6	0	0	0	2	0	0
Kiss1r	25	0	39	8	0	12	0	22	0
Gm15502	5	0	0	0	0	0	0	5	0
Sipa1l3	40	5	37	12	0	12	19	24	0
Gm14540	0	0	0	0	0	0	2	0	0
Gm11955	7	0	2	3	0	3	1	1	0
Tbk1	18	0	0	0	0	26	0	27	0
Med19	0	3	45	9	0	43	9	9	0
Slamf1	0	0	31	0	0	2	2	0	0
Lepre1	0	0	0	4	0	35	49	45	0
Lax1	1	2	1	0	0	21	6	0	0
Gm13157	0	0	0	4	0	6	0	4	0
Scrn1	0	0	3	0	0	4	1	21	0
Dkk1	0	0	0	0	0	0	6	0	0
Gm11633	7	0	0	0	0	1	0	6	0
Cntf	0	19	19	0	0	0	0	5	0
Rdh16	0	1	11	2	0	4	0	16	0
Usp30	28	0	17	1	0	2	2	39	0
Gm16306	0	0	3	0	0	0	0	0	0
Snord96a	0	0	5	0	0	0	0	5	0
Dnaic2	10	0	0	12	0	5	5	2	0
Cav3	0	0	0	0	0	0	1	0	0
Ano10	11	0	3	1	0	26	17	37	0
Gm17130	0	1	0	0	0	0	1	0	0
Dlx1	1	0	0	20	0	13	7	7	0
Hinfp	0	0	19	0	0	28	0	6	0
Cast	0	0	15	0	0	21	0	21	0
Notch2	1	1	9	0	0	2	5	10	0
Plekhg5	0	1	11	24	0	5	13	85	0
Lipa	0	0	15	0	0	13	14	15	0
Ano8	20	0	39	18	0	20	16	36	0
Gm16978	0	0	0	0	0	1	0	1	0
Gm14105	0	0	0	0	0	1	0	0	0
Ubxn10	1	0	0	0	0	0	0	14	0
Ext1	0	0	4	0	0	51	3	1	0
Nipal3	23	0	30	37	0	15	16	12	0
Pcif1	11	0	2	19	0	19	17	50	0
Grsf1	0	0	0	0	0	2	1	9	0
Gm14115	0	0	0	11	0	1	0	0	0
Tmx2	0	3	45	11	0	37	6	11	0
Gm16244	0	0	0	0	0	2	0	0	0
Gm15624	0	0	0	4	0	3	1	20	0
Kctd14	25	0	1	0	0	24	0	13	0
D19Bwg1357e	0	0	0	0	0	17	1	17	0
Cdcp2	3	0	2	0	0	1	0	3	0
Gm10052	0	0	0	0	0	12	16	0	0
1700099I09Rik	0	0	2	0	0	5	0	0	0
Smad5	8	0	34	13	0	18	21	51	0
AI428936	25	0	47	0	0	22	16	13	0
AC157798.1	0	0	0	0	0	2	2	0	0
Slc45a1	12	4	0	0	0	27	6	0	0
Gm16760	0	0	0	0	0	0	0	1	0
Mob3a	13	0	20	6	0	73	1	46	0
AC122119.1	0	0	0	0	0	2	0	2	0
Fam196a	1	1	0	0	0	5	0	2	0
Sall2	1	1	6	0	0	0	0	0	0
D130007C19Rik	8	0	0	1	0	1	1	41	0
Rhbdl1	3	4	0	12	0	16	12	30	0
Dmtf1	10	1	4	0	0	1	0	41	0
Apoa2	4	0	35	10	0	25	17	10	0
Cyp11a1	12	0	3	27	0	1	1	8	0
1700007J10Rik	0	0	3	0	0	6	4	1	0
Gpr97	28	0	45	5	0	37	41	10	0
9030624J02Rik	10	0	25	0	0	1	3	14	0
A430084P05Rik	2	0	5	0	0	0	0	24	0
Bbs12	8	0	0	0	0	22	8	15	0
Mlh1	3	2	3	0	0	12	6	28	0
Gaa	13	0	48	26	0	12	10	19	0
4930486L24Rik	0	0	5	0	0	13	1	0	0
C230066G23Rik	0	0	1	0	0	5	5	4	0
Gm15650	1	0	3	0	0	2	0	0	0
AI838599	1	0	0	0	0	6	6	3	0
Gm8994	6	5	6	0	0	0	0	5	0
Cep57	0	0	0	0	0	26	3	0	0
Car15	3	0	3	9	0	11	29	59	0
Gm14116	0	0	0	5	0	0	0	0	0
Aaas	13	5	46	3	0	15	6	9	0
Adcyap1	0	0	2	0	0	0	0	0	0
Gm16316	0	0	6	0	0	2	0	0	0
Pelp1	4	6	18	4	0	19	2	10	0
Naif1	0	0	34	4	0	37	19	67	0
Vmn2r86	0	0	0	0	0	0	0	3	0
Rnf220	8	0	9	9	0	18	20	24	0
Fscn2	28	0	0	0	0	6	0	27	0
Mettl21d	0	26	11	0	0	66	11	46	0
Pcgf2	8	0	9	55	0	12	29	61	0
Gm13542	1	1	0	4	0	7	0	42	0
Nubp2	26	7	53	1	0	3	6	45	0
BC052040	0	0	0	0	0	3	3	1	0
Top3a	2	2	0	0	0	2	2	14	0
Xrcc3	0	4	17	9	0	39	6	37	0
4930550C17Rik	1	0	0	2	0	0	0	0	0
Phyhipl	0	0	0	0	0	0	0	13	0
Csda	0	0	0	0	0	16	0	0	0
Gm15511	0	0	0	0	0	5	0	2	0
Rimkla	0	0	0	3	0	25	18	13	0
Atxn2	0	2	24	0	0	14	2	64	0
A730037C10Rik	0	0	0	8	0	0	1	5	0
2610028E06Rik	0	0	0	0	0	0	0	3	0
Gm13080	0	0	0	0	0	0	0	1	0
Acaca	2	0	3	0	0	38	7	0	0
Gpr44	1	0	8	5	0	0	1	0	0
Fbxl8	4	2	0	0	0	9	16	19	0
Gm10134	0	0	1	1	0	4	0	33	0
Atp13a1	0	0	0	19	0	7	2	27	0
Lnx1	0	0	0	0	0	4	14	0	0
Pgk2	0	0	0	0	0	0	0	3	0
Gfi1b	0	0	0	0	0	5	0	24	0
Rdh12	0	0	0	0	0	5	5	1	0
AC159379.1	0	0	0	1	0	0	0	1	0
Gm12425	1	0	1	0	0	0	0	3	0
Slc1a6	0	0	14	8	0	2	0	11	0
Gm11739	4	4	20	9	0	8	4	12	0
Lnp	1	0	0	56	0	1	1	8	0
B130055M24Rik	0	0	11	0	0	6	4	0	0
Ttn	0	0	0	0	0	4	1	1	0
BC042782	1	0	0	0	0	3	0	0	0
Spert	0	0	1	0	0	0	0	3	0
Gm15722	0	0	0	0	0	10	5	8	0
2700069I18Rik	0	0	3	0	0	0	2	2	0
Anapc16	0	0	20	21	0	51	7	18	0
Ddit4	0	0	23	25	0	50	9	18	0
Slc45a4	4	0	0	0	0	1	12	0	0
Gm16305	0	0	9	0	0	0	0	0	0
Gm11762	0	0	0	0	0	1	1	0	0
Gm12206	0	0	0	0	0	1	0	4	0
9930014A18Rik	0	0	0	0	0	2	0	0	0
Endod1	0	0	0	0	0	14	8	66	0
Mir682	0	0	2	0	0	0	0	0	0
Gm12730	1	0	0	0	0	0	0	2	0
Rrp9	0	0	31	6	0	22	0	11	0
Rpl23	12	0	11	62	0	18	33	59	0
Gm14248	0	0	3	0	0	3	0	10	0
Vps35	27	7	7	1	0	33	7	58	0
Gm14078	0	0	0	0	0	1	0	2	0
Gm13039	0	0	3	0	0	1	0	27	0
Psg17	0	0	8	1	0	4	0	0	0
Rfwd2	0	0	0	0	0	1	0	0	0
Gm17699	0	0	0	1	0	0	0	0	0
Mir365	0	1	3	0	0	2	3	0	0
Tgm2	0	1	1	6	0	13	11	16	0
Ppp2r2c	3	0	7	9	0	0	0	2	0
Nmt2	2	0	0	0	0	1	10	47	0
Slc28a2	0	0	4	19	0	2	2	23	0
Serpinf2	0	0	7	0	0	15	10	2	0
Gm17292	1	2	3	0	0	3	0	11	0
Mipol1	0	0	5	0	0	2	0	0	0
Cib1	7	0	47	0	0	36	4	186	0
Rint1	0	0	0	0	0	14	8	23	0
Gm17378	1	0	0	0	0	0	0	0	0
Nat15	0	0	0	0	0	19	5	8	0
Itpr2	12	0	7	0	0	30	34	0	0
Gm17574	0	0	3	4	0	1	3	4	0
Osgin1	1	2	1	0	0	2	11	52	0
Hnrnpa0	0	0	0	0	0	13	0	110	0
Slc2a2	0	0	0	0	0	3	3	0	0
A830031A19Rik	0	0	0	0	0	2	0	4	0
Myo1d	0	0	0	2	0	7	0	2	0
Snrpg	0	0	7	0	0	41	10	19	0
Gm13866	0	0	0	0	0	0	2	0	0
Apobec2	2	0	0	0	0	7	12	0	0
Fam120c	0	1	0	0	0	0	1	1	0
Efcab3	0	0	0	0	0	0	3	2	0
Gm15148	0	1	0	0	0	0	0	0	0
Scamp2	3	0	14	24	0	36	13	46	0
Gm13864	1	2	25	0	0	13	1	1	0
Gm13879	0	0	2	0	0	1	5	2	0
Gm11543	0	0	0	1	0	1	0	0	0
Gm10125	3	0	2	0	0	2	0	14	0
Mir421	1	0	0	0	0	0	0	0	0
Rufy1	4	0	1	5	0	8	15	22	0
AC113291.1	0	0	0	0	0	0	0	1	0
Slc12a7	11	0	17	0	0	14	9	11	0
Tbc1d4	3	3	0	2	0	3	1	0	0
Gm17502	0	0	4	0	0	0	0	0	0
Snord23	0	0	16	0	0	4	4	2	0
Gm6592	1	0	0	0	0	0	0	1	0
Hist4h4	11	5	7	0	0	6	0	1	0
Sytl3	0	0	15	0	0	12	0	0	0
AV039307	0	0	0	0	0	0	0	17	0
Cav1	33	18	12	0	0	0	2	0	0
Insrr	0	0	4	24	0	10	10	23	0
1110046J04Rik	0	0	0	0	0	1	1	1	0
Sh3d19	0	2	15	0	0	6	0	0	0
Dear1	1	0	0	0	0	0	0	0	0
4930524O07Rik	0	0	0	1	0	1	2	0	0
Slc4a8	3	0	36	10	0	21	11	40	0
Zfp275	0	0	5	0	0	0	0	1	0
Atp1a1	6	0	7	23	0	7	19	17	0
2900097C17Rik	1	2	0	0	0	2	0	7	0
Adipor2	0	6	0	11	0	17	8	10	0
Irak3	0	0	0	0	0	10	3	3	0
Nsun4	0	0	0	12	0	27	10	31	0
Gm11930	0	2	0	0	0	0	3	2	0
Tnn	0	0	0	0	0	8	0	12	0
4930456L15Rik	0	0	0	0	0	0	0	6	0
Gm16266	0	0	4	0	0	6	2	7	0
Gm7666	1	4	9	0	0	0	14	0	0
Lass5	2	0	44	12	0	42	48	57	0
2310044G17Rik	0	0	53	1	0	0	0	9	0
Rras2	11	11	6	0	0	7	0	63	0
Gm15995	0	0	2	0	0	11	2	1	0
Gm12500	1	0	0	0	0	14	3	6	0
Slc25a30	0	0	7	0	0	2	1	40	0
Psmb2	0	0	7	2	0	54	5	50	0
Fbxo47	2	0	0	7	0	3	2	6	0
3100002H09Rik	0	0	0	0	0	0	1	5	0
Rad9b	24	2	12	0	0	12	0	48	0
AI462493	12	0	28	0	0	17	1	1	0
D630008O14Rik	0	0	0	0	0	2	2	0	0
Map3k10	3	0	11	9	0	12	4	27	0
Cyp2ab1	0	1	2	0	0	3	0	11	0
9130206I24Rik	0	0	0	5	0	8	3	9	0
Gm5830	0	0	0	0	0	1	1	1	0
Sesn1	22	0	20	0	0	52	18	0	0
Gmfg	16	0	7	0	0	13	9	47	0
Ap3s2	10	0	10	2	0	20	0	128	0
Zfp959	0	0	13	0	0	11	2	22	0
Gm9071	0	0	0	0	0	1	0	1	0
Myc	62	14	0	0	0	8	0	0	0
Kcnmb4	0	0	2	0	0	21	0	17	0
Parl	0	3	17	0	0	5	5	68	0
Cnnm3	0	0	18	0	0	5	11	4	0
Gm8129	1	1	1	31	0	0	2	2	0
Scn2b	5	11	12	3	0	11	12	14	0
Gm16047	28	0	18	14	0	11	4	11	0
Drd4	2	1	22	0	0	3	1	9	0
Pkdcc	6	0	4	1	0	0	4	3	0
Gm16493	0	0	1	0	0	9	2	7	0
Dnajc7	5	0	30	10	0	33	2	29	0
Gabpb2	31	6	39	0	0	7	1	8	0
Tead1	15	0	14	0	0	76	29	1	0
Gxylt1	0	0	0	0	0	5	4	7	0
SNORD124	0	0	3	3	0	12	8	12	0
Gm20545	1	1	6	6	0	2	4	19	0
Loxhd1	0	0	0	0	0	2	0	0	0
Fgf4	2	0	1	0	0	0	0	0	0
Fzr1	2	0	74	20	0	25	0	77	0
Gm13030	0	0	0	0	0	0	0	3	0
Gm13848	0	0	0	0	0	2	0	0	1
Olfr763	0	0	1	0	0	0	1	2	0
Galntl2	11	3	12	0	0	0	1	0	0
Map3k14	16	0	5	5	0	9	3	14	0
Gm15454	0	0	1	0	0	1	1	9	0
2510039O18Rik	0	0	0	20	0	21	0	12	0
Gm17141	1	0	0	2	0	0	0	1	0
Tbc1d17	2	0	25	2	0	17	4	33	0
Gm10293	3	4	2	0	0	67	15	16	0
4933426D04Rik	0	0	0	0	0	1	1	16	0
Tmem176b	5	11	30	2	0	15	22	11	0
Olfr1380	0	0	0	0	0	1	0	0	0
AW121686	0	0	4	2	0	0	0	3	0
Prss54	0	0	2	0	0	0	1	2	0
Sept5	0	0	13	25	0	25	11	43	0
Gm14396	1	0	0	41	0	1	1	3	0
Ppara	14	0	78	12	0	1	28	14	0
Zfp663	6	0	3	31	0	13	22	13	0
Ccnt1	1	0	0	52	0	10	7	45	0
Pde12	0	0	4	0	0	13	0	1	0
4932411G14Rik	0	0	0	0	0	0	0	3	0
Phospho2	0	12	0	0	0	3	1	17	0
Mixl1	0	0	0	0	0	2	1	0	0
Gltpd1	3	0	7	0	0	0	16	11	0
Gm853	6	0	2	0	0	0	0	2	0
Gnai3	11	0	0	2	0	28	9	48	0
Ms4a5	0	0	2	0	0	1	0	0	0
Gm12269	0	0	0	0	0	1	5	1	0
Hpcal1	4	1	0	0	0	40	1	4	0
Gm4782	4	1	3	0	0	0	0	0	0
Mir484	0	0	0	2	0	0	0	0	0
Naprt1	8	0	27	18	0	4	9	5	0
Rps6kc1	0	0	2	13	0	11	2	22	0
Gm13191	0	0	0	0	0	0	0	1	0
Gpr19	0	0	4	0	0	47	21	2	0
B3galtl	0	0	0	17	0	1	0	2	0
Smek1	1	0	7	6	0	2	0	19	0
Cyp3a11	0	0	0	0	0	2	1	4	0
Tmem115	22	1	35	21	0	4	4	37	0
Rab19	0	0	0	0	0	0	0	33	0
4930477E14Rik	0	0	9	0	0	0	0	1	0
Hist1h4f	15	0	2	0	0	3	3	7	0
Gm12956	0	0	0	2	0	5	4	8	0
Tmem104	15	0	34	18	0	4	1	11	0
Zfp592	15	2	41	0	0	8	2	23	0
Gm9870	0	0	4	0	0	3	1	0	0
Chrnb4	6	0	0	4	0	0	1	5	0
Dtx1	16	0	32	17	0	4	0	11	0
Prdm1	0	0	3	0	0	0	2	0	0
Alox15	4	3	12	0	0	6	1	4	0
1700003E16Rik	0	0	0	6	0	14	6	43	0
Cdc42se2	3	0	33	0	0	1	3	0	0
Gm13391	0	0	0	0	0	2	0	1	0
Ttll7	0	0	0	0	0	0	3	0	0
Ninl	0	0	3	0	0	2	4	18	0
Ppp6r3	16	0	34	0	0	3	3	43	0
Appbp2	0	0	6	3	0	6	11	0	0
Dhx16	55	0	52	70	0	16	0	52	0
Gm16027	10	3	3	0	0	0	0	0	0
Gm12653	0	0	0	17	0	0	0	6	0
Krtap5	0	0	6	0	0	5	0	0	0
Tfe3	0	0	57	0	0	0	0	6	0
Neurod1	0	0	2	3	0	1	0	0	0
Cercam	17	3	10	0	0	1	6	81	0
Gm17456	0	0	0	1	0	0	0	0	0
Ube3c	2	0	0	14	0	24	5	13	0
Gm9987	0	0	0	0	0	0	0	1	0
Gm16226	0	0	0	2	0	0	0	0	0
Nfkbib	17	1	41	2	0	12	1	23	0
Gpr35	9	0	0	8	0	0	3	19	0
Ccnd2	0	0	0	6	0	16	8	0	0
Mesp1	1	0	2	6	0	3	0	24	0
Rft1	1	1	8	0	0	12	11	0	0
Nrip2	8	0	12	20	0	15	12	87	0
Gm16407	0	0	6	0	0	0	0	0	0
Slc1a5	7	0	29	4	0	27	9	72	0
SNORA74	3	3	12	5	0	2	13	2	0
4930578M01Rik	1	0	0	11	0	0	2	7	0
Zfhx2	69	5	18	9	0	0	0	21	0
Gm5600	0	1	0	0	0	0	0	1	0
Gm11856	0	0	0	0	0	0	0	2	0
Yy1	2	0	0	6	0	40	16	74	0
Gm14009	0	0	0	0	0	6	4	0	0
Ugt2b35	2	2	1	0	0	0	0	0	0
Fam166b	13	2	47	0	0	0	5	7	0
Gm14554	0	0	0	0	0	0	0	9	0
Map3k6	31	4	131	0	0	42	9	38	0
Gm15725	10	3	10	0	0	0	0	10	0
4930522N08Rik	0	0	0	1	0	0	0	0	0
Vmn2r56	0	0	1	0	0	0	0	0	0
1700022N22Rik	0	0	0	0	0	5	0	12	0
Gm12529	1	0	5	0	0	21	18	0	0
Gm14316	2	0	0	0	0	6	1	9	0
Gm3695	6	0	0	9	0	1	0	18	0
Bmp5	0	0	0	1	0	5	0	15	0
Gm9812	0	0	1	0	0	0	0	0	0
Snord13	0	0	0	0	0	1	0	0	0
Gm9920	1	0	0	0	0	7	0	12	0
Klra2	0	0	0	0	0	7	0	0	0
4933415F23Rik	0	0	0	0	0	2	0	4	0
Sel1l	0	0	0	0	0	13	3	26	0
Gm16677	1	0	0	0	0	0	0	0	0
Hexa	0	0	0	116	0	3	0	79	0
Pcdhb8	0	0	0	6	0	0	0	4	0
Gm17397	0	0	0	0	0	1	0	4	0
Ppp1r3g	0	0	0	0	0	2	1	8	0
Mdfi	2	0	0	14	0	62	59	27	0
Nos3	2	0	16	12	0	1	15	66	0
Gm16111	0	0	0	0	0	6	0	1	0
Gm14921	0	0	0	0	0	1	0	1	0
Cnksr3	0	0	0	0	0	13	1	0	0
Olfr410	0	0	1	0	0	1	0	0	0
Gm9574	4	1	13	16	0	2	4	28	0
Snrpd3	0	0	29	0	0	46	28	4	0
Clec4a3	0	0	9	2	0	0	0	9	0
U11	3	0	2	6	0	12	2	29	0
Vangl2	0	0	29	3	0	1	10	0	0
Gsk3b	7	0	11	0	0	0	0	9	0
Gm15723	2	3	0	2	0	0	0	0	0
Itpkb	0	10	0	0	0	2	0	4	0
Egln2	12	0	65	16	0	10	10	30	0
Crygc	0	0	1	0	0	0	0	2	0
Gm16021	0	0	0	5	0	3	1	1	0
AC165250.1	1	0	1	0	0	0	0	2	0
Tas2r143	0	0	2	0	0	0	0	0	0
Eif4b	18	9	81	0	0	15	5	11	0
Cd48	0	0	49	0	0	3	1	0	0
Gm17489	0	0	0	0	0	1	2	4	0
Nrgn	6	0	0	20	0	3	10	49	0
AC156032.1	2	0	0	0	0	8	2	2	0
Trbc2	0	0	0	0	0	0	0	11	0
Spint1	3	0	0	12	0	39	14	4	0
Gm7984	0	0	0	0	0	2	0	2	0
Zmynd19	2	0	14	3	0	2	6	9	0
Dph3b	0	0	1	0	0	1	0	0	0
F8a	0	0	5	0	0	0	0	1	0
Xcl1	0	0	0	5	0	4	0	5	0
Pcyt1b	0	0	0	0	0	0	0	2	0
Fancm	0	0	0	0	0	0	24	23	0
Clk3	8	0	15	37	0	14	6	47	0
Prdm4	8	0	0	1	0	0	17	34	0
Cd40lg	0	0	0	0	0	0	0	1	0
Mphosph10	6	0	8	0	0	1	13	1	0
Cldn22	0	0	0	0	0	1	0	14	0
Arhgap33	11	0	16	0	0	19	4	2	0
Kif12	0	0	1	0	0	13	19	2	0
Gm15930	0	0	0	0	0	0	0	2	0
Rbmxl1	0	0	0	1	0	1	0	0	0
Atf2	3	2	2	6	0	0	0	5	0
Scn8a	6	0	3	17	0	3	1	24	0
Gm6081	1	0	1	0	0	2	0	0	0
Tert	11	0	1	3	0	10	10	6	0
Mirlet7b	3	0	8	5	0	0	6	7	0
Gm14127	0	0	0	0	0	3	1	2	0
Gm11847	0	0	2	0	0	1	15	22	0
Gm15327	6	4	5	0	0	3	0	19	0
Sord	0	0	8	32	0	9	9	72	0
Cga	0	1	0	0	0	0	0	2	0
H2afb1	0	0	0	0	0	0	0	11	0
Svs2	0	0	0	0	0	1	0	2	0
1700008O03Rik	0	0	0	3	0	0	0	3	0
1110004F10Rik	0	0	38	0	0	12	17	0	0
Myef2	0	0	0	0	0	6	18	0	0
Gm11398	8	1	0	0	0	3	0	0	0
Stx16	0	0	0	0	0	18	1	23	0
I830077J02Rik	0	0	0	0	0	7	4	8	0
N4bp2	8	4	40	0	0	29	3	14	0
Cps1	0	0	1	0	0	2	1	0	0
Ndufaf2	0	0	0	0	0	7	2	5	0
Hoxb1	5	0	1	71	0	0	0	5	0
Zfp541	0	0	14	0	0	9	3	4	0
2810030E01Rik	8	0	2	6	0	3	0	98	0
B3gat3	12	0	13	0	0	14	1	2	0
Zfp39	0	0	8	7	0	1	4	2	0
Gm20603	9	0	5	6	0	0	5	9	0
Gm16101	0	0	0	0	0	1	5	0	0
Slc52a3	1	0	0	13	0	13	21	13	0
Scara3	28	25	23	4	0	23	0	16	0
1500002C15Rik	1	0	3	0	0	0	2	9	0
Gm10294	1	1	0	1	0	3	8	0	0
Wbscr17	0	0	0	0	0	0	3	2	0
H2-Ke2	3	0	3	0	0	0	0	1	0
D830026I12Rik	6	3	1	0	0	0	0	0	0
4922501L14Rik	0	0	0	5	0	0	0	3	0
Hsd11b2	3	0	12	2	0	20	12	46	0
C79798	0	0	0	0	0	0	0	1	0
Gm3448	0	0	0	0	0	0	3	1	0
4930583H14Rik	0	24	0	0	0	2	2	34	0
Atcay	3	0	23	17	0	16	1	54	0
Sbf2	22	0	13	0	0	18	4	2	0
Tcf3	31	3	50	16	0	36	1	63	0
5430417L22Rik	4	3	6	20	0	22	0	12	0
Mcpt4	0	0	0	1	0	0	0	2	0
Gm7079	0	0	8	0	0	0	0	7	0
Thnsl2	0	0	11	0	0	6	5	18	0
Eif2ak3	0	0	10	0	0	2	7	3	0
Gm6493	1	0	2	0	0	5	0	0	0
Gabra1	0	0	0	0	0	0	4	0	0
Scn3b	0	0	0	7	0	5	8	2	0
Tspan10	16	0	0	0	0	2	0	23	0
Arpc5l	4	0	0	4	0	2	5	16	0
4631405K08Rik	0	0	1	0	0	0	0	0	0
Gm13073	2	0	6	0	0	4	2	4	0
Srxn1	4	0	0	20	0	21	27	14	0
Gm13283	0	0	0	0	0	0	0	2	0
Angptl6	52	2	18	26	0	16	16	20	0
Dlc1	0	0	13	0	0	10	1	1	0
AL805972.1	0	0	1	0	0	0	0	3	0
2010109K11Rik	0	0	12	0	0	13	3	13	0
Zfp639	0	2	0	0	0	5	1	66	0
Rhot1	22	2	1	0	0	7	1	8	0
Ppp2r5c	0	1	7	0	0	10	10	38	0
Gm11400	0	0	0	0	0	200	8	78	0
Uggt2	0	0	1	15	0	24	1	29	0
Eya4	0	0	0	4	0	0	0	4	0
SNORA44	1	1	0	7	0	9	4	10	0
Gm14994	0	0	0	0	0	1	0	0	0
Pafah1b3	32	0	28	33	0	7	21	74	0
Pdgfc	6	2	0	0	0	5	3	5	0
Slc7a12	2	0	0	0	0	0	0	1	0
Gm17111	0	0	2	0	0	3	3	22	0
Enc1	0	1	5	0	0	43	13	59	0
Hagh	29	8	43	1	0	5	3	58	0
Utf1	4	0	1	11	0	0	0	3	0
Gga2	1	0	0	0	0	9	9	59	0
Dak	7	0	11	10	0	6	4	5	0
9530036O11Rik	0	0	0	0	0	0	0	2	0
5830416P10Rik	0	0	0	0	0	1	5	7	0
Mrpl55	0	0	32	21	0	0	2	13	0
Arhgap12	6	0	5	0	0	1	0	0	0
Edem2	8	1	8	0	0	2	15	8	0
Itpr1	35	0	5	0	0	27	13	16	0
Pigq	9	4	0	5	0	20	4	48	0
Arid4a	10	1	8	0	0	14	0	83	0
Zfp677	2	0	70	0	0	0	0	6	0
Rarg	14	5	54	2	0	12	5	17	0
Vmn1r76	0	0	0	0	0	0	1	0	0
Rab40b	3	0	2	0	0	9	4	0	0
Cyp4a29	0	0	0	1	0	0	0	0	0
Map3k13	0	0	20	0	0	26	10	10	0
AC147162.1	0	0	3	2	0	3	0	0	0
Mefv	0	0	0	0	0	5	0	0	0
2310035C23Rik	0	0	6	0	0	2	1	0	0
Mab21l2	0	0	8	0	0	0	2	0	0
Aloxe3	0	0	2	5	0	17	19	0	0
Dhx57	5	7	3	0	0	10	4	1	0
Gm14424	0	0	0	14	0	0	0	1	0
Jak1	0	0	20	0	0	4	3	28	0
Loh12cr1	1	0	13	0	0	14	5	2	0
Gm14389	0	0	0	0	0	2	2	3	0
Sdcbp	0	0	0	0	0	4	1	1	0
Mrgprb2	0	0	1	0	0	0	0	1	0
Mrpl36	2	0	0	9	0	3	12	3	0
C2cd4d	1	0	0	0	0	0	0	0	0
Gm10076	0	0	0	0	0	50	25	20	0
Jub	13	0	2	4	0	12	0	17	0
Ndnl2	0	0	0	0	0	0	2	20	0
Gm8439	0	0	0	3	0	0	7	5	0
Lass2	31	8	45	0	0	16	1	20	0
Fem1a	4	0	18	4	0	18	16	43	0
Deptor	2	0	0	0	0	15	2	16	0
Gm12058	0	0	0	0	0	22	2	0	0
Bcmo1	0	0	1	0	0	13	9	19	0
Epc1	0	0	0	0	0	19	2	0	0
Plekhh1	0	0	0	0	0	8	3	2	0
Ubqln2	0	1	0	0	0	1	0	0	0
Ang4	2	2	4	0	0	0	0	0	0
Il13	0	0	4	0	0	1	0	1	0
Ubxn8	7	0	4	0	0	27	0	46	0
Taf9	16	0	6	0	0	19	5	47	0
Gm14236	4	0	2	0	0	0	1	6	0
G530011O06Rik	0	0	10	0	0	13	1	1	0
Prss45	10	0	6	0	0	0	0	7	0
Dlgap2	0	0	0	0	0	2	1	5	0
Rpl18	120	1	87	58	0	67	21	141	0
Il28a	0	0	2	0	0	1	0	0	0
Gm2237	0	0	0	0	0	2	0	0	0
Syt14	0	0	10	18	0	3	2	17	0
Gm11833	0	0	0	0	0	2	1	6	0
Pnma1	1	3	3	0	0	73	0	107	0
Gm13868	0	0	0	0	0	5	15	7	0
Pdgfa	57	1	9	0	0	9	24	0	0
AC110211.1	11	0	22	13	0	4	4	13	0
Rsc1a1	60	12	33	13	0	9	6	70	0
Myh1	0	0	0	0	0	0	0	2	0
Gm3329	0	0	0	0	0	2	0	6	0
Osbpl1a	10	12	41	0	0	1	0	0	0
1700025K23Rik	0	0	0	0	0	2	8	0	0
Whamm	13	0	7	14	0	2	0	61	0
Gm9982	2	0	0	2	0	0	0	10	0
Gm8566	0	1	0	0	0	18	14	40	0
Mir135b	0	0	1	4	0	0	0	2	0
Usp40	0	2	4	0	0	94	21	44	0
1700041G16Rik	1	0	4	0	0	4	0	2	2
Rasl2	6	0	0	20	0	2	4	41	0
Exoc3l2	0	0	11	13	0	1	5	12	0
Gm16167	1	0	0	0	0	0	0	5	0
Gm14138	4	0	1	13	0	35	14	2	0
Copg	1	1	1	23	0	62	12	28	0
Gm10354	0	0	0	0	0	0	0	0	3
Tph1	1	0	0	0	0	0	3	1	0
Apoa5	3	0	4	0	0	4	0	0	0
Gm12457	0	0	0	0	0	1	0	1	1
Fam187a	0	0	0	6	0	8	0	11	0
Olfr1340	0	0	0	0	0	0	0	1	0
Zfp800	3	1	1	1	0	8	1	16	0
Mettl6	61	0	74	0	0	0	10	0	0
Dhcr24	29	7	19	0	0	13	1	30	0
Cpxm2	4	0	0	0	0	14	4	0	0
Spata5	7	0	0	0	0	33	4	15	0
1700011H14Rik	0	0	0	0	0	0	0	3	0
Dffa	2	0	2	15	0	9	18	25	0
Abi3	2	0	1	40	0	23	38	53	0
Fbxw13	0	0	5	0	0	0	0	0	0
Slc25a37	4	0	0	7	0	0	7	7	0
Rad21	0	0	0	0	0	0	1	2	0
Gm5819	0	0	0	0	0	0	0	1	0
Nod1	0	0	23	0	0	7	15	60	0
Odf1	0	0	10	0	0	5	2	1	0
Atxn7l3	31	0	51	3	0	30	13	107	0
Spink8	0	0	1	0	0	1	0	17	0
Wnt10a	2	0	0	31	0	2	0	6	0
Usp34	0	0	0	0	0	3	3	21	0
Trap1	4	0	5	0	0	17	7	14	0
4930521C21Rik	4	0	5	0	0	1	0	5	0
Cdc40	4	0	0	0	0	2	4	11	0
Smt3h1	0	1	0	0	0	1	0	0	0
Gm11952	0	0	1	7	0	1	0	0	0
1700022P22Rik	0	0	1	7	0	6	2	36	0
Zmpste24	0	0	0	0	0	12	3	34	0
9330154K18Rik	0	0	1	0	0	2	0	0	0
Usp31	0	0	0	0	0	1	0	27	0
Tmem70	0	0	0	0	0	0	0	12	0
Serinc4	0	0	2	0	0	0	0	11	0
SNORA32	7	4	12	16	0	20	10	30	0
Coq7	5	0	24	0	0	5	2	17	0
Micalcl	16	1	9	0	0	3	4	0	0
4833439L19Rik	77	2	0	18	0	1	0	40	0
Gm15965	0	0	1	1	0	1	1	0	0
Myoz3	6	0	9	0	0	1	0	1	0
4930426D05Rik	0	0	0	0	0	0	0	2	0
Cyp4f15	4	4	13	2	0	0	1	2	0
Gm14200	0	0	0	2	0	7	3	5	0
Abhd14b	1	0	33	3	0	24	2	16	0
Bsdc1	0	0	8	4	0	30	30	53	0
Wrap53	0	0	21	13	0	7	0	50	0
Kdm3b	0	0	4	2	0	34	2	4	0
Miat	0	0	0	6	0	0	1	12	0
1700121F15Rik	0	0	0	0	0	3	5	13	0
Traj45	1	0	0	0	0	0	2	1	0
Slc17a2	14	0	1	0	0	1	1	8	0
Smarce1	0	0	7	0	0	22	17	32	0
Gm4894	0	0	0	0	0	0	1	0	0
Lrp12	0	0	2	0	0	4	1	0	0
Anp32b	0	0	27	1	0	2	8	37	0
Foxj1	10	0	47	13	0	13	1	22	0
Yipf6	0	0	0	0	0	1	0	1	0
4921513D11Rik	0	0	2	0	0	0	0	0	0
Acadsb	5	2	0	13	0	2	0	2	0
Gm13401	5	0	0	5	0	1	0	10	0
Lrrc32	4	10	0	3	0	11	0	5	0
Usp25	0	0	8	0	0	29	0	0	0
Btn1a1	0	0	0	0	0	0	4	2	0
Cd1d1	2	0	3	23	0	0	27	0	0
Zfp354a	0	0	0	0	0	0	0	5	0
Lman1l	0	0	3	2	0	4	0	6	0
Cilp	11	0	0	0	0	9	9	20	0
Gm5566	0	0	0	14	0	1	0	0	0
Srrm3	8	0	6	0	0	4	0	10	0
Mavs	43	1	1	12	0	13	16	15	0
Mir1982	0	0	3	3	0	12	0	16	0
Tmem168	1	0	1	0	0	0	0	36	0
Prss22	0	0	3	5	0	0	3	14	0
Tmie	25	0	9	0	0	2	1	25	0
1110028F11Rik	0	0	1	0	0	0	2	3	0
Vps37a	21	2	6	0	0	0	1	26	0
Ptcd3	14	0	21	0	0	76	24	33	0
Naa20	0	0	0	0	0	17	16	0	0
2810055G20Rik	0	0	26	0	0	0	0	2	0
Gm20419	2	0	1	2	0	0	0	0	0
Gm12179	0	0	3	0	0	0	0	0	0
Ifnb1	1	0	0	0	0	0	0	0	0
Diablo	7	0	24	9	0	18	7	16	0
4930449E01Rik	0	0	0	0	0	0	3	0	0
Nod2	0	0	3	3	0	0	3	0	0
Hoxd3	1	0	0	67	0	1	1	10	0
Birc7	0	0	0	1	0	0	1	3	0
Eftud2	11	0	2	19	0	32	6	53	0
Gm11332	0	0	0	0	0	0	3	0	0
Mex3d	30	3	49	8	0	36	1	62	0
SCARNA20	5	2	7	3	0	13	1	13	0
Gm10345	22	0	61	16	0	7	24	21	0
Gm17209	10	0	6	12	0	9	10	17	0
Plxnb1	0	0	40	0	0	0	8	1	0
Apoa1	5	0	5	0	0	37	5	0	0
Trip11	0	0	0	0	0	1	1	3	0
Hook2	37	0	1	3	0	52	8	96	0
Pitpnm2	11	0	15	0	0	27	47	29	0
Gm4841	3	0	3	0	0	2	0	0	0
E130006D01Rik	0	0	0	0	0	1	0	0	0
Gm12786	20	2	8	0	0	5	0	4	0
Gm12123	0	0	0	6	0	1	2	0	0
Aldh1a2	0	0	0	8	0	8	0	0	0
Gtf3a	5	0	15	0	0	33	1	3	0
Btbd1	0	0	14	21	0	6	0	41	0
Smpd1	0	0	0	0	0	0	0	6	0
BC017643	2	0	2	0	0	12	3	6	0
Zfp931	3	0	3	0	0	0	0	10	0
Snrp1c	1	0	0	0	0	3	0	0	0
Gm12365	0	0	1	0	0	0	0	0	0
Gm10563	1	0	2	0	0	0	0	13	0
Pkm2	0	0	0	126	0	3	4	73	0
Col24a1	0	0	0	0	0	0	1	0	0
Gm6219	0	0	0	0	0	1	0	2	0
Matn3	0	0	0	0	0	15	4	0	0
Krt17	5	0	7	0	0	0	2	6	0
Grhpr	1	0	1	8	0	5	0	16	0
Pgr	0	0	0	0	0	0	0	5	0
Lrp1	0	1	36	6	0	3	0	36	0
Gm16254	7	0	6	1	0	0	0	13	0
Gm11642	0	0	0	3	0	0	0	4	0
Gm15179	4	0	0	22	0	0	6	4	0
Gm13861	3	3	15	0	0	5	0	0	0
Gm10224	0	0	26	22	0	0	0	22	0
1700010B08Rik	0	0	0	0	0	8	0	3	0
Il2ra	0	1	9	0	0	4	0	15	0
Atg16l1	0	6	6	0	0	67	24	74	0
Doc2a	0	0	10	7	0	7	1	6	0
Traj17	1	0	0	0	0	0	2	0	0
Gm12982	6	0	0	4	0	1	1	2	0
Thoc3	67	2	0	15	0	1	0	37	0
[truncated: 22,710 more rows]

## Sheet: SuppTable3d
Supplemental Table 3d: Enhancer LAAsP-mods linked to LAAsP genes from '10mo Aged Veh over 5mo Adult Veh' comparison (Figure 4c)
Number of peaks in enhancers (for each histone mark) linked to DEGs (Enhancer Atlas, merged anchors)
Genes	Peak count for H3K27ac up peaks	Peak count for H3K4me1 up peaks	Peak count for H3K4me3 up peaks	Peak count for H3K27me3 down peaks	M liver LAAsP genes (5mo to 10mo)	Peak count for H3K27ac down peaks	Peak count for H3K4me1 down peaks	Peak count for H3K4me3 down peaks	Peak count for H3K27me3 up peaks
Gm10036	0	0	0	0	4.71818	0	0	0	0
mt-Nd3	0	0	0	0	3.79332	0	0	0	0
Rpl9-ps6	0	0	0	0	3.5286	0	0	0	0
Gm12751	0	0	0	0	3.14948	0	0	0	0
Gm15501	0	0	0	0	2.95819	4	0	0	0
Rps10-ps2	0	0	0	0	2.6485	0	0	0	0
mt-Tq	0	0	0	0	2.60392	0	0	0	0
Gm28438	0	0	0	0	2.58753	0	0	0	0
Gm7536	0	0	0	0	2.46756	0	0	0	0
Rpl17-ps5	0	0	0	0	2.4076	0	0	0	0
Gm24336	0	0	0	0	2.36961	0	0	0	0
Gm10680	0	0	0	0	2.28207	0	0	0	0
Gm13577	0	0	0	0	2.21482	0	0	0	0
Rps12-ps4	0	0	0	0	2.0697	0	0	0	0
Gm4149	0	0	0	0	2.04151	0	0	0	0
Zfp992	0	0	0	0	2.04019	0	0	0	0
Snora78	1	0	0	0	2.03723	6	0	0	0
Tes3-ps	0	0	0	0	2.03052	0	0	0	0
mt-Tt	0	0	0	0	1.99672	0	0	0	0
Mir703	0	0	0	0	1.98373	0	0	0	0
Gm9843	1	0	0	0	1.97875	7	0	3	0
Gm10076	0	0	4	0	1.94886	4	0	0	0
Gm10123	0	0	8	0	1.84824	3	0	19	0
Gm22154	0	0	0	0	1.84141	0	0	0	0
Gm13339	0	0	0	0	1.83053	13	0	1	0
mt-Tw	0	0	0	0	1.81629	0	0	0	0
Zfp979	0	0	0	0	1.78635	0	0	0	0
H3f3a	1	0	0	0	1.76627	4	0	0	0
Gm22513	0	0	0	0	1.76567	0	0	0	0
Eif3j2	0	0	0	0	1.71936	0	0	0	0
Rpl10-ps3	0	0	0	0	1.71031	0	0	0	0
Gm8730	0	0	0	0	1.70591	0	0	0	0
Gm3699	0	0	0	0	1.69071	1	0	0	0
Lsm7	1	0	0	0	1.68601	21	0	0	0
Gm10925	0	0	0	0	1.6829	0	0	0	0
Atp5l	0	0	2	0	1.68209	5	0	0	0
Ndufs5	0	0	0	0	1.63942	1	0	7	0
Gm31121	0	0	0	0	1.63038	0	0	0	0
Gm28437	0	0	0	0	1.61752	0	0	0	0
Rpl34-ps1	0	0	0	0	1.60582	0	0	0	0
Gm6136	0	0	0	0	1.60389	0	0	0	0
Cdh18	0	0	0	0	1.6018	0	0	0	0
Sec61g	35	0	0	0	1.59568	0	0	0	0
Gm11361	0	0	0	0	1.59163	0	0	0	0
Rpl36-ps12	0	0	0	0	1.583	0	0	0	0
Gm5905	0	0	0	0	1.56536	0	0	0	0
Gm48702	0	0	0	0	1.55896	0	0	0	0
Gm25394	0	0	0	0	1.53654	0	0	0	0
Rps3a2	0	0	0	0	1.5244	0	0	0	0
B430119L08Rik	0	0	0	0	1.51905	0	6	4	0
Gm8430	0	0	0	0	1.51812	16	0	0	0
Rpl9	4	0	0	0	1.51332	20	0	13	0
Gm6135	0	0	0	0	1.51323	0	0	0	0
Gm10288	0	0	0	0	1.51128	0	0	0	0
Mup-ps19	0	0	0	0	1.50881	0	0	0	0
Gm44096	0	0	0	0	1.47987	0	0	0	0
Scarna13	0	0	0	0	1.46735	5	0	0	0
Terc	0	0	0	0	1.46061	0	0	0	0
Gm1821	0	0	0	0	1.45425	0	0	0	0
Gm49024	0	0	0	0	1.44857	0	0	0	0
Gm40923	0	0	0	0	1.43889	0	0	0	0
Rps23-ps1	0	0	0	0	1.43789	0	0	0	0
Gm8451	0	0	0	0	1.43007	0	0	0	0
Erh	0	0	0	0	1.42629	7	0	14	0
Jchain	0	0	0	0	1.41852	0	0	0	0
Gm14327	0	0	0	0	1.41278	0	0	0	0
Rps6-ps4	0	0	0	0	1.41256	0	0	0	0
Rnu3a	0	0	0	0	1.40436	0	0	0	0
Rps18-ps3	0	0	0	0	1.38039	0	0	0	0
Rpl27	3	0	0	0	1.37723	13	0	3	0
Dmrta1	4	0	4	0	1.37274	0	0	0	0
Gm15401	0	0	2	0	1.3614	2	0	0	0
Snora74a	0	0	0	0	1.35971	1	0	4	0
Ndufb4	2	0	0	0	1.35805	15	0	0	0
Gm15459	0	0	0	0	1.35661	2	0	0	0
Gpx4-ps2	0	0	0	0	1.34633	0	0	0	0
Ccdc152	8	0	2	0	1.3394	0	0	0	0
Rpl3-ps1	0	0	0	0	1.33519	0	0	0	0
Rpl17	2	2	3	0	1.30507	15	0	0	0
Gm15500	0	0	0	0	1.30343	0	0	0	0
Gm22009	0	0	0	0	1.29686	0	0	0	0
Ppp1r3c	0	0	1	0	1.28765	0	0	0	0
Gm36041	0	0	0	0	1.28492	0	0	0	0
Gm22486	0	0	0	0	1.28001	0	0	0	0
Gm22442	0	0	0	0	1.26564	0	0	0	0
Hectd2os	0	0	0	0	1.26298	0	0	0	0
Gm25788	0	0	0	0	1.25609	0	0	0	0
Scarna6	2	0	0	0	1.24825	8	0	4	0
Hsf2bp	0	0	0	0	1.24728	58	0	8	0
Rpl19-ps11	0	0	0	0	1.24109	0	0	0	0
Rps27rt	0	0	0	0	1.23367	0	0	0	0
Rpl5	0	0	0	0	1.2331	0	0	0	0
Timm23	0	0	0	0	1.2312	1	0	0	0
Tex12	0	0	0	0	1.23002	0	0	0	0
Sult2a7	0	0	0	0	1.21871	0	0	0	0
Bri3	0	0	0	0	1.20913	0	0	0	0
Gm47544	0	0	0	0	1.20489	0	0	0	0
Rpl36a-ps2	0	0	0	0	1.20307	0	0	0	0
Gpx4	2	0	4	0	1.20153	26	0	27	0
Oaz1	1	0	0	0	1.18026	52	0	0	0
4632427E13Rik	0	0	0	0	1.17742	2	0	0	0
Gm4045	0	0	0	0	1.1436	0	0	0	0
Gt(ROSA)26Sor	0	2	0	0	1.13885	0	0	0	0
Serpinb1a	0	0	0	0	1.13372	2	0	0	0
Polr2k	0	0	3	0	1.12927	11	0	0	0
Gm43449	0	0	0	0	1.12755	0	0	0	0
Gm12265	0	0	0	0	1.12437	5	0	0	0
Gm29216	0	0	0	0	1.1225	0	0	0	0
Uba52	0	0	0	0	1.12096	2	0	33	0
Immp1l	0	0	0	0	1.11687	0	0	0	0
mt-Co3	0	0	0	0	1.11498	0	0	0	0
A330069E16Rik	5	0	0	0	1.11422	1	0	3	0
Tomm5	13	0	0	0	1.11421	0	0	1	0
Kcnq1ot1	0	0	0	0	1.11228	0	0	0	0
C730002L08Rik	0	0	0	0	1.11068	0	0	0	0
Snord104	3	0	0	0	1.1099	7	0	0	0
Oaz1-ps	0	0	0	0	1.10983	0	0	0	0
Rps16	0	0	0	0	1.10583	26	0	35	0
Hist1h4b	0	0	0	0	1.10101	2	0	0	0
Gm6170	0	0	0	0	1.09243	0	0	0	0
Dnajc15	0	0	0	0	1.08924	0	0	9	0
Acnat2	0	0	0	0	1.08889	0	0	0	0
Gm25835	0	0	0	0	1.08337	0	0	0	0
Gm12231	0	0	0	0	1.0783	38	0	11	0
Gm36435	0	0	0	0	1.07598	0	0	0	0
Rpl27a	0	0	0	0	1.07576	5	0	0	0
Rpl41	1	0	0	0	1.07567	5	0	0	0
Rn7sk	0	0	0	0	1.0728	0	0	0	0
mt-Rnr2	0	0	0	0	1.06714	0	0	0	0
Gm6863	0	0	0	0	1.06192	0	0	0	0
Rpl35	3	2	0	0	1.06087	0	0	0	0
Wfdc2	0	0	0	0	1.05519	3	0	0	0
mt-Tp	0	0	0	0	1.04845	0	0	0	0
Mrpl23	0	0	0	0	1.04713	46	0	9	0
Znf41-ps	0	0	0	0	1.0462	0	0	0	0
Rnf125	0	0	0	0	1.03838	5	0	0	0
Gm37336	0	0	0	0	1.03823	0	0	0	0
Slc17a8	0	0	0	0	1.03683	0	0	0	0
Gm22422	0	0	0	0	1.03546	0	0	0	0
Gm10736	0	0	0	0	1.03258	0	0	0	0
Ran	0	0	0	0	1.03237	1	0	0	0
Lonrf3	0	0	0	0	1.03233	0	0	0	0
Znhit3	0	0	0	0	1.03114	2	0	0	0
Rps24	0	0	0	0	1.03003	9	0	0	0
Trhde	3	0	3	0	1.02954	0	0	0	0
Gm13021	0	0	0	0	1.02193	0	0	0	0
Gm25117	0	0	0	0	1.02112	0	0	0	0
L3hypdh	0	0	0	0	1.01996	0	0	0	0
Rpl19	6	0	0	0	1.01974	19	0	10	0
B3galnt1	0	0	0	0	1.01716	2	0	0	0
Chrna1os	0	0	0	0	1.01646	0	0	0	0
Bloc1s2	10	0	0	0	1.01426	0	0	8	0
Pfdn5	10	0	0	0	1.01031	0	0	0	0
Gm36028	0	0	0	0	1.00766	0	0	0	0
Rpain	0	0	0	0	1.00341	3	0	0	0
Gm34654	0	0	0	0	1.00277	0	0	0	0
Pdcd10	0	0	0	0	1.00055	0	0	0	0
Rps8	0	0	0	0	0.997611	0	0	0	0
Gm13456	0	0	0	0	0.996503	0	0	0	0
Gm34777	0	0	0	0	0.993751	0	0	0	0
Mir99ahg	0	0	0	0	0.990216	0	0	0	0
Leap2	0	0	0	0	0.990012	0	0	0	0
AC135964.2	0	0	0	0	0.987432	0	0	0	0
Cib2	0	0	0	0	0.98723	0	0	2	0
Platr4	0	0	0	0	0.98613	0	0	0	0
5033403H07Rik	0	0	0	0	0.98259	0	0	0	0
Usmg5	0	0	0	0	0.981374	0	0	4	0
Fcor	0	0	0	0	0.979874	0	0	0	0
Rpl11	0	0	0	0	0.979293	2	0	0	0
Car8	0	0	0	0	0.978652	4	0	0	0
1110065P20Rik	0	0	0	0	0.973242	0	0	0	0
Gm44744	0	0	0	0	0.97125	0	0	0	0
6720427I07Rik	0	0	0	0	0.968872	0	0	0	0
Acyp2	0	0	0	0	0.963765	4	0	1	0
Mir22hg	0	0	0	0	0.960085	0	0	0	0
BC002163	3	0	1	0	0.959543	2	0	0	0
Mrps33	0	0	0	0	0.955152	0	0	0	0
Rpl35a	0	0	0	0	0.954354	15	5	7	0
Mrpl14	2	0	0	0	0.952094	7	0	4	0
Mrpl23-ps1	0	0	0	0	0.951102	0	0	0	0
2900076A07Rik	0	0	0	0	0.950492	9	0	0	0
Spag4	0	0	0	0	0.94995	3	0	0	0
CT010467.1	0	0	0	0	0.948109	0	0	0	0
Hspe1	14	0	7	0	0.948013	65	0	0	0
Rpa3	0	0	0	0	0.945505	0	0	0	0
2410006H16Rik	1	0	0	0	0.940893	0	0	12	0
Sft2d1	0	0	0	0	0.938202	0	0	0	0
Ppih	0	0	0	0	0.936503	8	0	0	0
Rps7	0	0	0	0	0.933789	0	0	0	0
Btf3	0	0	0	0	0.933353	0	0	0	0
Gabarapl2	0	0	0	0	0.932835	2	0	0	0
Snrpd1	0	0	0	0	0.932415	0	0	0	0
Gm22973	0	0	0	0	0.932319	0	0	0	0
4430402I18Rik	4	0	1	0	0.928492	2	0	0	0
Nsa2	0	0	0	0	0.927758	8	0	13	0
Ccl27a	0	0	0	0	0.92622	0	0	6	0
Ndufaf2	0	0	0	0	0.926034	0	0	0	0
Ccdc115	0	0	0	0	0.923895	10	0	0	0
Zfp931	0	0	0	0	0.919319	0	0	0	0
Ggact	0	0	0	0	0.919052	0	0	0	0
Ccdc162	0	0	0	0	0.918354	0	0	0	0
Tmed2	0	0	0	0	0.918066	18	0	2	0
A930001C03Rik	0	0	0	0	0.917913	4	1	0	0
Cd59a	0	0	0	0	0.917479	0	0	11	0
Serpina12	3	1	0	0	0.917178	1	0	2	0
Rps12	5	0	0	0	0.912004	0	0	0	0
Gm7331	0	0	0	0	0.910052	0	0	0	0
Vmo1	0	0	0	0	0.908679	0	0	0	0
Kbtbd3	7	0	0	0	0.908309	0	0	0	0
Man2c1os	0	0	0	0	0.904461	0	0	0	0
Fau	0	0	0	0	0.900001	10	1	2	0
Rpl36	1	0	5	0	0.899193	7	9	3	0
Acyp1	14	0	14	0	0.89696	22	0	0	0
Npm3	0	0	0	0	0.89621	32	0	0	0
Ighm	0	0	0	0	0.895455	7	0	0	0
mt-Ta	0	0	0	0	0.895258	0	0	0	0
Rpl34	0	1	0	0	0.894229	0	0	0	0
Gm6767	0	0	0	0	0.887901	0	0	0	0
Gm7609	0	0	0	0	0.887646	0	0	0	0
Ap3s1	0	0	0	0	0.885401	13	0	8	0
Gm5869	0	0	0	0	0.885096	0	0	0	0
C330013E15Rik	0	0	0	0	0.883307	0	0	0	0
Rnf7	0	0	1	0	0.882316	0	0	1	0
Atp6v1g1	0	0	0	0	0.882188	5	20	0	0
Gm8355	0	0	0	0	0.88122	0	0	0	0
Angptl8	0	0	0	0	0.874101	0	0	0	0
Tma7	0	0	0	0	0.872881	0	0	0	0
Wfdc17	0	0	0	0	0.866192	0	0	0	0
Cdh2	7	0	0	0	0.865584	0	0	0	0
Gm8186	0	0	0	0	0.863876	1	0	0	0
Cops9	0	0	0	0	0.863404	0	0	0	0
Zc3h6	0	0	0	0	0.862864	12	0	6	0
Rps13-ps2	0	0	0	0	0.861493	0	0	0	0
Chchd1	0	0	0	0	0.861295	21	0	0	0
Rps6	3	0	0	0	0.861046	41	0	12	0
Gm26448	0	0	0	0	0.859787	0	0	0	0
BC051226	0	0	0	0	0.855332	1	0	0	0
Commd6	3	0	0	0	0.852533	1	0	0	0
Rps13	0	0	0	0	0.851676	20	0	15	0
Gm43189	0	0	0	0	0.847629	0	0	0	0
Hnf4aos	0	0	0	0	0.846451	0	0	0	0
Eef1a1	0	0	0	0	0.844438	0	0	0	0
Guk1	0	0	0	0	0.844202	1	0	0	0
Rps23	0	0	0	0	0.843299	2	0	0	0
Pop5	0	0	0	0	0.843183	3	0	1	0
Rps16-ps2	0	0	0	0	0.839611	0	0	0	0
Snrnp27	0	0	0	0	0.837604	8	0	0	0
Pcbd2	0	0	0	0	0.836292	1	0	0	0
Irx1	13	0	0	0	0.835922	0	0	0	0
Asic5	0	0	0	0	0.835655	0	0	0	0
Psmb5	0	0	3	0	0.835593	0	13	0	0
Igkc	0	0	0	0	0.832482	0	0	0	0
Zfas1	0	0	0	0	0.830544	0	0	0	0
2010001A14Rik	0	0	0	0	0.829086	0	0	0	0
9430038I01Rik	0	0	0	0	0.828678	0	0	0	0
5033421B08Rik	0	0	0	0	0.82804	0	0	0	0
Gm16062	0	0	0	0	0.827569	10	0	2	0
Obp2a	0	0	0	0	0.827264	0	0	0	0
Polr2l	0	0	0	0	0.823456	7	0	0	0
Kbtbd12	0	0	0	0	0.822134	1	0	0	0
A330023F24Rik	0	0	0	0	0.821955	6	0	0	0
Rps25-ps1	0	0	0	0	0.821329	0	0	0	0
Gm15590	0	0	0	0	0.820165	14	10	0	0
Mthfsl	0	0	0	0	0.820156	0	0	0	0
Camk1	0	1	0	0	0.819601	0	0	0	0
Lrtm1	0	0	0	0	0.818924	0	0	0	0
Slc33a1	0	0	0	0	0.817823	0	0	0	0
Rps14	0	0	0	0	0.817518	53	0	51	0
Gm15417	0	0	0	0	0.816079	5	0	0	0
9330162012Rik	0	0	0	0	0.815614	0	0	0	0
Pigyl	0	0	0	0	0.81457	0	0	0	0
Cyp2b9	0	0	0	0	0.812079	0	0	0	0
Gm8566	0	0	0	0	0.811891	18	0	0	0
Mpc2	0	0	0	0	0.811819	0	0	0	0
Rps19	1	0	0	0	0.809893	18	19	17	0
Pebp1	0	0	0	0	0.807516	0	0	0	0
Cebpzos	0	0	0	0	0.806168	0	0	0	0
Scarna2	4	0	1	0	0.804425	7	0	1	0
Tmem160	0	0	0	0	0.803664	33	0	20	0
Gm6472	0	0	0	0	0.800739	0	0	0	0
Mrpl41	0	0	0	0	0.798998	11	1	4	0
Mrpl28	0	0	0	0	0.797321	1	0	0	0
Rad51b	0	0	0	0	0.796669	0	0	0	0
Tomm20	0	0	0	0	0.795809	0	0	9	0
9030616G12Rik	0	0	0	0	0.795721	0	0	0	0
Prorsd1	0	0	0	0	0.795319	3	0	0	0
Rn7s1	0	0	0	0	0.79526	0	0	0	0
2810001G20Rik	0	0	0	0	0.79416	0	0	0	0
Rps9	0	0	0	0	0.793557	7	0	0	0
2510046G10Rik	0	0	0	0	0.792943	0	0	0	0
Cd9	0	0	0	0	0.791038	8	0	9	0
Rplp0	0	0	0	0	0.79079	1	0	0	0
Slc22a27	0	0	0	0	0.787801	3	0	0	0
Psma7	0	0	0	0	0.786648	0	0	0	0
Cox7c	0	0	0	0	0.785298	0	0	0	0
Gm25360	0	0	0	0	0.784224	0	0	0	0
Zfp53	0	0	0	0	0.783713	0	0	0	0
Zfp982	0	0	0	0	0.780258	0	0	0	0
Serf1	0	0	0	0	0.778569	0	0	0	0
Gm2000	0	0	0	0	0.778514	15	0	2	0
Gm35986	0	0	0	0	0.778042	0	0	0	0
Gtf2a2	0	0	0	0	0.776018	15	0	1	0
Gm40787	0	0	0	0	0.773768	0	0	0	0
C1d	0	0	0	0	0.773523	0	0	0	0
4930524O07Rik	2	0	0	0	0.771229	0	1	0	0
Plekhj1	1	0	0	0	0.768546	43	0	1	0
Rps18	0	0	0	0	0.768377	18	0	7	0
Spc24	0	0	0	0	0.767938	13	0	3	0
Gm25291	0	0	0	0	0.767479	0	0	0	0
Ppp1r35	0	0	0	0	0.764605	21	0	13	0
Blvrb	0	0	0	0	0.764185	45	0	0	0
Gm42067	0	0	0	0	0.764062	0	0	0	0
Ccdc107	0	0	0	0	0.763067	0	0	9	0
Gm11423	0	0	0	0	0.761847	2	2	9	0
CT027991.1	0	0	0	0	0.761022	0	0	0	0
Mup20	0	0	0	0	0.76052	0	0	0	0
Ift20	0	0	0	0	0.759709	0	0	0	0
A430005L14Rik	0	0	0	0	0.758838	0	0	0	0
Mpc1	0	0	0	0	0.758477	0	0	0	0
Pdk4	0	0	0	0	0.755307	1	0	0	0
Gm4285	0	0	4	0	0.755236	0	0	0	0
Triap1	0	0	0	0	0.754979	1	0	0	0
Mapk15	0	0	0	0	0.752543	1	0	0	0
Dgcr6	4	0	0	0	0.752483	3	0	0	0
Oxld1	0	0	0	0	0.752193	0	0	0	0
Selenof	0	0	0	0	0.751588	0	0	0	0
Gm12909	0	0	0	0	0.751355	0	0	0	0
9630013D21Rik	0	0	0	0	0.751223	3	0	0	0
Taf1d	0	0	0	0	0.751183	0	0	0	0
Rpl32	0	0	5	0	0.748651	20	0	22	0
Rab17	0	0	0	0	0.74859	0	0	3	0
Atp6v0b	24	0	18	0	0.748484	0	0	0	0
Atp5e	0	0	0	0	0.745885	3	0	0	0
Olfr1033	1	0	0	0	0.745567	0	0	0	0
Ppp1r2	0	0	0	0	0.743569	16	0	11	0
Tmem256	0	0	0	0	0.742953	0	0	0	0
2210039B01Rik	0	0	0	0	0.742292	0	0	0	0
C330021F23Rik	0	0	0	0	0.740133	0	0	0	0
Dtymk	0	0	0	0	0.738257	3	0	0	0
Med21	0	0	0	0	0.736805	2	0	0	0
Arrdc3	0	0	0	0	0.734998	0	0	0	0
Gm11992	0	0	0	0	0.734928	5	0	0	0
Snhg14	0	0	0	0	0.73401	0	0	0	0
Ptges3	1	0	0	0	0.733543	3	0	0	0
Fopnl	0	0	0	0	0.733052	0	0	0	0
Khk	0	0	0	0	0.733007	2	0	0	0
Rwdd1	0	0	0	0	0.732169	0	0	0	0
Commd2	0	0	0	0	0.731791	2	0	0	0
Ciao2a	0	0	0	0	0.729775	0	0	0	0
Avpi1	2	2	0	0	0.72878	1	0	0	0
Dctpp1	0	0	0	0	0.728457	0	1	9	0
Gm40040	0	0	0	0	0.727587	0	0	0	0
Mreg	0	0	0	0	0.726749	0	0	0	0
Gm12481	0	0	0	0	0.725824	2	0	8	0
Mzt1	0	0	0	0	0.725522	0	0	0	0
Hyi	18	0	16	0	0.725129	0	0	0	0
Rps15	3	0	4	0	0.725047	43	0	23	0
Zfyve21	4	0	0	0	0.724214	0	0	0	0
Fahd2a	0	0	0	0	0.724137	12	0	0	0
Rpl28-ps1	0	0	0	0	0.722062	0	0	0	0
Gm31583	0	0	0	0	0.721659	0	0	0	0
Krt10	0	0	0	0	0.721642	0	0	0	0
Gdf15	0	0	0	0	0.721227	1	0	26	0
Gm17196	0	0	0	0	0.719485	0	0	0	0
Timm13	1	0	0	0	0.71895	37	0	0	0
Hist1h4c	0	0	0	0	0.718626	1	0	0	0
Phb	4	0	0	0	0.718536	0	0	0	0
Rps3	0	0	0	0	0.718356	8	0	0	0
Neat1	0	0	0	0	0.718137	0	0	1	0
Pld6	0	0	0	0	0.717884	11	0	3	0
Pgm5	0	0	0	0	0.717293	0	0	0	0
5930430L01Rik	0	0	0	0	0.716345	0	0	0	0
Ppil1	0	0	0	0	0.716206	11	20	8	0
Pcnp	7	0	3	0	0.715497	6	0	0	0
Tmem14c	0	0	0	0	0.715231	19	0	0	0
Cyp2j9	0	0	0	0	0.714719	0	0	0	0
Gm12338	0	0	0	0	0.712661	1	55	0	0
Akr1c20	0	0	1	0	0.711283	0	0	0	0
D130043K22Rik	0	0	0	0	0.710652	0	0	0	0
Fbxw9	0	0	0	0	0.709502	0	0	0	0
Gm47465	0	0	0	0	0.708138	0	0	0	0
AC151289.1	0	0	0	0	0.708099	0	0	0	0
Malat1	0	0	0	0	0.706714	0	0	0	0
Cry1	0	0	6	0	0.704497	2	0	0	0
Pts	0	0	0	0	0.703452	3	0	0	0
Ppcs	0	0	0	0	0.702551	9	0	0	0
Lncbate1	0	0	0	0	0.702294	0	0	0	0
Crls1	0	0	0	0	0.701742	10	0	0	0
Ces1d	18	0	20	0	0.701686	3	0	0	0
Sms	0	0	0	0	0.700891	0	0	0	0
Tmem141	0	0	0	0	0.70075	2	2	0	0
Ndufaf6	0	0	0	0	0.699164	0	0	0	0
Ccdc122	0	0	2	0	0.698576	0	0	0	0
Mrpl46	0	0	0	0	0.696636	0	0	0	0
Nit2	0	0	55	0	0.696414	14	0	1	0
Hax1	0	0	0	0	0.696043	1	0	0	0
Fitm1	0	0	0	0	0.695654	0	0	7	0
Pin4	0	0	0	0	0.695547	2	0	0	0
Rpl10a	2	0	0	0	0.694884	140	0	33	0
D630033O11Rik	0	0	0	0	0.694537	0	0	0	0
Zap70	0	0	0	0	0.69248	15	0	9	0
S100a1	0	0	0	0	0.691732	20	0	0	0
Rps27a	0	0	0	0	0.691174	4	0	0	0
4930522L14Rik	0	0	0	0	0.69115	0	0	0	0
Anapc11	0	0	1	0	0.690597	0	10	0	0
4732419C18Rik	0	0	0	0	0.690205	0	0	0	0
Fam241b	0	0	0	0	0.68997	0	0	0	0
Serpina7	0	0	0	0	0.689889	0	0	0	0
Gm14418	0	0	0	0	0.688915	0	0	0	0
Gm20522	0	0	0	0	0.688038	0	0	6	0
1810032O08Rik	0	0	2	0	0.684959	9	0	3	0
Uqcr11	2	0	4	0	0.684197	38	0	15	0
E030030I06Rik	0	0	0	0	0.68283	2	0	0	0
Mthfd2l	0	0	0	0	0.682515	0	0	0	0
Hist1h4d	0	0	0	0	0.681842	0	0	0	0
Psmd10	0	0	0	0	0.681561	0	0	0	0
Pam16	0	0	0	0	0.679425	15	0	0	0
Zfand4	0	0	0	0	0.677505	0	0	0	0
Bhmt-ps1	0	0	0	0	0.677409	0	0	0	0
Tmed1	0	0	2	0	0.676729	27	0	11	0
Plcxd1	0	0	0	0	0.676657	1	0	0	0
Mdp1	2	0	0	0	0.676606	0	0	10	0
Gm13394	3	0	1	0	0.676479	0	0	0	0
Aqp8	0	0	0	0	0.676421	0	0	0	0
2610306M01Rik	0	0	0	0	0.676179	0	0	0	0
Dkk4	0	0	0	0	0.675742	0	0	0	0
Acss3	4	0	0	0	0.674644	0	0	0	0
Gm10275	0	0	0	0	0.674533	0	0	0	0
Mindy3	0	0	0	0	0.674278	0	0	0	0
AC132455.2	0	0	0	0	0.673613	0	0	0	0
1600020E01Rik	0	0	0	0	0.672315	0	0	0	0
Stard3nl	0	0	0	0	0.671889	0	0	3	0
Cyp2d40	0	0	0	0	0.671304	0	0	0	0
Hist1h1e	0	0	0	0	0.671121	0	0	0	0
Celsr1	2	0	0	0	0.670019	46	0	8	0
Gstp2	0	0	0	0	0.669905	3	2	0	0
Atp6v1f	6	0	2	0	0.668385	3	0	0	0
Bola1	0	0	0	0	0.66835	12	0	0	0
Gm45091	0	0	0	0	0.667052	0	0	0	0
Psph	5	3	0	0	0.666727	5	0	0	0
Lypla1	0	0	0	0	0.666535	0	0	1	0
Naca	1	0	1	0	0.666006	3	0	0	0
Plekhb1	0	0	6	0	0.665918	4	0	14	0
Zfp872	0	0	0	0	0.665877	0	0	0	0
Lncpint	0	0	0	0	0.665473	0	0	0	0
Sdhaf1	0	0	0	0	0.664502	0	0	0	0
Fam89a	0	0	0	0	0.664064	0	0	0	0
H2afj	0	0	0	0	0.663964	23	1	36	0
A230050P20Rik	0	0	0	0	0.663948	22	0	0	0
Rpl6	0	0	0	0	0.663744	4	0	7	0
Arl4a	0	0	0	0	0.66373	1	0	0	0
Srgap3	0	3	0	0	0.663096	0	0	0	0
Mrpl57	0	0	0	0	0.660615	0	0	0	0
Gm12166	0	0	0	0	0.659185	0	0	0	0
Uck1	0	0	0	0	0.658981	6	0	9	0
Serf2	0	0	0	0	0.658589	0	0	0	0
Eif2s2	0	0	6	0	0.657902	3	0	0	0
Gm32063	0	0	0	0	0.657341	0	0	0	0
Rpl10a-ps1	0	0	0	0	0.656712	0	0	0	0
Tmem243	0	0	0	0	0.656661	0	0	0	0
Epb41l4aos	0	0	0	0	0.656366	0	0	0	0
Rpl13	5	0	0	0	0.656317	4	0	0	0
Cd207	0	0	0	0	0.656151	0	0	0	0
Rps21	1	0	0	0	0.655897	0	0	0	0
Rps27l	0	0	0	0	0.654684	27	0	0	0
Mup-ps13	0	0	0	0	0.6546	0	0	0	0
Atp5h	16	13	0	0	0.653875	1	0	11	0
Iqcg	0	0	0	0	0.653263	4	0	0	0
Gm13340	0	0	0	0	0.652858	18	0	2	0
Mrps36	0	0	0	0	0.652788	0	0	0	0
Fam213b	0	0	0	0	0.652469	0	0	0	0
Ccng2	0	0	0	0	0.65229	8	0	0	0
Rab24	0	0	0	0	0.65221	1	0	0	0
Gm5617	0	0	10	0	0.652158	58	0	7	0
Snrpg	0	0	0	0	0.651252	3	0	0	0
Cox4i1	0	0	0	0	0.650923	9	2	0	0
Gm10095	0	0	0	0	0.649881	0	0	0	0
Coa6	0	0	0	0	0.649219	0	0	0	0
Chchd2-ps	0	0	0	0	0.648884	0	0	0	0
Htatip2	0	0	0	0	0.648573	17	0	0	0
Pole4	0	0	0	0	0.648519	44	0	0	0
1110028F11Rik	0	0	0	0	0.646466	0	0	0	0
Ormdl1	0	0	0	0	0.64316	0	0	1	0
Tpt1-ps3	0	0	0	0	0.642834	0	0	0	0
0610031O16Rik	0	0	0	0	0.642596	0	0	0	0
Mien1	0	0	0	0	0.642416	0	0	0	0
Ndufs6	0	0	0	0	0.642234	0	0	0	0
Mrpl22	0	0	0	0	0.641879	0	0	0	0
Ptpn18	0	0	0	0	0.64177	12	0	0	0
Gm9892	0	0	0	0	0.641083	0	0	0	0
Eif4a2	1	0	0	0	0.641046	0	0	0	0
Uqcr10	3	0	0	0	0.640536	3	0	0	0
Caln1	0	0	0	0	0.640435	0	0	0	0
Map3k15	0	0	0	0	0.640354	0	0	0	0
Mthfr	0	0	0	0	0.640323	0	0	0	0
Fbxl5	0	0	0	0	0.640047	0	0	1	0
Gnpnat1	0	0	10	0	0.639589	2	0	0	0
Gm31522	0	0	0	0	0.63925	0	0	0	0
Mrnip	0	0	0	0	0.639161	0	0	0	0
Snord118	0	0	0	0	0.638833	0	0	0	0
Cks2	0	0	0	0	0.638815	28	0	0	0
Rack1	0	0	0	0	0.638448	0	0	0	0
Gm13657	0	1	0	0	0.637219	1	0	0	0
Gm6652	0	0	0	0	0.636755	0	0	0	0
Rps25	1	0	2	0	0.636404	2	0	0	0
Gm9385	0	0	0	0	0.635386	4	0	0	0
Gng11	1	0	0	0	0.635078	0	0	0	0
1810008I18Rik	0	0	0	0	0.634795	0	0	0	0
Kcnk10	0	0	0	0	0.634567	0	0	0	0
Ndufb8	1	0	0	0	0.633972	0	0	11	0
2010320M18Rik	0	0	0	0	0.633921	0	0	0	0
Cnih1	0	0	0	0	0.633829	0	0	0	0
2510002D24Rik	0	0	0	0	0.63335	0	0	0	0
Nudcd2	0	0	0	0	0.631452	0	0	0	0
Mgmt	0	0	0	0	0.631334	0	0	0	0
Adh4	0	0	7	0	0.631148	0	0	0	0
Ndufb7	0	0	0	0	0.631073	0	0	0	0
2810410L24Rik	0	0	8	0	0.628868	2	4	1	0
Rpl14	10	0	0	0	0.628077	1	0	0	0
Prdx2	0	0	0	0	0.627729	1	0	0	0
Eef1b2	0	0	0	0	0.626997	0	0	0	0
Mpc1-ps	0	0	0	0	0.626631	0	0	0	0
Tmem17	0	0	0	0	0.626453	9	0	0	0
Kif5a	0	0	1	0	0.626407	10	0	0	0
Bcl7c	0	0	0	0	0.626375	2	15	0	0
Rasl2-9	0	0	0	0	0.626227	0	0	0	0
Gadd45b	0	0	0	0	0.625892	19	0	0	0
H2afv	0	1	1	0	0.625445	7	0	7	0
A230072C01Rik	0	0	0	0	0.624969	9	0	0	0
Alkbh7	0	0	0	0	0.624821	1	0	13	0
Zfp958	0	0	0	0	0.623405	0	0	0	0
Akr1d1	0	0	0	0	0.623315	7	0	0	0
Tmem126a	0	0	0	0	0.622459	2	0	2	0
Saysd1	0	0	0	0	0.620969	0	0	0	0
Gm26461	0	0	0	0	0.620847	0	0	0	0
Agbl3	0	0	0	0	0.620345	1	0	0	0
G0s2	0	0	23	0	0.620337	0	0	0	0
Fabp2	0	0	0	0	0.620307	0	0	0	0
Selenok	0	0	0	0	0.62001	0	0	0	0
Eif3j1	0	0	0	0	0.619994	0	0	0	0
Rpl37a	0	0	0	0	0.619981	7	0	3	0
Snrpd2	1	0	0	0	0.619891	7	0	0	0
Snrnp25	0	0	0	0	0.61978	3	0	0	0
Gtf3a	0	0	0	0	0.619591	0	0	0	0
Chpt1	0	0	0	0	0.61785	2	0	0	0
Gm2788	2	0	0	0	0.61684	0	6	0	0
Gm16731	0	0	0	0	0.616787	0	0	0	0
Eif3h	0	0	0	0	0.616684	0	0	5	0
Cox19	0	0	0	0	0.616504	8	0	7	0
Rbm3	0	0	0	0	0.615905	1	0	0	0
Ric3	0	0	0	0	0.615673	0	0	0	0
Pabpn1	0	0	13	0	0.615368	0	5	0	0
Psma5	9	0	2	0	0.615336	5	1	0	0
Osbpl8	2	0	0	0	0.614712	2	0	0	0
Cox14	0	0	0	0	0.6146	0	0	0	0
Tyw5	0	0	0	0	0.612529	0	0	0	0
Gclc	0	0	0	0	0.612515	0	0	0	0
Gm31333	0	0	0	0	0.611897	0	0	0	0
Coq2	1	0	0	0	0.611306	17	0	31	0
Rps11	8	0	0	0	0.610923	9	0	0	0
A430046D13Rik	1	0	0	0	0.610584	0	0	0	0
BC025446	0	0	0	0	0.610048	0	0	9	0
Gchfr	0	0	0	0	0.609904	0	0	0	0
Hmgb1	0	0	0	0	0.609884	17	0	7	0
1110020A21Rik	0	0	0	0	0.609566	0	0	0	0
Uqcc2	0	0	0	0	0.608823	0	0	0	0
Nadk2	0	0	0	0	0.608823	0	0	0	0
Rpl3	0	0	0	0	0.608074	46	0	46	0
Crygn	0	0	0	0	0.607785	8	0	0	0
Psma3	1	0	1	0	0.607134	6	0	0	0
Dnajc19	0	0	0	0	0.606723	0	0	0	0
Gm11967	0	0	0	0	0.606483	0	0	0	0
Gm25395	0	0	0	0	0.606418	0	0	0	0
Gpn3	0	0	0	0	0.606088	39	0	0	0
Selenop	0	0	0	0	0.605921	0	0	0	0
Insig1	0	0	7	0	0.605438	0	0	0	0
Auh	0	0	0	0	0.604035	6	0	0	0
2010315B03Rik	0	0	0	0	0.603946	0	0	0	0
Cyp2a22	0	0	0	0	0.601877	5	0	0	0
Zfp606	0	0	0	0	0.601839	0	0	0	0
Nr1i3	0	0	0	0	0.601578	4	0	1	0
2810013P06Rik	0	0	0	0	0.60155	0	0	0	0
Vbp1	0	0	0	0	0.600968	0	0	0	0
Gm48633	0	0	0	0	0.600828	0	0	0	0
Usf1	0	0	0	0	0.600573	8	0	7	0
Lag3	0	0	5	0	0.599877	0	0	0	0
Mup3	0	0	0	0	0.599532	0	0	0	0
Gm34667	0	0	0	0	0.598911	0	0	0	0
Gm13522	0	0	0	0	0.598645	0	0	0	0
Pet100	0	0	0	0	0.598509	0	0	0	0
Aatk	0	0	13	0	0.598088	13	0	2	0
Tcta	11	0	0	0	0.597727	1	0	1	0
Pm20d2	0	0	0	0	0.59675	0	0	0	0
Rmdn1	0	0	0	0	0.596623	0	0	0	0
Gm11273	0	7	0	0	0.596533	0	0	9	0
Arntl	0	0	0	0	0.595546	19	0	0	0
Trpm7	1	0	0	0	0.594955	7	0	0	0
Fgd4	0	0	0	0	0.59478	0	0	0	0
Rps28	0	0	0	0	0.594743	14	0	2	0
Tmed10-ps	0	0	0	0	0.594721	0	0	0	0
Ildr2	0	0	0	0	0.594165	0	0	0	0
Chrac1	0	0	0	0	0.593937	119	0	21	0
Ndufaf5	0	0	0	0	0.593299	0	0	0	0
Hnf1aos1	0	0	0	0	0.593107	0	0	0	0
Cela1	4	0	0	0	0.592625	0	0	1	0
Mettl23	0	0	0	0	0.592076	0	0	0	0
Gm45338	0	0	0	0	0.59075	0	0	0	0
Hmgcl	0	0	0	0	0.590055	3	0	0	0
Hnrnpf	0	0	0	0	0.590039	0	0	0	0
Ccdc148	0	0	0	0	0.589427	0	0	0	0
Sod1	0	0	0	0	0.588803	29	0	0	0
Mesd	0	0	0	0	0.588528	0	0	0	0
Tmem242	0	0	0	0	0.588121	0	0	0	0
Pura	0	0	0	0	0.587832	0	30	0	0
Dusp12	0	0	0	0	0.587671	14	0	7	0
Trub2	0	0	0	0	0.587591	29	0	0	0
Rpl31	0	0	0	0	0.586632	30	0	0	0
Pafah1b3	0	0	0	0	0.585328	20	2	17	0
Mrpl33	0	0	0	0	0.585242	29	0	0	0
Arhgap20	1	0	0	0	0	0	0	0	0
Mthfsd	0	0	0	0	0	4	0	0	0
Cdca3	0	0	6	0	0	2	0	1	0
Gm5970	0	0	0	0	0	0	0	1	0
Nfs1	0	0	0	0	0	7	0	0	0
Gm11954	0	0	0	0	0	1	0	0	0
Fgd6	5	0	0	0	0	1	0	0	0
Ubac2	0	0	0	0	0	12	1	0	0
Arih2	11	0	0	0	0	3	0	0	0
Gm9840	0	0	0	0	0	0	0	1	0
Hsd3b7	0	0	0	0	0	2	14	0	0
Galntl1	0	0	0	0	0	8	0	1	0
Gm7613	0	0	0	0	0	0	5	0	0
Gm17195	0	0	0	0	0	2	0	0	0
Gm20529	1	0	0	0	0	0	0	1	0
Tmem213	0	0	0	0	0	8	0	0	0
Vat1l	2	0	0	0	0	0	0	0	0
Aff1	0	0	0	0	0	32	0	14	0
Tfam	0	0	0	0	0	3	0	0	0
Slc4a11	0	0	0	0	0	3	0	0	0
Gm11737	0	0	0	0	0	2	7	14	0
Prss36	0	0	0	0	0	4	10	0	0
Kcnd3	1	0	0	0	0	0	0	0	0
Gm13447	0	0	0	0	0	5	0	0	0
Gm16799	0	0	0	0	0	1	0	0	0
Gm16046	0	0	0	0	0	3	0	0	0
4933433C11Rik	0	0	0	0	0	5	2	2	0
Gm13835	0	0	0	0	0	2	0	13	0
Gm14521	0	0	0	0	0	1	0	0	0
Lphn2	0	0	0	0	0	0	2	0	0
Ap1s1	0	0	0	0	0	2	0	0	0
Zfp36l1	0	0	0	0	0	6	0	1	0
Arl10	0	0	0	0	0	1	0	0	0
Gm8894	0	0	1	0	0	0	0	0	0
Mgat4a	0	0	0	0	0	8	0	0	0
Shc3	0	0	0	0	0	5	0	0	0
Il20ra	0	0	0	0	0	10	0	0	0
Gm10291	0	0	0	0	0	6	0	3	0
Olfr1036	1	0	0	0	0	0	0	0	0
Gm5054	0	0	0	0	0	12	0	5	0
Nmnat1	0	0	0	0	0	3	0	10	0
1700042G07Rik	0	0	0	0	0	0	5	0	0
Mrps15	2	0	0	0	0	13	4	0	0
Ddt	0	0	0	0	0	3	0	0	0
Prkcz	0	0	0	0	0	1	0	0	0
Fam166b	0	0	0	0	0	0	0	7	0
Add2	0	0	0	0	0	1	0	0	0
Foxh1	6	0	0	0	0	10	0	0	0
Pigs	0	0	0	0	0	1	0	0	0
Gm17590	0	0	0	0	0	5	0	0	0
Akap5	3	0	1	0	0	0	0	0	0
Ecm2	0	0	0	0	0	0	0	1	0
4933424B01Rik	0	0	0	0	0	2	0	0	0
Gm9154	1	0	0	0	0	1	0	0	0
5830444B04Rik	0	0	0	0	0	1	0	0	0
BB218582	1	0	0	0	0	0	0	0	0
Ppib	0	0	0	0	0	2	0	0	0
Mtag2	4	0	0	0	0	0	0	0	0
Scarna17	0	1	0	0	0	2	0	0	0
Atxn2	0	0	0	0	0	4	0	0	0
Gm4707	0	0	1	0	0	0	0	0	0
Ccny	0	0	0	0	0	11	0	0	0
Egflam	0	0	0	0	0	1	0	1	0
Gm11951	0	0	0	0	0	3	0	0	0
Mtx1	0	0	0	0	0	8	0	2	0
Il10	0	0	0	0	0	4	0	0	0
Zfp445	6	0	0	0	0	0	0	0	0
Gm13921	0	0	0	0	0	4	0	0	0
Hist1h3a	0	0	0	0	0	3	0	0	0
Gm17408	0	0	0	0	0	0	0	1	0
Gm14039	0	0	0	0	0	4	0	1	0
Elac1	6	0	2	0	0	10	0	0	0
Ager	1	0	0	0	0	5	0	5	0
Gab1	0	0	0	0	0	1	0	0	0
Cspp1	0	0	0	0	0	1	0	0	0
Vwa3b	0	0	0	0	0	4	0	2	0
Mmel1	0	0	0	0	0	1	0	0	0
Gramd2	0	0	0	0	0	0	3	0	0
Srek1	1	0	0	0	0	2	0	0	0
Slc6a6	0	0	0	0	0	13	0	0	0
Snord14d	0	0	0	0	0	1	0	1	0
Man2c1	0	0	6	0	0	14	0	0	0
4930588N13Rik	0	0	0	0	0	1	0	1	0
Shmt1	3	0	0	0	0	1	0	0	0
Gm11952	0	0	0	0	0	1	0	0	0
BC027231	0	0	0	0	0	0	0	2	0
Fkbp2	0	0	3	0	0	6	0	1	0
Cep97	14	0	3	0	0	21	0	0	0
1110038F14Rik	18	0	0	0	0	26	0	0	0
Pygl	0	0	0	0	0	1	0	0	0
Gm10604	0	0	0	0	0	1	0	0	0
Gm17549	1	0	0	0	0	14	0	1	0
Nip7	0	0	0	0	0	7	0	0	0
Zbtb32	0	0	0	0	0	1	0	0	0
Eif4a1	0	0	0	0	0	25	0	0	0
Ccnl1	0	0	0	0	0	17	0	0	0
Wbscr22	2	0	0	0	0	0	0	1	0
Gm17118	0	0	0	0	0	0	0	1	0
BC048609	0	0	0	0	0	0	0	1	0
4930548H24Rik	0	0	0	0	0	16	0	0	0
Safb2	1	0	1	0	0	0	0	2	0
Fam65a	5	0	5	0	0	4	0	4	0
Cd63	1	0	0	0	0	17	0	0	0
Bub3	2	0	0	0	0	1	0	0	0
E130003G02Rik	0	0	0	0	0	1	2	0	0
Ube2t	1	0	0	0	0	3	0	0	0
Sqstm1	3	0	0	0	0	1	0	0	0
Foxp3	0	0	0	0	0	4	0	0	0
Zfp821	0	0	0	0	0	5	0	0	0
Gm11462	0	0	0	0	0	10	6	0	0
Ncf1	0	0	0	0	0	18	0	0	0
Gm16565	0	0	0	0	0	0	0	2	0
Dmpk	4	0	0	0	0	10	0	0	0
Clec12b	0	0	0	0	0	5	0	1	0
Plekha8	0	0	0	0	0	1	6	2	0
Ambp	0	0	0	0	0	4	3	0	0
1700086O06Rik	0	0	0	0	0	0	0	6	0
Gm6749	0	0	0	0	0	1	0	0	0
Nudt5	0	0	0	0	0	3	0	0	0
Gnas	0	0	0	0	0	2	0	0	0
Pear1	0	0	0	0	0	1	0	0	0
2610528E23Rik	0	0	28	0	0	8	0	5	0
Islr2	6	0	0	0	0	0	0	0	0
Gm11974	0	0	0	0	0	3	0	3	0
Gm10120	1	0	0	0	0	0	0	0	0
Inpp5e	0	0	0	0	0	2	0	0	0
Ppa2	4	0	0	0	0	1	0	0	0
1700062I23Rik	0	0	0	0	0	5	0	0	0
Klrb1f	0	0	0	0	0	0	0	16	0
5031425E22Rik	2	0	0	0	0	0	0	0	0
Accn2	0	0	5	0	0	13	0	1	0
Ercc8	0	0	0	0	0	2	0	0	0
Fbxl15	0	0	0	0	0	5	0	4	0
Selm	0	0	0	0	0	7	0	0	0
Cpsf3l	0	0	0	0	0	3	2	0	0
Sirt2	0	0	0	0	0	32	0	8	0
Sertad4	0	0	7	0	0	0	0	0	0
2310030N02Rik	2	0	0	0	0	1	0	0	0
Gm6471	0	0	0	0	0	0	1	0	0
Kif5c	0	0	0	0	0	4	0	0	0
Rom1	0	0	3	0	0	0	0	20	0
Chrd	0	0	0	0	0	4	0	0	0
Zfyve20	0	0	0	0	0	3	0	0	0
Gm15502	0	0	0	0	0	5	0	3	0
Gm15598	4	0	0	0	0	11	0	2	0
Rtkn	0	0	0	0	0	24	0	0	0
Slc7a6	4	0	4	0	0	2	0	1	0
Fam20a	0	0	0	0	0	4	0	2	0
Ttc36	0	0	2	0	0	3	0	0	0
Tnr	0	0	0	0	0	3	0	0	0
Lmo7	4	0	0	0	0	1	0	0	0
Wnt5b	0	0	0	0	0	2	0	0	0
Trank1	0	0	0	0	0	2	0	2	0
Atpaf2	0	0	0	0	0	17	0	0	0
Dyrk2	0	0	0	0	0	2	2	0	0
Gnptab	0	0	0	0	0	5	0	0	0
AI846148	0	0	4	0	0	0	0	0	0
Men1	0	0	0	0	0	0	0	1	0
Nod2	0	0	0	0	0	18	0	18	0
Sox4	0	0	0	0	0	4	0	3	0
Six1	0	0	0	0	0	3	0	0	0
2310001K24Rik	0	0	0	0	0	1	0	3	0
Wapal	1	0	0	0	0	0	0	0	0
Lipt2	0	0	0	0	0	1	0	0	0
1700001O22Rik	0	0	0	0	0	37	0	1	0
Hexim2	0	0	0	0	0	25	0	2	0
Nfkbiz	14	0	3	0	0	24	0	0	0
Gm973	2	0	0	0	0	1	0	0	0
Gm12876	0	0	0	0	0	1	0	0	0
Ccdc9	0	0	0	0	0	33	0	29	0
Lypd4	0	0	0	0	0	1	9	1	0
Hmbs	0	0	0	0	0	1	0	0	0
Lpar5	0	0	4	0	0	0	0	1	0
Nfe2l2	0	3	0	0	0	10	0	0	0
D730003I15Rik	0	0	0	0	0	3	0	0	0
Fan1	0	0	0	0	0	3	0	0	0
Ccdc84	0	0	0	0	0	1	0	0	0
Cyp4f17	0	0	0	0	0	5	0	12	0
Lrmp	0	0	0	0	0	6	0	0	0
Gm10159	0	0	0	0	0	2	0	0	0
Gm12152	0	0	0	0	0	0	0	1	0
Gm13549	0	0	0	0	0	2	0	2	0
Prdm1	0	0	0	0	0	6	0	3	0
SNORD27	0	0	0	0	0	0	0	1	0
Nxph1	0	0	2	0	0	0	0	0	0
Sept11	0	0	0	0	0	19	0	0	0
Setmar	0	0	0	0	0	7	0	0	0
Tsnax	0	0	0	0	0	2	0	0	0
Sit1	0	0	0	0	0	0	0	8	0
4930571K23Rik	0	0	0	0	0	1	0	0	0
Hist4h4	0	0	0	0	0	10	1	21	0
Lrrc61	0	0	0	0	0	6	0	0	0
Luc7l2	0	0	2	0	0	2	0	6	0
Kctd13	0	0	0	0	0	0	0	1	0
Dtna	0	0	0	0	0	1	0	0	0
Fsd1l	0	0	0	0	0	4	0	0	0
Gm14316	0	0	0	0	0	2	0	0	0
Mdh1b	0	0	0	0	0	1	0	0	0
1700013G24Rik	0	0	0	0	0	2	9	0	0
Adra2b	0	0	0	0	0	12	0	0	0
Ifnar1	16	0	0	0	0	3	0	0	0
Alkbh2	0	0	0	0	0	6	0	12	0
Mrpl49	0	0	0	0	0	0	0	1	0
Cyp2b23	0	0	0	0	0	2	0	0	0
Lace1	0	0	0	0	0	1	0	0	0
Fam108b	0	0	0	0	0	4	0	7	0
Olfr763	0	0	0	0	0	1	0	0	0
Vps4b	0	1	0	0	0	7	0	0	0
1600002K03Rik	1	0	4	0	0	17	0	19	0
Gm340	0	0	0	0	0	23	0	6	0
Gm15832	0	0	0	0	0	7	0	1	0
Gm11202	0	0	0	0	0	1	0	2	0
Nos1	0	0	0	0	0	1	0	0	0
Irak2	0	0	0	0	0	1	0	0	0
Kctd17	0	0	10	0	0	17	0	33	0
Olfr753	0	0	0	0	0	0	2	0	0
Gm6079	0	0	0	0	0	1	0	0	0
Tnfrsf12a	0	0	0	0	0	0	26	0	0
Gm19684	1	0	0	0	0	0	0	0	0
4933439F18Rik	0	0	0	0	0	17	0	0	0
Rnf10	0	0	0	0	0	3	0	1	0
Mtap7d1	2	0	0	0	0	26	3	0	0
Olfml2b	0	0	0	0	0	15	0	0	0
Chchd5	0	0	0	0	0	13	0	1	0
Cadm4	0	0	0	0	0	0	0	17	0
Gm13559	0	0	0	0	0	8	0	0	0
Gm1679	0	0	0	0	0	1	0	0	0
Gm10774	1	0	1	0	0	3	0	0	0
Psmc2	0	0	0	0	0	4	0	1	0
Tbc1d10c	0	0	0	0	0	4	2	0	0
Dnajc7	0	0	4	0	0	6	0	0	0
Aldh1l1	0	0	0	0	0	22	0	0	0
Numbl	0	0	0	0	0	44	0	0	0
Mir425	0	0	0	0	0	2	0	0	0
Cad	0	0	0	0	0	3	0	0	0
Grap	0	0	0	0	0	14	5	0	0
SNORA28	0	0	0	0	0	2	0	0	0
Gm11724	0	0	0	0	0	0	3	0	0
Dicer1	0	0	0	0	0	17	0	0	0
Cnih	0	0	0	0	0	7	0	0	0
Igf2as	0	0	0	0	0	5	0	3	0
Rnf44	0	0	0	0	0	3	0	0	0
Ndufc2	0	0	0	0	0	19	0	6	0
Gm16519	0	0	0	0	0	14	0	7	0
Gm6128	0	0	0	0	0	2	0	0	0
Foxn3	0	0	0	0	0	38	0	0	0
Serpinb9	0	0	0	0	0	3	0	0	0
Gm1332	0	0	0	0	0	8	0	0	0
Lrrc36	0	0	1	0	0	3	0	3	0
Gm15531	0	0	0	0	0	8	0	0	0
Gm6565	1	0	0	0	0	4	0	0	0
Foxk2	0	0	0	0	0	1	0	0	0
Psmd5	5	0	0	0	0	12	0	0	0
Fam195a	0	0	0	0	0	2	0	0	0
Ncam2	4	0	0	0	0	0	0	0	0
Mtfmt	0	0	1	0	0	0	30	8	0
Nf2	3	0	0	0	0	5	0	0	0
Adamts2	3	0	0	0	0	10	0	0	0
9330175E14Rik	0	0	0	0	0	9	0	7	0
Kifc1	0	0	0	0	0	1	0	0	0
Gpr17	1	0	0	0	0	0	0	0	0
Jkamp	0	0	10	0	0	0	0	0	0
Gm6406	0	0	0	0	0	1	0	0	0
Sp7	8	0	0	0	0	0	0	0	0
Gm14028	0	0	0	0	0	2	0	0	0
Tmem29	0	0	1	0	0	0	0	0	0
Gm13704	8	0	0	0	0	1	3	9	0
Psme1	1	0	0	0	0	0	0	12	0
Stk38	0	0	0	0	0	14	9	9	0
Plin2	0	0	0	0	0	21	0	0	0
Lrfn1	0	0	0	0	0	9	0	28	0
Emp1	2	0	0	0	0	14	0	0	0
Fam64a	0	0	0	0	0	0	0	1	0
Cnr2	0	0	0	0	0	3	0	0	0
Dnajb12	0	0	0	0	0	84	0	0	0
Psme3	5	0	1	0	0	7	0	0	0
Zp3r	0	0	0	0	0	4	0	0	0
Hnrpll	0	0	0	0	0	2	0	0	0
Casp4	0	0	0	0	0	0	0	13	0
Olfr323	0	0	0	0	0	1	0	0	0
Mcf2l	2	0	0	0	0	0	0	0	0
Tti1	3	0	5	0	0	5	0	16	0
3222401L13Rik	0	0	0	0	0	0	2	0	0
Nrgn	1	0	2	0	0	0	0	0	0
Gm17260	0	0	0	0	0	8	0	0	0
Gm9766	0	0	3	0	0	0	0	0	0
Cntn2	0	0	0	0	0	4	5	0	0
Ankrd60	0	0	0	0	0	3	0	0	0
Ubr4	5	0	2	0	0	3	0	0	0
Trnau1ap	1	0	1	0	0	0	0	0	0
Tbc1d10b	0	0	0	0	0	0	2	8	0
Ankrd2	1	1	0	0	0	0	0	0	0
Mcm3	0	0	0	0	0	9	0	0	0
Gm15372	0	0	0	0	0	2	0	0	0
Gypc	0	0	0	0	0	6	0	0	0
Sh2d1b1	3	0	2	0	0	1	0	0	0
Prox2	10	0	9	0	0	6	0	0	0
Mars	0	0	4	0	0	12	0	0	0
Wdr64	4	0	0	0	0	0	0	0	0
Agmat	0	0	0	0	0	4	0	19	0
Sae1	0	0	0	0	0	34	0	27	0
Lrrc39	0	1	0	0	0	0	0	0	0
0610007C21Rik	0	0	0	0	0	5	0	0	0
BC035947	3	0	0	0	0	2	0	0	0
Gm15323	0	0	0	0	0	1	0	1	0
Olfr1034	1	0	0	0	0	0	0	0	0
Gm17138	0	0	0	0	0	6	0	0	0
2610109H07Rik	1	0	0	0	0	0	0	0	0
Tmco6	0	0	0	0	0	0	26	0	0
Ccdc18	2	0	0	0	0	0	0	0	0
Gm13717	7	0	0	0	0	0	0	0	0
Ctbp2	0	0	0	0	0	1	0	0	0
March6	0	0	7	0	0	3	0	0	0
Tmem198b	0	0	0	0	0	2	0	0	0
Kcnk6	0	0	0	0	0	89	0	0	0
Scpep1	0	0	0	0	0	1	0	0	0
Scel	3	0	0	0	0	7	0	1	0
Dbx1	0	0	0	0	0	1	0	0	0
Lrrc16b	0	0	0	0	0	0	0	4	0
Nutf2	5	0	11	0	0	14	0	4	0
Bbc3	0	0	0	0	0	32	0	32	0
D930016D06Rik	0	0	0	0	0	3	0	0	0
Scrn2	2	0	0	0	0	1	0	8	0
Vim	0	0	0	0	0	15	0	0	0
Zfp109	0	0	0	0	0	0	0	4	0
Inpp4a	0	0	0	0	0	13	0	1	0
Thrap3	2	0	0	0	0	16	4	0	0
Cyp2c44	5	0	0	0	0	0	0	3	0
Gm15083	0	0	0	0	0	1	0	0	0
D330028D13Rik	0	0	0	0	0	3	0	11	0
AW121686	0	0	0	0	0	0	0	4	0
Vps28	5	0	0	0	0	16	0	0	0
Mir3057	0	0	0	0	0	3	0	0	0
Olfr222	0	0	0	0	0	0	0	1	0
Ssh2	0	0	2	0	0	6	0	0	0
Oxct1	5	0	1	0	0	0	0	0	0
Atad1	0	0	0	0	0	7	0	1	0
BC096441	0	0	0	0	0	5	0	0	0
Gm13067	1	0	5	0	0	3	0	4	0
2500002B13Rik	0	0	0	0	0	3	0	3	0
Atp5k	4	0	0	0	0	0	0	0	0
Kif6	0	0	0	0	0	1	0	0	0
C1qc	0	0	0	0	0	6	1	0	0
Gm11767	0	0	9	0	0	11	0	1	0
Cdc42se1	3	0	0	0	0	0	0	5	0
Senp3	0	0	0	0	0	9	0	0	0
Aaas	10	0	0	0	0	0	0	0	0
Gm11526	1	0	0	0	0	0	0	0	0
1110058L19Rik	0	0	0	0	0	4	0	0	0
Otud1	0	0	0	0	0	1	0	0	0
Pfkfb4	3	0	0	0	0	0	0	0	0
Gm12693	0	0	0	0	0	10	0	0	0
Fut8	0	0	0	0	0	6	0	0	0
Zw10	0	0	0	0	0	48	0	0	0
Nqo2	0	0	0	0	0	27	0	0	0
Rfxank	6	0	0	0	0	2	0	0	0
C030046E11Rik	0	0	7	0	0	0	0	0	0
Esam	0	0	2	0	0	0	0	0	0
Gm11643	0	0	0	0	0	6	0	0	0
Gm10647	0	0	0	0	0	7	0	0	0
Gm4934	0	0	0	0	0	1	0	0	0
Gm14278	0	0	0	0	0	1	0	0	0
Kynu	0	0	0	0	0	0	0	2	0
snoU90	0	0	0	0	0	4	0	0	0
Gm4963	0	0	0	0	0	2	0	7	0
Lin52	1	0	0	0	0	1	0	0	0
Gm13446	0	0	0	0	0	22	0	0	0
Sdr42e1	0	0	0	0	0	4	0	0	0
Itih3	0	0	0	0	0	1	0	0	0
Amotl2	0	0	0	0	0	1	0	0	0
Rps15a	1	1	3	0	0	28	0	5	0
AA413626	2	0	0	0	0	1	0	0	0
Bmp8b	0	0	0	0	0	2	0	0	0
Tmem54	2	0	0	0	0	0	0	0	0
B2m	0	0	2	0	0	0	0	0	0
Fam13a	0	0	6	0	0	0	0	0	0
Grid2ip	0	0	0	0	0	2	0	0	0
Gm9851	2	0	0	0	0	0	0	0	0
Bcl6b	0	0	0	0	0	14	0	0	0
Ccdc158	0	0	0	0	0	4	0	0	0
BC089597	0	0	2	0	0	0	0	0	0
Fam36a	0	0	0	0	0	6	0	0	0
AF251705	2	0	0	0	0	10	0	14	0
A430071A18Rik	0	0	7	0	0	12	0	0	0
Tnfaip8l2	3	0	0	0	0	1	0	0	0
2610101N10Rik	3	0	0	0	0	0	0	0	0
Plec	3	0	0	0	0	22	0	0	0
SCARNA16	0	0	0	0	0	1	0	0	0
Cobra1	0	0	0	0	0	12	2	6	0
Rab40c	0	0	0	0	0	2	0	0	0
Mir5103	0	0	0	0	0	1	0	0	0
Arpc2	0	0	0	0	0	15	0	1	0
Ppid	0	0	0	0	0	11	0	1	0
Unkl	2	0	0	0	0	2	0	0	0
Gm2663	0	0	0	0	0	1	0	0	0
Gm12924	0	0	0	0	0	0	0	2	0
Slc25a34	0	0	0	0	0	5	0	43	0
Med11	0	0	0	0	0	2	0	0	0
Txndc3	0	0	0	0	0	0	0	6	0
Cyp7b1	7	0	0	0	0	0	0	0	0
Gm13707	0	0	0	0	0	1	2	9	0
Pih1d2	0	0	0	0	0	4	0	0	0
Wdr34	0	0	0	0	0	2	0	0	0
Gm17096	1	0	1	0	0	0	0	0	0
Gng2	0	0	0	0	0	8	0	23	0
Gbas	4	3	0	0	0	6	0	0	0
Spata24	0	0	0	0	0	2	0	21	0
2810021B07Rik	0	0	0	0	0	1	0	0	0
Tfpt	0	0	0	0	0	1	0	0	0
Nphs2	0	0	0	0	0	1	0	0	0
Itm2b	0	0	0	0	0	8	0	0	0
Prmt7	2	0	4	0	0	8	0	2	0
Gm17322	2	0	0	0	0	0	0	0	0
Tdp1	0	0	0	0	0	29	0	0	0
Ikzf5	2	0	0	0	0	0	0	0	0
5730403B10Rik	0	0	0	0	0	13	0	0	0
Mier3	0	0	0	0	0	8	0	8	0
Sftpa1	0	0	0	0	0	4	0	0	0
Ahdc1	0	0	0	0	0	14	0	4	0
Jph4	0	0	11	0	0	0	0	0	0
Srcin1	8	0	0	0	0	14	0	1	0
Unc50	0	0	0	0	0	13	0	2	0
Gm12275	0	0	0	0	0	0	0	7	0
Kazn	0	0	0	0	0	8	0	0	0
Lyzl1	0	0	0	0	0	1	0	0	0
Fyttd1	0	0	0	0	0	2	0	5	0
Agap3	0	0	0	0	0	4	0	0	0
SNORA31	0	0	0	0	0	5	0	3	0
Gm15964	1	0	0	0	0	3	0	0	0
Adam12	0	0	0	0	0	5	0	0	0
Tmem11	3	0	0	0	0	3	0	0	0
Gm11788	0	0	0	0	0	0	6	0	0
E530011L22Rik	0	0	0	0	0	1	0	0	0
S100pbp	5	0	0	0	0	4	0	0	0
Accs	0	0	7	0	0	9	0	0	0
Exosc3	25	0	0	0	0	1	0	1	0
Rasal2	2	0	0	0	0	0	0	0	0
Il10ra	0	0	0	0	0	11	0	0	0
Nubp2	3	0	0	0	0	10	0	0	0
Fbxo17	0	0	0	0	0	11	0	10	0
Gm13153	1	0	0	0	0	0	0	0	0
Gm9183	0	0	0	0	0	7	0	0	0
Glud1	1	0	0	0	0	0	0	0	0
Edn1	0	0	0	0	0	3	0	0	0
Ctsc	0	0	0	0	0	18	0	5	0
Cort	0	0	0	0	0	2	0	0	0
Dlk1	0	0	0	0	0	3	0	0	0
Kcna2	0	0	2	0	0	0	0	0	0
Gm17281	5	0	0	0	0	0	0	3	0
Apol6	8	0	0	0	0	5	0	0	0
Gm11750	0	0	0	0	0	0	0	1	0
Sdhaf2	0	0	0	0	0	0	0	1	0
Rbmx2	0	0	0	0	0	3	0	0	0
Ptprg	0	0	0	0	0	10	0	0	0
Ldlrad3	0	0	0	0	0	14	0	0	0
Gm13391	0	0	0	0	0	2	0	5	0
Tuba1c	0	0	0	0	0	5	3	6	0
Vps72	3	0	0	0	0	1	0	0	0
Gm13076	0	0	0	0	0	1	0	1	0
Gm14229	0	0	0	0	0	1	0	0	0
Smcr7	3	0	0	0	0	0	0	0	0
Gm12452	0	0	0	0	0	1	0	0	0
Alkbh3	1	0	5	0	0	5	0	1	0
Abcb8	0	0	0	0	0	5	0	0	0
Serpina3d	0	0	0	0	0	0	0	1	0
Mynn	1	0	0	0	0	0	0	0	0
Nanog	0	0	0	0	0	20	0	1	0
Eif3k	0	0	0	0	0	36	0	0	0
Il20rb	0	0	0	0	0	12	0	0	0
Ltv1	0	0	0	0	0	7	0	2	0
Ddx59	2	0	0	0	0	7	0	4	0
Gm17288	0	0	0	0	0	1	0	0	0
Ulk4	0	0	0	0	0	1	0	3	0
Gm11574	0	0	0	0	0	0	0	2	0
Pkib	0	0	0	0	0	0	0	4	0
Adamts4	0	0	0	0	0	3	0	0	0
Runx2	0	0	0	0	0	22	0	0	0
4930597O21Rik	0	0	0	0	0	6	0	0	0
Sspn	0	5	2	0	0	2	0	0	0
Cpne5	0	0	0	0	0	1	15	4	0
1200016B10Rik	0	0	2	0	0	5	0	15	0
C1qtnf3	0	0	0	0	0	2	0	0	0
Cops4	0	0	0	0	0	14	0	28	0
Gm12749	0	0	0	0	0	24	0	0	0
E130215H24Rik	0	0	0	0	0	3	0	0	0
Agr2	0	0	0	0	0	1	0	0	0
Gm12346	0	0	1	0	0	3	0	0	0
Gm11380	0	0	0	0	0	1	0	0	0
Art5	0	0	0	0	0	2	0	0	0
Dync1i2	0	0	0	0	0	1	0	0	0
Exoc2	0	0	0	0	0	11	0	0	0
Gm9788	0	0	0	0	0	5	0	0	0
Arih1	0	0	0	0	0	0	11	0	0
Tmem131	0	0	0	0	0	31	0	17	0
Ubd	0	0	0	0	0	1	2	0	0
Rnf11	0	0	0	0	0	36	0	0	0
Nbeal2	0	0	0	0	0	3	0	15	0
Gpr141	0	0	0	0	0	4	0	2	0
Wdr48	0	0	0	0	0	8	0	0	0
Entpd1	0	0	0	0	0	10	0	0	0
Zfp839	0	0	0	0	0	14	0	0	0
Ccdc136	0	0	1	0	0	0	0	0	0
I830012O16Rik	0	0	0	0	0	12	0	24	0
Itpkb	2	0	0	0	0	3	0	0	0
Gmeb1	1	0	1	0	0	1	0	0	0
Rtn2	3	0	0	0	0	7	0	0	0
Srp54b	0	0	0	0	0	1	0	0	0
Srrm2	0	0	0	0	0	0	19	0	0
Dpysl4	0	0	0	0	0	1	0	2	0
Zmat2	0	0	0	0	0	0	15	0	0
Tatdn2	0	0	0	0	0	2	0	0	0
Rps6ka1	0	0	0	0	0	16	0	11	0
Sh3tc1	0	0	0	0	0	8	0	0	0
Gmpr2	2	0	0	0	0	0	0	10	0
Sltm	0	0	0	0	0	15	0	0	0
Sept3	0	0	0	0	0	2	0	0	0
Gm17481	0	0	0	0	0	2	0	1	0
Ttc23	0	0	0	0	0	5	0	4	0
Gm8738	0	0	0	0	0	2	0	0	0
Pole3	0	0	0	0	0	8	0	1	0
Gm11435	0	0	0	0	0	11	0	8	0
Art2a	0	0	0	0	0	2	0	0	0
E2f6	0	0	0	0	0	9	0	0	0
Gm11604	0	0	0	0	0	0	0	6	0
Bex4	0	0	0	0	0	7	0	8	0
Clns1a	0	0	0	0	0	6	0	18	0
Kcnb2	0	0	1	0	0	0	0	0	0
Kifc2	10	0	0	0	0	42	0	0	0
Gm16031	3	0	0	0	0	0	0	4	0
Man1b1	0	0	0	0	0	11	4	3	0
Pank1	0	0	1	0	0	6	0	5	0
Shkbp1	0	0	0	0	0	51	0	0	0
St3gal1	0	0	0	0	0	10	0	30	0
Sec13	0	0	0	0	0	2	0	0	0
Smox	0	0	0	0	0	33	0	9	0
Endod1	0	0	0	0	0	6	0	0	0
Bid	0	0	0	0	0	0	0	3	0
Ctsd	0	0	0	0	0	43	0	10	0
5033430I15Rik	0	0	0	0	0	3	0	1	0
Gm15413	0	0	0	0	0	4	0	0	0
Gm1673	1	0	1	0	0	8	0	0	0
Lsr	0	0	0	0	0	1	0	7	0
0610009D07Rik	0	0	0	0	0	6	0	0	0
Ccdc93	0	0	0	0	0	7	0	3	0
Lgr6	0	0	0	0	0	1	0	0	0
Cox6b2	11	0	0	0	0	0	0	0	0
Sepsecs	0	0	0	0	0	4	0	0	0
Ap1s3	0	0	0	0	0	13	0	0	0
Dtx3	0	0	1	0	0	18	0	0	0
BC021614	0	0	0	0	0	2	1	0	0
Rnpepl1	6	0	0	0	0	0	0	0	0
Gm15954	1	0	0	0	0	1	0	0	0
Stmn2	0	0	0	0	0	13	0	0	0
Gm11653	0	0	0	0	0	1	0	0	0
Pkig	0	0	0	0	0	7	0	8	0
Hist2h2bb	0	0	0	0	0	3	0	0	0
Camsap2	1	0	0	0	0	8	0	4	0
Traj17	0	0	0	0	0	0	1	0	0
Rnf126	0	0	4	0	0	6	0	23	0
Hmgxb3	0	0	0	0	0	34	0	22	0
Exosc9	0	0	0	0	0	13	0	0	0
Dimt1	0	0	0	0	0	27	0	0	0
Pbrm1	0	0	0	0	0	6	0	0	0
Rftn2	4	0	6	0	0	16	0	0	0
Slc22a26	0	0	1	0	0	3	0	0	0
Ninj1	0	0	0	0	0	1	0	1	0
Rtl1	0	0	0	0	0	3	0	0	0
Mapk7	0	0	0	0	0	14	6	0	0
Hist1h2aa	0	0	0	0	0	2	0	0	0
Cndp1	0	0	0	0	0	0	0	15	0
Strbp	0	0	0	0	0	6	0	0	0
Ndufs4	0	0	0	0	0	2	0	0	0
Adh6	0	0	3	0	0	0	0	0	0
C920011F04Rik	2	2	0	0	0	0	0	1	0
Rmnd5b	0	0	0	0	0	8	0	0	0
4930597A21Rik	0	0	0	0	0	0	2	0	0
Sec62	1	0	0	0	0	3	0	5	0
Cdc23	1	0	0	0	0	2	0	0	0
Sec24a	0	0	0	0	0	48	0	0	0
Acta2	0	0	0	0	0	11	0	8	0
Snord65	1	0	0	0	0	0	0	5	0
Fbrsl1	0	0	0	0	0	22	0	0	0
1110006G14Rik	0	0	0	0	0	2	0	0	0
Dnajb7	0	0	0	0	0	11	0	13	0
C2cd4c	0	0	0	0	0	0	0	14	0
Gm1043	0	0	0	0	0	1	0	1	0
Elmo2	0	0	0	0	0	9	0	0	0
Gm10293	0	0	0	0	0	84	0	0	0
Camk1d	0	0	0	0	0	2	0	0	0
1110008J03Rik	0	0	0	0	0	14	0	17	0
Gm9530	0	0	0	0	0	1	0	0	0
Muc3	0	0	0	0	0	1	0	0	0
Ppip5k2	0	0	0	0	0	4	0	0	0
Efnb1	0	0	0	0	0	6	0	0	0
Mterfd1	0	0	1	0	0	0	0	0	0
Dcun1d3	3	0	0	0	0	1	0	0	0
Klhl3	0	0	0	0	0	1	0	0	0
Zfpl1	0	0	0	0	0	0	0	2	0
Trcg1	0	0	4	0	0	7	0	0	0
1810074P20Rik	6	0	0	0	0	0	0	0	0
Anapc1	0	0	0	0	0	21	0	23	0
Ndufa6	0	0	0	0	0	2	0	0	0
Boll	1	0	0	0	0	1	0	0	0
Gm17227	0	0	3	0	0	0	0	0	0
Dennd5a	0	0	0	0	0	5	0	0	0
Herpud2	0	0	0	0	0	7	0	0	0
Epn2	0	0	0	0	0	12	5	0	0
5830462I19Rik	0	0	0	0	0	3	0	0	0
Avp	0	0	0	0	0	1	0	0	0
Gm15287	0	0	0	0	0	1	0	1	0
Lhx5	0	0	0	0	0	0	0	1	0
Ces1a	3	0	4	0	0	3	0	0	0
Gm17119	7	0	4	0	0	0	0	0	0
Apol10b	0	0	0	0	0	1	0	1	0
Rufy4	0	0	0	0	0	13	0	1	0
C530028O21Rik	0	0	3	0	0	1	0	0	0
Gdpd5	0	0	0	0	0	3	0	0	0
Gm14491	0	0	0	0	0	1	0	0	0
Rdh12	0	0	0	0	0	2	0	0	0
Rab5b	1	0	0	0	0	2	0	0	0
1810037I17Rik	0	0	0	0	0	3	0	0	0
Zfand3	0	0	0	0	0	6	2	0	0
Mrps9	0	0	0	0	0	3	0	0	0
Gm11692	0	0	0	0	0	1	0	0	0
4921513I03Rik	0	0	0	0	0	0	0	1	0
Mr1	0	0	0	0	0	9	0	0	0
Eftud2	0	0	0	0	0	5	0	0	0
Plxna2	0	0	3	0	0	9	0	0	0
Cldn23	0	0	0	0	0	5	2	0	0
Zfand5	0	0	0	0	0	4	0	0	0
Wdr7	0	0	0	0	0	2	0	0	0
Slc38a10	0	0	14	0	0	23	5	2	0
Dnajc14	1	0	0	0	0	2	0	0	0
Macrod1	0	0	0	0	0	4	0	0	0
Gm9719	5	0	0	0	0	0	0	0	0
Trpd52l3	1	0	0	0	0	0	0	0	0
Apob	3	0	0	0	0	3	0	0	0
Diexf	0	0	25	0	0	0	0	0	0
Gm5870	0	0	0	0	0	0	2	2	0
Ghdc	0	0	4	0	0	2	0	0	0
Gm15516	0	0	1	0	0	0	0	0	0
Adam33	0	0	0	0	0	2	0	3	0
Rps20	0	0	0	0	0	3	0	0	0
Sf3b5	0	0	0	0	0	24	0	24	0
Kcnj12	3	0	0	0	0	0	0	0	0
Gm16227	0	0	0	0	0	1	0	0	0
Ik	0	0	0	0	0	0	24	0	0
Cdc26	0	0	0	0	0	6	0	0	0
Gm17275	0	0	0	0	0	2	0	0	0
Smt3h1	0	0	0	0	0	2	0	5	0
Cox15	4	0	0	0	0	0	0	0	0
Nckipsd	5	0	0	0	0	0	0	0	0
Ly6g6c	0	0	0	0	0	0	0	8	0
Abcb4	0	0	0	0	0	10	0	0	0
Gm5602	0	0	0	0	0	2	0	0	0
N4bp2l1	0	0	3	0	0	0	0	2	0
Vps53	0	0	0	0	0	5	17	0	0
Brca2	0	0	0	0	0	1	0	1	0
Cplx4	0	0	0	0	0	1	0	0	0
Zfp580	8	0	0	0	0	0	0	0	0
Siah2	2	0	0	0	0	1	0	0	0
Ccne2	4	0	0	0	0	1	0	0	0
Zfp101	0	0	0	0	0	9	0	0	0
Arid1b	3	0	0	0	0	13	0	0	0
Hdac3	0	0	0	0	0	0	9	1	0
Bnip1	1	0	0	0	0	7	0	0	0
Gm4755	0	0	0	0	0	2	0	0	0
En2	0	0	1	0	0	0	0	0	0
Yme1l1	0	0	0	0	0	19	0	5	0
Spsb1	3	0	5	0	0	8	0	24	0
Pawr	0	0	0	0	0	11	0	0	0
Slc25a27	0	0	0	0	0	0	0	10	0
Trabd	0	0	0	0	0	0	0	20	0
Gm14573	0	0	0	0	0	1	0	0	0
Slc9a4	1	0	0	0	0	0	0	0	0
Dhrs3	0	0	0	0	0	5	0	0	0
Polg2	0	0	0	0	0	29	0	0	0
Dnajc16	0	0	0	0	0	20	0	35	0
Tnip1	0	0	0	0	0	51	0	13	0
Fgf6	0	0	0	0	0	1	0	0	0
Gm9905	0	0	0	0	0	0	0	5	0
Cd3eap	4	0	0	0	0	5	0	0	0
Tceb2	0	0	0	0	0	0	9	0	0
Gm20489	0	0	0	0	0	2	0	0	0
Flii	3	0	0	0	0	2	0	0	0
Gm16749	0	0	0	0	0	1	0	1	0
Fcf1	9	0	8	0	0	7	0	0	0
Lrp6	0	0	0	0	0	13	0	2	0
Zxdc	0	0	0	0	0	29	0	0	0
Svop	0	0	0	0	0	4	0	0	0
Gm14471	0	0	0	0	0	0	0	1	0
Mboat4	0	0	0	0	0	0	0	4	0
Folr2	0	0	0	0	0	5	0	0	0
Gm16185	0	0	4	0	0	0	0	6	0
Gm13572	0	0	0	0	0	3	0	1	0
2010002N04Rik	0	0	0	0	0	7	0	24	0
AC157822.1	0	0	0	0	0	2	0	0	0
Gm16494	1	0	0	0	0	0	0	0	0
SCARNA23	0	0	0	0	0	3	0	0	0
Gm16022	4	0	0	0	0	0	0	0	0
Cbr4	0	0	0	0	0	2	0	0	0
Naa35	1	0	0	0	0	8	0	0	0
Zmym6	0	0	0	0	0	5	0	0	0
Clec4e	0	0	0	0	0	1	0	3	0
Samd3	0	0	0	0	0	2	0	0	0
Slit1	2	2	0	0	0	2	0	0	0
Gpr31c	0	0	0	0	0	6	0	0	0
Gm11731	0	0	0	0	0	1	0	0	0
Zfp518b	0	0	0	0	0	5	0	0	0
B3gnt6	0	0	0	0	0	0	0	1	0
Mafg	0	0	0	0	0	0	9	0	0
Mrpl9	2	0	0	0	0	0	0	0	0
Gna14	0	0	0	0	0	8	0	0	0
Ppp2ca	0	0	0	0	0	56	0	0	0
Pkn3	0	0	0	0	0	2	0	0	0
Gm17555	0	0	0	0	0	0	1	0	0
Cyp2d12	0	0	0	0	0	1	0	0	0
Ccdc8	0	0	0	0	0	9	0	5	0
Vamp7	0	0	0	0	0	6	0	0	0
Ppp1r12b	0	0	0	0	0	1	0	0	0
Cenpj	1	0	0	0	0	0	0	0	0
Gm12903	0	0	0	0	0	0	0	4	0
Mir215	1	0	0	0	0	2	0	0	0
Gm13610	0	0	0	0	0	3	0	5	0
Spatc1	1	0	0	0	0	2	0	0	0
Gm11703	3	3	0	0	0	1	0	2	0
Gm13648	0	0	0	0	0	1	1	0	0
Snai1	0	0	0	0	0	10	0	9	0
Samd15	0	0	0	0	0	10	0	0	0
Fubp3	0	0	0	0	0	0	0	24	0
Ankhd1	0	0	0	0	0	0	41	0	0
Sucla2	0	0	0	0	0	6	0	0	0
Uba1	0	0	0	0	0	7	0	0	0
Gm10250	0	0	0	0	0	13	0	5	0
Brwd1	0	0	0	0	0	37	4	0	0
Hist1h3h	0	0	0	0	0	4	0	11	0
Nono	0	0	0	0	0	2	0	0	0
Olfr693	0	0	0	0	0	1	0	0	0
Gm17021	0	0	0	0	0	1	0	0	0
Snx15	0	0	0	0	0	0	1	1	0
Paf1	0	0	0	0	0	24	0	32	0
Snora62	0	0	0	0	0	1	0	0	0
Cda	0	0	0	0	0	2	0	1	0
Ccl2	0	0	0	0	0	0	0	1	0
Mrpl45	15	0	0	0	0	10	0	1	0
Mvp	0	0	0	0	0	0	0	8	0
Gm15581	2	0	0	0	0	0	0	0	0
G530011O06Rik	0	0	0	0	0	7	0	0	0
Otud7b	0	0	0	0	0	12	0	0	0
Gm10053	0	0	0	0	0	1	0	0	0
Slc25a29	0	0	0	0	0	2	0	13	0
Stox1	0	0	0	0	0	0	0	1	0
Mars2	12	0	6	0	0	30	0	0	0
Nol9	0	0	11	0	0	2	1	7	0
Gm20319	0	0	1	0	0	0	0	0	0
Gprin1	0	0	0	0	0	3	0	0	0
Dstyk	0	0	0	0	0	5	23	0	0
Cdc37	0	0	6	0	0	55	0	1	0
Mtfp1	1	0	0	0	0	20	0	0	0
Ggta1	0	0	0	0	0	116	0	0	0
Kcne1	0	0	0	0	0	3	0	0	0
Kcnk13	0	0	0	0	0	7	0	0	0
Galp	0	0	1	0	0	0	0	0	0
Gm11689	0	0	0	0	0	3	0	1	0
Gpr22	5	0	0	0	0	0	0	0	0
Gm15928	0	0	0	0	0	6	0	0	0
Trim67	0	0	0	0	0	1	0	0	0
Gstt3	0	0	0	0	0	3	0	0	0
Ktn1	0	0	0	0	0	17	0	7	0
Tmem41a	0	0	0	0	0	6	0	0	0
Lypla2	0	0	0	0	0	2	0	0	0
Igfbp6	9	0	0	0	0	0	0	0	0
Gm17130	0	1	0	0	0	7	0	0	0
Gm12403	0	0	0	0	0	3	0	0	0
Rbm39	0	0	0	0	0	6	0	0	0
Fgfrl1	2	0	0	0	0	0	0	0	0
Cdc6	0	0	0	0	0	0	0	2	0
B3gnt3	0	0	0	0	0	1	3	0	0
Napsa	0	0	0	0	0	7	0	0	0
Narfl	0	0	0	0	0	1	0	0	0
Muc1	0	0	0	0	0	9	0	0	0
Tg	1	0	0	0	0	6	0	21	0
Mir1945	0	0	0	0	0	2	0	0	0
Hdlbp	0	0	0	0	0	5	0	0	0
Socs7	15	0	0	0	0	9	0	0	0
Mab21l2	0	0	0	0	0	2	0	0	0
Asah1	1	1	0	0	0	0	0	0	0
Glg1	2	0	0	0	0	2	0	0	0
Nfya	0	0	0	0	0	11	0	1	0
Gng8	0	0	0	0	0	11	0	4	0
Prps2	0	0	0	0	0	13	0	0	0
Wdr54	0	0	0	0	0	24	0	0	0
Gap43	0	0	0	0	0	4	0	0	0
Gm19560	0	0	0	0	0	2	0	0	0
Hnrnpul2	0	0	3	0	0	0	0	22	0
Synj2	0	0	0	0	0	18	14	0	0
Slc25a45	0	0	0	0	0	0	1	0	0
Ascl4	0	0	0	0	0	6	0	0	0
Acer1	0	0	0	0	0	0	0	1	0
Rnf39	0	0	0	0	0	5	2	0	0
Gpr137b	0	0	0	0	0	3	0	0	0
Theg	0	0	0	0	0	0	0	4	0
Gm12094	0	0	0	0	0	3	0	0	0
Fth1	2	0	0	0	0	0	0	0	0
Phkg2	0	0	0	0	0	2	11	2	0
Cpeb3	0	0	0	0	0	4	0	0	0
Gm14371	0	0	0	0	0	1	0	0	0
Gm15936	0	0	0	0	0	1	1	0	0
Ighj4	0	0	0	0	0	2	0	0	0
Gm16098	0	0	0	0	0	1	0	0	0
Nif3l1	8	0	0	0	0	0	0	2	0
Sirpa	0	0	0	0	0	11	0	11	0
Ins2	0	0	0	0	0	2	0	0	0
Ddi2	0	0	0	0	0	17	0	54	0
Anp32b	0	0	0	0	0	1	0	0	0
Gm6723	0	0	7	0	0	22	0	27	0
Vps37c	1	0	0	0	0	0	0	7	0
Gpr183	0	0	0	0	0	6	0	0	0
Hyou1	1	0	0	0	0	1	0	0	0
Prkar1b	0	0	0	0	0	5	0	5	0
Gm15834	2	0	0	0	0	0	0	0	0
F830016B08Rik	0	0	0	0	0	0	0	11	0
Trim63	0	0	0	0	0	6	0	8	0
SNORA19	0	0	0	0	0	2	0	0	0
Oxsm	0	0	0	0	0	1	0	1	0
Tusc2	0	0	0	0	0	7	8	35	0
F420014N23Rik	0	0	0	0	0	10	0	0	0
Isg15	0	0	0	0	0	5	0	0	0
Snx8	0	0	0	0	0	17	0	17	0
1700007J10Rik	0	0	0	0	0	9	0	1	0
Nol6	0	0	0	0	0	5	0	0	0
Cldn11	0	0	0	0	0	4	0	7	0
Ppp1r3e	0	0	9	0	0	0	1	0	0
Mettl6	0	1	0	0	0	0	0	0	0
A930001N09Rik	1	0	0	0	0	4	0	0	0
C030005K06Rik	0	0	0	0	0	12	0	0	0
Gm15290	0	0	0	0	0	1	0	1	0
Gm20488	0	0	0	0	0	2	0	0	0
Hbegf	0	0	0	0	0	0	33	0	0
Mlf1	0	0	0	0	0	0	0	2	0
Igfbp2	0	0	0	0	0	3	0	2	0
Zfand1	5	0	0	0	0	0	0	0	0
Nlrp1b	0	0	0	0	0	4	0	0	0
Gpr62	0	0	0	0	0	10	0	0	0
Tspo	0	0	0	0	0	8	0	1	0
Drd1a	0	0	0	0	0	6	0	4	0
Ifi35	3	0	0	0	0	5	0	0	0
Ruvbl2	11	0	0	0	0	1	0	0	0
Txnrd3	0	0	0	0	0	17	0	0	0
Stk4	0	0	0	0	0	3	0	3	0
Tmco7	0	0	0	0	0	8	0	3	0
Gstm5	7	0	7	0	0	35	33	4	0
Gm11548	0	0	0	0	0	4	0	0	0
Mapk12	0	0	0	0	0	0	0	11	0
A630055G03Rik	0	0	0	0	0	25	10	0	0
A730085K08Rik	2	0	0	0	0	2	0	0	0
Scp2	0	0	0	0	0	2	0	0	0
Gm14026	0	0	0	0	0	10	0	0	0
Gdf5	0	0	0	0	0	1	0	0	0
Bri3bp	0	0	0	0	0	1	0	9	0
Samd9l	1	0	0	0	0	16	0	0	0
Chchd3	0	0	0	0	0	2	0	0	0
Fam109b	0	0	0	0	0	1	0	0	0
1110028C15Rik	0	0	0	0	0	1	0	0	0
Upk1a	0	0	0	0	0	1	0	1	0
Armc10	0	0	0	0	0	19	0	2	0
Gm11612	1	0	0	0	0	4	0	0	0
Dhdds	0	0	0	0	0	21	0	11	0
Ptgir	0	0	0	0	0	10	0	5	0
Psmc1	0	0	0	0	0	21	0	0	0
Ms4a6c	0	0	0	0	0	8	0	9	0
Ssh1	0	0	0	0	0	16	0	24	0
Zfp688	0	0	0	0	0	0	7	6	0
Becn1	5	0	0	0	0	6	0	0	0
Dusp28	6	0	0	0	0	1	0	0	0
Bcl7b	6	0	0	0	0	2	0	0	0
Prnd	0	0	0	0	0	0	0	2	0
Ros1	0	0	0	0	0	1	0	0	0
Flt3l	1	0	0	0	0	0	0	0	0
Ttc32	0	0	0	0	0	9	0	0	0
5330430P22Rik	9	0	0	0	0	8	0	0	0
Clec4b1	0	0	0	0	0	2	0	1	0
A930012L18Rik	0	0	0	0	0	1	0	0	0
Tspan31	0	0	1	0	0	17	0	0	0
Defb40	0	0	0	0	0	0	0	1	0
Wars	0	0	0	0	0	0	0	11	0
Prr15	0	0	0	0	0	2	0	6	0
Snrpf	0	0	0	0	0	6	0	0	0
Gm13889	0	0	3	0	0	3	0	0	0
9430002A10Rik	0	0	0	0	0	29	0	5	0
Napepld	0	0	0	0	0	15	0	2	0
Sumf2	5	5	0	0	0	7	0	0	0
Ddx5	0	0	0	0	0	29	0	0	0
Tmem129	0	0	0	0	0	9	0	0	0
Xrcc3	4	0	0	0	0	0	0	0	0
Commd9	0	0	0	0	0	17	0	0	0
Mad2l1bp	0	0	0	0	0	3	0	2	0
snoU13	3	0	0	0	0	6	0	3	0
Flrt1	0	0	0	0	0	5	0	0	0
Ep300	0	0	0	0	0	12	0	1	0
Gm11453	0	0	0	0	0	1	0	1	0
Rcor3	3	0	0	0	0	14	0	0	0
Peli3	0	0	0	0	0	1	0	0	0
Slc30a4	0	0	1	0	0	0	0	0	0
Gaa	0	0	2	0	0	4	0	0	0
Kit	0	0	0	0	0	1	0	1	0
Pmpca	0	0	0	0	0	11	0	0	0
Med18	1	0	1	0	0	4	0	0	0
Gm10561	1	0	1	0	0	10	0	0	0
Mylip	0	0	0	0	0	7	0	0	0
Arhgap33	0	0	0	0	0	1	0	0	0
Gle1	0	0	0	0	0	19	0	0	0
Ndst1	0	0	0	0	0	28	0	33	0
Adam1a	0	0	0	0	0	3	0	0	0
Rnf207	0	0	15	0	0	0	0	8	0
Tsta3	0	0	0	0	0	1	0	0	0
Dlk2	0	0	4	0	0	8	0	5	0
Usp50	0	0	0	0	0	1	0	0	0
Slc12a3	0	0	0	0	0	10	0	12	0
D130007C19Rik	0	0	0	0	0	0	0	7	0
Tssk2	1	0	0	0	0	1	0	0	0
Prpf18	0	0	0	0	0	1	0	0	0
Polr3e	0	0	0	0	0	8	0	15	0
Gm4945	1	0	0	0	0	1	0	0	0
Gm10115	3	0	0	0	0	0	0	2	0
Fcna	0	0	0	0	0	2	3	0	0
Rap1gap	0	0	0	0	0	14	3	18	0
Slc39a1	0	0	0	0	0	18	0	0	0
Etfa	0	0	0	0	0	8	0	8	0
Prr13	9	0	0	0	0	0	0	4	0
Hist2h3c2	0	0	0	0	0	11	0	0	0
Gm3550	6	0	0	0	0	1	0	0	0
Smchd1	0	0	3	0	0	2	0	2	0
Scd2	8	0	0	0	0	0	0	11	0
Gm13186	1	0	0	0	0	0	0	0	0
Entpd5	2	0	0	0	0	1	0	0	0
Rbm14	0	0	0	0	0	2	0	0	0
Daam2	0	0	0	0	0	8	0	0	0
Gm10269	0	0	0	0	0	14	0	0	0
Ptcra	6	0	0	0	0	19	0	9	0
Plb1	0	8	0	0	0	5	0	0	0
Ppp1r3a	0	0	0	0	0	2	0	0	0
Ccdc163	2	0	0	0	0	2	0	0	0
Dnajc22	0	0	0	0	0	3	1	3	0
Farsb	4	0	0	0	0	4	0	0	0
Gm11744	0	0	1	0	0	6	0	0	0
Gm11665	2	0	0	0	0	0	0	0	0
Itfg1	0	0	0	0	0	1	0	0	0
Spnb3	0	0	0	0	0	2	0	0	0
Gm15325	0	0	0	0	0	1	0	1	0
1700123M08Rik	0	0	0	0	0	1	0	0	0
Plekhn1	0	0	0	0	0	4	6	0	0
Trpm4	7	0	0	0	0	0	0	0	0
Dcpp2	0	0	0	0	0	0	1	0	0
Naa50	0	0	0	0	0	11	0	0	0
Igfbp3	0	0	0	0	0	0	0	7	0
Gm12497	0	0	3	0	0	9	7	1	0
Wnt7b	4	0	0	0	0	5	0	0	0
Fam43a	0	0	0	0	0	8	0	0	0
2510009E07Rik	0	0	0	0	0	5	0	0	0
Zfp541	0	0	0	0	0	26	0	18	0
Olig1	6	0	0	0	0	0	0	0	0
Akap10	0	0	0	0	0	6	1	0	0
Gm10371	0	0	0	0	0	1	0	0	0
Use1	0	0	0	0	0	33	4	10	0
Ctu2	0	0	0	0	0	10	0	0	0
Nubp1	0	0	0	0	0	21	8	12	0
Olfr156	0	0	0	0	0	0	0	3	0
Gm16759	0	0	0	0	0	1	0	1	0
Gm2415	0	0	0	0	0	7	0	0	0
Ppp4r4	1	0	0	0	0	0	6	4	0
Fbxl20	0	0	0	0	0	3	0	7	0
Gm13413	0	0	0	0	0	2	0	8	0
Caprin1	0	0	4	0	0	13	0	11	0
Zdhhc25	0	0	0	0	0	0	0	5	0
Nufip2	0	0	0	0	0	20	0	0	0
Pacsin3	8	0	0	0	0	3	0	6	0
Krr1	0	0	0	0	0	13	0	0	0
Nolc1	0	0	0	0	0	9	0	4	0
Lrpap1	0	0	0	0	0	1	0	0	0
Alox12e	0	0	0	0	0	4	0	0	0
Slc39a5	1	0	0	0	0	0	0	0	0
1700001P01Rik	2	0	0	0	0	7	0	1	0
Gm11210	0	0	0	0	0	1	0	0	0
Rundc3b	0	0	0	0	0	6	0	0	0
Sp140	0	0	0	0	0	4	0	0	0
Mrpl18	1	0	0	0	0	28	0	0	0
SNORD83	0	0	0	0	0	0	0	4	0
Actg1	0	0	15	0	0	8	9	2	0
Fgf3	0	0	0	0	0	1	0	0	0
Vps37d	1	0	0	0	0	0	0	0	0
Gm20511	0	0	0	0	0	8	0	1	0
Gm16273	0	0	0	0	0	4	0	0	0
Cwc15	0	0	0	0	0	3	0	0	0
Mical3	0	0	0	0	0	0	0	5	0
Gm20493	0	0	0	0	0	2	0	1	0
Gm6695	0	0	0	0	0	2	0	0	0
Gm10563	0	0	0	0	0	1	0	0	0
Hdac6	0	0	0	0	0	3	0	0	0
Pomgnt1	0	4	0	0	0	12	21	0	0
Cntd1	3	0	0	0	0	4	0	0	0
Spen	0	0	0	0	0	2	0	56	0
4632428N05Rik	0	0	0	0	0	8	0	1	0
Sesn1	0	0	0	0	0	25	0	9	0
Hn1l	1	0	0	0	0	5	0	0	0
Ahcyl1	4	0	6	0	0	41	38	5	0
Gm15851	0	0	0	0	0	0	1	0	0
Lonrf2	0	0	0	0	0	2	0	0	0
Aldh1a7	13	0	7	0	0	0	0	0	0
Olfr703	0	0	0	0	0	2	0	1	0
1700029P11Rik	0	0	0	0	0	4	0	0	0
Il1a	0	0	0	0	0	11	0	4	0
Ngly1	0	0	0	0	0	2	0	1	0
Psmb8	0	0	0	0	0	9	0	7	0
Ttll11	0	0	0	0	0	8	0	3	0
1110057K04Rik	2	0	0	0	0	18	0	0	0
AC110235.1	0	0	0	0	0	0	1	0	0
Tmem72	0	0	0	0	0	1	0	0	0
Btaf1	0	0	1	0	0	3	0	0	0
Mark2	0	0	5	0	0	4	0	0	0
Rnf215	0	0	0	0	0	21	0	0	0
Slco1c1	0	0	0	0	0	7	0	0	0
Gm10233	0	0	0	0	0	1	0	0	0
Phf13	0	0	14	0	0	2	1	4	0
Ranbp3	1	0	1	0	0	0	0	1	0
Kcnk5	0	0	0	0	0	4	0	13	0
Gstp1	0	0	0	0	0	8	2	0	0
Letm2	0	0	0	0	0	2	0	0	0
Phxr2	0	0	0	0	0	6	0	0	0
Guca1b	0	0	0	0	0	3	0	0	0
Gm14140	0	0	0	0	0	1	0	0	0
Pilra	0	0	0	0	0	8	0	12	0
Lrpprc	0	0	0	0	0	5	0	0	0
Hspa9	7	0	0	0	0	2	0	0	0
AI427809	0	0	0	0	0	3	0	0	0
Gm10562	0	0	0	0	0	1	0	0	0
Dnahc10	0	0	0	0	0	0	0	1	0
Scrn3	5	0	0	0	0	5	11	49	0
Gm15556	0	0	0	0	0	3	0	0	0
Slc2a4	0	0	0	0	0	19	0	0	0
Ccdc25	0	0	0	0	0	9	0	2	0
Mmp2	0	0	3	0	0	16	0	0	0
Slc30a9	0	0	0	0	0	2	0	0	0
Mep1b	0	0	0	0	0	3	0	0	0
Kctd5	0	0	0	0	0	1	1	0	0
Tia1	0	0	0	0	0	3	0	0	0
Wdr1	0	0	0	0	0	6	0	0	0
Ceacam19	0	0	0	0	0	2	0	0	0
Zbtb4	0	0	0	0	0	19	0	0	0
Gm9949	0	0	0	0	0	14	0	4	0
Wbp4	0	0	0	0	0	6	0	0	0
Slc35b4	0	0	0	0	0	3	0	0	0
P2rx7	0	0	0	0	0	10	0	0	0
Stx11	0	0	0	0	0	13	0	23	0
Gm9733	0	0	0	0	0	2	0	0	0
Ogdh	0	0	2	0	0	11	0	3	0
Tle4	0	0	0	0	0	0	0	6	0
Lancl2	1	0	0	0	0	6	0	0	0
Pqbp1	0	0	0	0	0	2	0	0	0
Rims4	0	0	0	0	0	0	0	1	0
Gm15697	0	0	2	0	0	0	0	0	0
Slc44a2	0	0	5	0	0	39	0	9	0
Slc19a2	0	0	0	0	0	8	0	0	0
Zfp35	1	0	0	0	0	1	0	0	0
Gm17040	0	0	0	0	0	4	12	15	0
Dmkn	0	0	0	0	0	0	0	2	0
Gm12260	0	0	0	0	0	1	0	0	0
Hsp90b1	0	0	0	0	0	2	0	0	0
Svil	0	0	0	0	0	7	0	0	0
Pklr	0	0	0	0	0	7	0	0	0
Csk	0	0	5	0	0	25	0	0	0
Gm4524	1	0	0	0	0	0	0	0	0
Kif7	0	0	0	0	0	1	0	0	0
Secisbp2l	0	0	0	0	0	13	0	0	0
Frs3	1	0	0	0	0	14	0	0	0
Gm8909	1	0	0	0	0	0	0	0	0
Ubp1	0	0	0	0	0	6	0	0	0
Crlf3	3	0	0	0	0	0	0	0	0
Gm12404	0	0	0	0	0	0	0	3	0
Gm12854	0	3	0	0	0	3	15	0	0
Tff2	0	0	0	0	0	4	0	0	0
Kifc5b	1	0	0	0	0	15	0	0	0
Arhgap24	4	0	0	0	0	0	0	0	0
Tmem170b	0	0	0	0	0	27	0	0	0
AC116595.1	0	0	0	0	0	4	0	8	0
D8Ertd82e	0	0	0	0	0	1	3	0	0
Steap2	0	0	0	0	0	5	0	0	0
Tsga10	0	0	0	0	0	4	0	0	0
Aifm1	0	0	0	0	0	12	0	0	0
Tmem55a	0	0	0	0	0	3	0	0	0
Gm14321	0	0	0	0	0	1	0	8	0
Treml1	0	0	0	0	0	4	0	1	0
Mex3a	0	0	0	0	0	1	0	21	0
Gm12206	0	0	0	0	0	1	0	0	0
2900005J15Rik	0	0	0	0	0	3	0	0	0
Mir3074	0	0	0	0	0	8	0	0	0
Fam119b	0	0	0	0	0	7	0	0	0
A530083I20Rik	1	0	0	0	0	0	0	0	0
Cgref1	0	0	0	0	0	2	0	0	0
Aatf	11	0	0	0	0	0	0	0	0
Esrp1	1	0	0	0	0	0	0	0	0
Nr1h4	1	0	0	0	0	0	0	0	0
Fbxo47	1	0	0	0	0	5	0	1	0
1190002N15Rik	0	0	0	0	0	0	0	11	0
Ftsj3	10	0	0	0	0	12	0	0	0
Gm12711	0	0	0	0	0	0	0	1	0
Gm15265	3	0	0	0	0	0	0	0	0
Ift172	0	0	0	0	0	10	0	0	0
Tbc1d8	0	0	0	0	0	20	0	0	0
Gm10101	0	0	0	0	0	2	0	0	0
Ccdc41	0	0	0	0	0	1	0	4	0
Twist2	0	0	0	0	0	4	0	0	0
Pdcd2	0	0	0	0	0	6	0	0	0
Cage1	3	0	0	0	0	3	0	0	0
Haao	0	0	0	0	0	1	0	0	0
Fam136a	0	0	0	0	0	4	0	0	0
Gm4262	0	0	0	0	0	1	1	0	0
Map4k2	0	0	0	0	0	0	0	4	0
Ccbl1	0	0	0	0	0	4	0	0	0
Gm6153	0	0	0	0	0	1	0	6	0
Cd300lb	0	0	0	0	0	17	0	13	0
Lactb	0	0	0	0	0	27	0	0	0
Slc1a4	0	0	0	0	0	2	0	0	0
Iqsec1	0	0	0	0	0	35	0	0	0
Gm16120	0	0	0	0	0	3	0	3	0
Wdr86	0	0	0	0	0	16	0	0	0
Syngr3	2	0	0	0	0	10	0	0	0
AC151602.1	3	0	0	0	0	0	0	0	0
C030044B11Rik	0	0	0	0	0	1	0	0	0
Trmt6	0	0	0	0	0	7	0	0	0
Kdsr	0	0	0	0	0	6	0	0	0
Mettl1	0	0	1	0	0	17	0	0	0
Fbxw5	0	0	0	0	0	7	3	0	0
Gm13297	0	0	0	0	0	1	0	0	0
Gm11427	0	0	0	0	0	14	5	19	0
Ptpn12	0	0	0	0	0	20	0	2	0
Zfp326	0	0	0	0	0	2	0	0	0
Gm13857	0	0	0	0	0	2	0	0	0
Gm13464	0	0	0	0	0	0	0	1	0
Pla2g16	0	0	5	0	0	0	0	0	0
Ern1	10	0	0	0	0	13	0	0	0
Gm14015	2	0	0	0	0	0	0	0	0
Ube2r2	0	0	0	0	0	8	0	2	0
Sema3c	0	0	0	0	0	0	0	2	0
Dhrs1	1	0	0	0	0	0	0	16	0
Mtdh	0	0	0	0	0	1	0	0	0
Gm13478	3	0	0	0	0	0	0	0	0
Marcks	0	0	0	0	0	13	0	0	0
Gm16336	0	0	0	0	0	3	0	1	0
snoU6	0	0	0	0	0	3	0	0	0
Arid2	0	0	0	0	0	0	0	1	0
Abhd11	1	0	0	0	0	0	0	5	0
4921514A10Rik	0	0	0	0	0	1	0	0	0
Nudt14	0	0	0	0	0	77	0	5	0
Gm14169	0	0	0	0	0	2	0	0	0
Qtrt1	0	0	7	0	0	39	0	11	0
Rara	0	0	0	0	0	0	0	1	0
Gm8459	0	0	0	0	0	3	0	0	0
Myst4	2	0	0	0	0	20	0	0	0
AI848100	2	0	0	0	0	6	0	0	0
Gm216	0	0	0	0	0	6	0	0	0
Erich1	0	0	0	0	0	1	0	0	0
Naif1	0	0	0	0	0	8	0	10	0
4930426L09Rik	0	0	0	0	0	46	0	0	0
Triobp	0	0	4	0	0	16	0	3	0
C130039O16Rik	10	0	0	0	0	0	0	0	0
Gm3086	0	0	0	0	0	1	0	0	0
Lpar2	7	0	0	0	0	0	0	0	0
Tmprss9	0	0	0	0	0	14	0	0	0
Npr1	0	0	0	0	0	14	0	0	0
Cep57l1	0	0	0	0	0	17	0	8	0
Wdsub1	0	0	0	0	0	10	0	8	0
Lat	0	0	0	0	0	1	0	0	0
Csf1	4	0	6	0	0	43	41	5	0
Clec4a3	0	0	0	0	0	13	0	1	0
Spry2	0	0	2	0	0	7	0	0	0
Mrpl24	0	0	0	0	0	7	0	0	0
Pias4	0	0	0	0	0	12	0	0	0
Eif3l	0	0	1	0	0	14	0	1	0
Gm15487	0	0	0	0	0	18	0	0	0
Bcar1	0	0	0	0	0	1	0	0	0
Il2ra	0	0	0	0	0	2	0	0	0
Gm15962	0	0	1	0	0	0	0	1	0
Ppp1r12c	2	0	0	0	0	1	0	0	0
Tmsb4x	0	0	0	0	0	18	0	0	0
Calm3	0	0	0	0	0	9	0	6	0
Gm7325	1	0	0	0	0	1	0	1	0
Gm11369	0	0	0	0	0	3	0	0	0
Gm17409	0	0	0	0	0	4	0	0	0
Gm13509	0	0	0	0	0	5	0	0	0
Napb	0	0	0	0	0	7	0	2	0
Olfr1532	0	0	0	0	0	1	0	0	0
Eif4b	10	0	0	0	0	0	0	0	0
AL596123.1	1	0	0	0	0	2	0	0	0
Atp6v0d2	0	0	0	0	0	2	0	0	0
Ninl	0	0	0	0	0	6	0	0	0
Hes1	0	0	0	0	0	19	0	0	0
Stk24	0	0	0	0	0	36	12	0	0
Idh3b	0	0	0	0	0	4	0	0	0
Farp2	0	0	0	0	0	3	0	0	0
Sav1	0	0	0	0	0	2	0	0	0
Ms4a7	0	0	0	0	0	5	0	8	0
Gm11837	0	0	0	0	0	2	0	0	0
1700121C08Rik	0	0	0	0	0	0	0	1	0
Glt25d2	0	0	0	0	0	1	0	2	0
Chd6	2	0	0	0	0	0	0	0	0
Spon1	0	0	0	0	0	1	0	11	0
Gng12	0	0	0	0	0	24	0	0	0
Gata6	0	0	0	0	0	6	0	0	0
1700028K03Rik	0	0	0	0	0	1	0	0	0
Sash1	0	0	0	0	0	3	0	5	0
Zdhhc7	0	0	0	0	0	10	8	0	0
A730036I17Rik	0	0	0	0	0	3	0	0	0
Gm11970	0	1	0	0	0	6	0	4	0
Eif5a	0	0	0	0	0	29	0	0	0
Chst4	0	0	0	0	0	1	0	0	0
Gm12356	0	0	0	0	0	0	0	2	0
Itgal	0	0	0	0	0	0	0	9	0
Gm16301	0	0	0	0	0	0	0	2	0
Pnpla1	0	0	0	0	0	10	0	2	0
Gm10797	0	0	0	0	0	0	0	1	0
Car13	19	0	8	0	0	0	0	0	0
Rinl	0	0	0	0	0	12	0	15	0
Ufsp1	0	0	0	0	0	4	0	0	0
Cct7	0	0	0	0	0	22	0	0	0
Aldoc	0	0	0	0	0	1	0	0	0
Plvap	0	0	0	0	0	9	4	1	0
Dzip1l	8	0	1	0	0	0	0	0	0
Rnf130	2	0	0	0	0	0	0	0	0
F2	2	0	0	0	0	1	0	0	0
Mfsd4	0	0	0	0	0	4	13	0	0
Tmed5	4	0	0	0	0	0	0	0	0
Mospd4	0	0	0	0	0	12	0	0	0
Armc3	0	0	0	0	0	3	0	0	0
1700106N22Rik	0	0	0	0	0	1	0	0	0
Gm5316	0	0	0	0	0	26	0	2	0
Sun1	0	0	0	0	0	11	0	11	0
Gpr19	0	0	0	0	0	24	0	0	0
Gm14248	0	0	0	0	0	1	0	0	0
Lpcat1	0	0	0	0	0	1	0	0	0
Mcpt4	0	0	0	0	0	0	0	2	0
Hif1a	0	0	0	0	0	9	0	15	0
Shisa2	0	0	0	0	0	0	0	1	0
Fut2	3	0	0	0	0	0	0	0	0
Ccdc64b	0	0	0	0	0	0	6	0	0
Nap1l4	0	0	0	0	0	2	0	0	0
Sypl2	7	0	2	0	0	0	0	0	0
Zfp532	0	0	0	0	0	6	0	0	0
Pdpn	2	0	0	0	0	1	0	0	0
Lmod3	0	0	0	0	0	10	2	0	0
Eid2b	0	0	0	0	0	15	0	23	0
Gm9799	0	0	0	0	0	1	0	0	0
Tmem30c	0	0	28	0	0	11	0	1	0
Pick1	0	0	0	0	0	12	0	0	0
Dusp22	0	0	0	0	0	15	0	0	0
Hcn2	0	0	4	0	0	2	0	13	0
Wipi1	0	0	0	0	0	6	0	2	0
Hspg2	0	0	0	0	0	14	19	4	0
Gm17030	0	0	0	0	0	1	0	0	0
Gm9917	0	0	0	0	0	2	2	6	0
Itpr3	1	0	0	0	0	17	0	0	0
Gm15375	0	0	0	0	0	1	0	0	0
Pax3	0	0	0	0	0	1	0	0	0
2700038G22Rik	1	0	0	0	0	0	0	0	0
Coq4	0	0	0	0	0	28	0	0	0
Gm4462	0	0	0	0	0	3	0	0	0
Ndufa3	0	0	0	0	0	1	0	0	0
Ttc17	0	0	0	0	0	0	0	1	0
Paxip1	0	0	3	0	0	0	0	0	0
Gm5809	0	0	0	0	0	2	0	0	0
Meig1	15	0	0	0	0	0	0	0	0
Gm11460	0	0	0	0	0	3	3	0	0
Mogat2	0	0	0	0	0	4	0	0	0
Gm13875	0	0	2	0	0	5	0	8	0
Gm2245	0	0	0	0	0	4	0	4	0
Mpz	0	0	0	0	0	4	0	0	0
5	0	0	0	0	0	4	0	0	0
Pmf1	0	0	0	0	0	4	0	21	0
Jam3	0	0	0	0	0	0	0	3	0
Fbxl21	0	0	0	0	0	3	0	0	0
Tpm4	0	0	0	0	0	17	0	0	0
Dnase1l2	0	0	0	0	0	10	0	0	0
2410012M07Rik	0	0	0	0	0	1	0	0	0
Cryl1	0	0	0	0	0	2	0	0	0
Olfr70	0	0	0	0	0	0	0	3	0
Golph3	0	0	0	0	0	5	0	0	0
Aggf1	0	0	0	0	0	16	0	0	0
Gm15123	0	0	0	0	0	2	0	0	0
Rrbp1	0	0	0	0	0	2	0	0	0
Hist2h4	0	0	0	0	0	12	0	0	0
Pi4k2b	0	0	0	0	0	4	0	0	0
F630043A04Rik	0	0	0	0	0	11	0	0	0
Polr3k	1	0	0	0	0	0	0	0	0
Acd	6	0	6	0	0	6	0	5	0
Metap1	0	0	13	0	0	2	0	0	0
Clk3	2	0	1	0	0	8	0	0	0
Aldh16a1	4	0	0	0	0	2	0	0	0
Rab11a	0	0	0	0	0	1	0	0	0
1700030F18Rik	0	0	2	0	0	0	0	1	0
Slc25a15	2	0	4	0	0	0	0	0	0
Arhgef17	0	0	2	0	0	6	0	27	0
Obfc2b	1	0	0	0	0	3	0	0	0
Eya2	0	0	0	0	0	9	9	0	0
Gm16266	0	0	0	0	0	3	0	0	0
Ttc38	5	0	0	0	0	28	0	3	0
Gm4117	0	1	0	0	0	0	0	0	0
Slc6a13	0	0	0	0	0	0	0	2	0
Sh3rf1	0	0	0	0	0	2	0	0	0
Islr	5	0	0	0	0	0	0	0	0
Slfn1	0	0	0	0	0	19	9	38	0
Carm1	0	0	0	0	0	28	0	12	0
Ush2a	1	0	0	0	0	0	0	0	0
Atg10	0	0	0	0	0	3	0	0	0
Slc17a1	0	0	0	0	0	1	0	0	0
Mapk14	0	0	0	0	0	83	2	1	0
Xrcc6	0	0	0	0	0	4	0	0	0
Prss8	0	0	0	0	0	1	7	0	0
A230028O05Rik	0	0	0	0	0	7	0	0	0
Gm17060	0	0	0	0	0	0	0	4	0
5033423K11Rik	0	0	0	0	0	1	1	0	0
Rock2	0	0	0	0	0	5	0	0	0
Tcea3	0	0	0	0	0	2	0	0	0
Gm16148	0	0	0	0	0	6	0	4	0
Mir125a	0	0	0	0	0	1	0	0	0
Sparc	0	0	0	0	0	23	0	4	0
Cyp2b13	0	0	0	0	0	0	0	1	0
Gm20394	0	0	1	0	0	0	0	0	0
Gm15345	0	0	0	0	0	1	0	0	0
Gm11514	1	0	0	0	0	3	0	0	0
Gm5258	0	0	0	0	0	1	0	0	0
Ptpro	0	0	0	0	0	2	0	5	0
Narg2	0	0	0	0	0	6	0	14	0
Rnf149	0	0	0	0	0	18	0	9	0
Tet3	0	0	0	0	0	10	0	0	0
Gm15428	0	0	0	0	0	4	0	0	0
6720456H20Rik	0	0	0	0	0	8	0	0	0
Ostc	0	1	0	0	0	0	0	0	0
Slc10a1	0	0	0	0	0	0	0	7	0
Traj31	0	0	0	0	0	0	1	0	0
Rnf138	0	0	0	0	0	13	0	0	0
Hist1h2bb	0	0	0	0	0	2	0	0	0
Gm6277	0	0	0	0	0	3	0	0	0
Mgst2	0	0	0	0	0	2	0	0	0
Adsl	0	0	0	0	0	33	0	60	0
Abcg3	0	0	0	0	0	0	8	8	0
Map3k2	1	0	0	0	0	6	0	0	0
Kcns3	0	0	0	0	0	1	0	0	0
Uckl1	1	0	0	0	0	0	7	0	0
0610040F04Rik	0	0	0	0	0	1	0	0	0
Traj54	0	0	0	0	0	0	1	0	0
Bcan	0	0	0	0	0	4	0	1	0
Foxm1	0	0	0	0	0	15	0	1	0
G630090E17Rik	0	0	0	0	0	1	0	0	0
Arntl2	0	0	0	0	0	1	0	0	0
Mgp	0	0	0	0	0	14	1	25	0
Sgpl1	0	0	0	0	0	12	0	12	0
Zfp187	0	8	0	0	0	0	0	0	0
Zfp553	0	0	0	0	0	0	0	9	0
Gm16114	0	0	0	0	0	1	0	0	0
Dag1	11	0	0	0	0	1	0	3	0
Wnt2b	0	0	0	0	0	2	0	0	0
Hps6	0	0	0	0	0	10	0	0	0
Zfp74	0	0	0	0	0	2	0	0	0
Jak2	4	0	6	0	0	0	0	0	0
Sestd1	0	0	0	0	0	12	0	0	0
Mmp9	0	0	0	0	0	5	0	0	0
Specc1	0	0	0	0	0	4	2	0	0
Slc6a2	3	0	6	0	0	6	0	0	0
0610011L14Rik	0	0	0	0	0	13	0	0	0
Tmem143	1	0	0	0	0	0	0	0	0
Ak3	4	0	6	0	0	2	0	0	0
Agtr1a	0	0	0	0	0	1	0	0	0
E330034G19Rik	0	0	0	0	0	4	0	0	0
Gm6286	0	0	0	0	0	2	0	5	0
SNORA72	0	0	0	0	0	1	0	0	0
6530418L21Rik	1	0	0	0	0	0	0	0	0
Gcm2	0	0	0	0	0	2	0	0	0
Mir26a	0	0	0	0	0	1	0	0	0
[truncated: 14,350 more rows]

## Sheet: SuppTable3e
Supplemental Table 3e: Location of enhancer LAAsP-mods linked to LAAsP genes for '5mo Adult Veh over 3wk Weanling Veh' comparison (Figure 4c)
Gene_symbol	Log2 FC	Enhancer anchor coordinates (mm10)	Individual Mark contributions (mark_direction:#enhancers per anchor)
Moxd1	10.9795	chr10_24223864_24224514	27me3_down:2;4me3_up:2
Moxd1	10.9795	chr10_24155384_24167404	4me3_up:7
Moxd1	10.9795	chr10_24532604_24536394	4me3_up:1
Moxd1	10.9795	chr10_24131874_24133984	4me3_up:1
Mup21	8.13185	chr4_62086166_62088006	4me3_up:1;27ac_up:1
Mup21	8.13185	chr4_62085466_62085926	4me3_up:1;27ac_up:1
Mup21	8.13185	chr4_62083996_62085256	27ac_up:1
Mup21	8.13185	chr4_62083066_62083826	27ac_up:1
Mup21	8.13185	chr4_62022856_62026136	27ac_up:1
Cyp4a12a	7.93263	chr4_115262195_115268405	4me1_up:1;27ac_up:1
Cyp4a12a	7.93263	chr4_115056215_115058545	27me3_down:1
Cyp4a12a	7.93263	chr4_115603105_115603415	4me3_up:1
Cyp4a12a	7.93263	chr4_115641985_115647515	4me3_up:1
Cyp4a12a	7.93263	chr4_115600745_115602895	4me3_up:1
Cyp4a12a	7.93263	chr4_115280045_115280925	27ac_up:1
Cyp4a12a	7.93263	chr4_115278115_115278785	27ac_up:1
Cyp4a12b	7.86739	chr4_115262195_115268405	4me1_up:1;27ac_up:1
Cyp4a12b	7.86739	chr4_115056215_115058545	27me3_down:2
Cyp4a12b	7.86739	chr4_115603105_115603415	4me3_up:1
Cyp4a12b	7.86739	chr4_115641985_115647515	4me3_up:2
Cyp4a12b	7.86739	chr4_115600745_115602895	4me3_up:1
Mup20	7.51704	chr4_62086166_62088006	4me3_up:1;27ac_up:1
Mup20	7.51704	chr4_62085466_62085926	4me3_up:1;27ac_up:1
Mup20	7.51704	chr4_62083996_62085256	27ac_up:1
Mup20	7.51704	chr4_62083066_62083826	27ac_up:1
Mup20	7.51704	chr4_62022856_62026136	27ac_up:1
Elovl3	7.49924	chr19_46087730_46088700	4me1_up:1;27ac_up:1
Elovl3	7.49924	chr19_46313790_46314170	27me3_down:1
Elovl3	7.49924	chr19_46316070_46319470	27me3_down:3
Elovl3	7.49924	chr19_46320960_46322050	27me3_down:1
Elovl3	7.49924	chr19_46314330_46314460	27me3_down:1
Elovl3	7.49924	chr19_46314530_46314610	27me3_down:1
Elovl3	7.49924	chr19_46314800_46316030	27me3_down:1
Elovl3	7.49924	chr19_46454840_46461290	4me3_up:2
Elovl3	7.49924	chr19_46197980_46201110	27ac_up:2
Saa2	6.27771	chr7_46741390_46742430	27ac_up:1
Nat8	6.25231	chr6_85820426_85822066	4me1_up:2;27ac_up:2
Nat8	6.25231	chr6_85843306_85852606	4me1_up:3;4me3_up:2;27ac_up:3
Nat8	6.25231	chr6_85860286_85865416	4me3_up:1;27ac_up:3
Nat8	6.25231	chr6_85868916_85869026	4me3_up:1;27ac_up:1
Nat8	6.25231	chr6_85868446_85868776	4me3_up:1;27ac_up:1
Nat8	6.25231	chr6_85831216_85831786	27ac_up:1
Nat8	6.25231	chr6_85853006_85855006	27ac_up:2
Nat8	6.25231	chr6_85936656_85937406	27ac_up:1
Cyp7b1	6.03049	chr3_18213590_18214150	4me1_up:1
Cyp7b1	6.03049	chr3_18205050_18206640	4me1_up:2
Cyp7b1	6.03049	chr3_18214180_18216700	4me1_up:2
Cyp7b1	6.03049	chr3_18246350_18247360	4me1_up:1;27ac_up:1
Cyp7b1	6.03049	chr3_18251280_18251600	4me1_up:1;27ac_up:1
Cyp7b1	6.03049	chr3_18298250_18300720	4me1_up:2;27ac_up:2
Cyp7b1	6.03049	chr3_18190900_18191610	27ac_up:1
Capn8	5.62863	chr1_182608349_182611079	4me1_up:1;27ac_up:1
Capn8	5.62863	chr1_182492869_182507869	4me3_up:13
Grm8	5.60213	chr6_28031760_28032390	4me1_up:1;27ac_up:1
Grm8	5.60213	chr6_28395440_28398660	27me3_down:1
Grm8	5.60213	chr6_28132870_28134290	27me3_down:4;4me3_up:4;27ac_up:4
Trhde	5.57063	chr10_114791454_114800514	4me1_up:3;27me3_down:2;27ac_up:2
Nox4	5.41624	chr7_87246900_87247480	4me1_up:6;4me3_up:6;27ac_up:6
Nox4	5.41624	chr7_87247580_87248290	4me1_up:2;4me3_up:2;27ac_up:2
Ugt2b38	5.41389	chr5_87339595_87340845	4me1_up:1;4me3_up:1;27ac_up:1
Ugt2b38	5.41389	chr5_87347465_87348335	27ac_up:1
Slc15a5	5.20703	chr6_138140599_138150759	4me3_up:10
Scara5	5.18106	chr14_65710443_65729583	4me1_up:4;4me3_up:3;27ac_up:9
Scara5	5.18106	chr14_65738503_65740283	4me1_up:1;27ac_up:1
Scara5	5.18106	chr14_65742173_65743133	4me1_up:2;27ac_up:2
Scara5	5.18106	chr14_65670673_65689763	4me1_up:5;27ac_up:1
Scara5	5.18106	chr14_65973473_65974143	4me1_up:1;4me3_up:1
Scara5	5.18106	chr14_65968683_65971723	4me1_up:1;4me3_up:1
Scara5	5.18106	chr14_65666743_65670553	4me1_up:1;4me3_up:2;27ac_up:2
Scara5	5.18106	chr14_65780183_65784663	4me1_up:1;27ac_up:1
Scara5	5.18106	chr14_65786393_65794683	4me1_up:1;27ac_up:1
Scara5	5.18106	chr14_65773343_65773823	4me1_up:1;27ac_up:1
Scara5	5.18106	chr14_65740383_65742123	4me1_up:1;27ac_up:1
Scara5	5.18106	chr14_66254323_66280873	4me3_up:1;27ac_up:1
Scara5	5.18106	chr14_66110653_66112183	4me3_up:1
Scara5	5.18106	chr14_66116793_66124253	4me3_up:1
Saa1	5.16277	chr7_46741390_46742430	27ac_up:1
Tiam2	4.64222	chr17_3490140_3492150	4me1_up:2;4me3_up:2;27ac_up:2
Tiam2	4.64222	chr17_3326720_3342520	27me3_down:11
Tiam2	4.64222	chr17_3456250_3469380	4me3_up:6;27ac_up:7
Tiam2	4.64222	chr17_3487130_3489360	4me3_up:1;27ac_up:1
Tiam2	4.64222	chr17_3493880_3496170	27ac_up:1
Lad1	4.57881	chr1_135819013_135825753	4me1_up:14;27me3_down:14;4me3_up:14;27ac_up:14
Lad1	4.57881	chr1_135577553_135584553	27me3_down:8
Lad1	4.57881	chr1_135506533_135519473	4me3_up:7
Lad1	4.57881	chr1_136227653_136233893	4me3_up:1
Lad1	4.57881	chr1_136131753_136144593	4me3_up:8
Lad1	4.57881	chr1_136324993_136335443	4me3_up:1
Hspb1	4.55337	chr5_135879310_135880440	4me1_up:1
Hspb1	4.55337	chr5_135944640_135960220	4me3_up:8
Hspb1	4.55337	chr5_135903520_135904210	4me3_up:1
Hspb1	4.55337	chr5_135889560_135894050	4me3_up:10;27ac_up:6
Hspb1	4.55337	chr5_136102660_136103270	4me3_up:3
Hspb1	4.55337	chr5_135904850_135906410	4me3_up:1
Hspb1	4.55337	chr5_136101680_136101940	4me3_up:1
Hspb1	4.55337	chr5_135877160_135877910	4me3_up:1;27ac_up:1
Hspb1	4.55337	chr5_135742390_135744040	27ac_up:8
Hspb1	4.55337	chr5_135740430_135741960	27ac_up:2
Hspb1	4.55337	chr5_135742080_135742280	27ac_up:1
Orm2	4.40438	chr4_63345206_63345416	4me1_up:1;4me3_up:1;27ac_up:1
Orm2	4.40438	chr4_63345486_63346036	4me1_up:2;4me3_up:2;27ac_up:2
Orm2	4.40438	chr4_63341166_63343496	4me1_up:1;4me3_up:1;27ac_up:1
Orm2	4.40438	chr4_63710116_63724596	27me3_down:2
Orm2	4.40438	chr4_63344706_63345066	4me3_up:3;27ac_up:3
Orm2	4.40438	chr4_63356306_63356566	4me3_up:1;27ac_up:1
Orm2	4.40438	chr4_63356706_63356906	4me3_up:1;27ac_up:1
Orm2	4.40438	chr4_63150436_63151446	4me3_up:1
Orm2	4.40438	chr4_63151526_63152576	4me3_up:1
Orm2	4.40438	chr4_63359386_63360696	27ac_up:1
Orm2	4.40438	chr4_63356976_63357536	27ac_up:1
Orm2	4.40438	chr4_63365876_63367116	27ac_up:1
Orm2	4.40438	chr4_63338856_63339876	27ac_up:1
Orm2	4.40438	chr4_63357646_63357786	27ac_up:1
Serpina12	4.39961	chr12_104066940_104067950	4me3_up:3
Hsd3b5	4.16039	chr3_98779877_98787477	4me3_up:1
Mup3	3.98306	chr4_62085466_62085926	4me3_up:1;27ac_up:1
Mup3	3.98306	chr4_62083996_62085256	27ac_up:1
Mup3	3.98306	chr4_62022856_62026136	27ac_up:1
Mup3	3.98306	chr4_62083066_62083826	27ac_up:1
Susd4	3.82214	chr1_182608349_182611079	4me1_up:2;27ac_up:2
Susd4	3.82214	chr1_182492869_182507869	4me3_up:1
Susd4	3.82214	chr1_182386349_182386929	4me3_up:1
Susd4	3.82214	chr1_182765179_182766089	27ac_up:8
Slco1a1	3.73599	chr6_141940289_141940829	4me1_up:1
Omd	3.65507	chr13_49582811_49587631	4me1_up:4;4me3_up:4;27ac_up:7
Omd	3.65507	chr13_49576421_49582741	4me3_up:10;27ac_up:10
Lrp2	3.37236	chr2_69822633_69823783	4me1_up:4
Lrp2	3.37236	chr2_69414293_69415503	4me3_up:1
Ces1f	3.31313	chr8_93478320_93479000	4me1_up:1;27ac_up:1
Ces1f	3.31313	chr8_93263391_93264051	4me1_up:1;27ac_up:1
Ces1f	3.31313	chr8_93261141_93262111	4me1_up:2;27ac_up:2
Ces1f	3.31313	chr8_93227701_93229361	4me3_up:3;27ac_up:3
Ces1f	3.31313	chr8_92855621_92859581	4me3_up:1
Ces1f	3.31313	chr8_93333731_93335011	27ac_up:1
Ces1f	3.31313	chr8_93335221_93337101	27ac_up:1
Ces1f	3.31313	chr8_93252561_93253151	27ac_up:1
Srd5a1	3.3051	chr13_69623542_69625942	4me1_up:1;27ac_up:1
Srd5a1	3.3051	chr13_69594592_69594912	4me1_up:1;27ac_up:1
Srd5a1	3.3051	chr13_69631312_69631522	4me1_up:1;27ac_up:1
Srd5a1	3.3051	chr13_69595012_69595812	4me1_up:1;27ac_up:1
Srd5a1	3.3051	chr13_69631662_69632422	4me1_up:1;27ac_up:1
Srd5a1	3.3051	chr13_69630762_69631232	4me1_up:1;27ac_up:1
Srd5a1	3.3051	chr13_69729402_69738552	27me3_down:3
Srd5a1	3.3051	chr13_69607462_69610962	4me3_up:12;27ac_up:12
Srd5a1	3.3051	chr13_69612452_69612932	27ac_up:8
Srd5a1	3.3051	chr13_69613042_69615402	27ac_up:5
Srd5a1	3.3051	chr13_69612182_69612292	27ac_up:4
Serpine2	3.19489	chr1_79847325_79854975	27ac_up:2
Pigr	3.10762	chr1_131182253_131200103	4me1_up:1;27ac_up:1
Pigr	3.10762	chr1_130758963_130769333	4me3_up:6
Pigr	3.10762	chr1_131065983_131097283	4me3_up:4;27ac_up:5
Pigr	3.10762	chr1_130658823_130661443	4me3_up:2
Pigr	3.10762	chr1_130826093_130834363	4me3_up:2;27ac_up:3
Pigr	3.10762	chr1_130865893_130867433	4me3_up:2
Pigr	3.10762	chr1_130834463_130841493	27ac_up:3
Clstn3	3.0749	chr6_124561662_124562302	4me1_up:1;27ac_up:1
Clstn3	3.0749	chr6_124998482_124998602	27me3_down:1
Clstn3	3.0749	chr6_124999732_125000652	27me3_down:1
Clstn3	3.0749	chr6_124855272_124855942	27me3_down:1
Clstn3	3.0749	chr6_124859212_124859482	27me3_down:1
Clstn3	3.0749	chr6_124996932_124998432	27me3_down:1
Clstn3	3.0749	chr6_124998972_124999232	27me3_down:1
Clstn3	3.0749	chr6_124862122_124863662	27me3_down:2
Clstn3	3.0749	chr6_124998672_124998912	27me3_down:1
Clstn3	3.0749	chr6_124451862_124454242	4me3_up:3;27ac_up:3
Clstn3	3.0749	chr6_124432152_124436812	4me3_up:1;27ac_up:3
Clstn3	3.0749	chr6_124450752_124451302	27ac_up:1
Clstn3	3.0749	chr6_124449922_124450702	27ac_up:2
Clstn3	3.0749	chr6_124457372_124457852	27ac_up:2
Clstn3	3.0749	chr6_124449632_124449772	27ac_up:1
Clstn3	3.0749	chr6_124458132_124458542	27ac_up:1
Clstn3	3.0749	chr6_124447732_124449482	27ac_up:1
Clstn3	3.0749	chr6_124431732_124431952	27ac_up:2
Clstn3	3.0749	chr6_124425062_124430752	27ac_up:5
Clstn3	3.0749	chr6_124458722_124459152	27ac_up:1
Clstn3	3.0749	chr6_124436952_124437372	27ac_up:1
Sytl1	2.88201	chr4_133261075_133262985	4me1_up:7;4me3_up:7;27ac_up:7
Sytl1	2.88201	chr4_133078105_133120625	4me3_up:70
Sytl1	2.88201	chr4_132954665_132964085	4me3_up:18
Sytl1	2.88201	chr4_133012285_133055005	4me3_up:28;27ac_up:18
Sytl1	2.88201	chr4_132944005_132947965	4me3_up:3
Sytl1	2.88201	chr4_132974265_132984145	4me3_up:5
Sytl1	2.88201	chr4_133256575_133258985	27ac_up:6
Srgap3	2.87699	chr6_112835206_112895936	27me3_down:9
Gpc1	2.86531	chr1_92847043_92850373	27me3_down:5
Gpc1	2.86531	chr1_92723143_92735723	27ac_up:2
Gpc1	2.86531	chr1_92707633_92716363	27ac_up:5
Gpc1	2.86531	chr1_92717773_92722463	27ac_up:3
Gpc1	2.86531	chr1_92768213_92777133	27ac_up:1
Gpc1	2.86531	chr1_92902593_92902823	27ac_up:1
Hamp	2.85534	chr7_31040311_31041391	4me3_up:3
Hamp	2.85534	chr7_31114741_31115131	4me3_up:1
Hamp	2.85534	chr7_31110991_31114671	4me3_up:3
Hamp	2.85534	chr7_31108411_31108961	4me3_up:1
Hamp	2.85534	chr7_31110771_31110861	4me3_up:1
Hamp	2.85534	chr7_30820281_30820671	4me3_up:1
Hamp	2.85534	chr7_30820971_30821041	4me3_up:1
Hamp	2.85534	chr7_31125221_31127561	27ac_up:3
Hamp	2.85534	chr7_30688411_30691261	27ac_up:1
Dct	2.85129	chr14_118413668_118416968	27me3_down:3
Dct	2.85129	chr14_118237028_118237148	27me3_down:1
Dct	2.85129	chr14_118221788_118226228	27me3_down:2
Slc41a2	2.82554	chr10_83325795_83338155	4me1_up:7;4me3_up:2;27ac_up:4
Slc41a2	2.82554	chr10_83319635_83325785	4me3_up:7;27ac_up:7
Slc41a2	2.82554	chr10_82812355_82815605	27ac_up:1
Slc41a2	2.82554	chr10_83310455_83312165	27ac_up:1
Serpina1e	2.75051	chr12_104066940_104067950	4me3_up:1
Cadm4	2.68478	chr7_24637251_24638421	27me3_down:1
Cadm4	2.68478	chr7_24462561_24465121	4me3_up:17
Cadm4	2.68478	chr7_24482161_24489611	27ac_up:8
C9	2.66739	chr15_6518070_6531080	4me3_up:2
Ces3b	2.66468	chr8_105000210_105001500	4me1_up:1;27ac_up:1
Ces3b	2.66468	chr8_104997780_104999680	4me1_up:1;27ac_up:1
Ces3b	2.66468	chr8_105054500_105055270	27ac_up:1
Ces3b	2.66468	chr8_105045900_105047110	27ac_up:1
Cebpe	2.65382	chr14_54924603_54925433	27me3_down:1;27ac_up:1
Cebpe	2.65382	chr14_54719573_54720293	4me3_up:1;27ac_up:1
Cebpe	2.65382	chr14_54720323_54721423	4me3_up:1;27ac_up:1
Cebpe	2.65382	chr14_54875823_54877753	27ac_up:1
Orm1	2.63005	chr4_63345206_63345416	4me1_up:1;4me3_up:1;27ac_up:1
Orm1	2.63005	chr4_63345486_63346036	4me1_up:1;4me3_up:1;27ac_up:1
Orm1	2.63005	chr4_63341166_63343496	4me1_up:1;4me3_up:1;27ac_up:1
Orm1	2.63005	chr4_63344706_63345066	4me3_up:3;27ac_up:3
Orm1	2.63005	chr4_63356306_63356566	4me3_up:1;27ac_up:1
Orm1	2.63005	chr4_63356706_63356906	4me3_up:1;27ac_up:1
Orm1	2.63005	chr4_63150436_63151446	4me3_up:2
Orm1	2.63005	chr4_63151526_63152576	4me3_up:2
Orm1	2.63005	chr4_63359386_63360696	27ac_up:1
Orm1	2.63005	chr4_63356976_63357536	27ac_up:1
Orm1	2.63005	chr4_63361586_63362966	27ac_up:3
Orm1	2.63005	chr4_63338856_63339876	27ac_up:1
Orm1	2.63005	chr4_63357646_63357786	27ac_up:1
Gm14327	2.61284	chr2_178071515_178078355	4me3_up:3
Gm14327	2.61284	chr2_177897125_177900745	4me3_up:1;27ac_up:1
Gm14327	2.61284	chr2_177498315_177501735	27ac_up:2
Osbpl3	2.60804	chr6_50803041_50803811	4me1_up:1
Osbpl3	2.60804	chr6_50371591_50382781	4me3_up:25;27ac_up:25
Osbpl3	2.60804	chr6_50382831_50401461	4me3_up:9;27ac_up:11
Osbpl3	2.60804	chr6_50353101_50369361	27ac_up:6
Ces2c	2.5985	chr8_105000210_105001500	4me1_up:3;27ac_up:3
Ces2c	2.5985	chr8_104997780_104999680	4me1_up:1;27ac_up:1
Ces2c	2.5985	chr8_105045900_105047110	27ac_up:1
Ces2c	2.5985	chr8_105054500_105055270	27ac_up:1
Plekhb1	2.5826	chr7_100657596_100659006	4me3_up:5;27ac_up:4
Plekhb1	2.5826	chr7_101003746_101011706	4me3_up:3
Plekhb1	2.5826	chr7_100959446_100961906	4me3_up:1
Plekhb1	2.5826	chr7_100853106_100863286	4me3_up:13
Plekhb1	2.5826	chr7_100656956_100657476	4me3_up:1;27ac_up:1
Gstp1	2.55649	chr19_4470500_4476930	4me1_up:1;27ac_up:9
Gstp1	2.55649	chr19_4032200_4035410	4me3_up:5;27ac_up:7
Gstp1	2.55649	chr19_3323370_3342100	4me3_up:1
Gstp1	2.55649	chr19_4037390_4037580	4me3_up:3;27ac_up:3
Gstp1	2.55649	chr19_3852410_3864640	4me3_up:2
Gstp1	2.55649	chr19_4037620_4037860	4me3_up:4;27ac_up:4
Gstp1	2.55649	chr19_4037190_4037280	4me3_up:1;27ac_up:1
Gstp1	2.55649	chr19_4487140_4496780	4me3_up:3
Gstp1	2.55649	chr19_4036790_4037100	4me3_up:2;27ac_up:2
Gstp1	2.55649	chr19_3742220_3745480	4me3_up:7
Gstp1	2.55649	chr19_4035930_4036680	4me3_up:2;27ac_up:2
Gstp1	2.55649	chr19_4035660_4035820	4me3_up:1;27ac_up:1
Gstp1	2.55649	chr19_4070110_4072070	4me3_up:2
Gstp1	2.55649	chr19_4214630_4215730	27ac_up:5
Gstp1	2.55649	chr19_4217520_4220170	27ac_up:2
Gstp1	2.55649	chr19_4039830_4041900	27ac_up:2
Gstp1	2.55649	chr19_4041930_4042160	27ac_up:1
Ugt3a1	2.55485	chr15_9334685_9336575	4me3_up:2
Ugt3a1	2.55485	chr15_9118534_9119464	27ac_up:1
Npr2	2.54022	chr4_43348508_43351548	4me1_up:3
Npr2	2.54022	chr4_43406678_43412258	4me3_up:16
Npr2	2.54022	chr4_43507388_43508308	4me3_up:9
Npr2	2.54022	chr4_43519738_43522668	4me3_up:8;27ac_up:11
Npr2	2.54022	chr4_43611268_43614268	4me3_up:5
Npr2	2.54022	chr4_43508338_43510188	4me3_up:11
Npr2	2.54022	chr4_43453708_43454238	4me3_up:1
Npr2	2.54022	chr4_43730158_43730578	4me3_up:2
Npr2	2.54022	chr4_43040298_43046098	4me3_up:1
Npr2	2.54022	chr4_43425018_43425288	4me3_up:1;27ac_up:1
Npr2	2.54022	chr4_43453168_43453638	4me3_up:1
Npr2	2.54022	chr4_43454348_43454438	4me3_up:1
Npr2	2.54022	chr4_43416718_43419658	4me3_up:1;27ac_up:1
Npr2	2.54022	chr4_43452638_43453078	4me3_up:1
Npr2	2.54022	chr4_43423748_43423918	4me3_up:1;27ac_up:1
Npr2	2.54022	chr4_43422858_43423668	4me3_up:2;27ac_up:2
Npr2	2.54022	chr4_43875698_43880348	27ac_up:6
Npr2	2.54022	chr4_43632848_43633518	27ac_up:2
Npr2	2.54022	chr4_43619238_43621438	27ac_up:2
Mapk15	2.51897	chr15_75998260_75998370	27me3_down:1
Mapk15	2.51897	chr15_75999150_76001090	27me3_down:2
Mapk15	2.51897	chr15_75997700_75997820	27me3_down:1
Mapk15	2.51897	chr15_75995320_75995820	27me3_down:1;27ac_up:1
Mapk15	2.51897	chr15_75997930_75998050	27me3_down:1
Mapk15	2.51897	chr15_75997160_75997560	27me3_down:1
Mapk15	2.51897	chr15_75744050_75746840	27me3_down:2
Mapk15	2.51897	chr15_75995950_75996040	27me3_down:1
Mapk15	2.51897	chr15_75998670_75998770	27me3_down:1
Mapk15	2.51897	chr15_75996200_75996370	27me3_down:1
Mapk15	2.51897	chr15_75996510_75997110	27me3_down:1
Mapk15	2.51897	chr15_75998470_75998540	27me3_down:1
Mapk15	2.51897	chr15_76200600_76203500	4me3_up:3
Mapk15	2.51897	chr15_76199830_76200460	4me3_up:1
Mapk15	2.51897	chr15_76112770_76119100	4me3_up:9
Mapk15	2.51897	chr15_76306690_76307220	4me3_up:2;27ac_up:2
Mapk15	2.51897	chr15_75995100_75995230	4me3_up:2;27ac_up:2
Mapk15	2.51897	chr15_76305570_76305660	4me3_up:1;27ac_up:1
Mapk15	2.51897	chr15_76194810_76195420	4me3_up:2
Mapk15	2.51897	chr15_76194570_76194750	4me3_up:1
Mapk15	2.51897	chr15_76194000_76194340	4me3_up:1
Mapk15	2.51897	chr15_76193480_76193960	4me3_up:1
Mapk15	2.51897	chr15_76199400_76199540	4me3_up:1
Mapk15	2.51897	chr15_76120190_76120250	4me3_up:1
Mapk15	2.51897	chr15_76194430_76194550	4me3_up:1
Mapk15	2.51897	chr15_76267500_76268080	27ac_up:1
Mapk15	2.51897	chr15_76293540_76295890	27ac_up:1
Cidec	2.48368	chr6_113638636_113647636	4me3_up:3
Cidec	2.48368	chr6_113434506_113435706	4me3_up:3
Cidec	2.48368	chr6_113428306_113428386	4me3_up:1
Cidec	2.48368	chr6_113433206_113434426	4me3_up:3
Cidec	2.48368	chr6_113665846_113670196	4me3_up:7
Syt3	2.4577	chr7_44604750_44605800	27me3_down:1
Syt3	2.4577	chr7_44585120_44585210	27me3_down:1
Syt3	2.4577	chr7_44585810_44586550	27me3_down:1
Syt3	2.4577	chr7_44585360_44585710	27me3_down:1
Acpp	2.43769	chr9_104334050_104337540	4me3_up:3;27ac_up:3
Acpp	2.43769	chr9_104330790_104332250	27ac_up:3
Cyp2d9	2.43717	chr15_82640950_82641780	4me3_up:1
Cyp2d9	2.43717	chr15_82446670_82447040	27ac_up:1
Cyp2d9	2.43717	chr15_82557850_82559080	27ac_up:1
Fitm1	2.4129	chr14_55739523_55740723	4me1_up:1;27ac_up:1
Fitm1	2.4129	chr14_55152773_55154513	4me1_up:1;27ac_up:1
Fitm1	2.4129	chr14_55520883_55522083	27me3_down:2
Fitm1	2.4129	chr14_55782023_55784173	27me3_down:2
Fitm1	2.4129	chr14_54924603_54925433	27me3_down:1;27ac_up:1
Fitm1	2.4129	chr14_55781733_55781833	27me3_down:1
Fitm1	2.4129	chr14_55561433_55562883	4me3_up:12
Fitm1	2.4129	chr14_55560973_55561073	4me3_up:2
Fitm1	2.4129	chr14_55560113_55560913	4me3_up:10
Fitm1	2.4129	chr14_55480203_55484813	4me3_up:2
Fitm1	2.4129	chr14_55854423_55862943	4me3_up:3
Fitm1	2.4129	chr14_55479033_55479403	4me3_up:1
Fitm1	2.4129	chr14_55567393_55568223	27ac_up:1
Fitm1	2.4129	chr14_55567013_55567243	27ac_up:1
Fitm1	2.4129	chr14_55566773_55566863	27ac_up:1
Fitm1	2.4129	chr14_54875823_54877753	27ac_up:1
Fitm1	2.4129	chr14_55568643_55569013	27ac_up:1
Atp11a	2.36622	chr8_12770360_12782720	4me1_up:13
Atp11a	2.36622	chr8_12796130_12806640	4me1_up:9;27me3_down:9;27ac_up:9
Atp11a	2.36622	chr8_12806770_12811300	4me1_up:3;27me3_down:5
Atp11a	2.36622	chr8_12899390_12905890	27me3_down:6
Atp11a	2.36622	chr8_12868900_12878470	27me3_down:3
Atp11a	2.36622	chr8_12757350_12765420	27me3_down:18;27ac_up:18
Atp11a	2.36622	chr8_12386030_12395510	27me3_down:9
Atp11a	2.36622	chr8_12823050_12825670	27me3_down:6
Atp11a	2.36622	chr8_12399550_12410660	27me3_down:12
Atp11a	2.36622	chr8_12825740_12826320	27me3_down:3
Atp11a	2.36622	chr8_12476520_12489870	27me3_down:7
Atp11a	2.36622	chr8_12492310_12515060	27me3_down:15
Atp11a	2.36622	chr8_12897060_12898700	27me3_down:2
Atp11a	2.36622	chr8_12826400_12827440	27me3_down:3
Atp11a	2.36622	chr8_12827590_12828330	27me3_down:2
Atp11a	2.36622	chr8_12882000_12884610	27me3_down:2
Atp11a	2.36622	chr8_12879120_12881040	27me3_down:2
Atp11a	2.36622	chr8_12710030_12713380	4me3_up:3
Gstp2	2.34321	chr19_4032200_4035410	4me3_up:7;27ac_up:9
Gstp2	2.34321	chr19_4037390_4037580	4me3_up:4;27ac_up:4
Gstp2	2.34321	chr19_3852410_3864640	4me3_up:2
Gstp2	2.34321	chr19_4037620_4037860	4me3_up:4;27ac_up:4
Gstp2	2.34321	chr19_4037190_4037280	4me3_up:1;27ac_up:1
Gstp2	2.34321	chr19_4487140_4496780	4me3_up:1
Gstp2	2.34321	chr19_4036790_4037100	4me3_up:2;27ac_up:2
Gstp2	2.34321	chr19_3742220_3745480	4me3_up:2
Gstp2	2.34321	chr19_4035930_4036680	4me3_up:2;27ac_up:2
Gstp2	2.34321	chr19_3323370_3342100	4me3_up:1
Gstp2	2.34321	chr19_4035660_4035820	4me3_up:1;27ac_up:1
Gstp2	2.34321	chr19_4070110_4072070	4me3_up:2
Gstp2	2.34321	chr19_4214630_4215730	27ac_up:4
Gstp2	2.34321	chr19_4217520_4220170	27ac_up:2
Gstp2	2.34321	chr19_4039830_4041900	27ac_up:2
Gstp2	2.34321	chr19_4041930_4042160	27ac_up:1
Gstp2	2.34321	chr19_3389860_3391070	27ac_up:1
Gstp2	2.34321	chr19_4470500_4476930	27ac_up:1
9130409I23Rik	2.32524	chr1_181003749_181017419	4me3_up:7;27ac_up:13
9130409I23Rik	2.32524	chr1_181034989_181037259	4me3_up:2;27ac_up:2
9130409I23Rik	2.32524	chr1_181225889_181235439	4me3_up:1
9130409I23Rik	2.32524	chr1_181000169_181001789	27ac_up:1
9130409I23Rik	2.32524	chr1_180982969_180983559	27ac_up:1
9130409I23Rik	2.32524	chr1_180980979_180981709	27ac_up:1
9130409I23Rik	2.32524	chr1_181037319_181038679	27ac_up:1
Olig1	2.32456	chr16_91138665_91142305	4me1_up:3
Olig1	2.32456	chr16_91169525_91170745	27me3_down:3
Olig1	2.32456	chr16_91225645_91226335	27me3_down:2
Olig1	2.32456	chr16_91228675_91237195	27me3_down:7
Olig1	2.32456	chr16_91251985_91259765	27ac_up:7
Olig1	2.32456	chr16_91271935_91273495	27ac_up:2
Cyp26a1	2.28504	chr19_37698090_37698290	27ac_up:1
Cyp26a1	2.28504	chr19_37698510_37698780	27ac_up:2
Cyp26a1	2.28504	chr19_37699070_37699150	27ac_up:1
S1pr5	2.28346	chr9_21037836_21038636	27me3_down:3
S1pr5	2.28346	chr9_21035296_21035386	27me3_down:1
S1pr5	2.28346	chr9_21032326_21033086	27me3_down:2
S1pr5	2.28346	chr9_21035636_21036876	27me3_down:3
S1pr5	2.28346	chr9_21033356_21033486	27me3_down:2
S1pr5	2.28346	chr9_21033806_21034546	27me3_down:3
S1pr5	2.28346	chr9_21034826_21035036	27me3_down:1
S1pr5	2.28346	chr9_21037116_21037576	27me3_down:2
S1pr5	2.28346	chr9_21247356_21248386	4me3_up:3;27ac_up:3
S1pr5	2.28346	chr9_21311136_21312206	4me3_up:4
S1pr5	2.28346	chr9_21285366_21286576	4me3_up:5
S1pr5	2.28346	chr9_20986786_20992736	4me3_up:3
S1pr5	2.28346	chr9_21286676_21288756	4me3_up:5
S1pr5	2.28346	chr9_21245196_21246076	27ac_up:3
S1pr5	2.28346	chr9_20969736_20976596	27ac_up:6
S1pr5	2.28346	chr9_21246226_21246846	27ac_up:1
Lama3	2.26475	chr18_12562961_12564791	4me1_up:1;27ac_up:1
Lama3	2.26475	chr18_12644041_12650741	4me3_up:1
Lama3	2.26475	chr18_12223151_12236171	4me3_up:2
Nnmt	2.20651	chr9_48591095_48591875	4me1_up:1;27ac_up:1
Nnmt	2.20651	chr9_48592355_48603345	4me1_up:3;4me3_up:3;27ac_up:3
Nnmt	2.20651	chr9_48603555_48604795	4me1_up:4;4me3_up:4
Nnmt	2.20651	chr9_48665325_48743455	4me3_up:13;27ac_up:9
Nnmt	2.20651	chr9_48743555_48831735	4me3_up:4
Lcn2	2.20293	chr2_32340900_32353040	27me3_down:3
Lcn2	2.20293	chr2_32544610_32558020	4me3_up:6
Lcn2	2.20293	chr2_32161260_32182450	4me3_up:7
Lcn2	2.20293	chr2_32926900_32927980	27ac_up:1
Disp2	2.18089	chr2_118840344_118847724	4me1_up:2;4me3_up:2;27ac_up:4
Disp2	2.18089	chr2_118710254_118710724	27me3_down:1
Disp2	2.18089	chr2_118664864_118677244	27me3_down:8
Disp2	2.18089	chr2_118677824_118684734	27me3_down:8
Disp2	2.18089	chr2_118698014_118699094	27me3_down:7
Disp2	2.18089	chr2_118677294_118677714	27me3_down:3
Disp2	2.18089	chr2_118710994_118711084	27me3_down:1
Disp2	2.18089	chr2_118709624_118710194	27me3_down:1
Disp2	2.18089	chr2_118710814_118710914	27me3_down:1
Disp2	2.18089	chr2_118725094_118729234	4me3_up:7
Disp2	2.18089	chr2_118779944_118785194	4me3_up:1
Disp2	2.18089	chr2_119238234_119245154	27ac_up:1
Olfm3	2.15712	chr3_115081182_115090072	4me3_up:2;27ac_up:2
Olfm3	2.15712	chr3_115079932_115080962	4me3_up:2;27ac_up:2
Slc22a30	2.15525	chr19_9045710_9054450	4me3_up:1;27ac_up:1
Slc22a30	2.15525	chr19_8516840_8520040	4me3_up:2
Slc3a1	2.15221	chr17_84936370_84936690	4me3_up:1
Treh	2.14762	chr9_44673337_44676117	4me1_up:4;27ac_up:4
Treh	2.14762	chr9_44728097_44735117	27me3_down:2
Treh	2.14762	chr9_44514297_44519637	4me3_up:6
Treh	2.14762	chr9_44654807_44656157	4me3_up:1
Treh	2.14762	chr9_44536417_44541377	4me3_up:1
Mfsd2a	2.13991	chr4_123048877_123049147	4me1_up:1
Mfsd2a	2.13991	chr4_122977097_122981247	4me1_up:2;27ac_up:2
Mfsd2a	2.13991	chr4_123047017_123048767	4me1_up:2
Mfsd2a	2.13991	chr4_122982817_122984687	4me1_up:4;27ac_up:4
Mfsd2a	2.13991	chr4_122974387_122975687	4me1_up:1;27ac_up:1
Mfsd2a	2.13991	chr4_123049257_123049467	4me1_up:1
Mfsd2a	2.13991	chr4_122956847_122959267	4me3_up:7
Mfsd2a	2.13991	chr4_122959397_122960937	4me3_up:7
Mfsd2a	2.13991	chr4_122952127_122956727	4me3_up:36
Mfsd2a	2.13991	chr4_122931577_122937137	4me3_up:11
Aatk	2.10895	chr11_120041776_120046576	4me3_up:1
Aatk	2.10895	chr11_120032216_120041726	4me3_up:1
Aatk	2.10895	chr11_120263106_120268306	27ac_up:3
Aatk	2.10895	chr11_120215086_120222946	27ac_up:13
Aatk	2.10895	chr11_120282226_120283086	27ac_up:2
Aatk	2.10895	chr11_120279246_120279366	27ac_up:1
Aatk	2.10895	chr11_120284166_120284246	27ac_up:1
Aatk	2.10895	chr11_120276866_120279046	27ac_up:2
Aatk	2.10895	chr11_120283386_120283986	27ac_up:1
Aatk	2.10895	chr11_120279506_120280066	27ac_up:2
Cyp2u1	2.10658	chr3_131301172_131302672	4me1_up:4;4me3_up:12;27ac_up:12
Cyp2u1	2.10658	chr3_131516276_131517326	4me1_up:1;27ac_up:1
Cyp2u1	2.10658	chr3_131112812_131113852	27me3_down:7
Cyp2u1	2.10658	chr3_131111672_131112782	27me3_down:5
Cyp2u1	2.10658	chr3_131115542_131130642	27me3_down:2
Cyp2u1	2.10658	chr3_131503236_131509966	27ac_up:1
Cyp2u1	2.10658	chr3_131469136_131475316	27ac_up:5
Cyp2u1	2.10658	chr3_131475866_131476966	27ac_up:2
Zap70	2.09198	chr1_36998255_37005735	4me3_up:6
Zap70	2.09198	chr1_36764665_36766925	4me3_up:2
Zap70	2.09198	chr1_36761935_36764505	4me3_up:1
Mme	2.08377	chr3_63416618_63418988	4me1_up:3
Mme	2.08377	chr3_63393828_63395428	4me1_up:1
Mme	2.08377	chr3_63411208_63414908	4me1_up:2
Mme	2.08377	chr3_63295948_63296088	27ac_up:1
Mme	2.08377	chr3_63296318_63297468	27ac_up:5
Kctd15	2.01841	chr7_34644981_34648861	4me1_up:6;27ac_up:6
Kctd15	2.01841	chr7_34625831_34632191	4me3_up:25
Cabyr	2.00613	chr18_12681421_12684831	4me1_up:4
Cabyr	2.00613	chr18_12684881_12686951	4me1_up:1;27ac_up:1
Cabyr	2.00613	chr18_12713851_12714921	4me1_up:1
Cabyr	2.00613	chr18_12562961_12564791	4me1_up:1;27ac_up:1
Cabyr	2.00613	chr18_12699871_12700731	4me1_up:1
Cabyr	2.00613	chr18_12709331_12711711	4me1_up:1;27ac_up:1
Cabyr	2.00613	chr18_12666671_12679361	4me1_up:1;27ac_up:3
Cabyr	2.00613	chr18_12697461_12697881	4me1_up:1
Cabyr	2.00613	chr18_12698051_12698731	4me1_up:1
Cabyr	2.00613	chr18_12715151_12717351	4me1_up:1
Cabyr	2.00613	chr18_12644041_12650741	4me3_up:13
Cabyr	2.00613	chr18_12863371_12871071	4me3_up:1
Cabyr	2.00613	chr18_12972371_12974711	4me3_up:5
Cabyr	2.00613	chr18_12524831_12525001	27ac_up:1
Cabyr	2.00613	chr18_12523331_12524501	27ac_up:1
Cabyr	2.00613	chr18_12524611_12524721	27ac_up:1
Cabyr	2.00613	chr18_12525171_12525781	27ac_up:1
Cabyr	2.00613	chr18_12828581_12829801	27ac_up:1
Mcm10	1.98924	chr2_4919144_4922824	4me1_up:28
Mcm10	1.98924	chr2_4935174_4937114	4me1_up:1;27ac_up:1
Mcm10	1.98924	chr2_5035074_5036664	4me1_up:2
Mcm10	1.98924	chr2_4928954_4929964	4me1_up:2
Mcm10	1.98924	chr2_4934144_4935104	4me1_up:1;27ac_up:1
Mcm10	1.98924	chr2_4922884_4924154	4me1_up:5
Mcm10	1.98924	chr2_4937154_4938044	4me1_up:1;27ac_up:1
Mcm10	1.98924	chr2_5034294_5034964	4me1_up:2
Mcm10	1.98924	chr2_5138304_5141224	27me3_down:3
Mcm10	1.98924	chr2_4994114_4994564	4me3_up:1;27ac_up:1
Mcm10	1.98924	chr2_4996164_4997094	4me3_up:1;27ac_up:1
Mcm10	1.98924	chr2_4994674_4995354	4me3_up:1;27ac_up:1
Zfp809	1.97247	chr9_22195466_22197066	4me1_up:1;27ac_up:1
Zfp809	1.97247	chr9_22382326_22389716	4me1_up:13
Zfp809	1.97247	chr9_22209786_22213716	4me1_up:1;4me3_up:10;27ac_up:10
Zfp809	1.97247	chr9_22304416_22305506	4me1_up:2;27ac_up:2
Zfp809	1.97247	chr9_22197186_22197366	4me1_up:1;27ac_up:1
Zfp809	1.97247	chr9_22231256_22232206	4me1_up:1;27ac_up:1
Zfp809	1.97247	chr9_22043706_22051586	27me3_down:14
Zfp809	1.97247	chr9_21927736_21928906	4me3_up:3
Zfp809	1.97247	chr9_22130596_22131736	4me3_up:10
Zfp809	1.97247	chr9_21926146_21926246	4me3_up:1
Zfp809	1.97247	chr9_22149266_22150496	4me3_up:1;27ac_up:1
Zfp809	1.97247	chr9_21926356_21927176	4me3_up:3
Zfp809	1.97247	chr9_22128256_22129526	4me3_up:5
Zfp809	1.97247	chr9_21988266_21988846	4me3_up:1
Zfp809	1.97247	chr9_22364096_22368376	4me3_up:4
Zfp809	1.97247	chr9_21990476_21990796	4me3_up:1
Zfp809	1.97247	chr9_21923266_21925986	4me3_up:6
Zfp809	1.97247	chr9_22130126_22130516	4me3_up:4
Zfp809	1.97247	chr9_22188006_22189556	4me3_up:4;27ac_up:4
Zfp809	1.97247	chr9_21988956_21989356	4me3_up:1
Zfp809	1.97247	chr9_22129656_22129856	4me3_up:1
Zfp809	1.97247	chr9_21990956_21991606	4me3_up:1
Zfp809	1.97247	chr9_21987706_21987846	4me3_up:1
Zfp809	1.97247	chr9_21990236_21990396	4me3_up:1
Zfp809	1.97247	chr9_21987896_21988036	4me3_up:1
Zfp809	1.97247	chr9_22057396_22057496	27ac_up:1
Zfp809	1.97247	chr9_22056526_22057286	27ac_up:1
Zfp809	1.97247	chr9_22056086_22056406	27ac_up:1
Zfp809	1.97247	chr9_22055886_22055986	27ac_up:1
Zfp809	1.97247	chr9_21749916_21755466	27ac_up:1
Keg1	1.96655	chr19_12798670_12803930	4me1_up:3;4me3_up:3
Keg1	1.96655	chr19_12660980_12661760	4me1_up:1;27ac_up:1
Keg1	1.96655	chr19_12465920_12466330	4me1_up:1;4me3_up:1;27ac_up:1
Acot11	1.94929	chr4_106776195_106799675	4me1_up:6;4me3_up:10
Acot11	1.94929	chr4_106767315_106768595	4me1_up:1
Acot11	1.94929	chr4_107009765_107027215	4me3_up:7
Acot11	1.94929	chr4_106529225_106530285	4me3_up:1
Acot11	1.94929	chr4_106844545_106871835	27ac_up:17
Acot11	1.94929	chr4_106586515_106586605	27ac_up:1
Acot11	1.94929	chr4_106915725_106987275	27ac_up:17
Acot11	1.94929	chr4_106990745_107009675	27ac_up:4
Acot11	1.94929	chr4_106585985_106586335	27ac_up:1
Acot11	1.94929	chr4_106589105_106591425	27ac_up:6
Acot11	1.94929	chr4_106828135_106832155	27ac_up:2
Saa3	1.9339	chr7_46741390_46742430	27ac_up:1
Aldh1a1	1.92428	chr19_20511530_20517630	4me1_up:3;27ac_up:3
Aldh1a1	1.92428	chr19_20552330_20553090	4me1_up:1;27ac_up:1
Aldh1a1	1.92428	chr19_20551270_20552180	4me1_up:1;27ac_up:1
Aldh1a1	1.92428	chr19_20727060_20727440	4me3_up:2;27ac_up:2
Aldh1a1	1.92428	chr19_20648380_20657310	27ac_up:4
Aldh1a1	1.92428	chr19_20632750_20634340	27ac_up:3
Aldh1a1	1.92428	chr19_20634510_20636040	27ac_up:2
Aldh1a1	1.92428	chr19_21029050_21034930	27ac_up:1
Aldh1a1	1.92428	chr19_20722410_20726950	27ac_up:1
Unc13b	1.91578	chr4_43348508_43351548	4me1_up:1
Unc13b	1.91578	chr4_43040298_43046098	4me3_up:42
Unc13b	1.91578	chr4_43406678_43412258	4me3_up:2
Unc13b	1.91578	chr4_43425018_43425288	4me3_up:1;27ac_up:1
Unc13b	1.91578	chr4_43423748_43423918	4me3_up:1;27ac_up:1
Unc13b	1.91578	chr4_43422858_43423668	4me3_up:1;27ac_up:1
Lag3	1.91216	chr6_124996932_124998432	27me3_down:3
Lag3	1.91216	chr6_124862122_124863662	27me3_down:10
Lag3	1.91216	chr6_124854442_124854842	27me3_down:2
Lag3	1.91216	chr6_124855272_124855942	27me3_down:5
Lag3	1.91216	chr6_124998482_124998602	27me3_down:1
Lag3	1.91216	chr6_124999732_125000652	27me3_down:2
Lag3	1.91216	chr6_124998972_124999232	27me3_down:1
Lag3	1.91216	chr6_124998672_124998912	27me3_down:1
Lag3	1.91216	chr6_124860212_124860332	27me3_down:1
Lag3	1.91216	chr6_124859212_124859482	27me3_down:1
Lag3	1.91216	chr6_124854972_124855072	27me3_down:1
Lag3	1.91216	chr6_124879692_124888072	4me3_up:4
Lag3	1.91216	chr6_125350062_125356822	4me3_up:1
Lag3	1.91216	chr6_125363712_125364582	4me3_up:1;27ac_up:1
Lag3	1.91216	chr6_125364732_125370372	27ac_up:1
Aox1	1.89414	chr1_57775016_57776386	4me1_up:5
Aox1	1.89414	chr1_58069716_58071856	4me1_up:1;27ac_up:1
Aox1	1.89414	chr1_58113306_58114866	4me3_up:5;27ac_up:5
Aox1	1.89414	chr1_58030056_58030996	4me3_up:8;27ac_up:8
Aox1	1.89414	chr1_58114926_58115056	4me3_up:1;27ac_up:1
Aox1	1.89414	chr1_58097976_58102576	27ac_up:6
Aox1	1.89414	chr1_58076526_58078006	27ac_up:1
Aox1	1.89414	chr1_58145836_58146256	27ac_up:1
Aox1	1.89414	chr1_58102646_58103406	27ac_up:1
Lrg1	1.88832	chr17_56133847_56134067	4me3_up:1
Lrg1	1.88832	chr17_56109597_56109687	4me3_up:1
Lrg1	1.88832	chr17_56132377_56132497	4me3_up:1
Lrg1	1.88832	chr17_56109447_56109537	4me3_up:1
Lrg1	1.88832	chr17_56107367_56108587	4me3_up:3
Lrg1	1.88832	chr17_56108637_56109307	4me3_up:2
Lrg1	1.88832	chr17_56132617_56132707	4me3_up:1
Lrg1	1.88832	chr17_56132867_56133607	4me3_up:2
Ldhd	1.88285	chr8_111629010_111629730	4me3_up:3;27ac_up:3
Ldhd	1.88285	chr8_111630840_111631080	4me3_up:1;27ac_up:1
Ldhd	1.88285	chr8_111628720_111628980	4me3_up:1;27ac_up:1
Ldhd	1.88285	chr8_111619310_111621590	27ac_up:9
Ldhd	1.88285	chr8_111577090_111601530	27ac_up:4
Ldhd	1.88285	chr8_111627570_111628090	27ac_up:1
Ldhd	1.88285	chr8_111616510_111619200	27ac_up:5
Ldhd	1.88285	chr8_111779400_111788490	27ac_up:5
Ldhd	1.88285	chr8_111778590_111779250	27ac_up:1
Ldhd	1.88285	chr8_111627190_111627270	27ac_up:1
Ldhd	1.88285	chr8_111626030_111626210	27ac_up:1
Ldhd	1.88285	chr8_111975460_111978020	27ac_up:1
Ldhd	1.88285	chr8_111627380_111627480	27ac_up:1
Proca1	1.88217	chr11_78489898_78490558	27me3_down:1
Proca1	1.88217	chr11_78491178_78492508	27me3_down:1
Proca1	1.88217	chr11_78193758_78198388	4me3_up:18
Proca1	1.88217	chr11_78204188_78204838	27ac_up:1
Proca1	1.88217	chr11_78200518_78201808	27ac_up:1
Proca1	1.88217	chr11_78201888_78204058	27ac_up:2
Dntt	1.87081	chr19_40991760_40992620	4me3_up:3
Dntt	1.87081	chr19_41045650_41046510	4me3_up:2;27ac_up:2
Dntt	1.87081	chr19_41042980_41044160	27ac_up:1
Dntt	1.87081	chr19_41042490_41042860	27ac_up:1
Apol9a	1.85334	chr15_77405700_77411980	4me1_up:6;4me3_up:4;27ac_up:4
Apol9a	1.85334	chr15_77396500_77398930	4me3_up:4
Apol9a	1.85334	chr15_76950730_76954850	4me3_up:1
Apol9a	1.85334	chr15_77365820_77366830	4me3_up:1;27ac_up:1
Apol9a	1.85334	chr15_77376350_77377730	4me3_up:2
Apol9a	1.85334	chr15_77330020_77333720	4me3_up:1
Apol9a	1.85334	chr15_77362370_77365480	27ac_up:1
Cdc42ep5	1.85174	chr7_4162448_4164818	4me3_up:5;27ac_up:5
Cdc42ep5	1.85174	chr7_4076818_4093278	4me3_up:1
Cdc42ep5	1.85174	chr7_4470888_4471218	4me3_up:1
Cdc42ep5	1.85174	chr7_4471488_4471788	4me3_up:1
2010003K11Rik	1.84855	chr19_4470500_4476930	4me1_up:1;27ac_up:10
2010003K11Rik	1.84855	chr19_3742220_3745480	4me3_up:1
2010003K11Rik	1.84855	chr19_4037390_4037580	4me3_up:1;27ac_up:1
2010003K11Rik	1.84855	chr19_4037190_4037280	4me3_up:1;27ac_up:1
2010003K11Rik	1.84855	chr19_4838900_4839190	4me3_up:2
2010003K11Rik	1.84855	chr19_4032200_4035410	4me3_up:1;27ac_up:1
2010003K11Rik	1.84855	chr19_4037620_4037860	4me3_up:1;27ac_up:1
2010003K11Rik	1.84855	chr19_4487140_4496780	4me3_up:5
2010003K11Rik	1.84855	chr19_4035660_4035820	4me3_up:1;27ac_up:1
2010003K11Rik	1.84855	chr19_4035930_4036680	4me3_up:1;27ac_up:1
2010003K11Rik	1.84855	chr19_4036790_4037100	4me3_up:1;27ac_up:1
2010003K11Rik	1.84855	chr19_4039830_4041900	27ac_up:1
2010003K11Rik	1.84855	chr19_4214630_4215730	27ac_up:1
2010003K11Rik	1.84855	chr19_4041930_4042160	27ac_up:1
2010003K11Rik	1.84855	chr19_4794000_4801280	27ac_up:1
Orm3	1.8466	chr4_63345206_63345416	4me1_up:1;4me3_up:1;27ac_up:1
Orm3	1.8466	chr4_63345486_63346036	4me1_up:2;4me3_up:2;27ac_up:2
Orm3	1.8466	chr4_63341166_63343496	4me1_up:1;4me3_up:1;27ac_up:1
Orm3	1.8466	chr4_63710116_63724596	27me3_down:2
Orm3	1.8466	chr4_63344706_63345066	4me3_up:3;27ac_up:3
Orm3	1.8466	chr4_63356306_63356566	4me3_up:1;27ac_up:1
Orm3	1.8466	chr4_63356706_63356906	4me3_up:1;27ac_up:1
Orm3	1.8466	chr4_63150436_63151446	4me3_up:1
Orm3	1.8466	chr4_63151526_63152576	4me3_up:1
Orm3	1.8466	chr4_63359386_63360696	27ac_up:1
Orm3	1.8466	chr4_63356976_63357536	27ac_up:1
Orm3	1.8466	chr4_63361586_63362966	27ac_up:3
Orm3	1.8466	chr4_63365876_63367116	27ac_up:1
Orm3	1.8466	chr4_63338856_63339876	27ac_up:1
Orm3	1.8466	chr4_63357646_63357786	27ac_up:1
Slc2a5	1.83856	chr4_150026661_150034871	27me3_down:1
Slc2a5	1.83856	chr4_149808071_149815001	27me3_down:4
Slc2a5	1.83856	chr4_150047081_150058451	4me3_up:14;27ac_up:14
Slc2a5	1.83856	chr4_150003231_150007711	4me3_up:3
Slc2a5	1.83856	chr4_149851861_149859931	4me3_up:4
Slc2a5	1.83856	chr4_149996381_150003031	4me3_up:8
Slc2a5	1.83856	chr4_150128331_150129991	4me3_up:3;27ac_up:3
Slc2a5	1.83856	chr4_150130191_150135491	4me3_up:1;27ac_up:9
Slc2a5	1.83856	chr4_150324241_150327091	27ac_up:1
Slc2a5	1.83856	chr4_150137821_150139411	27ac_up:8
Slc2a5	1.83856	chr4_149796111_149801401	27ac_up:1
Aox3	1.82647	chr1_57775016_57776386	4me1_up:1
Aox3	1.82647	chr1_58069716_58071856	4me1_up:1;27ac_up:1
Aox3	1.82647	chr1_58113306_58114866	4me3_up:2;27ac_up:2
Aox3	1.82647	chr1_58030056_58030996	4me3_up:6;27ac_up:6
Aox3	1.82647	chr1_58076526_58078006	27ac_up:1
Aox3	1.82647	chr1_58102646_58103406	27ac_up:1
Aox3	1.82647	chr1_58097976_58102576	27ac_up:5
Aox3	1.82647	chr1_58145836_58146256	27ac_up:1
Slc16a13	1.81759	chr11_70305538_70307968	4me1_up:6
Slc16a13	1.81759	chr11_69966148_69966938	27me3_down:3
Slc16a13	1.81759	chr11_69967298_69967548	27me3_down:1
Slc16a13	1.81759	chr11_69964918_69965418	27me3_down:1
Slc16a13	1.81759	chr11_69941128_69941218	27me3_down:1
Slc16a13	1.81759	chr11_69940158_69940318	27me3_down:1
Slc16a13	1.81759	chr11_69940428_69940588	27me3_down:1
Slc16a13	1.81759	chr11_69936958_69938338	27me3_down:2
Slc16a13	1.81759	chr11_69938368_69939228	27me3_down:1
Slc16a13	1.81759	chr11_69939318_69939868	27me3_down:1
Slc16a13	1.81759	chr11_69936248_69936888	27me3_down:1
Slc16a13	1.81759	chr11_69940758_69941038	27me3_down:1
Slc16a13	1.81759	chr11_69967098_69967218	27me3_down:1
Slc16a13	1.81759	chr11_69877378_69877538	4me3_up:1
Slc16a13	1.81759	chr11_70219328_70220188	4me3_up:12
Slc16a13	1.81759	chr11_70026988_70030398	4me3_up:6
Slc16a13	1.81759	chr11_69876708_69876778	4me3_up:1
Slc16a13	1.81759	chr11_69874218_69876678	4me3_up:2
Slc16a13	1.81759	chr11_70253328_70254408	4me3_up:3
Slc16a13	1.81759	chr11_69877198_69877298	4me3_up:1
Slc16a13	1.81759	chr11_70220338_70220478	4me3_up:1
Slc16a13	1.81759	chr11_69890978_69892248	4me3_up:1
Car3	1.81145	chr3_14754280_14759080	27ac_up:4
Car3	1.81145	chr3_14777920_14778340	27ac_up:1
Car3	1.81145	chr3_14868440_14869230	27ac_up:1
Car3	1.81145	chr3_14828860_14829360	27ac_up:1
Car3	1.81145	chr3_14870900_14871540	27ac_up:1
Car3	1.81145	chr3_14829820_14833650	27ac_up:4
Car3	1.81145	chr3_14869350_14870040	27ac_up:1
Car3	1.81145	chr3_14864440_14866800	27ac_up:1
Gsta2	1.81126	chr9_78211223_78214913	4me1_up:2
Gsta2	1.81126	chr9_78520253_78522083	4me3_up:3
Gsta2	1.81126	chr9_78512293_78517183	4me3_up:1;27ac_up:1
Blnk	1.80763	chr19_41205130_41206470	27me3_down:4
Blnk	1.80763	chr19_40991760_40992620	4me3_up:3
Blnk	1.80763	chr19_41045650_41046510	4me3_up:2;27ac_up:2
Blnk	1.80763	chr19_41048010_41048770	4me3_up:1;27ac_up:1
Blnk	1.80763	chr19_41042490_41042860	27ac_up:1
Blnk	1.80763	chr19_41329550_41332200	27ac_up:1
Blnk	1.80763	chr19_41042980_41044160	27ac_up:1
Cxcl1	1.7798	chr5_90853214_90862444	4me1_up:1
Cxcl1	1.7798	chr5_91139874_91140894	27me3_down:3
Cxcl1	1.7798	chr5_90891784_90892504	4me3_up:4;27ac_up:4
Cxcl1	1.7798	chr5_90891374_90891464	4me3_up:1;27ac_up:1
Cxcl1	1.7798	chr5_90893114_90893894	4me3_up:1;27ac_up:1
Cxcl1	1.7798	chr5_90891584_90891704	4me3_up:1;27ac_up:1
Cxcl1	1.7798	chr5_90875744_90881244	27ac_up:4
Cxcl1	1.7798	chr5_90899334_90900844	27ac_up:1
Ugdh	1.77943	chr5_65484821_65492731	4me3_up:17
Ugdh	1.77943	chr5_65722551_65727261	4me3_up:3
Ugdh	1.77943	chr5_65198881_65202201	4me3_up:14
Ugdh	1.77943	chr5_64871411_64883161	4me3_up:1
Ugdh	1.77943	chr5_65041931_65048981	4me3_up:1;27ac_up:1
Ugdh	1.77943	chr5_65157391_65158751	4me3_up:1
Ugdh	1.77943	chr5_65427581_65435621	27ac_up:1
Ugdh	1.77943	chr5_66102891_66115821	27ac_up:1
Ugdh	1.77943	chr5_65083511_65099361	27ac_up:1
Derl3	1.77147	chr10_75871075_75881865	4me3_up:27
Derl3	1.77147	chr10_75832805_75833645	4me3_up:9
Derl3	1.77147	chr10_75832565_75832655	4me3_up:1
Derl3	1.77147	chr10_75833735_75834165	4me3_up:3
Derl3	1.77147	chr10_75788455_75791255	4me3_up:3
Chpt1	1.75209	chr10_88506665_88507915	4me1_up:1;27ac_up:1
Chpt1	1.75209	chr10_88514615_88514845	27ac_up:1
Csad	1.75203	chr15_102093199_102093649	4me1_up:1;27ac_up:1
Csad	1.75203	chr15_102090089_102091389	4me1_up:2;27ac_up:2
Csad	1.75203	chr15_102086639_102088609	4me1_up:1
Csad	1.75203	chr15_102089029_102089859	4me1_up:1;27ac_up:1
Csad	1.75203	chr15_102091489_102092979	4me1_up:2;27ac_up:2
Csad	1.75203	chr15_102921909_102923019	27me3_down:1
Csad	1.75203	chr15_102103159_102104529	4me3_up:6
Csad	1.75203	chr15_102014339_102018209	4me3_up:2;27ac_up:2
Csad	1.75203	chr15_102104629_102105329	4me3_up:10
Csad	1.75203	chr15_102107919_102108009	4me3_up:1
Csad	1.75203	chr15_102460719_102462169	4me3_up:4
Csad	1.75203	chr15_102001619_102003889	4me3_up:14
Csad	1.75203	chr15_102187669_102187999	4me3_up:1;27ac_up:1
Csad	1.75203	chr15_102106279_102106589	4me3_up:2
Csad	1.75203	chr15_102028669_102029459	4me3_up:9
Csad	1.75203	chr15_102106829_102107009	4me3_up:2
Csad	1.75203	chr15_102107179_102107479	4me3_up:3
Csad	1.75203	chr15_102459579_102460099	4me3_up:1
Csad	1.75203	chr15_102281739_102286079	4me3_up:5
Csad	1.75203	chr15_102188299_102188539	4me3_up:1;27ac_up:1
Csad	1.75203	chr15_102105369_102106239	4me3_up:1
Csad	1.75203	chr15_102107529_102107799	4me3_up:1
Csad	1.75203	chr15_101983389_101985209	4me3_up:2
Csad	1.75203	chr15_102029539_102029819	4me3_up:1
Csad	1.75203	chr15_102459249_102459459	4me3_up:1
Csad	1.75203	chr15_102188679_102188879	4me3_up:1;27ac_up:1
Csad	1.75203	chr15_102187169_102187559	4me3_up:1;27ac_up:1
Csad	1.75203	chr15_102106629_102106779	4me3_up:1
Csad	1.75203	chr15_102460139_102460369	4me3_up:1
Csad	1.75203	chr15_102188089_102188179	4me3_up:1;27ac_up:1
Csad	1.75203	chr15_102023719_102026199	4me3_up:1
Csad	1.75203	chr15_102191269_102193519	27ac_up:1
Extl1	1.74293	chr4_134252255_134254025	27me3_down:7
Extl1	1.74293	chr4_134014745_134018045	27me3_down:1
Extl1	1.74293	chr4_134344215_134345895	27me3_down:3
Extl1	1.74293	chr4_134343335_134344005	27me3_down:2
Extl1	1.74293	chr4_134018245_134018705	27me3_down:1
Extl1	1.74293	chr4_134548075_134549485	4me3_up:5
Extl1	1.74293	chr4_134497245_134499935	4me3_up:11
Extl1	1.74293	chr4_134362715_134363075	4me3_up:2
Extl1	1.74293	chr4_134236315_134238255	4me3_up:10
Extl1	1.74293	chr4_134238285_134239575	4me3_up:1
Extl1	1.74293	chr4_134545685_134547945	4me3_up:4
Extl1	1.74293	chr4_134156365_134161255	4me3_up:1
Rarres1	1.68877	chr3_67549328_67560028	4me1_up:2;4me3_up:1
Rarres1	1.68877	chr3_67514158_67515158	27ac_up:4
Ggt6	1.68461	chr11_72279888_72291628	4me1_up:1;27ac_up:1
Ggt6	1.68461	chr11_72435758_72436438	4me3_up:2;27ac_up:2
Ggt6	1.68461	chr11_72436638_72436718	4me3_up:1;27ac_up:1
Ggt6	1.68461	chr11_72436828_72437138	4me3_up:1;27ac_up:1
Ggt6	1.68461	chr11_72440678_72442738	27ac_up:13
B4galnt3	1.68237	chr6_120183622_120196072	4me3_up:9
B4galnt3	1.68237	chr6_120247602_120267582	4me3_up:2;27ac_up:2
B4galnt3	1.68237	chr6_120232982_120245582	27ac_up:4
Cntnap1	1.67589	chr11_101265166_101265246	27me3_down:1
Cntnap1	1.67589	chr11_101263986_101264266	27me3_down:2
Cntnap1	1.67589	chr11_101262886_101263766	27me3_down:2
Cntnap1	1.67589	chr11_101264416_101265076	27me3_down:2
Cntnap1	1.67589	chr11_101265456_101267126	27me3_down:1
Cntnap1	1.67589	chr11_100757796_100759526	27me3_down:1
Cntnap1	1.67589	chr11_101142606_101144736	4me3_up:11
Cntnap1	1.67589	chr11_101476286_101482136	4me3_up:1
Cntnap1	1.67589	chr11_101181376_101181636	4me3_up:1;27ac_up:1
Cntnap1	1.67589	chr11_100703266_100703486	4me3_up:1
Cntnap1	1.67589	chr11_101181806_101182196	4me3_up:1;27ac_up:1
Cntnap1	1.67589	chr11_101182306_101182426	4me3_up:1;27ac_up:1
Cntnap1	1.67589	chr11_101351036_101352486	4me3_up:1
Cntnap1	1.67589	chr11_100701676_100702196	4me3_up:1
Cntnap1	1.67589	chr11_100601816_100619526	4me3_up:1
Cntnap1	1.67589	chr11_101584506_101585496	4me3_up:1
Cntnap1	1.67589	chr11_101161786_101162676	27ac_up:5
Cntnap1	1.67589	chr11_101165186_101165476	27ac_up:2
Cntnap1	1.67589	chr11_101164786_101165046	27ac_up:2
Cntnap1	1.67589	chr11_101164466_101164656	27ac_up:2
Cntnap1	1.67589	chr11_101286946_101287786	27ac_up:3
Cntnap1	1.67589	chr11_101182546_101182876	27ac_up:1
Cntnap1	1.67589	chr11_101163696_101164006	27ac_up:2
Cntnap1	1.67589	chr11_101163056_101163496	27ac_up:1
Oat	1.67355	chr7_132353407_132377337	27me3_down:7
Oat	1.67355	chr7_132771627_132779127	4me3_up:4
Oat	1.67355	chr7_132666297_132668847	27ac_up:1
Spsb4	1.67142	chr9_96976401_96992061	4me1_up:16;27ac_up:16
Spsb4	1.67142	chr9_96946951_96959551	4me1_up:4;27ac_up:4
Spsb4	1.67142	chr9_96961881_96963801	4me1_up:1
Spsb4	1.67142	chr9_97009641_97018191	27me3_down:25
Spsb4	1.67142	chr9_97100231_97111541	27me3_down:21
Spsb4	1.67142	chr9_97132851_97133941	27me3_down:1
Spsb4	1.67142	chr9_97137141_97142801	27me3_down:4
Spsb4	1.67142	chr9_97121041_97127981	27me3_down:1
Spsb4	1.67142	chr9_96751381_96753311	4me3_up:7
Spsb4	1.67142	chr9_96968511_96975041	27ac_up:1
Ugt2b1	1.65821	chr5_87339595_87340845	4me1_up:1;4me3_up:1;27ac_up:1
Ugt2b1	1.65821	chr5_87336415_87337275	4me1_up:1;27ac_up:1
2200002D01Rik	1.64992	chr7_29414841_29434741	4me1_up:5
2200002D01Rik	1.64992	chr7_29304111_29309401	27me3_down:15
2200002D01Rik	1.64992	chr7_29247961_29248121	4me3_up:1;27ac_up:1
2200002D01Rik	1.64992	chr7_29210921_29213911	4me3_up:31
2200002D01Rik	1.64992	chr7_29339171_29345171	4me3_up:5;27ac_up:7
2200002D01Rik	1.64992	chr7_28826271_28829791	4me3_up:4
2200002D01Rik	1.64992	chr7_28825411_28825871	4me3_up:1
2200002D01Rik	1.64992	chr7_29337831_29338951	4me3_up:2;27ac_up:2
2200002D01Rik	1.64992	chr7_29210531_29210641	4me3_up:2
2200002D01Rik	1.64992	chr7_29248231_29248351	4me3_up:1;27ac_up:1
2200002D01Rik	1.64992	chr7_29333871_29336361	4me3_up:1;27ac_up:1
2200002D01Rik	1.64992	chr7_28826071_28826181	4me3_up:1
2200002D01Rik	1.64992	chr7_29263761_29281511	27ac_up:25
2200002D01Rik	1.64992	chr7_29154531_29154611	27ac_up:1
2200002D01Rik	1.64992	chr7_29155351_29155671	27ac_up:9
2200002D01Rik	1.64992	chr7_29156021_29156121	27ac_up:1
2200002D01Rik	1.64992	chr7_29155801_29155881	27ac_up:1
2200002D01Rik	1.64992	chr7_29154691_29155151	27ac_up:1
Col27a1	1.64929	chr4_63345486_63346036	4me1_up:1;4me3_up:1;27ac_up:1
Col27a1	1.64929	chr4_63345206_63345416	4me1_up:1;4me3_up:1;27ac_up:1
Col27a1	1.64929	chr4_63344706_63345066	4me3_up:2;27ac_up:2
Col27a1	1.64929	chr4_63356306_63356566	4me3_up:1;27ac_up:1
Col27a1	1.64929	chr4_63356706_63356906	4me3_up:1;27ac_up:1
Col27a1	1.64929	chr4_63150436_63151446	4me3_up:1
Col27a1	1.64929	chr4_63151526_63152576	4me3_up:1
Col27a1	1.64929	chr4_63359386_63360696	27ac_up:1
Col27a1	1.64929	chr4_63356976_63357536	27ac_up:1
Col27a1	1.64929	chr4_63361586_63362966	27ac_up:1
Col27a1	1.64929	chr4_63365876_63367116	27ac_up:1
Col27a1	1.64929	chr4_63357646_63357786	27ac_up:1
G0s2	1.63445	chr1_192851746_192854926	27me3_down:1
G0s2	1.63445	chr1_192855076_192855436	27me3_down:1
G0s2	1.63445	chr1_193152576_193157206	4me3_up:14
G0s2	1.63445	chr1_193258856_193263946	4me3_up:14
G0s2	1.63445	chr1_193157386_193161606	4me3_up:4
G0s2	1.63445	chr1_193328006_193328626	4me3_up:3
G0s2	1.63445	chr1_193326066_193327886	4me3_up:1
G0s2	1.63445	chr1_192814046_192824926	27ac_up:1
Abcb1b	1.62432	chr5_8621000_8622480	4me1_up:6
Abcb1b	1.62432	chr5_9031870_9032630	4me3_up:1
Abcb1b	1.62432	chr5_9036720_9038450	4me3_up:1
Abcb1b	1.62432	chr5_9066480_9072160	27ac_up:5
Apoa4	1.62315	chr9_46241587_46241977	4me3_up:1
Apoa4	1.62315	chr9_46256697_46258377	4me3_up:3
Apoa4	1.62315	chr9_46241197_46241467	4me3_up:1
Apoa4	1.62315	chr9_46194577_46195407	27ac_up:1
Apoa4	1.62315	chr9_46198707_46201997	27ac_up:1
Apoa4	1.62315	chr9_46198297_46198547	27ac_up:1
Cyb561	1.62258	chr11_105974876_105975206	4me1_up:1
Cyb561	1.62258	chr11_105975396_105975526	4me1_up:1
Cyb561	1.62258	chr11_105973876_105974096	4me1_up:1
Cyb561	1.62258	chr11_105975666_105976536	4me1_up:2
Cyb561	1.62258	chr11_105974226_105974666	4me1_up:1
Cyb561	1.62258	chr11_106019146_106020116	27me3_down:6
Cyb561	1.62258	chr11_105990476_105991186	4me3_up:1
Cyb561	1.62258	chr11_105937836_105944106	27ac_up:19
Cyb561	1.62258	chr11_106053246_106055366	27ac_up:2
Cyb561	1.62258	chr11_106057596_106058696	27ac_up:1
Ttbk1	1.61975	chr17_46721871_46724381	4me1_up:1
Ttbk1	1.61975	chr17_46672841_46674191	4me3_up:4;27ac_up:4
Ttbk1	1.61975	chr17_46437421_46437991	4me3_up:1
Ttbk1	1.61975	chr17_46675151_46676311	4me3_up:2;27ac_up:2
Ttbk1	1.61975	chr17_46520641_46520771	4me3_up:1
Ttbk1	1.61975	chr17_46437231_46437321	4me3_up:1
Pnldc1	1.61594	chr17_12667324_12675244	4me3_up:2
Pnldc1	1.61594	chr17_12662874_12664384	27ac_up:2
Pnldc1	1.61594	chr17_12662634_12662754	27ac_up:1
Pnldc1	1.61594	chr17_12664554_12666624	27ac_up:1
C8a	1.60728	chr4_104913395_104916515	4me3_up:3
C8a	1.60728	chr4_104986285_104988145	4me3_up:1;27ac_up:1
C8a	1.60728	chr4_104874265_104875505	27ac_up:1
C8a	1.60728	chr4_104985015_104986255	27ac_up:1
C8a	1.60728	chr4_104824535_104825185	27ac_up:1
C8a	1.60728	chr4_104873485_104874085	27ac_up:1
C8a	1.60728	chr4_104803855_104805215	27ac_up:1
Sult5a1	1.58352	chr8_123061620_123062420	4me1_up:1;27ac_up:1
Sult5a1	1.58352	chr8_123411660_123415630	27me3_down:7
Sult5a1	1.58352	chr8_122867390_122875830	4me3_up:3
Sult5a1	1.58352	chr8_123243790_123245110	4me3_up:1
Sult5a1	1.58352	chr8_123291470_123293160	4me3_up:1;27ac_up:1
Bdh2	1.58222	chr3_135512556_135517896	4me1_up:3
Bdh2	1.58222	chr3_135281366_135282886	4me3_up:3
Nudt7	1.58061	chr8_114132300_114133400	4me3_up:1;27ac_up:1
Nudt7	1.58061	chr8_114136490_114146380	4me3_up:3;27ac_up:3
Nudt7	1.58061	chr8_114584660_114610320	4me3_up:2
Nudt7	1.58061	chr8_114563840_114565840	4me3_up:1
Nudt7	1.58061	chr8_114114810_114117240	27ac_up:8
Nudt7	1.58061	chr8_114089310_114091730	27ac_up:1
Nudt7	1.58061	chr8_114093970_114095610	27ac_up:1
Hapln4	1.57892	chr8_70373931_70374371	27me3_down:1
Hapln4	1.57892	chr8_70110531_70111891	27me3_down:3
Hapln4	1.57892	chr8_69883201_69883291	27me3_down:1
Hapln4	1.57892	chr8_69885541_69885991	27me3_down:1
Hapln4	1.57892	chr8_70486131_70486221	27me3_down:1
Hapln4	1.57892	chr8_70499491_70500881	27me3_down:1
Hapln4	1.57892	chr8_70373641_70373851	27me3_down:1
Hapln4	1.57892	chr8_70493391_70497491	27me3_down:1
Hapln4	1.57892	chr8_70501041_70501101	27me3_down:1
Hapln4	1.57892	chr8_69883451_69883981	27me3_down:1
Hapln4	1.57892	chr8_70376111_70376191	27me3_down:1
Hapln4	1.57892	chr8_70112621_70112721	27me3_down:1
Hapln4	1.57892	chr8_70486371_70487161	27me3_down:2
Hapln4	1.57892	chr8_70377251_70378611	27me3_down:1
Hapln4	1.57892	chr8_69886531_69887281	27me3_down:2
Hapln4	1.57892	chr8_69886261_69886431	27me3_down:1
Hapln4	1.57892	chr8_70112891_70114981	27me3_down:4
Hapln4	1.57892	chr8_70115381_70116581	27me3_down:1
Hapln4	1.57892	chr8_70374421_70374801	27me3_down:1
Hapln4	1.57892	chr8_70484431_70484531	27me3_down:1
Hapln4	1.57892	chr8_70484651_70484731	27me3_down:1
Hapln4	1.57892	chr8_70376541_70376631	27me3_down:1
Hapln4	1.57892	chr8_70374971_70375721	27me3_down:1
Hapln4	1.57892	chr8_70485181_70485671	27me3_down:1
Hapln4	1.57892	chr8_70376351_70376431	27me3_down:1
Hapln4	1.57892	chr8_70484841_70485071	27me3_down:1
Hapln4	1.57892	chr8_70376741_70377091	27me3_down:1
Hapln4	1.57892	chr8_70375861_70376041	27me3_down:1
Hapln4	1.57892	chr8_70485821_70486031	27me3_down:1
Hapln4	1.57892	chr8_70539841_70543071	4me3_up:2
Hapln4	1.57892	chr8_70628641_70629391	4me3_up:1
Hapln4	1.57892	chr8_70583991_70585151	27ac_up:1
Hapln4	1.57892	chr8_70586021_70586811	27ac_up:1
Hapln4	1.57892	chr8_70581811_70583871	27ac_up:1
Selenbp2	1.56726	chr3_95328708_95330608	4me1_up:1
Selenbp2	1.56726	chr3_95427398_95429578	4me1_up:1
Selenbp2	1.56726	chr3_94883558_94884318	4me1_up:1
Selenbp2	1.56726	chr3_94362538_94364628	27ac_up:2
Selenbp2	1.56726	chr3_95134988_95137618	27ac_up:5
Sdr9c7	1.56483	chr10_127961474_127962074	4me1_up:1
Sdr9c7	1.56483	chr10_127886354_127887414	4me3_up:1
Sdr9c7	1.56483	chr10_127903734_127909744	4me3_up:1
Sdr9c7	1.56483	chr10_127595444_127605404	4me3_up:1
Nrg4	1.53984	chr9_55542653_55544073	4me3_up:2
Nrg4	1.53984	chr9_55227933_55236433	4me3_up:1;27ac_up:2
Nrg4	1.53984	chr9_55544353_55544933	4me3_up:1
Nrg4	1.53984	chr9_55236513_55242053	27ac_up:2
Nrg4	1.53984	chr9_55294243_55298373	27ac_up:2
Nrg4	1.53984	chr9_55326283_55335753	27ac_up:1
Fam47e	1.5334	chr5_92485354_92505184	4me3_up:7
Fam47e	1.5334	chr5_92524524_92525644	4me3_up:3
Fam47e	1.5334	chr5_92364774_92379484	4me3_up:1
Fam47e	1.5334	chr5_92464234_92474714	4me3_up:2
Fam47e	1.5334	chr5_92570774_92573044	4me3_up:1
Fam47e	1.5334	chr5_92772904_92775314	27ac_up:1
Fam47e	1.5334	chr5_92682424_92684574	27ac_up:2
Fam47e	1.5334	chr5_92599144_92599754	27ac_up:1
Fam47e	1.5334	chr5_92602374_92604874	27ac_up:7
Fam47e	1.5334	chr5_92760374_92765774	27ac_up:1
Fam47e	1.5334	chr5_92541114_92541704	27ac_up:1
Fam47e	1.5334	chr5_92606714_92608114	27ac_up:1
Ces1e	1.5167	chr8_93276101_93279971	4me1_up:3;4me3_up:3;27ac_up:3
Ces1e	1.5167	chr8_93261141_93262111	4me1_up:2;27ac_up:2
Ces1e	1.5167	chr8_93263391_93264051	4me1_up:1;27ac_up:1
Ces1e	1.5167	chr8_93227701_93229361	4me3_up:3;27ac_up:3
Ces1e	1.5167	chr8_93333731_93335011	27ac_up:1
Ces1e	1.5167	chr8_93335221_93337101	27ac_up:1
Ces1e	1.5167	chr8_93252561_93253151	27ac_up:1
Adh4	1.5164	chr3_138418476_138419186	4me1_up:2;27ac_up:2
Adh4	1.5164	chr3_138419326_138420616	4me1_up:1
Adh4	1.5164	chr3_138237706_138239486	4me3_up:1
Adh4	1.5164	chr3_138234226_138237596	4me3_up:1
Adh4	1.5164	chr3_138374206_138376256	4me3_up:1;27ac_up:1
Adh4	1.5164	chr3_138453586_138455326	27ac_up:1
Adh4	1.5164	chr3_138411136_138412866	27ac_up:1
Adh4	1.5164	chr3_138381006_138381626	27ac_up:1
Plk3	1.50084	chr4_117312525_117319325	27me3_down:4
Plk3	1.50084	chr4_117309595_117311535	27me3_down:1
Plk3	1.50084	chr4_117341905_117344625	4me3_up:3;27ac_up:3
Plk3	1.50084	chr4_116878055_116879305	27ac_up:3
Serinc2	1.48606	chr4_130005546_130006746	27me3_down:4
Serinc2	1.48606	chr4_129985306_129989156	27me3_down:6
Serinc2	1.48606	chr4_130008426_130009206	27me3_down:1
Serinc2	1.48606	chr4_130009546_130009646	27me3_down:1
Serinc2	1.48606	chr4_130009396_130009476	27me3_down:1
Serinc2	1.48606	chr4_130792575_130816835	4me3_up:4
Serinc2	1.48606	chr4_130630065_130632805	4me3_up:2
Serinc2	1.48606	chr4_129874616_129885236	4me3_up:4
Serinc2	1.48606	chr4_130265956_130275086	27ac_up:15
Serinc2	1.48606	chr4_130275666_130277366	27ac_up:1
Serinc2	1.48606	chr4_130635845_130643705	27ac_up:10
Serinc2	1.48606	chr4_130275216_130275456	27ac_up:2
Smyd1	1.477	chr6_71189446_71191026	4me3_up:1
Smyd1	1.477	chr6_71237486_71238006	4me3_up:2
Smyd1	1.477	chr6_71235786_71237356	4me3_up:3
Smyd1	1.477	chr6_71197186_71199556	4me3_up:1
Kcnk10	1.47133	chr12_98554990_98574150	27me3_down:5
Kcnk10	1.47133	chr12_98575120_98577780	27me3_down:7
Kcnk10	1.47133	chr12_98574710_98575040	27me3_down:1
Kcnk10	1.47133	chr12_98715190_98718120	4me3_up:1
Ces3a	1.46904	chr8_105000210_105001500	4me1_up:3;27ac_up:3
Ces3a	1.46904	chr8_104997780_104999680	4me1_up:1;27ac_up:1
Ces3a	1.46904	chr8_105045900_105047110	27ac_up:1
Ces3a	1.46904	chr8_105054500_105055270	27ac_up:1
Hspa1b	1.46413	chr17_34673535_34678565	27me3_down:4
Hspa1b	1.46413	chr17_34743655_34743755	4me3_up:1
Hspa1b	1.46413	chr17_35215345_35220165	4me3_up:9
Hspa1b	1.46413	chr17_34655065_34660525	4me3_up:1
Hspa1b	1.46413	chr17_35200905_35201075	4me3_up:1
Hspa1b	1.46413	chr17_35173275_35175965	4me3_up:1
Hspa1b	1.46413	chr17_34743005_34743465	4me3_up:1
Hspa1b	1.46413	chr17_35200555_35200855	4me3_up:2
Hspa1b	1.46413	chr17_35201135_35202365	4me3_up:2
Gm14403	1.45806	chr2_177201595_177207705	4me3_up:3
Camk2n2	1.45625	chr16_20535597_20537617	4me3_up:28
Camk2n2	1.45625	chr16_20537727_20539307	4me3_up:11
Camk2n2	1.45625	chr16_20729217_20730497	4me3_up:4
Camk2n2	1.45625	chr16_20730597_20733117	4me3_up:4
Cd207	1.44651	chr6_83710926_83711256	27me3_down:3
Cd207	1.44651	chr6_83712196_83721206	27me3_down:2
Cd207	1.44651	chr6_83711536_83712096	27me3_down:1
Hsph1	1.43711	chr5_149439785_149445765	27me3_down:19
Ugt2a3	1.42967	chr5_87347465_87348335	27ac_up:1
Ly6d	1.42037	chr15_74516860_74520030	27me3_down:2
Ly6d	1.42037	chr15_74924740_74941970	4me3_up:21
Ly6d	1.42037	chr15_74920370_74922250	4me3_up:1
Ly6d	1.42037	chr15_74762580_74762750	4me3_up:1;27ac_up:1
Ly6d	1.42037	chr15_74995470_74996450	4me3_up:1;27ac_up:1
Ly6d	1.42037	chr15_74783970_74785130	4me3_up:1;27ac_up:1
Ly6d	1.42037	chr15_74987820_74990140	4me3_up:1;27ac_up:1
Ly6d	1.42037	chr15_74762840_74763500	4me3_up:2;27ac_up:2
Ly6d	1.42037	chr15_74996560_74997530	4me3_up:1;27ac_up:1
Ly6d	1.42037	chr15_74997630_74997840	4me3_up:1;27ac_up:1
Ly6d	1.42037	chr15_74721800_74723450	27ac_up:7
Ly6d	1.42037	chr15_74679260_74679480	27ac_up:1
Ly6d	1.42037	chr15_74993430_74994870	27ac_up:1
Bmyc	1.41203	chr2_25403360_25406210	27me3_down:2
Bmyc	1.41203	chr2_25864060_25868500	27me3_down:2
Bmyc	1.41203	chr2_25363380_25363800	27ac_up:1
Bmyc	1.41203	chr2_25362840_25363240	27ac_up:1
Bmyc	1.41203	chr2_25364680_25364880	27ac_up:1
Bmyc	1.41203	chr2_25364270_25364510	27ac_up:1
Bmyc	1.41203	chr2_25364890_25366020	27ac_up:3
Bmyc	1.41203	chr2_25363990_25364100	27ac_up:1
Syt12	1.41044	chr19_4470500_4476930	4me1_up:1;27ac_up:10
Syt12	1.41044	chr19_4487140_4496780	4me3_up:6
Syt12	1.41044	chr19_4037390_4037580	4me3_up:1;27ac_up:1
Syt12	1.41044	chr19_4037190_4037280	4me3_up:1;27ac_up:1
Syt12	1.41044	chr19_4838900_4839190	4me3_up:1
Syt12	1.41044	chr19_4456880_4457250	4me3_up:1
Syt12	1.41044	chr19_4037620_4037860	4me3_up:1;27ac_up:1
Syt12	1.41044	chr19_4035930_4036680	4me3_up:1;27ac_up:1
Syt12	1.41044	chr19_4036790_4037100	4me3_up:1;27ac_up:1
Syt12	1.41044	chr19_4794000_4801280	27ac_up:2
Syt12	1.41044	chr19_4214630_4215730	27ac_up:1
Alas2	1.41031	chrX_150440897_150440977	4me3_up:1;27ac_up:1
Alas2	1.41031	chrX_150441137_150442027	4me3_up:2;27ac_up:2
Alas2	1.41031	chrX_150439797_150440757	4me3_up:2;27ac_up:2
Col5a3	1.40979	chr9_20780376_20781806	4me1_up:2;27ac_up:2
Col5a3	1.40979	chr9_20781856_20782486	4me1_up:2;27ac_up:2
Col5a3	1.40979	chr9_21033806_21034546	27me3_down:4
Col5a3	1.40979	chr9_21037116_21037576	27me3_down:2
Col5a3	1.40979	chr9_21032326_21033086	27me3_down:3
Col5a3	1.40979	chr9_20724506_20728106	27me3_down:3;27ac_up:3
Col5a3	1.40979	chr9_21033356_21033486	27me3_down:1
Col5a3	1.40979	chr9_21035636_21036876	27me3_down:2
Col5a3	1.40979	chr9_21034826_21035036	27me3_down:1
Col5a3	1.40979	chr9_21037836_21038636	27me3_down:1
Col5a3	1.40979	chr9_20986786_20992736	4me3_up:5
Col5a3	1.40979	chr9_21286676_21288756	4me3_up:1
Col5a3	1.40979	chr9_20810096_20814856	4me3_up:3
Col5a3	1.40979	chr9_20804976_20806936	4me3_up:1;27ac_up:1
Col5a3	1.40979	chr9_20969736_20976596	27ac_up:18
Col5a3	1.40979	chr9_20793986_20795656	27ac_up:9
Col5a3	1.40979	chr9_20789006_20792376	27ac_up:2
Col5a3	1.40979	chr9_20793756_20793946	27ac_up:1
Cpeb1	1.40812	chr7_81926594_81933934	27me3_down:1
Cpeb1	1.40812	chr7_81451504_81454624	27ac_up:11
Atp8b4	1.39715	chr2_126534454_126535044	4me1_up:1;27ac_up:1
Atp8b4	1.39715	chr2_126617184_126618514	4me3_up:1
Atp8b4	1.39715	chr2_126607404_126610134	4me3_up:7
Atp8b4	1.39715	chr2_126606474_126607294	4me3_up:1
Atp8b4	1.39715	chr2_126358344_126358764	27ac_up:1
Atp8b4	1.39715	chr2_126523384_126524804	27ac_up:1
Retsat	1.38469	chr6_72580366_72586436	4me1_up:1;4me3_up:3;27ac_up:4
Retsat	1.38469	chr6_72586506_72587606	4me1_up:1;27ac_up:1
Retsat	1.38469	chr6_72612106_72614066	4me3_up:6
Retsat	1.38469	chr6_72223926_72234386	4me3_up:8;27ac_up:8
Retsat	1.38469	chr6_72598796_72600966	4me3_up:28;27ac_up:28
Retsat	1.38469	chr6_72614146_72615516	4me3_up:9
Retsat	1.38469	chr6_72616446_72616676	4me3_up:6
Retsat	1.38469	chr6_72596466_72598316	4me3_up:23;27ac_up:23
Retsat	1.38469	chr6_72547486_72549266	4me3_up:14
Retsat	1.38469	chr6_72500326_72524006	4me3_up:16;27ac_up:18
Retsat	1.38469	chr6_72549496_72549646	4me3_up:1
Retsat	1.38469	chr6_72636536_72637076	4me3_up:1
Retsat	1.38469	chr6_72595016_72596426	4me3_up:1;27ac_up:1
Retsat	1.38469	chr6_72601146_72601466	27ac_up:1
Retsat	1.38469	chr6_72591526_72594656	27ac_up:1
Ugt2b5	1.36795	chr5_87339595_87340845	4me1_up:1;4me3_up:1;27ac_up:1
Ugt2b5	1.36795	chr5_87336415_87337275	4me1_up:1;27ac_up:1
1700037H04Rik	1.35719	chr2_131163744_131165304	4me1_up:1;4me3_up:1;27ac_up:1
1700037H04Rik	1.35719	chr2_131041144_131041224	27me3_down:2;27ac_up:2
1700037H04Rik	1.35719	chr2_131041334_131041394	27me3_down:1;27ac_up:1
1700037H04Rik	1.35719	chr2_131041754_131042604	27me3_down:6;27ac_up:6
1700037H04Rik	1.35719	chr2_131546534_131558224	27me3_down:1
1700037H04Rik	1.35719	chr2_131559374_131561074	27me3_down:1
1700037H04Rik	1.35719	chr2_131040474_131041014	27me3_down:2;27ac_up:2
1700037H04Rik	1.35719	chr2_131390684_131398114	27ac_up:8
1700037H04Rik	1.35719	chr2_131317184_131329914	27ac_up:20
1700037H04Rik	1.35719	chr2_131425664_131429684	27ac_up:3
1700037H04Rik	1.35719	chr2_131153704_131159944	27ac_up:2
1700037H04Rik	1.35719	chr2_131429974_131432564	27ac_up:2
1700037H04Rik	1.35719	chr2_131173304_131175484	27ac_up:1
Rfx4	1.35666	chr10_84409735_84429165	4me1_up:1;27ac_up:1
Rfx4	1.35666	chr10_84858595_84860495	4me3_up:4
Rfx4	1.35666	chr10_84885255_84887455	4me3_up:1
Rfx4	1.35666	chr10_84803055_84804045	27ac_up:1
Cgref1	1.35653	chr5_30832447_30835427	4me1_up:3;27ac_up:3
Cgref1	1.35653	chr5_30835497_30835887	4me1_up:1;27ac_up:1
Cgref1	1.35653	chr5_31137617_31137987	27me3_down:1
Cgref1	1.35653	chr5_30712167_30714707	27me3_down:11
Cgref1	1.35653	chr5_30588617_30621887	27me3_down:2
Cgref1	1.35653	chr5_30582937_30588167	27me3_down:1
Cgref1	1.35653	chr5_31137207_31137467	27me3_down:1
Cgref1	1.35653	chr5_31138527_31138787	27me3_down:1
Cgref1	1.35653	chr5_30959407_30959967	4me3_up:9
Cgref1	1.35653	chr5_30762337_30770117	4me3_up:7
Cgref1	1.35653	chr5_31452057_31453147	4me3_up:1
Cgref1	1.35653	chr5_30956327_30957887	4me3_up:4
Cgref1	1.35653	chr5_30958547_30958707	4me3_up:1
Cgref1	1.35653	chr5_30958057_30958227	4me3_up:1
Cgref1	1.35653	chr5_30958927_30959217	4me3_up:2
Cgref1	1.35653	chr5_30958357_30958467	4me3_up:2
Cgref1	1.35653	chr5_30814897_30820037	27ac_up:16
Cgref1	1.35653	chr5_30943497_30945357	27ac_up:8
Cgref1	1.35653	chr5_30484087_30485577	27ac_up:1
Oasl1	1.35406	chr5_115204381_115206601	27me3_down:2
Oasl1	1.35406	chr5_115189251_115193651	27me3_down:2
Oasl1	1.35406	chr5_114923331_114923401	4me3_up:1;27ac_up:1
Oasl1	1.35406	chr5_114923601_114928021	4me3_up:7;27ac_up:10
Oasl1	1.35406	chr5_114932351_114933921	4me3_up:2
Ahcyl2	1.34812	chr6_29820120_29822550	4me1_up:1
Ahcyl2	1.34812	chr6_29831980_29832740	4me1_up:1
Ahcyl2	1.34812	chr6_29788550_29791020	4me1_up:3
Ahcyl2	1.34812	chr6_29857420_29859590	4me1_up:4
Ahcyl2	1.34812	chr6_30170460_30172080	27me3_down:1
Ahcyl2	1.34812	chr6_30023440_30031480	4me3_up:7
Ahcyl2	1.34812	chr6_29512820_29514840	4me3_up:1
Ahcyl2	1.34812	chr6_29505800_29507850	27ac_up:5
Ahcyl2	1.34812	chr6_29847050_29851030	27ac_up:9
Ahcyl2	1.34812	chr6_29529480_29531120	27ac_up:5
Ahcyl2	1.34812	chr6_29537320_29540830	27ac_up:1
Oplah	1.33552	chr15_76519670_76521590	27me3_down:3
Oplah	1.33552	chr15_75998260_75998370	27me3_down:1
Oplah	1.33552	chr15_75999150_76001090	27me3_down:2
Oplah	1.33552	chr15_75997700_75997820	27me3_down:1
Oplah	1.33552	chr15_75997930_75998050	27me3_down:1
Oplah	1.33552	chr15_75998470_75998540	27me3_down:1
Oplah	1.33552	chr15_75995320_75995820	27me3_down:1;27ac_up:1
Oplah	1.33552	chr15_75995950_75996040	27me3_down:1
Oplah	1.33552	chr15_75997160_75997560	27me3_down:1
Oplah	1.33552	chr15_75998670_75998770	27me3_down:1
Oplah	1.33552	chr15_75996200_75996370	27me3_down:1
Oplah	1.33552	chr15_75996510_75997110	27me3_down:1
Oplah	1.33552	chr15_76194810_76195420	4me3_up:2
Oplah	1.33552	chr15_76200600_76203500	4me3_up:8
Oplah	1.33552	chr15_76112770_76119100	4me3_up:11
Oplah	1.33552	chr15_76576490_76580600	4me3_up:2
Oplah	1.33552	chr15_76199830_76200460	4me3_up:2
Oplah	1.33552	chr15_76306690_76307220	4me3_up:5;27ac_up:5
Oplah	1.33552	chr15_76305570_76305660	4me3_up:1;27ac_up:1
Oplah	1.33552	chr15_76195710_76197970	4me3_up:4
Oplah	1.33552	chr15_76194570_76194750	4me3_up:1
Oplah	1.33552	chr15_76305760_76306190	4me3_up:3;27ac_up:3
Oplah	1.33552	chr15_76305050_76305130	4me3_up:1;27ac_up:1
Oplah	1.33552	chr15_76306390_76306470	4me3_up:1;27ac_up:1
Oplah	1.33552	chr15_76194000_76194340	4me3_up:1
Oplah	1.33552	chr15_76193480_76193960	4me3_up:1
Oplah	1.33552	chr15_76199400_76199540	4me3_up:1
Oplah	1.33552	chr15_75992760_75995070	4me3_up:1;27ac_up:1
Oplah	1.33552	chr15_76120190_76120250	4me3_up:1
Oplah	1.33552	chr15_75995100_75995230	4me3_up:1;27ac_up:1
Oplah	1.33552	chr15_76194430_76194550	4me3_up:1
Oplah	1.33552	chr15_76293540_76295890	27ac_up:6
Oplah	1.33552	chr15_76295980_76296070	27ac_up:1
Oplah	1.33552	chr15_76263490_76264880	27ac_up:1
Oplah	1.33552	chr15_76296140_76296220	27ac_up:1
Oplah	1.33552	chr15_76267500_76268080	27ac_up:1
Inhbe	1.3354	chr10_127325624_127325834	4me3_up:1
Inhbe	1.3354	chr10_127322884_127323724	4me3_up:4
Inhbe	1.3354	chr10_127322424_127322684	4me3_up:1
Inhbe	1.3354	chr10_127605664_127605784	4me3_up:1
Inhbe	1.3354	chr10_127595444_127605404	4me3_up:3
Inhbe	1.3354	chr10_127100274_127102814	27ac_up:2
Inhbe	1.3354	chr10_127099704_127099884	27ac_up:1
Inhbe	1.3354	chr10_127099984_127100084	27ac_up:1
Tifa	1.32219	chr3_127847492_127850772	4me1_up:3;27ac_up:3
Tifa	1.32219	chr3_127790162_127791472	4me1_up:6;4me3_up:6;27ac_up:6
Tifa	1.32219	chr3_127791522_127795742	4me1_up:16;4me3_up:16;27ac_up:16
Tifa	1.32219	chr3_127801862_127804092	4me1_up:3
Tifa	1.32219	chr3_127695752_127697402	27me3_down:2
Tifa	1.32219	chr3_127744022_127751742	27me3_down:5
Tifa	1.32219	chr3_127693802_127695552	27me3_down:4
Tifa	1.32219	chr3_127639612_127641742	27me3_down:1
Tifa	1.32219	chr3_127633452_127633722	27me3_down:1
Tifa	1.32219	chr3_127635622_127636242	27me3_down:1
Cadps2	1.31505	chr6_23831380_23838780	27ac_up:5
Ncam2	1.31167	chr16_81200965_81201245	27ac_up:4
Mgst1	1.30873	chr6_138080009_138082109	4me1_up:1;4me3_up:1;27ac_up:1
Mgst1	1.30873	chr6_138140599_138150759	4me3_up:25
Lamb3	1.29202	chr1_193152576_193157206	4me3_up:19
Lamb3	1.29202	chr1_193258856_193263946	4me3_up:15
Lamb3	1.29202	chr1_193157386_193161606	4me3_up:5
Lamb3	1.29202	chr1_193328006_193328626	4me3_up:3
Lamb3	1.29202	chr1_193326066_193327886	4me3_up:1
Zswim5	1.29169	chr4_117309595_117311535	27me3_down:1
Zswim5	1.29169	chr4_116878055_116879305	27ac_up:10
Gm7694	1.28792	chr1_170103769_170114489	4me3_up:2
Gm7694	1.28792	chr1_170515219_170517619	27ac_up:1
Neb	1.28656	chr2_52377340_52380890	4me3_up:5;27ac_up:5
Neb	1.28656	chr2_52371070_52372560	4me3_up:2;27ac_up:2
Neb	1.28656	chr2_52558610_52581670	4me3_up:2
Neb	1.28656	chr2_52373680_52375840	27ac_up:2
Apol9b	1.27954	chr15_77405700_77411980	4me1_up:2;4me3_up:3;27ac_up:3
Apol9b	1.27954	chr15_77827220_77841950	4me3_up:11
Apol9b	1.27954	chr15_77396500_77398930	4me3_up:3
Apol9b	1.27954	chr15_77368170_77368450	4me3_up:1;27ac_up:1
Apol9b	1.27954	chr15_77901960_77915050	27ac_up:28
Apol9b	1.27954	chr15_77792340_77795960	27ac_up:6
Apol9b	1.27954	chr15_77796050_77806830	27ac_up:2
Apol9b	1.27954	chr15_77362370_77365480	27ac_up:1
Plin4	1.268	chr17_56133847_56134067	4me3_up:1
Plin4	1.268	chr17_56108637_56109307	4me3_up:5
Plin4	1.268	chr17_56132377_56132497	4me3_up:1
Plin4	1.268	chr17_56109447_56109537	4me3_up:1
Plin4	1.268	chr17_56107367_56108587	4me3_up:5
Plin4	1.268	chr17_56132617_56132707	4me3_up:1
Plin4	1.268	chr17_56466337_56476337	4me3_up:1
Plin4	1.268	chr17_56132867_56133607	4me3_up:2
Plin4	1.268	chr17_56109597_56109687	4me3_up:1
Slc22a5	1.26436	chr11_53885168_53891138	4me3_up:19
Rd3	1.26327	chr1_191692021_191694721	4me3_up:1
Rd3	1.26327	chr1_191623681_191630341	27ac_up:1
Slc35e3	1.25043	chr10_118033184_118054804	4me3_up:4
Slc35e3	1.25043	chr10_117433644_117436044	4me3_up:2;27ac_up:1
Slc35e3	1.25043	chr10_117456154_117457814	4me3_up:1
Slc35e3	1.25043	chr10_117493114_117495224	4me3_up:2;27ac_up:2
Slc35e3	1.25043	chr10_117280804_117282104	4me3_up:1;27ac_up:1
Slc35e3	1.25043	chr10_117278714_117280634	4me3_up:1
Slc35e3	1.25043	chr10_117889674_117915454	27ac_up:31
Slc35e3	1.25043	chr10_117736224_117740504	27ac_up:7
Slc35e3	1.25043	chr10_117733334_117733674	27ac_up:1
Slc35e3	1.25043	chr10_117359144_117360434	27ac_up:1
Slc35e3	1.25043	chr10_117717024_117719364	27ac_up:1
Gabbr2	1.25008	chr4_46301238_46311378	4me3_up:1
Gabbr2	1.25008	chr4_46953328_46969228	4me3_up:3;27ac_up:3
Gabbr2	1.25008	chr4_46879398_46891928	4me3_up:4
Gabbr2	1.25008	chr4_47291658_47292318	27ac_up:1
Gabbr2	1.25008	chr4_47292528_47293178	27ac_up:2
Gabbr2	1.25008	chr4_46893458_46902128	27ac_up:3
Gabbr2	1.25008	chr4_47292368_47292468	27ac_up:1
Gabbr2	1.25008	chr4_47296118_47297058	27ac_up:2
Gabbr2	1.25008	chr4_47293248_47293358	27ac_up:1
Ttc39c	1.24943	chr18_12681421_12684831	4me1_up:3
Ttc39c	1.24943	chr18_12684881_12686951	4me1_up:1;27ac_up:1
Ttc39c	1.24943	chr18_12713851_12714921	4me1_up:1
Ttc39c	1.24943	chr18_12562961_12564791	4me1_up:1;27ac_up:1
Ttc39c	1.24943	chr18_12699871_12700731	4me1_up:1
Ttc39c	1.24943	chr18_12709331_12711711	4me1_up:1;27ac_up:1
Ttc39c	1.24943	chr18_12666671_12679361	4me1_up:1;27ac_up:3
Ttc39c	1.24943	chr18_12697461_12697881	4me1_up:1
Ttc39c	1.24943	chr18_12698051_12698731	4me1_up:1
Ttc39c	1.24943	chr18_12715151_12717351	4me1_up:1
Ttc39c	1.24943	chr18_12644041_12650741	4me3_up:19
Ttc39c	1.24943	chr18_12972371_12974711	4me3_up:3
Ttc39c	1.24943	chr18_12524831_12525001	27ac_up:1
Ttc39c	1.24943	chr18_12523331_12524501	27ac_up:2
Ttc39c	1.24943	chr18_12524611_12524721	27ac_up:1
Ttc39c	1.24943	chr18_12830541_12834811	27ac_up:1
Ttc39c	1.24943	chr18_12525171_12525781	27ac_up:1
Ttc39c	1.24943	chr18_12828581_12829801	27ac_up:1
Camk2b	1.24243	chr11_6015507_6022887	4me1_up:8;27ac_up:13
Camk2b	1.24243	chr11_6001387_6013297	4me1_up:5;4me3_up:4
Camk2b	1.24243	chr11_6060327_6065467	27me3_down:11
Camk2b	1.24243	chr11_6028957_6033107	4me3_up:2;27ac_up:2
Scp2	1.23224	chr4_108113845_108118375	4me1_up:22;4me3_up:22;27ac_up:22
Scp2	1.23224	chr4_108093095_108093845	4me1_up:1
Scp2	1.23224	chr4_108099795_108102055	4me1_up:1
Scp2	1.23224	chr4_108077875_108085385	4me1_up:3;4me3_up:5
Scp2	1.23224	chr4_108085895_108087455	4me1_up:1;27ac_up:1
Scp2	1.23224	chr4_108013525_108014785	4me1_up:1
Scp2	1.23224	chr4_108095675_108096245	4me1_up:1
Scp2	1.23224	chr4_107803365_107805345	27me3_down:16
Scp2	1.23224	chr4_107807545_107809745	27me3_down:1
Scp2	1.23224	chr4_107802515_107803245	27me3_down:4
Scp2	1.23224	chr4_107434895_107435635	27me3_down:1
Scp2	1.23224	chr4_107916295_107923305	4me3_up:31
Scp2	1.23224	chr4_108110295_108112225	4me3_up:1;27ac_up:1
Scp2	1.23224	chr4_108136205_108138195	27ac_up:1
Cd59b	1.22963	chr2_104409663_104409923	27me3_down:1
Cd59b	1.22963	chr2_104127963_104129103	4me3_up:2
Cd59b	1.22963	chr2_103817223_103818213	4me3_up:1
Mypop	1.22501	chr7_19064271_19065301	27me3_down:1
Mypop	1.22501	chr7_18839951_18841461	4me3_up:10
Mypop	1.22501	chr7_18841511_18842781	4me3_up:2
Cyp2f2	1.22461	chr7_27333661_27334831	27me3_down:6
Cyp2f2	1.22461	chr7_27335711_27337421	27me3_down:2
Cyp2f2	1.22461	chr7_27334941_27335391	27me3_down:2
Cyp2f2	1.22461	chr7_27335531_27335651	27me3_down:1
Cyp2f2	1.22461	chr7_27176781_27178721	4me3_up:21
Cyp2f2	1.22461	chr7_27232471_27236901	4me3_up:11;27ac_up:11
Cyp2f2	1.22461	chr7_27180831_27180921	4me3_up:1
Cyp2f2	1.22461	chr7_27450691_27452411	4me3_up:1
Cyp2f2	1.22461	chr7_27120011_27120801	4me3_up:2
Cyp2f2	1.22461	chr7_27129891_27130291	4me3_up:1
Cyp2f2	1.22461	chr7_27179831_27180161	4me3_up:1
Cyp2f2	1.22461	chr7_27121231_27123341	4me3_up:1
Cyp2f2	1.22461	chr7_27180271_27180691	4me3_up:2
Cyp2f2	1.22461	chr7_27129351_27129711	4me3_up:1
Gnat1	1.21935	chr9_107705589_107710319	27me3_down:19;27ac_up:23
Gnat1	1.21935	chr9_107229849_107231469	27me3_down:1
Gnat1	1.21935	chr9_107659239_107661469	4me3_up:4
Gnat1	1.21935	chr9_107662269_107667129	4me3_up:11
Gnat1	1.21935	chr9_107667399_107668849	4me3_up:8
Gnat1	1.21935	chr9_107675579_107675879	4me3_up:4
Gnat1	1.21935	chr9_107677019_107677119	4me3_up:1
Gnat1	1.21935	chr9_107676669_107676889	4me3_up:1
Gnat1	1.21935	chr9_107676349_107676539	4me3_up:1
Syt11	1.21764	chr3_88648048_88651888	4me1_up:1
Syt11	1.21764	chr3_88215678_88217528	27me3_down:1
Syt11	1.21764	chr3_88196318_88205168	27me3_down:2
Syt11	1.21764	chr3_89317678_89322698	27me3_down:2
Syt11	1.21764	chr3_88220218_88234878	27me3_down:1
Syt11	1.21764	chr3_88769888_88772648	4me3_up:29;27ac_up:29
Syt11	1.21764	chr3_89229168_89229908	4me3_up:2;27ac_up:2
Syt11	1.21764	chr3_89238698_89238888	4me3_up:1
Syt11	1.21764	chr3_89237918_89238658	4me3_up:1
Syt11	1.21764	chr3_89239018_89239268	4me3_up:1
Syt11	1.21764	chr3_89226438_89226518	27ac_up:1
Scd1	1.2149	chr19_44254060_44269960	27me3_down:49
Scd1	1.2149	chr19_44514270_44516680	27me3_down:6
Scd1	1.2149	chr19_44247150_44253180	27me3_down:5
Scd1	1.2149	chr19_44510540_44511230	27me3_down:1
Scd1	1.2149	chr19_44511370_44511530	27me3_down:1
Scd1	1.2149	chr19_44272950_44283670	27me3_down:4
Scd1	1.2149	chr19_44333510_44333990	27me3_down:1
Scd1	1.2149	chr19_44509880_44510420	27me3_down:1
Scd1	1.2149	chr19_44668690_44673360	27me3_down:1
Scd1	1.2149	chr19_44306860_44317690	4me3_up:31
Scd1	1.2149	chr19_44026550_44027580	4me3_up:1;27ac_up:1
Scd1	1.2149	chr19_44020910_44025710	27ac_up:6
Scd1	1.2149	chr19_44039580_44040740	27ac_up:1
Scd1	1.2149	chr19_44040830_44047630	27ac_up:3
Abcg2	1.209	chr6_58733646_58734186	4me1_up:1
Abcg2	1.209	chr6_58609486_58611336	4me3_up:1
Abcg2	1.209	chr6_59067226_59074086	27ac_up:2
Adra1a	1.19852	chr14_66653933_66662233	4me3_up:1
Adra1a	1.19852	chr14_66635603_66636973	4me3_up:1;27ac_up:1
Adra1a	1.19852	chr14_66672083_66673703	27ac_up:2
Arsa	1.19443	chr15_89478009_89483019	4me1_up:14;4me3_up:18;27ac_up:18
Arsa	1.19443	chr15_89146520_89146700	27me3_down:1
Arsa	1.19443	chr15_89146050_89146130	27me3_down:1
Arsa	1.19443	chr15_89146830_89149390	27me3_down:2
Arsa	1.19443	chr15_89146380_89146470	27me3_down:1
Arsa	1.19443	chr15_89146160_89146270	27me3_down:1
Arsa	1.19443	chr15_88863540_88864310	4me3_up:1
Arsa	1.19443	chr15_89476649_89477149	4me3_up:12;27ac_up:12
Arsa	1.19443	chr15_89474709_89474779	4me3_up:1;27ac_up:1
Arsa	1.19443	chr15_89475359_89475499	4me3_up:1;27ac_up:1
Arsa	1.19443	chr15_89474349_89474539	4me3_up:1;27ac_up:1
Arsa	1.19443	chr15_89474999_89475119	4me3_up:1;27ac_up:1
Arsa	1.19443	chr15_88864490_88864570	4me3_up:1
Arsa	1.19443	chr15_89477639_89477869	4me3_up:1;27ac_up:1
Arsa	1.19443	chr15_89474129_89474219	27ac_up:1
Cd4	1.19402	chr6_124998482_124998602	27me3_down:1
Cd4	1.19402	chr6_124855272_124855942	27me3_down:3
Cd4	1.19402	chr6_124862122_124863662	27me3_down:7
Cd4	1.19402	chr6_124860212_124860332	27me3_down:1
Cd4	1.19402	chr6_124996932_124998432	27me3_down:1
Cd4	1.19402	chr6_124998672_124998912	27me3_down:1
Cd4	1.19402	chr6_124879692_124888072	4me3_up:4
Cd4	1.19402	chr6_125350062_125356822	4me3_up:4
Serpina3k	1.19001	chr12_104471640_104471990	27me3_down:1
Ephx2	1.18204	chr14_65710443_65729583	4me1_up:3;4me3_up:3;27ac_up:5
Ephx2	1.18204	chr14_65968683_65971723	4me1_up:1;4me3_up:4
Ephx2	1.18204	chr14_65738503_65740283	4me1_up:1;27ac_up:1
Ephx2	1.18204	chr14_65666743_65670553	4me1_up:1;4me3_up:2;27ac_up:2
Ephx2	1.18204	chr14_65773343_65773823	4me1_up:1;27ac_up:1
Ephx2	1.18204	chr14_65971843_65972983	4me1_up:1;4me3_up:1
Ephx2	1.18204	chr14_65742173_65743133	4me1_up:1;27ac_up:1
Ephx2	1.18204	chr14_65670673_65689763	4me1_up:1;27ac_up:1
Ephx2	1.18204	chr14_65973473_65974143	4me1_up:1;4me3_up:1
Ephx2	1.18204	chr14_65740383_65742123	4me1_up:1;27ac_up:1
Ephx2	1.18204	chr14_65949603_65953493	27me3_down:1;27ac_up:1
Ephx2	1.18204	chr14_66254323_66280873	4me3_up:9;27ac_up:10
Ephx2	1.18204	chr14_66116793_66124253	4me3_up:5
Ephx2	1.18204	chr14_66110653_66112183	4me3_up:3
Ephx2	1.18204	chr14_66653933_66662233	4me3_up:1
Syvn1	1.1785	chr19_6418970_6427800	27me3_down:3
Syvn1	1.1785	chr19_6428770_6430140	27me3_down:1
Syvn1	1.1785	chr19_5448050_5450150	27me3_down:2
Syvn1	1.1785	chr19_6505050_6509770	27me3_down:2
Syvn1	1.1785	chr19_5450350_5453160	27me3_down:2
Syvn1	1.1785	chr19_5950480_5951140	4me3_up:3
Syvn1	1.1785	chr19_6164550_6166450	4me3_up:4
Syvn1	1.1785	chr19_5951200_5953060	4me3_up:3
Gna14	1.17678	chr19_16475750_16487710	4me1_up:1
Gna14	1.17678	chr19_16436810_16441710	4me3_up:10;27ac_up:10
Cys1	1.16533	chr12_25095365_25095655	4me3_up:1;27ac_up:1
Cys1	1.16533	chr12_25094575_25095305	4me3_up:1;27ac_up:1
Cys1	1.16533	chr12_24758045_24759055	27ac_up:3
Bmp7	1.16519	chr2_172659629_172664119	27me3_down:2
Bmp7	1.16519	chr2_172726469_172741439	27me3_down:8
Bmp7	1.16519	chr2_173153169_173153339	4me3_up:1
Bmp7	1.16519	chr2_173216999_173218739	4me3_up:4
Bmp7	1.16519	chr2_173156099_173156909	4me3_up:1
Bmp7	1.16519	chr2_173155359_173155929	4me3_up:1
Bmp7	1.16519	chr2_173157129_173157219	4me3_up:1
Bmp7	1.16519	chr2_173158079_173158189	4me3_up:1
Bmp7	1.16519	chr2_172922129_172940609	27ac_up:18
Bmp7	1.16519	chr2_173105239_173106029	27ac_up:1
Bmp7	1.16519	chr2_173107849_173108179	27ac_up:1
Bmp7	1.16519	chr2_173234459_173276079	27ac_up:11
Dhrs9	1.16479	chr2_69414293_69415503	4me3_up:2
Mbnl2	1.16059	chr14_120364308_120375408	4me1_up:12;27ac_up:12
Mbnl2	1.16059	chr14_120265038_120265668	4me1_up:1
Mbnl2	1.16059	chr14_120275898_120324788	4me1_up:6;4me3_up:12;27ac_up:15
Mbnl2	1.16059	chr14_120379308_120384398	4me3_up:8
Mbnl2	1.16059	chr14_120351278_120358148	4me3_up:19;27ac_up:19
Mbnl2	1.16059	chr14_120377088_120379148	4me3_up:7
Mbnl2	1.16059	chr14_120499078_120501678	27ac_up:1
Mbnl2	1.16059	chr14_120359438_120359928	27ac_up:1
S100a10	1.12984	chr3_93442458_93443388	27me3_down:3;4me3_up:3;27ac_up:3
S100a10	1.12984	chr3_93449068_93449218	27me3_down:1
S100a10	1.12984	chr3_93555208_93560938	4me3_up:29;27ac_up:29
S100a10	1.12984	chr3_93564638_93573478	4me3_up:16
Egfr	1.1285	chr11_16876357_16878117	4me1_up:1
Egfr	1.1285	chr11_16588417_16594457	4me1_up:14;27ac_up:14
Egfr	1.1285	chr11_16734597_16742197	4me1_up:1;27ac_up:1
Egfr	1.1285	chr11_16869087_16870967	4me1_up:2
Egfr	1.1285	chr11_16878257_16878687	4me1_up:1
Egfr	1.1285	chr11_16752567_16758837	4me3_up:17
Egfr	1.1285	chr11_16557697_16563017	4me3_up:4
Egfr	1.1285	chr11_16761767_16773817	4me3_up:6
Egfr	1.1285	chr11_16780377_16782207	4me3_up:1
Fbf1	1.12692	chr11_116205766_116214836	4me1_up:2;4me3_up:6;27ac_up:2
Fbf1	1.12692	chr11_116281846_116282906	27me3_down:5
Fbf1	1.12692	chr11_116532086_116532436	27me3_down:1
Fbf1	1.12692	chr11_116532686_116533236	27me3_down:1
Fbf1	1.12692	chr11_116533366_116533966	27me3_down:1
Fbf1	1.12692	chr11_116189566_116198216	4me3_up:19
Fbf1	1.12692	chr11_116199036_116204186	4me3_up:45
Fbf1	1.12692	chr11_116198376_116198586	4me3_up:5
Fbf1	1.12692	chr11_116076546_116076746	4me3_up:1
Fbf1	1.12692	chr11_116183616_116189406	4me3_up:5
Fbf1	1.12692	chr11_116076786_116077446	4me3_up:7
Fbf1	1.12692	chr11_116393966_116396186	4me3_up:6
Fbf1	1.12692	chr11_116076326_116076436	4me3_up:1
Fbf1	1.12692	chr11_116077656_116077936	4me3_up:2
Fbf1	1.12692	chr11_116108006_116108256	27ac_up:1
Fbf1	1.12692	chr11_116106636_116106926	27ac_up:2
Fbf1	1.12692	chr11_116108356_116109526	27ac_up:5
Fbf1	1.12692	chr11_116107006_116107416	27ac_up:6
Fbf1	1.12692	chr11_116107616_116107776	27ac_up:1
Hnmt	1.1247	chr2_24385460_24394020	4me3_up:2
Chrnb2	1.11182	chr3_89521398_89523928	27me3_down:3
Chrnb2	1.11182	chr3_89411378_89411778	4me3_up:1
Aldh1a7	1.10723	chr19_20551270_20552180	4me1_up:1;27ac_up:1
Aldh1a7	1.10723	chr19_20552330_20553090	4me1_up:1;27ac_up:1
Aldh1a7	1.10723	chr19_20511530_20517630	4me1_up:2;27ac_up:2
Aldh1a7	1.10723	chr19_20727060_20727440	4me3_up:3;27ac_up:3
Aldh1a7	1.10723	chr19_20722410_20726950	4me3_up:1;27ac_up:2
Aldh1a7	1.10723	chr19_20601410_20606040	4me3_up:3;27ac_up:3
Aldh1a7	1.10723	chr19_20632750_20634340	27ac_up:3
Aldh1a7	1.10723	chr19_21029050_21034930	27ac_up:3
Aldh1a7	1.10723	chr19_20634510_20636040	27ac_up:2
Aldh1a7	1.10723	chr19_20648380_20657310	27ac_up:4
Reep6	1.10134	chr10_80366905_80368505	4me1_up:3;4me3_up:3;27ac_up:3
Reep6	1.10134	chr10_80496185_80504545	27me3_down:3
Reep6	1.10134	chr10_79918915_79919425	27me3_down:1
Reep6	1.10134	chr10_80356665_80357975	27me3_down:1
Reep6	1.10134	chr10_79919545_79920685	27me3_down:1
Reep6	1.10134	chr10_79920825_79921005	27me3_down:1
Reep6	1.10134	chr10_80358085_80358235	27me3_down:1
Reep6	1.10134	chr10_80341935_80342055	4me3_up:1;27ac_up:1
Reep6	1.10134	chr10_80070045_80072355	4me3_up:7
Reep6	1.10134	chr10_80323945_80324925	4me3_up:10
Reep6	1.10134	chr10_80343015_80343595	4me3_up:8;27ac_up:8
Reep6	1.10134	chr10_79880585_79881925	4me3_up:1
Reep6	1.10134	chr10_79876895_79878945	4me3_up:1
Reep6	1.10134	chr10_80173165_80174205	4me3_up:6
Reep6	1.10134	chr10_80072515_80082605	4me3_up:6
Reep6	1.10134	chr10_80341455_80341585	4me3_up:1;27ac_up:1
Reep6	1.10134	chr10_80325405_80325575	4me3_up:1
Reep6	1.10134	chr10_80325665_80325765	4me3_up:1
Reep6	1.10134	chr10_80343725_80344825	4me3_up:3;27ac_up:2
Reep6	1.10134	chr10_80342215_80342305	4me3_up:1;27ac_up:1
Reep6	1.10134	chr10_80325135_80325225	4me3_up:1
Reep6	1.10134	chr10_80341655_80341735	4me3_up:1;27ac_up:1
Reep6	1.10134	chr10_80058545_80058635	27ac_up:1
Reep6	1.10134	chr10_80058895_80059935	27ac_up:5
Reep6	1.10134	chr10_80584055_80584135	27ac_up:1
Reep6	1.10134	chr10_80056435_80057005	27ac_up:2
Reep6	1.10134	chr10_80058145_80058245	27ac_up:1
Reep6	1.10134	chr10_80058325_80058415	27ac_up:1
Reep6	1.10134	chr10_80584315_80585605	27ac_up:3
Reep6	1.10134	chr10_80057855_80057955	27ac_up:1
Reep6	1.10134	chr10_80585795_80586505	27ac_up:1
Reep6	1.10134	chr10_80058725_80058795	27ac_up:1
Cyp4v3	1.10132	chr8_45328216_45332756	4me3_up:3;27ac_up:3
Cyp4v3	1.10132	chr8_45593596_45605946	27ac_up:2
Cyp4v3	1.10132	chr8_45326866_45327366	27ac_up:1
Cyp4v3	1.10132	chr8_45304826_45305796	27ac_up:2
Cyp4v3	1.10132	chr8_45322866_45323246	27ac_up:1
Pdilt	1.10095	chr7_119641376_119642876	4me1_up:1
Pdilt	1.10095	chr7_119526436_119528416	27ac_up:2
Pdilt	1.10095	chr7_119521126_119523246	27ac_up:1
Pdilt	1.10095	chr7_119489776_119491116	27ac_up:1
Pdilt	1.10095	chr7_119561806_119562236	27ac_up:1
Pdilt	1.10095	chr7_119559726_119561706	27ac_up:1
Tmem19	1.09821	chr10_115359764_115361804	4me3_up:14;27ac_up:14
Tmem19	1.09821	chr10_115355004_115355354	27ac_up:1
Tmem19	1.09821	chr10_115357914_115359644	27ac_up:3
Tmem19	1.09821	chr10_115325954_115335994	27ac_up:1
P4ha2	1.09288	chr11_53885168_53891138	4me3_up:19
Lrp11	1.09188	chr10_7840142_7853182	4me3_up:7
Fam131c	1.07373	chr4_141548595_141550515	4me1_up:1
Fam131c	1.07373	chr4_141562965_141574335	4me1_up:1;4me3_up:1;27ac_up:1
Fam131c	1.07373	chr4_141425985_141429025	27me3_down:8;27ac_up:7
Fam131c	1.07373	chr4_141422625_141423875	27me3_down:1
Fam131c	1.07373	chr4_141276085_141291215	4me3_up:17
Fam131c	1.07373	chr4_141306575_141308395	4me3_up:2
Fam131c	1.07373	chr4_141309075_141316585	4me3_up:7
Fam131c	1.07373	chr4_141622505_141623275	4me3_up:2
Fam131c	1.07373	chr4_141642085_141642405	4me3_up:1
Fam131c	1.07373	chr4_141621505_141622195	4me3_up:1
Fam131c	1.07373	chr4_141599915_141605915	4me3_up:2;27ac_up:3
Fam131c	1.07373	chr4_141210125_141211475	4me3_up:1
Fam131c	1.07373	chr4_141641495_141641985	4me3_up:1
Fam131c	1.07373	chr4_141622355_141622435	4me3_up:1
Fam131c	1.07373	chr4_141329375_141343125	27ac_up:7
Fam131c	1.07373	chr4_141258885_141261685	27ac_up:6
Fam131c	1.07373	chr4_141558115_141560315	27ac_up:3
Fam131c	1.07373	chr4_141349315_141354505	27ac_up:1
Fam131c	1.07373	chr4_141346745_141349155	27ac_up:3
Zfp445	1.07082	chr9_122845412_122848902	4me1_up:2;27ac_up:2
Zfp445	1.07082	chr9_122886652_122887632	27ac_up:1
Creld2	1.06918	chr15_89146830_89149390	27me3_down:5
Creld2	1.06918	chr15_89145440_89145800	27me3_down:1
Creld2	1.06918	chr15_89146050_89146130	27me3_down:1
Creld2	1.06918	chr15_89060290_89067550	27me3_down:6
Creld2	1.06918	chr15_89146520_89146700	27me3_down:1
Creld2	1.06918	chr15_89146160_89146270	27me3_down:1
Creld2	1.06918	chr15_89146380_89146470	27me3_down:1
Creld2	1.06918	chr15_89145910_89146000	27me3_down:1
Creld2	1.06918	chr15_89139480_89141910	27me3_down:1
Creld2	1.06918	chr15_88834630_88852190	4me3_up:59
Creld2	1.06918	chr15_88863540_88864310	4me3_up:5
Creld2	1.06918	chr15_88886370_88895810	4me3_up:13;27ac_up:1
Creld2	1.06918	chr15_88865720_88872490	4me3_up:6
Creld2	1.06918	chr15_89475359_89475499	4me3_up:1;27ac_up:1
Creld2	1.06918	chr15_88864490_88864570	4me3_up:1
Creld2	1.06918	chr15_88899950_88909630	27ac_up:4
Creld2	1.06918	chr15_88941810_88945550	27ac_up:1
Mn1	1.06715	chr5_111742280_111743740	27me3_down:1
Mn1	1.06715	chr5_111508230_111515290	4me3_up:3;27ac_up:3
Mn1	1.06715	chr5_111421160_111427140	27ac_up:8
Mn1	1.06715	chr5_111465370_111466930	27ac_up:4
Mn1	1.06715	chr5_111470860_111474550	27ac_up:4
Mn1	1.06715	chr5_111495280_111497580	27ac_up:1
Mn1	1.06715	chr5_111498920_111508220	27ac_up:2
Mn1	1.06715	chr5_111475380_111477000	27ac_up:3
Hsp90aa1	1.06463	chr12_110448030_110451280	4me3_up:4
Hsp90aa1	1.06463	chr12_110447380_110447970	4me3_up:3
Megf8	1.0604	chr7_25311471_25314691	27me3_down:7;27ac_up:7
Megf8	1.0604	chr7_25368101_25368361	27me3_down:1
Megf8	1.0604	chr7_25307711_25307811	27me3_down:1
Megf8	1.0604	chr7_25306281_25307081	27me3_down:4
Megf8	1.0604	chr7_25178281_25180351	27me3_down:2
Megf8	1.0604	chr7_24953601_24955871	27me3_down:1
Megf8	1.0604	chr7_25183381_25185531	27me3_down:1
Megf8	1.0604	chr7_25368471_25368911	27me3_down:2
Megf8	1.0604	chr7_25365911_25366811	27me3_down:2
Megf8	1.0604	chr7_25307901_25308001	27me3_down:1
Megf8	1.0604	chr7_25307351_25307441	27me3_down:1
Megf8	1.0604	chr7_25369101_25369661	27me3_down:1
Megf8	1.0604	chr7_25314901_25315391	27me3_down:3;27ac_up:3
Megf8	1.0604	chr7_25307531_25307611	27me3_down:1
Megf8	1.0604	chr7_25308071_25308181	27me3_down:1
Megf8	1.0604	chr7_25307161_25307271	27me3_down:1
Megf8	1.0604	chr7_25388651_25390061	4me3_up:9
Megf8	1.0604	chr7_25385731_25388111	4me3_up:10
Megf8	1.0604	chr7_25448381_25453781	4me3_up:4
Megf8	1.0604	chr7_25385321_25385431	4me3_up:1
Megf8	1.0604	chr7_25317691_25325401	27ac_up:21
Megf8	1.0604	chr7_24845251_24847741	27ac_up:1
Tlr5	1.05834	chr1_182965569_182969009	4me1_up:1
Tlr5	1.05834	chr1_182954879_182958959	4me3_up:3;27ac_up:5
Tlr5	1.05834	chr1_182959209_182960379	4me3_up:1;27ac_up:1
Clu	1.05489	chr14_65738503_65740283	4me1_up:1;27ac_up:1
Clu	1.05489	chr14_65710443_65729583	4me1_up:4;4me3_up:2;27ac_up:9
Clu	1.05489	chr14_65786393_65794683	4me1_up:2;27ac_up:2
Clu	1.05489	chr14_65971843_65972983	4me1_up:2;4me3_up:2
Clu	1.05489	chr14_65742173_65743133	4me1_up:2;27ac_up:2
Clu	1.05489	chr14_65670673_65689763	4me1_up:3;27ac_up:1
Clu	1.05489	chr14_65973473_65974143	4me1_up:1;4me3_up:1
Clu	1.05489	chr14_65968683_65971723	4me1_up:1;4me3_up:5
Clu	1.05489	chr14_65780183_65784663	4me1_up:1;27ac_up:1
Clu	1.05489	chr14_65773343_65773823	4me1_up:1;27ac_up:1
Clu	1.05489	chr14_65740383_65742123	4me1_up:1;27ac_up:1
Clu	1.05489	chr14_65949603_65953493	27me3_down:5;27ac_up:5
Clu	1.05489	chr14_66116793_66124253	4me3_up:7
Clu	1.05489	chr14_66254323_66280873	4me3_up:3;27ac_up:3
Clu	1.05489	chr14_66110653_66112183	4me3_up:3
Necab1	1.05126	chr4_15146253_15148813	4me3_up:2;27ac_up:2
Paqr7	1.0471	chr4_134252255_134254025	27me3_down:5
Paqr7	1.0471	chr4_134344215_134345895	27me3_down:3
Paqr7	1.0471	chr4_134343335_134344005	27me3_down:2
Paqr7	1.0471	chr4_134497245_134499935	4me3_up:31
Paqr7	1.0471	chr4_134548075_134549485	4me3_up:8
Paqr7	1.0471	chr4_134362715_134363075	4me3_up:2
Paqr7	1.0471	chr4_134236315_134238255	4me3_up:6
Paqr7	1.0471	chr4_134759055_134767815	4me3_up:13
Paqr7	1.0471	chr4_134545685_134547945	4me3_up:6
Tmem120b	1.04118	chr5_123092211_123098171	4me1_up:5
Tmem120b	1.04118	chr5_123131951_123132231	4me3_up:6
Tmem120b	1.04118	chr5_123124311_123131861	4me3_up:9
Tmem120b	1.04118	chr5_123037851_123041081	4me3_up:24
Tmem120b	1.04118	chr5_123192681_123199601	4me3_up:5
Tmem120b	1.04118	chr5_123254121_123258841	4me3_up:4
Tmem120b	1.04118	chr5_122767591_122780171	4me3_up:1;27ac_up:2
Tmem120b	1.04118	chr5_122695521_122697541	27ac_up:3
Tmem120b	1.04118	chr5_122707781_122711871	27ac_up:6
Akr1c19	1.04089	chr13_4233654_4236084	27ac_up:3
Sox9	1.03156	chr11_112938046_112938376	4me1_up:1;27ac_up:1
Sox9	1.03156	chr11_113076166_113076886	4me1_up:1;27ac_up:1
Sox9	1.03156	chr11_112971886_112980086	27me3_down:11
Sox9	1.03156	chr11_113136766_113150686	4me3_up:10;27ac_up:11
Sox9	1.03156	chr11_112787756_112789546	4me3_up:9;27ac_up:9
Sox9	1.03156	chr11_113131306_113136016	4me3_up:4;27ac_up:4
Sox9	1.03156	chr11_113098886_113109886	4me3_up:3;27ac_up:3
Sox9	1.03156	chr11_112784056_112784666	27ac_up:3
Sox9	1.03156	chr11_112783006_112783806	27ac_up:5
Sox9	1.03156	chr11_113055486_113066286	27ac_up:5
Tmc7	1.02501	chr7_118712446_118714096	4me3_up:4
Tmc7	1.02501	chr7_118797046_118800436	27ac_up:2
Ero1lb	1.02243	chr13_12459313_12461233	27ac_up:23
Ero1lb	1.02243	chr13_12454943_12456343	27ac_up:3
Ero1lb	1.02243	chr13_12453403_12454733	27ac_up:2
Ero1lb	1.02243	chr13_12633153_12649913	27ac_up:1
Ero1lb	1.02243	chr13_12452773_12453253	27ac_up:1
Ankrd33b	1.02169	chr15_31568935_31574485	4me3_up:3
Ankrd33b	1.02169	chr15_31334795_31347455	4me3_up:3
Comt	1.01803	chr16_18582447_18582717	27me3_down:1
Comt	1.01803	chr16_18586967_18587977	27me3_down:7
Comt	1.01803	chr16_18589687_18590627	27me3_down:1
Comt	1.01803	chr16_18585127_18586527	27me3_down:4
Comt	1.01803	chr16_18579307_18581697	27me3_down:5
Comt	1.01803	chr16_17833567_17834347	27me3_down:1
Comt	1.01803	chr16_18588097_18589237	27me3_down:4
Comt	1.01803	chr16_17837467_17837827	27me3_down:1
Comt	1.01803	chr16_18582817_18582897	27me3_down:1
Comt	1.01803	chr16_18413487_18424297	4me3_up:24
Comt	1.01803	chr16_18410807_18411117	4me3_up:4
Comt	1.01803	chr16_18411957_18413257	4me3_up:6
Comt	1.01803	chr16_18411317_18411687	4me3_up:2
Agap2	1.01179	chr10_127529414_127534374	27me3_down:1
Agap2	1.01179	chr10_127325624_127325834	4me3_up:1
Agap2	1.01179	chr10_127322884_127323724	4me3_up:2
Agap2	1.01179	chr10_127325194_127325514	4me3_up:1
Agap2	1.01179	chr10_127324784_127325114	4me3_up:1
Agap2	1.01179	chr10_127093164_127094254	27ac_up:2
Agap2	1.01179	chr10_127100274_127102814	27ac_up:6
Agap2	1.01179	chr10_127096364_127096624	27ac_up:1
Agap2	1.01179	chr10_127099704_127099884	27ac_up:1
Agap2	1.01179	chr10_127097074_127097924	27ac_up:1
Agap2	1.01179	chr10_127099984_127100084	27ac_up:1
Agap2	1.01179	chr10_127099454_127099604	27ac_up:1
Agap2	1.01179	chr10_127098914_127099394	27ac_up:1
Agap2	1.01179	chr10_127096734_127096914	27ac_up:1
Hspb8	1.00538	chr5_116585021_116591331	27me3_down:3
Fam53b	1.00419	chr7_132771627_132779127	4me3_up:4
Fam53b	1.00419	chr7_132666297_132668847	27ac_up:1
Cdhr5	0.999307	chr7_141093111_141093191	4me3_up:1
Cdhr5	0.999307	chr7_141337151_141338581	4me3_up:5
Cdhr5	0.999307	chr7_141078431_141079761	4me3_up:3
Cdhr5	0.999307	chr7_141080101_141081901	4me3_up:4
Cdhr5	0.999307	chr7_141341971_141342051	4me3_up:1
Cdhr5	0.999307	chr7_141339051_141341891	4me3_up:7
Cdhr5	0.999307	chr7_141088401_141088471	4me3_up:1
Cdhr5	0.999307	chr7_141093321_141093721	4me3_up:1
Cdhr5	0.999307	chr7_141092721_141092971	4me3_up:1
Cdhr5	0.999307	chr7_141088921_141089241	4me3_up:1
Cdhr5	0.999307	chr7_141087801_141088281	4me3_up:2
Cdhr5	0.999307	chr7_140922191_140922401	27ac_up:1
Cdhr5	0.999307	chr7_140921081_140921631	27ac_up:2
Cdhr5	0.999307	chr7_140921911_140922151	27ac_up:1
Tspyl4	0.996482	chr10_34126564_34127384	27ac_up:8
Tspyl4	0.996482	chr10_34093414_34095894	27ac_up:2
Gjb2	0.991295	chr14_57525593_57532253	27me3_down:1
Gjb2	0.991295	chr14_57524913_57525303	27me3_down:1
Gjb2	0.991295	chr14_57100763_57104463	4me3_up:5
Gjb2	0.991295	chr14_57374363_57378483	4me3_up:3;27ac_up:3
Gjb2	0.991295	chr14_57088163_57090763	4me3_up:2
P2ry1	0.988563	chr3_60940848_60941818	4me1_up:1;27ac_up:1
P2ry1	0.988563	chr3_61004598_61005748	27ac_up:2
Fam25c	0.985507	chr14_34302004_34305004	4me3_up:4
Fam25c	0.985507	chr14_34295774_34301514	4me3_up:6
Fam25c	0.985507	chr14_34569724_34571194	4me3_up:1
Fam25c	0.985507	chr14_34632494_34637494	4me3_up:1
Fam25c	0.985507	chr14_34567564_34569704	4me3_up:1
Fam25c	0.985507	chr14_34345654_34353694	27ac_up:8
Fam25c	0.985507	chr14_34582614_34588374	27ac_up:4
Fam25c	0.985507	chr14_34353754_34355284	27ac_up:2
Acox1	0.985501	chr11_116205766_116214836	4me1_up:2;4me3_up:6;27ac_up:2
Acox1	0.985501	chr11_115616646_115617516	4me1_up:1
Acox1	0.985501	chr11_116281846_116282906	27me3_down:4
Acox1	0.985501	chr11_116532086_116532436	27me3_down:1
Acox1	0.985501	chr11_116535166_116535246	27me3_down:1
Acox1	0.985501	chr11_116534996_116535076	27me3_down:1
Acox1	0.985501	chr11_116535366_116535606	27me3_down:1
Acox1	0.985501	chr11_116532686_116533236	27me3_down:1
Acox1	0.985501	chr11_116533366_116533966	27me3_down:1
Acox1	0.985501	chr11_116189566_116198216	4me3_up:20
Acox1	0.985501	chr11_116198376_116198586	4me3_up:5
Acox1	0.985501	chr11_116077656_116077936	4me3_up:2
Acox1	0.985501	chr11_116393966_116396186	4me3_up:7
Acox1	0.985501	chr11_116183616_116189406	4me3_up:5
Acox1	0.985501	chr11_116478376_116484036	4me3_up:2
Acox1	0.985501	chr11_116076546_116076746	4me3_up:1
Acox1	0.985501	chr11_116076326_116076436	4me3_up:1
Acox1	0.985501	chr11_116076786_116077446	4me3_up:7
Acox1	0.985501	chr11_116108006_116108256	27ac_up:1
Acox1	0.985501	chr11_116106636_116106926	27ac_up:2
Acox1	0.985501	chr11_116108356_116109526	27ac_up:5
Acox1	0.985501	chr11_116107006_116107416	27ac_up:6
Acox1	0.985501	chr11_116107616_116107776	27ac_up:1
Saa4	0.98061	chr7_46741390_46742430	27ac_up:1
Chrna2	0.979116	chr14_65968683_65971723	4me1_up:1;4me3_up:2
Chrna2	0.979116	chr14_65971843_65972983	4me1_up:1;4me3_up:1
Chrna2	0.979116	chr14_66116793_66124253	4me3_up:6
Chrna2	0.979116	chr14_66254323_66280873	4me3_up:4;27ac_up:4
Chrna2	0.979116	chr14_66110653_66112183	4me3_up:2
Daglb	0.97696	chr5_143286141_143290201	27me3_down:6
H2-Aa	0.976555	chr17_34398515_34400425	4me3_up:1;27ac_up:1
H2-Aa	0.976555	chr17_34391805_34392645	4me3_up:1
H2-Aa	0.976555	chr17_34306045_34310555	4me3_up:1
H2-Aa	0.976555	chr17_34189555_34191325	27ac_up:1
Cyp8b1	0.972766	chr9_121630212_121641482	27me3_down:1
Cyp8b1	0.972766	chr9_121642922_121653792	27me3_down:1
Cyp8b1	0.972766	chr9_121951242_121964732	4me3_up:4;27ac_up:5
Cyp8b1	0.972766	chr9_121918892_121919882	27ac_up:1
Cyp8b1	0.972766	chr9_121881352_121882622	27ac_up:3
Cyp8b1	0.972766	chr9_121995112_121996112	27ac_up:4
Cyp8b1	0.972766	chr9_121920102_121920552	27ac_up:1
Acot1	0.972505	chr12_84022860_84023820	4me1_up:2
Acot1	0.972505	chr12_84273270_84274170	4me1_up:1
Cth	0.970513	chr3_158061346_158062586	27ac_up:1
Abcc3	0.969279	chr11_94466226_94473366	27me3_down:14
Abcc3	0.969279	chr11_94411616_94415736	27me3_down:6
Abcc3	0.969279	chr11_94474296_94474966	27me3_down:1
Abcc3	0.969279	chr11_94382486_94392866	4me3_up:10;27ac_up:24
Abcc3	0.969279	chr11_94587966_94601636	4me3_up:10
Abcc3	0.969279	chr11_94132506_94140216	4me3_up:2
Abcc3	0.969279	chr11_94156026_94185166	4me3_up:3
Abcc3	0.969279	chr11_94543346_94543546	4me3_up:1;27ac_up:1
Abcc3	0.969279	chr11_94346136_94348516	27ac_up:7
Abcc3	0.969279	chr11_94273656_94275056	27ac_up:2
Abcc3	0.969279	chr11_94343766_94345946	27ac_up:8
Abcc3	0.969279	chr11_94341846_94343286	27ac_up:4
Abcc3	0.969279	chr11_94272956_94273376	27ac_up:1
Abcc3	0.969279	chr11_94542976_94543286	27ac_up:1
Abcc3	0.969279	chr11_94348956_94350926	27ac_up:1
Hes6	0.968553	chr1_91309903_91315483	4me1_up:8;27ac_up:8
Hes6	0.968553	chr1_90914743_90921843	27me3_down:1;4me3_up:1
Hes6	0.968553	chr1_91421553_91423683	27ac_up:1
Hes6	0.968553	chr1_91322423_91323473	27ac_up:3
Hes6	0.968553	chr1_91802143_91804903	27ac_up:1
Bag3	0.968012	chr7_128611686_128616906	4me3_up:3
Pla2g6	0.967388	chr15_79251480_79251870	27me3_down:5
Pla2g6	0.967388	chr15_79258650_79258800	27me3_down:1
Pla2g6	0.967388	chr15_79259770_79261070	27me3_down:3
Pla2g6	0.967388	chr15_79264150_79267360	27me3_down:1
Pla2g6	0.967388	chr15_79497690_79505190	27me3_down:8
Pla2g6	0.967388	chr15_79516640_79521710	27me3_down:11
Pla2g6	0.967388	chr15_79261540_79261810	27me3_down:1
Pla2g6	0.967388	chr15_79252640_79252850	27me3_down:1
Pla2g6	0.967388	chr15_79259390_79259650	27me3_down:1
Pla2g6	0.967388	chr15_79258840_79259180	27me3_down:1
Pla2g6	0.967388	chr15_79261280_79261400	27me3_down:1
Pla2g6	0.967388	chr15_79206620_79209950	4me3_up:8
Pla2g6	0.967388	chr15_79318950_79327630	4me3_up:18
Pla2g6	0.967388	chr15_79452050_79457370	4me3_up:10
Pla2g6	0.967388	chr15_79210240_79215000	4me3_up:1
Pla2g6	0.967388	chr15_79366670_79369660	27ac_up:11
Pla2g6	0.967388	chr15_79369740_79369890	27ac_up:2
Pla2g6	0.967388	chr15_79365950_79366580	27ac_up:1
Pla2g6	0.967388	chr15_79369980_79373080	27ac_up:10
Rusc1	0.963351	chr3_89317678_89322698	27me3_down:15
Rusc1	0.963351	chr3_89521398_89523928	27me3_down:1
Rusc1	0.963351	chr3_89409158_89411148	4me3_up:7
Rusc1	0.963351	chr3_89411378_89411778	4me3_up:1
Rusc1	0.963351	chr3_88769888_88772648	4me3_up:7;27ac_up:7
Rusc1	0.963351	chr3_89229168_89229908	4me3_up:6;27ac_up:6
Rusc1	0.963351	chr3_89238698_89238888	4me3_up:1
Rusc1	0.963351	chr3_89237918_89238658	4me3_up:1
Rusc1	0.963351	chr3_89239018_89239268	4me3_up:1
Rusc1	0.963351	chr3_89226438_89226518	27ac_up:1
Ddhd2	0.953926	chr8_25532428_25548668	4me1_up:15;4me3_up:16;27ac_up:16
Ddhd2	0.953926	chr8_25519428_25532248	4me1_up:2;27ac_up:2
Ddhd2	0.953926	chr8_25768408_25770548	27ac_up:2
Ddhd2	0.953926	chr8_25770668_25771078	27ac_up:2
Ddhd2	0.953926	chr8_25771328_25777418	27ac_up:3
Ddhd2	0.953926	chr8_25749838_25750698	27ac_up:2
Ddhd2	0.953926	chr8_25750788_25752098	27ac_up:1
Gna12	0.951876	chr5_140785606_140804996	4me3_up:12;27ac_up:29
Gna12	0.951876	chr5_140734596_140739006	4me3_up:15
Gna12	0.951876	chr5_140808706_140829986	4me3_up:21;27ac_up:39
Mbd1	0.949914	chr18_74383146_74390546	4me1_up:2
Mbd1	0.949914	chr18_74060606_74064916	27me3_down:10;27ac_up:10
Mbd1	0.949914	chr18_74269536_74271886	4me3_up:5
Mbd1	0.949914	chr18_74269066_74269396	4me3_up:2
Mbd1	0.949914	chr18_74294246_74295296	27ac_up:6
Mbd1	0.949914	chr18_74292836_74293556	27ac_up:1
Lpgat1	0.947993	chr1_191784251_191787991	4me1_up:1
Lpgat1	0.947993	chr1_191619901_191621161	4me1_up:2
Lpgat1	0.947993	chr1_191921491_191922601	4me1_up:1;27ac_up:1
Lpgat1	0.947993	chr1_191754191_191754751	4me1_up:1
Lpgat1	0.947993	chr1_191410321_191440981	4me3_up:6
Lpgat1	0.947993	chr1_191488881_191501291	4me3_up:12
Lpgat1	0.947993	chr1_191692021_191694721	4me3_up:3
Lpgat1	0.947993	chr1_191588761_191593761	27ac_up:2
Lpgat1	0.947993	chr1_191623681_191630341	27ac_up:7
Lpgat1	0.947993	chr1_191631851_191634871	27ac_up:3
Onecut1	0.945451	chr9_74896513_74897433	4me3_up:1
Onecut1	0.945451	chr9_74957203_74976103	27ac_up:2
Onecut1	0.945451	chr9_74976273_75004263	27ac_up:2
Plscr2	0.943834	chr9_92276012_92280542	4me3_up:10
Plscr2	0.943834	chr9_92372562_92379982	4me3_up:4
Plscr2	0.943834	chr9_92223982_92233142	4me3_up:1;27ac_up:1
Plscr2	0.943834	chr9_92382472_92387302	27ac_up:4
Invs	0.942811	chr4_48540268_48540498	4me1_up:2
Invs	0.942811	chr4_48539988_48540078	4me1_up:1
Invs	0.942811	chr4_48540568_48551068	4me1_up:8
Invs	0.942811	chr4_48331778_48333508	4me3_up:1
Tlr12	0.937825	chr4_128712356_128722906	4me3_up:10
Tlr12	0.937825	chr4_128709656_128711056	4me3_up:2
Tlr12	0.937825	chr4_128948956_128954376	27ac_up:2
Tlr12	0.937825	chr4_128946166_128947456	27ac_up:1
Serping1	0.937113	chr2_84773643_84774733	4me1_up:2;4me3_up:10
Serping1	0.937113	chr2_84769923_84770463	4me1_up:1
Serping1	0.937113	chr2_84872693_84874593	27me3_down:7
Serping1	0.937113	chr2_84871243_84871943	27me3_down:4
Serping1	0.937113	chr2_84850183_84852663	4me3_up:12
Serping1	0.937113	chr2_84850003_84850113	4me3_up:1
Serping1	0.937113	chr2_84726153_84727153	4me3_up:15
Serping1	0.937113	chr2_84774813_84775353	4me3_up:4
Serping1	0.937113	chr2_84724213_84725523	4me3_up:3
Plin2	0.936623	chr4_86668696_86669936	4me3_up:18
Plin2	0.936623	chr4_86680996_86692326	4me3_up:7
Plin2	0.936623	chr4_86664506_86668366	4me3_up:8
Plin2	0.936623	chr4_86668556_86668646	4me3_up:1
Alpl	0.933146	chr4_137901365_137905065	4me1_up:4;27ac_up:4
Alpl	0.933146	chr4_137766475_137792485	4me3_up:10
Alpl	0.933146	chr4_137725655_137726945	4me3_up:1;27ac_up:1
Alpl	0.933146	chr4_138060605_138071875	4me3_up:5
Alpl	0.933146	chr4_137468915_137501055	4me3_up:2
Alpl	0.933146	chr4_138515765_138517845	27ac_up:1
Grina	0.930743	chr15_76519670_76521590	27me3_down:5
Grina	0.930743	chr15_75997930_75998050	27me3_down:2
Grina	0.930743	chr15_75995950_75996040	27me3_down:1
Grina	0.930743	chr15_75996510_75997110	27me3_down:1
Grina	0.930743	chr15_75999150_76001090	27me3_down:3
Grina	0.930743	chr15_75997700_75997820	27me3_down:1
Grina	0.930743	chr15_75997160_75997560	27me3_down:1
Grina	0.930743	chr15_75998470_75998540	27me3_down:1
Grina	0.930743	chr15_75995320_75995820	27me3_down:1;27ac_up:1
Grina	0.930743	chr15_75998670_75998770	27me3_down:1
Grina	0.930743	chr15_75998260_75998370	27me3_down:1
Grina	0.930743	chr15_75744050_75746840	27me3_down:1
Grina	0.930743	chr15_75996200_75996370	27me3_down:1
Grina	0.930743	chr15_76194810_76195420	4me3_up:8
Grina	0.930743	chr15_76200600_76203500	4me3_up:10
Grina	0.930743	chr15_76306690_76307220	4me3_up:7;27ac_up:7
Grina	0.930743	chr15_75995100_75995230	4me3_up:2;27ac_up:2
Grina	0.930743	chr15_76112770_76119100	4me3_up:17
Grina	0.930743	chr15_76199830_76200460	4me3_up:5
Grina	0.930743	chr15_76576490_76580600	4me3_up:4
Grina	0.930743	chr15_76195710_76197970	4me3_up:9
Grina	0.930743	chr15_76305760_76306190	4me3_up:2;27ac_up:2
Grina	0.930743	chr15_76305050_76305130	4me3_up:1;27ac_up:1
Grina	0.930743	chr15_76194000_76194340	4me3_up:2
Grina	0.930743	chr15_76193480_76193960	4me3_up:2
Grina	0.930743	chr15_76199400_76199540	4me3_up:1
Grina	0.930743	chr15_75992760_75995070	4me3_up:3;27ac_up:3
Grina	0.930743	chr15_76120190_76120250	4me3_up:1
Grina	0.930743	chr15_76194570_76194750	4me3_up:1
Grina	0.930743	chr15_76194430_76194550	4me3_up:1
Grina	0.930743	chr15_76305570_76305660	4me3_up:1;27ac_up:1
Grina	0.930743	chr15_76306390_76306470	4me3_up:1;27ac_up:1
Grina	0.930743	chr15_76293540_76295890	27ac_up:6
Grina	0.930743	chr15_76295980_76296070	27ac_up:1
Grina	0.930743	chr15_76263490_76264880	27ac_up:1
Grina	0.930743	chr15_76296140_76296220	27ac_up:1
Grina	0.930743	chr15_76267500_76268080	27ac_up:1
Mvp	0.928917	chr7_126848026_126848406	27me3_down:2
Mvp	0.928917	chr7_126848856_126849216	27me3_down:1
Mvp	0.928917	chr7_126849766_126850926	27me3_down:1
Mvp	0.928917	chr7_127090786_127091276	4me3_up:1
Mvp	0.928917	chr7_127215966_127216686	4me3_up:3
Mvp	0.928917	chr7_127297716_127299526	4me3_up:5
Mvp	0.928917	chr7_127091466_127092166	4me3_up:8
Mvp	0.928917	chr7_127296516_127297616	4me3_up:3
Mvp	0.928917	chr7_126703166_126703966	4me3_up:1
Mvp	0.928917	chr7_126700466_126700576	4me3_up:1
Mvp	0.928917	chr7_126701916_126701996	4me3_up:1
Mvp	0.928917	chr7_126700636_126700736	4me3_up:1
Mvp	0.928917	chr7_126702126_126702966	4me3_up:1
Mvp	0.928917	chr7_126704216_126705186	4me3_up:1
Acaa1b	0.927007	chr9_119242782_119244652	4me1_up:2
Acaa1b	0.927007	chr9_119354782_119355082	4me1_up:1
Acaa1b	0.927007	chr9_118934802_118936512	4me3_up:1
Acaa1b	0.927007	chr9_119368192_119368732	27ac_up:1
Acaa1b	0.927007	chr9_119330232_119331002	27ac_up:1
Acaa1b	0.927007	chr9_119402592_119411462	27ac_up:1
Cpsf4l	0.92418	chr11_113708016_113709816	4me3_up:3
Cpsf4l	0.92418	chr11_113721686_113726846	4me3_up:3
Cpsf4l	0.92418	chr11_113619616_113624166	27ac_up:9
Ttc7b	0.923903	chr12_100473940_100479910	4me1_up:3
Ttc7b	0.923903	chr12_99966280_99968540	27me3_down:2
Ttc7b	0.923903	chr12_99964850_99965200	27me3_down:1
Ttc7b	0.923903	chr12_100779310_100783670	4me3_up:13
Ttc7b	0.923903	chr12_100625400_100637360	4me3_up:6
Ttc7b	0.923903	chr12_100835330_100838490	4me3_up:4
Ttc7b	0.923903	chr12_100788590_100797190	27ac_up:2
Cpeb2	0.923891	chr5_43093041_43095331	4me1_up:7;27ac_up:7
Cpeb2	0.923891	chr5_43128881_43140161	27ac_up:1
Socs3	0.917582	chr11_118265236_118267796	4me1_up:1;27ac_up:1
Socs3	0.917582	chr11_117948366_117966086	4me3_up:92;27ac_up:66
Socs3	0.917582	chr11_118220156_118248436	4me3_up:4
Socs3	0.917582	chr11_117828166_117832336	4me3_up:3
Socs3	0.917582	chr11_118320206_118332356	27ac_up:2
Socs3	0.917582	chr11_117927726_117943126	27ac_up:22
Socs3	0.917582	chr11_117883526_117896516	27ac_up:5
Socs3	0.917582	chr11_117913856_117915236	27ac_up:1
Lgals8	0.916482	chr13_12459313_12461233	27ac_up:32
Lgals8	0.916482	chr13_12454943_12456343	27ac_up:3
Lgals8	0.916482	chr13_12456423_12458933	27ac_up:2
Lgals8	0.916482	chr13_12453403_12454733	27ac_up:2
Lgals8	0.916482	chr13_12633153_12649913	27ac_up:1
Lgals8	0.916482	chr13_12452773_12453253	27ac_up:1
Enpp3	0.913639	chr10_24831804_24836014	4me3_up:8;27ac_up:9
Dpy19l1	0.909131	chr9_24422356_24422676	4me1_up:1;27ac_up:1
Dpy19l1	0.909131	chr9_24485726_24491656	4me1_up:1
Dpy19l1	0.909131	chr9_24421116_24421666	4me1_up:1;27ac_up:1
Dpy19l1	0.909131	chr9_24421736_24422256	4me1_up:1;27ac_up:1
Dpy19l1	0.909131	chr9_24417426_24420896	4me1_up:2;27ac_up:1
Dpy19l1	0.909131	chr9_24769816_24770676	27me3_down:2
Dpy19l1	0.909131	chr9_24765766_24769646	27me3_down:1
Dpy19l1	0.909131	chr9_24770926_24773716	27me3_down:2
Dpy19l1	0.909131	chr9_24513136_24514956	27ac_up:2
Slc22a4	0.908937	chr11_53885168_53891138	4me3_up:9
[truncated: 14,586 more rows]

## Sheet: SuppTable3f
Supplemental Table 3f: Location of enhancer LAAsP-mods linked to LAAsP genes for Aging '10mo Aged Veh over 5mo Adult Veh' comparison (Figure 4c)
Gene_symbol	Log2 FC	Enhancer anchor coordinates (mm10)	Individual Mark contributions (mark_direction:#enhancers per anchor)
Snora78	2.03723	chr17_24864445_24868685	27ac_up:1
Gm9843	1.97875	chr16_76079655_76080835	27ac_up:1
Gm10076	1.94886	chr14_105602283_105603823	4me3_up:3
Gm10076	1.94886	chr14_105605763_105608183	4me3_up:1
Gm10123	1.84824	chr9_96976401_96992061	4me3_up:8
H3f3a	1.76627	chr16_91228675_91237195	27ac_up:1
Lsm7	1.68601	chr10_80471375_80477065	27ac_up:1
Atp5l	1.68209	chr9_44804657_44805987	4me3_up:1
Atp5l	1.68209	chr9_44803457_44804217	4me3_up:1
Sec61g	1.59568	chr11_16588417_16594457	27ac_up:30
Sec61g	1.59568	chr11_16604867_16613437	27ac_up:5
Rpl9	1.51332	chr5_65449001_65449501	27ac_up:1
Rpl9	1.51332	chr5_65624211_65625031	27ac_up:1
Rpl9	1.51332	chr5_65041931_65048981	27ac_up:2
Rpl27	1.37723	chr11_101339426_101344676	27ac_up:3
Dmrta1	1.37274	chr4_89688939_89691429	4me3_up:4;27ac_up:4
Gm15401	1.3614	chr6_72629346_72631006	4me3_up:1
Gm15401	1.3614	chr6_72627786_72629286	4me3_up:1
Ndufb4	1.35805	chr16_37624374_37626034	27ac_up:2
Ccdc152	1.3394	chr15_3458000_3474400	4me3_up:2
Ccdc152	1.3394	chr15_3642430_3650670	27ac_up:1
Ccdc152	1.3394	chr15_3636100_3637950	27ac_up:1
Ccdc152	1.3394	chr15_3607450_3614850	27ac_up:2
Ccdc152	1.3394	chr15_3617200_3621480	27ac_up:3
Ccdc152	1.3394	chr15_3639820_3641550	27ac_up:1
Rpl17	1.30507	chr18_75117436_75118906	4me3_up:3
Rpl17	1.30507	chr18_75103156_75107346	27ac_up:2;4me1_up:2
Ppp1r3c	1.28765	chr19_36626950_36627750	4me3_up:1
Scarna6	1.24825	chr1_87946705_87948495	27ac_up:2
Gpx4	1.20153	chr10_80127095_80127895	4me3_up:1
Gpx4	1.20153	chr10_80128095_80128385	4me3_up:1
Gpx4	1.20153	chr10_80130105_80130255	4me3_up:1
Gpx4	1.20153	chr10_80129695_80129895	4me3_up:1
Gpx4	1.20153	chr10_80316725_80317235	27ac_up:1
Gpx4	1.20153	chr10_80471375_80477065	27ac_up:1
Oaz1	1.18026	chr10_80471375_80477065	27ac_up:1
Gt(ROSA)26Sor	1.13885	chr6_112835206_112895936	4me1_up:2
Polr2k	1.12927	chr15_35869435_35875555	4me3_up:2
Polr2k	1.12927	chr15_35886535_35887885	4me3_up:1
A330069E16Rik	1.11422	chr2_91120073_91120153	27ac_up:1
A330069E16Rik	1.11422	chr2_91120263_91120343	27ac_up:1
A330069E16Rik	1.11422	chr2_91118213_91119153	27ac_up:1
A330069E16Rik	1.11422	chr2_91120493_91121023	27ac_up:1
A330069E16Rik	1.11422	chr2_91119423_91119973	27ac_up:1
Tomm5	1.11421	chr4_45297068_45299088	27ac_up:13
Snord104	1.1099	chr11_106264116_106264186	27ac_up:1
Snord104	1.1099	chr11_106262876_106263006	27ac_up:1
Snord104	1.1099	chr11_106262686_106262796	27ac_up:1
Rpl41	1.07567	chr10_128337954_128349744	27ac_up:1
Rpl35	1.06087	chr2_38972280_38978830	27ac_up:3
Rpl35	1.06087	chr2_38920360_38926110	4me1_up:1
Rpl35	1.06087	chr2_38914500_38918970	4me1_up:1
Trhde	1.02954	chr10_114791454_114800514	4me3_up:3;27ac_up:3
Rpl19	1.01974	chr11_97562356_97574966	27ac_up:5
Rpl19	1.01974	chr18_24011069_24012259	27ac_up:1
Bloc1s2	1.01426	chr19_44056680_44057690	27ac_up:1
Bloc1s2	1.01426	chr19_44051860_44052960	27ac_up:1
Bloc1s2	1.01426	chr19_44061900_44063010	27ac_up:1
Bloc1s2	1.01426	chr19_44060710_44061840	27ac_up:1
Bloc1s2	1.01426	chr19_44039580_44040740	27ac_up:1
Bloc1s2	1.01426	chr19_44040830_44047630	27ac_up:3
Bloc1s2	1.01426	chr19_44127480_44129190	27ac_up:1
Pfdn5	1.01031	chr15_102082109_102084159	27ac_up:3
Pfdn5	1.01031	chr15_102446779_102446999	27ac_up:1
Pfdn5	1.01031	chr15_102447459_102447969	27ac_up:2
Pfdn5	1.01031	chr15_102445979_102446259	27ac_up:1
Pfdn5	1.01031	chr15_102445519_102445799	27ac_up:1
Pfdn5	1.01031	chr15_102447109_102447229	27ac_up:1
Pfdn5	1.01031	chr15_102446449_102446699	27ac_up:1
BC002163	0.959543	chr16_43322587_43337287	4me3_up:1
BC002163	0.959543	chr16_43171627_43173907	27ac_up:1
BC002163	0.959543	chr16_43285037_43288537	27ac_up:1
BC002163	0.959543	chr16_42946927_42947527	27ac_up:1
Mrpl14	0.952094	chr17_45640811_45642461	27ac_up:2
Hspe1	0.948013	chr1_55172076_55175336	4me3_up:7
Hspe1	0.948013	chr1_55078706_55080096	27ac_up:2
Hspe1	0.948013	chr2_72767663_72770343	27ac_up:1
Hspe1	0.948013	chr1_55081166_55081656	27ac_up:1
Hspe1	0.948013	chr1_55074256_55077826	27ac_up:9
Hspe1	0.948013	chr1_55080346_55081066	27ac_up:1
2410006H16Rik	0.940893	chr11_62429758_62432618	27ac_up:1
4430402I18Rik	0.928492	chr19_29284990_29286300	4me3_up:1
4430402I18Rik	0.928492	chr19_28994070_28995040	27ac_up:2
4430402I18Rik	0.928492	chr19_28995320_28996150	27ac_up:2
Serpina12	0.917178	chr12_104344280_104344640	27ac_up:1
Serpina12	0.917178	chr12_103608910_103609890	27ac_up:1
Serpina12	0.917178	chr12_104343820_104344220	27ac_up:1
Serpina12	0.917178	chr12_104391490_104391840	4me1_up:1
Rps12	0.912004	chr10_23710494_23713534	27ac_up:4
Rps12	0.912004	chr10_24223864_24224514	27ac_up:1
Kbtbd3	0.908309	chr9_4282510_4285940	27ac_up:7
Rpl36	0.899193	chr11_76816498_76828278	4me3_up:4
Rpl36	0.899193	chr17_56570987_56571607	4me3_up:1;27ac_up:1
Acyp1	0.89696	chr12_85303670_85305460	4me3_up:12;27ac_up:12
Acyp1	0.89696	chr12_84943390_84951050	4me3_up:2
Acyp1	0.89696	chr12_84979460_84980510	27ac_up:1
Acyp1	0.89696	chr12_84974230_84979390	27ac_up:1
Rpl34	0.894229	chr3_130649592_130650342	4me1_up:1
Rnf7	0.882316	chr9_96976401_96992061	4me3_up:1
Cdh2	0.865584	chr18_16706091_16718801	27ac_up:7
Rps6	0.861046	chr15_76638600_76638830	27ac_up:1
Rps6	0.861046	chr15_76639770_76639850	27ac_up:1
Rps6	0.861046	chr15_76639590_76639670	27ac_up:1
Commd6	0.852533	chr14_101548483_101550463	27ac_up:3
Irx1	0.835922	chr13_71960282_71963212	27ac_up:12
Psmb5	0.835593	chr14_55082933_55092003	4me3_up:3
Camk1	0.819601	chr6_112835206_112895936	4me1_up:1
Rps19	0.809893	chr4_147415931_147434471	27ac_up:1
Scarna2	0.804425	chr3_107930892_107931312	4me3_up:1
Scarna2	0.804425	chr3_108224432_108226122	27ac_up:3
Scarna2	0.804425	chr3_108226192_108226362	27ac_up:1
4930524O07Rik	0.771229	chr9_106732489_106741719	27ac_up:1
4930524O07Rik	0.771229	chr9_106726149_106728079	27ac_up:1
Plekhj1	0.768546	chr10_80471375_80477065	27ac_up:1
Gm4285	0.755236	chr14_75801313_75809363	4me3_up:4
Dgcr6	0.752483	chr16_18053117_18054917	27ac_up:4
Rpl32	0.748651	chr6_115383742_115439832	4me3_up:3
Rpl32	0.748651	chr6_116227532_116228532	4me3_up:2
Atp6v0b	0.748484	chr4_118146635_118146995	4me3_up:1;27ac_up:1
Atp6v0b	0.748484	chr4_118147195_118148675	4me3_up:2;27ac_up:2
Atp6v0b	0.748484	chr4_118144475_118146075	4me3_up:4;27ac_up:4
Atp6v0b	0.748484	chr4_118148865_118153185	4me3_up:6;27ac_up:9
Atp6v0b	0.748484	chr4_118144075_118144365	4me3_up:1;27ac_up:1
Atp6v0b	0.748484	chr4_118142545_118143895	4me3_up:3;27ac_up:3
Atp6v0b	0.748484	chr4_118146135_118146555	4me3_up:1;27ac_up:1
Atp6v0b	0.748484	chr4_118138985_118142225	27ac_up:3
Olfr1033	0.745567	chr2_86069643_86070393	27ac_up:1
Ptges3	0.733543	chr10_128337954_128349744	27ac_up:1
Avpi1	0.72878	chr19_41812080_41814940	27ac_up:2;4me1_up:2
Hyi	0.725129	chr4_118146635_118146995	4me3_up:1;27ac_up:1
Hyi	0.725129	chr4_118144475_118146075	4me3_up:5;27ac_up:5
Hyi	0.725129	chr4_118147195_118148675	4me3_up:2;27ac_up:2
Hyi	0.725129	chr4_118148865_118153185	4me3_up:4;27ac_up:5
Hyi	0.725129	chr4_118144075_118144365	4me3_up:1;27ac_up:1
Hyi	0.725129	chr4_118146135_118146555	4me3_up:1;27ac_up:1
Hyi	0.725129	chr4_118142545_118143895	4me3_up:2;27ac_up:2
Hyi	0.725129	chr4_118138985_118142225	27ac_up:1
Rps15	0.725047	chr10_80127095_80127895	4me3_up:1
Rps15	0.725047	chr10_80128095_80128385	4me3_up:1
Rps15	0.725047	chr10_80130105_80130255	4me3_up:1
Rps15	0.725047	chr10_80129695_80129895	4me3_up:1
Rps15	0.725047	chr10_80316725_80317235	27ac_up:1
Rps15	0.725047	chr6_57647206_57647606	27ac_up:1
Rps15	0.725047	chr10_80471375_80477065	27ac_up:1
Zfyve21	0.724214	chr12_111275749_111275829	27ac_up:1
Zfyve21	0.724214	chr12_111275489_111275569	27ac_up:1
Zfyve21	0.724214	chr12_111275239_111275339	27ac_up:1
Zfyve21	0.724214	chr12_111275919_111276009	27ac_up:1
Timm13	0.71895	chr10_80471375_80477065	27ac_up:1
Phb	0.718536	chr11_95511526_95514156	27ac_up:4
Pcnp	0.715497	chr16_55816927_55817727	4me3_up:3;27ac_up:3
Pcnp	0.715497	chr16_55819017_55819557	27ac_up:1
Pcnp	0.715497	chr16_55818847_55818987	27ac_up:1
Pcnp	0.715497	chr16_55819697_55821767	27ac_up:1
Pcnp	0.715497	chr16_55818527_55818747	27ac_up:1
Akr1c20	0.711283	chr13_4514914_4515414	4me3_up:1
Cry1	0.704497	chr10_84858595_84860495	4me3_up:6
Ces1d	0.701686	chr8_93261141_93262111	4me3_up:2;27ac_up:2
Ces1d	0.701686	chr8_93227701_93229361	4me3_up:5;27ac_up:5
Ces1d	0.701686	chr8_93189371_93192751	4me3_up:1
Ces1d	0.701686	chr8_93195081_93197661	4me3_up:6
Ces1d	0.701686	chr8_93276101_93279971	4me3_up:4;27ac_up:4
Ces1d	0.701686	chr8_93192901_93194871	4me3_up:1
Ces1d	0.701686	chr8_93263391_93264051	4me3_up:1;27ac_up:1
Ces1d	0.701686	chr8_93478320_93479000	27ac_up:1
Ces1d	0.701686	chr8_93216101_93217491	27ac_up:2
Ces1d	0.701686	chr8_93252561_93253151	27ac_up:1
Ces1d	0.701686	chr8_93221731_93222731	27ac_up:1
Ces1d	0.701686	chr8_93217651_93219101	27ac_up:1
Ccdc122	0.698576	chr14_76833013_76835343	4me3_up:1
Ccdc122	0.698576	chr14_76836383_76838133	4me3_up:1
Nit2	0.696414	chr16_57415507_57436187	4me3_up:9
Nit2	0.696414	chr16_57317977_57321057	4me3_up:5
Nit2	0.696414	chr16_57452227_57457037	4me3_up:4
Nit2	0.696414	chr16_57399727_57404777	4me3_up:6
Nit2	0.696414	chr16_57334817_57341257	4me3_up:12
Nit2	0.696414	chr16_57353457_57356307	4me3_up:2
Nit2	0.696414	chr16_57352277_57353267	4me3_up:1
Nit2	0.696414	chr16_57325767_57331157	4me3_up:4
Nit2	0.696414	chr16_57479807_57486987	4me3_up:3
Nit2	0.696414	chr16_57349117_57349367	4me3_up:1
Nit2	0.696414	chr16_57468137_57474737	4me3_up:2
Rpl10a	0.694884	chr13_8864274_8870864	27ac_up:2
Anapc11	0.690597	chr11_120012426_120012716	4me3_up:1
1810032O08Rik	0.684959	chr11_116478376_116484036	4me3_up:2
Uqcr11	0.684197	chr10_80127095_80127895	4me3_up:1
Uqcr11	0.684197	chr10_80128095_80128385	4me3_up:1
Uqcr11	0.684197	chr10_80130105_80130255	4me3_up:1
Uqcr11	0.684197	chr10_80129695_80129895	4me3_up:1
Uqcr11	0.684197	chr10_80316725_80317235	27ac_up:1
Uqcr11	0.684197	chr10_80471375_80477065	27ac_up:1
Tmed1	0.676729	chr9_21247356_21248386	4me3_up:1
Tmed1	0.676729	chr9_21246226_21246846	4me3_up:1
Mdp1	0.676606	chr14_55833943_55844113	27ac_up:2
Gm13394	0.676479	chr2_29029370_29049310	4me3_up:1
Gm13394	0.676479	chr2_28909820_28911340	27ac_up:2
Gm13394	0.676479	chr2_28905570_28907670	27ac_up:1
Acss3	0.674644	chr10_107114934_107120484	27ac_up:4
Celsr1	0.670019	chr15_85791040_85797810	27ac_up:2
Atp6v1f	0.668385	chr6_29537320_29540830	4me3_up:2
Atp6v1f	0.668385	chr6_29814050_29816360	27ac_up:3
Atp6v1f	0.668385	chr6_29831980_29832740	27ac_up:1
Atp6v1f	0.668385	chr6_29652200_29663000	27ac_up:2
Psph	0.666727	chr5_129700305_129704205	27ac_up:4
Psph	0.666727	chr5_129704985_129705145	27ac_up:1
Psph	0.666727	chr5_130020900_130023180	4me1_up:3
Naca	0.666006	chr10_127570214_127572054	4me3_up:1
Naca	0.666006	chr10_128337954_128349744	27ac_up:1
Plekhb1	0.665918	chr7_100657596_100659006	4me3_up:5
Plekhb1	0.665918	chr7_100656956_100657476	4me3_up:1
Srgap3	0.663096	chr6_112835206_112895936	4me1_up:3
Eif2s2	0.657902	chr2_155089664_155094214	4me3_up:6
Rpl13	0.656317	chr8_122864730_122864980	27ac_up:1
Rpl13	0.656317	chr8_122848520_122856500	27ac_up:3
Rpl13	0.656317	chr8_122856650_122857350	27ac_up:1
Rps21	0.655897	chr2_180468475_180470755	27ac_up:1
Atp5h	0.653875	chr11_115615586_115616516	27ac_up:6;4me1_up:6
Atp5h	0.653875	chr11_115617696_115620876	27ac_up:5;4me1_up:5
Atp5h	0.653875	chr11_115616646_115617516	27ac_up:2;4me1_up:2
Atp5h	0.653875	chr11_115266306_115266416	27ac_up:1
Atp5h	0.653875	chr11_115266586_115266986	27ac_up:1
Atp5h	0.653875	chr11_115621046_115623416	27ac_up:1
Gm5617	0.652158	chr9_48339617_48340567	4me3_up:4
Gm5617	0.652158	chr9_48337837_48339507	4me3_up:6
Eif4a2	0.641046	chr16_23081177_23081687	27ac_up:1
Uqcr10	0.640536	chr11_4904947_4906927	27ac_up:3
Gnpnat1	0.639589	chr14_45476105_45480745	4me3_up:8
Gnpnat1	0.639589	chr14_45475675_45475885	4me3_up:1
Gnpnat1	0.639589	chr14_45475185_45475565	4me3_up:1
Gm13657	0.637219	chr2_75754143_75759983	4me1_up:1
Rps25	0.636404	chr6_145587660_145594350	4me3_up:2
Rps25	0.636404	chr9_44614307_44623617	27ac_up:1
Gng11	0.635078	chr6_3677220_3679480	27ac_up:1
Ndufb8	0.633972	chr19_44127480_44129190	27ac_up:1
Adh4	0.631148	chr3_138451996_138452866	4me3_up:1
Adh4	0.631148	chr3_138381006_138381626	4me3_up:1
Adh4	0.631148	chr3_138374206_138376256	4me3_up:1
Adh4	0.631148	chr3_138419326_138420616	4me3_up:1
Adh4	0.631148	chr3_138418476_138419186	4me3_up:2
2810410L24Rik	0.628868	chr11_120002616_120006356	4me3_up:2
2810410L24Rik	0.628868	chr11_120009466_120009606	4me3_up:1
2810410L24Rik	0.628868	chr11_120012426_120012716	4me3_up:2
2810410L24Rik	0.628868	chr11_120013726_120014756	4me3_up:2
2810410L24Rik	0.628868	chr11_120008436_120009266	4me3_up:1
Rpl14	0.628077	chr7_45563010_45565950	27ac_up:9
Rpl14	0.628077	chr7_45296150_45298230	27ac_up:1
Kif5a	0.626407	chr10_127570214_127572054	4me3_up:1
H2afv	0.625445	chr11_6028957_6033107	4me3_up:1
H2afv	0.625445	chr11_6034567_6040677	4me1_up:1
G0s2	0.620337	chr1_193242356_193245326	4me3_up:11
G0s2	0.620337	chr1_193304586_193320426	4me3_up:6
G0s2	0.620337	chr1_193236926_193240226	4me3_up:2
G0s2	0.620337	chr1_193241456_193242166	4me3_up:3
G0s2	0.620337	chr1_193241186_193241326	4me3_up:1
Snrpd2	0.619891	chr7_19305301_19306551	27ac_up:1
Gm2788	0.61684	chr7_48828510_48830390	27ac_up:1
Gm2788	0.61684	chr7_48825140_48825560	27ac_up:1
Pabpn1	0.615368	chr14_55082933_55092003	4me3_up:13
Psma5	0.615336	chr3_107930892_107931312	4me3_up:1
Psma5	0.615336	chr3_107931382_107931612	4me3_up:1
Psma5	0.615336	chr3_108224432_108226122	27ac_up:8
Psma5	0.615336	chr3_108226192_108226362	27ac_up:1
Osbpl8	0.614712	chr10_111313394_111316694	27ac_up:2
Coq2	0.611306	chr5_100915921_100917391	27ac_up:1
Rps11	0.610923	chr7_45563010_45565950	27ac_up:7
Rps11	0.610923	chr7_45296150_45298230	27ac_up:1
A430046D13Rik	0.610584	chr10_128337954_128349744	27ac_up:1
Psma3	0.607134	chr12_70868083_70869413	4me3_up:1
Psma3	0.607134	chr12_70992053_70993003	27ac_up:1
Insig1	0.605438	chr5_28034660_28044760	4me3_up:7
Lag3	0.599877	chr6_124879692_124888072	4me3_up:5
Aatk	0.598088	chr11_120013726_120014756	4me3_up:5
Aatk	0.598088	chr11_120002616_120006356	4me3_up:2
Aatk	0.598088	chr11_120009466_120009606	4me3_up:1
Aatk	0.598088	chr11_120012426_120012716	4me3_up:2
Aatk	0.598088	chr11_120008436_120009266	4me3_up:2
Aatk	0.598088	chr11_120009746_120009826	4me3_up:1
Tcta	0.597727	chr9_108384329_108388269	27ac_up:1
Tcta	0.597727	chr9_108393639_108395289	27ac_up:3
Tcta	0.597727	chr9_108391059_108391669	27ac_up:3
Tcta	0.597727	chr9_108392859_108393229	27ac_up:2
Tcta	0.597727	chr9_108395379_108397189	27ac_up:1
Tcta	0.597727	chr9_108374769_108375689	27ac_up:1
Gm11273	0.596533	chr13_21159521_21162741	4me1_up:7
Trpm7	0.594955	chr2_126913844_126915244	27ac_up:1
Cela1	0.592625	chr15_101045929_101050189	27ac_up:4
Nr4a1	-0.585878	chr15_101130769_101134129	4me3_down:6
Nr4a1	-0.585878	chr15_101130049_101130669	4me3_down:3
Nr4a1	-0.585878	chr15_101129059_101129959	4me3_down:2
Nr4a1	-0.585878	chr15_101128579_101128919	4me3_down:1
Lrrc47	-0.58678	chr4_154221251_154224091	27ac_down:3
Tctn3	-0.586993	chr19_40636110_40642250	27ac_down:9
Tctn3	-0.586993	chr19_40245110_40249610	27ac_down:3
Impdh1	-0.587087	chr6_28795930_28828120	27ac_down:2
Impdh1	-0.587087	chr6_28608720_28625690	27ac_down:1
Impdh1	-0.587087	chr6_28777330_28788870	27ac_down:1
Impdh1	-0.587087	chr6_28639820_28645590	27ac_down:1
Impdh1	-0.587087	chr6_28838480_28874860	27ac_down:2
Impdh1	-0.587087	chr6_28703360_28707030	27ac_down:1
Prdm11	-0.587166	chr2_92746863_92759863	4me3_down:6;27ac_down:6
Prdm11	-0.587166	chr2_93033443_93045973	27ac_down:7
Ctdsp1	-0.587915	chr1_73928106_73935896	4me3_down:1
Ctdsp1	-0.587915	chr1_74087166_74114956	27ac_down:8
Wnk1	-0.588596	chr6_120107532_120125942	4me3_down:7
Wnk1	-0.588596	chr6_120144132_120161842	27ac_down:18
Abcg5	-0.588907	chr17_84648220_84648710	27ac_down:2
Abcg5	-0.588907	chr17_84644170_84644710	27ac_down:1
Abcg5	-0.588907	chr17_84644790_84646030	27ac_down:1
Csf2rb	-0.589361	chr15_78244720_78250380	4me3_down:13
Csf2rb	-0.589361	chr15_78326090_78335050	4me3_down:7
Csf2rb	-0.589361	chr15_78597110_78602690	4me3_down:14
Csf2rb	-0.589361	chr15_78570800_78572730	27ac_down:9
Csf2rb	-0.589361	chr15_78566030_78570730	27ac_down:2
Ppt2	-0.589411	chr17_34306045_34310555	4me3_down:2;27ac_down:2
Ppt2	-0.589411	chr17_34655065_34660525	4me3_down:3
Ppt2	-0.589411	chr17_34614995_34615165	27ac_down:1
Ppt2	-0.589411	chr17_34614775_34614875	27ac_down:1
Tuft1	-0.589475	chr3_94850928_94853878	27ac_down:1
C2	-0.589682	chr17_35215345_35220165	4me3_down:3
C2	-0.589682	chr17_34655065_34660525	4me3_down:2
C2	-0.589682	chr17_35173275_35175965	4me3_down:1
C2	-0.589682	chr17_34306045_34310555	4me3_down:1;27ac_down:1
Ankrd52	-0.58977	chr10_128239994_128240134	27ac_down:1
Ankrd52	-0.58977	chr10_128240284_128240374	27ac_down:1
Ankrd52	-0.58977	chr10_128238114_128239824	27ac_down:1
E2f4	-0.591218	chr8_105614790_105614940	4me3_down:1
E2f4	-0.591218	chr8_105615020_105615420	4me3_down:2
E2f4	-0.591218	chr8_105614520_105614640	4me3_down:1
E2f4	-0.591218	chr8_105731830_105732710	27ac_down:2
E2f4	-0.591218	chr8_105464080_105467490	27ac_down:3
C1qtnf1	-0.591936	chr11_118428566_118433796	4me3_down:19
C1qtnf1	-0.591936	chr11_118433896_118442706	4me3_down:5
C1qtnf1	-0.591936	chr11_118425866_118427106	4me3_down:1
C1qtnf1	-0.591936	chr11_118320206_118332356	27ac_down:6
AI606181	-0.59202	chr19_41332340_41349730	4me3_down:5
AI606181	-0.59202	chr19_41595850_41599810	27ac_down:12
AI606181	-0.59202	chr19_41451300_41457770	27ac_down:13
Slc29a3	-0.59214	chr10_60790452_60831082	4me3_down:21
Slc29a3	-0.59214	chr10_61057752_61066782	27ac_down:2
Slc29a3	-0.59214	chr10_60393032_60399722	27ac_down:1
Ppl	-0.593361	chr16_4850940_4851470	27ac_down:1
Cntfr	-0.593414	chr4_41553017_41559587	4me3_down:5
Atp1b1	-0.59362	chr1_164488069_164506349	27ac_down:11
Atp1b1	-0.59362	chr1_164627649_164634549	27ac_down:3
Gys2	-0.594373	chr6_142610850_142614410	27ac_down:1
Gys2	-0.594373	chr6_142614510_142614590	27ac_down:1
Tom1l2	-0.594842	chr11_60137608_60140078	27ac_down:7
Tom1l2	-0.594842	chr11_60124568_60137588	27ac_down:6
Tom1l2	-0.594842	chr11_59742098_59743768	27ac_down:1
Tom1l2	-0.594842	chr11_59743818_59744748	27ac_down:1
Tom1l2	-0.594842	chr11_60140368_60148438	27ac_down:1
Tom1l2	-0.594842	chr11_60156728_60185088	27ac_down:1
Aph1c	-0.594962	chr9_67024493_67027883	27ac_down:5
Aph1c	-0.594962	chr9_66901523_66919503	27ac_down:4
Aph1c	-0.594962	chr9_67019343_67022583	27ac_down:3
Aph1c	-0.594962	chr9_67023433_67023833	27ac_down:1
Aph1c	-0.594962	chr9_66863483_66891933	27ac_down:1
Agpat1	-0.595306	chr17_34306045_34310555	4me3_down:2;27ac_down:2
Agpat1	-0.595306	chr17_34655065_34660525	4me3_down:3
Agpat1	-0.595306	chr17_35173275_35175965	4me3_down:1
Agpat1	-0.595306	chr17_34614995_34615165	27ac_down:1
Agpat1	-0.595306	chr17_34614775_34614875	27ac_down:1
Cideb	-0.596336	chr14_55781733_55781833	4me3_down:1
Cideb	-0.596336	chr14_55782023_55784173	4me3_down:3
Cideb	-0.596336	chr14_55854423_55862943	4me3_down:6
Cideb	-0.596336	chr14_55780963_55781573	4me3_down:1
Zfp385a	-0.596415	chr15_103215349_103218679	4me3_down:32
Zfp385a	-0.596415	chr15_103213249_103215019	4me3_down:25
Zfp385a	-0.596415	chr15_103453979_103454969	4me3_down:6
Zfp385a	-0.596415	chr15_103215119_103215259	4me3_down:2
Hsph1	-0.597503	chr5_149566465_149572005	4me3_down:2
Hsph1	-0.597503	chr5_149312623_149324105	27ac_down:3
Bach2	-0.598867	chr4_32323035_32373565	27ac_down:2
Bach2	-0.598867	chr4_32396045_32407425	27ac_down:9
Bach2	-0.598867	chr4_32239425_32311715	27ac_down:5
Bach2	-0.598867	chr4_32485875_32487785	27ac_down:1
Pdia5	-0.599217	chr16_35308504_35310564	27ac_down:1
Disp2	-0.599397	chr2_118600284_118602834	27ac_down:3
Disp2	-0.599397	chr2_118526874_118528754	27ac_down:1
Disp2	-0.599397	chr2_118517964_118524544	27ac_down:1
Xylb	-0.599409	chr9_119075072_119075762	27ac_down:3
Xylb	-0.599409	chr9_119075992_119076082	27ac_down:1
Xylb	-0.599409	chr9_119076212_119078082	27ac_down:1
Clec2h	-0.599465	chr6_128885282_128887582	4me3_down:3
Clec2h	-0.599465	chr6_128888102_128890812	4me3_down:2
Clec2h	-0.599465	chr6_128887662_128888022	4me3_down:1
Nfatc1	-0.600599	chr18_80682311_80697551	4me3_down:19;27ac_down:19
Nfatc1	-0.600599	chr18_80698651_80708031	27ac_down:12
Nfatc1	-0.600599	chr18_80658911_80662511	27ac_down:3
Nfatc1	-0.600599	chr18_80636071_80647431	27ac_down:2
Myl9	-0.60127	chr2_156722094_156745284	27ac_down:10
Myl9	-0.60127	chr2_156859874_156862594	27ac_down:5
Myl9	-0.60127	chr2_156970134_156984664	27ac_down:4
Myl9	-0.60127	chr2_156079464_156094874	27ac_down:1
Lynx1	-0.604316	chr15_74924740_74941970	4me3_down:25
Lynx1	-0.604316	chr15_74997630_74997840	4me3_down:1
Lynx1	-0.604316	chr15_74993430_74994870	4me3_down:2
Lynx1	-0.604316	chr15_74995470_74996450	4me3_down:1
Lynx1	-0.604316	chr15_74920370_74922250	4me3_down:2
Lynx1	-0.604316	chr15_74996560_74997530	4me3_down:1
Lynx1	-0.604316	chr15_74901740_74907860	27ac_down:5
Plekhm3	-0.604404	chr1_64833126_64856206	27ac_down:10
Plekhm3	-0.604404	chr1_64931376_64934426	27ac_down:3
Irgm1	-0.604591	chr11_48900388_48901858	4me3_down:6
Irgm1	-0.604591	chr11_48987888_48991998	4me3_down:5;27ac_down:4
Irgm1	-0.604591	chr11_48902008_48902118	4me3_down:1
Angel1	-0.604673	chr12_86928950_86937040	27ac_down:8
Angel1	-0.604673	chr12_86966980_86971240	27ac_down:1
Angel1	-0.604673	chr12_86780950_86782640	27ac_down:1
Mnt	-0.60648	chr11_74869168_74878678	27ac_down:6
Mnt	-0.60648	chr11_74999428_75002908	27ac_down:1
Mnt	-0.60648	chr11_75560988_75562768	4me1_down:2
Mnt	-0.60648	chr11_75532788_75543148	4me1_down:1
Mnt	-0.60648	chr11_75563708_75566978	4me1_down:1
Pcsk4	-0.606845	chr10_80070045_80072355	4me3_down:8
Pcsk4	-0.606845	chr10_80072515_80082605	4me3_down:5
Pcsk4	-0.606845	chr10_80471375_80477065	27ac_down:33
Pcsk4	-0.606845	chr10_80897365_80897835	27ac_down:1
Pcsk4	-0.606845	chr10_80898105_80898175	27ac_down:1
Pcsk4	-0.606845	chr10_80895205_80897195	27ac_down:1
Pcsk4	-0.606845	chr10_80898315_80899175	27ac_down:1
Col4a1	-0.609135	chr8_11267650_11312510	4me3_down:33;27ac_down:6
Col4a1	-0.609135	chr8_11313680_11354270	4me3_down:21;27ac_down:7
Col4a1	-0.609135	chr8_11313110_11313410	4me3_down:3
Col4a1	-0.609135	chr8_11313500_11313620	4me3_down:1
Col4a1	-0.609135	chr8_11359200_11390440	27ac_down:7
Col4a1	-0.609135	chr8_11414030_11414740	27ac_down:4
Col4a1	-0.609135	chr8_11410090_11413970	27ac_down:13
Col4a1	-0.609135	chr8_11414800_11415360	27ac_down:1
Col4a1	-0.609135	chr8_10987010_11004460	27ac_down:3
Col4a1	-0.609135	chr8_11451520_11453970	4me1_down:2
Col4a1	-0.609135	chr8_11454520_11467000	4me1_down:5
Thpo	-0.610112	chr16_20372217_20374987	27ac_down:2
Thpo	-0.610112	chr16_20369207_20372117	27ac_down:1
Lrrc8c	-0.612441	chr5_105557191_105560221	27ac_down:5
Papss2	-0.612585	chr19_32335370_32348690	27ac_down:7
Papss2	-0.612585	chr19_32371370_32388210	27ac_down:3
Ifi203	-0.613156	chr1_174028479_174031619	4me3_down:2
Ifi203	-0.613156	chr1_173761879_173766809	4me3_down:6;27ac_down:6
Ifi203	-0.613156	chr1_173631149_173637279	4me3_down:1;27ac_down:1
Ifi203	-0.613156	chr1_173736469_173741579	4me3_down:2
Slc35a4	-0.613333	chr18_36705916_36710946	4me1_down:17
Slc35a4	-0.613333	chr18_36407136_36425746	4me1_down:15
Zbp1	-0.613564	chr2_173234459_173276079	27ac_down:22
Zbp1	-0.613564	chr2_173685769_173687109	27ac_down:1
Zbp1	-0.613564	chr2_173423699_173430219	27ac_down:2
Zbp1	-0.613564	chr2_173021419_173022789	4me1_down:5
Zbp1	-0.613564	chr2_173023379_173033499	4me1_down:7
Zbp1	-0.613564	chr2_173022909_173023319	4me1_down:1
Hba-a1	-0.614634	chr11_32604510_32606440	27ac_down:1
Slc25a42	-0.61486	chr8_70617021_70617561	4me3_down:1
Slc25a42	-0.61486	chr8_70388161_70391201	27ac_down:2
Nphp1	-0.615247	chr2_128149564_128158224	27ac_down:4
Nphp1	-0.615247	chr2_127990484_127992404	27ac_down:2
Cebpd	-0.61535	chr16_15979007_15994737	27ac_down:17
Cebpd	-0.61535	chr16_15931197_15933657	27ac_down:1
Tmc7	-0.615761	chr7_118475456_118485106	4me3_down:2
Tmc7	-0.615761	chr7_118797046_118800436	27ac_down:2
Tmc7	-0.615761	chr7_118452786_118453496	27ac_down:1
Tmc7	-0.615761	chr7_118253636_118268716	27ac_down:1
Tmc7	-0.615761	chr7_118800496_118801256	27ac_down:1
Tmc7	-0.615761	chr7_118567486_118584596	27ac_down:1
Tmc7	-0.615761	chr7_118490946_118492586	27ac_down:1
Fblim1	-0.615801	chr4_141599915_141605915	4me3_down:29
Fblim1	-0.615801	chr4_141595945_141599845	4me3_down:22
Fblim1	-0.615801	chr4_141641495_141641985	4me3_down:1
Fblim1	-0.615801	chr4_141640185_141641415	4me3_down:4
Fblim1	-0.615801	chr4_141642085_141642405	4me3_down:1
Fblim1	-0.615801	chr4_141175675_141177585	27ac_down:1
Fblim1	-0.615801	chr4_141951675_141954035	27ac_down:2
Fblim1	-0.615801	chr4_141954185_141955285	27ac_down:1
Elf4	-0.615886	chrX_48424353_48437753	27ac_down:15
Elf4	-0.615886	chrX_48422703_48424073	27ac_down:2
Ms4a6d	-0.616354	chr19_11469550_11471080	4me3_down:6
Ms4a6d	-0.616354	chr19_11471250_11472390	4me3_down:2
Ms4a6d	-0.616354	chr19_11518670_11520320	4me3_down:4
Ms4a6d	-0.616354	chr19_11492130_11500140	27ac_down:5
Ppargc1b	-0.618084	chr18_61105996_61109606	4me3_down:6;27ac_down:6
Ppargc1b	-0.618084	chr18_61654536_61665296	4me3_down:7
Ppargc1b	-0.618084	chr18_61105676_61105776	4me3_down:2;27ac_down:2
Ppargc1b	-0.618084	chr18_61110496_61111956	27ac_down:1
Trib1	-0.618218	chr15_59539665_59591695	4me3_down:7
Trib1	-0.618218	chr15_59725285_59732715	27ac_down:25
Trib1	-0.618218	chr15_59716705_59718045	27ac_down:2
Trib1	-0.618218	chr15_59718285_59724165	27ac_down:7
Trib1	-0.618218	chr15_59361235_59362335	27ac_down:1
Trib1	-0.618218	chr15_59732765_59735015	27ac_down:2
Trib1	-0.618218	chr15_59360575_59361115	27ac_down:1
Pcgf2	-0.618272	chr11_97995126_97995816	4me3_down:2
Pcgf2	-0.618272	chr11_97667166_97669416	27ac_down:9
Pcgf2	-0.618272	chr11_97670346_97672456	27ac_down:10
Pcgf2	-0.618272	chr11_97669636_97670246	27ac_down:1
Akr1b10	-0.618742	chr6_34474950_34487280	27ac_down:5
Rela	-0.618839	chr19_5929380_5930950	4me1_down:1
Tes	-0.619567	chr6_17636610_17648510	4me3_down:2;27ac_down:1
Tpcn1	-0.619817	chr5_120774141_120777441	4me3_down:10;27ac_down:9
Tpcn1	-0.619817	chr5_120748781_120749921	4me3_down:3;27ac_down:3
Tpcn1	-0.619817	chr5_120905881_120907611	4me3_down:2;27ac_down:2
Tpcn1	-0.619817	chr5_120886061_120887701	4me3_down:2
Clec4a2	-0.620237	chr6_122952532_122952642	4me3_down:1;27ac_down:1
Clec4a2	-0.620237	chr6_123230592_123232092	4me3_down:1
Clec4a2	-0.620237	chr6_122800322_122803532	27ac_down:2
Fndc3b	-0.620681	chr3_27643088_27710338	4me3_down:2;27ac_down:23
Fndc3b	-0.620681	chr3_27518128_27528058	27ac_down:8
Fndc3b	-0.620681	chr3_27587998_27609658	27ac_down:12
Fndc3b	-0.620681	chr3_27620678_27640298	27ac_down:5
Fndc3b	-0.620681	chr3_27757798_27762258	27ac_down:5
Fndc3b	-0.620681	chr3_27763758_27770128	27ac_down:1
Fndc3b	-0.620681	chr3_27556978_27584898	27ac_down:4
Fndc3b	-0.620681	chr3_27610148_27611808	27ac_down:2
Fndc3b	-0.620681	chr3_27491158_27498768	27ac_down:1
Fndc3b	-0.620681	chr3_27640338_27642948	27ac_down:2
Fndc3b	-0.620681	chr3_27473488_27475238	27ac_down:1
Fndc3b	-0.620681	chr3_27751678_27752338	27ac_down:1
Prdm2	-0.622168	chr4_143102617_143107387	27ac_down:2
Prdm2	-0.622168	chr4_143114747_143127147	27ac_down:3
Fntb	-0.622473	chr12_76921403_76937263	27ac_down:8
Nlgn2	-0.623288	chr11_70026988_70030398	27ac_down:22
Dab2	-0.623728	chr15_6581040_6604980	4me3_down:5
Dab2	-0.623728	chr15_6518070_6531080	4me3_down:3;27ac_down:3
Dab2	-0.623728	chr15_6405810_6413510	27ac_down:5
Dab2	-0.623728	chr15_6566640_6569840	27ac_down:4
Dab2	-0.623728	chr15_6561330_6566550	27ac_down:5
Dab2	-0.623728	chr15_6277050_6280750	27ac_down:5
Lrrc8a	-0.624009	chr2_30595070_30608150	4me3_down:1
Lrrc8a	-0.624009	chr2_30543370_30558410	27ac_down:11
Lrrc8a	-0.624009	chr2_30740670_30746600	27ac_down:1
Pck1	-0.624229	chr2_173234459_173276079	27ac_down:12
Pck1	-0.624229	chr2_173023379_173033499	4me1_down:8
Pck1	-0.624229	chr2_173021419_173022789	4me1_down:7
Pck1	-0.624229	chr2_173022909_173023319	4me1_down:1
Ctif	-0.62472	chr18_75414346_75431216	27ac_down:2
Ctif	-0.62472	chr18_75435406_75437166	27ac_down:5
Ctif	-0.62472	chr18_75838586_75840746	4me1_down:1
Gapdh	-0.626808	chr6_125570622_125571622	4me3_down:1;27ac_down:1
Gapdh	-0.626808	chr6_125472502_125494572	4me3_down:6
Gapdh	-0.626808	chr6_125572082_125581042	4me3_down:2;27ac_down:5
Etv6	-0.62788	chr6_134139382_134162142	4me3_down:17
Etv6	-0.62788	chr6_134427452_134430062	27ac_down:1
Etv6	-0.62788	chr6_134179572_134194452	27ac_down:1
Etv6	-0.62788	chr6_134194892_134213382	27ac_down:1
Pim2	-0.62789	chrX_7738514_7741204	27ac_down:4
Scaf4	-0.628717	chr16_90416285_90432505	27ac_down:18
Scaf4	-0.628717	chr16_90230235_90241275	27ac_down:1
Scaf4	-0.628717	chr16_90453815_90464135	27ac_down:1
Timeless	-0.629039	chr10_128239994_128240134	27ac_down:1
Timeless	-0.629039	chr10_128240284_128240374	27ac_down:1
Timeless	-0.629039	chr10_128238114_128239824	27ac_down:1
Fmod	-0.630652	chr1_134163843_134165493	27ac_down:2
Fmod	-0.630652	chr1_134090063_134101233	4me1_down:12
Ctgf	-0.631297	chr10_24491514_24495094	27ac_down:8
Tgfb1	-0.632062	chr7_25705071_25711111	4me3_down:25
Tgfb1	-0.632062	chr7_25125611_25132421	4me3_down:1
Tgfb1	-0.632062	chr7_25787511_25788411	27ac_down:10
Tgfb1	-0.632062	chr7_25786001_25786881	27ac_down:1
Tgfb1	-0.632062	chr7_25786981_25787281	27ac_down:1
Mthfd1l	-0.632257	chr10_3823470_3836750	4me3_down:6
Mthfd1l	-0.632257	chr10_3973480_3978640	27ac_down:5
Mthfd1l	-0.632257	chr10_3978720_3980220	27ac_down:4
Setd1a	-0.632334	chr7_128043616_128052636	27ac_down:2
Setd1a	-0.632334	chr7_127803726_127806836	4me1_down:9
Setd1a	-0.632334	chr7_127801936_127802006	4me1_down:1
Setd1a	-0.632334	chr7_127802106_127802226	4me1_down:2
Setd1a	-0.632334	chr7_127801246_127801456	4me1_down:1
Setd1a	-0.632334	chr7_127801616_127801826	4me1_down:1
Setd1a	-0.632334	chr7_127802396_127802776	4me1_down:1
Gigyf1	-0.63244	chr5_137855062_137857152	4me3_down:1
Gigyf1	-0.63244	chr5_137703012_137710882	27ac_down:8
Gigyf1	-0.63244	chr5_137493562_137494502	27ac_down:1
Tcf7	-0.632607	chr11_51910588_51949808	27ac_down:3
Tcf7	-0.632607	chr11_52336998_52343168	27ac_down:8
Tcf7	-0.632607	chr11_52335578_52336828	27ac_down:1
Tcf7	-0.632607	chr11_52261618_52276258	27ac_down:1
Tcf7	-0.632607	chr11_52293008_52295668	27ac_down:2
Slc9a1	-0.632944	chr4_134127805_134127915	4me3_down:1
Slc9a1	-0.632944	chr4_133136275_133147145	4me3_down:4
Slc9a1	-0.632944	chr4_134125165_134126205	4me3_down:1
Slc9a1	-0.632944	chr4_134126275_134126365	4me3_down:1
Slc9a1	-0.632944	chr4_134126505_134126585	4me3_down:1
Slc9a1	-0.632944	chr4_134128085_134128615	4me3_down:1
Slc9a1	-0.632944	chr4_134126775_134127405	4me3_down:1
Slc9a1	-0.632944	chr4_133295385_133296415	27ac_down:2
Slc9a1	-0.632944	chr4_133383685_133410915	27ac_down:1
Slc9a1	-0.632944	chr4_133298445_133300015	27ac_down:3
Slc9a1	-0.632944	chr4_132641545_132656685	27ac_down:1
Slc9a1	-0.632944	chr4_133296585_133297415	27ac_down:1
Slc9a1	-0.632944	chr4_134109115_134109555	27ac_down:1
Slc9a1	-0.632944	chr4_134108355_134109085	27ac_down:1
Vangl1	-0.633413	chr3_102656597_102672197	27ac_down:1
Vangl1	-0.633413	chr3_102454367_102455467	27ac_down:1
Ap3m1	-0.633423	chr14_20604928_20607078	27ac_down:1
Ap3m1	-0.633423	chr14_20607898_20611098	27ac_down:1
Ap3m1	-0.633423	chr14_21543808_21563148	27ac_down:1
Ap3m1	-0.633423	chr14_20753818_20754178	27ac_down:1
Fam102a	-0.636043	chr2_32505410_32525350	4me3_down:8
Fam102a	-0.636043	chr2_32384880_32385410	4me3_down:1;27ac_down:1
Fam102a	-0.636043	chr2_32386040_32387020	4me3_down:1;27ac_down:1
Fam102a	-0.636043	chr2_32293390_32295230	27ac_down:3
Fam102a	-0.636043	chr2_32759700_32760430	27ac_down:1
Fam102a	-0.636043	chr2_32758930_32759520	27ac_down:2
Fam102a	-0.636043	chr2_32757560_32758290	27ac_down:1
Pde4a	-0.637729	chr9_21526306_21528756	4me3_down:2
Pde4a	-0.637729	chr9_21490856_21494496	27ac_down:3
Pde4a	-0.637729	chr9_20942616_20951836	27ac_down:12
Pde4a	-0.637729	chr9_21368596_21373496	27ac_down:14
Eid1	-0.637898	chr2_125382104_125383604	27ac_down:3
Eid1	-0.637898	chr2_125911254_125929554	27ac_down:2
Eid1	-0.637898	chr2_125896784_125902864	27ac_down:1
Eid1	-0.637898	chr2_125931404_125944144	27ac_down:3
Eid1	-0.637898	chr2_125893434_125896644	27ac_down:1
Eid1	-0.637898	chr2_125383734_125386184	27ac_down:2
Eid1	-0.637898	chr2_125380114_125381984	27ac_down:1
Ido2	-0.638253	chr8_24464108_24468128	27ac_down:1
Ptpn23	-0.639133	chr9_110710156_110711076	4me3_down:3
Ptpn23	-0.639133	chr9_110711156_110711246	4me3_down:1
Ptpn23	-0.639133	chr9_110711586_110713806	4me3_down:2
Ptpn23	-0.639133	chr9_110455486_110465876	27ac_down:4
Ptpn23	-0.639133	chr9_110099266_110100806	27ac_down:4
Fus	-0.639812	chr7_128374036_128385766	27ac_down:1
Fus	-0.639812	chr7_128043616_128052636	27ac_down:5
Fus	-0.639812	chr7_127801936_127802006	4me1_down:1
Fus	-0.639812	chr7_127803726_127806836	4me1_down:7
Fus	-0.639812	chr7_127802106_127802226	4me1_down:1
Fus	-0.639812	chr7_127801246_127801456	4me1_down:1
Fus	-0.639812	chr7_127801616_127801826	4me1_down:1
Fus	-0.639812	chr7_127802396_127802776	4me1_down:1
Fmnl1	-0.640501	chr11_103280426_103283496	4me3_down:3
Fmnl1	-0.640501	chr11_103347036_103347796	27ac_down:8
Fmnl1	-0.640501	chr11_103344916_103345406	27ac_down:2
Fmnl1	-0.640501	chr11_103340396_103344506	27ac_down:14
Fmnl1	-0.640501	chr11_103345456_103346846	27ac_down:11
Fmnl1	-0.640501	chr11_103302306_103322796	27ac_down:4
Serpina6	-0.640637	chr12_104247780_104250130	4me3_down:1
Serpina6	-0.640637	chr12_103705210_103706810	27ac_down:1
Arid1a	-0.640717	chr4_134127805_134127915	4me3_down:1
Arid1a	-0.640717	chr4_134125165_134126205	4me3_down:1
Arid1a	-0.640717	chr4_134126275_134126365	4me3_down:1
Arid1a	-0.640717	chr4_134126505_134126585	4me3_down:1
Arid1a	-0.640717	chr4_134128085_134128615	4me3_down:1
Arid1a	-0.640717	chr4_134126775_134127405	4me3_down:1
Arid1a	-0.640717	chr4_134109655_134112505	27ac_down:2
Arid1a	-0.640717	chr4_134104735_134108245	27ac_down:1
Arid1a	-0.640717	chr4_134109115_134109555	27ac_down:1
Arid1a	-0.640717	chr4_134108355_134109085	27ac_down:1
Myo18a	-0.641154	chr11_77621508_77628268	27ac_down:19
Myo18a	-0.641154	chr11_77442058_77449378	27ac_down:1
Hip1r	-0.641557	chr5_124376291_124378071	27ac_down:1
Hip1r	-0.641557	chr5_124328221_124338621	27ac_down:6
Il1r1	-0.642947	chr1_39914955_39928035	4me3_down:6
Il1r1	-0.642947	chr1_40136795_40142005	27ac_down:11
Il1r1	-0.642947	chr1_40127735_40129705	27ac_down:1
Il1r1	-0.642947	chr1_39967705_39970715	27ac_down:1
Alg3	-0.643216	chr16_20369207_20372117	27ac_down:4
Alg3	-0.643216	chr16_20372217_20374987	27ac_down:3
Zmat3	-0.643777	chr3_32393538_32424278	27ac_down:6
Slc7a8	-0.644227	chr14_54442453_54447863	4me1_down:1
Samd4b	-0.644672	chr7_28441711_28443211	4me3_down:9
Samd4b	-0.644672	chr7_28439981_28440931	4me3_down:8
Samd4b	-0.644672	chr7_28441041_28441431	4me3_down:2
Samd4b	-0.644672	chr7_28441521_28441661	4me3_down:1
Samd4b	-0.644672	chr7_28428971_28436131	27ac_down:5
Samd4b	-0.644672	chr7_28408431_28413661	27ac_down:5
Samd4b	-0.644672	chr7_28771851_28772091	27ac_down:1
Samd4b	-0.644672	chr7_28870121_28871651	27ac_down:1
Samd4b	-0.644672	chr7_28772201_28774891	27ac_down:1
Samd4b	-0.644672	chr7_28767671_28771801	27ac_down:1
Derl3	-0.645257	chr10_75222175_75222985	27ac_down:1
Kif26b	-0.646414	chr1_178491609_178493429	27ac_down:3
Ldb1	-0.647252	chr19_45842660_45845240	27ac_down:3
Ldb1	-0.647252	chr19_46030870_46032600	27ac_down:2
Ldb1	-0.647252	chr19_46034180_46034380	27ac_down:1
Ldb1	-0.647252	chr19_46033340_46034030	27ac_down:1
Ldb1	-0.647252	chr19_46034510_46034610	27ac_down:1
Ldb1	-0.647252	chr19_46034690_46034820	27ac_down:1
Ldb1	-0.647252	chr19_45591790_45598710	27ac_down:1
Ldb1	-0.647252	chr19_45589060_45591720	27ac_down:1
Acsf2	-0.647367	chr11_95002126_95004556	27ac_down:1
Atxn7l1	-0.647385	chr12_33191665_33196475	27ac_down:8
Atxn7l1	-0.647385	chr12_33040395_33042355	27ac_down:5
Atxn7l1	-0.647385	chr12_33131365_33133325	27ac_down:9
Atxn7l1	-0.647385	chr12_33165035_33190645	27ac_down:1
Atxn7l1	-0.647385	chr12_33038915_33040385	27ac_down:2
Atxn7l1	-0.647385	chr12_33220675_33227655	27ac_down:1
Socs3	-0.64804	chr11_118428566_118433796	4me3_down:2
Socs3	-0.64804	chr11_118320206_118332356	27ac_down:4
Socs3	-0.64804	chr11_118014716_118017516	4me1_down:11
Socs3	-0.64804	chr11_118005886_118014566	4me1_down:12
Pvr	-0.648975	chr7_19635011_19635301	27ac_down:1
Pvr	-0.648975	chr7_19635401_19635651	27ac_down:1
Pvr	-0.648975	chr7_19634221_19634871	27ac_down:1
Myl12b	-0.649762	chr17_70749340_70752690	4me3_down:3;27ac_down:14
Myl12b	-0.649762	chr17_70746770_70748470	4me3_down:9;27ac_down:9
Tnfrsf1a	-0.651905	chr6_125570622_125571622	4me3_down:1;27ac_down:1
Tnfrsf1a	-0.651905	chr6_125472502_125494572	4me3_down:6
Tnfrsf1a	-0.651905	chr6_125572082_125581042	4me3_down:1;27ac_down:4
Zbtb7c	-0.652719	chr18_75838586_75840746	4me1_down:4
Ly6d	-0.653261	chr15_74924740_74941970	4me3_down:22
Ly6d	-0.653261	chr15_74997630_74997840	4me3_down:1
Ly6d	-0.653261	chr15_74993430_74994870	4me3_down:1
Ly6d	-0.653261	chr15_74995470_74996450	4me3_down:1
Ly6d	-0.653261	chr15_74920370_74922250	4me3_down:1
Ly6d	-0.653261	chr15_74996560_74997530	4me3_down:1
Ly6d	-0.653261	chr15_74901740_74907860	27ac_down:2
Rph3al	-0.654182	chr11_76066888_76068088	27ac_down:2
Rph3al	-0.654182	chr11_76063048_76066738	27ac_down:2
Rph3al	-0.654182	chr11_76282848_76329938	4me1_down:1
Rph3al	-0.654182	chr11_75532788_75543148	4me1_down:1
Rph3al	-0.654182	chr11_75531778_75532108	4me1_down:1
Rph3al	-0.654182	chr11_75532408_75532578	4me1_down:1
P2ry6	-0.656553	chr7_100853106_100863286	4me3_down:13
P2ry6	-0.656553	chr7_100962006_100964216	4me3_down:4
P2ry6	-0.656553	chr7_100851706_100853036	4me3_down:2
P2ry6	-0.656553	chr7_100959446_100961906	4me3_down:1
P2ry6	-0.656553	chr7_100977716_100980196	27ac_down:6
P2ry6	-0.656553	chr7_101388716_101390056	27ac_down:1
Tmem104	-0.657514	chr11_114890316_114893236	4me3_down:1
Tmem104	-0.657514	chr11_115188316_115193286	4me3_down:15
Tmem104	-0.657514	chr11_115126446_115136106	4me3_down:2
Tmem104	-0.657514	chr11_114897816_114899336	4me3_down:2;27ac_down:2
Tmem104	-0.657514	chr11_114928616_114934206	27ac_down:2
Tmem104	-0.657514	chr11_114916656_114918476	27ac_down:1
Chst12	-0.657741	chr5_140201046_140224246	4me3_down:15
Chst12	-0.657741	chr5_140755246_140757706	27ac_down:1
Chst12	-0.657741	chr5_140173056_140179976	27ac_down:4
Chst12	-0.657741	chr5_140163786_140168726	27ac_down:1
Chst12	-0.657741	chr5_140143176_140143916	27ac_down:2
Sik1	-0.660138	chr17_31867255_31881505	4me3_down:25;27ac_down:30
Sik1	-0.660138	chr17_32104415_32120885	27ac_down:31
Sik1	-0.660138	chr17_31976955_31987345	27ac_down:11
Sik1	-0.660138	chr17_32021065_32022765	27ac_down:6
Sik1	-0.660138	chr17_32022865_32025845	27ac_down:11
Sik1	-0.660138	chr17_32121625_32123395	27ac_down:5
Sik1	-0.660138	chr17_32229735_32242545	27ac_down:1
Sdc3	-0.660946	chr4_130913425_130926095	4me3_down:19
Sdc3	-0.660946	chr4_130827345_130830325	27ac_down:13
Kctd15	-0.66271	chr7_34915441_34916111	27ac_down:1
Kctd15	-0.66271	chr7_34917951_34919701	27ac_down:1
Sf1	-0.663021	chr19_6297690_6298070	4me3_down:4
Unc45b	-0.663483	chr11_82954778_82956258	4me3_down:4
Unc45b	-0.663483	chr11_83065338_83069238	4me3_down:5;27ac_down:5
Unc45b	-0.663483	chr11_82944428_82952098	4me3_down:7
Unc45b	-0.663483	chr11_83224308_83224448	4me3_down:1
Unc45b	-0.663483	chr11_83020028_83020568	4me3_down:1
Unc45b	-0.663483	chr11_83224628_83225528	4me3_down:2
Unc45b	-0.663483	chr11_83017718_83019908	4me3_down:3;4me1_down:3
Unc45b	-0.663483	chr11_83593078_83601258	4me3_down:1;27ac_down:1
Crtc1	-0.66445	chr8_70618361_70620561	4me3_down:27
Crtc1	-0.66445	chr8_70617021_70617561	4me3_down:3
Crtc1	-0.66445	chr8_70388161_70391201	27ac_down:2
Evc	-0.664516	chr5_37338721_37341781	4me3_down:13;27ac_down:13
Arsb	-0.667184	chr13_94128625_94137325	4me3_down:5
Samd10	-0.667872	chr2_181482135_181483205	4me1_down:6
Samd10	-0.667872	chr2_181486815_181488585	4me1_down:1
Pitpnm2	-0.668467	chr5_124328221_124338621	27ac_down:10
Pitpnm2	-0.668467	chr5_124376291_124378071	27ac_down:3
Mfsd2a	-0.668622	chr4_122867787_122869687	27ac_down:4
Kcnc3	-0.670631	chr7_44682710_44687120	27ac_down:8
Il34	-0.670705	chr8_110920100_110956750	27ac_down:2
Gbp11	-0.67164	chr5_105108321_105111191	4me3_down:2;4me1_down:2
Tns1	-0.671812	chr1_73928106_73935896	4me3_down:1
Tns1	-0.671812	chr1_74087166_74114956	27ac_down:15
1700001L05Rik	-0.672773	chr15_83029950_83033670	4me3_down:2
1700001L05Rik	-0.672773	chr15_83401990_83405250	27ac_down:1
1700001L05Rik	-0.672773	chr15_83397950_83401860	27ac_down:2
Ncoa6	-0.672889	chr2_155676654_155684814	27ac_down:6
Ncoa6	-0.672889	chr2_155803184_155807394	27ac_down:1
Ncoa6	-0.672889	chr2_155314594_155322344	27ac_down:3
Tram2	-0.674063	chr1_21034849_21037389	27ac_down:4
Tram2	-0.674063	chr1_21013509_21016849	27ac_down:6
Tram2	-0.674063	chr1_21037459_21044909	27ac_down:4
Kif20a	-0.67474	chr18_34457866_34460946	27ac_down:1
Kif20a	-0.67474	chr18_35241136_35242166	27ac_down:1
Pigt	-0.675065	chr2_164734310_164743020	27ac_down:3
Pigt	-0.675065	chr2_164747550_164750730	27ac_down:4
Alpl	-0.676768	chr4_137913845_137921015	4me3_down:10
Alpl	-0.676768	chr4_137921155_137926215	4me3_down:10
Alpl	-0.676768	chr4_137639305_137644335	27ac_down:7
Alpl	-0.676768	chr4_138515765_138517845	27ac_down:1
Alpl	-0.676768	chr4_137468915_137501055	4me1_down:3
Selplg	-0.676885	chr5_113821291_113830571	4me3_down:13
Selplg	-0.676885	chr5_113616611_113650211	27ac_down:14
Selplg	-0.676885	chr5_113943461_113946271	27ac_down:10
Heyl	-0.678385	chr4_123448257_123449347	27ac_down:1
Heyl	-0.678385	chr4_123445797_123448097	27ac_down:1
Atg13	-0.679173	chr2_91318443_91336933	27ac_down:1
Gm15889	-0.683062	chr8_94172870_94173120	4me3_down:1;27ac_down:1
Gm15889	-0.683062	chr8_94778140_94779550	4me3_down:1
Gm15889	-0.683062	chr8_94179880_94180100	4me3_down:1;27ac_down:1
Gm15889	-0.683062	chr8_94180320_94182580	4me3_down:2;27ac_down:2
Gm15889	-0.683062	chr8_94179330_94179820	4me3_down:1;27ac_down:1
Gm15889	-0.683062	chr8_94173190_94173330	4me3_down:1;27ac_down:1
Gm15889	-0.683062	chr8_94679510_94696030	27ac_down:1
Gm15889	-0.683062	chr8_94677340_94679340	27ac_down:1
Sema4d	-0.683344	chr13_51787481_51793491	27ac_down:23
Sema4d	-0.683344	chr13_52185181_52191961	27ac_down:1
Tmem176a	-0.683933	chr6_49205001_49213261	4me3_down:8
Tmem176a	-0.683933	chr6_49330921_49332721	27ac_down:1
Tmem176a	-0.683933	chr6_49147441_49152201	27ac_down:3
Cd300e	-0.685876	chr11_114890316_114893236	4me3_down:1
Cd300e	-0.685876	chr11_115188316_115193286	4me3_down:3
Cd300e	-0.685876	chr11_115126446_115136106	4me3_down:2
Cd300e	-0.685876	chr11_114916656_114918476	27ac_down:1
Cd300e	-0.685876	chr11_114897816_114899336	27ac_down:1
Cd14	-0.686357	chr18_36705916_36710946	4me1_down:14
Cd14	-0.686357	chr18_36407136_36425746	4me1_down:8
Cdk1	-0.687674	chr10_69106652_69109652	27ac_down:2
Cdk1	-0.687674	chr10_69111952_69112992	27ac_down:1
Cdk1	-0.687674	chr10_69103852_69105612	27ac_down:2
Setd7	-0.688583	chr3_51756828_51761658	27ac_down:2
Setd7	-0.688583	chr3_51484578_51493348	27ac_down:1
Mast3	-0.689028	chr8_70618361_70620561	4me3_down:28
Mast3	-0.689028	chr8_70617021_70617561	4me3_down:3
Mast3	-0.689028	chr8_70388161_70391201	27ac_down:1
Apbb1ip	-0.690954	chr2_22774520_22782950	4me3_down:1;27ac_down:1
Apbb1ip	-0.690954	chr2_23001720_23015660	4me3_down:2
Apbb1ip	-0.690954	chr2_22783080_22816950	27ac_down:21
Apbb1ip	-0.690954	chr2_23020380_23029700	27ac_down:4
Arid5b	-0.692937	chr10_68005682_68010342	27ac_down:4
Arid5b	-0.692937	chr10_68003312_68005492	27ac_down:2
Kdm6b	-0.693077	chr11_70026988_70030398	27ac_down:3
Scamp3	-0.693224	chr3_88616648_88621098	4me3_down:1
Scamp3	-0.693224	chr3_89184208_89184408	27ac_down:4
Scamp3	-0.693224	chr3_89183948_89184148	27ac_down:2
Scamp3	-0.693224	chr3_89183038_89183408	27ac_down:1
Scamp3	-0.693224	chr3_89184748_89184888	27ac_down:1
Scamp3	-0.693224	chr3_89184518_89184628	27ac_down:1
Eif3b	-0.695034	chr5_140201046_140224246	4me3_down:14
Eif3b	-0.695034	chr5_140173056_140179976	27ac_down:8
Eif3b	-0.695034	chr5_140143176_140143916	27ac_down:2
Eif3b	-0.695034	chr5_140163786_140168726	27ac_down:1
Rac2	-0.69545	chr15_78244720_78250380	4me3_down:15
Rac2	-0.69545	chr15_78326090_78335050	4me3_down:8
Rac2	-0.69545	chr15_78597110_78602690	4me3_down:31
Rac2	-0.69545	chr15_78570800_78572730	27ac_down:10
Rac2	-0.69545	chr15_78543940_78544130	27ac_down:2
Rac2	-0.69545	chr15_78566030_78570730	27ac_down:5
Rac2	-0.69545	chr15_78543650_78543800	27ac_down:1
Tfrc	-0.695951	chr16_32645104_32662484	4me3_down:7
Tfrc	-0.695951	chr16_32400924_32405274	27ac_down:3
Tfrc	-0.695951	chr16_32736444_32747914	27ac_down:1
Ubqln2	-0.696807	chrX_153723937_153725697	4me3_down:4
Gse1	-0.696874	chr8_120114310_120144920	27ac_down:4
Gse1	-0.696874	chr8_120145070_120145200	27ac_down:1
Gse1	-0.696874	chr8_120724540_120726350	27ac_down:1
Gse1	-0.696874	chr8_120151380_120152430	4me1_down:2
Gse1	-0.696874	chr8_120153470_120153920	4me1_down:2
Gse1	-0.696874	chr8_120152630_120153430	4me1_down:2
Gse1	-0.696874	chr8_120150150_120151310	4me1_down:1
Col15a1	-0.697778	chr4_47313158_47321918	27ac_down:13
Col15a1	-0.697778	chr4_47292528_47293178	27ac_down:3
Col15a1	-0.697778	chr4_47307798_47310418	27ac_down:6
Col15a1	-0.697778	chr4_47296118_47297058	27ac_down:4
Col15a1	-0.697778	chr4_47300608_47303868	27ac_down:6
Col15a1	-0.697778	chr4_47310598_47310768	27ac_down:1
Col15a1	-0.697778	chr4_47303928_47306708	27ac_down:2
Col15a1	-0.697778	chr4_47292368_47292468	27ac_down:1
Col15a1	-0.697778	chr4_47293248_47293358	27ac_down:1
Col15a1	-0.697778	chr4_47310888_47312068	27ac_down:1
Col15a1	-0.697778	chr4_47291658_47292318	27ac_down:1
Yipf3	-0.697962	chr17_46606881_46629261	4me3_down:4;27ac_down:6
Csrnp1	-0.698543	chr9_120052342_120061372	27ac_down:13
Npdc1	-0.703079	chr2_25141980_25150570	4me3_down:1
Npdc1	-0.703079	chr2_25587620_25588600	27ac_down:1
Npdc1	-0.703079	chr2_25587010_25587270	27ac_down:1
Npdc1	-0.703079	chr2_25105200_25118350	27ac_down:2
Npdc1	-0.703079	chr2_25423960_25424570	4me1_down:2
Npdc1	-0.703079	chr2_25423330_25423690	4me1_down:1
Arhgdia	-0.703861	chr11_120580386_120581516	4me1_down:5
Arhgdia	-0.703861	chr11_120580046_120580176	4me1_down:1
Arhgdia	-0.703861	chr11_120579426_120579506	4me1_down:1
Arhgdia	-0.703861	chr11_120579576_120579666	4me1_down:1
Mpeg1	-0.704006	chr19_12465920_12466330	4me3_down:1
Mpeg1	-0.704006	chr19_12573580_12577080	4me3_down:23
Mpeg1	-0.704006	chr19_12539110_12543450	4me3_down:4
Card10	-0.705707	chr15_78597110_78602690	4me3_down:5
Card10	-0.705707	chr15_79109420_79114650	27ac_down:2
Card10	-0.705707	chr15_78570800_78572730	27ac_down:2
Card10	-0.705707	chr15_78543650_78543800	27ac_down:1
Card10	-0.705707	chr15_79115170_79117970	27ac_down:1
Card10	-0.705707	chr15_78543940_78544130	27ac_down:1
Aldh18a1	-0.706558	chr19_40636110_40642250	27ac_down:8
Aldh18a1	-0.706558	chr19_40245110_40249610	27ac_down:4
Bak1	-0.706591	chr17_27079655_27083525	27ac_down:8
Bak1	-0.706591	chr17_27083645_27085085	27ac_down:9
Ifit3	-0.706853	chr19_34638740_34640600	4me3_down:7
Ifit3	-0.706853	chr19_34640980_34645290	4me3_down:8;27ac_down:1
Ifit3	-0.706853	chr19_34567730_34570210	4me3_down:6
Ifit3	-0.706853	chr19_34570370_34570950	4me3_down:4
Ifit3	-0.706853	chr19_34599420_34599920	27ac_down:8
Ifit3	-0.706853	chr19_34352330_34354010	27ac_down:2
Ifit3	-0.706853	chr19_34645840_34646790	27ac_down:1
Ifit3	-0.706853	chr19_34598450_34599260	27ac_down:3
Wbp2	-0.708354	chr11_116075876_116076106	4me3_down:1
Wbp2	-0.708354	chr11_116077656_116077936	4me3_down:2
Wbp2	-0.708354	chr11_116076786_116077446	4me3_down:7
Wbp2	-0.708354	chr11_116076166_116076266	4me3_down:1
Wbp2	-0.708354	chr11_116076326_116076436	4me3_down:1
Wbp2	-0.708354	chr11_116076546_116076746	4me3_down:1
Wbp2	-0.708354	chr11_116143466_116144426	27ac_down:5
Wbp2	-0.708354	chr11_116145756_116145826	27ac_down:1
Wbp2	-0.708354	chr11_116144536_116145416	27ac_down:3
Wbp2	-0.708354	chr11_116533366_116533966	27ac_down:1
Wbp2	-0.708354	chr11_116148036_116148116	27ac_down:1
Wbp2	-0.708354	chr11_116145536_116145616	27ac_down:1
Wbp2	-0.708354	chr11_116146006_116146426	27ac_down:1
Wbp2	-0.708354	chr11_116146616_116146696	27ac_down:1
Wbp2	-0.708354	chr11_116148226_116148806	27ac_down:2
Wbp2	-0.708354	chr11_116146826_116147706	27ac_down:2
Wbp2	-0.708354	chr11_115867686_115874686	27ac_down:1
Wbp2	-0.708354	chr11_116147826_116147896	27ac_down:1
Wbp2	-0.708354	chr11_116532686_116533236	27ac_down:1
2900026A02Rik	-0.709267	chr5_113033710_113048270	27ac_down:12
2900026A02Rik	-0.709267	chr5_113002000_113011910	27ac_down:2
2900026A02Rik	-0.709267	chr5_113024090_113025300	27ac_down:1
Dcakd	-0.710017	chr11_103347036_103347796	27ac_down:4
Dcakd	-0.710017	chr11_103345456_103346846	27ac_down:3
Dcakd	-0.710017	chr11_103302306_103322796	27ac_down:4
Dcakd	-0.710017	chr11_103340396_103344506	27ac_down:1
Dcakd	-0.710017	chr11_103344916_103345406	27ac_down:1
Cherp	-0.711664	chr8_72004821_72009041	27ac_down:2
Cherp	-0.711664	chr8_72434981_72436051	27ac_down:2
Cherp	-0.711664	chr8_72581271_72584691	27ac_down:8
Cherp	-0.711664	chr8_72584811_72585861	27ac_down:2
Cherp	-0.711664	chr8_72434881_72434961	27ac_down:1
Gstm3	-0.711726	chr3_107770462_107779482	4me3_down:1
Gstm3	-0.711726	chr3_107727402_107741042	27ac_down:6;4me1_down:6
Gstm3	-0.711726	chr3_107814232_107835722	27ac_down:2
Gstm3	-0.711726	chr3_107743142_107745592	27ac_down:4;4me1_down:4
Gstm3	-0.711726	chr3_107835862_107858472	4me1_down:2
Bcorl1	-0.711796	chrX_48424353_48437753	27ac_down:12
Bcorl1	-0.711796	chrX_48422703_48424073	27ac_down:1
Lpl	-0.713538	chr8_68880831_68887441	4me3_down:1
Lpl	-0.713538	chr8_68925451_68927441	27ac_down:3
Lpl	-0.713538	chr8_68975151_68979091	27ac_down:3
Gm14097	-0.713568	chr2_132603434_132614374	27ac_down:1
Gm14097	-0.713568	chr2_132614484_132617694	27ac_down:1
Pou2f2	-0.714153	chr7_25125611_25132421	4me3_down:17
Pou2f2	-0.714153	chr7_25203931_25211141	27ac_down:17
Pou2f2	-0.714153	chr7_24904491_24907711	4me1_down:3
Pou2f2	-0.714153	chr7_24907931_24908301	4me1_down:3
Pou2f2	-0.714153	chr7_24907751_24907851	4me1_down:1
Susd2	-0.71486	chr10_75241215_75243055	27ac_down:1
Susd2	-0.71486	chr10_75222175_75222985	27ac_down:1
Susd2	-0.71486	chr10_75326345_75332195	4me1_down:2
Cdk18	-0.716259	chr1_132429533_132434093	27ac_down:3
Cdk18	-0.716259	chr1_132028543_132029973	27ac_down:1
Cdk18	-0.716259	chr1_132367943_132380653	4me1_down:17
B930095G15Rik	-0.720992	chr14_121668788_121672188	27ac_down:1
B930095G15Rik	-0.720992	chr14_121123568_121127938	27ac_down:1
B930095G15Rik	-0.720992	chr14_121189158_121193158	27ac_down:3
B930095G15Rik	-0.720992	chr14_121091168_121093438	27ac_down:1
B930095G15Rik	-0.720992	chr14_121308068_121320598	27ac_down:1
B930095G15Rik	-0.720992	chr14_121434498_121438318	27ac_down:2
B930095G15Rik	-0.720992	chr14_121390778_121393988	27ac_down:3
B930095G15Rik	-0.720992	chr14_121197798_121207248	4me1_down:2
Oasl1	-0.721146	chr5_114775321_114785931	4me3_down:1
Oasl1	-0.721146	chr5_114769741_114773311	27ac_down:6
Polr2a	-0.722109	chr11_70026988_70030398	27ac_down:15
Slc9a3r1	-0.723467	chr11_115188316_115193286	4me3_down:15
Slc9a3r1	-0.723467	chr11_115126446_115136106	4me3_down:3
Slc9a3r1	-0.723467	chr11_114897816_114899336	4me3_down:2;27ac_down:2
Slc9a3r1	-0.723467	chr11_114916656_114918476	27ac_down:4
Slc9a3r1	-0.723467	chr11_114928616_114934206	27ac_down:2
Slc9a3r1	-0.723467	chr11_114914856_114915866	27ac_down:1
Reep6	-0.72446	chr10_80070045_80072355	4me3_down:7
Reep6	-0.72446	chr10_80072515_80082605	4me3_down:6
Reep6	-0.72446	chr10_80471375_80477065	27ac_down:33
Reep6	-0.72446	chr10_80895205_80897195	27ac_down:2
Reep6	-0.72446	chr10_80897365_80897835	27ac_down:1
Reep6	-0.72446	chr10_80898105_80898175	27ac_down:1
Reep6	-0.72446	chr10_80898315_80899175	27ac_down:1
Ncl	-0.724769	chr1_86221695_86244565	27ac_down:9
Ncl	-0.724769	chr1_85954625_85961125	27ac_down:3
Zfp750	-0.725018	chr11_121737746_121754216	27ac_down:8;4me1_down:3
Etnk2	-0.72555	chr1_133046423_133065023	4me3_down:3
Etnk2	-0.72555	chr1_133185623_133236093	27ac_down:9
Coro2b	-0.725725	chr9_61945413_61946603	4me3_down:1
Coro2b	-0.725725	chr9_62707053_62709273	27ac_down:2
Coro2b	-0.725725	chr9_62428023_62428943	4me1_down:3
Coro2b	-0.725725	chr9_62426643_62427933	4me1_down:2
Coro2b	-0.725725	chr9_62425923_62426133	4me1_down:1
Coro2b	-0.725725	chr9_62426223_62426523	4me1_down:1
Bmp7	-0.726093	chr2_173234459_173276079	27ac_down:8
Bmp7	-0.726093	chr2_173021419_173022789	4me1_down:9
Bmp7	-0.726093	chr2_173023379_173033499	4me1_down:20
Bmp7	-0.726093	chr2_173022909_173023319	4me1_down:1
Nucb2	-0.726098	chr7_116456606_116458566	27ac_down:4
Btg2	-0.726778	chr1_134163843_134165493	27ac_down:2
Btg2	-0.726778	chr1_134090063_134101233	4me1_down:24
Phpt1	-0.727055	chr2_26016410_26021390	27ac_down:1
Phpt1	-0.727055	chr2_25105200_25118350	27ac_down:1
Phpt1	-0.727055	chr2_25587620_25588600	27ac_down:3
Phpt1	-0.727055	chr2_25587010_25587270	27ac_down:1
Phpt1	-0.727055	chr2_25423960_25424570	4me1_down:1
Phpt1	-0.727055	chr2_25423330_25423690	4me1_down:1
Tef	-0.727797	chr15_81561110_81566450	27ac_down:4
Tef	-0.727797	chr15_82022580_82022800	27ac_down:1
Tef	-0.727797	chr15_82023060_82025500	27ac_down:2
Ttc39a	-0.729145	chr4_109404605_109405725	27ac_down:6
Ttc39a	-0.729145	chr4_109407205_109415645	27ac_down:13
Ttc39a	-0.729145	chr4_109421415_109422445	27ac_down:2
Ttc39a	-0.729145	chr4_109428945_109430855	27ac_down:3
Ttc39a	-0.729145	chr4_109417605_109419945	27ac_down:2
Ttc39a	-0.729145	chr4_109431455_109431535	27ac_down:1
Tsc22d4	-0.73006	chr5_137871242_137871562	4me3_down:1
Tsc22d4	-0.73006	chr5_137831322_137835322	4me3_down:4
Tsc22d4	-0.73006	chr5_137855062_137857152	4me3_down:6
Tsc22d4	-0.73006	chr5_137703012_137710882	27ac_down:21
Tsc22d4	-0.73006	chr5_137493562_137494502	27ac_down:1
Cd300lf	-0.732058	chr11_115188316_115193286	4me3_down:10
Cd300lf	-0.732058	chr11_114897816_114899336	4me3_down:2;27ac_down:3
Cd300lf	-0.732058	chr11_114890316_114893236	4me3_down:3
Cd300lf	-0.732058	chr11_115126446_115136106	4me3_down:1
Cd300lf	-0.732058	chr11_114928616_114934206	27ac_down:2
Cd24a	-0.732157	chr10_43661534_43678504	27ac_down:7
Taf15	-0.732606	chr11_83593078_83601258	4me3_down:8;27ac_down:8
Taf15	-0.732606	chr11_83223648_83224208	4me3_down:2
Taf15	-0.732606	chr11_83224308_83224448	4me3_down:1
Taf15	-0.732606	chr11_83020028_83020568	4me3_down:1
Taf15	-0.732606	chr11_83224628_83225528	4me3_down:3
Taf15	-0.732606	chr11_83017718_83019908	4me3_down:2;4me1_down:2
Taf15	-0.732606	chr11_83065338_83069238	4me3_down:2;27ac_down:2
Taf15	-0.732606	chr11_83704168_83704788	4me3_down:1;27ac_down:1
Taf15	-0.732606	chr11_83616038_83619678	27ac_down:5
Taf15	-0.732606	chr11_83543948_83544978	27ac_down:2
Taf15	-0.732606	chr11_83534138_83535318	27ac_down:1
Taf15	-0.732606	chr11_83117058_83121018	27ac_down:2
Epas1	-0.735985	chr17_86662370_86664890	27ac_down:3
Epas1	-0.735985	chr17_86220370_86241770	27ac_down:1
Mid1	-0.736894	chrX_169990788_170009114	27ac_down:6
Fdps	-0.737084	chr3_89184208_89184408	27ac_down:2
Fdps	-0.737084	chr3_89183948_89184148	27ac_down:2
Fdps	-0.737084	chr3_89183038_89183408	27ac_down:1
Fdps	-0.737084	chr3_89184748_89184888	27ac_down:1
Fdps	-0.737084	chr3_89184518_89184628	27ac_down:1
Fkbp5	-0.737197	chr17_28207935_28213225	4me3_down:7
Fkbp5	-0.737197	chr17_28205885_28207775	4me3_down:1
Fkbp5	-0.737197	chr17_28500245_28519735	27ac_down:55
Fkbp5	-0.737197	chr17_27996045_27998135	27ac_down:2
Fkbp5	-0.737197	chr17_27993245_27995925	27ac_down:1
Fkbp5	-0.737197	chr17_28008425_28038075	27ac_down:5
Fkbp5	-0.737197	chr17_28519815_28520855	27ac_down:3
Fkbp5	-0.737197	chr17_28821585_28823965	27ac_down:2
Fkbp5	-0.737197	chr17_28824065_28828335	27ac_down:2
Fkbp5	-0.737197	chr17_28476945_28478085	27ac_down:2
Sf3a2	-0.737249	chr10_80070045_80072355	4me3_down:2
Sf3a2	-0.737249	chr10_80471375_80477065	27ac_down:20
Sf3a2	-0.737249	chr10_80895205_80897195	27ac_down:4
Sf3a2	-0.737249	chr10_80897365_80897835	27ac_down:1
Sf3a2	-0.737249	chr10_80898105_80898175	27ac_down:1
Sf3a2	-0.737249	chr10_80947325_80948615	27ac_down:1
Sf3a2	-0.737249	chr10_80898315_80899175	27ac_down:2
Zmiz1	-0.741922	chr14_25357294_25388514	27ac_down:18
Zmiz1	-0.741922	chr14_25217114_25233034	27ac_down:14
Zmiz1	-0.741922	chr14_25337714_25356724	27ac_down:9
Zmiz1	-0.741922	chr14_25242754_25246914	27ac_down:4
Loxl2	-0.74307	chr14_69777813_69780503	27ac_down:4
Loxl2	-0.74307	chr14_69690263_69692243	27ac_down:4
Loxl2	-0.74307	chr14_69780573_69782223	27ac_down:5
Loxl2	-0.74307	chr14_69692423_69693033	27ac_down:2
Hspa1b	-0.743351	chr17_35215345_35220165	4me3_down:9
Hspa1b	-0.743351	chr17_34655065_34660525	4me3_down:2
Hspa1b	-0.743351	chr17_35173275_35175965	4me3_down:1
Prelp	-0.748061	chr1_134163843_134165493	27ac_down:2
Prelp	-0.748061	chr1_134090063_134101233	4me1_down:10
Ttyh3	-0.751069	chr5_140201046_140224246	4me3_down:3
Ttyh3	-0.751069	chr5_140173056_140179976	27ac_down:2
Ttyh3	-0.751069	chr5_140755246_140757706	27ac_down:1
Lad1	-0.752677	chr1_136127783_136129383	4me3_down:1
Lad1	-0.752677	chr1_135739503_135745253	27ac_down:5
Lad1	-0.752677	chr1_135506533_135519473	27ac_down:7
Lad1	-0.752677	chr1_135177673_135220273	27ac_down:1
Lad1	-0.752677	chr1_136221123_136225333	27ac_down:1
Lad1	-0.752677	chr1_135628763_135642013	4me1_down:22
Cib3	-0.754089	chr8_72434981_72436051	27ac_down:2
Cib3	-0.754089	chr8_72434881_72434961	27ac_down:1
Slco2a1	-0.755843	chr9_102838390_102854550	27ac_down:1
Gatad2b	-0.757014	chr3_90424078_90432798	27ac_down:8
Gatad2b	-0.757014	chr3_90603798_90604988	27ac_down:3
Gatad2b	-0.757014	chr3_90605148_90605738	27ac_down:2
Fbrs	-0.757046	chr7_127297716_127299526	4me3_down:3
Fbrs	-0.757046	chr7_127296516_127297616	4me3_down:2
Fbrs	-0.757046	chr7_127801936_127802006	4me1_down:1
Fbrs	-0.757046	chr7_127802106_127802226	4me1_down:2
Fbrs	-0.757046	chr7_127801246_127801456	4me1_down:1
Fbrs	-0.757046	chr7_127801616_127801826	4me1_down:1
Fbrs	-0.757046	chr7_127803726_127806836	4me1_down:3
Fbrs	-0.757046	chr7_127802396_127802776	4me1_down:1
Trp53inp2	-0.757835	chr2_155803184_155807394	27ac_down:2
Trp53inp2	-0.757835	chr2_155676654_155684814	27ac_down:4
Trp53inp2	-0.757835	chr2_155314594_155322344	27ac_down:5
Gpsm3	-0.759065	chr17_34306045_34310555	4me3_down:3;27ac_down:3
Gpsm3	-0.759065	chr17_34655065_34660525	4me3_down:3
Gpsm3	-0.759065	chr17_35173275_35175965	4me3_down:1
Gpsm3	-0.759065	chr17_34614995_34615165	27ac_down:1
Gpsm3	-0.759065	chr17_34614775_34614875	27ac_down:1
Tgm1	-0.759583	chr14_55782023_55784173	4me3_down:5
Tgm1	-0.759583	chr14_55781733_55781833	4me3_down:1
Tgm1	-0.759583	chr14_55780323_55780813	4me3_down:1
Tgm1	-0.759583	chr14_55854423_55862943	4me3_down:2
Sstr2	-0.760516	chr11_113532426_113548426	27ac_down:5
Igfbp1	-0.761398	chr11_7144867_7145037	4me3_down:1
Igfbp1	-0.761398	chr11_7150897_7160197	4me3_down:3
Igfbp1	-0.761398	chr11_7145137_7146507	4me3_down:1
Igfbp1	-0.761398	chr11_7150207_7150767	4me3_down:1
Entpd2	-0.761496	chr2_25141980_25150570	4me3_down:2
Entpd2	-0.761496	chr2_25587620_25588600	27ac_down:1
Entpd2	-0.761496	chr2_25105200_25118350	27ac_down:1
Entpd2	-0.761496	chr2_25587010_25587270	27ac_down:1
Entpd2	-0.761496	chr2_25423960_25424570	4me1_down:2
Entpd2	-0.761496	chr2_25423330_25423690	4me1_down:1
Bhlhe40	-0.761655	chr6_108682266_108708086	27ac_down:9
Bhlhe40	-0.761655	chr6_108089846_108097026	27ac_down:1
Slc7a1	-0.763572	chr5_148511994_148521244	27ac_down:7
Slc7a1	-0.763572	chr5_148630874_148636294	27ac_down:12
Slc7a1	-0.763572	chr5_148530474_148537604	27ac_down:4
Slc7a1	-0.763572	chr5_148487284_148497344	27ac_down:18
Slc7a1	-0.763572	chr5_148509354_148511884	27ac_down:3
Trp53	-0.764003	chr11_70026988_70030398	27ac_down:8
Prrc2a	-0.76585	chr17_35173275_35175965	4me3_down:1
Prrc2a	-0.76585	chr17_35215345_35220165	4me3_down:18
Prrc2a	-0.76585	chr17_34614995_34615165	27ac_down:1
Prrc2a	-0.76585	chr17_34614775_34614875	27ac_down:1
Ints9	-0.766897	chr14_64960633_64969413	27ac_down:2
Ints9	-0.766897	chr14_64808393_64818613	27ac_down:5
Ints9	-0.766897	chr14_64833553_64835923	27ac_down:2
Ints9	-0.766897	chr14_64903313_64910353	27ac_down:1
Rhog	-0.76787	chr7_102397866_102400546	27ac_down:3
Rhog	-0.76787	chr7_102001656_102007476	27ac_down:5
Rhog	-0.76787	chr7_101953786_101957366	27ac_down:2
Klf13	-0.76809	chr7_63982334_63995744	27ac_down:19
Klf13	-0.76809	chr7_63873394_63886344	27ac_down:5
Card6	-0.768594	chr15_5235220_5242260	4me3_down:6
Card6	-0.768594	chr15_5345770_5350920	27ac_down:2
Card6	-0.768594	chr15_5445060_5448650	27ac_down:4
Clmn	-0.768702	chr12_104895550_104898850	27ac_down:6
Clmn	-0.768702	chr12_104899140_104905390	27ac_down:2
Clmn	-0.768702	chr12_104737300_104745240	27ac_down:1
H19	-0.769684	chr7_142383535_142385455	4me3_down:1
H19	-0.769684	chr7_142380985_142382585	4me3_down:1
H19	-0.769684	chr7_142460965_142471835	27ac_down:6
H19	-0.769684	chr7_142472355_142477005	27ac_down:1
H19	-0.769684	chr7_142442495_142443165	27ac_down:1
Ccdc97	-0.770485	chr7_25705071_25711111	4me3_down:25
Ccdc97	-0.770485	chr7_25125611_25132421	4me3_down:1
Ccdc97	-0.770485	chr7_25787511_25788411	27ac_down:10
Ccdc97	-0.770485	chr7_25786001_25786881	27ac_down:1
Ccdc97	-0.770485	chr7_25786981_25787281	27ac_down:1
Ccdc97	-0.770485	chr7_25203931_25211141	27ac_down:1
Aldh1b1	-0.772166	chr4_45948848_45949448	4me3_down:4
Aldh1b1	-0.772166	chr4_45949578_45950588	4me3_down:2
Aldh1b1	-0.772166	chr4_45785138_45789018	27ac_down:2
Pcbp1	-0.772488	chr6_86229476_86236406	27ac_down:1
Pcbp1	-0.772488	chr6_86896266_86920166	27ac_down:1
Pcbp1	-0.772488	chr6_86882516_86888766	27ac_down:8
Armcx4	-0.774011	chrX_134757791_134758071	27ac_down:2
Armcx4	-0.774011	chrX_134756501_134757261	27ac_down:1
Armcx4	-0.774011	chrX_134757341_134757621	27ac_down:1
Slc13a5	-0.77564	chr11_72457338_72458628	4me3_down:2
Slc13a5	-0.77564	chr11_72459048_72474698	4me3_down:1
Slc13a5	-0.77564	chr11_72458698_72458898	4me3_down:1
Wiz	-0.775856	chr17_32537195_32539515	4me3_down:6
Wiz	-0.775856	chr17_32536115_32536995	4me3_down:2
Wiz	-0.775856	chr17_32399425_32403005	27ac_down:8
Wiz	-0.775856	chr17_32021065_32022765	27ac_down:1
Wiz	-0.775856	chr17_32104415_32120885	27ac_down:16
Wiz	-0.775856	chr17_32229735_32242545	27ac_down:2
Wiz	-0.775856	chr17_32121625_32123395	27ac_down:1
Agap2	-0.776007	chr10_127102884_127105644	27ac_down:3
Agap2	-0.776007	chr10_127096364_127096624	27ac_down:1
Agap2	-0.776007	chr10_127096734_127096914	27ac_down:1
Agap2	-0.776007	chr10_127100274_127102814	27ac_down:6
Agap2	-0.776007	chr10_127099454_127099604	27ac_down:1
Agap2	-0.776007	chr10_127099984_127100084	27ac_down:1
Agap2	-0.776007	chr10_127093164_127094254	27ac_down:2
Agap2	-0.776007	chr10_127099704_127099884	27ac_down:1
Agap2	-0.776007	chr10_127098914_127099394	27ac_down:1
Agap2	-0.776007	chr10_127097074_127097924	27ac_down:1
Cyb561	-0.776443	chr11_105935906_105936176	27ac_down:2
Cyb561	-0.776443	chr11_106097106_106109576	27ac_down:5
Cyb561	-0.776443	chr11_105936276_105936546	27ac_down:1
Cyb561	-0.776443	chr11_105936646_105937626	27ac_down:2
Cyb561	-0.776443	chr11_105937836_105944106	27ac_down:3
Cyb561	-0.776443	chr11_105935566_105935746	27ac_down:1
Slc25a23	-0.777361	chr17_57076997_57078627	4me3_down:10
Slc25a23	-0.777361	chr17_57214827_57215107	4me3_down:1
Slc25a23	-0.777361	chr17_57192937_57193847	4me3_down:1;27ac_down:1
Enho	-0.777372	chr4_41553017_41559587	4me3_down:5
Dusp8	-0.779288	chr7_142380985_142382585	4me3_down:1
Dusp8	-0.779288	chr7_142383535_142385455	4me3_down:1
Dusp8	-0.779288	chr7_142382705_142383415	4me3_down:1
Dusp8	-0.779288	chr7_142443655_142443905	27ac_down:1
Dusp8	-0.779288	chr7_142444075_142444205	27ac_down:1
Dusp8	-0.779288	chr7_142460965_142471835	27ac_down:1
Dusp8	-0.779288	chr7_142472355_142477005	27ac_down:1
Dusp8	-0.779288	chr7_142443425_142443565	27ac_down:1
Dusp8	-0.779288	chr7_142443205_142443295	27ac_down:1
Dusp8	-0.779288	chr7_142442495_142443165	27ac_down:1
Slc41a3	-0.779573	chr6_90612176_90619236	27ac_down:14
Slc41a3	-0.779573	chr6_90619636_90624806	27ac_down:11
Slc41a3	-0.779573	chr6_90624916_90626376	27ac_down:7
Slc41a3	-0.779573	chr6_90776306_90809766	27ac_down:2
Tlr7	-0.781645	chrX_167323648_167329998	27ac_down:2
Tlr7	-0.781645	chrX_167163768_167185488	27ac_down:4
Tlr7	-0.781645	chrX_167030798_167033908	27ac_down:2
Rbp1	-0.782396	chr9_98425631_98434121	27ac_down:18
Rbp1	-0.782396	chr9_98444691_98446291	27ac_down:1
Rbp1	-0.782396	chr9_98425051_98425451	27ac_down:2
Inf2	-0.783366	chr12_112760619_112762519	4me3_down:4
Inf2	-0.783366	chr12_112662299_112671509	27ac_down:7
Inf2	-0.783366	chr12_113020049_113044219	27ac_down:7
Sqle	-0.783458	chr15_59539665_59591695	4me3_down:4
Sqle	-0.783458	chr15_59725285_59732715	27ac_down:3
Sqle	-0.783458	chr15_59732765_59735015	27ac_down:1
Sqle	-0.783458	chr15_59361235_59362335	27ac_down:2
Sqle	-0.783458	chr15_59718285_59724165	27ac_down:1
Sqle	-0.783458	chr15_58742355_58750995	27ac_down:1
Sqle	-0.783458	chr15_59360575_59361115	27ac_down:2
Cxcl14	-0.786831	chr13_56348949_56352899	27ac_down:6
Cxcl14	-0.786831	chr13_56370709_56371769	27ac_down:2
Lyve1	-0.789657	chr7_110859756_110862776	4me3_down:2
Lyve1	-0.789657	chr7_110853986_110859356	4me3_down:1
Lyve1	-0.789657	chr7_110905096_110905426	27ac_down:1
Lyve1	-0.789657	chr7_110902276_110904976	27ac_down:4
Lyve1	-0.789657	chr7_110700576_110718966	27ac_down:6
Lyve1	-0.789657	chr7_110778016_110788606	27ac_down:11
Lyve1	-0.789657	chr7_110905546_110905696	27ac_down:1
Camta2	-0.790256	chr11_70283238_70290048	27ac_down:1
Col4a2	-0.791027	chr8_11267650_11312510	4me3_down:32;27ac_down:6
Col4a2	-0.791027	chr8_11313680_11354270	4me3_down:21;27ac_down:7
Col4a2	-0.791027	chr8_11313110_11313410	4me3_down:3
Col4a2	-0.791027	chr8_11313500_11313620	4me3_down:1
Col4a2	-0.791027	chr8_11359200_11390440	27ac_down:7
Col4a2	-0.791027	chr8_11414030_11414740	27ac_down:4
Col4a2	-0.791027	chr8_11410090_11413970	27ac_down:13
Col4a2	-0.791027	chr8_11414800_11415360	27ac_down:1
Col4a2	-0.791027	chr8_10987010_11004460	27ac_down:4
Col4a2	-0.791027	chr8_11451520_11453970	4me1_down:2
Col4a2	-0.791027	chr8_11454520_11467000	4me1_down:6
Mx1	-0.791265	chr16_97460943_97462693	4me3_down:3;27ac_down:3
Mx1	-0.791265	chr16_97471223_97475243	27ac_down:5
Mx1	-0.791265	chr16_97599313_97611013	27ac_down:2
Mx1	-0.791265	chr16_97596953_97599253	27ac_down:2
Mx1	-0.791265	chr16_97514933_97516593	27ac_down:2
Mx1	-0.791265	chr16_97478403_97481783	27ac_down:4
Mx1	-0.791265	chr16_97476423_97478343	27ac_down:2
Mx1	-0.791265	chr16_97590933_97591423	27ac_down:1
Mx1	-0.791265	chr16_97475353_97476373	27ac_down:1
Lonrf1	-0.792818	chr8_36104346_36106266	27ac_down:4
Lonrf1	-0.792818	chr8_36123166_36124616	4me1_down:3
Lonrf1	-0.792818	chr8_36121406_36122536	4me1_down:1
Rere	-0.795305	chr4_149879341_149896281	4me3_down:2
Rere	-0.795305	chr4_150315231_150317071	27ac_down:1
Rere	-0.795305	chr4_150550851_150570211	27ac_down:6
Rere	-0.795305	chr4_150470391_150477361	27ac_down:2
Rere	-0.795305	chr4_150485691_150498891	27ac_down:3
Rere	-0.795305	chr4_149935131_149947041	27ac_down:1
Chaf1b	-0.795971	chr16_93910535_93913575	27ac_down:2
Chaf1b	-0.795971	chr16_93787515_93793085	27ac_down:1
Chaf1b	-0.795971	chr16_93798985_93799905	27ac_down:5
Chaf1b	-0.795971	chr16_93767725_93767995	27ac_down:1
Hnf1b	-0.796329	chr11_83593078_83601258	4me3_down:1;27ac_down:1
Hnf1b	-0.796329	chr11_83704168_83704788	4me3_down:1;27ac_down:1
Hnf1b	-0.796329	chr11_83912098_83916498	27ac_down:2
Fam98b	-0.800134	chr2_118005614_118016744	27ac_down:2
Fam98b	-0.800134	chr2_117079074_117083554	27ac_down:2
Phc1	-0.800355	chr6_122800322_122803532	27ac_down:1
1810055G02Rik	-0.800791	chr19_3809420_3812680	27ac_down:4
1810055G02Rik	-0.800791	chr19_4238650_4241330	27ac_down:1
1810055G02Rik	-0.800791	chr19_4121570_4125720	4me1_down:1
Cdc42ep1	-0.800824	chr15_78597110_78602690	4me3_down:9
Cdc42ep1	-0.800824	chr15_79109420_79114650	27ac_down:5
Cdc42ep1	-0.800824	chr15_78570800_78572730	27ac_down:2
Cdc42ep1	-0.800824	chr15_79115170_79117970	27ac_down:2
Cdc42ep1	-0.800824	chr15_78566030_78570730	27ac_down:2
Cdc42ep1	-0.800824	chr15_78543940_78544130	27ac_down:1
Slc43a1	-0.803753	chr2_85054343_85058123	27ac_down:2
Slc16a6	-0.80539	chr11_109731796_109733016	4me3_down:1
Slc16a6	-0.80539	chr11_109733056_109733646	4me3_down:1
Slc16a6	-0.80539	chr11_109409746_109415936	27ac_down:3
Blnk	-0.810213	chr19_41332340_41349730	4me3_down:1
Blnk	-0.810213	chr19_41329550_41332200	4me3_down:1
Blnk	-0.810213	chr19_40636110_40642250	27ac_down:2
Nfic	-0.815331	chr10_81249255_81249675	27ac_down:1
Nfic	-0.815331	chr10_81248525_81248975	27ac_down:1
Nfic	-0.815331	chr10_81247385_81248385	27ac_down:1
Top2a	-0.818986	chr11_98349166_98349986	4me3_down:2
Crtc2	-0.820821	chr3_90424078_90432798	27ac_down:6
Crtc2	-0.820821	chr3_90603798_90604988	27ac_down:2
Crtc2	-0.820821	chr3_90605148_90605738	27ac_down:1
Sox7	-0.822323	chr14_64183963_64188693	27ac_down:2
Sox7	-0.822323	chr14_64134783_64142003	27ac_down:2
Sox7	-0.822323	chr14_63919853_63925163	4me1_down:5
Tnfrsf1b	-0.822382	chr4_145111037_145114697	27ac_down:6
Tat	-0.825959	chr8_109868710_109874360	27ac_down:1
Spred2	-0.826037	chr11_20051857_20054697	27ac_down:2
Spred2	-0.826037	chr11_19933647_19970497	27ac_down:9
Midn	-0.827735	chr10_80070045_80072355	4me3_down:15
Midn	-0.827735	chr10_80072515_80082605	4me3_down:7
Midn	-0.827735	chr10_79631335_79637445	4me3_down:2
[truncated: 512 more rows]
