# Supplementary material for: Plasticity of Epigenomic and Transcriptomic Aging Reveals Common Targets for Reprogramming by Environmental Exposures
Source: Research Square preprint supplement (doi:10.21203/rs.3.rs-7368222/v1), 2025-09-19
Supplement: Supplementary file 5 [file 74e058c2492fd31e0e8085da.xlsx]

## Sheet: 7a_BPA.hi 10mg
Supplemental Table 7a: Enhancer peaks linked to DEGs for 'BPA.hi 10mg over Veh' comparison (Figure 5)
Number of peaks in enhancers (for each histone mark) linked to DEGs (Enhancer Atlas, merged anchors)
Genes	Peak count for H3K27ac up peaks	Peak count for H3K4me1 up peaks	Peak count for H3K4me3 up peaks	M_liver_5mo_BPA.hi 10mg.over.VEH	Peak count for H3K27ac down peaks	Peak count for H3K4me1 down peaks	Peak count for H3K4me3 down peaks
Cyp2a4	0	0	0	4.28323	0	0	0
Knstrn	0	0	0	1.60017	0	0	0
Cx3cr1	0	0	0	1.58484	0	0	0
Krt23	2	0	4	1.51089	0	0	0
Cyp2b9	0	0	0	1.4769	0	0	0
Sox4	8	2	0	1.47573	0	0	0
Themis	0	0	0	1.43341	0	0	0
Ddr1	0	12	0	1.3843	0	0	0
Gstm3	2	0	0	1.37394	0	0	0
Ehf	1	0	0	1.33141	0	0	0
Mthfd1l	0	1	0	1.31028	0	0	0
Eln	1	0	0	1.29325	0	0	0
Loxl1	1	0	2	1.29132	0	0	0
Prom1	13	0	18	1.27357	0	0	0
Ttc39a	20	0	0	1.26043	0	0	0
Cdc20	0	0	0	1.25429	0	7	0
Ckap2	0	2	0	1.25233	2	0	0
Tpx2	0	0	0	1.24454	0	0	0
Mmp2	1	7	0	1.23753	0	0	0
Ltbp2	0	15	0	1.23196	0	0	0
Fbln1	0	0	2	1.18822	0	0	0
Col4a5	0	0	0	1.18588	0	0	0
Knl1	0	0	0	1.18175	0	0	0
Tspan8	0	0	0	1.18165	0	0	0
Krt19	0	4	0	1.17936	0	0	0
Cdk1	3	0	0	1.17552	0	0	0
Mtcl1	0	0	0	1.16812	0	0	0
Epcam	20	0	0	1.16711	0	0	0
Trip13	0	4	0	1.16524	0	0	0
Osbpl3	6	0	0	1.16488	0	0	0
Slpi	0	0	0	1.1647	0	0	0
Fam83a	0	0	0	1.16186	0	0	0
Gldn	0	0	0	1.15307	0	0	0
Lamc3	0	0	0	1.15092	0	0	0
Dync2li1	0	0	0	1.14701	0	0	0
Rad51	1	0	2	1.14335	0	0	0
Kif20a	3	0	0	1.13882	0	0	0
Gpx7	0	0	0	1.13597	0	0	0
Atp6v0e2	0	0	0	1.13488	0	0	0
Mrc2	0	0	0	1.13389	0	0	0
St14	14	0	0	1.12054	0	0	0
Abcb1a	6	0	0	1.11998	0	0	0
Gprc5b	20	0	0	1.11698	0	0	0
Gm33543	0	0	0	1.11617	0	0	0
Mmp23	1	0	0	1.10845	0	0	0
Scara3	6	3	0	1.10617	0	0	2
Gsta2	0	0	0	1.10604	0	0	0
Hmmr	0	0	0	1.10459	0	0	0
Aldh1b1	0	0	0	1.10184	0	0	0
Slc5a1	0	0	0	1.09974	0	0	0
Col1a1	28	33	0	1.09861	0	0	0
Col3a1	0	0	0	1.09557	0	0	0
Mmd2	0	0	0	1.08825	0	0	0
Cyp2a5	0	0	0	1.08526	0	0	0
Col8a1	4	0	0	1.08352	0	0	0
Col5a2	0	0	0	1.07672	0	0	0
Atf3	4	4	0	1.07327	3	0	0
Dsn1	0	1	0	1.07025	0	0	0
Clec2h	0	1	0	1.06709	0	0	0
Ube2c	0	4	0	1.05742	0	0	0
Cdkn2c	24	0	0	1.05145	0	0	0
Cpxm1	6	0	0	1.04849	0	0	0
Kcnma1	0	0	4	1.03734	0	0	0
Svep1	0	0	0	1.03073	0	0	0
S100a6	6	0	0	1.02936	0	0	0
Ppp1r3g	0	0	0	1.02815	0	0	0
Mmp12	0	0	0	1.01672	0	0	0
Cdca3	12	5	0	1.0107	0	0	0
Ect2	1	0	0	1.00232	0	0	0
Mapk8ip1	2	7	0	1.00143	0	0	0
Emp2	2	3	0	0.995574	0	0	0
Smpd3	12	3	0	0.994717	0	0	0
Bmper	0	3	0	0.992123	0	0	0
Ripor2	0	0	0	0.986704	0	0	0
Unc5b	0	27	0	0.983948	0	0	0
Ccna2	0	0	0	0.98214	0	0	0
Sh3pxd2b	0	0	0	0.978759	0	0	0
Cd24a	0	5	0	0.97847	0	0	0
Col1a2	0	0	0	0.974189	0	0	0
Racgap1	3	5	0	0.974073	0	0	0
Col16a1	0	0	6	0.968407	0	0	0
Cib3	0	0	0	0.96664	0	0	0
Adamtsl2	0	0	0	0.960059	0	0	0
Fam180a	0	0	0	0.955899	0	0	0
Birc5	0	10	0	0.955886	0	0	0
Evc	0	0	0	0.952653	0	0	0
Syt7	3	0	0	0.951093	0	0	0
Pde10a	0	0	0	0.948101	0	0	0
Usp2	0	0	0	0.945951	0	0	0
Arl4d	0	0	0	0.941595	0	0	0
Spp1	5	0	0	0.940314	0	0	0
Cbx6	0	19	0	0.939393	0	0	0
Emp1	0	0	0	0.936094	0	0	0
Cip2a	0	0	0	0.935307	0	0	0
Crispld2	0	4	0	0.930209	0	0	0
Lama2	0	0	0	0.923019	0	0	0
Ntrk2	0	0	0	0.921986	0	0	0
Cd34	16	0	0	0.91525	0	0	0
Slc41a3	27	0	0	0.905487	0	0	0
Ifi27l2b	0	0	0	0.904866	0	0	0
Capg	22	0	0	0.903148	0	0	0
Ugt1a9	0	0	0	0.90252	0	0	0
Col6a3	0	0	0	0.901339	0	0	0
Nlgn2	3	0	0	0.897598	0	0	0
Tcf21	0	0	0	0.893149	0	0	0
Adamts2	5	0	0	0.888193	0	0	0
Myc	17	6	0	0.886269	0	0	0
Adamts5	1	0	0	0.883607	0	0	0
Cirbp	6	0	4	0.880294	0	0	0
Tm4sf1	0	0	0	0.877431	0	0	0
Hba-a2	0	0	0	0.876666	0	0	0
Nrep	0	0	0	0.871903	0	0	0
Cd63	20	5	0	0.870872	0	0	0
Csad	1	3	0	0.862854	0	0	0
Olfml3	5	0	0	0.860322	0	0	0
Ano1	0	20	0	0.857409	0	0	0
Rragd	8	0	0	0.85342	0	0	0
Epop	0	0	0	0.851173	0	0	0
Itga8	6	0	0	0.844333	0	0	0
Uap1l1	0	2	0	0.844314	0	0	0
Adamts9	4	0	0	0.841284	0	0	0
Tk1	0	12	0	0.836275	0	0	0
Nqo1	1	0	0	0.828841	0	0	0
Per3	0	0	0	0.824171	0	0	0
Bbc3	0	24	0	0.823455	0	0	0
Cyp3a59	0	0	0	0.814531	0	0	0
Fstl1	0	0	0	0.811344	0	0	0
Bcam	0	1	0	0.810247	0	0	0
Tmem86a	0	0	0	0.80803	0	0	0
Rab3d	1	2	0	0.80001	1	1	0
Bicc1	0	2	0	0.791175	0	0	0
Lum	0	0	0	0.789737	0	0	0
Ltbp3	0	0	0	0.788955	0	0	0
Rorc	0	0	0	0.786137	0	0	0
Tspan3	7	0	0	0.785453	0	0	0
Hexb	13	0	0	0.778192	0	0	0
Col6a1	4	0	0	0.777704	0	0	0
Mki67	0	0	0	0.772867	0	0	0
Dpt	0	0	0	0.771439	0	0	0
Dkk3	5	0	0	0.769121	0	0	0
Flvcr2	0	0	0	0.768979	0	0	0
Bst2	9	0	0	0.767889	0	0	0
Islr	11	0	2	0.764736	0	0	0
Scd2	0	0	0	0.764636	1	0	0
Slco1a4	0	0	0	0.762189	0	0	0
Tm4sf4	0	0	0	0.757588	0	0	0
Nudt18	17	0	8	0.754928	0	0	0
Ajuba	0	0	0	0.753876	0	0	0
Upp2	0	0	0	0.751747	0	0	0
Ciart	0	0	0	0.740063	0	0	0
Ltbp1	0	0	0	0.738609	0	0	0
Etnppl	0	0	0	0.737339	0	0	0
Slc5a6	0	0	0	0.734768	0	0	0
Trib3	0	0	0	0.734013	0	0	0
Cyp7a1	0	0	0	0.733117	0	0	0
Wee1	0	0	0	0.728143	0	0	0
Mgst3	3	0	0	0.727668	0	0	0
Hsd17b6	0	0	0	0.726762	0	0	0
Fbn1	0	0	0	0.726407	0	0	0
Cdc42ep5	0	0	0	0.721028	0	0	0
Fbln5	4	1	0	0.717844	0	0	0
Ddit4	0	0	0	0.710074	0	0	0
Col6a2	4	0	0	0.701763	0	0	0
S1pr2	1	0	0	0.70147	0	0	0
Lars2	9	0	0	0.699603	0	0	0
Scand1	1	0	0	0.698068	0	0	0
Nek2	4	7	0	0.697207	0	0	0
Noct	0	0	0	0.691186	0	0	0
Abcg5	0	0	0	0.68889	0	0	0
mt-Nd3	0	0	0	0.684908	0	0	0
Rhoc	0	0	0	0.68465	0	0	0
Pygb	0	0	0	0.684358	0	0	0
Sparcl1	2	0	0	0.67898	0	0	0
Smoc2	0	0	0	0.674809	0	0	0
Bmf	1	0	0	0.673409	0	0	0
Htatip2	1	0	0	0.673101	0	0	0
Dbp	15	2	0	0.671655	0	0	0
Rundc3a	0	0	0	0.657522	0	0	0
Col5a1	0	0	0	0.654876	0	0	0
Lpl	3	0	0	0.648965	0	0	0
Mfge8	0	0	0	0.645509	3	0	0
Csrp2	0	0	0	0.64217	0	0	0
Pdgfra	0	0	0	0.631885	0	0	0
Rhob	19	0	0	0.631252	0	0	0
Ftl1	12	2	0	0.627787	0	0	0
Robo1	0	0	0	0.622838	0	0	0
Gsn	0	0	0	0.620776	0	0	0
Timp2	0	0	0	0.619206	0	0	0
Anxa2	4	2	0	0.618406	0	0	0
Serpinh1	0	0	0	0.617504	0	0	0
Tagln2	23	0	0	0.614574	0	0	0
Ephx1	0	2	0	0.613678	0	0	0
Akr1c19	0	0	0	0.591112	0	0	0
F11r	4	6	7	0	0	0	0
Ddrgk1	3	0	0	0	0	0	0
Nme4	1	2	0	0	1	1	0
Rnpep	1	10	0	0	0	0	0
Gm4875	3	0	0	0	0	0	0
Ttll13	1	11	0	0	0	0	0
Pnpla7	0	3	0	0	0	0	0
Gm17328	0	2	0	0	0	0	0
Tbc1d15	13	0	0	0	0	0	0
4930579G18Rik	8	0	0	0	0	0	0
Tspan32	0	16	0	0	0	0	0
Plekhg6	5	2	0	0	0	0	0
Traf7	10	0	0	0	0	0	0
Tomm6	15	1	0	0	0	0	0
BC034090	3	0	0	0	0	0	0
Gsk3a	2	10	0	0	0	0	0
Megf8	1	6	0	0	0	0	0
Kcnn3	2	0	3	0	0	0	0
Gm16365	5	0	0	0	0	0	0
9430002A10Rik	14	0	0	0	0	0	0
Gm10602	0	1	0	0	0	0	0
Cdc7	20	0	0	0	0	0	0
Atxn2	0	9	0	0	0	0	0
Kcnh4	4	0	0	0	1	0	0
Sh3d19	5	0	0	0	0	0	0
Emx1	0	1	0	0	0	0	0
Clec2f	3	0	0	0	0	0	0
Gm17270	3	0	0	0	0	0	0
AU040320	1	0	0	0	0	0	0
Fktn	3	0	0	0	0	0	0
Gm16120	0	1	0	0	0	0	0
Scarb2	6	0	0	0	0	0	0
Acox1	1	2	0	0	0	0	0
Ifngr2	0	6	0	0	0	0	0
Gm13542	0	1	0	0	0	0	0
Cxcl12	3	0	0	0	0	0	0
Bend3	7	2	0	0	0	0	0
Crebl2	1	4	0	0	0	0	0
Lass2	7	5	0	0	0	0	0
Gm12511	0	1	0	0	0	0	0
A430110N23Rik	8	0	0	0	0	0	0
Gm15895	3	0	0	0	0	0	0
Ccl3	5	0	0	0	0	0	0
Gm12311	1	0	0	0	0	0	0
Qrich2	1	0	0	0	0	0	0
Gm9307	0	1	0	0	0	0	0
Pigv	18	16	0	0	0	0	0
Cd44	0	3	0	0	0	0	0
Zfp111	0	13	0	0	0	0	0
Gm16576	0	2	0	0	0	0	0
Gnai2	0	15	0	0	0	0	0
Mrpl41	0	3	0	0	0	0	0
Pla2g4f	1	8	0	0	0	0	0
Rbm24	0	0	4	0	0	0	0
Nedd9	13	18	0	0	0	0	0
Gm13802	2	0	0	0	0	0	0
Zdhhc14	0	3	0	0	0	0	0
Enoph1	0	0	0	0	1	0	0
SNORA76	1	1	0	0	0	0	0
Gm13529	0	8	0	0	0	0	0
Zmym6	1	0	0	0	0	0	0
Slc1a1	1	0	0	0	0	0	0
Tomm40	0	4	0	0	0	0	0
Pax7	0	3	0	0	0	0	0
Gm6139	0	1	0	0	0	0	0
Slamf9	19	0	0	0	0	0	0
Gm11476	1	2	0	0	0	0	0
Fam134a	4	5	0	0	0	0	0
1110008E08Rik	1	0	0	0	0	0	0
2310004N24Rik	2	2	0	0	0	0	0
Cdh2	3	0	0	0	0	0	0
Hyal5	1	0	0	0	0	0	0
Gm13187	5	0	0	0	0	0	0
4930544D05Rik	1	0	0	0	0	0	0
Cacna2d2	0	8	0	0	0	0	0
Gatad2b	6	0	0	0	0	0	0
Cops4	12	0	0	0	3	0	0
Nt5c3l	3	5	0	0	0	0	0
Pstpip2	0	0	0	0	1	0	0
Trpm4	1	0	0	0	0	0	0
Zc3h6	3	0	0	0	0	0	0
Safb2	26	0	0	0	0	0	0
Peli1	0	9	0	0	0	0	0
Ube2v2	4	0	0	0	0	0	0
Kpna1	0	1	0	0	0	0	0
Gm6444	2	0	0	0	0	0	0
Hn1	4	0	0	0	0	0	0
8430427H17Rik	13	14	0	0	0	0	0
Gm15906	2	1	0	0	0	0	0
Cdh15	1	3	0	0	1	0	0
Impdh2	0	9	0	0	0	0	0
Gm8894	3	0	0	0	0	0	0
1700016C15Rik	0	2	0	0	0	0	0
AI597468	9	0	0	0	0	0	0
Vdac2	11	0	0	0	0	0	0
Sema6b	4	0	0	0	0	0	0
Cog5	0	2	0	0	0	0	0
Hal	2	0	0	0	0	0	0
Txndc15	1	3	0	0	0	0	0
Rem2	7	0	0	0	0	0	0
Degs1	6	0	0	0	0	2	0
Stt3b	1	14	0	0	0	0	0
H2	14	24	0	0	0	0	0
D5Ertd579e	4	0	0	0	0	0	0
Gcm2	3	0	0	0	0	0	0
Lcmt2	2	0	0	0	0	0	0
Agap2	0	9	0	0	0	0	0
Anp32e	0	2	0	0	0	0	0
Wasf2	10	0	0	0	0	0	0
Gria2	0	0	6	0	0	0	0
Crx	0	7	0	0	0	0	0
Fcgrt	2	0	0	0	0	0	0
Nr5a2	0	0	12	0	0	0	0
Lamp1	5	1	0	0	4	0	0
Npr1	7	0	0	0	0	0	0
Znrf4	18	0	0	0	0	0	0
Zfp827	6	3	0	0	0	0	0
Htr3a	3	0	0	0	0	0	0
Ndufb9	2	0	0	0	0	0	0
Adck5	6	19	0	0	0	0	0
Plekho1	0	2	0	0	0	0	0
Ipo9	1	9	0	0	0	0	0
Neto2	0	7	0	0	0	0	0
Gm17520	1	0	0	0	0	0	0
Zfp644	3	0	0	0	0	0	0
Ipcef1	1	0	0	0	0	0	0
Rhbdd3	19	0	0	0	0	0	0
Deb1	12	0	0	0	0	0	0
Gm19807	2	0	0	0	0	0	0
Gm6253	1	0	0	0	0	0	0
B930095G15Rik	5	1	0	0	0	0	0
Hhatl	16	0	0	0	0	0	0
Fdxacb1	1	0	0	0	0	0	0
Rac3	4	0	0	0	0	0	0
Tnfaip1	1	1	0	0	0	0	0
Hyi	0	0	0	0	0	6	0
Slc9a4	1	0	0	0	0	0	0
4930520K10Rik	2	0	0	0	0	0	0
Heatr6	9	0	0	0	0	0	0
Lrrc10b	2	0	0	0	0	0	0
Rras	1	0	0	0	0	0	0
Pip5k1b	0	1	0	0	0	0	0
Zfp281	0	0	7	0	0	0	0
Ednrb	1	0	0	0	0	0	0
Fcgbp	1	0	0	0	0	0	0
Vps35	0	17	0	0	0	0	0
0610009B22Rik	2	0	0	0	0	0	0
Mtap6	0	0	0	0	1	0	0
1810006K21Rik	17	5	0	0	0	0	0
Dus1l	4	0	0	0	0	0	0
Agpat2	0	8	0	0	0	0	0
Slc30a7	3	0	0	0	0	0	0
Gm15696	1	0	0	0	0	0	0
Dok4	0	39	0	0	0	0	0
Acer3	3	2	0	0	0	0	0
Rpl14	10	0	0	0	0	0	0
Capns2	1	6	0	0	0	0	0
Ybx1	3	0	0	0	0	0	0
Iqsec1	22	0	0	0	0	0	0
C77080	17	4	0	0	0	0	0
BC089491	3	0	0	0	0	0	0
Ttc34	1	2	0	0	0	0	0
1700022P22Rik	2	1	0	0	0	0	0
Apobec3	0	20	0	0	0	0	0
Utp3	8	0	0	0	0	0	0
Rfwd3	13	0	0	0	0	0	0
Naif1	15	0	18	0	0	0	0
C130022K22Rik	11	21	0	0	0	0	0
1100001G20Rik	7	0	0	0	0	0	0
Gm11202	0	5	0	0	0	0	0
Sfta2	0	4	0	0	0	0	0
Map1lc3a	3	2	0	0	0	3	0
Gm16287	1	0	0	0	0	0	0
Cnpy3	35	0	8	0	0	0	0
Rapgefl1	4	4	0	0	8	0	0
Gm15333	2	0	0	0	0	0	0
Ywhaq	1	0	0	0	0	0	0
Ccdc18	1	0	0	0	0	0	0
Gm11832	1	0	0	0	0	0	0
A830010M20Rik	4	0	0	0	0	0	0
Coq2	12	0	0	0	3	0	0
Ddo	5	0	0	0	0	0	0
9130204K15Rik	0	1	0	0	0	0	0
Gpr4	0	1	0	0	0	0	0
Gm14276	25	0	0	0	0	0	0
Uhrf1bp1l	0	0	1	0	0	0	0
Gm15618	1	0	0	0	0	0	0
Papola	1	0	0	0	0	0	0
Sh2d5	0	2	0	0	0	0	0
Chmp7	10	0	0	0	0	0	0
Gm7677	1	0	0	0	0	0	0
Jmy	11	0	0	0	0	0	0
Celf1	6	0	0	0	0	0	0
Bcat1	0	2	0	0	0	0	0
Gatad1	7	0	0	0	0	0	0
SNORA51	2	1	0	0	0	0	0
Tpi1	7	7	0	0	0	0	0
Gm13983	1	0	0	0	0	0	0
Extl3	3	1	0	0	0	0	0
Dlx2	0	1	0	0	0	0	0
Stat5a	20	0	0	0	2	0	0
Commd9	0	15	0	0	0	0	0
Ube2b	9	1	0	0	0	0	0
Ftsj2	0	4	0	0	0	0	0
Gm13999	0	1	0	0	0	0	0
Snord65	0	1	0	0	0	0	0
Tbp	1	0	0	0	0	0	0
Gan	1	0	0	0	0	0	0
Prap1	0	5	0	0	0	0	0
Plbd2	6	0	0	0	0	0	0
Clec1b	4	2	0	0	0	0	0
Mul1	1	9	0	0	0	0	0
Oas1c	4	0	0	0	0	0	0
Spag7	2	2	0	0	0	0	0
Gm10032	0	2	0	0	0	0	0
Mir212	0	2	0	0	0	0	0
Smpdl3b	0	9	0	0	0	0	0
Ciita	4	4	0	0	0	0	0
Trim37	12	0	0	0	0	0	0
Plcd3	25	0	0	0	0	0	0
Arhgef19	28	10	12	0	0	0	0
Apoa1bp	1	5	0	0	0	0	0
Nsmce4a	2	1	0	0	0	0	0
Zbtb3	0	13	0	0	0	0	0
Ccnk	16	0	0	0	0	0	0
1110021J02Rik	30	0	0	0	0	0	0
Vps29	0	1	0	0	0	0	0
Zfand2b	9	10	0	0	0	0	0
Ddx23	25	0	0	0	0	0	0
Acsm3	0	0	0	0	3	0	0
Rpusd2	3	0	2	0	0	0	0
Aif1l	0	0	5	0	0	0	0
Fkbpl	0	2	0	0	0	0	0
Plekhh3	25	0	0	0	2	0	0
Mapre1	6	8	0	0	0	0	0
Hspe1	3	2	0	0	0	0	0
Sp3	0	2	3	0	0	0	0
Phb	8	1	0	0	0	0	0
Mir3082	1	0	0	0	0	0	0
Cmtm7	0	0	0	0	2	0	0
Oat	1	3	0	0	0	0	0
Os9	0	13	0	0	0	0	0
Gm13215	4	0	0	0	0	0	0
Gm8213	3	1	0	0	0	0	0
Pebp1	12	0	0	0	0	0	0
Wdr59	19	0	0	0	0	0	0
Samd5	3	0	0	0	0	0	0
Gm11704	2	0	0	0	0	0	0
Gm12217	0	1	0	0	0	0	0
Pdcd7	8	0	0	0	0	0	0
Sema4f	3	0	0	0	0	0	0
4921536K21Rik	0	1	0	0	0	0	0
Gm10355	2	0	0	0	0	0	0
Rapgef1	7	0	0	0	0	0	0
5430411K18Rik	0	0	0	0	1	0	0
Cmas	0	0	0	0	3	0	0
BC027231	28	0	0	0	0	0	0
Dtx3	0	13	0	0	0	0	0
Ly6g6c	0	1	0	0	0	0	0
A530054K11Rik	1	0	0	0	0	0	0
Gm20390	1	0	0	0	0	0	0
Ephx2	4	14	0	0	0	0	2
Ern1	0	1	0	0	0	0	0
Baiap2l2	0	1	0	0	0	0	0
Gm16960	3	1	0	0	0	0	0
Map4k5	17	0	0	0	0	0	0
Reps1	0	9	0	0	0	0	0
Fggy	0	1	0	0	0	0	0
Rnf112	1	0	0	0	0	0	0
Mir3066	1	0	0	0	0	0	0
1700069L16Rik	0	1	0	0	0	0	0
Bahcc1	2	0	0	0	0	0	0
Zfp2	3	0	0	0	0	0	0
Flnb	0	6	0	0	0	0	0
Ndufab1	3	0	0	0	0	0	0
Mir3074	8	0	0	0	0	0	0
Hnrnph2	9	0	0	0	0	0	0
Src	2	16	0	0	0	0	0
Mpped1	6	0	0	0	0	0	0
Ndufs2	2	8	12	0	0	0	0
Cript	3	0	0	0	0	0	0
Slit1	1	0	0	0	0	0	0
Syngr4	7	2	0	0	0	0	0
Carf	6	0	0	0	0	0	0
Tmem190	7	0	0	0	0	0	0
Pcbd1	0	14	0	0	0	0	0
Ftl2	0	1	0	0	0	0	0
Hpdl	6	0	0	0	0	0	0
Tmem63c	17	0	0	0	0	0	0
Tob1	4	0	0	0	0	0	0
Adora2b	0	5	0	0	0	0	0
Nckap5l	7	2	0	0	0	0	0
2010015L04Rik	5	2	0	0	0	0	0
Kirrel	14	17	0	0	0	0	0
Sav1	18	0	0	0	0	0	0
Rtn4rl1	16	2	4	0	0	0	0
Lats2	5	0	0	0	0	0	0
Rab44	3	0	0	0	0	0	0
Cnot10	0	1	0	0	2	0	0
Iqcd	5	0	0	0	0	0	0
Gm17193	0	4	0	0	0	0	0
Cdc40	2	0	0	0	0	0	0
Ube2d3	17	0	0	0	0	0	0
Sobp	12	0	0	0	0	0	0
Ccdc90a	1	0	0	0	0	0	0
Ckb	3	7	0	0	1	0	0
Fam105b	3	1	0	0	0	2	0
C87436	2	1	0	0	0	0	0
4933431E20Rik	4	0	0	0	0	0	0
SNORA26	2	0	0	0	0	0	0
F2	2	0	0	0	0	0	0
Rara	6	5	0	0	10	0	0
Gm11573	4	0	0	0	0	0	0
Stk4	2	4	0	0	0	0	0
Cd27	12	7	0	0	0	0	0
Gm15549	2	0	0	0	0	0	0
Apbb1	10	7	0	0	0	0	0
Tead1	19	0	1	0	0	0	0
R3hcc1	11	0	0	0	0	0	0
Gulo	1	7	0	0	0	0	0
Lrrtm2	0	2	0	0	0	0	0
Rbm14	19	8	0	0	0	0	0
Gm12252	1	0	0	0	0	0	0
C230038L03Rik	2	0	0	0	0	0	0
4930533I22Rik	0	0	0	0	1	0	0
Ndor1	0	4	0	0	0	0	0
Zzz3	28	0	0	0	0	0	0
BC065403	1	0	0	0	0	0	0
Acsbg2	1	0	0	0	0	0	0
Ppp1r3d	0	1	0	0	0	0	0
Rhox4b	2	0	0	0	0	0	0
Secisbp2	51	5	0	0	0	0	0
1700034H15Rik	2	0	0	0	0	0	0
Cct7	0	4	0	0	0	0	0
Calml3	0	5	0	0	0	0	0
Aimp2	0	6	0	0	0	0	0
Smurf1	5	0	0	0	0	0	0
Sbf2	0	1	0	0	0	0	0
Pde4dip	3	3	5	0	0	0	0
Arhgef3	13	0	0	0	0	0	0
Tmem146	6	0	0	0	0	0	0
Slc34a3	0	1	0	0	0	0	0
Myb	8	0	0	0	0	0	0
Pak1ip1	24	2	0	0	0	0	0
Gm14466	0	0	1	0	0	0	0
Gm17022	2	1	0	0	3	0	0
Arhgap21	14	0	0	0	0	0	0
Vars2	0	13	0	0	0	0	0
Pfdn4	0	18	0	0	0	0	0
Paqr4	8	3	0	0	0	0	0
Aqp3	6	0	0	0	2	0	0
Ctrc	3	0	0	0	0	0	0
Gm13785	1	4	0	0	0	0	0
Tmem131	9	0	0	0	0	0	0
Selm	0	5	0	0	0	0	0
Aqp9	6	0	0	0	0	0	0
Khdc1c	0	1	0	0	0	0	0
Canx	1	0	0	0	0	0	0
Xpr1	6	0	0	0	0	0	0
Otud6b	0	2	0	0	0	0	0
Arhgdib	3	0	0	0	0	0	0
2310030G06Rik	1	0	0	0	0	0	0
Ext2	0	1	0	0	0	0	0
Adora2a	0	8	0	0	0	0	0
Dnajc21	10	2	0	0	0	0	0
Ubxn1	0	21	0	0	0	0	0
Iars	3	0	0	0	0	0	0
Mia2	2	0	0	0	0	0	0
Thbs3	3	1	3	0	0	0	0
Rom1	0	17	0	0	0	0	0
Trim16	2	0	0	0	0	0	0
Ldlrad3	0	1	0	0	0	0	0
Cacnb4	19	0	0	0	2	0	0
Cdca7	0	4	0	0	0	0	0
Gm17084	9	0	0	0	0	0	0
Igf2r	2	0	0	0	0	0	0
Gm10300	3	0	0	0	0	0	0
Scube2	1	0	0	0	0	0	0
Pdp1	23	0	0	0	0	0	0
Zfp874b	9	0	0	0	0	0	0
Tm4sf5	1	0	0	0	0	0	0
Tmem5	0	7	0	0	0	0	0
Mrps7	15	2	0	0	0	0	0
Gm11926	0	7	0	0	0	0	0
AW555464	23	0	0	0	0	0	0
1810049H13Rik	5	0	0	0	0	0	0
Gm3452	2	3	0	0	0	0	0
E130116L18Rik	2	0	0	0	0	0	0
Gm4945	4	0	3	0	0	0	0
Slc2a8	23	21	0	0	0	0	0
Gm11492	5	0	0	0	0	0	0
D6Wsu116e	1	0	0	0	0	0	0
Gm14320	1	2	0	0	0	0	0
Fgf9	0	2	0	0	0	0	0
Arhgdig	0	16	0	0	0	0	0
Dock7	9	0	0	0	0	0	0
Itga7	18	0	0	0	0	0	0
Nnat	1	11	0	0	0	0	0
Btbd11	3	0	0	0	0	0	0
4930403N07Rik	0	7	0	0	0	0	0
Pim1	25	0	0	0	0	0	0
Gm13097	2	0	0	0	0	0	0
Sar1a	0	16	0	0	0	0	0
Cpne5	10	0	0	0	0	0	0
Rnf38	0	9	0	0	0	0	0
Snora2b	8	0	0	0	0	0	0
Gm13067	3	0	0	0	0	0	0
Ube2v1	5	9	0	0	0	0	0
Speg	5	12	0	0	0	0	0
Ubl7	14	0	1	0	0	0	0
Msi2	33	28	0	0	0	0	0
Gm12490	3	0	0	0	0	0	0
Gpr124	0	4	0	0	0	0	0
Hipk1	2	0	0	0	0	0	0
Gm11964	1	0	0	0	0	0	0
Fgf17	12	0	5	0	0	0	0
Dab2	2	11	0	0	0	0	0
Lsm6	15	15	0	0	0	0	0
Fbxo33	18	0	0	0	0	0	0
Palb2	3	0	0	0	0	0	0
Pip5k1a	7	1	0	0	0	0	0
Gm9964	13	4	0	0	0	0	0
Has3	10	4	0	0	0	0	0
Chchd1	1	2	0	0	0	0	0
Gpr34	0	2	0	0	0	0	0
Pla2g2f	0	3	0	0	0	0	0
Fam83e	8	2	0	0	0	0	0
Tprn	0	5	0	0	0	0	0
Pih1d2	1	0	0	0	0	0	0
Gm20463	0	2	0	0	0	0	0
Adamts4	1	3	7	0	0	0	0
Sucla2	0	2	0	0	1	0	0
Clic3	0	1	0	0	0	0	0
Kctd2	9	0	0	0	0	0	0
Ptprn2	19	0	0	0	0	0	0
9030617O03Rik	2	0	0	0	0	0	0
Brd1	10	3	0	0	0	0	0
Ifih1	2	0	0	0	0	0	0
Irak1bp1	2	0	0	0	0	0	0
Gm15417	1	0	3	0	0	0	0
Gin1	19	0	0	0	0	0	0
Gipc2	25	0	0	0	0	0	0
Fam71f1	1	0	0	0	0	0	0
Gm12196	1	0	0	0	0	0	0
Wdhd1	2	2	0	0	0	0	0
Dusp12	5	4	5	0	0	0	0
Tmem19	13	0	0	0	0	0	0
Cwc15	1	0	0	0	0	0	0
Gtf2ird2	5	0	0	0	0	0	0
Gm9959	3	0	0	0	0	0	0
I0C0044D17Rik	2	0	0	0	0	0	0
Rchy1	0	3	0	0	0	0	0
Rad51l1	0	1	0	0	8	0	0
E230016K23Rik	2	0	0	0	0	0	0
Ccnf	7	1	0	0	0	0	0
Ube2n	3	6	0	0	0	0	0
Manba	15	0	0	0	0	0	0
Hdac2	2	0	0	0	0	0	0
Gm17224	2	0	0	0	0	0	0
Spsb3	1	0	0	0	0	0	0
AC125186.1	0	0	2	0	0	0	0
Rpl24	0	1	0	0	0	0	0
Vamp5	15	0	0	0	0	0	0
Btf3l4	0	0	0	0	0	1	0
Gm14091	3	0	0	0	0	0	0
Gm12235	0	1	0	0	0	0	0
D430041D05Rik	1	0	0	0	0	0	0
Arid3b	12	0	0	0	0	0	0
Glt8d1	0	1	0	0	0	0	0
4930555I21Rik	6	0	0	0	0	0	0
Traj55	1	0	0	0	0	0	0
A730090H04Rik	4	2	0	0	0	0	0
Rasl12	5	0	0	0	0	0	0
2810429I04Rik	0	1	0	0	0	0	0
Ndufv1	4	11	0	0	0	0	0
Atp6v0e	0	54	0	0	0	3	0
Dom3z	0	2	0	0	0	0	0
Gabpb2	6	2	0	0	0	0	0
Sfxn4	0	3	0	0	0	0	0
Fdft1	0	0	0	0	0	2	0
G6pc	1	0	0	0	1	0	0
Umps	2	0	0	0	0	0	0
Unc13d	3	0	0	0	0	0	0
Gm12219	0	9	0	0	0	0	0
Rhov	0	0	2	0	0	0	0
Ociad1	2	0	0	0	0	0	0
Tmem192	0	0	0	0	1	0	0
SNORD121A	3	0	0	0	0	0	0
Plekhb1	0	1	0	0	0	0	0
Tmprss6	0	3	0	0	0	0	0
Psmc3	9	0	0	0	0	0	0
Sacm1l	4	0	0	0	0	0	0
Pou2f1	14	0	0	0	0	0	0
Gm5464	0	6	0	0	0	0	0
Gm6341	7	1	0	0	0	0	0
Nudt22	0	0	6	0	0	0	0
Kif24	0	0	0	0	4	0	0
Terf1	1	0	0	0	0	0	0
Bglap2	0	7	0	0	0	0	0
Ndufb3	1	0	0	0	0	0	0
Mdk	2	0	0	0	0	0	0
Foxm1	6	4	0	0	0	0	0
1500003O03Rik	0	0	2	0	0	0	0
Haus6	18	2	0	0	0	0	0
Psap	0	2	0	0	0	0	0
Prc1	4	21	0	0	0	0	0
Gm11508	0	2	0	0	0	0	0
Eif2ak4	9	0	0	0	0	0	0
Nup205	3	0	0	0	0	0	0
snoU105B	1	0	0	0	0	0	0
Cc2d2a	14	0	1	0	0	0	0
Ppp1ca	7	16	0	0	0	0	0
Scube3	3	2	0	0	0	0	0
Actn1	10	19	0	0	0	0	0
Gm11576	1	0	0	0	0	0	0
Olfr979	1	0	0	0	0	0	0
Gm17039	1	0	0	0	0	0	0
Skiv2l2	1	0	0	0	0	0	0
Use1	9	0	0	0	0	0	0
Becn1	11	0	0	0	2	0	0
Derl1	8	0	0	0	0	0	0
Mpeg1	3	0	0	0	0	0	0
Srsf12	8	0	0	0	0	0	0
Gm10283	1	0	0	0	0	0	0
Rnft1	1	0	0	0	0	0	0
Zfp386	7	0	2	0	0	0	0
Hck	2	1	0	0	0	0	0
Rtn2	0	1	0	0	0	0	0
Hsd17b4	0	8	0	0	0	0	0
Rgs4	0	0	0	0	0	1	0
Pdia5	0	1	0	0	0	0	0
Rapgef6	0	1	0	0	0	0	0
Wdr89	3	0	0	0	0	0	0
Vash1	31	0	0	0	0	1	0
Recql5	7	2	0	0	0	0	0
Bsn	0	17	0	0	0	0	0
Rpl13a	4	0	0	0	0	0	0
Mir3063	1	0	0	0	0	0	0
Nr1h3	3	0	0	0	0	0	0
Top3a	0	1	0	0	0	0	0
U1	13	10	0	0	0	0	0
1700013G24Rik	0	1	0	0	0	0	0
Lrrc20	0	27	0	0	0	0	0
Mchr1	0	1	0	0	0	0	0
Commd6	9	0	0	0	0	0	0
Arl2bp	3	35	0	0	0	0	0
Gm17627	1	0	0	0	0	0	0
Rnd1	23	0	0	0	0	0	0
Kif15	7	0	0	0	0	0	0
Gm13939	0	0	2	0	0	0	0
0610011F06Rik	3	0	0	0	1	0	0
Mecr	10	0	0	0	0	0	0
Gm5244	8	0	0	0	0	0	0
Gm15419	2	2	0	0	0	0	0
Ptpn1	0	8	0	0	0	0	0
Ift88	14	0	0	0	0	0	0
Akap8l	14	2	0	0	0	0	0
1110065P20Rik	9	2	0	0	0	0	0
Wfdc2	0	1	0	0	0	0	0
1700016K19Rik	3	2	0	0	0	0	0
Xkr7	1	1	0	0	0	0	0
Lect2	1	0	0	0	0	0	0
Mrps18a	4	0	1	0	0	0	0
Nap1l1	3	0	0	0	0	0	0
Gm10702	0	0	3	0	0	0	0
Rasal1	6	0	0	0	0	0	0
Gast	0	2	0	0	0	0	0
Crp	7	0	0	0	0	0	0
Zfp114	0	5	0	0	0	0	0
Exoc2	10	0	0	0	0	0	0
Nek6	2	0	0	0	0	0	0
Gchfr	0	0	2	0	0	0	0
Igfbp6	1	1	0	0	0	0	0
Mertk	6	0	0	0	0	0	0
Mirg	1	0	0	0	0	0	0
Psmb5	16	0	0	0	0	0	0
Impdh1	6	0	0	0	0	0	0
Acer2	8	0	0	0	0	0	0
Padi2	6	6	14	0	0	0	0
Col15a1	17	0	0	0	1	0	0
Phip	2	0	0	0	0	0	0
4833439L19Rik	0	4	0	0	0	0	0
Snrnp200	4	0	0	0	0	0	0
Gm8396	0	3	0	0	0	0	0
9230116N13Rik	0	1	0	0	0	0	0
Gm11732	0	1	0	0	0	0	0
2810407C02Rik	2	0	0	0	0	0	0
Utp6	0	9	0	0	0	0	0
Tbcc	29	0	11	0	0	0	0
Wdr92	1	0	0	0	0	0	0
Agtr1a	3	0	0	0	0	0	0
Glrb	0	0	7	0	0	0	0
2010003K11Rik	5	3	0	0	0	0	0
Nbeal2	3	0	0	0	0	0	0
Ncbp1	0	3	0	0	0	0	0
C230014O12Rik	0	1	0	0	0	0	0
Clasp1	0	2	0	0	0	0	0
Gm9795	1	0	0	0	0	0	0
Amdhd2	11	2	0	0	0	0	0
3010026O09Rik	1	0	0	0	0	0	0
A930012L18Rik	1	0	0	0	0	0	0
Trp53i11	10	13	0	0	0	0	0
Cstb	16	0	0	0	0	0	0
Uhrf1bp1	1	1	0	0	0	0	0
Stard3	0	2	0	0	1	0	0
Abhd2	0	0	0	0	3	0	0
Slc2a4rg	2	0	0	0	0	0	0
4933430I17Rik	0	1	0	0	0	0	0
P2ry12	4	0	0	0	0	0	0
Snord14e	1	2	0	0	0	0	0
Gm15677	2	0	0	0	0	0	0
Gm7290	0	3	0	0	0	0	0
Csgalnact2	1	0	0	0	0	0	0
Sla	2	0	0	0	0	0	0
Olfr523	0	1	0	0	0	0	0
Grlf1	0	1	0	0	0	0	0
Tmem106c	16	0	0	0	0	0	0
BC048403	0	4	0	0	0	0	0
AC110211.1	0	2	0	0	0	0	0
4631405J19Rik	3	1	0	0	0	0	0
Gpr82	0	1	0	0	0	0	0
Nkain4	10	0	0	0	0	0	0
Ccdc112	5	0	0	0	0	0	0
Ngdn	15	0	0	0	0	0	0
Notch3	15	8	0	0	0	0	0
Eif2b2	0	6	0	0	0	0	0
Ccdc64b	2	0	0	0	0	0	0
1200011M11Rik	12	0	0	0	0	0	0
4930556M19Rik	3	2	0	0	0	0	0
B3galt4	0	10	0	0	0	0	0
Ogg1	1	0	0	0	0	0	0
Mirlet7i	0	0	1	0	0	0	0
Minpp1	5	1	0	0	0	0	0
Lep	1	0	0	0	0	0	0
Fam125b	0	16	0	0	0	0	0
Bag1	15	0	0	0	2	0	0
Ppif	1	0	0	0	0	0	0
Adcy2	5	0	0	0	0	0	0
4933407P14Rik	1	0	0	0	0	0	0
Tex9	1	0	0	0	0	0	0
Spata13	15	0	0	0	0	0	0
Iffo1	13	7	0	0	0	0	0
Gm12040	0	1	0	0	0	0	0
Ttll1	21	0	0	0	0	0	0
Gm6450	3	0	0	0	0	0	0
Pik3ap1	7	0	0	0	0	0	0
Lipg	1	0	0	0	0	0	0
Thnsl1	9	0	0	0	0	0	0
Sars2	23	0	0	0	0	0	0
Gm4968	0	1	0	0	0	0	0
Tmem116	0	1	0	0	0	0	0
Ky	1	0	0	0	0	0	0
1700101I11Rik	2	1	0	0	0	0	0
6720483E21Rik	0	1	0	0	0	0	0
Gm12283	1	0	0	0	0	0	0
Rnps1	14	0	0	0	0	0	0
Gm9855	8	0	0	0	0	0	0
Tmco3	10	7	0	0	4	0	0
Efna3	1	0	3	0	0	0	0
Igsf21	0	3	0	0	0	0	0
Prkrip1	0	4	0	0	0	0	0
SNORA4	1	1	0	0	0	0	0
Rdh5	17	0	0	0	0	0	0
Mxi1	11	0	0	0	0	0	0
Itga5	4	0	0	0	0	0	0
Cmya5	8	0	0	0	0	0	0
Tspo	19	0	0	0	0	0	0
Psmc5	11	0	0	0	0	0	0
Nrip1	6	0	0	0	0	0	0
Erp44	8	0	0	0	0	0	0
Rnf25	0	5	0	0	0	0	0
Nol10	7	0	0	0	0	0	0
Gm16552	0	2	0	0	0	0	0
Edn1	6	0	0	0	0	0	0
Tars2	1	7	0	0	0	0	0
Atp1b3	1	1	0	0	0	0	0
C330019G07Rik	1	0	0	0	0	0	0
Gm7235	0	2	0	0	0	0	0
Myo5a	38	0	0	0	0	0	0
2300002M23Rik	0	1	0	0	0	0	0
Arap2	2	0	0	0	0	0	0
Paqr7	12	15	0	0	0	0	0
Prss27	4	2	0	0	0	0	0
BC024139	0	1	0	0	0	0	0
Slc27a4	11	0	0	0	0	0	0
Med11	2	4	0	0	0	0	0
Aprt	4	17	0	0	1	0	0
Lhx5	2	0	0	0	0	0	0
Chd2	15	0	2	0	0	0	0
Scarb1	0	13	0	0	0	0	0
Snord73a	1	0	0	0	0	0	0
Rsph9	3	0	0	0	0	0	0
Gm12056	1	0	0	0	0	0	0
Rps26	6	0	0	0	0	0	0
Gm9183	10	0	0	0	0	0	0
Kifc2	8	14	0	0	0	0	0
Hexim1	28	3	0	0	0	0	0
Ube2s	11	0	0	0	0	0	0
Elk3	3	0	0	0	0	0	0
Gm7244	2	0	0	0	0	0	0
Spata20	7	0	0	0	0	0	0
Prkcq	9	0	0	0	0	0	0
Fam178b	1	0	0	0	0	0	0
Tap2	0	9	0	0	0	0	0
Dcaf5	5	0	0	0	0	0	0
Med12l	1	0	0	0	0	0	0
Atad5	0	3	0	0	0	0	0
Rab40c	4	0	0	0	1	0	0
Xpc	9	21	0	0	0	0	0
Aldh1a2	5	0	0	0	0	0	0
Ift122	0	7	0	0	0	0	0
Ywhab	7	3	0	0	0	0	0
Sult2b1	11	0	0	0	0	0	0
Usp10	1	13	0	0	0	0	0
Trub2	10	0	0	0	0	0	0
2210411K11Rik	11	0	0	0	0	0	0
Ipo5	8	0	0	0	0	0	0
Rhot1	0	1	0	0	0	0	0
Gm17428	4	0	0	0	0	0	0
Camsap2	0	1	0	0	0	0	0
Id2	14	0	0	0	0	0	0
Gm10335	4	0	0	0	0	0	0
Serpinb6a	7	0	0	0	0	0	0
BC066135	0	17	0	0	0	0	0
Cyp2w1	0	3	1	0	0	0	0
Fam73b	4	0	0	0	0	0	0
1700055N04Rik	0	2	0	0	0	0	0
Zfp647	9	1	0	0	0	0	0
Dcaf6	14	0	0	0	0	0	0
Stac3	0	1	0	0	0	0	0
Mrpl52	14	0	0	0	0	0	0
Fam98c	1	0	0	0	0	0	0
Notch4	0	2	0	0	0	0	0
Myo7a	14	1	0	0	0	0	0
Plxnd1	1	4	0	0	0	0	0
Ube2r2	9	0	0	0	3	0	0
1110028F11Rik	3	0	0	0	0	0	0
Gm12094	4	0	0	0	0	0	0
Bmi1	3	0	0	0	0	0	0
Kif2c	0	1	0	0	0	0	0
Gm13072	13	0	0	0	0	0	0
Nmnat1	17	0	0	0	0	0	0
Ngfr	6	1	0	0	0	0	0
Slc25a11	2	3	0	0	0	0	0
Uvrag	0	0	0	0	2	0	0
Gm9385	8	8	0	0	0	0	0
Tatdn3	3	2	0	0	3	0	0
Akt2	2	0	0	0	0	0	0
Aif1	2	0	0	0	0	0	0
Pex5	2	3	0	0	0	0	0
Tcf19	1	4	0	0	0	0	0
Clptm1	0	5	0	0	0	0	0
Gm12266	23	13	0	0	9	0	0
Tmem216	4	0	0	0	0	0	0
Dusp26	5	0	0	0	0	0	0
4732444A12Rik	2	0	0	0	0	0	0
Gm11625	0	0	0	0	1	0	0
Spata21	3	1	7	0	0	0	0
Zfp459	10	0	0	0	0	0	0
Gm11652	3	0	0	0	0	0	0
C030006K11Rik	4	7	0	0	0	0	0
Atad2	1	0	0	0	0	0	0
Cdk17	2	0	0	0	0	0	0
1810035L17Rik	6	0	0	0	0	0	0
AF366264	1	1	0	0	0	0	0
1700082M22Rik	3	0	0	0	0	0	0
H2afy2	0	6	0	0	0	0	0
Gm15798	2	0	0	0	0	0	0
Gm16111	0	2	0	0	0	0	0
Klrd1	6	2	0	0	0	0	0
Adat1	1	0	0	0	0	0	0
Gm13311	3	0	0	0	0	0	0
Sesn2	0	1	0	0	0	0	0
Srp9	21	0	0	0	0	0	0
Cdh3	18	10	0	0	0	0	0
Anapc2	0	5	0	0	0	0	0
Sgsm1	3	1	0	0	0	0	0
Sin3a	1	1	0	0	0	0	0
Nit1	2	6	11	0	0	0	0
Gm10073	27	11	0	0	0	0	0
Heatr8	7	0	0	0	2	0	0
Spryd3	1	2	0	0	0	0	0
Gm9933	2	0	0	0	0	0	0
4930500M09Rik	0	0	0	0	0	1	0
Obox6	0	2	0	0	0	0	0
Omg	6	5	0	0	0	0	0
2900026A02Rik	9	8	0	0	0	0	0
D730003I15Rik	3	3	0	0	0	0	0
Nsun4	0	0	0	0	0	2	0
Supt5h	22	0	0	0	0	0	0
Gch1	3	7	0	0	0	0	0
Slc25a40	7	0	0	0	0	0	0
Gm12340	1	5	0	0	0	0	0
Lalba	2	0	0	0	0	0	0
Fam160b2	17	0	10	0	0	0	0
Fam98b	6	0	0	0	0	0	0
Vps52	0	8	0	0	0	0	0
Prr5l	0	6	0	0	0	0	0
C1qtnf6	4	8	0	0	0	0	0
Gm16175	0	1	0	0	0	0	0
Ccdc122	1	0	0	0	0	0	0
Uqcrb	2	0	0	0	0	0	0
Dsg3	1	0	0	0	0	0	0
Mir1192	0	0	2	0	0	0	0
Lysmd1	5	1	0	0	0	0	0
Uqcrq	3	0	0	0	0	0	0
Cpped1	0	0	0	0	2	0	0
Pcbd2	3	1	0	0	0	0	0
Card9	0	18	0	0	0	0	0
N6amt2	15	0	0	0	0	0	0
Cldn19	1	0	0	0	0	0	0
Mlh3	1	1	0	0	0	0	0
Mzt2	14	0	0	0	0	0	0
Srp19	11	0	0	0	0	0	0
Banf1	0	3	0	0	0	0	0
Dlec1	2	7	0	0	0	0	0
Dhx34	0	27	0	0	0	0	0
Ins2	0	3	0	0	0	0	0
Fdps	9	0	3	0	0	0	0
Rps15	5	0	0	0	1	0	0
BC017643	1	0	0	0	0	0	0
Dnaja1	14	0	0	0	0	0	0
F10	0	0	0	0	1	0	0
Kcnj11	1	0	0	0	0	0	0
Kng1	1	0	0	0	0	0	0
Synm	0	3	0	0	0	0	0
1700011J10Rik	0	0	1	0	0	0	0
Rab3ip	7	0	0	0	0	0	0
Ifrd2	0	15	0	0	0	0	0
AC124489.1	1	1	0	0	0	0	0
1110032A03Rik	1	0	0	0	0	0	0
Cdc37l1	3	0	0	0	0	0	0
Limk2	0	6	0	0	0	0	0
4933440N22Rik	4	0	0	0	0	0	0
Mical1	3	0	0	0	0	0	0
Rps13	2	0	0	0	0	0	0
Camk1	1	0	0	0	0	0	0
Gm1614	0	9	0	0	0	0	0
Rs1	0	1	0	0	0	0	0
Arpc1b	6	0	0	0	0	0	0
Siva1	25	0	0	0	0	0	0
Zmynd10	0	9	0	0	0	0	0
Cdkl5	0	1	0	0	0	0	0
Gdf7	8	0	0	0	0	0	0
Tec	1	0	0	0	0	0	0
1110021L09Rik	3	0	0	0	0	0	0
Atp1a3	1	4	0	0	0	0	0
Smarcd2	6	2	0	0	0	0	0
Rab7	12	0	0	0	0	0	0
Asna1	0	4	0	0	0	0	0
1700001L05Rik	2	1	0	0	0	0	0
Gm6969	6	0	0	0	0	0	0
Mir1894	0	2	0	0	0	0	0
Ncoa7	6	0	0	0	0	0	0
Rbm4b	16	7	0	0	0	0	0
Fam117a	16	9	0	0	0	0	0
F420014N23Rik	0	2	0	0	0	0	0
AC087117.2	0	1	0	0	0	0	0
Armcx1	1	0	0	0	0	0	0
Spaca4	5	0	0	0	0	0	0
Gm5526	1	0	0	0	0	0	0
Snhg3	3	1	0	0	0	0	0
1700020A23Rik	3	0	0	0	0	0	0
Gm12034	0	3	0	0	0	0	0
Gm12792	0	1	0	0	0	0	0
Stim2	13	0	0	0	0	0	0
4931417G12Rik	3	0	0	0	0	0	0
Ogfr	4	7	0	0	0	0	0
Krit1	1	0	0	0	0	0	0
Cul7	36	0	5	0	0	0	3
Gm9918	1	2	0	0	0	0	0
Ddx55	8	0	0	0	0	0	0
Sdc1	5	0	0	0	0	0	0
Phospho1	4	0	0	0	0	0	0
Zdhhc11	0	1	0	0	0	0	0
Rhog	5	4	0	0	0	0	0
Ncs1	6	3	0	0	0	0	0
Gcnt2	21	0	0	0	0	0	0
Tmem14a	0	8	0	0	0	0	0
Rmi1	1	0	0	0	0	0	0
Eif3i	0	9	2	0	0	0	0
1810055G02Rik	0	2	0	0	0	0	0
Tra2b	3	0	0	0	0	0	0
Tmem100	5	0	0	0	0	0	0
Klf5	17	0	0	0	0	0	0
Gm10221	1	0	0	0	0	0	0
Fam120a	2	0	0	0	0	0	0
1600012H06Rik	3	0	0	0	0	0	0
March4	0	1	0	0	0	0	0
Tppp	0	2	0	0	0	0	0
Dcpp1	0	1	0	0	0	0	0
Snapc4	0	16	0	0	0	0	0
Nup153	0	0	1	0	0	0	0
Exosc5	0	3	0	0	0	0	0
Iqcg	0	1	0	0	0	0	0
Agbl3	5	0	0	0	0	0	0
Supt4h1	26	3	0	0	0	0	0
Gm11367	2	0	0	0	0	0	0
Rars	0	0	0	0	0	1	0
Gm13066	4	0	0	0	0	0	0
Tcp11l2	9	0	0	0	0	0	0
Gpc4	0	1	0	0	0	0	0
2310015A10Rik	5	13	0	0	0	0	0
Tsc2	9	0	0	0	0	0	0
Gm10343	11	11	0	0	0	0	0
BX323066.1	0	2	0	0	0	0	0
Smad5	3	0	0	0	0	0	0
Parp9	0	1	0	0	0	0	0
Gm12966	0	0	6	0	0	0	0
Onecut1	5	0	0	0	0	0	0
Atxn7l1	7	0	0	0	0	0	0
Ube2i	6	0	0	0	0	0	0
Slc35c1	2	7	0	0	0	0	0
Ncstn	3	0	0	0	0	0	0
D9Ertd402e	2	0	0	0	0	0	0
Slc25a41	7	0	0	0	0	0	0
Zfyve9	0	0	0	0	0	1	0
Mir378b	3	7	0	0	0	0	0
Slc44a4	0	1	0	0	0	0	0
Spata24	0	13	0	0	0	0	0
Tmcc1	4	0	0	0	0	0	0
Ermp1	0	16	6	0	0	0	0
Plekhh1	7	2	0	0	8	0	0
Phf21b	0	5	0	0	0	0	0
Hivep3	1	0	0	0	0	0	0
Agpat9	3	0	0	0	1	0	0
9930012K11Rik	3	2	0	0	0	0	0
Endog	3	0	0	0	0	0	0
Rasgef1a	3	0	0	0	0	0	0
Prpf38a	0	0	0	0	0	1	0
Lrrc4	3	0	0	0	0	0	0
Pdp2	9	0	0	0	0	0	0
Cidec	1	0	0	0	0	0	0
Gm20396	1	0	0	0	0	0	0
Fam43a	0	1	0	0	0	0	0
C130026L21Rik	3	0	0	0	0	0	0
Chaf1b	15	1	0	0	0	0	0
CT010508.1	0	5	0	0	0	0	0
Gm16276	4	0	0	0	0	0	0
SNORA57	4	5	0	0	0	0	0
Gm16626	7	0	2	0	0	0	0
Lif	10	0	1	0	0	0	0
Hsp90aa1	0	7	0	0	0	0	0
9030025P20Rik	1	0	0	0	0	0	0
Gm14299	0	1	0	0	0	0	0
Gm15715	0	1	0	0	0	0	0
Olfr90	7	0	0	0	0	0	0
Gm13597	0	1	0	0	0	0	0
Apold1	0	3	0	0	0	0	0
Ibsp	2	0	0	0	0	0	0
2310079F23Rik	0	7	0	0	0	0	0
Gm11641	3	1	0	0	0	0	0
Bpgm	8	0	0	0	0	0	0
Capn3	1	0	0	0	0	0	0
2410006H16Rik	1	1	0	0	0	0	0
Sertad4	0	0	0	0	0	2	0
Klf10	0	25	0	0	0	0	0
Gm15558	1	1	0	0	0	0	0
S1pr1	1	0	0	0	0	0	0
4833417C18Rik	1	0	0	0	0	0	0
Gm15912	0	1	0	0	0	0	0
Sdhd	1	0	0	0	0	0	0
Wisp2	4	5	0	0	0	0	0
Vps39	2	7	0	0	0	0	0
Dhrs3	19	0	0	0	0	0	0
Gm11491	1	0	0	0	0	0	0
Cdca7l	20	0	0	0	1	0	0
Gm3307	2	0	0	0	0	0	0
Caly	0	10	0	0	0	0	0
Brwd1	0	3	0	0	0	0	0
Vim	0	4	0	0	0	0	0
Wbp11	3	0	0	0	0	0	0
SNORD24	0	0	0	0	0	1	0
Arntl	7	0	1	0	0	0	0
Ncor1	0	2	0	0	0	0	0
Gm14017	5	0	0	0	0	0	0
Hipk2	5	4	0	0	0	0	0
Heatr7a	0	19	0	0	0	0	0
Nck2	25	11	0	0	0	0	0
Grk1	8	7	0	0	0	0	0
Rtn4	3	0	0	0	0	0	0
Dap3	17	9	3	0	0	0	0
4930461G14Rik	0	0	1	0	0	0	0
Gm2976	0	9	0	0	0	0	0
Spry1	7	3	0	0	0	0	0
Ahcyl1	7	0	0	0	0	0	0
Ranbp6	0	4	0	0	0	0	0
Gm17670	1	0	0	0	0	0	0
Tiam2	0	0	0	0	15	0	0
Sema4d	48	0	0	0	0	0	0
BC018473	2	0	0	0	0	0	0
Sesn1	18	0	0	0	0	0	0
Gm14447	3	0	0	0	0	0	0
Bach1	2	0	0	0	0	0	0
Kcnt1	0	3	0	0	0	0	0
Gm10344	4	0	0	0	0	0	0
Eif4a2	8	0	0	0	0	0	0
F12	8	0	0	0	0	0	0
Gm11514	8	9	0	0	0	0	0
Scamp3	5	3	3	0	0	0	0
Styxl1	0	1	0	0	0	0	0
Igsf8	17	0	0	0	0	0	0
Spag1	2	0	0	0	0	0	0
AA986860	1	0	0	0	0	0	0
2200002K05Rik	13	0	0	0	0	0	0
Map3k6	11	0	0	0	0	0	0
9430091E24Rik	3	0	0	0	0	0	0
1700112E06Rik	3	0	0	0	0	0	0
Spats2	2	0	0	0	0	0	0
9030612E09Rik	15	0	0	0	0	0	0
Ptger2	5	0	0	0	0	0	0
Il22ra1	3	0	0	0	0	0	0
Tnfrsf1a	12	7	0	0	0	0	0
1010001N08Rik	2	0	0	0	0	0	0
Sox10	0	2	0	0	0	0	0
Cdc26	0	3	2	0	0	0	0
Gm7879	13	0	5	0	0	0	0
Gm15710	0	4	0	0	0	0	0
Fgfr4	2	2	0	0	0	0	0
Gtpbp4	1	0	0	0	0	0	0
NRON	0	3	0	0	0	0	0
Sfmbt1	0	10	0	0	0	0	0
Hpd	1	0	0	0	0	0	0
Adamts12	1	1	0	0	0	0	0
Ssh3	2	12	0	0	0	0	0
Cyp8b1	12	0	0	0	0	0	0
Tbc1d22a	0	18	0	0	0	0	0
Stk33	0	1	0	0	0	0	0
Gm14344	1	0	0	0	0	0	0
Pafah1b1	12	3	2	0	0	0	0
Dync1h1	0	7	0	0	0	0	0
Gm20512	0	1	0	0	0	0	0
Nucks1	3	0	0	0	0	0	0
Pole3	0	4	1	0	0	0	0
Jak3	9	0	0	0	0	0	0
Gm6189	1	0	0	0	0	0	0
Nfia	4	0	0	0	0	0	0
Wdr91	8	0	0	0	0	0	0
Ctdspl	2	7	0	0	0	0	0
2610307P16Rik	4	1	0	0	0	0	0
Rhpn1	1	1	0	0	0	0	0
Gm12322	0	1	0	0	0	0	0
Gm16103	7	0	0	0	0	0	0
Gm12035	0	2	0	0	0	0	0
Skp1a	7	2	0	0	0	0	0
Galnt12	24	1	0	0	0	0	0
Apbb2	0	2	0	0	0	0	0
Ugt1a6a	1	0	0	0	0	0	0
Trp53bp1	3	0	0	0	0	0	0
2310022B05Rik	10	0	0	0	0	0	0
Chrnb2	4	0	0	0	0	0	0
Gm4450	4	0	0	0	0	0	0
Fgd2	14	0	0	0	0	0	0
2610035D17Rik	5	0	0	0	0	0	0
Gm13875	0	0	0	0	0	2	0
Klhdc7a	0	1	0	0	0	0	0
O3far1	7	6	0	0	0	0	0
Etf1	0	1	0	0	0	0	0
Arhgef10l	4	7	5	0	0	0	0
Adcy10	2	0	0	0	0	0	0
Gm13012	0	2	0	0	0	0	0
Rhot2	6	1	0	0	1	0	0
Ly6a	0	0	0	0	1	0	0
Tdp1	0	2	0	0	0	0	0
5033428I22Rik	2	0	0	0	0	0	0
Lrp6	3	3	0	0	0	0	0
2610039C10Rik	4	0	0	0	0	0	0
Fubp3	5	0	0	0	0	0	0
Mrfap1	4	0	0	0	0	0	0
Wdr20a	0	7	0	0	0	0	0
Cldn12	0	8	0	0	0	0	0
Rccd1	3	23	0	0	0	0	0
4933439K11Rik	3	0	0	0	0	0	0
5430417L22Rik	2	0	0	0	0	0	0
Cplx2	0	1	0	0	0	0	0
Ces1f	1	0	0	0	0	0	0
Ptpn12	2	8	0	0	0	0	0
Gm6963	3	0	0	0	0	0	0
Pbx2	0	2	0	0	0	0	0
Ppp1r1b	0	1	0	0	1	0	0
Cyhr1	10	17	0	0	0	0	0
AL603664.1	1	1	0	0	0	0	0
Trpm1	5	0	0	0	0	0	0
Gm13394	2	0	0	0	0	0	0
Chst13	1	0	0	0	0	0	0
Gm6030	4	0	0	0	0	0	0
Kcne4	1	0	0	0	0	0	0
Aldh6a1	0	2	0	0	0	0	0
Gm17400	0	1	0	0	0	0	0
Tnfrsf14	7	8	0	0	0	0	0
Ctdsp1	0	5	0	0	0	0	0
Hhipl1	10	0	0	0	0	0	0
Prrc2c	1	0	0	0	0	0	0
Igj	7	0	0	0	0	0	0
Lrrn3	6	0	0	0	0	0	0
Wdr66	2	0	0	0	0	0	0
Tulp3	18	4	0	0	0	0	0
Tmie	1	0	0	0	0	0	0
Spns3	0	2	0	0	0	0	0
C630004H02Rik	2	0	0	0	0	0	0
Dbnl	8	0	0	0	0	0	0
Rasl10a	10	0	0	0	0	0	0
Zer1	2	0	0	0	0	0	0
Atrip	0	3	0	0	0	0	0
Ptprv	0	1	0	0	0	0	0
Pdia6	1	0	0	0	0	0	0
Gm15576	0	0	0	0	1	0	0
Slc16a9	4	0	0	0	0	0	0
Creb1	2	0	0	0	0	0	0
Igf2as	0	1	0	0	0	0	0
Runx1t1	14	0	0	0	0	0	0
Hn1l	2	0	0	0	0	0	0
Heg1	2	0	0	0	0	0	0
Ngrn	4	22	0	0	0	0	0
Fam118a	0	1	0	0	0	0	0
Siah2	4	0	0	0	0	0	0
SNORA38	0	1	0	0	0	0	0
Mtbp	5	0	0	0	0	0	0
Prph2	0	0	2	0	0	0	0
Gm11945	0	1	0	0	0	0	0
Pla2g4e	1	2	0	0	0	0	0
AC127313.1	2	0	0	0	0	0	0
Ildr2	1	0	0	0	0	0	0
Gm12983	1	0	0	0	0	0	0
Wnt6	0	2	0	0	0	0	0
Gm17212	0	0	0	0	4	0	0
Pcolce	1	0	0	0	0	0	0
Sgpp2	0	0	10	0	0	0	0
Kbtbd13	4	0	0	0	0	0	0
Gm12950	1	0	0	0	0	0	0
Zc3hav1l	14	0	0	0	0	0	0
Rpa1	27	4	5	0	0	0	0
Inpp5a	9	7	0	0	0	0	0
N4bp2	0	3	0	0	0	0	0
AA987161	5	0	0	0	0	0	0
Cox7a2l	2	0	0	0	0	0	0
AC160118.1	2	0	0	0	0	0	0
Gm14005	6	0	0	0	0	0	0
Cirh1a	2	3	0	0	0	0	0
Rhbg	0	4	0	0	0	0	0
Yrdc	8	2	0	0	0	0	0
Tmem178	4	0	0	0	0	0	0
Gm17431	1	1	0	0	0	0	0
Gm14586	0	4	0	0	0	0	0
Fxyd4	5	0	0	0	0	0	0
Cyp20a1	6	0	0	0	0	0	0
Lrp10	9	0	0	0	0	0	0
Coro2b	0	18	0	0	0	0	0
Polr2b	0	1	0	0	0	0	0
Gm16767	3	0	0	0	0	0	0
Upk3b	0	5	1	0	0	0	0
Ttc7	9	0	0	0	0	0	0
Eea1	0	8	0	0	0	0	0
Adam1b	0	3	0	0	0	0	0
Ormdl3	1	4	0	0	8	0	0
Ovgp1	0	13	0	0	0	0	0
Smo	1	0	0	0	0	0	0
Ssr2	17	25	3	0	0	0	0
Gm10556	1	0	0	0	0	0	0
Zp3	0	2	0	0	0	0	0
Thoc3	0	2	0	0	0	0	0
Dpcr1	0	4	0	0	0	0	0
Mrps21	0	3	0	0	0	0	0
Dnm3	3	0	0	0	0	0	0
Mrpl53	6	0	0	0	0	0	0
Igfbp2	0	5	0	0	0	0	0
Pebp4	2	0	0	0	0	0	0
Marcks	6	0	0	0	0	0	0
Gm18489	1	1	0	0	0	0	0
Mrps24	9	0	0	0	0	0	0
Tsnax	13	0	0	0	0	0	0
Erh	10	0	0	0	0	0	0
Dynlrb2	0	1	0	0	0	0	0
Ccdc78	9	0	0	0	0	0	0
R74862	0	9	0	0	0	0	0
Gm8186	2	3	0	0	0	0	0
P4hb	5	0	0	0	0	0	0
Gm17439	2	0	0	0	0	0	0
1700015O11Rik	1	0	0	0	0	0	0
7530422B04Rik	1	2	0	0	0	0	0
Gm12234	0	1	0	0	0	0	0
Col20a1	12	0	0	0	2	0	0
Mir199b	1	0	5	0	0	0	0
Gm12991	3	0	0	0	0	0	0
Mlana	0	7	4	0	0	0	0
Ppat	0	3	0	0	0	0	0
Tcea3	1	0	0	0	0	0	0
Ciz1	17	1	20	0	0	0	0
Skor2	2	0	0	0	0	0	0
Herc1	4	0	0	0	0	0	0
Gm16185	1	0	0	0	0	0	0
F630043A04Rik	2	0	0	0	0	0	0
Banp	0	12	0	0	0	0	0
Tpp2	3	2	0	0	0	0	0
Evl	18	22	0	0	0	0	0
Hilpda	7	0	0	0	0	0	0
Vangl1	2	4	0	0	0	0	0
Gstm5	6	0	0	0	0	0	0
Phf1	0	3	0	0	0	1	0
Pam	29	0	0	0	0	0	0
Gm11942	1	0	0	0	0	0	0
Aebp1	7	0	0	0	0	0	0
Ptges2	20	3	15	0	0	0	0
Kcne2	0	2	1	0	0	0	0
Lrrc59	17	14	0	0	0	0	0
Gm5406	1	0	0	0	0	0	0
Ube3b	1	6	0	0	0	0	0
Pml	6	0	2	0	0	0	0
Gm11768	1	0	0	0	0	0	0
A830073O21Rik	2	0	0	0	0	0	0
Trpc4ap	4	4	0	0	0	5	0
Txndc8	2	0	0	0	0	0	0
Eif3l	0	12	0	0	0	0	0
Dgat1	6	19	0	0	0	0	0
Eci1	10	1	0	0	0	0	0
Dcps	1	0	0	0	0	0	0
Gypa	1	0	0	0	0	0	0
Rab7l1	10	0	0	0	0	0	0
Fam198b	5	0	0	0	0	0	0
Tead4	6	2	0	0	0	0	0
Ralgps1	2	4	0	0	0	0	0
Dus4l	0	3	0	0	0	0	0
Ndrg1	3	0	0	0	0	0	0
Ipo13	0	0	0	0	0	7	0
Gpr108	4	4	0	0	0	0	0
Cct6a	0	2	0	0	0	0	0
Gm15829	1	0	0	0	0	0	0
Dbn1	11	5	0	0	0	0	0
Ubac1	0	1	0	0	0	0	0
Grip2	10	17	0	0	0	0	0
Gm4737	2	0	0	0	0	0	0
Tbata	0	16	0	0	0	0	0
Adsl	0	7	0	0	0	0	0
Terf2	3	0	0	0	0	0	0
Melk	0	5	0	0	0	0	0
Dhx58	12	0	0	0	1	0	0
Zwint	0	1	0	0	0	0	0
Lmtk3	10	2	0	0	0	0	0
Zfp961	5	0	0	0	0	0	0
Ctgf	0	0	0	0	0	0	3
Fxn	0	11	0	0	0	0	0
Tmem89	0	3	0	0	0	0	0
Sepw1	0	12	0	0	0	0	0
Wnt7b	0	0	5	0	0	0	0
Gm8394	1	0	0	0	0	0	0
Mir686	7	0	0	0	0	0	0
Panx2	3	1	0	0	0	0	0
1200016B10Rik	16	2	0	0	0	0	0
Dtx1	7	0	0	0	0	0	0
Rsrc2	0	5	0	0	0	0	0
Gm17586	3	0	0	0	0	0	0
Osgin1	0	3	0	0	0	0	0
Carns1	0	9	0	0	0	0	0
Mtx3	9	1	0	0	0	0	0
Gm11362	5	2	0	0	0	0	0
Dnajc7	5	2	0	0	1	0	0
Cox4i1	16	0	0	0	0	0	0
Gpr68	8	0	0	0	0	0	0
Rnf2	22	3	0	0	0	0	0
Ube4b	12	0	0	0	0	0	0
BC027582	1	0	0	0	0	0	0
Pth1r	2	0	0	0	0	0	0
A230087F16Rik	1	0	0	0	0	0	0
Gm19357	0	3	0	0	0	0	0
Pnn	18	0	0	0	0	0	0
Pdgfrl	0	1	0	0	0	0	0
Gm17626	4	0	0	0	0	0	0
Gm16534	2	0	5	0	0	0	0
Ubox5	3	0	0	0	0	0	0
Gm11725	0	2	0	0	0	0	0
Apoc2	0	2	0	0	0	0	0
Nubp2	2	0	0	0	0	0	0
Farp1	11	3	0	0	0	0	0
Atg4d	7	0	0	0	0	0	0
Vps13d	16	0	0	0	0	0	0
Nfxl1	1	0	0	0	0	0	0
Mir3089	2	1	0	0	0	0	0
Sh3pxd2a	14	18	0	0	0	0	0
Pbk	7	0	0	0	0	0	2
Rps29	0	12	0	0	0	0	0
Cks1b	1	0	3	0	0	0	0
Cela2a	10	0	0	0	0	0	0
Chmp5	15	0	0	0	2	0	0
Myd88	1	3	0	0	0	0	0
Dctn3	0	0	0	0	2	0	0
Wdr52	13	0	0	0	0	0	0
Celsr3	0	4	0	0	0	0	0
X99384	0	24	0	0	0	0	0
Cdc6	5	4	0	0	9	0	0
Fam122a	0	1	0	0	0	0	0
2610002J02Rik	14	18	0	0	0	0	0
Hcn3	3	0	3	0	0	0	0
1700110K17Rik	1	0	7	0	0	0	0
Gm16539	0	1	0	0	0	0	0
Mogat2	0	0	0	0	1	0	0
Ilk	3	7	0	0	0	0	0
Zfp664	4	7	0	0	0	0	0
Cib1	8	23	0	0	0	0	0
Trpc2	1	4	0	0	0	0	0
Kri1	7	0	0	0	0	0	0
Map4k2	0	0	1	0	0	0	0
Acvr2b	0	2	0	0	0	0	0
Tmem167	1	0	0	0	0	0	0
Bcas2	7	0	0	0	0	0	0
4921513D11Rik	1	0	0	0	0	0	0
Pdlim7	14	6	0	0	0	0	0
Gm14549	3	0	0	0	0	0	0
Cog8	3	1	0	0	0	0	0
E030013I19Rik	2	0	0	0	0	0	0
Slc44a2	6	0	0	0	0	0	0
Gm16191	2	0	0	0	0	0	0
Folr1	0	1	0	0	0	0	0
Gm15559	0	1	0	0	0	0	0
Pfdn1	0	1	0	0	0	0	0
Gm15654	3	0	0	0	0	0	0
Lrrc24	9	13	0	0	0	0	0
Prdm10	13	0	0	0	0	0	0
Nudt4	2	8	0	0	0	0	0
Gjb2	2	0	0	0	0	0	0
Mif4gd	15	2	0	0	0	0	0
Pgs1	0	9	0	0	0	0	0
Chia	0	1	0	0	0	0	0
Tab1	0	21	0	0	0	0	0
Ap2b1	1	0	0	0	0	0	0
Als2cr11	1	0	0	0	0	0	0
Gm16032	1	2	0	0	0	0	0
Prmt7	16	0	0	0	0	0	0
Gm13024	1	0	0	0	0	0	0
Kti12	0	0	0	0	0	1	0
Gm11434	5	0	0	0	0	0	0
Chmp1a	16	1	0	0	0	0	0
1110017D15Rik	0	0	0	0	2	0	0
Nr0b2	3	5	0	0	0	0	0
Strada	9	0	0	0	0	0	0
Sntb2	6	2	0	0	0	0	0
Arhgef12	6	0	0	0	0	0	0
Sap18	3	0	0	0	0	0	0
Hnrnph1	2	0	0	0	0	0	0
Wdtc1	14	1	0	0	0	0	0
Gm13092	10	0	0	0	0	0	0
Nfkbib	23	0	0	0	0	0	0
Gm10135	1	0	0	0	0	0	0
Vipr2	3	0	0	0	0	0	0
Begain	3	3	0	0	0	0	0
Msl1	3	5	0	0	11	0	0
Prickle2	5	0	0	0	0	0	0
Golt1b	0	0	0	0	7	0	0
Mars	0	2	0	0	0	0	0
Fcgr4	4	2	8	0	0	0	0
Trnau1ap	1	1	0	0	0	0	0
Mast2	8	0	0	0	0	0	0
Tomm22	0	18	0	0	0	0	0
Cd200r1	9	0	0	0	0	0	0
Traf6	0	14	0	0	0	0	0
9530052E02Rik	0	3	0	0	0	0	0
Gm13378	7	0	0	0	0	0	0
Ttbk1	8	0	0	0	0	0	2
Col7a1	0	3	0	0	0	0	0
Gm12054	1	0	0	0	0	0	0
Actr6	0	0	1	0	0	0	0
Specc1l	0	10	0	0	0	0	0
Wdr60	26	0	6	0	0	0	0
Ostn	2	0	0	0	0	0	0
Ube2z	3	0	0	0	0	0	0
Tbcel	1	0	0	0	0	0	0
Gm13650	8	0	0	0	0	0	0
Xrcc6bp1	0	5	0	0	0	0	0
Gpatch4	1	2	0	0	0	0	0
Tapbp	0	10	0	0	0	0	0
Stoml1	5	0	2	0	0	0	0
Gm16256	2	0	0	0	0	0	0
Soat1	2	0	0	0	0	0	0
Fam129b	25	20	7	0	0	0	0
Pdcd1lg2	2	6	3	0	0	0	0
Ccdc80	3	0	0	0	0	0	0
Lenep	1	0	3	0	0	0	0
Phyhd1	8	0	0	0	0	0	0
Dis3	10	0	0	0	0	0	0
Gm10197	5	0	0	0	0	0	0
Map3k13	3	0	0	0	0	0	0
Anxa3	6	0	0	0	0	0	0
Zfand6	2	0	0	0	0	0	0
Col9a3	3	1	0	0	0	0	0
Fem1b	0	9	0	0	0	0	0
Gm16481	4	0	0	0	0	0	0
Phlpp1	0	1	0	0	0	0	0
Mrpl40	2	0	0	0	0	0	0
Gm6990	0	8	0	0	0	0	0
Tpsg1	2	0	0	0	0	0	0
Flii	1	2	0	0	0	0	0
Sos2	13	2	0	0	0	0	0
Hoxb3os	2	0	0	0	0	0	0
Ccdc114	13	0	0	0	0	0	0
Hmgn1	0	2	0	0	0	0	0
Gm12390	7	0	0	0	0	0	0
Olfr1413	0	0	0	0	1	0	0
Gm10973	1	0	0	0	0	0	0
Fuk	14	2	0	0	0	0	0
Gm11531	1	0	0	0	0	0	0
Gm15563	2	0	0	0	0	0	0
Ss18l1	0	14	0	0	0	0	0
Gm17645	1	0	0	0	0	0	0
Orc6	0	10	0	0	0	0	0
Ccdc92	8	13	0	0	0	0	0
Ankfy1	1	2	0	0	0	0	0
Gm13076	1	0	0	0	0	0	0
Tulp2	1	2	0	0	0	0	0
Slc16a10	5	1	0	0	0	0	0
Med27	1	0	0	0	0	0	0
Apc	17	0	0	0	0	0	0
Lingo1	7	5	0	0	0	0	0
Olfml2b	2	0	0	0	0	0	0
Pnkp	3	0	0	0	0	0	0
Notch2	6	4	3	0	0	0	0
Shisa2	4	0	0	0	0	0	0
Aqp5	4	1	0	0	0	0	0
Zbtb8a	5	4	0	0	0	0	0
Cgrrf1	6	14	0	0	0	0	0
Fam55b	5	0	0	0	0	0	0
4732418A04Rik	3	0	0	0	0	0	0
9430097D07Rik	9	0	4	0	0	0	0
Nedd4	1	0	0	0	0	0	0
Gm12058	6	10	0	0	0	0	0
Unc45a	2	23	0	0	0	0	0
Gm6565	1	0	0	0	2	0	0
0610009B14Rik	1	0	0	0	0	0	0
Efcab4b	0	2	0	0	0	0	0
Tmem90a	0	4	0	0	0	0	0
Usp54	0	1	0	0	0	0	0
Ralgps2	3	0	0	0	0	0	0
She	3	0	0	0	0	0	0
Igf1	2	0	0	0	0	0	0
Klhdc3	37	0	4	0	0	0	3
Ptpra	4	0	0	0	0	0	0
Clcn7	0	0	0	0	1	0	0
Crym	0	0	0	0	1	0	0
Nfkbil1	2	1	0	0	0	0	0
Tmem57	3	3	0	0	0	0	0
Ank	3	0	0	0	0	2	0
Myst2	16	15	0	0	0	0	0
Arfgap1	13	0	0	0	2	0	0
Trmu	0	14	6	0	0	0	0
Dpm3	4	0	3	0	0	0	0
Rmnd1	0	1	0	0	0	0	0
Dtx3l	0	1	0	0	0	0	0
Alkbh7	6	2	0	0	0	0	0
Gm11539	2	0	0	0	0	0	0
Bdh1	1	0	0	0	0	0	0
Polr1b	1	0	0	0	0	0	0
Gm12279	0	1	0	0	0	0	0
Klhl18	3	0	0	0	0	0	0
Ciapin1	0	48	0	0	0	0	0
Snrpg	4	1	0	0	0	0	0
1700102P08Rik	0	5	0	0	0	0	0
Nampt	2	0	0	0	0	0	0
Emg1	8	5	0	0	0	0	0
Pes1	4	0	0	0	0	0	0
Rps12	4	0	0	0	0	0	1
Ccdc54	1	0	0	0	0	0	0
Gm13771	2	0	0	0	0	0	0
Mtmr2	8	0	0	0	0	0	0
Npdc1	0	1	0	0	0	0	0
Il28b	1	0	0	0	0	0	0
Gcsh	1	0	0	0	0	0	0
Hand2	3	0	0	0	0	0	0
Eif4e3	6	0	0	0	0	0	0
Cic	0	7	0	0	0	0	0
Atpaf1	0	0	0	0	0	2	0
Gm14469	0	0	2	0	0	0	0
Fam134b	1	0	0	0	0	0	0
Slc26a9	5	0	0	0	0	0	0
Man2b1	0	1	0	0	0	0	0
Tuba1c	8	0	0	0	0	0	0
Gm1568	4	0	0	0	0	0	0
Gm13056	4	2	3	0	0	0	0
Ripk1	8	0	0	0	0	0	0
Gm12750	14	0	0	0	0	0	0
Gpbp1l1	7	0	0	0	0	0	0
Gm5884	1	0	0	0	0	0	0
Gm17382	0	3	0	0	0	1	0
Lgals7	8	0	0	0	0	0	0
SNORD62	1	0	0	0	0	0	0
Lcp1	7	0	0	0	0	0	0
Hmcn2	1	0	0	0	0	0	0
Gm12336	0	2	2	0	0	0	0
Ocel1	7	0	0	0	0	0	0
Mapkbp1	2	9	0	0	0	0	0
Spint2	4	0	0	0	0	0	0
Adora3	0	12	0	0	0	0	0
Rcbtb2	0	2	0	0	0	0	0
Gba	4	2	3	0	0	0	0
Casc4	5	0	0	0	0	0	0
Gm11541	2	4	0	0	0	0	0
Slc5a3	0	1	0	0	0	0	0
Mir678	1	0	0	0	0	0	0
Gins2	16	0	0	0	0	0	0
Dip2c	1	0	0	0	0	0	0
Gm7276	2	0	0	0	0	0	0
Mnat1	0	1	0	0	0	0	0
Aspdh	3	0	0	0	0	0	0
Oaf	4	0	0	0	0	0	0
Gm11694	4	0	0	0	0	0	0
Disc1	4	0	0	0	0	0	0
Inf2	19	0	0	0	0	0	0
Tyk2	1	0	0	0	0	0	0
AU022754	0	0	4	0	0	0	0
Mbd6	0	3	0	0	0	0	0
Prss57	10	0	3	0	0	0	0
Fam124a	1	0	0	0	0	0	0
Mphosph10	1	0	0	0	0	0	0
AL672100.1	1	0	0	0	0	0	0
Zfp169	1	0	0	0	0	0	0
Yars2	5	0	0	0	0	0	0
Mak	1	0	0	0	0	0	0
Sema6c	6	0	0	0	0	0	0
Zdhhc20	3	0	0	0	0	0	0
Tex10	23	0	0	0	0	0	0
Lmbr1l	12	0	0	0	0	0	0
Rfk	0	6	0	0	0	0	0
Stx17	1	0	0	0	0	0	0
Chst12	0	14	0	0	0	0	0
Pptc7	0	6	0	0	0	0	0
Mfsd3	10	15	0	0	0	0	0
Haus2	1	0	0	0	0	0	0
Ddx47	1	3	0	0	0	0	0
Gm13230	1	0	0	0	0	0	0
Ifnar1	0	7	0	0	0	0	0
4933406C10Rik	1	0	0	0	0	0	0
Mir5136	0	2	0	0	0	0	0
Cntfr	0	0	0	0	2	0	0
Ccdc102a	0	45	0	0	0	0	0
Cdc42ep1	3	9	0	0	0	0	0
Gm16983	0	4	0	0	0	0	0
Slc22a16	1	0	0	0	0	0	0
Zc3hav1	12	0	0	0	0	0	0
Ppm1l	0	0	0	0	4	0	0
Micall1	0	5	0	0	0	0	0
Tenc1	1	2	0	0	0	0	0
Gpr126	4	0	0	0	0	0	0
Snd1	1	0	0	0	0	0	0
Ndufa12	1	0	0	0	0	0	0
Gm11535	1	0	0	0	0	0	0
Gm11841	6	0	0	0	0	0	0
Myadml2	2	0	0	0	0	0	0
Fam118b	1	0	0	0	0	0	0
2210407C18Rik	1	0	0	0	0	0	0
Rgs1	2	0	0	0	0	0	0
Gm16069	1	0	3	0	0	0	0
Slc45a1	1	0	0	0	0	0	0
Shc2	8	0	14	0	0	0	0
Clec2d	11	3	0	0	0	0	0
Cpxm2	2	0	0	0	0	0	0
Klk1b5	1	0	0	0	0	0	0
Gm17213	0	0	0	0	1	0	0
Snapin	9	0	0	0	0	0	0
Hey2	2	0	0	0	0	0	0
Cdkl3	1	0	0	0	0	0	0
Rab21	12	0	0	0	0	0	0
4632433K11Rik	2	0	0	0	0	0	0
Ddost	3	12	0	0	0	0	0
Slc30a2	0	1	0	0	0	0	0
Rilp	23	3	5	0	0	0	0
Atp6v1d	11	3	0	0	10	0	0
Tnfrsf10b	6	0	0	0	0	0	0
1600002H07Rik	5	2	0	0	0	0	0
Fam167b	0	2	1	0	0	0	0
Sdpr	1	0	0	0	0	0	0
Capn10	0	0	0	0	2	0	0
Cd52	8	6	0	0	0	0	0
Rab8b	4	4	0	0	0	0	0
Cilp	5	0	0	0	0	0	0
Ccdc47	8	0	0	0	0	0	0
Fam101a	0	6	0	0	0	0	0
Syngr1	0	20	0	0	0	0	0
Scarna10	5	6	0	0	0	0	0
Gm11537	1	0	0	0	0	0	0
Sphk2	14	2	0	0	0	0	0
Myl12b	3	0	0	0	0	0	0
Zfp362	35	0	0	0	0	0	0
Scnn1a	7	4	0	0	0	0	0
Acot1	1	0	0	0	0	0	0
Cdhr4	0	11	0	0	0	0	0
1700019N12Rik	0	0	3	0	0	0	0
Ppef2	0	3	0	0	0	0	0
Fam185a	2	16	0	0	0	0	0
Zhx2	8	0	0	0	0	0	0
Cabp7	3	0	6	0	0	0	0
Angptl1	5	0	0	0	0	0	0
Eif5	3	9	0	0	0	0	0
Abca8b	1	0	0	0	0	0	0
1700023F06Rik	12	1	0	0	0	0	0
Hdhd3	0	4	2	0	0	0	0
Plcl2	2	0	0	0	0	0	0
Suv420h1	0	1	0	0	0	0	0
Gm15511	2	0	0	0	0	0	0
Gpx4	11	0	4	0	0	0	0
Gm15527	0	0	0	0	1	0	0
Pex16	2	8	0	0	0	0	0
Gm14494	1	0	0	0	0	0	0
Theg	1	0	4	0	0	0	0
Luc7l	0	15	0	0	1	1	0
Krt14	0	5	0	0	0	0	0
Ccdc88c	4	0	0	0	0	0	0
Cdk11b	4	2	0	0	0	0	0
Msra	3	0	0	0	0	0	0
Scrt1	3	11	0	0	0	0	0
Gm14488	11	8	0	0	0	0	0
Pars2	1	1	0	0	6	0	0
9230111E07Rik	0	3	0	0	0	0	0
Fbxo42	13	11	19	0	0	0	0
Mrps18b	0	12	0	0	0	0	0
Snord49a	0	1	0	0	0	0	0
BC032203	16	0	5	0	0	0	0
Dhx57	5	0	0	0	0	0	0
Olfr545	1	0	0	0	0	0	0
Nol11	2	5	0	0	0	0	0
Cd274	5	8	4	0	0	0	0
2510006D16Rik	1	7	2	0	0	0	0
Zc3h10	2	0	0	0	0	0	0
Fut10	5	0	0	0	0	0	0
Sept8	5	0	0	0	0	0	0
Clec10a	6	3	0	0	0	0	0
Alx4	0	4	0	0	0	0	0
Gpr84	2	0	0	0	0	0	0
Cyp2d26	0	1	0	0	0	0	0
Pld6	6	7	0	0	0	0	0
Fam38a	1	15	0	0	0	0	0
1810012K08Rik	0	5	0	0	0	0	0
Acap1	4	0	0	0	0	0	0
Serp1	5	0	0	0	0	0	0
9530068E07Rik	1	0	0	0	0	0	0
Tcta	0	14	0	0	0	0	0
Gm14453	0	2	0	0	0	0	0
Snx11	11	0	0	0	0	0	0
Gpr176	2	0	0	0	0	0	0
Tns4	6	0	1	0	2	0	0
Lrrn4cl	0	12	0	0	0	0	0
Gnrh1	0	1	0	0	0	0	0
Gm12037	0	3	0	0	0	0	0
Gm11435	1	0	0	0	0	0	0
Arhgap29	2	10	0	0	0	0	0
Gm17461	1	0	0	0	0	0	0
Lmx1b	0	3	0	0	0	0	0
Glycam1	1	0	0	0	0	0	0
Aldh3b2	0	3	0	0	0	0	0
Pabpc1l	1	2	0	0	0	0	0
Pcgf5	1	0	0	0	0	0	0
C1ql1	13	0	0	0	0	0	0
Mst1r	0	8	0	0	0	0	0
Psmg3	0	1	0	0	0	0	0
Hap1	0	3	0	0	0	0	0
Noxo1	8	0	0	0	0	0	0
Gm14001	3	0	0	0	0	0	0
Gm16741	0	1	0	0	0	0	0
Nrbp2	0	10	0	0	0	0	0
snoU83B	0	2	0	0	0	0	0
Csnk2a2	6	0	0	0	0	0	0
1110035M17Rik	1	0	0	0	0	0	0
Gm13032	2	2	3	0	0	0	0
Lrrc27	8	5	0	0	0	0	0
Hsbp1	0	2	0	0	0	0	0
Rps2	11	2	0	0	0	0	0
Hdac1	3	8	2	0	0	0	0
Trim63	3	4	0	0	0	0	0
Eps15	22	0	0	0	0	0	0
Litaf	8	10	0	0	0	0	0
Gm17364	0	1	0	0	0	0	0
Hspa9	0	1	0	0	0	0	0
Flcn	19	18	0	0	0	0	0
Zfp953	10	0	0	0	0	0	0
Gm11970	1	0	0	0	0	0	0
Pkd2l2	7	0	0	0	0	0	0
Psmb6	5	4	0	0	0	0	0
Hsdl1	0	9	0	0	0	0	0
Fam131c	19	8	2	0	0	0	0
Dolk	13	5	0	0	0	0	0
Fnbp1	4	4	0	0	0	0	0
Cntf	7	0	0	0	0	0	0
Qk	17	0	0	0	0	0	0
Vash2	3	3	0	0	0	0	0
Nr2f6	5	0	0	0	0	0	0
Fam123a	3	0	0	0	0	0	0
Rph3a	1	0	0	0	0	0	0
2210404J11Rik	6	0	0	0	0	0	0
4930579G22Rik	0	1	0	0	0	0	0
Slc18a1	2	0	0	0	0	0	0
A430060F13Rik	1	5	0	0	0	0	0
Reep6	1	0	0	0	0	0	0
Gm12705	1	0	0	0	0	0	0
Tonsl	6	18	0	0	0	0	0
Kidins220	21	0	0	0	0	0	0
Art5	2	4	0	0	0	0	0
Dnalc1	1	0	0	0	0	0	0
Gm16048	1	0	0	0	0	0	0
Sarm1	0	1	0	0	0	0	0
2310067B10Rik	15	2	0	0	0	0	0
Mterfd3	9	0	0	0	0	0	0
Kcnc3	7	0	0	0	0	0	0
Fgr	1	6	0	0	0	0	0
Gm12978	7	0	0	0	0	0	0
Hpca	14	2	0	0	0	0	0
Josd1	0	8	0	0	0	0	0
Zfp791	0	2	0	0	0	0	0
Smu1	13	0	0	0	1	0	0
Zfp712	10	0	0	0	0	0	0
3110003A17Rik	0	14	0	0	0	0	0
Gm17334	1	3	0	0	0	0	0
Plcxd2	1	0	0	0	0	0	0
Myh14	5	0	0	0	0	0	0
Abi2	5	0	0	0	0	0	0
Gm14642	0	1	0	0	0	0	0
Clk2	4	0	3	0	0	0	0
Foxj2	18	0	0	0	0	0	0
1700040I03Rik	0	3	0	0	0	0	0
Gm16163	2	0	0	0	0	0	0
Mcrs1	8	0	0	0	0	0	0
Stx6	1	0	0	0	0	0	0
Oas2	5	0	0	0	0	0	0
Serinc4	4	0	0	0	0	0	0
Adam12	2	0	0	0	0	0	0
Dctn4	1	14	0	0	0	0	0
Stxbp5	7	0	0	0	0	0	0
Ptpn7	1	3	0	0	0	0	0
Mfsd5	1	2	0	0	0	0	0
Padi1	2	2	3	0	0	0	0
BC028777	3	0	0	0	0	0	0
Dctn5	4	0	0	0	0	0	0
Klf11	20	0	0	0	0	0	0
6430531B16Rik	0	4	0	0	0	0	0
Gpr62	15	0	0	0	0	0	0
Pvrl2	0	4	0	0	0	0	0
Gm13835	3	0	0	0	0	0	0
Sik1	13	8	0	0	0	0	0
Alg12	9	3	0	0	0	0	0
Actr3	5	0	0	0	0	0	0
Gm14000	2	0	0	0	0	0	0
Ltv1	5	4	0	0	0	0	0
Gm14284	1	0	0	0	0	0	0
Ablim2	0	7	0	0	0	0	0
Gm12319	0	1	0	0	0	0	0
Gm7856	0	3	0	0	0	0	0
Gm4524	0	1	0	0	0	0	0
Wdr12	6	0	0	0	0	0	0
A230009B12Rik	5	0	0	0	0	0	0
Samd8	10	0	0	0	0	0	0
AU015336	0	1	0	0	0	0	0
Ap3s2	9	24	0	0	0	0	0
Abcb4	1	0	0	0	0	0	0
Cmtm2b	3	0	0	0	0	0	0
Dedd	1	5	13	0	0	0	0
Fdxr	2	0	0	0	0	0	0
Gm16364	5	0	0	0	0	0	0
Zfp536	2	0	0	0	0	0	0
Atp6v0a2	8	0	0	0	0	0	0
Pcif1	0	3	0	0	0	0	0
Noxa1	0	2	0	0	0	0	0
Kank3	0	2	0	0	0	0	0
Camk2n1	1	11	0	0	0	0	0
Elane	2	0	0	0	0	0	0
Ttc30b	2	0	0	0	0	0	0
Aip	5	16	0	0	0	0	0
Rgs14	0	4	0	0	0	0	0
Gm5809	2	0	0	0	0	0	0
Gm10136	2	0	0	0	0	0	0
Ampd2	5	0	0	0	0	0	0
Ftsj3	11	0	0	0	0	0	0
AC151602.1	5	2	0	0	0	0	0
Gm11965	1	0	0	0	0	0	0
Lta4h	4	0	0	0	0	0	0
Tmeff1	25	0	0	0	0	0	0
Dazl	3	0	0	0	0	0	0
Rad9b	0	1	0	0	0	0	0
Epb4.1	10	0	0	0	0	0	0
Fam83h	1	2	0	0	0	0	0
Gm6257	0	1	0	0	0	0	0
Serinc2	0	0	6	0	0	0	0
Josd2	7	0	0	0	0	0	0
Donson	0	5	0	0	0	0	0
Tspan9	20	4	0	0	0	0	0
2010111I01Rik	14	0	0	0	0	0	0
Gm10767	3	0	0	0	0	0	0
Zscan2	0	20	0	0	0	0	0
Gltp	0	4	0	0	0	0	0
Adar	5	0	3	0	0	0	0
Myom3	1	0	0	0	0	0	0
Tnfrsf19	5	0	0	0	0	0	0
Ash1l	10	6	3	0	0	0	0
Atoh8	6	0	0	0	0	0	0
Limk1	2	0	0	0	0	0	0
Timm50	20	0	0	0	0	0	0
Lrfn4	3	6	0	0	0	0	0
Grb2	15	2	0	0	0	0	0
1700116B05Rik	2	0	0	0	0	0	0
Rbm6	0	15	0	0	0	0	0
Mrps23	29	19	0	0	0	0	0
Gm12985	4	0	0	0	0	0	0
Vezt	1	0	0	0	0	0	0
Gm5054	0	1	0	0	0	0	0
Gm16740	3	1	0	0	0	0	0
Prkci	2	0	0	0	0	0	0
Suox	3	0	0	0	0	0	0
Filip1l	11	0	0	0	0	0	0
D6Mm5e	2	0	0	0	0	0	0
Sri	0	0	0	0	0	2	0
[truncated: 8,592 more rows]

## Sheet: 7b_BPA.lo 10µg
Supplemental Table 7b: Enhancer peaks linked to DEGs for 'BPA.lo 10µg over Veh' comparison (Figure 5)
Number of peaks in enhancers (for each histone mark) linked to DEGs (Enhancer Atlas, merged anchors)
Genes	Peak count for H3K27ac up peaks	Peak count for H3K4me1 up peaks	Peak count for H3K4me3 up peaks	M_liver_5mo_BPA.lo 10ug.over.VEH	Peak count for H3K27ac down peaks	Peak count for H3K4me1 down peaks	Peak count for H3K4me3 down peaks
Sult1e1	0	0	0	2.99272	0	0	0
Orm2	1	0	0	2.61423	0	0	0
Saa3	0	0	0	2.36027	0	0	0
Saa1	0	0	0	1.81181	0	0	0
Enho	9	0	0	1.70025	0	0	0
Orm3	1	0	0	1.63413	0	0	0
Slc22a26	0	0	0	1.60592	0	0	0
Moxd1	0	0	0	1.58374	0	0	0
Prtn3	0	0	0	1.54633	4	0	0
Cenpm	7	0	0	1.52515	0	0	0
Saa2	0	0	0	1.4559	0	0	0
Tff3	0	0	0	1.41037	0	0	0
Gldn	0	0	0	1.30719	0	0	0
Cyp2b9	0	0	0	1.29937	0	0	0
Mmd2	7	0	0	1.28571	0	0	0
Cxcl1	0	0	0	1.26023	0	0	0
Mup18	0	0	0	1.2598	0	0	0
Lcn2	1	0	1	1.24645	0	0	0
Cxcl14	0	0	7	1.22943	1	0	0
Fam81a	11	0	0	1.1635	0	0	0
Cyp2a4	0	0	0	1.16038	0	0	0
Dbp	0	0	0	1.15828	0	0	0
Mup1	0	0	0	1.15671	0	0	0
Eno1b	0	0	0	1.15137	0	0	0
Fam83f	0	0	0	1.11743	0	0	0
Ntrk2	0	0	0	1.09983	0	0	0
Col5a2	0	0	0	1.09449	0	0	0
Slc13a5	3	0	0	1.09355	1	0	0
Asns	0	0	0	1.09138	0	0	0
Pcdh20	0	0	0	1.09077	0	0	0
Hpx	0	0	0	1.02428	0	0	0
Per3	0	0	0	0.973992	0	0	0
Arl4d	0	0	0	0.967463	0	0	0
Fgfr1	0	0	0	0.963165	0	0	0
Fam25c	0	0	0	0.960412	0	0	0
Smpd3	0	0	0	0.945581	0	0	0
Cirbp	0	0	0	0.907889	2	0	0
Serpina1e	0	0	0	0.901454	0	0	0
Osgin1	0	0	0	0.876259	0	0	0
Nrep	0	0	0	0.863582	0	0	0
Gucy2c	0	0	0	0.849702	1	0	0
Dnajc12	3	0	0	0.844344	0	0	0
Rbp1	0	0	0	0.82165	0	0	0
Ccdc85b	0	0	0	0.809331	0	0	0
Junb	0	0	0	0.789823	0	0	0
Scand1	3	0	0	0.789514	0	0	0
Noct	0	0	0	0.777505	0	0	0
Pcbp4	0	0	0	0.77638	0	0	0
Per2	0	0	0	0.770471	0	0	0
Extl1	0	0	0	0.761993	0	0	0
Tmem86a	0	0	0	0.758113	0	0	0
Aldh1b1	0	0	0	0.75106	0	0	0
Cfb	0	0	0	0.744393	0	0	0
Cyb561	0	0	0	0.743471	0	0	0
Csad	0	0	0	0.736768	0	0	0
Coq8b	0	0	0	0.731559	0	0	0
Zap70	0	0	0	0.730885	0	0	0
Slc13a3	0	0	0	0.723512	0	0	0
Selenbp2	0	0	0	0.715507	0	0	0
Nudt18	0	0	0	0.70223	0	0	0
Mup17	0	0	0	0.700924	0	0	0
Ciart	0	0	0	0.698703	0	0	0
Socs3	0	0	0	0.696733	0	0	0
Hes6	0	0	0	0.682039	0	0	0
Slc5a6	0	0	0	0.675625	0	0	0
Slc22a7	0	0	0	0.673623	0	0	0
Tspan4	0	0	0	0.672595	0	0	0
Igfals	0	0	0	0.669293	0	0	0
Sdsl	0	0	0	0.665474	0	0	0
Abcg5	0	0	0	0.654067	0	0	0
Ttc36	0	0	0	0.651954	0	0	0
Usp2	0	0	0	0.647793	0	0	0
Srebf1	0	0	0	0.644126	0	0	0
Pabpn1	0	0	0	0.634358	0	0	0
Tef	2	0	0	0.63429	0	0	0
Cebpb	0	0	0	0.631403	0	0	0
Erf	0	0	0	0.613133	0	0	0
Nr2f6	0	0	0	0.612727	0	0	0
Rbm3	0	0	0	0.60098	0	0	0
Ddit4	0	0	0	0.58687	0	0	0
Mrpl11	2	0	0	0	0	0	0
Cnnm4	1	0	0	0	0	0	0
Bola3	0	0	0	0	3	0	0
Gm15567	8	0	0	0	1	0	0
Vsig10l	1	0	0	0	0	0	0
Gm14496	0	0	0	0	1	0	0
Mrrf	0	0	0	0	3	0	0
Rbm6	0	0	0	0	1	0	0
Tcof1	4	0	0	0	0	0	0
Rab11fip4	3	0	0	0	0	0	0
Fer1l4	2	0	0	0	0	0	0
Dusp11	1	0	0	0	0	0	0
St6galnac4	1	0	1	0	0	0	0
Rspry1	1	0	0	0	0	0	0
Pnma1	0	0	0	0	7	0	0
Ccdc90a	0	0	0	0	2	0	0
Fam166a	17	0	0	0	0	0	0
Dnajc30	0	0	0	0	2	0	0
Cyp2f2	11	0	0	0	9	0	0
Cs	0	0	0	0	3	0	0
Atp5b	0	0	0	0	3	0	0
Cobra1	17	0	0	0	0	0	0
Pgk2	0	0	0	0	3	0	0
Gm17083	0	0	0	0	3	0	0
Samd10	0	0	0	0	10	0	0
9030204H09Rik	0	0	0	0	1	0	0
Pcmtd2	0	0	0	0	34	0	0
Gm17685	0	0	0	0	0	0	2
Slc4a2	0	0	0	0	14	0	0
Dctn4	14	0	0	0	0	0	0
Snrpg	31	0	0	0	0	0	0
Neurl3	11	0	0	0	0	0	0
Cd83	0	0	0	0	3	0	0
Mmp19	0	0	0	0	1	0	0
Amigo3	0	0	0	0	1	0	0
Ccdc25	0	0	0	0	18	0	0
Ykt6	0	0	0	0	5	0	0
Arid4a	0	0	0	0	3	0	0
Itgae	0	0	0	0	1	0	0
3110009E18Rik	0	0	0	0	1	0	0
Gm15737	0	0	0	0	2	0	0
Gm3851	0	0	0	0	1	0	0
Mir3101	1	0	0	0	0	0	0
2700049A03Rik	0	0	0	0	1	0	0
Uckl1	0	0	0	0	12	0	0
Gm12840	0	0	0	0	1	0	0
Clcf1	12	0	0	0	0	0	0
Gm11967	0	0	0	0	1	0	0
Synpo	16	0	0	0	0	0	0
Taf7l	1	0	0	0	0	0	0
Taok3	0	0	3	0	0	0	0
Pkia	0	0	3	0	0	0	0
Tex19.2	1	0	0	0	0	0	0
Tor2a	1	0	1	0	0	0	0
Krtap11	1	0	0	0	0	0	0
Apc	0	0	0	0	3	0	0
Gm16295	0	0	0	0	1	0	0
Slc25a39	0	0	0	0	8	0	0
Camk2g	0	0	1	0	0	0	0
Ciapin1	1	0	0	0	0	0	0
Gm8618	0	0	0	0	3	0	0
Traf2	6	0	0	0	0	0	0
Sele	1	0	0	0	0	0	0
C130039O16Rik	0	0	0	0	9	0	0
Sox18	0	0	0	0	2	0	0
Helq	6	0	0	0	0	0	0
Pppde2	4	0	0	0	0	0	0
Srp14	0	0	0	0	5	0	0
Sh2b3	2	0	0	0	0	0	0
Iigp1	2	0	0	0	0	0	0
Rsph3b	0	0	0	0	6	0	0
Tmem210	5	0	0	0	0	0	0
2810432D09Rik	9	0	0	0	0	0	0
Gsn	0	0	0	0	21	0	0
Golga2	1	0	1	0	0	0	0
Ube2i	1	0	0	0	0	0	0
Armcx6	1	0	0	0	0	0	0
Jmjd8	1	0	0	0	0	0	0
C030044B11Rik	0	0	0	0	3	0	0
Mamdc4	5	0	0	0	0	0	0
Prrc2b	1	0	1	0	0	0	0
SNORD24	2	0	0	0	0	0	0
Gzmm	0	0	0	0	4	0	0
Sirt4	0	0	0	0	7	0	0
Zfpm1	0	0	0	0	1	0	0
Pygb	0	0	0	0	1	0	0
Il3	0	0	0	0	5	0	0
Rps6ka2	0	0	0	0	1	0	0
Rpn2	2	0	0	0	0	0	0
Atpbd4	0	0	0	0	0	1	0
Tnfrsf9	0	0	0	0	1	0	0
Slc22a5	0	0	0	0	31	0	0
Agap3	0	0	0	0	14	0	0
Bag5	0	0	0	0	2	0	0
Rrp36	0	0	9	0	0	0	0
Ptpdc1	0	0	0	0	1	0	0
Abcf1	0	0	0	0	1	0	0
Ncoa6	1	0	0	0	0	0	0
Gm11965	0	0	0	0	1	0	0
Mdn1	1	0	0	0	0	0	0
Mogs	0	0	0	0	8	0	0
Sfrp1	0	0	0	0	8	0	0
Gm16046	5	0	0	0	0	0	0
Ssfa2	3	0	0	0	0	0	0
Ghrl	0	0	0	0	3	0	0
Anapc2	17	0	0	0	0	0	0
Rps26	0	0	0	0	2	0	0
Lin52	0	0	0	0	1	0	0
Timeless	0	0	0	0	3	0	0
Nme7	1	0	0	0	0	0	0
Pmel	0	0	0	0	1	0	0
Myo1e	6	0	0	0	0	0	0
Pitpnm1	4	0	0	0	0	0	0
Etfb	2	0	0	0	0	0	0
Acot4	0	0	0	0	5	0	0
Gm11745	2	0	0	0	0	0	0
Gm15815	0	0	0	0	3	0	0
Gm16113	0	0	0	0	3	0	0
Afap1l2	3	0	0	0	0	0	0
Zfp410	0	0	0	0	5	0	0
Itpkc	16	0	0	0	10	0	0
1700001O22Rik	0	0	0	0	2	0	0
Gm17334	0	0	0	0	15	0	0
Atp2b2	0	0	0	0	4	0	0
Sertad3	9	0	0	0	5	0	0
Best3	2	0	0	0	0	0	0
Hmgn3	1	0	0	0	0	0	0
Lyrm1	0	0	0	0	3	0	0
Arrb1	0	0	0	0	1	0	0
Hck	4	0	0	0	0	0	0
Gm16685	0	0	2	0	0	0	0
Trim59	5	0	0	0	0	0	0
Gm16989	1	0	0	0	0	0	0
Armcx4	1	0	0	0	0	0	0
Ctnna1	1	0	0	0	0	0	0
Gla	2	0	0	0	0	0	0
Dalrd3	0	0	0	0	1	0	0
Nub1	0	0	0	0	10	0	0
Als2cr4	0	0	2	0	0	0	0
Nme4	1	0	0	0	0	0	0
BC020535	1	0	0	0	0	0	0
Rap1b	1	0	0	0	0	0	0
Atp1a1	10	0	0	0	0	0	0
Dpp7	15	0	0	0	0	0	0
Gm17552	1	0	0	0	0	0	0
SCARNA15	1	0	0	0	0	0	0
Gm5436	0	0	0	0	6	0	0
Rbm4b	8	0	0	0	0	0	0
Gm11792	1	0	0	0	0	0	0
Faim2	1	0	0	0	0	0	0
Ankrd55	0	0	0	0	4	0	0
Grn	0	0	0	0	6	0	0
Klk15	1	0	0	0	0	0	0
Gm20545	0	0	0	0	1	0	0
Wdr54	0	0	0	0	9	0	0
Gm14121	0	0	0	0	1	0	0
Cyp2d22	5	0	0	0	0	0	0
Tmem208	0	0	0	0	3	0	0
Gm8773	2	0	0	0	0	0	0
Nupl2	0	0	0	0	3	0	0
Rpl41	0	0	0	0	3	0	0
Cct2	18	0	0	0	0	0	0
Slc22a19	0	0	0	0	2	0	0
Cxxc5	1	0	0	0	0	0	0
Gm13194	4	0	0	0	0	0	0
Pnoc	0	0	0	0	1	0	0
Abcf2	0	0	0	0	15	0	0
SNORA76	1	0	0	0	0	0	0
Mettl7a1	4	0	0	0	0	0	0
Fam161b	0	0	0	0	2	0	0
Cldn18	0	0	0	0	1	0	0
Aco2	2	0	0	0	0	0	0
Tdrd1	3	0	0	0	0	0	0
Papss2	0	0	0	0	1	0	0
Slc35e3	1	0	0	0	0	0	0
Dab2ip	0	0	0	0	39	0	0
Npdc1	12	0	0	0	0	0	0
1700026L06Rik	0	0	0	0	1	0	0
Acot5	0	0	0	0	5	0	0
Dlat	0	0	0	0	1	0	0
Smok4a	8	0	0	0	0	0	0
Brd3	4	0	0	0	0	0	0
Hcn2	0	0	0	0	4	0	0
Sec22a	0	0	0	0	1	0	0
Snrpa	14	0	0	0	10	0	0
1110008P14Rik	1	0	1	0	0	0	0
Gm12224	0	0	0	0	2	0	0
Bcl2l13	1	0	0	0	0	0	0
Rhbdl1	1	0	0	0	0	0	0
Il23a	0	0	0	0	1	0	0
Gm11972	0	0	0	0	1	0	0
Hes1	0	0	0	0	2	0	0
Ttc9b	3	0	0	0	0	0	0
Gm13835	0	0	0	0	4	0	0
Tifab	0	0	4	0	1	0	0
Qk	5	0	0	0	0	0	0
Gm16437	0	0	0	0	2	0	0
Klhdc4	0	0	0	0	1	0	0
Gatsl3	0	0	0	0	2	0	0
Ggta1	0	0	0	0	30	0	0
Mrfap1	0	0	0	0	1	0	0
Mrpl2	0	0	6	0	0	0	0
Fam171a2	0	0	0	0	7	0	0
4921517L17Rik	2	0	0	0	0	0	0
Rbbp5	3	0	0	0	0	0	0
Casp8ap2	1	0	0	0	0	0	0
Myl6	0	0	0	0	2	0	0
Dck	0	0	0	0	2	0	0
Mmp21	0	0	3	0	0	0	0
Srsf2	1	0	0	0	0	0	0
C230081A13Rik	0	0	0	0	1	0	0
Rangrf	0	0	0	0	1	0	0
Gfod2	0	0	0	0	1	0	0
Dzip1l	0	0	0	0	2	0	0
Plekhg5	0	0	0	0	7	0	0
Aif1l	1	0	1	0	0	0	0
Ccnd1	0	0	0	0	0	0	5
Gm9746	5	0	0	0	0	0	0
Acot3	0	0	0	0	7	0	0
RP24	4	0	0	0	0	0	0
Vsig10	0	0	2	0	0	0	0
Zfp658	3	0	0	0	0	0	0
Gm15757	0	0	0	0	1	0	0
Mlxipl	0	0	0	0	1	0	0
Il17re	0	0	0	0	1	0	0
Gm12858	0	0	0	0	1	0	0
Lox	0	0	0	0	1	0	0
Rpl17	0	0	0	0	1	0	0
Ptprcap	8	0	0	0	0	0	0
Timm8a1	1	0	0	0	0	0	0
Cstf2	1	0	0	0	0	0	0
Stom	0	0	0	0	33	0	0
Apitd1	0	0	0	0	3	0	0
Pdgfrb	1	0	0	0	0	0	0
Trank1	2	0	0	0	0	0	0
Zzz3	0	0	0	0	5	0	0
Wdr24	1	0	0	0	0	0	0
Gm8841	0	0	0	0	2	0	0
Gm16278	1	0	0	0	0	0	0
Commd1	1	0	0	0	0	0	0
Rbpms	4	0	0	0	0	0	0
Exoc3l	0	0	0	0	1	0	0
Gng13	1	0	0	0	0	0	0
8430429K09Rik	0	0	0	0	8	0	0
Ddx5	8	0	0	0	0	0	0
Zc3hc1	0	0	0	0	2	0	0
Gm11365	0	0	0	0	1	0	0
Smarcc2	0	0	0	0	3	0	0
Vash2	0	0	0	0	1	0	0
Trmt61a	0	0	0	0	2	0	0
AC160118.1	0	0	0	0	1	0	0
Vmn1r54	1	0	0	0	0	0	0
Slc25a25	1	0	1	0	0	0	0
Ggt6	1	0	0	0	2	0	0
Bnip2	14	0	0	0	0	0	0
Bet1	0	0	0	0	1	0	0
Ptbp1	0	0	0	0	3	0	0
1700013G24Rik	0	0	0	0	2	0	0
Vps18	0	0	0	0	1	0	0
Gnmt	0	0	10	0	0	0	0
2410016O06Rik	0	0	0	0	5	0	0
Gins4	0	0	0	0	20	0	0
Gm12216	0	0	0	0	8	0	0
Adamtsl2	1	0	0	0	1	0	0
Zfp750	1	0	0	0	0	0	0
Esyt1	0	0	0	0	3	0	0
Med22	0	0	0	0	1	0	0
7SK	7	0	2	0	6	0	0
Anp32b	1	0	0	0	0	0	0
Higd1a	3	0	0	0	0	0	0
Mir1191	6	0	0	0	3	0	0
Rce1	10	0	0	0	0	0	0
Gm15766	0	0	0	0	1	0	0
Gls2	0	0	0	0	3	0	0
1700104B16Rik	1	0	0	0	0	0	0
Elp3	0	0	0	0	7	0	0
Gpx4	0	0	0	0	5	0	0
Fam73a	0	0	0	0	4	0	0
Mrpl53	0	0	0	0	5	0	0
Gm14016	0	0	0	0	1	0	0
Gm13446	0	0	0	0	11	0	0
Ggt7	1	0	0	0	0	0	0
Fam173a	1	0	0	0	0	0	0
Cyp51	0	0	0	0	2	0	0
Cnot2	1	0	0	0	0	0	0
Erp27	3	0	0	0	0	0	0
Vcl	0	0	1	0	0	0	0
Gm10355	1	0	0	0	0	0	0
Apeh	0	0	0	0	1	0	0
Pebp1	0	0	3	0	0	0	0
Gm11697	1	0	0	0	0	0	0
Ergic3	5	0	0	0	0	0	0
F7	2	0	0	0	0	0	0
Mdm2	1	0	0	0	0	0	0
Gm20546	0	0	0	0	1	0	0
Nsun7	0	0	0	0	1	0	0
Rad9	12	0	0	0	0	0	0
SNORA48	2	0	0	0	0	0	0
Gm1661	0	0	0	0	1	0	0
Sec14l3	0	0	0	0	2	0	0
Duxbl	1	0	0	0	0	0	0
Gm12225	0	0	0	0	5	0	0
Pla2g12a	2	0	0	0	0	0	0
Suox	0	0	0	0	2	0	0
Mageb16	0	0	0	0	1	0	0
6330416G13Rik	1	0	0	0	0	0	0
1300014I06Rik	0	0	0	0	2	0	0
AL732525.2	1	0	0	0	0	0	0
Gm6485	0	0	1	0	0	0	0
Fpgs	1	0	1	0	0	0	0
F830104G03Rik	0	0	0	0	1	0	0
Tmbim4	0	0	0	0	1	0	0
Tmem134	9	0	0	0	0	0	0
Gm14257	1	0	0	0	0	0	0
Gm15996	0	0	0	0	1	0	0
Ripk1	1	0	0	0	11	0	0
Gm12223	0	0	0	0	2	0	0
Rangap1	2	0	0	0	0	0	0
SCARNA14	0	0	0	0	1	0	0
Mir486	0	0	0	0	3	0	0
Abcb11	0	0	1	0	0	0	0
Mbd1	0	0	0	0	0	2	0
Spnb3	7	0	0	0	0	0	0
Anxa11	13	0	0	0	0	0	0
Ccdc109b	1	0	0	0	0	0	0
Tmcc2	2	0	0	0	0	0	0
A330041J22Rik	0	0	0	0	1	0	0
Exd2	2	0	0	0	0	0	0
Mtap1b	0	0	0	0	1	0	0
Rnf41	0	0	0	0	3	0	0
Gm996	4	0	0	0	0	0	0
Tex19.1	1	0	0	0	0	0	0
4930455F23Rik	1	0	0	0	0	0	0
Bdp1	0	0	0	0	10	0	0
Gm13983	0	0	0	0	1	0	0
Gm16342	0	0	0	0	2	0	0
Scarna3b	1	0	0	0	0	0	0
Mxd1	33	0	0	0	0	0	0
Ift80	4	0	0	0	0	0	0
9430097D07Rik	1	0	1	0	0	0	0
Bambi	0	0	0	0	1	0	0
Rep15	0	0	0	0	4	0	0
Prkar2a	0	0	0	0	1	0	0
Numb	0	0	0	0	11	0	0
Serpinb6a	1	0	0	0	11	0	0
Acaa2	0	0	0	0	0	2	0
Arid5a	7	0	0	0	0	0	0
Larp4	3	0	0	0	0	0	0
Gm16256	1	0	0	0	0	0	0
Chchd1	0	0	1	0	0	0	0
Gm13008	2	0	0	0	0	0	0
2310039H08Rik	0	0	11	0	0	0	0
Hyi	0	0	0	0	3	0	0
Axin2	0	0	0	0	1	0	0
Vegfa	0	0	0	0	3	0	0
1810058N05Rik	0	0	0	0	2	0	0
Eri3	0	0	0	0	4	0	0
Gm16112	0	0	0	0	1	0	0
Vil1	0	0	0	0	0	0	2
Gabbr2	3	0	0	0	0	0	0
Agrp	0	0	0	0	2	0	0
Gm10472	0	0	0	0	2	0	0
Gm15968	0	0	0	0	2	0	0
Gm11812	0	0	0	0	1	0	0
Purg	2	0	0	0	0	0	0
Parvb	0	0	0	0	2	0	0
Dip2b	4	0	0	0	0	0	0
Eif2b3	0	0	0	0	2	0	0
Gm9840	0	0	0	0	1	0	0
4732463B04Rik	0	0	0	0	3	0	0
2500004C02Rik	2	0	0	0	0	0	0
A330017A19Rik	0	0	4	0	0	0	0
Herc4	3	0	0	0	0	0	0
Gm20478	0	0	0	0	1	0	0
Cox6a1	0	0	0	0	16	0	0
Csdc2	1	0	0	0	0	0	0
Naa40	0	0	0	0	2	0	0
Tjap1	0	0	0	0	3	0	0
Rps14	18	0	0	0	0	0	0
Tmem198b	0	0	0	0	1	0	0
Gm11964	0	0	0	0	1	0	0
Nmnat2	0	0	0	0	2	0	0
Pigf	7	0	0	0	2	0	0
Stx8	0	0	0	0	1	0	0
Abca9	3	0	0	0	0	0	0
2310022A10Rik	6	0	0	0	7	0	0
Dync1i2	2	0	0	0	0	0	0
Dkk3	0	0	0	0	6	0	0
Car6	0	0	0	0	1	0	0
Tsga13	0	0	0	0	2	0	0
Rilpl1	0	0	1	0	0	0	0
En2	0	0	0	0	1	0	0
Gmppb	0	0	0	0	1	0	0
Pitx1	0	0	2	0	0	0	0
Abcb8	0	0	0	0	15	0	0
Drg1	0	0	0	0	56	0	0
Rere	0	0	0	0	10	0	0
Ccdc6	0	0	0	0	5	0	0
AC122218.1	1	0	0	0	0	0	0
Carns1	5	0	0	0	0	0	0
Hmgcl	3	0	0	0	0	0	0
Btf3	0	0	0	0	10	0	0
Lctl	0	0	0	0	2	0	0
Rnf220	0	0	0	0	5	0	0
Kbtbd13	12	0	12	0	0	0	0
Gde1	1	0	0	0	0	0	0
Arsg	1	0	0	0	0	0	0
Clu	0	0	0	0	11	0	0
Slc24a1	5	0	5	0	0	0	0
Crisp1	0	0	0	0	1	0	0
Dolpp1	0	0	0	0	2	0	0
Hnf1a	0	0	0	0	1	0	0
Coq10a	0	0	0	0	3	0	0
9230114K14Rik	1	0	0	0	0	0	0
Cyp2d10	2	0	0	0	0	0	0
Ak1	1	0	1	0	0	0	0
Metrn	1	0	0	0	0	0	0
Trim39	0	0	0	0	6	0	0
Gm5239	2	0	0	0	0	0	0
Sowahc	4	0	0	0	0	0	0
Gm16110	0	0	0	0	1	0	0
Fam101a	0	0	3	0	0	0	0
Cdk15	0	0	1	0	0	0	0
Actr1b	1	0	0	0	0	0	0
Cilp	11	0	11	0	0	0	0
Rnf207	0	0	0	0	3	0	0
Slc22a23	1	0	0	0	10	0	0
Coro1b	17	0	0	0	0	0	0
Sft2d2	2	0	0	0	0	0	0
Nicn1	0	0	0	0	1	0	0
Klk1b11	1	0	0	0	0	0	0
1700003E16Rik	0	0	0	0	4	0	0
Vamp3	0	0	0	0	1	0	0
Phip	1	0	0	0	0	0	0
Gm17029	0	0	0	0	2	0	0
ORF61	0	0	0	0	3	0	0
Chka	1	0	0	0	0	0	0
Akap2	0	0	0	0	10	0	0
Madcam1	0	0	0	0	3	0	0
Tns1	0	0	0	0	0	0	12
Ptk7	0	0	5	0	0	0	0
Ostb	2	0	2	0	0	0	0
Slc25a26	2	0	0	0	0	0	0
Gm10043	0	0	0	0	13	0	0
2010003K11Rik	10	0	0	0	0	0	0
Magi1	1	0	0	0	0	0	0
Jam2	1	0	0	0	0	0	0
Gm15154	1	0	0	0	0	0	0
Pdxk	6	0	0	0	0	0	0
U5	2	0	2	0	0	0	0
Fam187a	0	0	0	0	2	0	0
Tmem183a	0	0	0	0	8	0	0
A730049H05Rik	0	0	0	0	2	0	0
Gm11705	1	0	0	0	0	0	0
Uchl4	0	0	0	0	4	0	0
Fam109b	2	0	0	0	0	0	0
Neurod1	6	0	0	0	0	0	0
Bbs2	1	0	0	0	0	0	0
Srm	0	0	0	0	2	0	0
Scara3	0	0	0	0	6	0	0
Cdk2ap2	13	0	0	0	0	0	0
Pecam1	8	0	0	0	0	0	0
Sipa1l1	0	0	0	0	1	0	0
Gm514	3	0	3	0	0	0	0
0610038P03Rik	1	0	0	0	0	0	0
Psmc5	1	0	0	0	0	0	0
Crygn	0	0	0	0	5	0	0
Slc19a2	1	0	0	0	0	0	0
Atp13a4	0	0	0	0	1	0	0
AI464131	8	0	0	0	0	0	0
Sumo1	0	0	2	0	0	0	0
Synpo2l	0	0	1	0	0	0	0
Gm15459	1	0	0	0	0	0	0
Gm13205	0	0	0	0	2	0	0
Wsb1	6	0	3	0	0	0	0
Nfasc	2	0	0	0	0	0	0
Nudt8	1	0	0	0	0	0	0
Loxl3	0	0	0	0	8	0	0
Traip	0	0	0	0	1	0	0
Trpc4ap	5	0	0	0	0	0	0
Blvrb	11	0	0	0	10	0	0
Atp2a3	0	0	0	0	1	0	0
Gm960	1	0	0	0	0	0	0
Snord104	1	0	0	0	0	0	0
Gm14279	4	0	0	0	0	0	0
Gm16311	0	0	0	0	2	0	0
Hsd11b2	0	0	0	0	1	0	0
Atp1b1	1	0	0	0	0	0	0
Scaf11	5	0	0	0	0	0	0
Egf	1	0	0	0	0	0	0
Dbh	1	0	0	0	0	0	0
Gm11955	0	0	0	0	7	0	0
Banp	0	0	0	0	1	0	0
Cpne2	1	0	0	0	0	0	0
Disp2	0	0	0	0	4	0	0
Kpna2	7	0	0	0	0	0	0
Lekr1	5	0	0	0	0	0	0
Gm1604b	0	0	0	0	1	0	0
Usp37	0	0	0	0	0	0	4
Chl1	0	0	0	0	5	0	0
Abhd11	0	0	0	0	2	0	0
Ube2r2	3	0	0	0	0	0	0
Olfr1342	0	0	0	0	1	0	0
Asxl1	5	0	0	0	0	0	0
Cenpt	0	0	0	0	1	0	0
Gm17782	0	0	0	0	2	0	0
Rbm28	1	0	0	0	0	0	0
Eif4enif1	0	0	0	0	55	0	0
2010001M06Rik	0	0	0	0	1	0	0
Selp	1	0	0	0	0	0	0
BC049715	1	0	0	0	3	0	0
Gm17336	0	0	0	0	1	0	0
Mlh1	8	0	0	0	0	0	0
Psmc6	4	0	0	0	0	0	0
Ppfia4	0	0	0	0	7	0	0
Gm13443	0	0	0	0	18	0	0
Ccl27a	8	0	0	0	0	0	0
Gm18588	3	0	0	0	0	0	0
Pak6	0	0	0	0	4	0	0
Gm14122	0	0	0	0	1	0	0
Atp6v0a4	2	0	0	0	0	0	0
Slc30a7	0	0	0	0	2	0	0
Zfp719	4	0	0	0	0	0	0
5430417L22Rik	0	0	0	0	2	0	0
Proz	1	0	0	0	0	0	0
Gm16934	4	0	0	0	0	0	0
Csnk1d	1	0	0	0	0	0	0
Gcnt3	9	0	0	0	0	0	0
Parvg	0	0	0	0	4	0	0
Ndor1	16	0	0	0	0	0	0
Rab5b	0	0	0	0	1	0	0
Slc22a15	3	0	0	0	0	0	0
Gm10397	2	0	0	0	0	0	0
Cryab	0	0	0	0	1	0	0
Als2	0	0	2	0	0	0	0
2010317E24Rik	10	0	0	0	0	0	0
Gm13832	0	0	0	0	1	0	0
Ctdsp1	0	0	0	0	0	0	12
Rtn3	0	0	0	0	2	0	0
Gm17568	0	0	0	0	2	0	0
Gm13559	7	0	0	0	0	0	0
Golga7	0	0	0	0	22	0	0
4931417G12Rik	0	0	0	0	1	0	0
Rnf123	0	0	0	0	1	0	0
Errfi1	0	0	0	0	7	0	0
Gfap	0	0	0	0	8	0	0
Ccdc103	0	0	0	0	7	0	0
Gm1614	2	0	0	0	0	0	0
Gm11032	0	0	0	0	3	0	0
C330006K01Rik	6	0	0	0	0	0	0
Ak8	0	0	0	0	2	0	0
Gnptg	1	0	0	0	0	0	0
Pou2af1	0	2	0	0	0	0	0
Mrps18c	5	0	0	0	0	0	0
Gm17734	0	0	0	0	1	0	0
Mrpl50	0	0	1	0	0	0	0
Pomt1	1	0	1	0	0	0	0
Cno	0	0	0	0	3	0	0
Fer1l5	3	0	0	0	0	0	0
Gmcl1	29	0	0	0	0	0	0
Spag1	3	0	0	0	0	0	0
Wasf3	0	0	4	0	0	0	0
Tacc1	0	0	0	0	0	1	0
Kpna4	5	0	0	0	0	0	0
Cldn3	0	0	0	0	2	0	0
H2afj	4	0	0	0	3	0	0
Calm2	12	0	0	0	16	0	0
Ikbkb	0	0	0	0	3	0	0
Midn	0	0	0	0	3	0	0
Hsd17b6	0	0	0	0	1	0	0
E2f4	0	0	0	0	3	0	0
Gm17632	0	0	0	0	1	0	0
BC024582	1	0	0	0	0	0	0
Gm12827	0	0	0	0	1	0	0
Myst3	0	0	0	0	19	0	0
Akr1d1	5	0	0	0	0	0	0
Gm9964	2	0	2	0	0	0	0
Oaz2	1	0	1	0	0	0	0
Ninl	0	0	0	0	1	0	0
Chtf18	1	0	0	0	0	0	0
Gm15756	4	0	0	0	0	0	0
Pkp4	1	0	0	0	0	0	0
Mtfp1	0	0	0	0	9	0	0
Ccnl1	13	0	0	0	0	0	0
BC029214	5	0	0	0	0	0	0
Gm8818	0	0	0	0	2	0	0
Sec14l2	0	0	0	0	9	0	0
Ap3m2	0	0	0	0	12	0	0
Dnaic1	3	0	0	0	0	0	0
Prps1	2	0	0	0	0	0	0
Gbgt1	0	0	0	0	2	0	0
Dnajc14	0	0	0	0	1	0	0
Gm14142	0	0	0	0	1	0	0
Lrfn4	13	0	0	0	0	0	0
Cabp1	0	0	0	0	13	0	0
Gm2885	0	0	0	0	1	0	0
Dag1	0	0	0	0	1	0	0
Gm13826	0	0	0	0	15	0	0
Mpl	0	0	0	0	1	0	0
Ccdc117	0	0	0	0	3	0	0
Ptrh1	1	0	1	0	0	0	0
Dqx1	0	0	0	0	9	0	0
Ccdc76	0	0	0	0	3	0	0
Paip2	2	0	0	0	0	0	0
Rab11a	11	0	11	0	0	0	0
Snx18	3	0	0	0	0	0	0
Ctnna3	2	0	0	0	0	0	0
Slc6a12	1	0	0	0	0	0	0
Tmem63b	0	0	0	0	1	0	0
Ppap2c	0	0	0	0	2	0	0
Gm14126	0	0	0	0	1	0	0
Mir763	0	0	0	0	1	0	0
Acaa1b	0	0	0	0	1	0	0
Gm15883	2	0	0	0	1	0	0
Caml	0	0	2	0	0	0	0
Hpse	6	0	0	0	0	0	0
Gm11718	1	0	0	0	0	0	0
Mrps24	0	0	0	0	7	0	0
3110056K07Rik	0	0	0	0	1	0	0
Fgd3	0	0	0	0	2	0	0
Urod	0	0	0	0	1	0	0
Ube2k	0	0	0	0	7	0	0
Ciz1	1	0	1	0	0	0	0
Gtpbp10	2	0	0	0	0	0	0
D1Pas1	0	0	0	0	1	0	0
Nrap	4	0	0	0	0	0	0
Gm15978	3	0	0	0	2	0	0
Rrp1b	13	0	0	0	0	0	0
Mllt4	8	0	0	0	0	0	0
1110049F12Rik	3	0	0	0	0	0	0
Ern1	7	0	0	0	0	0	0
Palm	0	0	0	0	3	0	0
Gm13829	0	0	0	0	8	0	0
Ndufs8	4	0	0	0	0	0	0
Pigq	1	0	0	0	0	0	0
Klhl7	0	0	0	0	3	0	0
Ppm1l	1	0	0	0	0	0	0
Snord16a	0	0	0	0	1	0	0
SNORD16	0	0	0	0	1	0	0
Ppp2r5d	0	0	10	0	0	0	0
Zfp651	5	0	0	0	0	0	0
A530016L24Rik	0	0	0	0	2	0	0
Rabif	0	0	0	0	7	0	0
Eif4g3	0	0	0	0	8	0	0
Reln	0	0	0	0	3	0	0
AL603664.1	2	0	0	0	0	0	0
F830016B08Rik	6	0	0	0	0	0	0
Rnf169	0	0	0	0	1	0	0
Ndst1	15	0	0	0	0	0	0
Aldh1l1	6	0	0	0	0	0	0
Vwa2	3	0	0	0	0	0	0
Il28ra	2	0	0	0	0	0	0
Ttc7	12	0	0	0	7	0	0
Gm10601	3	0	0	0	0	0	0
Pxn	0	0	0	0	1	0	0
Sec31a	5	0	0	0	0	0	0
Gabpa	1	0	0	0	0	0	0
Top2b	0	0	0	0	1	0	0
Fbxw2	0	0	0	0	2	0	0
Wbp11	4	0	0	0	4	0	0
Szt2	0	0	0	0	3	0	0
Atf7ip	3	0	0	0	6	0	0
Atp6v1e1	3	0	0	0	0	0	0
Letmd1	3	0	0	0	0	0	0
Gm8909	0	0	0	0	3	0	0
Triap1	0	0	0	0	13	0	0
Hhatl	2	0	0	0	0	0	0
4632411B12Rik	6	0	0	0	0	0	0
Ier5l	0	0	0	0	2	0	0
Ascc2	0	0	0	0	5	0	0
Coro2a	3	0	0	0	0	0	0
Gm9869	0	0	0	0	2	0	0
Gpr161	2	0	0	0	0	0	0
Abca7	0	0	0	0	2	0	0
Apbb2	0	0	0	0	1	0	0
N4bp2	0	0	0	0	3	0	0
Gm15727	0	0	1	0	0	0	0
Gm16334	0	0	0	0	1	0	0
Spryd4	0	0	0	0	3	0	0
Ebna1bp2	0	0	0	0	4	0	0
Ranbp10	0	0	0	0	2	0	0
Ptgr2	0	0	0	0	9	0	0
Zc3h10	0	0	0	0	1	0	0
Srf	0	0	2	0	0	0	0
Plau	0	0	1	0	0	0	0
Ccdc91	0	0	0	0	1	0	0
Lrrc10	9	0	0	0	0	0	0
Anapc16	1	0	0	0	0	0	0
Entpd5	0	0	0	0	2	0	0
Gm5887	0	0	0	0	2	0	0
Naif1	1	0	1	0	0	0	0
Dynll1	0	0	0	0	16	0	0
Rheb	0	0	0	0	7	0	0
Ap1b1	0	0	0	0	2	0	0
Pmm1	4	0	0	0	0	0	0
Psmb10	0	0	0	0	2	0	0
Noxa1	2	0	0	0	0	0	0
Cdc34	0	0	0	0	4	0	0
Chd5	0	0	0	0	4	0	0
Tgfbi	0	0	5	0	0	0	0
Diras2	5	0	0	0	0	0	0
Gm13192	3	0	0	0	0	0	0
Aspg	0	0	0	0	9	0	0
Gm16236	0	0	0	0	1	0	0
Mier2	0	0	0	0	4	0	0
Dguok	0	0	0	0	2	0	0
Rab3ip	13	0	0	0	0	0	0
Nktr	7	0	0	0	0	0	0
Svep1	0	0	0	0	2	0	0
Ehmt1	3	0	0	0	0	0	0
Gm8223	0	0	0	0	1	0	0
Lrrfip2	8	0	0	0	0	0	0
Tsc1	0	0	0	0	5	0	0
Nutf2	0	0	0	0	2	0	0
Spata24	1	0	0	0	0	0	0
Grin1	14	0	0	0	0	0	0
Zfp36l1	3	0	0	0	0	0	0
Rbm47	0	0	0	0	1	0	0
Irak2	0	0	0	0	1	0	0
Romo1	5	0	0	0	0	0	0
AL808021.1	1	0	0	0	0	0	0
Mt2	1	0	0	0	0	0	0
Zfp474	0	0	0	0	1	0	0
Il22ra1	3	0	0	0	0	0	0
Scyl3	1	0	0	0	0	0	0
Mark2	0	0	0	0	2	0	0
AC159810.1	1	0	0	0	0	0	0
Pds5a	0	0	0	0	5	0	0
Gm12406	2	0	0	0	0	0	0
Itga2b	0	0	0	0	6	0	0
Nkg7	1	0	0	0	0	0	0
Icmt	0	0	0	0	9	0	0
2010001M09Rik	2	0	0	0	0	0	0
Dbt	0	0	0	0	4	0	0
Gm600	0	0	0	0	2	0	0
Rtkn	0	0	0	0	7	0	0
Zwilch	0	0	0	0	7	0	0
Srebf2	6	0	0	0	0	0	0
Pptc7	3	0	0	0	0	0	0
Gm5453	0	0	0	0	8	0	0
Shkbp1	14	0	0	0	10	0	0
Gtf2a2	14	0	0	0	0	0	0
5930422O12Rik	2	0	0	0	0	0	0
Kif26a	0	0	0	0	8	0	0
Gm10782	0	0	3	0	0	0	0
Gas1	0	0	0	0	6	0	0
Dus2l	0	0	0	0	1	0	0
Fam136a	26	0	0	0	0	0	0
Phf20	2	0	0	0	0	0	0
Vav2	4	0	0	0	1	0	0
Rbms1	0	0	0	0	2	0	0
Fam175a	2	0	0	0	0	0	0
Hs6st1	16	0	0	0	0	0	0
Wrn	3	0	0	0	0	0	0
C8g	4	0	0	0	0	0	0
Dpp3	3	0	0	0	0	0	0
Gm17409	2	0	0	0	0	0	0
Icam2	5	0	0	0	0	0	0
Rps6kb2	6	0	0	0	0	0	0
Gm10134	0	0	0	0	3	0	0
Tmem53	0	0	0	0	3	0	0
Hipk4	10	0	0	0	2	0	0
Slc25a48	0	0	3	0	0	0	0
Frs2	18	0	0	0	0	0	0
Timm8b	0	0	0	0	1	0	0
Gm4473	0	0	0	0	1	0	0
Rpusd3	0	0	0	0	1	0	0
Gm12403	3	0	0	0	0	0	0
Hk2	0	0	0	0	6	0	0
Fam192a	1	0	0	0	0	0	0
Cst7	0	0	0	0	1	0	0
Akap8	9	0	0	0	0	0	0
C030046I01Rik	0	0	0	0	3	0	0
Lyz2	12	0	0	0	0	0	0
Tlk1	6	0	0	0	0	0	0
Kif3b	6	0	0	0	0	0	0
Fam126a	0	0	0	0	2	0	0
Tmem173	2	0	0	0	0	0	0
Nol6	1	0	0	0	0	0	0
A430105J06Rik	0	0	0	0	3	0	0
Gcnt2	3	0	0	0	0	0	0
Pax4	1	0	0	0	0	0	0
Gm6309	0	0	1	0	0	0	0
Gm11953	0	0	0	0	2	0	0
Psmg4	1	0	0	0	14	0	0
AL732585.1	1	0	0	0	0	0	0
Gm20459	0	0	0	0	3	0	0
Tiprl	2	0	0	0	0	0	0
Mir5111	1	0	0	0	0	0	0
Rgs19	0	0	0	0	19	0	0
Gm11218	0	0	0	0	1	0	0
Aip	5	0	0	0	0	0	0
Nipal3	1	0	0	0	0	0	0
Cort	0	0	0	0	4	0	0
Mpzl1	2	0	0	0	0	0	0
Gm10399	0	0	1	0	0	0	0
Cyp2d9	2	0	0	0	0	0	0
Gm9897	0	0	0	0	3	0	0
Msi1	0	0	0	0	7	0	0
4930526D03Rik	0	0	0	0	2	0	0
Arl6ip1	1	0	0	0	0	0	0
Atp6v1e2	1	0	0	0	0	0	0
Trim35	0	0	0	0	1	0	0
Pik3r6	0	0	0	0	3	0	0
Rnf182	0	0	0	0	1	0	0
Foxk2	1	0	0	0	0	0	0
Tardbp	0	0	0	0	6	0	0
P4ha2	0	0	0	0	30	0	0
Pla2g12b	2	0	0	0	0	0	0
A930001C03Rik	5	0	0	0	0	0	0
Cldn14	1	0	0	0	0	0	0
Ptplb	0	0	0	0	1	0	0
St6galnac6	1	0	1	0	0	0	0
Tmc7	1	0	0	0	0	0	0
D630029K05Rik	1	0	0	0	0	0	0
Ccdc32	0	0	0	0	1	0	0
Prr5	0	0	0	0	4	0	0
Zfp395	0	0	0	0	1	0	0
BC017643	1	0	0	0	0	0	0
Gm17530	0	0	0	0	2	0	0
Tsc22d3	2	0	0	0	0	0	0
1810046K07Rik	0	2	0	0	0	0	0
Kif18b	0	0	0	0	5	0	0
Txndc8	0	0	0	0	1	0	0
Vcam1	0	0	0	0	3	0	0
2610020H08Rik	0	0	0	0	2	0	0
E2f3	0	0	0	0	9	0	0
Rpsa	0	0	0	0	6	0	0
Tmem206	0	0	0	0	6	0	0
Sept3	4	0	0	0	0	0	0
Irf1	0	0	0	0	21	0	0
Rftn1	6	0	0	0	0	0	0
Sec13	0	0	0	0	3	0	0
Dctn6	2	0	0	0	0	0	0
Slc11a2	2	0	0	0	0	0	0
Usp19	0	0	0	0	1	0	0
Usp20	0	0	0	0	2	0	0
Gm5084	0	0	0	0	1	0	0
Vmn1r	0	0	0	0	1	0	0
Ctcf	0	0	0	0	3	0	0
Wipi1	3	0	0	0	0	0	0
Rapgef3	3	0	0	0	0	0	0
Urgcp	0	0	0	0	7	0	0
Rasl12	11	0	11	0	0	0	0
Gm15732	0	0	0	0	1	0	0
Txn1	0	0	0	0	10	0	0
A330021E22Rik	2	0	0	0	0	0	0
Rictor	0	0	0	0	2	0	0
Sh3glb2	0	0	0	0	1	0	0
Nhlh2	2	0	0	0	0	0	0
Gm1043	0	0	0	0	6	0	0
Espn	0	0	0	0	9	0	0
Tmem159	0	0	0	0	3	0	0
Coq2	7	0	0	0	0	0	0
Pitpnm3	2	0	0	0	0	0	0
Gm16049	4	0	0	0	0	0	0
B3gnt1	1	0	0	0	0	0	0
Gm11790	1	0	0	0	0	0	0
Lyz1	8	0	0	0	0	0	0
6430550D23Rik	3	0	0	0	0	0	0
Cldn4	0	0	0	0	2	0	0
Zcchc6	0	0	0	0	3	0	0
Magi3	0	0	1	0	0	0	0
Rpl26	0	0	0	0	3	0	0
2410019O14Rik	1	0	0	0	0	0	0
Acnat1	0	0	1	0	0	0	0
Itga4	4	0	0	0	0	0	0
D6Mm5e	0	0	0	0	7	0	0
Lamc2	0	0	0	0	3	0	0
Mmp24	3	0	0	0	0	0	0
Tbcc	0	0	12	0	0	0	0
Gm13298	3	0	0	0	0	0	0
Amt	0	0	0	0	1	0	0
Klk14	3	0	0	0	0	0	0
Epm2aip1	8	0	0	0	0	0	0
Hmg20a	0	0	0	0	1	0	0
Rbm18	0	0	0	0	4	0	0
Mia1	10	0	0	0	4	0	0
Prrx2	0	0	0	0	1	0	0
Plbd1	0	0	0	0	2	0	0
Gm11793	1	0	0	0	0	0	0
Etf1	1	0	0	0	0	0	0
Cdc14a	0	0	0	0	3	0	0
Inpp1	0	0	0	0	1	0	0
Gm14286	1	0	0	0	0	0	0
Gm10273	2	0	0	0	0	0	0
BC021614	1	0	0	0	0	0	0
Txndc17	4	0	0	0	2	0	0
Ece1	0	0	0	0	10	0	0
Pglyrp2	1	0	0	0	0	0	0
1110054M08Rik	0	0	0	0	1	0	0
Rab11b	0	0	0	0	2	0	0
Ceacam18	2	0	0	0	0	0	0
Nf2	0	0	0	0	1	0	0
Nsl1	0	0	0	0	3	0	0
Gm13836	0	0	0	0	1	0	0
Tiam1	5	0	0	0	0	0	0
Wibg	0	0	0	0	2	0	0
Gm4596	0	0	0	0	2	0	0
Arih2	0	0	0	0	1	0	0
Dstyk	1	0	0	0	0	0	0
Pcgf1	0	0	0	0	10	0	0
Ctdspl	0	0	0	0	1	0	0
Mettl7b	0	0	0	0	1	0	0
Zfyve19	0	0	0	0	1	0	0
Gm14127	0	0	0	0	1	0	0
Dnahc3	0	0	0	0	1	0	0
Gm8619	0	0	0	0	3	0	0
Ptgds	5	0	0	0	0	0	0
Rrp15	0	0	0	0	9	0	0
4933405E24Rik	0	0	0	0	4	0	0
Rab4b	15	0	0	0	10	0	0
SNORA31	1	0	1	0	0	0	0
Stat2	0	0	0	0	3	0	0
Prx	6	0	0	0	5	0	0
Aup1	0	0	0	0	7	0	0
Cep170	0	0	0	0	0	4	0
Gm7334	4	0	0	0	0	0	0
Gm14240	1	0	0	0	0	0	0
SNORD36	2	0	0	0	0	0	0
Sltm	2	0	0	0	0	0	0
Sctr	0	0	0	0	2	0	0
Zfp664	0	0	3	0	0	0	0
Rad50	0	0	0	0	2	0	0
Entpd2	6	0	0	0	0	0	0
Asb10	0	0	0	0	7	0	0
2410004I01Rik	0	0	0	0	3	0	0
Zfp169	0	0	0	0	5	0	0
Adamts9	0	0	0	0	2	0	0
2310014F06Rik	0	0	0	0	4	0	0
Gstp2	1	0	0	0	0	0	0
E330021D16Rik	0	0	0	0	2	0	0
Trerf1	0	0	2	0	0	0	0
Mirlet7d	0	0	0	0	2	0	0
Gm15421	0	0	0	0	1	0	0
Ppp2cb	8	0	0	0	0	0	0
Ephx3	7	0	0	0	0	0	0
Pard6a	0	0	0	0	3	0	0
Pts	0	0	0	0	1	0	0
Myh7b	2	0	0	0	0	0	0
Ephx2	0	0	0	0	9	0	0
Trak1	9	0	0	0	0	0	0
Rad51	0	0	0	0	1	0	0
Nsun2	1	0	0	0	0	0	0
Ifngr1	2	0	0	0	0	0	0
Gm16767	1	0	0	0	0	0	0
A930005H10Rik	0	0	0	0	1	0	0
Eif5	0	0	0	0	2	0	0
Camk1	0	0	0	0	1	0	0
Myl6b	0	0	0	0	3	0	0
Sgms1	0	0	0	0	5	0	0
Cnn2	0	0	0	0	2	0	0
Gm6990	5	0	0	0	0	0	0
Elmo3	0	0	0	0	2	0	0
Fam71a	0	0	0	0	1	0	0
9530046B11Rik	0	0	2	0	0	0	0
Mthfd2	0	0	0	0	3	0	0
Ppfibp1	0	0	0	0	4	0	0
Myog	0	0	0	0	2	0	0
Uaca	0	0	0	0	3	0	0
Qars	0	0	0	0	1	0	0
SNORA4	0	0	0	0	1	0	0
Gm15351	1	0	0	0	0	0	0
Pigu	1	0	0	0	0	0	0
Tet2	0	0	0	0	10	0	0
Gm15601	4	0	0	0	0	0	0
Gm11730	2	0	0	0	0	0	0
Slc2a5	0	0	0	0	2	0	0
Fbxl8	0	0	0	0	2	0	0
Gm9877	0	0	0	0	1	0	0
Fbxl16	1	0	0	0	0	0	0
Znf512b	0	0	0	0	7	0	0
Tpx2	3	0	0	0	0	0	0
Serpinb6c	1	0	0	0	2	0	0
Gm16257	1	0	0	0	0	0	0
Ccdc142	0	0	0	0	9	0	0
Ccdc37	1	0	0	0	0	0	0
Gm4841	6	0	0	0	0	0	0
Gm11945	0	0	0	0	10	0	0
Plcb2	0	0	0	0	3	0	0
Spns2	2	0	0	0	2	0	0
Pold2	0	0	0	0	7	0	0
Cnpy1	0	0	0	0	1	0	0
Gal3st1	0	0	0	0	3	0	0
Cpsf3	4	0	0	0	0	0	0
AC122463.1	2	0	2	0	0	0	0
Ncf2	0	0	0	0	1	0	0
Ntn1	0	0	0	0	1	0	0
Plcb3	0	0	0	0	2	0	0
Tug1	0	0	0	0	1	0	0
Gadd45g	3	0	0	0	0	0	0
Mir122a	1	0	0	0	0	0	0
Prss35	0	0	0	0	1	0	0
Mdk	0	0	0	0	4	0	0
Tceb3	3	0	0	0	0	0	0
Gcn1l1	0	0	0	0	4	0	0
Gm15552	0	0	0	0	2	0	0
Ank1	0	0	0	0	13	0	0
1700066J24Rik	3	0	0	0	0	0	0
Mtor	0	0	0	0	1	0	0
Cpa4	0	0	0	0	2	0	0
Ltf	3	0	0	0	0	0	0
Orc5	0	0	0	0	2	0	0
Aldob	0	0	1	0	0	0	0
Optc	0	0	0	0	3	0	0
Trim24	12	0	0	0	0	0	0
Dcaf6	2	0	0	0	0	0	0
1700007K13Rik	0	0	0	0	5	0	0
Med6	0	0	0	0	1	0	0
Igdcc4	17	0	17	0	0	0	0
B4galt2	0	0	0	0	1	0	0
Mob1b	0	0	0	0	1	0	0
Nhlrc2	9	0	0	0	0	0	0
Zbtb48	0	0	0	0	7	0	0
Gm15516	2	0	0	0	0	0	0
Lemd3	0	0	0	0	2	0	0
Gm88	0	0	0	0	3	0	0
Ptprg	0	0	0	0	2	0	0
Tspyl3	5	0	0	0	0	0	0
Tmem66	1	0	0	0	0	0	0
Dffa	0	0	0	0	8	0	0
Ube2g1	1	0	0	0	1	0	0
Gm13421	3	0	0	0	0	0	0
Tcte2	14	0	0	0	0	0	0
Gm11784	0	0	0	0	1	0	0
Msrb3	0	0	0	0	5	0	0
Mea1	0	0	7	0	0	0	0
Mab21l3	1	0	0	0	0	0	0
Ddhd1	3	0	0	0	0	0	0
Ambp	1	0	0	0	0	0	0
Cnr2	3	0	0	0	0	0	0
Rpl7a	6	0	0	0	1	0	0
Rnf111	1	0	0	0	0	0	0
Pdrg1	4	0	0	0	0	0	0
Ndufv1	5	0	0	0	0	0	0
Steap2	2	0	0	0	0	0	0
Nmt1	0	0	0	0	9	0	0
Slc41a3	16	0	0	0	0	0	0
Dclre1a	9	0	0	0	0	0	0
Wbscr22	0	0	0	0	1	0	0
Lamc1	0	0	0	0	3	0	0
4833427G06Rik	0	2	0	0	1	0	0
Ptcra	0	0	8	0	0	0	0
Gss	3	0	0	0	0	0	0
Sema4f	0	0	0	0	3	0	0
Rps6kc1	0	0	0	0	1	0	0
Cd2	1	0	0	0	0	0	0
Polr3k	0	0	0	0	46	0	0
Cartpt	0	0	0	0	3	0	0
Edem2	5	0	0	0	0	0	0
Layn	0	0	0	0	1	0	0
Gnl1	0	0	0	0	4	0	0
Mgat5b	1	0	0	0	0	0	0
Dcaf17	6	0	0	0	0	0	0
Cyp2t4	15	0	0	0	5	0	0
Uck1	1	0	1	0	0	0	0
Gm12526	0	0	0	0	2	0	0
A630007B06Rik	4	0	0	0	0	0	0
Pcbp1	34	0	0	0	0	0	0
Uts2r	1	0	0	0	0	0	0
Gm11958	0	0	0	0	2	0	0
Higd1b	0	0	0	0	15	0	0
Akap8l	10	0	0	0	0	0	0
Tuba8	1	0	0	0	0	0	0
Gm10382	0	0	2	0	0	0	0
4931440P22Rik	1	0	0	0	0	0	0
Nagk	0	0	0	0	2	0	0
Gm10320	0	0	0	0	2	0	0
Mir3064	1	0	0	0	0	0	0
Zfp60	1	0	0	0	0	0	0
Dennd4a	4	0	4	0	0	0	0
Tgfbr2	0	0	0	0	5	0	0
Slc22a21	0	0	0	0	29	0	0
Gm17157	2	0	0	0	0	0	0
0610012D04Rik	3	0	0	0	0	0	0
Syt12	10	0	0	0	0	0	0
Ptges2	1	0	1	0	0	0	0
Mccc2	0	0	0	0	16	0	0
Dbnl	0	0	0	0	6	0	0
Dcun1d3	0	0	0	0	3	0	0
Polr3h	1	0	0	0	0	0	0
Rap1gap	0	0	0	0	14	0	0
Nudcd3	0	0	0	0	6	0	0
Gm13444	0	0	0	0	2	0	0
Hrasls5	0	0	0	0	2	0	0
Trim14	1	0	0	0	0	0	0
Slc39a9	1	0	0	0	0	0	0
Siglece	3	0	0	0	0	0	0
Lamb2	0	0	0	0	1	0	0
Acd	0	0	0	0	3	0	0
Aspn	0	0	0	0	1	0	0
Commd7	1	0	0	0	0	0	0
Nos3	0	0	0	0	12	0	0
Mcf2l	1	0	0	0	0	0	0
Smad5	0	0	2	0	0	0	0
Tab2	3	0	0	0	0	0	0
Slc23a1	1	0	0	0	0	0	0
Psma3	0	0	0	0	4	0	0
Mical3	3	0	0	0	0	0	0
Agtr1a	0	0	0	0	3	0	0
Cd74	11	0	0	0	0	0	0
Fadd	0	0	0	0	0	0	13
4921530D09Rik	1	0	0	0	0	0	0
Mrpl28	1	0	0	0	0	0	0
Casz1	0	0	0	0	6	0	0
Tpd52l2	0	0	0	0	1	0	0
Pes1	0	0	0	0	4	0	0
Sppl3	0	0	0	0	11	0	0
Upk1b	0	0	0	0	1	0	0
Tmed4	0	0	0	0	1	0	0
Myoz3	2	0	0	0	0	0	0
Gm16510	2	0	0	0	0	0	0
Gm6034	0	0	0	0	2	0	0
Ptplad1	19	0	19	0	0	0	0
Zfyve21	0	0	0	0	7	0	0
1110031I02Rik	1	0	0	0	0	0	0
Kdm5b	0	0	0	0	5	0	0
Mocs2	0	0	0	0	1	0	0
Sox8	1	0	0	0	0	0	0
Phf2	0	0	0	0	13	0	0
Erh	1	0	0	0	0	0	0
Gm15570	12	0	0	0	6	0	0
Dpp8	19	0	19	0	0	0	0
2310030G06Rik	0	0	0	0	1	0	0
BC029722	5	0	0	0	0	0	0
Insig1	0	0	0	0	5	0	0
Tatdn2	0	0	0	0	3	0	0
Stub1	1	0	0	0	0	0	0
Map2k1	0	0	0	0	3	0	0
Smg1	1	0	0	0	0	0	0
Ptn	0	0	0	0	0	0	2
Klhdc3	0	0	5	0	0	0	0
Mir3060	0	0	0	0	2	0	0
Brp44	2	0	0	0	0	0	0
Chrna2	0	0	0	0	3	0	0
Pbld1	1	0	0	0	0	0	0
Ndufaf3	0	0	0	0	1	0	0
Htra4	0	0	0	0	0	1	0
Acsl6	0	0	0	0	15	0	0
Fam195a	1	0	0	0	0	0	0
Gm15739	0	0	2	0	0	0	0
Wbscr27	0	0	0	0	1	0	0
Slc6a1	0	0	0	0	1	0	0
Rplp0	0	0	0	0	16	0	0
Gm17276	3	0	0	0	0	0	0
Micu1	3	0	0	0	0	0	0
Gm11637	0	0	0	0	8	0	0
Plac8	6	0	0	0	0	0	0
Fhod1	0	0	0	0	2	0	0
Sardh	4	0	0	0	0	0	0
Phf13	0	0	0	0	6	0	0
Rab40c	1	0	0	0	0	0	0
Dnajc5	0	0	0	0	2	0	0
Lrrc4	2	0	0	0	0	0	0
Steap1	2	0	0	0	0	0	0
Adrbk1	5	0	0	0	0	0	0
Mlec	0	0	0	0	16	0	0
Usp38	0	0	0	0	14	0	0
Rnf208	14	0	0	0	0	0	0
Tubb4b	17	0	0	0	0	0	0
Anxa7	0	0	1	0	0	0	0
Cd33	2	0	0	0	0	0	0
2810430I11Rik	2	0	0	0	0	0	0
Gm5466	0	0	0	0	32	0	0
Gatc	0	0	0	0	15	0	0
Slc25a18	1	0	0	0	0	0	0
Gypa	0	0	0	0	3	0	0
Kcnk1	0	0	0	0	2	0	0
Creb3l2	18	0	0	0	0	0	0
Ywhaz	2	0	0	0	0	0	0
Map3k7	1	0	0	0	0	0	0
Tubgcp3	3	0	0	0	0	0	0
Mtfmt	11	0	11	0	0	0	0
Gm13193	2	0	0	0	0	0	0
Ubap1	5	0	0	0	0	0	0
Tnfaip2	0	0	0	0	2	0	0
Slc2a6	3	0	0	0	1	0	0
4930479D17Rik	0	0	0	0	1	0	0
Bub1b	0	0	0	0	3	0	0
Stx1a	0	0	0	0	1	0	0
Lrrc26	10	0	0	0	0	0	0
Grin3b	0	0	0	0	3	0	0
4933426M11Rik	1	0	0	0	0	0	0
Rnf126	0	0	0	0	5	0	0
Galt	8	0	0	0	0	0	0
Amfr	2	0	0	0	0	0	0
Atf1	4	0	0	0	0	0	0
Hdac7	3	0	0	0	0	0	0
Btbd19	0	0	0	0	4	0	0
U2	1	0	0	0	1	0	0
Nmu	0	0	0	0	1	0	0
Myh10	0	0	0	0	1	0	0
Fgf15	0	0	0	0	0	0	4
Gm15530	0	0	0	0	1	0	0
Srsf10	2	0	0	0	0	0	0
Lrrc29	0	0	0	0	2	0	0
Nup107	2	0	0	0	0	0	0
Csf1r	2	0	0	0	0	0	0
Gm17134	0	0	0	0	2	0	0
Cnpy3	0	0	9	0	0	0	0
Gm12219	0	0	0	0	24	0	0
Gm13445	0	0	0	0	13	0	0
Upp2	2	0	0	0	0	0	0
Tob2	2	0	0	0	0	0	0
Tsnaxip1	0	0	0	0	1	0	0
Alg13	0	0	0	0	1	0	0
Ldoc1l	0	0	0	0	2	0	0
Srd5a3	0	0	0	0	2	0	0
0610010F05Rik	1	0	0	0	0	0	0
2310015B20Rik	0	0	0	0	3	0	0
Gm4891	0	0	0	0	2	0	0
Angel2	0	0	0	0	1	0	0
Olfm1	0	0	0	0	2	0	0
Ppp1r1c	1	0	0	0	0	0	0
Agpat9	1	0	0	0	0	0	0
Rfc5	0	0	3	0	0	0	0
B3gnt9	0	0	0	0	1	0	0
Mfsd11	1	0	0	0	0	0	0
Klhl12	0	0	0	0	7	0	0
Tmem209	0	0	0	0	11	0	0
Gm15967	0	0	0	0	2	0	0
Anks6	3	0	0	0	0	0	0
Ube2d2	2	0	0	0	0	0	0
Lrig1	2	0	0	0	0	0	0
BC023105	1	0	0	0	0	0	0
Gls	0	0	0	0	1	0	0
Car5a	0	0	0	0	1	0	0
Macrod1	0	0	0	0	2	0	0
Gm15816	0	0	0	0	9	0	0
Prpf6	0	0	0	0	16	0	0
Pbk	0	0	0	0	18	0	0
Rbm12	5	0	0	0	0	0	0
Klk1b9	1	0	0	0	0	0	0
Rpl7l1	0	0	12	0	0	0	0
Nop58	0	0	1	0	0	0	0
Acnat2	0	0	1	0	0	0	0
Nat6	0	0	0	0	1	0	0
Gm13091	0	0	0	0	5	0	0
Crem	0	0	0	0	1	0	0
Adck4	1	0	0	0	5	0	0
Foxs1	1	0	0	0	0	0	0
Klk13	2	0	0	0	0	0	0
1700030C12Rik	1	0	0	0	0	0	0
Gm5499	4	0	0	0	0	0	0
Yipf3	0	0	0	0	2	0	0
Socs5	8	0	0	0	0	0	0
Rpp21	0	0	0	0	6	0	0
Atg9b	0	0	0	0	10	0	0
Wfikkn1	1	0	0	0	0	0	0
1110032A03Rik	0	0	0	0	1	0	0
Gm10130	0	0	0	0	1	0	0
Oraov1	0	0	0	0	0	0	8
Cntfr	8	0	0	0	0	0	0
Gm13558	2	0	0	0	0	0	0
Gm16534	1	0	1	0	0	0	0
Mdga2	0	0	0	0	3	0	0
Ormdl2	0	0	0	0	1	0	0
Gm13092	0	0	0	0	8	0	0
Cnksr3	0	0	0	0	7	0	0
Plcd1	0	0	0	0	2	0	0
Notch3	9	0	0	0	0	0	0
Tmem81	3	0	0	0	0	0	0
Bmpr2	0	0	1	0	0	0	0
Il31ra	0	0	0	0	3	0	0
2600006L11Rik	0	0	0	0	2	0	0
Fam109a	2	0	0	0	0	0	0
Cntn2	2	0	0	0	0	0	0
Kdm2a	17	0	0	0	0	0	0
Iah1	4	0	0	0	0	0	0
Rltpr	0	0	0	0	2	0	0
Rpl36a	3	0	0	0	4	0	0
Gm17212	2	0	0	0	0	0	0
Gm8385	0	0	0	0	2	0	0
1700034E13Rik	0	0	0	0	1	0	0
Gm15082	0	0	0	0	1	0	0
Cerkl	3	0	0	0	0	0	0
Polm	0	0	0	0	6	0	0
Gm11670	0	0	0	0	1	0	0
Pcyox1	32	0	0	0	0	0	0
Rbm22	17	0	0	0	0	0	0
Mterf	0	0	0	0	1	0	0
Dbr1	0	0	0	0	1	0	0
Adcy5	0	0	0	0	1	0	0
Sec22c	8	0	0	0	0	0	0
Gm10499	0	0	0	0	2	0	0
Gm9761	0	0	0	0	2	0	0
Clic3	3	0	0	0	0	0	0
Atp5j	1	0	0	0	0	0	0
Gm17549	2	0	0	0	0	0	0
Entpd8	2	0	0	0	0	0	0
Sytl3	0	0	0	0	4	0	0
Gm12222	0	0	0	0	14	0	0
Rnf215	0	0	0	0	7	0	0
AA543186	2	0	0	0	0	0	0
Cyp4f16	1	0	0	0	0	0	0
Park7	0	0	0	0	3	0	0
Senp1	1	0	0	0	0	0	0
Crip3	0	0	1	0	0	0	0
C1ql1	0	0	0	0	6	0	0
Gm14125	0	0	0	0	1	0	0
Eif6	5	0	0	0	0	0	0
Aig1	6	0	0	0	0	0	0
Gm12712	0	0	0	0	1	0	0
Gm13433	2	0	0	0	0	0	0
Fgf3	0	0	0	0	0	0	3
Srsf9	0	0	0	0	14	0	0
Evi2a	3	0	2	0	0	0	0
Arid3c	4	0	0	0	0	0	0
Gm16198	0	0	0	0	1	0	0
Cpne1	5	0	0	0	0	0	0
Rps3	0	0	0	0	1	0	0
G6pc2	0	0	1	0	0	0	0
1500032L24Rik	7	0	0	0	0	0	0
Aamp	0	0	0	0	0	0	13
Gm20391	0	0	0	0	1	0	0
2310016M24Rik	2	0	0	0	0	0	0
Mrpl41	8	0	0	0	0	0	0
Baz1b	0	0	0	0	1	0	0
Gm15624	0	0	0	0	1	0	0
Camta1	0	0	0	0	3	0	0
Pcbd2	0	0	2	0	0	0	0
Uba7	0	0	0	0	1	0	0
Tspan3	0	0	0	0	1	0	0
Mei1	1	0	0	0	0	0	0
C87436	26	0	0	0	0	0	0
Olig3	1	0	0	0	0	0	0
2210016L21Rik	0	0	0	0	7	0	0
Snrnp27	32	0	0	0	0	0	0
SCARNA11	0	0	0	0	1	0	0
Ctnnbl1	4	0	0	0	0	0	0
Mettl7a2	1	0	0	0	0	0	0
Cxxc1	0	0	0	0	0	1	0
Gm13633	2	0	0	0	0	0	0
Ppapdc3	1	0	1	0	0	0	0
Xkr7	4	0	0	0	0	0	0
Ikbip	1	0	0	0	0	0	0
Serpina3n	0	0	1	0	0	0	0
Slc6a13	1	0	0	0	0	0	0
Pex26	3	0	0	0	0	0	0
Gm17519	1	0	0	0	0	0	0
Slc2a4rg	0	0	0	0	1	0	0
Ndufa6	7	0	0	0	0	0	0
Camk2b	0	0	0	0	2	0	0
Fubp1	0	0	0	0	5	0	0
Rbm14	11	0	0	0	0	0	0
Gm13015	0	0	0	0	2	0	0
Armcx1	2	0	0	0	0	0	0
Atp5d	0	0	0	0	4	0	0
Gm18889	1	0	0	0	0	0	0
Stip1	0	0	0	0	2	0	0
Gm15605	0	0	0	0	3	0	0
Slc48a1	4	0	0	0	0	0	0
Gm12843	0	0	0	0	1	0	0
5	1	0	0	0	0	0	0
Mid2	2	0	0	0	0	0	0
Casp7	7	0	0	0	0	0	0
A930015D03Rik	0	0	0	0	1	0	0
Tcea3	2	0	0	0	0	0	0
Gm13370	2	0	0	0	0	0	0
Eng	1	0	1	0	0	0	0
Rufy4	0	0	0	0	0	0	13
Klk8	1	0	0	0	0	0	0
Rpusd2	0	0	0	0	3	0	0
Fau	0	0	0	0	21	0	0
Nqo2	1	0	0	0	13	0	0
Brd4	11	0	0	0	0	0	0
Gm17084	1	0	0	0	13	0	0
Gm13307	3	0	0	0	0	0	0
Nhp2l1	3	0	0	0	0	0	0
Myom3	3	0	0	0	0	0	0
Sst	0	0	0	0	1	0	0
Cck	7	0	0	0	0	0	0
AL807823.1	2	0	0	0	0	0	0
Adam2	0	0	0	0	2	0	0
1110003E01Rik	0	0	0	0	7	0	0
Ankrd39	2	0	0	0	0	0	0
Gm12217	0	0	0	0	4	0	0
Spcs2	0	0	0	0	1	0	0
Lrrn2	2	0	0	0	0	0	0
Gm6654	0	0	0	0	3	0	0
Tcirg1	2	0	0	0	0	0	0
Atf2	0	0	0	0	1	0	0
Fam114a1	0	0	0	0	1	0	0
Gtf2e2	8	0	0	0	0	0	0
Sertad1	10	0	0	0	5	0	0
Arl2bp	1	0	0	0	0	0	0
Sept9	2	0	0	0	0	0	0
2810422O20Rik	1	0	0	0	0	0	0
Id3	2	0	0	0	0	0	0
Coq6	0	0	0	0	7	0	0
Pskh1	0	0	0	0	1	0	0
Rpusd1	1	0	0	0	0	0	0
2310015A10Rik	2	0	0	0	0	0	0
Dok1	0	0	0	0	9	0	0
F5	1	0	0	0	0	0	0
Rab14	0	0	0	0	15	0	0
Gm15995	0	0	0	0	1	0	0
Ctu1	4	0	0	0	0	0	0
2310021P13Rik	0	0	1	0	0	0	0
Rbms2	0	0	0	0	3	0	0
2210015D19Rik	0	0	0	0	5	0	0
Id1	2	0	0	0	0	0	0
Bach2	2	0	0	0	0	0	0
Wdr65	0	0	0	0	1	0	0
Gm13004	0	0	0	0	9	0	0
Tnfaip3	11	0	0	0	0	0	0
Minpp1	0	0	0	0	7	0	0
Limk2	0	0	0	0	14	0	0
Tubb2b	1	0	0	0	14	0	0
Hvcn1	3	0	0	0	0	0	0
Apof	0	0	0	0	3	0	0
Man1b1	13	0	0	0	0	0	0
Iqsec1	13	0	0	0	0	0	0
Atf3	0	0	0	0	4	0	0
Gm16052	5	0	0	0	0	0	0
Adam9	0	0	0	0	0	1	0
Rsph9	0	0	0	0	3	0	0
Itpr2	0	0	0	0	1	0	0
Dicer1	0	0	5	0	0	0	0
Batf3	0	0	0	0	3	0	0
Vmn1r2	0	0	0	0	1	0	0
Gm13828	0	0	0	0	4	0	0
Gm11946	0	0	0	0	1	0	0
SNORA70	2	0	0	0	2	0	0
Usp47	0	0	0	0	11	0	0
Dbi	0	0	0	0	2	0	0
Eri2	0	0	0	0	1	0	0
Otub1	0	0	0	0	2	0	0
Tatdn3	0	0	0	0	2	0	0
Gm17572	5	0	0	0	0	0	0
Cldn13	0	0	0	0	1	0	0
Obfc2b	0	0	0	0	3	0	0
Nlrc5	1	0	0	0	0	0	0
Entpd6	0	0	0	0	1	0	0
Ino80b	0	0	0	0	8	0	0
Gulo	0	0	0	0	4	0	0
Dhx32	0	0	3	0	0	0	0
Fam102a	1	0	1	0	0	0	0
Pcnxl2	0	0	0	0	3	0	0
2700081O15Rik	0	0	0	0	2	0	0
Smurf2	6	0	0	0	0	0	0
Kif2c	0	0	0	0	5	0	0
Polh	0	0	0	0	2	0	0
Tpt1	1	0	0	0	2	0	0
Smarcd1	1	0	0	0	0	0	0
Epb4.1l1	1	0	0	0	0	0	0
SNORA61	0	0	0	0	5	0	0
Ankrd13d	14	0	0	0	0	0	0
Gm5805	2	0	0	0	0	0	0
Fzd2	0	0	0	0	14	0	0
Dnajc4	0	0	0	0	2	0	0
Pdcd7	14	0	14	0	0	0	0
Ptgfrn	3	0	0	0	0	0	0
Gm7075	1	0	0	0	0	0	0
Gm13049	0	0	0	0	1	0	0
Accn2	1	0	0	0	0	0	0
Samm50	0	0	0	0	2	0	0
Sik2	0	2	0	0	1	0	0
Pdcl2	0	0	0	0	3	0	0
Xrcc6	4	0	0	0	0	0	0
Gm15890	1	0	0	0	0	0	0
Gm13094	0	0	0	0	4	0	0
Actr10	0	0	0	0	5	0	0
Zdhhc1	0	0	0	0	3	0	0
Sec24b	2	0	0	0	0	0	0
Gm11970	0	0	0	0	1	0	0
Nol3	0	0	0	0	3	0	0
Gm17227	0	0	0	0	2	0	0
Ccdc134	7	0	0	0	0	0	0
Ptges3	0	0	0	0	3	0	0
Gm13072	0	0	0	0	1	0	0
BC032203	0	0	5	0	0	0	0
Rhod	15	0	0	0	0	0	0
Klf14	0	0	0	0	3	0	0
Gm14256	1	0	0	0	0	0	0
Papd7	1	0	0	0	0	0	0
Fstl3	0	0	0	0	5	0	0
Gm11948	0	0	0	0	10	0	0
Fgf22	0	0	0	0	3	0	0
Sod1	4	0	0	0	0	0	0
Accn3	0	0	0	0	12	0	0
Polb	0	0	0	0	4	0	0
Abca8b	3	0	0	0	0	0	0
Usp48	0	0	0	0	17	0	0
Gck	0	0	0	0	3	0	0
Sell	1	0	0	0	0	0	0
Ppp1r13b	0	0	0	0	2	0	0
Mest	0	0	0	0	11	0	0
Slc4a4	0	0	0	0	1	0	0
Rybp	0	0	0	0	2	0	0
Gm11966	0	0	0	0	2	0	0
Bid	3	0	0	0	0	0	0
Rpl22	0	0	0	0	9	0	0
Gm16624	0	0	0	0	2	0	0
Hspg2	0	0	0	0	15	0	0
Pla2g1b	0	0	0	0	3	0	0
Gm6728	0	0	0	0	3	0	0
Ero1l	4	0	0	0	0	0	0
Gm8731	8	0	0	0	0	0	0
Wif1	0	0	0	0	4	0	0
Sf3a1	0	0	0	0	9	0	0
Cyp2d11	2	0	0	0	0	0	0
U4	0	0	0	0	4	0	0
Igsf11	0	0	0	0	3	0	0
Sik1	10	0	0	0	0	0	0
Pa2g4	0	0	0	0	3	0	0
Thumpd1	0	0	0	0	2	0	0
Nudt2	6	0	0	0	0	0	0
Evc	0	0	0	0	1	0	0
AC140381.1	0	0	0	0	1	0	0
Cep250	5	0	0	0	0	0	0
Itpripl2	1	0	0	0	0	0	0
Selm	0	0	0	0	8	0	0
Mybbp1a	4	0	0	0	2	0	0
Dopey1	0	0	0	0	2	0	0
Arrdc1	1	0	0	0	0	0	0
Rfc1	0	0	0	0	7	0	0
Mrps35	0	0	0	0	4	0	0
C9	0	0	0	0	1	0	0
Ptx3	4	0	0	0	0	0	0
Gnao1	2	0	0	0	0	0	0
Arntl2	0	0	0	0	3	0	0
1700029P11Rik	2	0	0	0	0	0	0
Ube4b	0	0	0	0	2	0	0
Gm11951	0	0	0	0	1	0	0
Fuca1	2	0	0	0	0	0	0
Naip2	0	0	0	0	1	0	0
Smarca5	0	0	0	0	20	0	0
Rbm25	0	0	0	0	5	0	0
Acsm3	0	0	0	0	3	0	0
Pabpc1	5	0	0	0	0	0	0
Chaf1b	2	0	0	0	0	0	0
2310028H24Rik	7	0	0	0	0	0	0
Gm17591	1	0	0	0	0	0	0
RP23	1	0	0	0	0	0	0
Atp6v0d1	0	0	0	0	3	0	0
Myl7	0	0	0	0	4	0	0
Uap1l1	12	0	0	0	0	0	0
Slc22a4	0	0	0	0	23	0	0
B4galt4	0	0	0	0	2	0	0
Serf1	0	0	0	0	9	0	0
Gm14469	1	0	0	0	0	0	0
Gm15083	0	0	0	0	1	0	0
Tppp3	0	0	0	0	3	0	0
Edf1	7	0	0	0	0	0	0
BC005764	0	0	0	0	5	0	0
Wiz	4	0	0	0	0	0	0
Tpsg1	1	0	0	0	0	0	0
Dnalc1	0	0	0	0	7	0	0
Stk11	0	0	0	0	1	0	0
Atp11a	3	0	0	0	0	0	0
Gm973	0	0	1	0	0	0	0
Cx3cl1	1	0	0	0	0	0	0
Dclk3	1	0	0	0	0	0	0
Plekhg4	0	0	0	0	3	0	0
Dis3l	0	0	0	0	1	0	0
Mirlet7a	0	0	0	0	1	0	0
Spc25	0	0	1	0	0	0	0
Gm16098	1	0	0	0	0	0	0
Gpx1	0	0	0	0	1	0	0
Optn	5	0	0	0	0	0	0
Tiparp	9	0	0	0	0	0	0
Gm15541	2	0	0	0	0	0	0
Acads	0	0	0	0	15	0	0
Cdhr4	0	0	0	0	1	0	0
Gm13010	0	0	0	0	2	0	0
Jakmip1	0	0	0	0	17	0	0
Gm13002	0	0	0	0	2	0	0
Abcc10	0	0	1	0	2	0	0
Dtl	0	0	0	0	2	0	0
Gtpbp2	0	0	0	0	3	0	0
AC127694.1	0	0	0	0	1	0	0
Tubb2a	0	0	0	0	12	0	0
Fdxacb1	0	0	0	0	1	0	0
Fcho2	0	0	0	0	7	0	0
Arfrp1	0	0	0	0	1	0	0
Wfs1	0	0	0	0	10	0	0
4933405L10Rik	0	0	0	0	2	0	0
Msh2	2	0	0	0	18	0	0
Gm13831	0	0	0	0	9	0	0
B230219D22Rik	0	0	3	0	0	0	0
Gm11628	0	0	0	0	2	0	0
Prkag2	0	0	0	0	1	0	0
Galntl4	0	0	0	0	4	0	0
Ahsa2	2	0	0	0	0	0	0
Gm8199	0	0	0	0	1	0	0
Impdh2	0	0	0	0	1	0	0
Smad3	0	0	0	0	9	0	0
Atp5g3	0	0	0	0	1	0	0
4933433C11Rik	6	0	0	0	0	0	0
Nostrin	0	0	1	0	0	0	0
E130303B06Rik	0	0	0	0	3	0	0
Gm20479	7	0	0	0	4	0	0
Mir3960	1	0	1	0	0	0	0
Rhoq	1	0	0	0	0	0	0
Oprl1	0	0	0	0	4	0	0
Wnt4	0	0	0	0	7	0	0
Spag4	4	0	0	0	0	0	0
U1	2	0	0	0	0	0	0
Gm757	10	0	0	0	0	0	0
Gm14472	3	0	0	0	0	0	0
Gm12792	1	0	0	0	0	0	0
Tagap1	0	0	0	0	6	0	0
Gm10425	0	0	0	0	1	0	0
Pelo	0	0	0	0	1	0	0
Gm12457	0	0	0	0	1	0	0
Lgals9	1	0	1	0	0	0	0
0610011F06Rik	1	0	0	0	0	0	0
Ano1	0	0	0	0	0	0	11
Cyp2a12	1	0	0	0	1	0	0
Shc2	0	0	0	0	4	0	0
Rcan3	1	0	0	0	0	0	0
Flrt1	0	0	0	0	2	0	0
Snx31	1	0	0	0	0	0	0
Nup188	0	0	0	0	1	0	0
Hes2	0	0	0	0	6	0	0
Nos2	1	0	0	0	0	0	0
Pdlim4	0	0	0	0	30	0	0
Gm11127	0	0	0	0	2	0	0
Polrmt	0	0	0	0	5	0	0
Isca1	0	0	0	0	6	0	0
Pofut1	6	0	0	0	0	0	0
H2	0	0	0	0	6	0	0
Tnpo1	0	0	0	0	6	0	0
Smg7	0	0	0	0	3	0	0
BC055324	1	0	0	0	0	0	0
Tas1r1	0	0	0	0	3	0	0
Ppp1r18	0	0	0	0	1	0	0
Pex13	1	0	0	0	0	0	0
Tnfrsf13c	5	0	0	0	0	0	0
Lif	0	0	0	0	10	0	0
Gm15066	0	0	0	0	1	0	0
Qrich1	0	0	0	0	1	0	0
Rexo4	1	0	0	0	0	0	0
Leprotl1	1	0	0	0	0	0	0
Atp6v0a2	0	0	2	0	0	0	0
1110017D15Rik	5	0	0	0	0	0	0
Tekt1	2	0	0	0	0	0	0
Phgr1	0	0	0	0	2	0	0
Hexim2	0	0	0	0	5	0	0
P4ha1	7	0	0	0	0	0	0
Ppp1cc	3	0	0	0	0	0	0
Fkbp2	0	0	0	0	2	0	0
Mgp	2	0	0	0	1	0	0
Gm16588	1	0	0	0	0	0	0
Antxr1	1	0	0	0	0	0	0
U6atac	3	0	0	0	0	0	0
Alpl	0	0	0	0	7	0	0
Agpat6	0	0	0	0	20	0	0
Gm5227	0	0	0	0	1	0	0
Gm13387	3	0	0	0	0	0	0
Nelf	5	0	0	0	0	0	0
2010002N04Rik	10	0	0	0	0	0	0
Exosc10	0	0	0	0	1	0	0
Uqcc	5	0	0	0	0	0	0
Pold4	16	0	0	0	0	0	0
Gng11	0	0	0	0	1	0	0
4931406B18Rik	1	0	0	0	0	0	0
Mettl7a3	3	0	0	0	0	0	0
Cfd	0	0	0	0	1	0	0
Acss1	0	0	0	0	1	0	0
Rnf185	0	0	0	0	15	0	0
Ltbp4	13	0	0	0	10	0	0
Slc29a4	6	0	0	0	0	0	0
Orm1	1	0	0	0	0	0	0
Naa35	0	0	0	0	2	0	0
Lias	0	0	0	0	7	0	0
Fam65a	0	0	0	0	2	0	0
Lbx2	0	0	0	0	9	0	0
Pla2g16	0	0	0	0	2	0	0
Mcfd2	12	0	0	0	10	0	0
1700051A21Rik	1	0	0	0	0	0	0
Lmf1	1	0	0	0	0	0	0
SNORD18	0	0	0	0	1	0	0
Gar1	2	0	0	0	0	0	0
Ska1	0	0	0	0	0	1	0
Plat	0	0	0	0	6	0	0
Dnajc11	0	0	0	0	6	0	0
Fbxo39	3	0	0	0	0	0	0
Mt1	1	0	0	0	0	0	0
1700045H11Rik	0	0	0	0	1	0	0
Fam161a	2	0	0	0	0	0	0
AI838599	0	0	0	0	3	0	0
Aldh6a1	0	0	0	0	3	0	0
Cep110	0	0	0	0	5	0	0
Tbc1d10a	0	0	0	0	12	0	0
Gm15487	5	0	0	0	0	0	0
Mir328	0	0	0	0	1	0	0
Actn1	3	0	0	0	0	0	0
Sh2d3c	1	0	1	0	0	0	0
Ndel1	0	0	0	0	2	0	0
Gab1	0	0	0	0	23	0	0
Gm10221	0	0	0	0	4	0	0
Slc35e4	0	0	0	0	5	0	0
Gm11962	0	0	0	0	2	0	0
Fam163b	0	0	0	0	1	0	0
Gm7666	0	0	0	0	2	0	0
Grin2b	0	0	0	0	1	0	0
Fam20a	2	0	0	0	0	0	0
Crmp1	0	0	0	0	8	0	0
Ipcef1	0	0	0	0	11	0	0
Pcnx	0	0	0	0	1	0	0
Abca2	11	0	0	0	0	0	0
Rbm39	3	0	0	0	0	0	0
Mettl11a	0	0	0	0	2	0	0
Pcx	16	0	0	0	0	0	0
Cks2	1	0	0	0	0	0	0
1700102P08Rik	0	0	0	0	1	0	0
Tie1	0	0	0	0	2	0	0
Nab1	0	0	0	0	1	0	0
Bag1	2	0	0	0	0	0	0
Bsg	0	0	0	0	5	0	0
Gpx8	0	0	0	0	2	0	0
Ccdc3	6	0	0	0	0	0	0
Bphl	1	0	0	0	14	0	0
Oit3	2	0	0	0	0	0	0
Gngt1	0	0	0	0	1	0	0
Cpa1	0	0	0	0	2	0	0
Itgb1bp1	3	0	0	0	0	0	0
Micalcl	0	0	0	0	1	0	0
1110032F04Rik	1	0	0	0	0	0	0
Gm8186	1	0	0	0	0	0	0
Acvr1c	1	0	0	0	0	0	0
Oasl1	0	0	0	0	2	0	0
Slc25a20	0	0	0	0	1	0	0
Zcchc24	11	0	0	0	0	0	0
Klc1	0	0	0	0	3	0	0
Ppif	10	0	0	0	0	0	0
Casp6	2	0	0	0	0	0	0
Aacs	1	0	1	0	0	0	0
Smarcd3	0	0	0	0	11	0	0
Itga7	0	0	0	0	1	0	0
Gm16517	0	0	0	0	5	0	0
Ubc	1	0	10	0	0	0	0
Pgam1	7	0	0	0	4	0	0
Gale	3	0	0	0	0	0	0
Megf9	2	0	0	0	0	0	0
Nol9	0	0	0	0	9	0	0
Cpa2	0	0	0	0	1	0	0
Gm17286	0	0	0	0	2	0	0
4930404A10Rik	0	0	0	0	1	0	0
Mtmr3	0	0	0	0	12	0	0
Tor1b	0	0	0	0	1	0	0
Gdf5	2	0	0	0	0	0	0
Morc3	1	0	0	0	0	0	0
Lpp	0	0	0	0	3	0	0
SNORA21	2	0	0	0	0	0	0
Gm5682	0	0	0	0	2	0	0
Ppp1r10	0	0	0	0	1	0	0
Mcts2	2	0	0	0	0	0	0
Cacng4	0	0	0	0	1	0	0
Adam11	0	0	0	0	15	0	0
H13	2	0	0	0	0	0	0
Blcap	4	0	0	0	0	0	0
Kiss1r	0	0	0	0	2	0	0
Cyp2d12	1	0	0	0	0	0	0
Gm13825	0	0	0	0	1	0	0
Telo2	1	0	0	0	0	0	0
Papln	0	0	0	0	3	0	0
Plk3	0	0	0	0	3	0	0
Nuak2	1	0	0	0	0	0	0
Tmem174	0	0	0	0	3	0	0
Golm1	0	0	0	0	2	0	0
Akt2	4	0	0	0	4	0	0
Uchl1	0	0	0	0	1	0	0
Gm9506	0	0	0	0	2	0	0
Gm20529	0	0	0	0	1	0	0
Tbc1d10c	13	0	0	0	0	0	0
4921513I03Rik	0	0	0	0	2	0	0
Gm15483	0	0	3	0	0	0	0
Eif2ak4	0	0	0	0	4	0	0
Dnm1	1	0	1	0	0	0	0
2810468N07Rik	1	0	0	0	0	0	0
Gjc1	0	0	0	0	16	0	0
Fzd7	0	0	2	0	0	0	0
Mir5107	1	0	0	0	0	0	0
Bbs1	1	0	0	0	0	0	0
Frmd6	0	0	0	0	5	0	0
Lin54	5	0	0	0	0	0	0
Ccnb2	3	0	0	0	0	0	0
Eln	0	0	0	0	1	0	0
Klhdc10	0	0	0	0	2	0	0
Srfbp1	0	0	0	0	1	0	0
snoU6	1	0	0	0	0	0	0
Ankrd46	5	0	0	0	0	0	0
Gm5915	0	0	0	0	3	0	0
Styx	4	0	0	0	0	0	0
Erbb3	0	0	0	0	2	0	0
Sept10	7	0	0	0	0	0	0
Surf4	3	0	0	0	1	0	0
Dnahc10	0	0	1	0	0	0	0
Smtnl2	2	0	0	0	2	0	0
Snora74a	1	0	0	0	0	0	0
Adipor1	0	0	0	0	8	0	0
Rassf10	0	0	0	0	1	0	0
Capza1	0	0	1	0	0	0	0
M6pr	0	0	0	0	1	0	0
C920025E04Rik	0	0	0	0	1	0	0
Pnkd	0	0	0	0	0	0	9
Rps15a	0	0	0	0	7	0	0
Auh	11	0	0	0	0	0	0
Nedd4l	3	0	0	0	0	0	0
Siglecg	3	0	0	0	0	0	0
Coq5	0	0	0	0	16	0	0
Cdc42	0	0	0	0	13	0	0
Evc2	0	0	0	0	2	0	0
Gm16494	0	0	4	0	0	0	0
Rhoc	0	0	2	0	0	0	0
Ywhaq	4	0	0	0	0	0	0
Wdr3	0	0	0	0	23	0	0
Tmed9	0	0	3	0	0	0	0
Bcl7b	0	0	0	0	2	0	0
Zbtb40	0	0	0	0	3	0	0
Plcl2	6	0	0	0	0	0	0
Zfhx3	0	0	1	0	0	0	0
Rpp30	0	0	0	0	1	0	0
Cela3b	0	0	0	0	4	0	0
Gm5601	0	0	0	0	1	0	0
Cobl	3	0	0	0	0	0	0
Med8	0	0	0	0	4	0	0
Phf21b	0	0	0	0	1	0	0
Timm9	0	0	0	0	1	0	0
Rnf10	0	0	0	0	16	0	0
Cel	0	0	0	0	1	0	0
Vdr	1	0	0	0	0	0	0
Mpp4	0	0	1	0	0	0	0
Sirt1	3	0	0	0	0	0	0
Ccdc63	1	0	0	0	0	0	0
Ppia	0	0	0	0	1	0	0
Trp53inp2	2	0	0	0	0	0	0
Lypla2	2	0	0	0	0	0	0
Grsf1	0	0	0	0	1	0	0
Mboat1	0	0	0	0	7	0	0
Gm13398	1	0	0	0	0	0	0
Klhl21	0	0	0	0	7	0	0
5930434B04Rik	4	0	0	0	1	0	0
Katna1	1	0	0	0	0	0	0
Zfp800	4	0	0	0	0	0	0
Gm10012	1	0	0	0	0	0	0
Scarna17	0	0	0	0	0	1	0
Mcm10	8	0	0	0	0	0	0
Doc2g	2	0	0	0	0	0	0
Psen1	0	0	0	0	3	0	0
Tfpi2	0	0	0	0	1	0	0
Psmb5	0	0	0	0	1	0	0
Brap	1	0	0	0	0	0	0
Hist4h4	2	0	0	0	1	0	0
Wdr19	0	0	0	0	3	0	0
Gfi1b	0	0	0	0	2	0	0
Fut7	3	0	0	0	0	0	0
Dact2	1	0	0	0	0	0	0
Tcea2	0	0	0	0	16	0	0
Tsga14	0	0	0	0	12	0	0
Med31	4	0	0	0	1	0	0
Slc4a5	0	0	0	0	2	0	0
Gm9396	1	0	0	0	0	0	0
Rpl21	7	0	0	0	0	0	0
Gm12735	0	0	0	0	10	0	0
Tmem125	0	0	0	0	3	0	0
Rhoa	0	0	0	0	1	0	0
Sdhd	0	0	0	0	1	0	0
Tm2d2	0	0	0	0	0	1	0
Gm11960	0	0	0	0	5	0	0
Pex6	0	0	9	0	0	0	0
Ces1g	1	0	0	0	0	0	0
Map3k10	3	0	0	0	1	0	0
Papolb	6	0	0	0	0	0	0
Sema4d	2	0	0	0	0	0	0
Ipo13	0	0	0	0	1	0	0
5S	0	0	0	0	5	0	0
D630013G24Rik	0	0	0	0	2	0	0
Ddx31	0	0	0	0	1	0	0
Lyplal1	0	0	0	0	6	0	0
Gm15423	0	0	0	0	0	1	0
Surf6	1	0	0	0	1	0	0
Ptpn4	0	0	0	0	1	0	0
Cpsf6	5	0	0	0	0	0	0
Gm13308	4	0	0	0	0	0	0
Gins1	0	0	0	0	1	0	0
1700012B07Rik	3	0	0	0	0	0	0
Sec14l4	0	0	0	0	7	0	0
3300002I08Rik	0	0	0	0	1	0	0
Rfk	11	0	0	0	0	0	0
Synj2bp	0	0	0	0	1	0	0
2010321M09Rik	6	0	6	0	0	0	0
AI846148	0	0	0	0	2	0	0
Gm10120	0	0	0	0	2	0	0
Dhx9	0	0	0	0	3	0	0
Peli3	1	0	0	0	0	0	0
Prim1	0	0	0	0	1	0	0
Zmynd19	3	0	0	0	0	0	0
Lrrc49	0	0	0	0	2	0	0
Palm2	0	0	0	0	3	0	0
Kcnh2	0	0	0	0	13	0	0
Mob1a	0	0	0	0	3	0	0
Ppp3cb	0	0	1	0	0	0	0
Ctsf	2	0	0	0	0	0	0
Hivep2	6	0	0	0	0	0	0
Polr2e	0	0	0	0	4	0	0
Ccdc71	0	0	0	0	1	0	0
Dlec1	0	0	0	0	1	0	0
B930086A06Rik	0	0	0	0	1	0	0
Hexdc	1	0	0	0	0	0	0
Gm14123	0	0	0	0	1	0	0
Mllt3	1	0	0	0	0	0	0
Dcaf5	2	0	0	0	0	0	0
2310061I04Rik	0	0	0	0	3	0	0
Cdc20	0	0	0	0	4	0	0
A830005F24Rik	0	0	0	0	2	0	0
Wbp2nl	3	0	0	0	0	0	0
Uqcr10	0	0	0	0	2	0	0
Radil	7	0	0	0	0	0	0
Tead1	0	0	0	0	9	0	0
Hsf2bp	9	0	0	0	0	0	0
Acot7	0	0	0	0	9	0	0
Klc4	0	0	8	0	0	0	0
Swi5	1	0	1	0	0	0	0
[truncated: 724 more rows]

## Sheet: 7c_DEHP
Supplemental Table 7c: Enhancer peaks linked to DEGs for 'DEHP over Veh' comparison (Figure 5)
Number of peaks in enhancers (for each histone mark) linked to DEGs (Enhancer Atlas, merged anchors)
Genes	Peak count for H3K27ac up peaks	Peak count for H3K4me1 up peaks	Peak count for H3K4me3 up peaks	M_liver_5mo_DEHP.over.VEH	Peak count for H3K27ac down peaks	Peak count for H3K4me1 down peaks	Peak count for H3K4me3 down peaks
Cyp2b9	0	0	0	2.80641	0	0	0
Saa2	0	0	0	2.30082	0	0	0
Spink6	0	0	0	2.19182	0	0	0
Cyp2a4	0	0	0	1.98908	0	0	0
Saa1	0	0	0	1.72707	0	0	0
Nnmt	12	0	9	1.69498	0	0	0
Crybb3	0	0	0	1.67759	0	0	0
Lcn2	4	0	0	1.45229	0	0	0
Zbtb16	21	0	11	1.32384	0	0	0
Lpin1	6	0	1	1.20312	0	0	0
Cyp2a22	0	0	0	1.20042	0	0	0
mt-Nd6	0	0	0	1.1681	0	0	0
Cyp4a14	0	0	0	1.1483	0	0	0
Mt1	0	0	0	1.12953	0	0	0
Saa3	0	0	0	1.01703	0	0	0
Serpina7	0	0	0	0.921361	0	0	0
Lars2	0	0	0	0.869988	0	0	0
Ppp1r10	38	0	0	0.822191	0	0	0
Rad51b	0	0	0	0.821386	0	0	0
Gadd45g	30	0	2	0.795558	0	0	0
Sds	0	0	0	0.784726	0	0	0
Plk3	0	0	0	0.782321	0	0	0
Noct	0	0	0	0.768573	0	0	0
Alas1	0	0	0	0.754191	0	0	0
Fgf21	0	0	2	0.752691	0	0	0
Mup18	0	0	0	0.710845	0	0	0
Igfbp1	0	0	0	0.707366	0	0	0
Hamp	1	0	0	0.691999	0	0	0
Orm2	1	0	0	0.656255	0	0	0
Mt2	0	0	0	0.648382	0	0	0
Mfsd2a	0	0	0	0.621978	0	0	0
Elovl6	0	0	0	0.599209	0	0	0
Gm20508	2	0	0	0	0	0	0
Hist1h4j	2	0	0	0	0	0	0
Klc4	0	0	0	0	1	0	0
Mlxipl	4	0	0	0	0	0	0
Hspa8	1	0	1	0	0	0	0
Gm14005	1	0	0	0	0	0	0
Fam76b	4	1	0	0	0	0	0
4930566F21Rik	1	0	0	0	0	0	0
Vps13d	6	0	0	0	0	0	1
Gm7030	1	0	0	0	0	0	0
Gcc1	5	0	0	0	0	0	0
Tbxas1	2	0	0	0	0	0	0
Gm11964	0	0	1	0	0	0	0
Usp10	1	0	0	0	0	0	0
Rnf112	1	0	0	0	0	0	0
Gm16049	1	0	0	0	0	0	0
Mrps21	7	0	0	0	0	0	0
Pabpc1	1	0	0	0	0	0	0
Ctbp1	1	0	0	0	0	0	0
Gm13292	3	0	0	0	0	0	0
Suclg1	1	1	0	0	0	0	0
Clcc1	0	18	0	0	0	0	0
Sra1	17	0	0	0	0	0	0
Tmem106c	2	0	0	0	0	0	0
Mmp20	2	0	0	0	0	0	0
Cand2	3	0	0	0	0	0	0
Ptpn12	4	0	0	0	0	0	0
BC025446	0	0	5	0	0	0	0
D730039F16Rik	1	0	0	0	0	0	0
Olfr1346	0	0	0	0	0	0	1
Gm12517	0	5	0	0	0	0	0
0610031J06Rik	12	32	0	0	0	0	0
Slfn9	5	0	0	0	0	0	3
Tmem90a	4	0	0	0	0	0	0
Duox1	1	0	0	0	0	0	0
Capn12	0	0	0	0	0	0	4
Pole2	6	0	0	0	0	0	0
Olfr164	4	0	0	0	0	0	0
Col15a1	17	0	0	0	0	0	0
Hyal6	1	0	0	0	0	0	0
Chchd1	1	0	0	0	0	0	0
Snora65	3	0	0	0	0	0	0
Ptpn2	1	0	0	0	0	0	0
U2af1l4	1	0	0	0	0	0	0
Tfam	3	0	0	0	0	0	0
Mrpl40	8	0	0	0	0	0	0
Flnb	2	0	0	0	0	0	0
Tmem63b	8	0	0	0	0	0	0
2210021J22Rik	0	14	0	0	0	0	0
Rbp4	11	0	0	0	0	0	0
Gm10343	1	0	0	0	0	0	0
Ubqln4	17	64	0	0	0	0	0
Fzd9	1	0	0	0	0	0	0
Dennd1b	0	0	0	0	3	0	0
Ggta1	46	0	0	0	2	0	0
Gm13610	3	0	0	0	0	0	0
Nek2	7	7	0	0	0	0	0
Dhcr24	3	0	0	0	0	0	0
Klhdc1	7	0	0	0	0	0	0
Pex11a	1	0	0	0	0	0	0
L2hgdh	7	0	0	0	0	0	0
Dock6	0	0	1	0	0	0	0
Fam105a	8	0	0	0	0	0	0
Rab43	2	0	0	0	0	0	0
Eif2b2	6	4	0	0	0	0	0
Gpn1	4	9	0	0	0	0	0
Ddah2	2	0	0	0	0	0	0
Bglap2	7	16	0	0	0	0	0
Ooep	2	0	0	0	0	0	0
Gm20537	4	0	0	0	0	0	0
Gm11631	0	0	1	0	0	0	0
Nol9	0	3	0	0	1	0	4
U3	1	0	0	0	0	0	0
Tbc1d22a	0	18	0	0	0	0	0
Gm15673	0	0	2	0	0	0	0
Gm11957	3	0	0	0	0	0	0
Strbp	1	0	0	0	0	0	0
Atp5s	9	0	0	0	0	0	0
Arl10	0	5	0	0	0	0	0
Mbnl2	6	0	0	0	0	0	0
Rtkn	1	0	0	0	0	0	0
Ambra1	1	0	0	0	0	0	0
Serp2	6	0	0	0	0	0	0
Uso1	1	0	0	0	0	0	0
Gm17489	1	0	0	0	0	0	0
Mpp3	0	2	0	0	0	0	0
Spry4	21	0	0	0	0	0	0
Gm4969	0	4	0	0	0	0	0
Foxa3	3	0	0	0	0	0	0
Cic	1	0	0	0	0	0	0
Kcnh1	4	4	0	0	0	0	0
Slc22a27	1	0	0	0	1	0	0
Lrp4	1	0	0	0	0	0	0
Polr1b	4	0	0	0	0	0	0
Gm4246	3	0	0	0	0	0	0
Narg2	3	0	0	0	0	0	0
AI314180	1	0	0	0	0	0	0
Pcp2	1	0	0	0	0	0	0
Palm2	0	1	0	0	0	0	0
AB041803	0	0	0	0	0	0	1
Nkx1	0	2	0	0	0	0	0
Dbn1	1	0	0	0	0	0	0
Lpp	5	0	0	0	0	0	0
Cblc	0	2	0	0	0	0	0
Ccdc117	0	0	3	0	0	0	0
Sf3b4	13	0	0	0	0	0	0
Sdhc	5	0	0	0	0	0	0
Bcr	2	0	0	0	0	0	0
Gm13094	13	0	0	0	0	0	0
Lrrc8a	1	0	0	0	0	0	0
Ift172	1	6	0	0	0	0	0
1110008P14Rik	6	0	0	0	0	0	0
Igsf6	1	0	0	0	0	0	0
Gfm2	3	0	0	0	0	0	0
Hist1h2br	1	0	0	0	0	0	0
Dlgap4	6	0	0	0	0	0	0
Rela	13	0	0	0	0	0	0
Fastkd1	7	0	0	0	0	0	0
Celsr1	0	17	0	0	0	0	0
Tspan14	3	0	0	0	0	0	0
AC122057.1	1	0	0	0	0	0	0
A430078I02Rik	2	0	0	0	0	0	0
Y	1	0	0	0	0	0	0
Gm11932	1	0	0	0	0	0	0
Slc31a1	10	0	0	0	0	0	0
Nup85	8	0	0	0	0	0	0
Dio1	0	0	0	0	0	0	5
Hspb1	1	0	0	0	0	0	0
Rtn2	2	12	0	0	0	0	0
Cbfb	3	0	0	0	0	0	0
C030034L19Rik	9	0	0	0	0	0	0
Snord32a	0	0	3	0	0	0	0
Apol6	1	0	0	0	0	0	0
Brf1	23	0	0	0	0	0	0
Wdr4	12	0	0	0	0	0	0
Far1	5	0	0	0	0	0	0
Dennd1c	8	0	0	0	0	0	0
Fpgs	8	0	0	0	0	0	0
Ggh	0	0	0	0	0	1	0
Gm15968	0	0	0	0	1	0	0
Col6a2	1	0	0	0	0	0	0
Arhgap26	12	0	0	0	0	0	0
Raet1d	1	0	0	0	0	0	0
Lman2	1	0	0	0	0	0	0
Ctsk	1	0	0	0	0	0	0
Gm10052	3	0	0	0	0	0	0
Gm12609	3	0	0	0	0	0	0
Plekhg5	0	2	0	0	0	0	6
Gm13537	3	0	0	0	0	0	0
Hist2h2ab	10	0	0	0	0	0	0
Mmp24	4	3	0	0	0	0	0
5730455O13Rik	11	0	0	0	0	0	0
Memo1	2	0	0	0	0	0	0
Adra1a	5	0	0	0	0	0	0
Pcdh12	10	0	0	0	0	0	0
Mfsd3	10	0	7	0	0	0	0
Gm10420	4	0	0	0	0	0	0
4932415G12Rik	0	2	0	0	0	0	0
Lrsam1	9	0	0	0	0	0	0
Ccr1l1	1	0	0	0	0	0	0
Pcbp3	8	0	0	0	0	0	0
A430110L20Rik	5	0	0	0	0	0	1
Clptm1	0	10	0	0	0	0	0
Mettl21d	15	0	0	0	0	0	0
Hk2	12	0	0	0	0	0	0
Tcf21	12	0	0	0	0	0	0
Myof	18	0	0	0	0	0	0
Isoc2b	2	0	0	0	0	0	0
Lat2	1	0	0	0	0	0	0
Sipa1l1	12	0	0	0	0	0	0
Foxj2	6	0	0	0	0	0	0
Phxr2	1	0	0	0	0	0	0
Gzma	0	0	2	0	0	0	0
Gm2301	1	0	0	0	0	0	0
Harbi1	1	0	0	0	0	0	0
Camk2b	0	0	2	0	0	0	0
Snord35a	0	0	3	0	0	0	0
Socs1	1	0	0	0	0	0	0
St6galnac4	7	0	0	0	0	0	0
BC020535	2	0	3	0	0	0	0
Eif6	8	7	0	0	0	0	0
Ndufa8	15	0	0	0	0	0	0
Dtx2	2	0	0	0	0	0	0
Mmab	0	0	6	0	0	0	0
Syde1	1	0	0	0	0	0	0
Gpr152	7	0	0	0	0	0	0
Drd1a	4	4	0	0	0	0	0
Gcm2	3	0	0	0	0	0	0
Zbtb34	4	0	0	0	0	0	0
Gm13523	2	0	0	0	0	0	0
Gm13444	5	0	0	0	0	0	0
Rdh5	17	0	0	0	0	0	0
Cox4nb	16	0	0	0	0	0	3
Taf5	13	0	0	0	0	0	0
Cdc27	4	0	0	0	2	0	0
Ccdc149	4	0	0	0	0	0	0
2300009A05Rik	18	0	0	0	0	0	0
Dopey2	0	0	1	0	0	0	0
Clpp	6	0	0	0	0	0	0
Hnrnpf	0	2	0	0	0	0	0
Pld1	2	0	0	0	0	0	0
Gm13110	0	0	0	0	2	0	0
4933408J17Rik	0	1	0	0	0	0	0
Gnpda1	26	0	0	0	0	0	0
Tomm40	0	7	0	0	0	0	0
P2ry13	2	0	0	0	0	0	0
Mapk1ip1l	2	0	0	0	0	0	0
Cd9	2	0	0	0	0	0	0
Cldn5	2	0	0	0	0	0	0
Gm17370	1	0	0	0	0	0	0
Snora61	0	0	0	0	0	0	1
Ccdc155	0	0	2	0	0	0	0
Gm11694	4	0	0	0	0	0	0
Dnajc21	2	1	0	0	0	0	0
Gm13443	28	0	0	0	2	0	0
Gm15197	1	0	0	0	0	0	0
Mir3066	1	0	1	0	0	0	0
Ggcx	15	10	0	0	0	0	0
Mamdc4	11	0	0	0	0	0	0
Mfap4	1	0	0	0	0	0	0
Gtf2f2	1	0	0	0	0	0	0
Gm9574	6	0	0	0	0	0	0
Mtap9	7	3	0	0	0	0	0
Bloc1s1	19	0	0	0	0	0	0
Nmnat1	27	0	0	0	0	0	6
Iqch	5	0	0	0	0	0	0
Tmem48	0	2	0	0	0	0	5
Mfap5	1	0	0	0	0	0	0
Zfp82	1	0	0	0	0	0	0
Lrrc24	11	0	8	0	0	0	0
Gm10647	3	0	0	0	0	0	0
Atl3	0	0	0	0	1	0	0
Gzmk	0	0	2	0	0	0	0
Gm13559	0	2	0	0	0	0	0
Arf5	7	0	0	0	0	0	0
Htra2	2	0	0	0	0	0	0
Mpzl3	5	0	0	0	0	0	0
Slc47a1	1	0	0	0	0	0	0
Nsa2	1	0	0	0	0	0	0
Gm7694	0	0	0	0	3	0	0
Stk4	2	0	0	0	0	0	0
Sh2d1b1	0	0	0	0	3	0	0
Sult2b1	0	0	1	0	0	0	0
Ptgds	10	0	0	0	0	0	0
Gm17670	5	0	0	0	0	0	0
Eprs	0	4	0	0	0	0	0
Pccb	1	0	0	0	0	0	0
Gm8813	6	0	0	0	0	0	0
D730040F13Rik	0	0	0	0	0	0	3
Spice1	0	8	0	0	0	0	0
Ube3b	1	0	7	0	0	0	0
Pcsk1n	0	1	0	0	0	0	0
Adra1d	4	0	0	0	0	0	0
Rab40b	2	0	0	0	0	0	0
Gm17716	7	0	0	0	0	0	0
Nfatc2	16	0	25	0	0	0	0
Cebpb	3	1	0	0	0	0	0
Gstt2	1	0	0	0	0	0	0
Plp2	0	3	0	0	0	0	0
Syt11	8	19	0	0	0	0	0
Hr	14	0	0	0	7	0	0
C330019G07Rik	3	0	0	0	0	0	0
1700093J21Rik	1	0	0	0	0	0	0
Pgm1	3	0	0	0	0	0	0
Gtpbp8	3	7	0	0	0	0	0
Aacs	5	0	0	0	0	7	0
Id2	3	0	0	0	0	0	0
Smg5	14	32	0	0	0	0	0
Ifit3	2	0	0	0	0	0	0
Ppp1r13l	0	11	0	0	0	0	0
Gm14251	5	0	0	0	0	0	0
Azin1	26	0	0	0	0	0	0
Fam55d	5	0	5	0	0	0	0
Rnft1	2	0	0	0	0	0	0
Tmem87a	3	0	0	0	0	0	0
1600002D24Rik	3	0	0	0	0	0	0
Mxd1	3	0	0	0	0	0	0
Siva1	29	0	0	0	0	0	0
Slc35e3	1	0	0	0	0	0	0
Scaf4	2	0	0	0	0	0	0
Gm13070	3	0	0	0	0	0	0
Plekho1	10	0	0	0	0	0	0
Acy3	2	0	0	0	0	0	0
BC026590	0	0	0	0	0	0	2
RP23	21	10	12	0	0	0	0
Trim17	0	3	0	0	0	0	0
Ptprv	1	0	0	0	0	0	0
Snrpd2	5	12	0	0	0	0	0
Myzap	7	0	0	0	0	0	0
Gemin7	0	10	0	0	0	0	0
Slc30a6	2	0	0	0	0	0	0
Gm9034	1	0	0	0	2	0	0
Btbd10	7	0	0	0	0	0	0
Cyp4f17	0	0	0	0	0	0	1
H3f3c	0	0	1	0	0	0	0
Tns3	37	2	0	0	0	0	0
Dera	0	2	0	0	0	0	0
BC031781	1	0	0	0	0	0	3
Fkbp14	2	0	0	0	0	0	0
Klk1b5	0	0	2	0	0	0	0
Mdm2	1	0	0	0	0	0	0
Bai1	0	0	2	0	0	0	0
Stard10	0	0	10	0	0	0	0
Abhd6	3	0	0	0	0	0	0
Ifit2	1	0	0	0	0	0	0
Nrbp1	1	3	0	0	0	0	0
Wscd2	1	0	0	0	0	0	0
Ppp2r5d	0	0	0	0	1	0	0
Angptl2	5	0	0	0	0	0	0
Serping1	1	0	0	0	0	0	0
Nr1i3	0	0	1	0	0	0	0
Ecm1	2	0	0	0	0	0	0
Gm9929	1	0	0	0	0	0	0
Cdc16	0	8	0	0	0	0	0
Ppp1r7	6	0	0	0	0	0	0
Add3	4	0	0	0	0	0	0
Gm14286	5	0	0	0	0	0	0
Egr2	2	0	0	0	0	0	0
Kdelr1	0	0	5	0	0	0	0
Kif1b	8	0	0	0	0	0	7
Cd164	1	0	0	0	0	0	0
Gm6623	1	0	0	0	0	0	0
Gm5616	3	0	1	0	0	0	0
2010003K11Rik	9	0	0	0	0	0	0
Ptrh2	14	0	0	0	0	0	0
Cbr3	0	0	2	0	0	0	0
Suox	3	0	0	0	0	0	0
SNORA26	2	0	0	0	0	0	0
Mir499	1	0	0	0	0	0	0
Ccdc90b	1	0	0	0	0	0	0
Esm1	0	0	1	0	0	0	0
Ncor2	5	0	0	0	0	3	0
Rrs1	1	0	0	0	0	0	0
Vamp1	2	0	0	0	0	0	0
Spred1	6	0	0	0	0	0	0
Gm9821	1	0	0	0	0	0	0
Chd1l	1	0	0	0	0	0	0
Slc12a4	1	0	0	0	0	0	0
Rit1	16	66	0	0	0	0	0
Prr11	10	0	0	0	0	0	0
Wfdc2	2	1	0	0	0	0	0
Cacna1c	3	8	0	0	0	0	0
Ambp	2	0	0	0	0	0	0
Rell2	1	0	0	0	0	0	0
Commd7	3	0	0	0	0	0	0
Gm17416	0	0	1	0	0	0	0
1110014N23Rik	4	0	0	0	0	0	0
Eif3j	9	0	0	0	0	0	0
Casc1	0	0	0	0	0	0	1
Rpl7a	2	0	0	0	0	0	0
Slfn2	8	0	0	0	0	0	4
Gm13064	9	0	0	0	0	0	0
Mmp19	6	0	0	0	0	0	0
Agpat3	2	0	0	0	0	0	0
Gm11541	1	0	0	0	0	0	0
Rpl15	0	0	7	0	0	0	0
Podn	2	0	0	0	0	0	0
SNORA77	1	0	0	0	0	0	0
Ube2g2	5	0	0	0	0	0	0
Erc1	2	0	0	0	0	0	0
Pex5l	0	0	2	0	0	0	0
Gm17209	0	2	0	0	0	0	0
Sec1	0	0	1	0	0	0	0
Jhdm1d	2	0	0	0	0	0	0
Tmem150a	16	10	0	0	0	0	0
Rabepk	2	0	0	0	0	0	0
Gch1	1	0	0	0	0	0	0
Evl	5	0	0	0	0	0	0
Parp10	6	0	2	0	0	0	0
Hsf2bp	2	0	0	0	0	0	0
Vmn1r65	0	0	0	0	0	0	4
F830045P16Rik	2	0	0	0	0	0	0
Smarcc2	1	0	0	0	0	0	0
Cacnb4	1	0	0	0	0	0	0
Nol12	0	3	0	0	0	0	0
Tmco6	16	0	0	0	0	0	0
Cnrip1	0	0	0	0	1	0	0
Trim56	0	0	0	0	0	0	1
Gm15967	0	0	0	0	1	0	0
Prkab2	2	0	0	0	0	0	0
Rad52	5	0	0	0	0	0	0
Fam20a	1	0	0	0	0	0	0
Uap1	0	0	0	0	5	0	0
Mmrn2	1	0	0	0	0	0	3
Zfp78	0	0	0	0	0	0	5
Gm9104	1	0	0	0	0	0	0
Foxn2	0	3	0	0	0	0	0
Fbxo9	2	0	0	0	0	0	0
Gm4705	7	0	0	0	0	0	0
Diras2	0	0	1	0	0	0	0
Mkln1	2	2	0	0	0	0	4
Fam18a	7	1	1	0	0	0	0
Hsf1	8	0	6	0	0	0	0
Fam151a	1	0	0	0	0	0	0
Snord12	1	0	0	0	0	0	0
Slc12a5	0	1	0	0	0	0	0
Galk1	2	0	0	0	0	0	0
Emp3	0	0	2	0	0	0	0
Shisa4	2	0	0	0	0	0	0
Snrnp70	0	0	7	0	0	0	0
Zfp759	0	0	0	0	0	0	1
Apold1	0	3	0	0	0	0	0
Nedd4	2	0	0	0	0	0	0
Metrnl	1	0	0	0	0	0	0
Gm18604	1	0	0	0	0	0	0
Fbxw7	20	0	0	0	0	0	0
Itgb8	15	0	0	0	0	0	0
Gna14	0	0	0	0	0	0	3
Prima1	3	0	0	0	0	0	0
Cnn1	0	0	8	0	0	0	0
Gm17146	4	15	0	0	0	0	0
Tmem189	1	0	0	0	0	0	0
Gm13549	0	0	2	0	0	0	0
Amotl1	2	0	0	0	0	0	0
Snhg12	0	0	0	0	0	0	1
Pde4d	2	0	0	0	0	0	0
Gm12731	1	0	0	0	0	0	0
4930471M09Rik	2	0	0	0	0	0	0
Dhx15	5	0	0	0	0	0	0
Birc2	18	0	0	0	0	0	0
Ino80d	3	0	0	0	0	0	0
Ankrd49	7	0	0	0	0	0	0
Gm10146	1	0	0	0	0	0	0
Pank2	4	0	0	0	0	0	0
Zfp444	0	0	0	0	0	0	14
Gpr139	0	2	0	0	0	0	0
Gm5921	0	3	0	0	0	0	0
Rpusd2	0	0	2	0	0	0	0
Syt15	0	0	1	0	0	0	0
Gm17089	2	0	0	0	0	0	0
Serpina1b	2	0	0	0	0	0	0
Gm15495	2	2	0	0	0	0	0
Spon2	1	0	0	0	0	0	0
Socs4	2	0	0	0	0	0	0
Gtf2h4	61	0	0	0	0	0	0
Tmem165	0	2	0	0	0	0	0
Gm14154	3	0	0	0	0	0	0
Nsf	1	0	0	0	0	0	0
Tmem59	0	3	0	0	0	0	5
Nkx6	0	0	2	0	0	0	0
Gm16508	1	0	0	0	0	0	0
Trim11	0	2	0	0	0	0	0
Gng10	2	0	0	0	0	0	0
Gm15798	6	0	0	0	0	0	0
D630042F21Rik	4	0	0	0	0	0	0
Brix1	3	1	0	0	0	0	0
Sned1	5	0	0	0	0	0	0
Ccl9	2	0	0	0	0	0	0
Asb2	6	0	0	0	0	0	0
Cryaa	6	0	0	0	0	0	0
Srsf1	0	0	0	0	1	0	0
Sept2	1	0	0	0	0	0	0
Zfp39	0	3	0	0	0	0	0
Itgb5	0	1	0	0	0	0	0
Chad	1	0	0	0	0	0	0
Thbd	1	0	0	0	0	0	0
Gm16334	0	1	0	0	0	0	0
Blcap	12	0	0	0	0	0	3
2410066E13Rik	3	0	0	0	0	0	0
Epb4.1l4b	0	0	0	0	0	0	3
Tmem143	0	0	3	0	0	0	0
Cse1l	7	1	0	0	0	0	0
Pigt	8	3	0	0	0	0	0
Fcgrt	0	0	1	0	0	0	0
Polr3e	8	0	0	0	0	0	0
Gm12570	0	1	0	0	0	0	0
Eif3k	0	0	0	0	0	0	4
BC023719	2	0	0	0	0	0	0
Gm13012	1	2	0	0	0	0	0
Tnni1	11	0	0	0	0	0	0
Rem1	0	0	2	0	0	0	0
Rab7	1	0	0	0	0	0	0
Ttc38	0	13	0	0	0	0	0
Fam18b	11	0	0	0	0	0	0
Ighg1	1	0	0	0	0	0	0
Rapgefl1	0	0	1	0	0	0	0
Cck	1	0	0	0	0	0	0
Fbxo48	0	0	0	0	2	0	0
Lgr5	2	0	0	0	0	0	0
Zfp647	6	0	4	0	0	0	0
Gm12919	0	0	0	0	0	0	1
Eml2	4	8	0	0	0	0	0
Kcnj14	0	0	3	0	0	0	0
E130317F20Rik	0	0	3	0	0	0	0
A230051G13Rik	0	3	0	0	0	0	0
Phlda1	6	0	0	0	0	0	2
Gm8580	0	3	0	0	0	0	0
2010204K13Rik	0	1	0	0	0	0	0
Mcm6	16	0	0	0	0	0	0
Gpaa1	9	0	6	0	0	0	0
Bop1	9	0	6	0	0	0	0
Klrk1	1	0	0	0	0	0	0
Mir342	2	0	0	0	0	0	0
P2ry14	1	0	0	0	0	0	0
Pak1ip1	5	0	0	0	0	0	0
Fbxw10	3	0	0	0	0	0	0
snoZ178	2	0	0	0	0	0	0
1110034A24Rik	12	0	0	0	0	0	0
Grap2	2	0	0	0	0	0	0
Ldlrad1	0	2	0	0	0	0	4
Rpp14	4	0	0	0	0	0	0
D330050G23Rik	1	0	0	0	0	0	0
Stau1	7	1	0	0	0	0	0
Lsm3	17	0	0	0	0	0	0
Cox6b1	4	0	0	0	0	0	0
Phf20l1	1	0	0	0	0	0	0
4933437N03Rik	1	0	0	0	0	0	0
Dnajb6	0	1	0	0	0	0	0
Kcnc3	0	0	5	0	0	0	0
Iglc2	3	0	0	0	0	0	0
Tnfaip3	1	1	0	0	0	0	0
Dab2	3	0	0	0	0	0	0
5330417C22Rik	0	4	0	0	0	0	0
Gm6517	1	0	0	0	0	0	0
Zfp385a	0	0	11	0	0	0	0
Pcid2	0	2	0	0	0	0	0
2010002N04Rik	0	10	15	0	0	0	0
Birc3	19	0	0	0	0	0	0
Sdc4	7	0	0	0	0	0	0
U4	3	0	5	0	0	0	0
Kidins220	5	0	0	0	0	0	0
Ufsp1	0	0	0	0	0	0	1
Notch3	2	0	0	0	0	0	0
Arhgef16	0	0	0	0	1	0	0
Pigx	2	0	0	0	0	0	0
Rhov	0	0	2	0	0	0	0
Upp2	0	2	0	0	0	0	0
Tchp	0	0	1	0	0	0	0
Gm11019	1	0	0	0	0	0	0
Bmp7	15	5	0	0	0	0	0
Rnpep	2	0	0	0	0	0	0
6530409C15Rik	1	0	0	0	0	0	0
Tdp2	0	0	2	0	0	0	0
Zcchc2	1	0	0	0	0	0	0
9030625A04Rik	5	0	0	0	0	0	0
Qrsl1	7	0	0	0	2	0	0
Fam3b	4	0	0	0	0	0	0
Nlrp9b	0	1	0	0	0	0	0
SNORA31	2	0	0	0	0	0	0
Ick	2	0	0	0	0	0	0
Mpz	1	0	0	0	0	0	0
Sac3d1	1	0	0	0	0	0	0
Pex6	0	0	0	0	1	0	0
Nmnat2	1	0	0	0	0	0	0
D230025D16Rik	4	0	0	0	0	0	0
Usp1	1	0	0	0	0	0	0
BB114351	0	0	0	0	1	0	0
Zfp462	5	0	0	0	0	0	0
Nudcd1	2	0	0	0	0	0	0
Smok4a	1	0	0	0	0	0	0
Zfp239	0	1	0	0	0	0	0
Ccdc159	0	0	5	0	0	0	0
Gga1	0	3	0	0	0	0	0
Gm16188	4	0	0	0	0	0	0
Dnajc8	0	0	0	0	0	0	1
Ak3	2	0	0	0	0	0	0
2010111I01Rik	8	0	0	0	0	0	0
Rnf207	0	8	0	0	0	0	6
BC032203	0	0	0	0	1	0	0
Pamr1	3	0	0	0	0	0	0
AL672259.1	3	0	0	0	0	0	0
Nmur1	2	0	0	0	0	0	0
Gm15483	6	0	0	0	0	0	0
Dnajb7	2	0	1	0	0	0	0
Tnrc6b	1	0	0	0	0	0	0
Slc25a47	3	0	0	0	0	0	0
Atf7ip	8	0	0	0	0	0	0
St13	2	0	3	0	0	0	0
Sectm1b	3	0	0	0	0	0	0
Dok2	11	0	0	0	4	0	0
Gm13230	1	0	0	0	0	0	0
Vamp5	14	10	0	0	0	0	0
SNORD16	1	0	0	0	0	0	0
Sh2d4a	4	0	0	0	0	0	0
Ms4a6b	4	0	8	0	0	0	0
Tmf1	0	1	0	0	0	0	0
Smad6	10	0	0	0	0	0	0
Piwil4	2	0	0	0	0	0	0
Cenpb	4	0	0	0	0	0	0
Sc4mol	7	0	0	0	0	0	0
Axl	3	2	0	0	0	0	0
Itgb2	5	0	0	0	0	0	0
Gm17782	3	0	0	0	0	0	0
Rock2	25	0	14	0	0	0	0
Rbm19	1	0	0	0	0	0	0
Gm8818	2	0	0	0	0	0	0
Rbp7	9	0	0	0	0	0	6
Gm17104	1	0	0	0	0	0	0
Sept4	0	0	0	0	1	0	0
C8g	11	0	0	0	0	0	0
Fzd2	0	4	0	0	0	0	0
Gm15706	0	0	0	0	0	0	2
Klhl2	9	0	0	0	0	0	0
Snord22	1	0	0	0	0	0	0
Gm15937	2	0	0	0	0	0	0
Cdc42ep1	0	3	0	0	0	0	0
Stard3	0	0	3	0	0	0	0
Exoc3l	3	0	0	0	0	0	0
Ccl20	1	0	0	0	0	0	0
Maml2	7	5	0	0	0	0	0
2010305A19Rik	1	0	0	0	0	0	0
Etl4	1	0	0	0	0	0	0
Pnmt	0	0	3	0	0	0	0
Foxc2	4	0	0	0	0	0	0
Gpr132	25	0	0	0	0	0	0
BC029214	6	0	0	0	0	0	0
4930572J05Rik	0	0	6	0	0	0	0
Ythdf2	0	0	0	0	0	0	3
Porcn	0	1	0	0	0	0	0
Hnrnpul1	3	2	0	0	0	0	0
Gm757	2	0	0	0	0	0	0
Bzrap1	0	0	0	0	1	0	0
Cdc5l	3	0	0	0	0	0	0
Nt5c	9	0	0	0	0	0	0
Asxl1	5	0	0	0	0	0	0
Rpl13a	0	0	5	0	0	0	0
Prpf19	1	1	0	0	0	0	0
Klf10	24	0	0	0	0	0	0
Ppp2r2a	6	0	0	0	0	0	0
Pi4k2b	1	0	0	0	0	0	0
Ppp6r1	1	0	0	0	0	0	0
Fam175b	0	2	0	0	0	0	0
Haus3	0	0	0	0	1	0	0
Armc8	0	0	0	0	2	0	0
Hsf4	4	0	0	0	0	0	0
AC122459.1	2	0	0	0	0	0	0
Nelf	6	0	0	0	0	0	0
Slc22a19	0	0	0	0	1	0	0
Lgals7	0	0	0	0	0	0	4
C920011F04Rik	1	0	0	0	0	0	0
Camk2n2	7	0	0	0	0	0	0
P2ry2	0	0	3	0	0	0	0
Lrrc3	1	0	0	0	0	0	0
Gm12870	0	2	0	0	0	0	3
Hars2	13	0	0	0	0	0	0
Olfml1	0	1	0	0	0	0	0
Gm12258	0	2	0	0	0	0	0
Phf13	0	3	0	0	1	0	6
Clec12a	2	0	0	0	0	0	0
Stk35	4	0	0	0	0	0	0
Shf	4	0	0	0	0	0	0
Gpr176	4	0	0	0	0	0	0
Mos	1	0	0	0	0	0	0
Apoc1	0	8	0	0	0	0	0
Ubqln2	4	0	0	0	0	0	0
Slc52a2	10	0	8	0	0	0	0
Esyt2	0	0	6	0	0	0	0
4732471D19Rik	1	3	0	0	0	0	0
Ppig	4	0	0	0	0	0	0
Bace2	1	0	0	0	0	0	0
Gm11775	1	0	0	0	0	0	0
Vps18	0	0	3	0	0	0	0
Gm10736	1	0	0	0	0	0	0
Tm4sf20	6	0	0	0	0	0	0
Fam70b	0	2	0	0	0	0	0
Stk38l	2	0	0	0	0	0	0
Ccdc6	3	0	0	0	0	0	0
2200002D01Rik	0	0	0	0	0	0	3
Gm14086	1	0	0	0	0	0	0
Gm15328	0	0	0	0	0	0	1
Ddx59	0	0	3	0	1	0	0
Trappc6a	0	10	0	0	0	0	0
Khsrp	6	0	0	0	0	0	0
Zfp408	1	0	0	0	0	0	0
Osbpl9	1	0	0	0	0	0	0
Usp30	8	0	9	0	0	0	0
Slc44a1	1	0	0	0	0	0	0
B4galt5	7	2	0	0	0	0	0
Mxi1	2	0	0	0	0	0	0
Ctsw	7	0	0	0	0	0	0
Hoxc5	0	0	1	0	0	0	0
Ceacam20	0	1	0	0	0	0	0
Galnt12	19	0	0	0	0	0	0
Dppa3	2	0	0	0	0	0	0
Gm9025	3	0	0	0	0	0	0
Slc25a44	16	42	0	0	0	0	0
Scarb2	2	0	0	0	0	0	0
Msl1	0	0	1	0	0	0	0
Ube2k	1	0	0	0	0	0	0
Sumo3	4	0	0	0	0	0	0
Zfp639	0	0	6	0	0	0	0
Gm6792	0	0	0	0	0	0	2
Syn2	4	0	0	0	0	0	0
4930439A04Rik	3	0	0	0	0	0	0
Fut1	0	0	1	0	0	0	0
Gas8	0	13	0	0	0	0	0
Dnajc2	1	0	0	0	0	0	0
Hist1h3i	2	0	0	0	0	0	0
Abca8b	1	0	0	0	0	0	0
Mtap	4	0	0	0	0	0	0
Clpb	0	0	6	0	0	0	0
Wdr52	0	4	0	0	0	0	0
Tff2	1	0	0	0	0	0	0
Tulp2	0	0	3	0	0	0	0
Gm7713	2	0	0	0	0	0	0
E130006D01Rik	1	0	0	0	0	0	0
Slc7a13	0	0	0	0	0	1	0
Art2a	0	0	4	0	0	0	0
Anxa7	4	0	0	0	0	0	0
A930028C08Rik	1	0	0	0	0	0	3
Gm16538	4	0	0	0	0	0	0
Gm13784	0	0	4	0	0	0	0
Hes3	0	4	0	0	0	0	2
Nuak1	11	0	0	0	0	0	0
Raf1	6	0	0	0	0	0	0
Abcc5	11	0	0	0	0	0	0
2410002F23Rik	0	0	1	0	0	0	0
Ccbp2	0	0	0	0	0	0	2
SNORA22	1	0	0	0	0	0	0
Lrrc18	2	0	0	0	0	0	0
Txnrd3	5	0	0	0	0	0	0
2700050L05Rik	6	0	0	0	0	0	0
Malt1	0	1	0	0	0	0	0
Gipr	2	6	0	0	0	0	0
Gm15756	0	4	0	0	0	0	0
0610040J01Rik	5	0	0	0	0	0	0
Bag6	3	0	0	0	0	0	0
Vipr2	0	0	4	0	0	0	0
Adamts15	2	0	0	0	0	0	0
Pank4	0	0	0	0	3	0	0
Gpx4	0	0	4	0	0	0	0
Gpr87	2	0	0	0	0	0	0
Mex3a	17	56	0	0	0	0	0
Gm13067	3	0	0	0	0	0	0
Mansc1	0	4	0	0	0	0	0
Bbs5	1	0	0	0	0	0	0
Nap1l1	3	0	0	0	0	0	2
H1f0	0	2	0	0	0	0	0
Th1l	5	0	0	0	0	0	0
1500002F19Rik	0	2	0	0	0	0	0
Acd	2	0	0	0	0	0	0
Usp38	3	0	0	0	0	0	0
Gm17147	5	0	0	0	0	0	0
Dedd	7	0	3	0	0	0	0
Gse1	16	0	0	0	0	0	3
Recql5	3	0	0	0	0	0	0
Dhrs7c	2	0	0	0	0	0	0
Hsd17b2	1	0	0	0	0	0	0
Med18	0	0	0	0	0	0	1
Pqlc3	26	0	15	0	0	0	0
Usp20	19	0	0	0	0	0	0
Ltbp3	13	0	0	0	0	0	0
1700001O22Rik	19	0	0	0	0	0	0
Htr3b	0	0	1	0	0	0	0
Neurl2	3	4	0	0	0	0	0
Defb45	0	0	1	0	0	0	0
Ints8	0	0	0	0	0	0	7
Mir3079	2	0	2	0	0	0	0
Tmub2	0	5	0	0	0	0	0
Gm12610	2	0	0	0	0	0	0
Isca2	19	0	0	0	0	0	0
Ly6c1	0	0	3	0	0	0	0
Lrrc26	7	0	0	0	0	0	0
Tmem134	17	0	0	0	0	0	0
1700015E13Rik	0	0	0	0	3	0	0
Cep192	3	0	0	0	0	0	0
Exosc5	3	2	0	0	0	0	0
Rpl41	11	0	0	0	0	0	0
Map3k14	23	0	0	0	0	0	0
Suv420h2	1	0	0	0	0	0	0
Igsf10	3	0	0	0	0	0	0
1110017F19Rik	1	0	0	0	0	0	0
Top2a	0	0	2	0	0	0	0
Cog4	14	6	0	0	0	0	0
Opalin	1	0	0	0	0	0	0
Sowahb	22	0	0	0	0	0	0
Ddr1	57	0	0	0	0	0	0
Cd37	0	0	6	0	0	0	0
Chst14	0	0	3	0	0	0	0
Mir2861	3	0	0	0	0	0	0
Alkbh4	1	0	0	0	0	0	0
Pkp4	0	0	1	0	0	0	0
Cep250	5	7	0	0	0	0	0
Gm13999	1	0	0	0	0	0	0
Atp6v0d1	4	0	0	0	0	0	0
Dusp5	1	0	0	0	0	0	0
Fam53a	0	6	0	0	0	0	0
Zwilch	7	0	0	0	0	0	0
Aldh3a2	1	0	0	0	0	0	0
Exd1	0	0	3	0	0	0	0
Sh2d4b	1	0	0	0	0	0	0
Usp25	0	0	0	0	0	0	4
Gm15754	14	0	0	0	0	0	0
Usp27x	0	1	0	0	0	0	0
Mysm1	1	0	0	0	0	0	0
Hexim2	10	0	0	0	0	0	0
Gas6	0	10	0	0	0	0	0
Gm11545	2	0	0	0	0	0	0
Bahd1	0	0	2	0	0	0	0
Slc19a1	21	0	0	0	0	0	0
Cul9	0	1	0	0	1	0	0
Fiz1	1	0	0	0	0	0	0
Gm17550	2	0	0	0	0	0	0
Theg	0	0	4	0	0	0	0
Thbs3	1	3	0	0	0	0	0
Nfib	2	0	0	0	0	0	0
Apoc2	0	1	0	0	0	0	0
Dmrta1	2	0	0	0	0	0	0
Pa2g4	8	0	0	0	0	0	0
Lrp6	2	3	0	0	0	0	0
Art2b	0	0	5	0	0	0	0
Ankrd13d	23	0	0	0	0	0	0
Gm16046	1	0	0	0	0	0	0
Znhit1	0	0	0	0	0	0	1
Gm17358	0	1	0	0	0	0	0
Gfod2	2	0	0	0	0	0	0
Tmem147	1	0	0	0	0	0	0
Cdkn2c	2	0	0	0	0	0	0
Atxn3	3	0	0	0	0	0	0
Tmco3	0	7	0	0	0	0	0
1110012J17Rik	13	0	0	0	0	0	0
Prelid1	2	0	0	0	0	0	0
Prm1	0	0	1	0	0	0	0
Eif4g1	7	0	0	0	0	0	0
1700028J19Rik	0	0	3	0	0	0	0
Zmynd17	1	0	0	0	0	0	0
Gm16140	0	1	0	0	0	0	0
Mllt1	3	0	0	0	0	0	0
2310030N02Rik	0	0	0	0	0	0	4
Gm13844	0	0	0	0	0	0	2
Gm17552	4	0	0	0	0	0	0
AC121954.1	0	2	0	0	0	0	0
Plbd1	6	0	0	0	0	0	0
AI428936	3	0	0	0	0	0	0
Iars2	0	6	0	0	0	0	0
Dak	13	7	0	0	0	0	0
Gm16517	0	0	15	0	0	0	0
Gm6659	2	0	0	0	0	0	0
Tmem198b	14	0	0	0	0	0	0
Tmed1	0	0	1	0	0	0	0
2200002K05Rik	13	0	0	0	0	0	0
Sesn1	3	0	0	0	0	0	0
1700063H04Rik	1	0	0	0	0	0	0
Cyp8b1	0	0	0	0	0	0	2
Atp4b	0	2	0	0	0	0	0
Trmu	0	14	0	0	0	0	0
Gm8330	5	0	0	0	0	0	0
Il1b	4	0	0	0	0	0	0
Gm10497	0	1	0	0	0	0	0
Gm15760	8	0	0	0	0	0	0
Ypel2	11	0	0	0	0	0	0
Rbm14	11	0	0	0	0	0	0
Gm20530	1	0	0	0	0	0	0
BC049352	2	0	0	0	0	0	0
Fcer1g	7	0	2	0	0	0	0
Mier2	0	0	13	0	0	0	0
Gm11011	1	0	0	0	0	0	0
Ankrd12	8	0	0	0	0	0	0
Accn5	2	0	0	0	0	0	0
A430078G23Rik	2	0	0	0	0	0	0
Clvs1	1	0	0	0	0	0	4
Lrrc10b	11	7	0	0	0	0	0
Insl6	4	0	0	0	0	0	0
Ddr2	0	0	0	0	5	0	0
Gm13066	6	0	0	0	0	0	4
Znfx1	5	2	0	0	0	0	0
Zfp516	0	1	0	0	0	0	0
Usp28	20	0	6	0	0	0	0
SNORA48	2	0	0	0	0	0	1
Arpp19	35	0	0	0	0	0	0
Rrp36	0	0	0	0	1	0	0
Mrps18a	7	2	0	0	1	0	0
Gm16621	2	2	0	0	0	0	0
Wbscr22	3	0	0	0	0	0	0
Tmem216	9	5	0	0	0	0	0
Mtss1l	14	6	0	0	0	0	0
Rad1	4	1	0	0	0	0	0
Smyd2	11	0	0	0	0	0	0
AW555464	36	0	0	0	0	0	0
Nrg1	1	3	0	0	0	0	0
Hdac7	2	0	0	0	0	0	0
Fam102b	0	17	0	0	0	0	0
Map3k1	10	0	0	0	0	0	0
Dbnl	0	0	6	0	0	0	0
Il10ra	5	0	0	0	0	0	0
Stk11	0	0	2	0	0	0	0
Lefty1	7	0	0	0	0	0	5
Gabarapl1	5	0	0	0	0	0	0
Ndufv1	15	0	0	0	0	0	0
Wdr53	6	0	0	0	0	0	0
Gm15323	1	0	0	0	0	0	0
Hoxc6	0	0	1	0	0	0	0
Icosl	2	0	0	0	0	0	0
Gm13584	1	0	0	0	0	0	0
Ung	9	0	9	0	0	0	0
Ndfip1	24	0	0	0	0	0	0
Ap3b1	9	0	0	0	0	0	0
Elmo3	4	0	0	0	0	0	0
Rsrc2	0	0	15	0	0	0	0
Fbxl6	11	0	8	0	0	0	0
Dqx1	6	0	0	0	0	0	0
4930542C16Rik	0	0	0	0	0	1	0
Myeov2	2	0	0	0	0	0	0
Gm16317	0	1	0	0	0	0	0
Slc22a7	0	1	0	0	1	0	0
Gm6034	4	0	0	0	0	0	0
Maml3	1	0	0	0	0	0	0
Mrpl53	4	0	0	0	0	0	0
Zfp488	0	0	1	0	0	0	0
Mgp	6	0	0	0	0	0	0
Cep170	10	0	0	0	0	0	0
Gm15573	1	0	0	0	0	0	0
Gdf11	14	0	0	0	0	0	0
Ppm1g	1	2	0	0	0	0	0
Arf1	0	1	0	0	0	0	0
Bcl7b	5	0	0	0	0	0	0
Nnat	12	0	0	0	0	0	4
Rxfp4	5	31	0	0	0	0	0
Gm11648	6	0	0	0	0	0	0
F2	1	0	0	0	0	0	0
Arhgef26	0	0	0	0	1	0	0
1700023C21Rik	1	0	0	0	0	0	0
Vps37d	7	0	0	0	0	0	0
Serpine1	0	0	0	0	0	0	1
1700069L16Rik	1	0	0	0	0	0	0
Rpl19	0	0	3	0	0	0	0
Otud7b	13	0	0	0	0	0	0
Tmem20	6	0	0	0	0	0	0
Dnd1	14	0	0	0	0	0	0
4932443I19Rik	0	2	0	0	0	0	0
Btf3	8	0	0	0	0	0	0
Phgdh	1	0	0	0	0	0	0
Plch2	0	0	0	0	1	0	0
Naaa	1	0	0	0	0	0	0
Ift122	1	0	0	0	0	0	0
Catsperg1	0	0	0	0	0	0	2
Fancc	0	0	0	0	0	0	10
Gm16596	1	0	0	0	0	0	0
4930481A15Rik	3	0	0	0	0	0	0
2500004C02Rik	1	0	0	0	0	0	0
Sdhaf1	4	0	0	0	0	0	0
Tomm34	1	0	0	0	0	0	0
SNORA57	4	2	0	0	0	0	0
Edem2	9	7	0	0	0	0	0
Tnfsf14	5	0	0	0	0	0	0
Sphk2	0	0	7	0	0	0	0
Ripk4	3	0	0	0	0	0	0
Spg11	8	0	0	0	0	0	0
Prrx2	18	0	0	0	0	0	0
Kif16b	1	0	0	0	0	0	0
Dgka	4	0	0	0	0	0	0
Pkp3	1	0	0	0	0	0	0
Nphp4	0	2	0	0	0	0	2
Sdcbp2	2	0	0	0	0	0	0
Cdkn1b	0	4	0	0	0	0	0
Gucy1a3	0	1	0	0	0	0	0
Pex7	4	1	0	0	0	0	0
Tfrc	10	0	0	0	0	0	0
Mir145	1	0	0	0	0	0	0
4930599N23Rik	1	0	0	0	0	0	0
Snx14	16	0	0	0	0	0	0
Cpne1	4	4	0	0	0	0	0
Pwp2	4	0	0	0	0	0	0
Zfp64	5	0	15	0	0	0	0
Cd24a	0	0	0	0	2	0	0
Kalrn	0	1	0	0	0	0	0
Odf1	1	0	0	0	0	0	0
Sdhaf2	20	9	0	0	0	0	0
1700110K17Rik	0	0	7	0	0	0	0
Gm6169	1	0	0	0	0	0	0
4933406J08Rik	2	0	0	0	0	0	0
Ets2	29	0	0	0	0	0	0
Xpnpep1	2	0	0	0	0	0	0
A730081D07Rik	1	0	0	0	0	0	0
Col6a1	1	0	0	0	0	0	0
Pan3	0	1	0	0	0	0	0
Pcyt2	2	0	0	0	0	0	0
Nphs1	2	0	0	0	0	0	0
Gm11953	2	0	0	0	0	0	0
Msl2	1	0	0	0	0	0	0
Cxcr4	28	0	0	0	0	0	0
Ptcd3	3	1	0	0	0	0	0
Pick1	0	3	0	0	0	0	0
Gm11427	5	0	0	0	0	0	0
Helz	2	0	0	0	0	0	0
Ggt1	2	0	0	0	0	0	0
Panx1	27	0	0	0	0	0	0
Gpr55	2	0	0	0	0	0	0
Gm10638	11	0	0	0	0	0	0
1190005F20Rik	0	0	0	0	0	0	1
Gm5777	0	0	0	0	0	0	1
Cyp4f40	0	0	0	0	0	0	1
Mns1	3	0	0	0	0	0	0
Slc41a3	0	19	0	0	0	0	0
Slc16a8	0	3	0	0	0	0	0
Dusp16	0	4	0	0	0	0	0
1110018G07Rik	20	1	0	0	0	0	0
Gm8369	4	0	7	0	0	0	0
1810055G02Rik	1	0	0	0	0	0	0
Thap3	0	1	0	0	1	0	4
Gm14231	4	0	0	0	0	0	0
E130303B06Rik	2	0	0	0	0	0	0
Gm12693	1	0	0	0	0	0	0
Dhrs9	3	0	0	0	0	0	0
Fam102a	9	0	0	0	0	0	0
Atoh8	6	5	0	0	0	0	0
Insr	3	0	0	0	0	0	0
Nsmce1	12	0	0	0	0	0	0
Tcf7l2	5	0	0	0	0	0	0
Recql4	10	0	7	0	0	0	0
Mogs	4	0	0	0	0	0	0
Iqck	0	4	0	0	0	0	0
Gm3571	0	1	0	0	0	0	0
Hist2h3c1	13	0	0	0	0	0	0
Med1	0	0	2	0	0	0	0
Gm17375	0	2	0	0	0	0	0
Mc5r	2	0	0	0	0	0	0
Pih1d1	0	0	1	0	0	0	0
Rpl23	0	0	2	0	0	0	0
7SK	9	4	0	0	0	1	0
Rab17	0	0	1	0	0	0	0
Vault	3	0	0	0	0	0	0
Slk	11	0	0	0	0	0	0
A930007I19Rik	1	0	0	0	0	0	0
Fbxo31	6	0	0	0	0	0	0
Fbln5	4	0	0	0	0	0	0
1200011M11Rik	10	0	0	0	0	0	0
Ppp1ca	28	0	0	0	0	0	0
Fam49b	4	0	0	0	0	0	0
Mrpl11	2	0	0	0	0	0	0
Mdn1	8	0	0	0	0	0	0
Lipg	4	0	0	0	0	0	0
Tm9sf3	6	0	0	0	0	0	0
2310007B03Rik	3	0	0	0	0	0	0
Yes1	4	0	0	0	0	0	0
Cct6b	0	0	0	0	0	0	2
Gp1bb	9	0	0	0	0	0	0
Grk4	0	0	0	0	1	0	0
Klf9	0	0	0	0	0	0	6
Snx21	1	4	0	0	0	0	0
Crhr1	4	0	0	0	0	0	0
Psmf1	11	0	0	0	0	0	0
Ppm1n	0	7	0	0	0	0	0
Dhx32	5	0	0	0	0	0	0
Med21	4	0	0	0	0	0	0
Ch25h	2	0	0	0	0	0	0
Alg3	7	0	0	0	0	0	0
9930021J03Rik	2	0	0	0	0	0	0
Sla2	1	0	0	0	0	0	0
Cstb	2	0	0	0	0	0	0
Mfsd2b	2	0	0	0	0	0	0
Slc25a19	9	0	0	0	0	0	0
Sh3tc2	7	0	0	0	0	0	0
1190002N15Rik	0	0	0	0	2	0	0
Ctss	1	0	0	0	0	0	0
Gm98	23	8	0	0	0	0	0
Gm9855	2	0	0	0	0	0	0
Gm15396	0	0	2	0	0	0	0
Gm13445	18	0	0	0	0	0	0
H3f3a	1	0	0	0	0	0	5
Psd3	4	0	0	0	0	0	0
9030425E11Rik	1	0	4	0	0	0	0
Gm14320	0	1	0	0	0	0	0
Gm12918	0	0	0	0	0	0	1
Atp5e	5	0	0	0	0	0	0
SNORD83	2	0	0	0	0	0	0
Dhx9	1	0	0	0	0	0	0
Gm17528	2	0	0	0	0	0	0
Gm2245	3	0	0	0	0	0	0
Btnl10	0	2	0	0	0	0	0
Gm8705	1	0	0	0	0	0	0
Gm13614	3	0	0	0	0	0	0
Zdhhc7	2	0	0	0	0	0	0
Tmem119	17	0	0	0	0	0	0
Vti1b	2	0	0	0	0	0	0
Ap2b1	7	0	0	0	0	0	0
Cd3eap	0	11	0	0	0	0	0
Mrps18b	47	0	0	0	0	0	0
Hist1h4i	2	0	0	0	0	0	0
Gm6316	1	0	0	0	0	0	0
Tmem91	2	2	0	0	0	0	0
Rap1a	2	0	0	0	0	0	0
Cnpy2	4	0	0	0	0	0	0
Trappc2l	0	2	0	0	0	0	0
Gstt1	1	0	0	0	0	0	0
Tmem184c	9	0	0	0	0	0	0
0610012G03Rik	1	0	0	0	0	0	0
Gm12750	1	0	0	0	0	0	0
Mak	1	0	0	0	0	0	0
Gm15444	4	0	0	0	0	0	0
Bax	0	0	7	0	0	0	0
Midn	0	0	2	0	0	0	0
Mypop	9	0	0	0	0	0	0
Dynll2	0	0	0	0	1	0	0
Gm4893	0	0	1	0	0	0	0
Ms4a6c	4	0	5	0	0	0	0
Ppp3cb	3	0	0	0	0	0	0
Trib1	7	0	0	0	0	0	0
Cd3d	5	0	0	0	0	0	0
Vapb	1	0	0	0	0	0	0
Aagab	29	0	0	0	0	0	0
Pigl	1	0	0	0	0	0	0
Spib	0	0	1	0	0	0	0
Tppp3	4	0	0	0	0	0	0
Traf5	12	12	0	0	0	0	0
Gm13998	1	0	0	0	0	0	0
Clrn1	1	0	0	0	0	0	0
Apoa1bp	4	7	0	0	0	0	0
Mir5111	1	0	0	0	0	0	0
Rps20	2	0	0	0	0	0	0
Dolpp1	9	0	0	0	0	0	0
Gcnt2	5	0	0	0	0	0	0
Rpl27	3	1	1	0	0	0	0
4933400C05Rik	3	0	0	0	0	0	0
Fam53b	0	3	0	0	0	0	0
Clock	0	1	0	0	0	0	0
Klrc1	1	0	0	0	0	0	0
Elof1	0	0	10	0	0	0	0
Cldn3	6	0	0	0	0	0	0
Chchd5	2	0	0	0	0	0	0
Tnfrsf14	0	0	0	0	3	0	0
Stbd1	5	0	0	0	0	0	0
Ggt7	3	5	0	0	0	0	0
Tmem138	17	6	0	0	0	0	0
Pcnxl3	12	0	0	0	0	0	0
Tm9sf4	2	0	2	0	0	0	0
Gm10032	4	0	0	0	0	0	0
Zc3hav1	1	0	0	0	0	0	0
Nfkbib	0	0	0	0	0	0	4
Ppp1r32	3	0	0	0	0	0	0
Gm13611	1	0	0	0	0	0	0
Gm10059	0	1	0	0	0	0	0
4930545L23Rik	1	0	0	0	0	0	0
BC048609	1	0	0	0	0	0	0
Polrmt	0	0	15	0	0	0	0
Rap1b	1	0	0	0	0	0	0
Gm20392	1	0	0	0	0	0	0
Ccdc121	1	0	0	0	0	0	0
Matn4	1	0	0	0	0	0	0
Mthfsd	9	0	0	0	0	0	0
Gba	1	2	0	0	0	0	0
1700012B09Rik	1	0	0	0	0	0	0
Ctnnd1	3	0	0	0	0	0	0
Crebl2	0	4	0	0	0	0	0
Gm16764	0	1	0	0	0	0	0
Aldh1l1	0	13	0	0	0	0	0
Gm14167	1	0	0	0	0	0	0
Tcf7l1	10	7	0	0	0	0	0
Gm16353	18	0	0	0	0	0	0
Zscan20	0	0	1	0	0	0	0
Acacb	2	0	9	0	0	0	0
Stx16	2	0	0	0	0	0	0
Gm6484	0	0	1	0	0	0	0
Dnajc9	4	0	0	0	0	0	0
Mrrf	3	0	0	0	0	0	0
Nlrp6	1	0	0	0	0	0	0
Gon4l	11	28	0	0	0	0	0
BC057079	7	0	0	0	0	0	0
Cdr2	3	0	0	0	0	0	0
Deb1	1	0	0	0	0	0	2
Aldh3b1	1	0	0	0	0	0	0
Ormdl3	0	0	1	0	0	0	0
E030024N20Rik	0	0	0	0	0	0	1
Gm15431	5	0	4	0	0	0	0
Cdc42	6	5	0	0	0	0	0
Opa3	3	10	0	0	0	0	0
Rassf10	1	0	0	0	0	0	0
Gm6293	5	0	0	0	0	0	0
Dlgap5	1	0	0	0	0	0	0
Zmat2	14	0	0	0	0	0	0
Mcts2	0	0	2	0	0	0	0
Rab22a	9	1	0	0	0	0	0
Zfp653	0	0	7	0	0	0	0
Muc4	1	0	0	0	0	0	0
Gpr84	0	0	10	0	0	0	0
Gm14261	0	0	3	0	0	0	0
Csnk1a1	5	0	0	0	0	0	0
Napsa	0	0	2	0	0	0	0
4931403M11Rik	0	0	0	0	0	1	0
Crip1	26	0	0	0	0	0	0
Gm8731	0	10	11	0	0	0	0
Angptl3	1	0	0	0	0	0	0
Ppp1r2	5	0	0	0	0	0	0
Hexim1	16	0	0	0	0	0	0
Sh3glb2	2	0	0	0	0	0	0
Susd2	2	0	0	0	0	0	0
Zfp280d	6	0	0	0	0	0	0
Abcb9	0	0	9	0	0	0	0
Foxo3	5	0	0	0	0	0	0
Bckdha	2	2	0	0	0	0	0
Cdkl1	2	0	0	0	0	0	0
Pttg1	4	0	0	0	0	0	0
Gm10941	19	0	0	0	0	0	0
Rrp1	2	0	0	0	0	0	0
9230116N13Rik	0	0	1	0	1	0	0
Stx11	2	0	0	0	0	0	0
Mir5109	5	0	0	0	0	0	0
Rpn2	8	0	0	0	0	0	0
Commd5	9	0	6	0	0	0	0
Gm13072	12	0	0	0	0	0	6
Gm15599	0	0	0	0	1	0	0
Tm4sf1	2	0	0	0	0	0	0
Cchcr1	33	0	0	0	0	0	0
Mtmr2	2	3	0	0	0	0	0
Gm5464	5	0	0	0	0	0	0
Eme1	4	0	0	0	0	0	0
4930443B20Rik	1	0	0	0	0	0	0
Pde6d	5	0	0	0	0	0	0
Hdgf	1	4	0	0	0	0	0
Slmo2	2	0	0	0	0	0	0
Spnb3	7	0	0	0	0	0	0
Mir3960	3	0	0	0	0	0	0
Gm17022	0	1	0	0	0	0	0
Zfp831	1	0	0	0	0	0	0
Prpf40a	3	0	0	0	0	0	0
Gm9613	6	0	0	0	0	0	0
Pola2	9	0	0	0	0	0	0
Tmem212	1	0	0	0	0	0	0
Gm16382	2	0	0	0	0	0	0
Ints10	1	0	0	0	0	0	0
Gm16908	3	0	0	0	0	0	0
Nufip1	1	0	0	0	0	0	0
Gm15656	1	0	0	0	0	0	0
Gm9506	0	0	0	0	0	0	1
Cs	4	0	0	0	0	0	0
Foxf1a	6	0	0	0	0	0	0
Hipk2	3	0	0	0	0	0	0
2310010M20Rik	3	0	0	0	0	0	0
Ermp1	4	0	0	0	0	0	0
Psenen	2	0	0	0	0	0	0
Klraq1	0	3	0	0	0	0	0
Abcf1	32	0	0	0	0	0	0
4933427E11Rik	0	0	4	0	0	0	0
Gm20536	7	5	0	0	0	0	0
Paf1	0	0	0	0	0	0	1
Pcif1	3	4	0	0	0	0	0
E030013I19Rik	1	0	0	0	0	0	0
Add1	0	0	0	0	1	0	0
Cmtm6	0	1	0	0	2	0	0
Gm12304	2	0	0	0	0	0	0
Tfap2a	3	0	0	0	0	0	0
Snx3	3	0	0	0	1	0	0
Tmem54	0	0	1	0	0	0	0
Ppia	0	0	1	0	0	0	0
Dvl3	9	0	0	0	0	0	0
Ttll5	0	1	0	0	0	0	0
Gm10382	5	0	0	0	0	7	0
Upk1a	1	0	0	0	0	0	0
Sox12	1	0	0	0	0	0	0
Kirrel2	1	0	0	0	0	0	0
Tmod2	2	0	0	0	0	0	0
Dnm1	6	0	0	0	0	0	0
Pex11b	1	0	0	0	0	0	0
Pomt1	4	0	0	0	0	0	0
Gm15402	3	2	0	0	0	0	0
Nsmce2	2	0	0	0	0	0	0
2310039H08Rik	0	0	0	0	1	0	0
Gm16279	8	0	0	0	0	0	0
Spire2	0	4	0	0	0	0	0
Ggn	0	0	0	0	0	0	3
Wfdc6b	0	1	0	0	0	0	0
Ccdc122	2	0	0	0	0	0	0
Rap1gap	13	7	0	0	0	0	0
Ntn5	0	0	1	0	0	0	0
Lbx2	2	0	0	0	0	0	0
4833439L19Rik	0	1	0	0	0	0	0
Pfn2	2	0	0	0	0	0	0
Slc25a33	53	0	0	0	0	0	2
Nfkbiz	12	0	0	0	0	0	0
Armc9	12	0	0	0	0	0	0
Tnfrsf1a	1	0	0	0	0	0	0
Atf4	23	0	0	0	0	0	0
Abcf3	12	0	0	0	0	0	0
Gm14088	0	0	2	0	0	0	0
Ctbp2	0	1	0	0	0	0	0
Lzic	21	0	0	0	0	0	7
Nosip	0	0	2	0	0	0	0
Itga8	4	0	0	0	0	0	0
Coq7	0	1	0	0	0	0	0
Gm8835	1	0	0	0	0	0	0
Zfp335	0	4	0	0	0	0	0
Gm19357	3	0	0	0	0	0	0
Gpr1	1	0	0	0	0	0	0
Lynx1	0	0	6	0	0	0	0
Gm10516	3	3	0	0	0	0	0
Ict1	2	0	0	0	0	0	0
Gm10818	1	0	0	0	0	0	0
Dmwd	8	4	0	0	0	0	0
Wfdc6a	1	1	0	0	0	0	0
Pitpnb	2	0	0	0	0	0	0
Psen2	1	0	0	0	0	0	0
Gm11345	0	0	1	0	0	0	0
Wdr31	23	0	0	0	0	0	0
Cd84	9	0	3	0	0	0	0
Gm11632	0	0	1	0	0	0	0
Car12	3	0	0	0	0	0	0
Mamstr	0	0	3	0	0	0	0
Adrb2	19	0	0	0	0	0	0
Itga7	18	0	0	0	0	0	0
Epha4	0	0	0	0	1	0	0
Rint1	0	0	0	0	0	1	0
Tmem223	1	0	0	0	0	0	0
Map2k1	2	0	0	0	0	0	0
Gm13065	2	0	0	0	0	0	0
Ormdl2	8	0	0	0	0	0	0
Scarna17	2	0	0	0	0	0	0
Whsc2	0	2	0	0	0	0	0
Cds1	0	0	2	0	0	0	0
Alad	29	0	0	0	0	0	0
Atxn10	0	1	0	0	0	0	0
Kcnv1	1	0	0	0	0	0	0
Ddx6	1	0	0	0	0	0	0
Cdc26	19	0	0	0	0	0	0
Gnaz	1	0	0	0	0	0	0
Tcof1	0	7	14	0	0	0	0
Gm16314	5	0	0	0	0	0	0
Rpl22	0	9	0	0	0	0	6
Cat	2	0	0	0	0	0	0
Zfp28	0	0	0	0	0	0	8
Ift46	5	0	0	0	0	0	0
Prkd1	0	0	0	0	1	0	0
Angel2	4	0	0	0	0	0	0
Usp39	15	8	0	0	0	0	0
Klk1b24	0	0	2	0	0	0	0
D030025P21Rik	10	0	0	0	0	0	0
Apobec1	3	0	0	0	0	0	0
Prmt3	15	0	0	0	0	0	0
Gm16175	0	1	0	0	0	0	0
Arl8a	1	0	0	0	0	0	0
Gm4485	1	0	0	0	0	0	0
AC044864.1	2	4	0	0	0	0	0
Acp5	0	0	11	0	0	0	0
Maf	0	1	0	0	0	0	0
Mfsd7b	1	0	0	0	0	0	0
Pkhd1l1	1	0	0	0	0	0	0
Idh3b	2	0	0	0	0	0	0
B230208H17Rik	12	0	0	0	0	0	0
Gm14253	5	0	0	0	0	0	0
Gm11827	0	0	0	0	0	0	1
Ablim3	6	0	0	0	0	0	0
Cd200r3	3	0	0	0	0	0	0
Polr2m	8	0	0	0	0	0	0
Ubxn2a	4	0	0	0	0	0	0
SNORA18	1	0	0	0	0	0	0
Smg7	1	0	0	0	0	0	0
Arvcf	7	0	0	0	0	0	0
Apc	0	2	0	0	0	0	0
Med16	0	0	11	0	0	0	0
SCARNA15	6	16	0	0	0	0	0
AI182371	2	0	0	0	1	0	0
Plcd3	5	0	0	0	0	0	0
Cacna1f	0	1	0	0	0	0	0
Cyp11b2	0	0	4	0	0	0	0
Gm13413	4	0	0	0	0	0	0
Hadha	0	3	0	0	0	0	0
Edf1	12	0	0	0	0	0	0
Sh3pxd2a	14	0	0	0	0	0	0
Gm11479	1	0	0	0	0	0	0
Scx	8	0	8	0	0	0	0
Xpc	16	0	0	0	0	0	0
Ctdspl	1	0	0	0	0	0	0
Grap	1	0	0	0	0	0	0
Ebf2	4	0	0	0	0	0	0
Tlx2	2	0	0	0	0	0	0
Ovol1	4	0	0	0	0	0	0
Zfp526	1	0	0	0	0	0	0
Fam185a	10	0	0	0	0	0	0
Clic1	2	0	0	0	0	0	0
Supt4h1	0	0	0	0	1	0	0
Slc4a1ap	4	9	0	0	0	0	0
Sec63	0	0	0	0	5	0	0
Arhgap30	10	0	4	0	0	0	0
Pga5	1	1	0	0	0	0	0
Usp43	10	0	0	0	0	0	0
Ssbp2	0	0	2	0	0	0	0
Large	5	0	0	0	0	0	0
Nfrkb	4	0	0	0	0	0	0
Nol3	4	0	0	0	0	0	0
Rprd1b	1	0	0	0	0	0	4
Gm12646	1	0	0	0	0	0	0
Ykt6	0	0	5	0	0	0	0
Gsk3a	1	0	0	0	0	0	0
Kif21b	3	0	0	0	0	0	0
Gm11933	1	0	0	0	0	0	0
Snord35b	0	0	2	0	0	0	0
Gnb4	0	0	12	0	0	0	0
1700086P04Rik	0	0	1	0	0	0	0
Mertk	5	0	0	0	0	0	0
1700086O06Rik	6	0	0	0	0	0	0
Cdca4	36	0	0	0	0	0	0
Ly6f	0	0	2	0	0	0	0
Traf1	2	0	0	0	1	0	0
Gm11344	0	0	2	0	0	0	0
Rnf141	2	0	0	0	0	0	0
Ttll11	1	0	0	0	0	0	0
Sf3b3	14	6	0	0	0	0	0
Wdr26	21	0	0	0	0	0	2
Mlana	2	0	0	0	0	0	0
Cdk12	0	0	2	0	0	0	0
Plekhf2	0	0	0	0	0	0	7
Lasp1	0	0	2	0	0	0	0
Oprd1	0	0	0	0	0	0	2
Carkd	0	0	2	0	0	0	0
Ubash3b	1	0	0	0	0	0	0
Gm10863	0	2	0	0	0	0	0
Ganc	4	0	0	0	0	0	0
A630055G03Rik	0	0	1	0	0	0	0
Rpl23a	1	0	0	0	0	0	0
Tmem149	2	0	0	0	0	0	0
Ckap4	9	0	0	0	0	0	0
Slc25a17	3	0	2	0	0	0	0
Ndufv3	16	0	0	0	0	0	0
Rab1b	2	0	0	0	0	0	0
Dpy19l4	0	0	0	0	0	0	5
Bclaf1	1	0	0	0	0	0	0
Zfp296	0	12	0	0	0	0	0
AI314976	6	0	0	0	0	0	0
Gm15419	0	0	2	0	0	0	0
Gm11704	1	0	0	0	0	0	0
D630008O14Rik	1	0	0	0	0	0	0
Stxbp3a	0	21	0	0	0	0	0
Ikzf3	0	0	1	0	0	0	0
Polr2f	0	3	0	0	0	0	0
Coro1c	23	0	5	0	0	0	0
Arhgef18	3	0	0	0	0	0	0
Gm4342	0	10	0	0	0	0	0
Gm9887	11	0	0	0	0	0	0
Emr1	7	0	0	0	0	0	0
Iglc3	1	0	0	0	0	0	0
Pspn	5	0	0	0	0	0	0
Prkar1a	3	0	0	0	0	0	0
Cplx2	2	6	0	0	0	0	0
Dhx40	14	0	0	0	0	0	0
Phc2	0	0	3	0	0	0	0
Gm11032	3	0	0	0	0	0	0
Bloc1s3	0	10	0	0	0	0	0
Ednrb	10	0	0	0	0	0	0
Gal3st1	3	0	0	0	0	0	0
Nod1	4	0	0	0	0	0	0
Spc24	0	0	2	0	0	0	0
Lrmp	0	0	0	0	0	0	5
Cnfn	1	0	0	0	0	0	0
Chrd	4	0	0	0	0	0	0
Antxr1	1	0	0	0	0	0	0
C530050E15Rik	0	0	1	0	0	0	0
SNORD56	1	0	0	0	0	0	0
Mpzl2	4	0	0	0	0	0	0
Ptbp1	0	0	11	0	0	0	0
Parva	13	0	0	0	0	0	0
Pofut1	4	0	2	0	0	0	0
Rab4a	0	10	0	0	0	0	0
Gm17098	1	0	0	0	0	0	0
Mrps35	8	0	0	0	0	0	0
Gm17122	4	0	2	0	0	0	0
Cep97	10	0	0	0	0	0	0
Rhbdd2	3	0	0	0	0	0	0
Guk1	0	2	0	0	0	0	0
Lyz1	3	0	0	0	0	0	0
Slurp1	0	0	4	0	0	0	0
Ttc4	2	1	0	0	0	0	0
Oxt	1	0	0	0	0	0	0
Ndufs2	6	0	0	0	0	0	0
Dgcr6	3	0	0	0	0	0	0
Usp21	6	0	0	0	0	0	0
Klhl5	5	0	0	0	0	0	0
U2af2	1	0	0	0	0	0	0
Larp1b	3	0	0	0	0	0	0
Bin3	1	0	0	0	2	0	0
Vmn1r	0	0	0	0	0	0	2
Mmp2	1	0	0	0	0	0	0
Bcl6	7	0	0	0	0	0	0
Gm16989	1	0	0	0	0	0	0
I830012O16Rik	1	0	0	0	0	0	0
Mif4gd	8	0	0	0	0	0	0
2810459M11Rik	2	0	0	0	0	0	0
8430419K02Rik	0	1	0	0	0	0	0
Mrps24	0	0	7	0	0	0	0
Gm4482	1	0	0	0	0	0	0
Hist1h4k	2	0	0	0	0	0	0
Tshz2	10	0	0	0	0	0	3
Zfp828	0	6	0	0	0	0	0
Cldn4	8	0	0	0	0	0	0
Fndc8	0	0	0	0	0	0	3
Hsd17b7	0	0	0	0	5	0	0
Tc2n	2	0	0	0	0	0	0
Kcnk6	0	0	0	0	0	0	1
Gm15613	3	0	0	0	0	0	0
Gm4204	1	0	0	0	0	0	0
Ccdc138	0	0	0	0	0	0	1
Sik1	8	0	0	0	0	0	0
Sirpa	9	0	0	0	0	0	0
Gm13433	9	0	0	0	0	0	0
Baalc	1	0	0	0	0	0	0
Cdc42bpa	2	0	0	0	0	0	0
Gm12744	1	0	0	0	0	0	0
Ctsa	1	4	0	0	0	0	0
Gm11361	1	0	0	0	0	0	0
Scarna2	0	1	0	0	0	0	0
Cd28	6	0	0	0	0	0	0
Unc93b1	5	0	0	0	0	0	0
Gm14454	7	2	0	0	0	0	0
Kcnk7	13	0	0	0	0	0	0
Gad1	3	0	0	0	0	0	0
Golga4	1	0	0	0	0	0	0
Ubc	4	0	0	0	0	6	0
Gm11641	7	0	0	0	0	0	0
Pold2	0	0	7	0	0	0	0
Polh	0	0	0	0	1	0	0
9230106D20Rik	1	1	0	0	0	0	0
AC160471.1	0	1	0	0	0	0	0
Gm15605	1	0	0	0	0	0	0
Uhmk1	0	0	0	0	5	0	0
Tigd4	16	0	0	0	0	0	0
4931428F04Rik	3	0	0	0	0	0	0
Mul1	0	1	0	0	0	0	0
Vipr1	1	0	0	0	0	0	2
Plod3	0	0	0	0	0	0	1
Wdr47	0	3	0	0	0	0	0
Tatdn3	3	0	0	0	0	0	0
Csnk1e	0	2	0	0	0	0	0
Oplah	5	0	3	0	0	0	0
Gm13347	1	0	0	0	0	0	0
Klf6	22	0	0	0	0	0	0
Mavs	5	0	0	0	0	0	0
Lgals1	0	3	0	0	0	0	0
Chchd4	17	0	0	0	0	0	1
Sdr42e1	1	0	0	0	0	0	0
Rpl39l	2	0	0	0	0	0	0
St3gal5	4	1	0	0	0	0	0
Ptdss2	1	0	0	0	0	0	0
Rad51	0	0	2	0	0	0	0
Parl	12	0	0	0	0	0	0
4933433G15Rik	1	0	0	0	0	0	0
Usp54	1	0	0	0	0	0	0
Tmem41b	0	0	0	0	0	0	1
Tigd3	11	0	0	0	0	0	0
Cep110	10	0	0	0	2	0	0
Gm14573	1	0	0	0	0	0	0
Dhx29	0	0	1	0	0	0	0
Acot8	4	4	0	0	0	0	0
Ly86	0	0	0	0	3	0	0
Tmem201	48	0	0	0	0	0	3
Rpl21	3	7	0	0	0	0	2
Mll1	4	0	0	0	0	0	0
Gm12920	0	0	0	0	0	0	1
Cd14	13	0	0	0	0	0	0
Tmem141	10	0	0	0	0	0	0
Mgat4a	22	0	0	0	0	0	0
Lta	1	0	0	0	0	0	0
Nrip1	4	0	0	0	0	0	0
1110054M08Rik	2	0	0	0	0	0	0
Ehd1	1	0	0	0	0	0	0
Art4	2	0	0	0	0	0	0
Gpr108	11	0	0	0	0	0	0
Glb1	0	0	0	0	2	0	0
Ces1a	1	0	0	0	0	0	0
Osta	5	0	0	0	0	0	0
Aprt	0	2	0	0	0	0	0
Aicda	3	0	0	0	0	0	0
Col4a1	0	0	2	0	0	0	0
Trpc4ap	9	7	0	0	0	0	0
Polm	0	0	6	0	0	0	0
Hist1h4n	2	0	0	0	0	0	0
Alkbh7	8	0	0	0	0	0	0
Gm16312	2	0	0	0	0	0	0
1700021F05Rik	1	0	0	0	0	0	0
Mirlet7i	1	0	0	0	0	0	0
Sirt2	0	0	0	0	0	0	4
Gm20447	1	0	0	0	0	0	0
Iqub	2	0	0	0	0	0	0
Rpl38	0	1	0	0	0	0	0
Nrarp	8	0	0	0	0	0	0
Gm17443	0	1	0	0	0	0	0
Cdca7	0	0	0	0	1	0	0
Gm9765	0	0	1	0	0	0	0
Tmem210	6	0	0	0	0	0	0
Gpx8	0	0	2	0	0	0	0
Trim37	10	0	0	0	0	0	0
Akt1	36	0	0	0	0	0	0
Snord66	1	0	0	0	0	0	0
Trim39	3	0	0	0	0	0	0
Rhod	18	0	0	0	0	0	0
Smarcad1	12	0	0	0	0	0	0
D10Jhu81e	4	0	0	0	0	0	0
Cd274	4	0	0	0	0	0	0
SNORA1	2	0	0	0	0	0	0
Rdh12	1	0	0	0	0	0	0
Ppp2r5a	3	0	0	0	0	0	0
Gtf3c2	1	2	0	0	0	0	0
Amz2	2	0	0	0	0	0	0
Tssk3	0	0	1	0	0	0	0
Eif4g3	7	10	0	0	0	0	0
Foxk2	5	0	0	0	0	0	0
Cd74	0	13	16	0	0	0	0
AW047730	1	0	0	0	0	0	0
Gm9946	0	1	0	0	0	0	0
Gm15615	1	0	0	0	0	0	0
Rapgef4	0	0	0	0	2	0	0
Fat1	6	0	0	0	0	0	0
RP24	11	0	1	0	0	0	0
Gm5887	2	0	0	0	0	0	0
Magoh	3	0	0	0	0	0	0
Zyg11a	1	0	0	0	0	0	0
Nostrin	4	0	0	0	0	0	0
Gm15852	0	0	0	0	1	0	0
4930404H24Rik	1	0	0	0	0	0	0
Hsd17b14	0	0	4	0	0	0	0
Slc4a11	1	0	0	0	0	0	0
4930427A07Rik	5	0	0	0	0	0	0
Mrpl2	0	0	0	0	1	0	0
Gm14488	5	0	0	0	0	0	0
Gm5617	18	0	11	0	0	0	0
Sftpb	5	2	0	0	0	0	0
Arf6	15	0	0	0	0	0	0
Vps37b	0	0	15	0	0	0	0
Gm10435	0	1	0	0	0	0	0
Ddx19b	10	4	0	0	0	0	0
Tnip2	0	0	0	0	1	0	0
Zdhhc1	3	0	0	0	0	0	0
Slc50a1	1	2	0	0	0	0	0
Sftpc	4	0	0	0	2	0	0
Hmgn1	18	0	0	0	0	0	0
Pitpnc1	1	0	0	0	0	0	0
Gripap1	0	4	0	0	0	0	0
Slc48a1	3	0	0	0	0	0	0
Pmp22	6	0	0	0	0	0	0
Btbd16	1	0	0	0	0	0	0
Slc25a23	8	0	0	0	0	0	0
Nubp1	8	1	1	0	0	0	0
Rab5b	3	0	0	0	0	0	0
Card6	2	0	0	0	0	0	0
Icos	3	0	0	0	0	0	0
Gm12516	1	0	0	0	0	0	0
Fam89b	13	0	0	0	0	0	0
Gm20503	1	0	0	0	0	0	0
Bsg	0	0	16	0	0	0	0
Arhgef37	3	0	0	0	0	0	0
B9d1	2	0	0	0	0	0	0
1700088E04Rik	0	2	0	0	0	0	0
Dnttip1	4	4	0	0	0	0	0
Fbln7	3	0	0	0	0	0	0
Avpr1b	1	0	0	0	0	0	0
Dock10	1	0	0	0	0	0	0
Rbbp4	0	0	4	0	0	0	0
Ndufa5	2	0	0	0	0	0	0
Dgat1	11	0	8	0	0	0	0
Gm14163	0	0	1	0	0	0	0
Usf1	5	0	5	0	0	0	0
Cacnb1	0	0	2	0	0	0	0
Fscn3	4	0	0	0	0	0	0
BC048355	0	1	0	0	1	0	0
Man1a	12	0	0	0	0	0	0
Anapc1	5	0	0	0	0	0	0
Ankk1	0	0	1	0	0	0	0
Gm9985	2	0	0	0	0	0	0
Sh3bp2	0	0	0	0	1	0	0
Atp9a	11	0	18	0	0	0	0
Gm13096	0	0	0	0	0	0	1
Rps29	6	0	0	0	0	0	0
Zfp217	4	0	0	0	0	0	1
9130221H12Rik	1	0	0	0	0	0	0
AA543186	7	0	0	0	0	0	0
Snrpf	0	3	0	0	0	0	0
Uroc1	0	1	0	0	0	0	0
Prtn3	0	0	9	0	0	0	0
Scamp3	2	8	0	0	0	0	0
Gm19684	1	0	0	0	0	0	0
Tcn2	4	0	0	0	0	0	0
Wrb	3	0	0	0	0	0	0
Ndufa12	0	9	0	0	0	0	0
Fbxw5	4	0	0	0	0	0	0
Galnt4	4	0	0	0	0	0	0
Hdac6	0	3	0	0	0	0	0
Hars	15	0	0	0	0	0	0
Nenf	5	0	0	0	0	0	0
Zkscan4	2	0	0	0	0	0	0
Tmem167b	0	3	0	0	0	0	0
Mboat1	0	1	0	0	0	0	0
Copz1	0	0	8	0	0	0	0
Golga2	6	0	0	0	0	0	0
Pomp	0	1	0	0	0	0	0
Mettl7b	13	0	0	0	0	0	0
Tnfrsf11a	3	0	0	0	0	0	0
Gm15722	0	5	0	0	0	0	0
Mir100	2	0	0	0	0	0	0
Gpatch8	0	4	0	0	0	0	0
Mrps26	6	0	0	0	0	0	0
Dcxr	3	0	0	0	0	0	0
5430435G22Rik	1	0	0	0	0	0	0
Zfp637	0	2	0	0	0	0	0
E2f6	20	0	12	0	0	0	0
Gm5129	0	2	0	0	0	0	0
Fmnl2	4	0	0	0	0	0	0
Ppfibp2	0	1	0	0	0	0	0
Gm11965	0	0	1	0	0	0	0
Sdccag8	9	0	0	0	0	0	0
Gm16247	0	3	0	0	0	0	0
Gm15636	1	0	0	0	0	0	0
Brca2	0	0	1	0	0	0	0
Pik3cd	42	0	0	0	0	0	2
Slc6a5	1	0	0	0	0	0	0
Hnrpll	1	0	0	0	0	0	0
4933403F05Rik	5	0	0	0	0	0	0
Cdc25b	4	0	0	0	0	0	0
N4bp2l1	0	0	2	0	0	0	0
Tspan8	4	0	0	0	0	0	0
Dcp1b	5	8	0	0	0	0	0
Sigirr	1	0	0	0	0	0	0
Entpd8	1	0	0	0	0	0	0
Rps27l	16	0	0	0	0	0	0
2410080I02Rik	0	0	0	0	0	0	3
Dusp18	2	0	0	0	0	0	0
Fosl2	14	2	0	0	0	0	0
Pdia6	1	0	1	0	0	0	0
Dnmt3b	3	0	0	0	0	0	0
Tnik	1	0	0	0	0	0	0
Rsad1	1	0	0	0	0	0	0
Hoxc4	0	0	1	0	0	0	0
Ppargc1b	3	0	0	0	0	0	0
Pou5f1	14	0	0	0	0	0	0
Mtag2	0	0	4	0	0	0	0
Ms4a3	1	0	2	0	0	0	0
B2m	9	0	0	0	0	0	0
E230025N22Rik	3	0	0	0	0	0	0
Pcgf6	15	0	0	0	0	0	0
Snrpb	1	0	0	0	0	0	0
Zbp1	37	10	0	0	0	0	0
Snrnp27	3	0	0	0	0	0	0
Cda	0	1	0	0	0	0	0
Rfc2	3	0	0	0	0	0	0
BC022687	18	0	0	0	0	0	0
Inpp5a	0	3	0	0	0	0	0
Kat5	12	0	0	0	0	0	0
Thra	0	0	1	0	0	0	0
Lrfn2	2	0	0	0	0	0	0
Anxa11	1	0	0	0	0	0	0
Gm11661	1	0	0	0	0	0	0
Malat1	5	0	0	0	0	0	0
Wee1	0	0	0	0	0	0	2
Klhdc2	13	0	0	0	0	0	0
Micalcl	2	0	0	0	0	0	0
Wiz	0	0	0	0	0	0	1
Nccrp1	0	0	0	0	0	0	2
Mtmr11	13	0	0	0	0	0	0
Kiss1r	0	0	9	0	0	0	0
Fbxo45	4	0	0	0	0	0	0
Gm11425	5	0	0	0	0	0	2
Tex19.2	1	0	0	0	0	0	0
Atp5h	7	0	0	0	0	0	0
Pvrl4	5	0	2	0	0	0	0
Enc1	7	0	0	0	0	0	0
Mir29c	0	0	3	0	0	0	0
Itpripl2	0	1	0	0	0	0	0
Gm13475	0	1	0	0	0	0	0
Rpl30	2	0	0	0	0	0	0
9030619P08Rik	0	0	3	0	0	0	0
Nfe2l3	14	0	0	0	0	0	0
Incenp	1	0	0	0	0	0	0
Arl6ip5	0	1	0	0	0	0	0
Stxbp1	11	0	0	0	0	0	0
Cd3e	4	0	0	0	0	0	0
Mettl9	6	0	0	0	0	0	0
Camta1	0	1	0	0	1	0	3
Aim1	1	0	0	0	2	0	0
Trip6	0	0	0	0	0	0	1
Grpel2	6	0	0	0	0	0	0
Gm15561	1	0	0	0	0	0	0
Cd3g	4	0	0	0	0	0	0
Gm12506	1	0	0	0	0	0	0
Gm13545	0	2	0	0	0	0	0
Spatc1	1	0	0	0	0	0	0
Slu7	5	0	0	0	0	0	0
snoZ40	1	0	0	0	0	0	0
Pdcd11	14	0	0	0	0	0	0
Gm17110	1	0	0	0	0	0	1
Ctsf	2	0	0	0	0	0	0
D6Ertd527e	2	0	0	0	0	0	0
Pcdh1	17	0	0	0	0	0	0
Ppp1r1a	0	0	4	0	0	0	0
Lrrc37a	3	0	0	0	0	0	0
Tmsb10	4	3	0	0	0	0	0
Gm7027	0	0	8	0	0	0	0
Defb25	0	0	1	0	0	0	0
Gpr153	0	6	0	0	0	0	5
Psmd3	0	0	2	0	0	0	0
Gm16897	0	0	4	0	0	0	0
Klf3	18	0	0	0	0	0	0
Rpl7l1	0	0	0	0	1	0	0
Gm17725	2	0	0	0	0	0	0
Tgs1	2	0	0	0	0	0	0
Fkbp15	8	0	0	0	0	0	0
2410004P03Rik	19	0	13	0	0	0	0
Pid1	2	0	0	0	0	0	0
Nfe2	0	0	7	0	0	0	0
Pim2	0	4	0	0	0	0	0
Cfl1	13	0	0	0	0	0	0
Trib3	5	0	0	0	0	0	0
1700027A07Rik	0	2	0	0	0	0	0
Apip	6	0	0	0	0	0	0
Tubb4a	7	0	0	0	0	0	0
Nid2	1	0	0	0	0	0	0
Calhm2	14	0	0	0	0	0	0
AL732585.1	1	0	0	0	0	0	0
Mtap7	2	0	0	0	0	0	0
Yipf3	0	2	0	0	1	0	0
Gkn1	1	0	0	0	0	0	0
5033414D02Rik	4	0	0	0	0	0	0
Ebpl	0	0	0	0	0	0	1
Gm6081	2	0	0	0	0	0	0
Ghrh	4	0	0	0	0	0	0
Ccdc62	0	0	15	0	0	0	0
Fam171a2	0	4	0	0	0	0	0
Nckap1l	0	0	9	0	0	0	0
Gnaq	0	0	0	0	0	0	5
Romo1	7	5	0	0	0	0	0
Bglap	10	34	0	0	0	0	0
Wfdc3	0	3	0	0	0	0	0
Rsph1	3	0	0	0	0	0	0
Msto1	7	19	0	0	0	0	0
Sema4f	7	0	0	0	0	0	0
Ccdc80	7	0	0	0	0	0	0
Zfyve26	5	0	0	0	0	0	0
Fbxo38	7	0	0	0	0	0	0
2010109A12Rik	17	0	0	0	0	0	0
Ssr2	19	68	0	0	0	0	0
Prrc2b	5	0	0	0	0	0	0
Llgl2	2	0	0	0	0	0	0
Gm20397	2	0	0	0	0	0	0
Bcl2l1	1	0	3	0	0	0	0
Rbl1	6	0	0	0	0	0	1
Mgat2	7	0	0	0	0	0	0
Gm15488	1	0	0	0	0	0	0
Rnf114	7	2	0	0	0	0	0
Gm14262	1	0	0	0	0	0	0
Mrpl47	0	0	16	0	0	0	0
Tjap1	0	1	0	0	1	0	0
Gm13540	1	0	0	0	0	0	0
Mrpl14	8	0	0	0	0	0	0
Slc1a2	2	0	0	0	0	0	0
Atp6v1c1	18	0	0	0	0	0	0
Adam33	1	0	0	0	0	0	0
Lrrc4b	0	0	4	0	0	0	0
A930017M01Rik	9	0	0	0	0	0	0
Ccdc61	7	2	0	0	0	0	0
Gsdmd	1	0	0	0	0	0	0
Zmiz1	16	0	0	0	0	0	0
Dlst	7	5	0	0	0	0	0
Myo5c	9	0	0	0	0	0	0
Svep1	1	1	0	0	0	0	0
Comt	7	0	0	0	0	0	0
Slc16a5	3	0	0	0	0	0	0
Apbb3	6	0	0	0	0	0	0
Vav1	10	0	0	0	0	0	0
Src	12	0	0	0	0	0	0
Ddost	0	2	0	0	0	0	0
Atg14	2	0	0	0	0	0	0
Gm2976	0	0	1	0	0	0	0
Lst1	1	0	0	0	0	0	0
Gm14176	0	0	0	0	0	0	2
Gm16172	2	0	0	0	0	0	0
Lta4h	0	3	0	0	0	0	0
Tmem205	0	0	4	0	0	0	0
Hspe1	1	0	0	0	0	0	0
Mdc1	40	0	0	0	0	0	0
Arf2	1	0	0	0	0	0	0
Ctdspl2	5	0	0	0	0	0	0
Cdkal1	0	0	0	0	0	0	1
Ciita	3	0	1	0	0	0	0
C920025E04Rik	2	0	0	0	0	0	0
Fgfr3	0	6	0	0	0	0	0
Aup1	4	0	0	0	0	0	0
Maea	1	2	0	0	0	0	0
Gm20478	1	0	0	0	0	0	0
Vac14	12	6	0	0	0	0	0
Grin2d	0	0	1	0	0	0	0
Gm6044	2	0	0	0	0	0	0
Cyhr1	11	0	8	0	0	0	0
2410015M20Rik	1	0	0	0	0	0	0
Gm12355	0	0	2	0	0	0	0
Chst13	0	1	0	0	0	0	0
B3galnt1	0	0	0	0	1	0	0
Rps26	4	0	0	0	0	0	0
Gnat3	6	0	0	0	0	0	0
Mocs3	10	0	9	0	0	0	0
Zfp583	0	0	0	0	0	0	3
Vgll4	2	0	0	0	0	0	0
Lyrm5	0	0	0	0	0	0	2
Gm10767	0	0	0	0	0	0	1
Fcho2	7	0	0	0	0	0	0
Ccdc142	3	0	0	0	0	0	0
Ercc2	0	11	0	0	0	0	0
AC109138.1	1	0	0	0	0	0	0
Gm11543	2	0	0	0	0	0	0
Ier5l	17	0	0	0	0	0	0
Dnajc25	2	0	0	0	0	0	0
Mc1r	0	4	0	0	0	0	0
Entpd5	4	0	0	0	0	0	0
1700021K19Rik	2	0	0	0	0	0	0
Plekhg4	1	0	0	0	0	0	0
Mlh3	1	2	0	0	0	0	0
Mapre1	2	0	0	0	0	0	0
Gm11546	1	0	0	0	0	0	0
Cdc6	0	0	2	0	0	0	0
Ppp1r37	0	11	0	0	0	0	0
Gm11578	2	0	0	0	0	0	0
Pdhb	3	0	0	0	0	0	0
Rnf19a	3	0	0	0	0	0	0
Gm6030	5	0	0	0	0	0	0
Ranbp2	0	0	0	0	0	0	1
Gm11936	1	0	0	0	0	0	0
Grtp1	0	3	0	0	0	0	0
Il1a	4	0	0	0	0	0	0
Zdhhc19	6	0	0	0	0	0	0
Rbms3	1	0	0	0	0	0	0
Gm17068	0	0	0	0	0	0	2
Cdkn2b	5	0	0	0	0	0	0
Slc4a9	2	0	0	0	0	0	0
9030204H09Rik	1	0	0	0	0	0	0
Gm13574	2	0	1	0	0	0	0
Znrf2	4	0	0	0	0	0	0
Rhou	0	11	0	0	0	0	0
Apoa2	2	0	1	0	0	0	0
Gprin2	1	0	0	0	0	0	0
Ipo9	5	0	0	0	0	0	0
Naif1	5	0	0	0	0	0	0
Ttll9	0	0	2	0	0	0	0
Ptprr	1	0	0	0	0	0	0
Eny2	4	0	0	0	0	0	0
Rnf215	7	0	0	0	0	0	0
Trim54	0	1	0	0	0	0	0
Gm15718	0	1	0	0	0	0	0
Chd5	0	6	0	0	0	0	5
Cd36	14	0	0	0	0	0	0
snoU54	1	0	0	0	0	0	0
B430119L08Rik	4	0	0	0	0	0	0
Zdhhc5	5	0	0	0	0	0	0
Tubb3	0	8	0	0	0	0	0
Aars	10	6	0	0	0	0	0
Fndc4	0	2	0	0	0	0	0
Zbtb48	0	2	0	0	1	0	4
Trp63	1	0	0	0	0	0	0
A530016L24Rik	14	0	0	0	0	0	0
Pask	8	0	0	0	0	0	0
Ube2l6	5	0	0	0	0	0	0
Adora2a	3	0	0	0	0	0	0
Gcc2	0	0	0	0	0	0	1
Spint1	0	0	3	0	0	0	0
Gm11210	4	0	0	0	0	0	0
Gm16306	0	0	0	0	0	0	1
Dolk	5	0	0	0	0	0	0
1700013G24Rik	2	1	0	0	0	0	0
Ndst1	0	17	18	0	0	0	0
Ctla4	5	0	0	0	0	0	0
C87436	2	0	0	0	0	0	0
5031425E22Rik	0	0	0	0	0	1	0
Scgn	0	0	1	0	0	0	0
Zranb1	0	2	0	0	0	0	0
Ptges	16	0	0	0	0	0	0
Ubox5	1	0	0	0	0	0	0
Ppox	5	0	2	0	0	0	0
Gm12606	1	0	0	0	0	0	0
Gm8093	3	0	0	0	0	0	0
Srf	0	0	0	0	1	0	0
Thpo	3	0	0	0	0	0	0
Dennd5a	0	0	0	0	0	0	2
Tbcc	0	0	0	0	1	0	0
Gm13432	3	0	0	0	0	0	0
Gm13112	0	0	0	0	2	0	0
Rad51c	0	0	0	0	1	0	0
Mrap	1	0	0	0	0	0	0
Arhgef7	0	0	2	0	0	0	0
Gm7666	14	0	0	0	0	0	0
Trp53inp2	3	3	0	0	0	0	0
Afg3l1	0	13	0	0	0	0	0
Ddx39b	7	0	0	0	0	0	0
[truncated: 3,504 more rows]

## Sheet: 7d_Pb
Supplemental Table 7d: Enhancer peaks linked to DEGs for 'Pb over Veh' comparison (Figure 5)
Number of peaks in enhancers (for each histone mark) linked to DEGs (Enhancer Atlas, merged anchors)
Genes	Peak count for H3K27ac up peaks	Peak count for H3K4me1 up peaks	Peak count for H3K4me3 up peaks	M_liver_5mo_Pb.over.VEH	Peak count for H3K27ac down peaks	Peak count for H3K4me1 down peaks	Peak count for H3K4me3 down peaks
Mmp12	0	0	0	2.23378	0	0	0
Rpl10-ps3	0	0	0	1.81682	0	0	0
Mthfd1l	0	0	0	1.41918	0	0	0
Usp50	0	0	0	1.32394	1	0	0
Gsta2	0	0	0	1.29849	0	0	0
Ifi27l2b	0	0	0	1.28711	0	0	0
Cdkn1a	0	0	0	1.20215	0	0	3
Gstm3	0	0	0	1.04381	0	0	0
Nnmt	0	0	4	1.04285	0	0	0
Col1a1	0	0	0	1.03248	0	4	0
Nupr1	0	0	0	1.00261	0	0	0
Gm2000	0	0	0	0.996021	0	0	0
Gm11808	0	0	0	0.995355	0	0	0
Gm4737	0	0	0	0.98147	0	0	0
Ppl	0	0	0	0.957297	0	0	0
S100a11	0	0	0	0.926131	0	0	0
Pfkfb3	0	0	0	0.922296	0	0	0
Wdr74	0	0	0	0.917728	0	0	0
Acmsd	0	0	0	0.901865	0	0	0
Marco	0	0	0	0.887471	0	0	0
Lpin1	0	0	0	0.882093	0	0	0
Gadd45g	0	0	0	0.860554	7	0	0
Wdr89	0	0	0	0.846128	0	0	0
Lars2	0	0	0	0.837869	0	0	0
Hba-a1	0	0	0	0.831259	0	0	0
Sds	0	0	0	0.828447	0	0	0
Nr0b2	1	0	0	0.82732	0	0	0
Trim47	0	0	0	0.82262	0	0	0
Hamp	0	0	0	0.818114	0	0	0
Slc39a4	0	0	0	0.803256	0	0	0
Saa3	0	0	0	0.780009	0	0	0
Socs2	0	0	0	0.77267	0	0	0
Rps27rt	0	0	0	0.765149	0	0	0
Smim22	0	0	0	0.762679	0	0	0
Serpina7	0	0	0	0.75652	0	0	0
Cib3	0	0	0	0.747293	0	0	0
Cd63	0	0	0	0.722592	0	0	0
Thrsp	0	0	0	0.697842	0	0	0
Plk3	0	0	0	0.69025	0	0	0
Hbb-bs	0	0	0	0.68885	0	0	0
Foxq1	0	0	0	0.672125	0	0	0
Hamp2	0	0	0	0.670998	0	0	0
Anxa2	0	0	0	0.658396	0	0	0
Rpl24	0	0	0	0.642837	0	0	0
B4galt5	2	0	0	0.640893	0	0	0
Apoc3	0	0	0	0.637252	0	0	0
Ly6e	0	0	0	0.635036	0	0	0
Tuba1b	0	0	0	0.634458	0	0	0
Etfbkmt	0	0	0	0.628317	0	0	0
Ddah1	1	0	0	0.610713	0	0	0
Serpinh1	0	0	0	0.602672	0	0	0
Angptl8	0	0	0	0.591707	0	0	0
Gm872	0	0	0	0	0	0	2
Gm13622	7	0	0	0	0	0	0
Plcg1	0	0	2	0	0	0	0
Dis3l	2	0	0	0	0	0	0
Eno1	5	0	0	0	0	0	0
Top1	0	0	1	0	0	0	0
Gm17205	4	0	0	0	0	0	0
Snai1	2	0	0	0	0	0	0
Snx17	2	0	0	0	0	0	0
Gm15473	1	0	0	0	0	0	0
Stx2	6	0	0	0	0	0	0
Tsn	1	0	0	0	0	0	0
Shisa4	2	0	0	0	0	0	0
Syngr1	13	0	0	0	0	0	0
Tnnt2	11	0	0	0	0	0	0
Ubqln4	11	0	0	0	0	0	0
Lcn2	3	0	0	0	0	0	0
Zmat5	2	0	0	0	0	0	0
C030034L19Rik	2	0	0	0	0	0	0
Npas4	4	0	0	0	0	0	0
Aph1b	1	0	0	0	0	0	0
Serpina1e	1	0	0	0	0	0	0
Ptprv	1	0	0	0	0	0	0
Bptf	6	0	0	0	0	0	0
Ciz1	4	0	0	0	0	0	0
Cebpb	1	0	0	0	0	0	0
Gm13231	0	0	2	0	0	0	0
Fam151a	1	0	0	0	0	0	0
Creb3l1	1	0	0	0	0	0	0
Gm11960	3	0	0	0	0	0	0
Arid3b	3	0	0	0	0	0	0
Gls	11	0	0	0	0	0	0
Gm13624	1	0	0	0	0	0	0
Ssh1	0	0	2	0	0	0	0
Gm13815	2	0	0	0	0	0	0
Krit1	2	0	0	0	0	0	0
Rps26	3	0	0	0	0	0	0
Dao	0	0	1	0	0	0	0
Gm11342	0	0	1	0	0	0	0
Rrp9	6	0	0	0	0	0	0
Btf3l4	3	0	0	0	0	0	0
2310021P13Rik	0	0	1	0	0	0	0
Fbxl22	1	0	0	0	0	0	0
1700019G17Rik	0	0	0	0	0	0	1
Ran	7	0	0	0	0	0	0
Usp24	1	0	0	0	0	0	0
Mef2d	2	0	0	0	0	0	0
Bcl10	1	0	0	0	0	0	0
Lman1l	2	0	0	0	0	0	0
Aggf1	2	0	0	0	0	0	0
Lfng	3	0	0	0	0	0	0
Med19	7	0	7	0	0	0	0
Cpne5	0	0	0	0	0	0	7
Lrp3	2	0	0	0	0	0	0
Cav1	4	0	0	0	0	0	0
SNORD16	1	0	0	0	0	0	0
Rnpep	2	0	0	0	0	0	0
Extl3	0	0	0	0	3	0	0
Omg	0	0	1	0	0	0	0
4930509E16Rik	0	0	1	0	0	0	0
Nt5e	10	0	0	0	0	0	0
Dusp2	0	0	0	0	2	0	0
Gcfc1	4	0	0	0	0	0	0
Epha4	0	0	0	0	1	0	0
Sin3a	1	0	0	0	0	0	0
Ptrh1	1	0	0	0	0	0	0
Svip	0	0	1	0	0	0	0
Bri3bp	7	0	5	0	0	0	0
Traj6	0	0	0	0	1	0	0
Cfl1	15	0	0	0	0	0	0
Hspe1	1	0	0	0	0	0	0
Gm12284	1	0	0	0	0	0	0
Gm13844	1	0	0	0	0	0	0
Traj11	0	0	0	0	1	0	0
Klf14	1	0	0	0	0	0	0
Cav2	3	0	0	0	0	0	0
Rrp15	2	0	0	0	0	0	0
Pde4dip	0	0	1	0	0	0	0
Eef1e1	2	0	0	0	0	0	0
Hspa5	0	0	0	0	2	0	0
Ctsf	0	0	1	0	0	0	0
Ccdc45	3	0	0	0	0	0	0
Ciao1	0	0	0	0	2	0	0
Bcar3	0	0	1	0	0	0	0
Gm4450	0	0	1	0	0	0	0
Rere	4	0	0	0	0	0	0
Nat6	10	0	0	0	0	0	0
4930481A15Rik	5	0	0	0	0	0	0
Traj44	0	0	0	0	1	0	0
Wdtc1	1	0	0	0	0	0	0
Cnp	1	0	0	0	0	0	0
Ccl2	0	0	4	0	0	0	2
Acer3	3	0	0	0	0	0	0
Snx14	12	0	0	0	0	0	0
Psmd5	0	0	0	0	2	0	0
Myo7a	2	0	0	0	0	0	0
Scgn	0	0	1	0	0	0	0
Nrg1	1	0	0	0	0	0	0
Phf19	0	0	0	0	2	0	0
Cabp7	2	0	0	0	0	0	0
St6galnac6	3	0	0	0	0	0	0
Traj12	0	0	0	0	1	0	0
Mthfsd	0	0	3	0	0	0	0
Sart3	0	0	1	0	0	0	0
Ireb2	0	0	2	0	0	0	0
Srp14	4	0	0	0	0	0	0
Traj18	0	0	0	0	1	0	0
Slc4a9	0	0	1	0	0	0	0
Bag1	0	0	2	0	0	0	0
Hist4h4	1	0	0	0	0	0	0
Gm20503	0	0	1	0	0	0	0
Rab5c	1	0	0	0	0	0	0
Lrp10	0	0	0	0	6	0	0
Reg4	0	0	1	0	0	0	0
Serpina12	2	0	0	0	0	0	0
Gm12664	6	0	0	0	0	0	0
Muted	3	0	0	0	0	0	0
Trp53inp2	2	0	0	0	0	0	0
Gm9917	2	0	0	0	0	0	0
Jub	0	0	0	0	6	0	0
Stat1	11	0	0	0	0	0	0
Mir1905	3	0	0	0	0	0	0
Hmbox1	0	0	0	0	3	0	0
Fam83c	3	0	0	0	0	0	0
Tmem119	0	0	2	0	0	0	0
Gm13024	0	0	2	0	0	0	0
Mgp	1	0	0	0	0	0	0
Dnaja4	0	0	1	0	0	0	0
Kcnmb4	0	0	1	0	0	0	0
Traj34	0	0	0	0	1	0	0
Pdf	2	0	0	0	0	0	0
Serpina6	1	0	0	0	0	0	0
Ybx1	3	0	0	0	0	1	0
Gm8051	1	0	0	0	0	0	0
Nob1	4	0	0	0	0	0	0
Gm13710	1	0	1	0	0	0	0
Traj43	0	0	0	0	1	0	0
Traj4	0	0	0	0	1	0	0
Aig1	14	0	0	0	0	0	0
Smad6	1	0	0	0	0	0	0
Gm17096	1	0	0	0	0	0	0
Gm15557	1	0	0	0	0	0	0
Ccl12	0	0	2	0	0	0	1
Dhx58	1	0	0	0	0	0	0
Gins2	0	0	2	0	0	0	0
Ccdc30	2	0	0	0	0	1	0
Ect2	0	0	2	0	0	0	0
Ergic3	4	0	0	0	0	0	0
Gm13224	0	0	1	0	0	0	0
Cry2	3	0	0	0	0	0	0
Lrrc32	1	0	0	0	0	0	0
Smcr7l	25	0	0	0	0	0	0
Irs2	2	0	0	0	0	0	0
Gm3511	0	0	1	0	0	0	0
Apoa1bp	2	0	0	0	0	0	0
Plau	0	0	5	0	0	0	0
Cplx3	2	0	0	0	0	0	0
Tgfb2	2	0	0	0	0	0	0
Dennd5a	2	0	0	0	0	0	0
Traj37	0	0	0	0	1	0	0
Aqp11	1	0	0	0	0	0	0
Copg2	7	0	0	0	0	0	0
Agxt	0	0	0	0	0	1	0
Map1lc3a	2	0	0	0	0	0	0
Gm14212	0	0	0	0	1	0	0
Ssr2	13	0	0	0	0	0	0
Rplp1	1	0	0	0	0	0	0
Acot13	0	0	2	0	0	0	0
Fpgs	1	0	0	0	0	0	0
Hivep2	23	0	0	0	0	0	0
Tusc2	9	0	0	0	0	0	0
Gm8399	0	0	2	0	0	0	0
Hc	0	0	0	0	2	0	0
Gm6293	3	0	0	0	0	0	0
2310057M21Rik	2	0	0	0	0	0	0
Gm17518	1	0	0	0	0	0	0
5730559C18Rik	1	0	0	0	0	0	0
Zwilch	3	0	0	0	0	0	0
Rbm5	1	0	0	0	0	0	0
Nceh1	0	0	2	0	0	0	0
Ehbp1l1	5	0	0	0	0	0	0
Rps18	1	0	0	0	0	0	0
C230052I12Rik	1	0	0	0	0	0	0
Sfn	1	0	0	0	0	0	0
Lysmd3	0	0	2	0	0	0	0
SCARNA15	3	0	0	0	0	0	0
Snapc5	3	0	0	0	0	0	0
Dnajc7	1	0	0	0	0	0	0
Pias1	0	0	2	0	0	0	0
Gm16269	1	0	0	0	0	0	0
Trim16	5	0	0	0	0	0	0
Lrrc57	5	0	0	0	0	0	0
Utp14b	0	0	0	0	6	0	0
Gpatch1	3	0	0	0	0	0	0
Rbm4b	0	0	1	0	0	0	0
Pde4d	2	0	0	0	0	0	0
Rit1	12	0	0	0	0	0	0
Psmb11	0	0	0	0	1	0	0
Echdc2	19	0	0	0	0	0	0
Cyr61	1	0	0	0	0	0	0
Catsper1	4	0	0	0	0	0	0
Fnbp1l	0	0	1	0	0	0	0
Cish	16	0	0	0	0	0	0
Zmat2	0	0	5	0	0	0	0
Clk3	5	0	0	0	0	0	0
Gm17657	0	0	0	0	0	0	2
Ephx2	0	0	2	0	0	0	0
Enthd1	1	0	0	0	0	0	0
Wdr82	11	0	0	0	0	0	0
Odf1	2	0	0	0	0	0	0
4930539J05Rik	1	0	0	0	0	0	0
Arl6ip6	2	0	0	0	0	0	0
Ppib	1	0	0	0	0	0	0
Olfr49	0	0	0	0	4	0	0
5430419D17Rik	1	0	0	0	0	0	0
Gm11474	1	0	0	0	0	0	0
Bglap	8	0	0	0	0	0	0
AB041803	1	0	0	0	0	0	0
4930548H24Rik	1	0	0	0	0	0	0
Foxf1a	0	0	4	0	0	0	0
Bbs10	4	0	0	0	0	0	0
Card11	9	0	0	0	0	0	0
Gm11520	0	0	0	0	0	1	0
Csk	6	0	0	0	0	0	0
Traj33	0	0	0	0	1	0	0
Foxn4	0	0	1	0	0	0	0
Gm12898	0	0	0	0	0	1	0
Ctnnd1	3	0	3	0	0	0	0
Dsp	1	0	0	0	0	0	0
2810403A07Rik	4	0	0	0	0	0	0
6430573F11Rik	2	0	0	0	0	0	0
Gm16209	1	0	0	0	0	0	0
Tspo2	2	0	0	0	0	0	0
AY074887	0	0	2	0	0	0	0
9530026P05Rik	1	0	0	0	0	0	0
Alas1	10	0	0	0	0	0	0
Sec22c	1	0	0	0	0	0	0
Traj58	0	0	0	0	1	0	0
Gm6884	0	0	0	0	0	0	1
Tbc1d22b	0	0	0	0	0	0	10
2810025M15Rik	1	0	0	0	0	0	0
Serpina1d	1	0	0	0	0	0	0
Rbm15b	3	0	0	0	0	0	0
Traj2	0	0	0	0	1	0	0
Mapk8ip1	1	0	0	0	0	0	0
Gpr3	1	0	0	0	0	0	0
Ttyh3	5	0	0	0	0	0	0
Tnrc6b	1	0	0	0	0	0	0
Serpina9	1	0	0	0	0	0	0
Gse1	0	0	3	0	0	0	0
Gm13223	0	0	2	0	0	0	0
Ikzf5	3	0	0	0	0	0	0
Rps6ka1	1	0	0	0	0	0	0
Rnf8	0	0	0	0	0	0	5
Gm13610	2	0	0	0	0	0	0
BC005537	0	0	1	0	0	0	0
Agap1	1	0	0	0	0	0	0
Dhcr24	2	0	0	0	0	0	0
Cdan1	4	0	0	0	0	0	0
Nqo1	4	0	0	0	0	0	0
Pak6	1	0	0	0	0	0	0
Rbm39	1	0	0	0	0	0	0
Scp2	28	0	0	0	0	0	0
Tnni1	11	0	0	0	0	0	0
Gm10163	8	0	0	0	0	0	0
Myst2	0	0	0	0	0	4	0
Nup35	0	0	2	0	0	0	0
Tmem79	5	0	0	0	0	0	0
Gba	1	0	0	0	0	0	0
Pomt1	3	0	0	0	0	0	0
Fgd2	0	0	0	0	0	0	10
Zfp664	7	0	0	0	0	0	0
B130034C11Rik	2	0	0	0	0	0	0
Lrp2	1	0	0	0	0	0	0
Nav1	7	0	0	0	0	0	0
Gm16100	1	0	0	0	0	0	0
Myh7b	1	0	0	0	0	0	0
Rhbg	2	0	0	0	0	0	0
Srsf3	0	0	0	0	0	0	3
Rap1a	2	0	0	0	0	0	0
Pfdn1	0	0	5	0	0	0	0
Tmem92	0	0	0	0	0	1	0
Gm13540	1	0	0	0	0	0	0
Bglap2	6	0	0	0	0	0	0
Pacs1	18	0	0	0	0	0	0
Adss	1	0	0	0	0	0	0
Ovol1	8	0	0	0	0	0	0
Cacna2d2	2	0	0	0	0	0	0
Gm17041	5	0	0	0	0	0	0
H2afj	1	0	0	0	0	0	0
Slc43a1	2	0	2	0	0	0	0
B3gnt6	1	0	0	0	0	0	0
Syncrip	6	0	0	0	0	0	0
Ik	0	0	6	0	0	0	0
Ccl11	0	0	2	0	0	0	1
Fgr	1	0	0	0	0	0	0
Far1	5	0	0	0	0	0	0
Traj42	0	0	0	0	1	0	0
Mafb	1	0	0	0	0	0	0
Smok4a	0	0	4	0	0	0	0
Sec24c	0	0	1	0	0	0	0
Unc5cl	1	0	0	0	0	0	0
Ipo7	3	0	0	0	0	0	0
Capn3	2	0	0	0	0	0	0
Gm13229	0	0	2	0	0	0	0
Ube2r2	0	0	1	0	0	0	0
Met	4	0	0	0	0	0	0
Gm16337	1	0	0	0	0	0	0
Gon4l	8	0	0	0	0	0	0
Gm5423	1	0	0	0	0	0	0
Ap4e1	0	0	0	0	3	0	0
2310069G16Rik	9	0	0	0	0	0	0
Wdr61	0	0	1	0	0	0	0
Rpl29	6	0	0	0	0	0	0
Ttc25	1	0	0	0	0	0	0
H3f3a	1	0	0	0	0	0	0
Mvk	0	0	1	0	0	0	0
Ces1e	0	0	2	0	0	0	0
Lphn2	1	0	0	0	0	0	0
U6	12	0	1	0	0	0	0
Bmf	4	0	0	0	0	0	0
Mphosph6	0	0	0	0	1	0	0
Rpsa	0	0	1	0	0	0	0
Vps4a	2	0	0	0	0	0	0
Tmem87a	4	0	0	0	0	0	0
Psmd12	4	0	0	0	0	0	0
Tprkb	0	0	0	0	0	0	2
Uck1	4	0	0	0	0	0	0
6430550D23Rik	1	0	0	0	0	0	0
Dusp7	2	0	0	0	0	0	0
Otud1	2	0	0	0	0	0	0
Ulk3	7	0	0	0	0	0	0
Lad1	11	0	0	0	0	0	0
Apobec2	4	0	0	0	0	0	0
Jup	1	0	0	0	0	0	0
Eps15	1	0	0	0	0	0	0
Trdv5	0	0	0	0	1	0	0
Ddx27	1	0	0	0	0	0	0
Pkhd1l1	1	0	0	0	0	0	0
Zfp36l2	1	0	0	0	0	0	0
Dnd1	0	0	6	0	0	0	0
Mir199b	1	0	0	0	0	0	0
Eif4e2	0	0	2	0	0	0	0
Gm13228	0	0	1	0	0	0	0
Rasal2	1	0	0	0	0	0	0
Fam46b	1	0	0	0	0	0	0
Gm5513	0	0	1	0	0	0	0
Svop	0	0	3	0	0	0	0
Rpp25	7	0	0	0	0	0	0
Traj22	0	0	0	0	1	0	0
Bach1	7	0	0	0	0	0	0
Cct8	7	0	0	0	0	0	0
Zfp949	7	0	0	0	0	0	0
Eif1ad	4	0	0	0	0	0	0
Sec14l4	0	0	1	0	0	0	0
Rnpepl1	0	0	0	0	0	1	0
Gm16407	1	0	0	0	0	0	0
Gigyf2	0	0	2	0	0	0	0
Mrap	1	0	0	0	0	0	0
Gm7831	2	0	0	0	0	0	0
Amz1	4	0	0	0	0	0	0
Fam133b	6	0	0	0	0	0	0
Hemk1	16	0	0	0	0	0	0
Pofut1	1	0	0	0	0	0	0
Mtx1	2	0	0	0	0	0	0
Gm7866	4	0	0	0	0	0	0
Dap3	7	0	0	0	0	0	0
Tmco6	0	0	6	0	0	0	0
Stau1	1	0	0	0	0	0	0
Usp28	0	0	6	0	0	0	0
Kirrel	0	0	0	0	0	0	1
Ppcdc	6	0	0	0	0	0	0
Gm1337	1	0	0	0	0	0	0
Fam98b	6	0	0	0	0	0	0
Etl4	1	0	0	0	0	0	0
Gm17122	0	0	2	0	0	0	0
Ttbk2	2	0	0	0	0	0	0
Ptprr	0	0	1	0	0	0	0
AI314180	0	0	1	0	0	0	0
Hspb9	1	0	0	0	0	0	0
Slc45a3	5	0	0	0	0	0	0
Rpl4	3	0	0	0	0	0	0
Stard9	4	0	0	0	0	0	0
Adk	0	0	6	0	0	0	0
Ttc4	2	0	0	0	0	0	0
Snx10	3	0	0	0	0	0	0
Rpa2	1	0	0	0	0	0	0
Gm16538	1	0	0	0	0	0	0
Eif6	4	0	0	0	0	0	0
Dclk2	0	0	0	0	0	0	1
Bmp6	1	0	0	0	0	0	0
Fam101a	5	0	0	0	0	0	0
Pmf1	10	0	0	0	0	0	0
Mrpl11	3	0	1	0	0	0	0
Znfx1	2	0	0	0	0	0	0
Slc29a2	4	0	0	0	0	0	0
Actr3	2	0	0	0	0	0	0
Mllt4	0	0	3	0	0	0	0
0610038L08Rik	0	0	0	0	0	0	2
Zyg11b	16	0	0	0	0	0	0
Nostrin	4	0	2	0	0	0	0
Rhpn2	2	0	0	0	0	0	0
Gm17354	3	0	0	0	0	0	0
Slc38a3	1	0	0	0	0	0	0
Rnf114	2	0	0	0	0	0	0
1700021C14Rik	3	0	0	0	0	0	0
Erp27	1	0	0	0	0	0	0
Slc18a1	1	0	0	0	0	0	0
Zcchc14	1	0	0	0	0	0	0
Eif1	1	0	0	0	0	0	0
Gpatch4	1	0	0	0	0	0	0
Gm3764	2	0	0	0	0	0	0
Gm13212	0	0	2	0	0	0	0
Cpne3	2	0	0	0	0	0	0
Rce1	0	0	1	0	0	0	0
Setbp1	0	0	0	0	5	0	0
Synj1	4	0	0	0	0	0	0
4933407C03Rik	0	0	0	0	1	0	0
Rhbdd3	1	0	0	0	0	0	0
ORF63	2	0	0	0	0	0	0
Eny2	4	0	0	0	0	0	0
Slc45a1	2	0	0	0	0	0	0
Tomm22	1	0	0	0	0	0	0
Tmco5	1	0	0	0	0	0	0
Hbegf	0	0	6	0	0	0	0
Ghr	0	0	4	0	0	0	0
Mir1957	1	0	0	0	0	0	0
Efemp2	11	0	0	0	0	0	0
Slc29a3	0	0	1	0	0	0	0
F2rl2	3	0	0	0	0	0	0
1110008P14Rik	3	0	0	0	0	0	0
Gm10704	10	0	0	0	0	0	0
Gmnn	0	0	1	0	0	0	0
Zfp280d	6	0	2	0	0	0	0
Cacna1s	3	0	0	0	0	0	0
Ppil1	0	0	0	0	0	0	10
Marcks	0	5	0	0	0	0	0
Gm13239	0	0	2	0	0	0	0
A430105I19Rik	2	0	0	0	0	0	0
AU022252	2	0	0	0	0	1	0
Haus2	5	0	0	0	0	0	0
Trdj1	0	0	0	0	1	0	0
Plek	1	0	0	0	0	0	0
Chaf1b	1	0	0	0	0	0	0
Ncor1	1	0	0	0	0	0	0
Fam82b	2	0	0	0	0	0	0
Gm11447	0	0	1	0	0	0	0
Chtf8	1	0	0	0	0	0	0
8430427H17Rik	2	0	0	0	0	0	0
Gcsh	0	0	0	0	1	0	0
Ahdc1	1	0	0	0	0	0	0
AA543401	1	0	0	0	0	0	0
AV039307	1	0	0	0	0	0	0
2010106G01Rik	0	0	0	0	3	0	0
Gm10653	0	0	1	0	0	0	0
Bbs1	1	0	0	0	0	0	0
Stard7	0	0	0	0	3	0	0
Trib2	0	0	4	0	0	0	0
Mir2861	1	0	0	0	0	0	0
4931408A02Rik	2	0	0	0	0	0	0
Wee1	2	0	0	0	0	0	0
1700040I03Rik	0	0	0	0	0	0	1
Atf4	25	0	0	0	0	0	0
Cd164l2	1	0	0	0	0	0	0
Ppcs	1	0	0	0	0	1	0
Arl4c	1	0	0	0	0	0	0
Disp2	1	0	0	0	0	0	0
Trdj2	0	0	0	0	1	0	0
Smu1	0	0	2	0	0	0	0
Traj30	0	0	0	0	1	0	0
Gm13835	7	0	0	0	0	0	0
Banp	1	0	0	0	0	0	0
Banf1	5	0	0	0	0	0	0
Snord16a	1	0	0	0	0	0	0
Gm9881	4	0	0	0	0	0	0
Gm3355	0	0	1	0	0	0	0
Mtch1	0	0	0	0	0	0	10
Cog8	1	0	0	0	0	0	0
Ppm1g	2	0	0	0	0	0	0
Gm13785	1	0	0	0	0	0	0
Traj39	0	0	0	0	1	0	0
Spag4	1	0	0	0	0	0	0
Nfkb1	5	0	0	0	0	0	0
Eme1	0	0	0	0	0	1	0
Kat2a	1	0	0	0	0	0	0
Dad1	0	0	0	0	8	0	0
Gm17040	11	0	0	0	0	0	0
Cdk6	5	0	0	0	0	0	0
Ighv3	1	0	0	0	0	0	0
Traj21	0	0	0	0	1	0	0
Nkiras2	1	0	0	0	0	0	0
Asf1a	7	0	0	0	0	0	0
Cd1d2	0	0	0	0	0	0	2
Mmp17	1	0	0	0	0	0	0
Lpp	1	0	0	0	0	0	0
Syt11	7	0	0	0	0	0	0
Ubl7	5	0	0	0	0	0	0
Trim35	0	0	1	0	0	0	0
Myo1b	6	0	0	0	0	0	0
Ifrd2	14	0	0	0	0	0	0
Evi2a	0	0	2	0	0	0	0
BC004004	0	0	0	0	0	0	10
Rab11a	1	0	0	0	0	0	0
Txndc5	3	0	0	0	0	0	0
Scamp3	1	0	0	0	0	0	0
Pag1	12	0	0	0	0	0	0
Gm13226	0	0	2	0	0	0	0
Hmgcs2	0	0	19	0	0	0	0
Pcnxl2	0	0	0	0	0	0	5
Fam18b	10	0	0	0	0	0	0
Gm13847	1	0	0	0	0	0	0
Mir29a	1	0	0	0	0	0	0
Ak1	3	0	0	0	0	0	0
Trpv2	4	0	0	0	0	0	0
Zfp704	12	0	0	0	0	0	0
Fam3b	4	0	0	0	0	0	0
SNORD86	1	0	0	0	0	0	0
Tmprss2	3	0	0	0	0	0	0
Mapre1	1	0	0	0	0	0	0
Spred1	6	0	0	0	0	0	0
Calml4	0	0	1	0	0	0	0
Ccl7	0	0	4	0	0	0	2
Traj27	0	0	0	0	1	0	0
Timm17a	3	0	0	0	0	0	0
Traj55	0	0	0	0	1	0	0
1500012F01Rik	2	0	0	0	0	0	0
Prtg	0	0	2	0	0	0	0
Cox4i1	0	0	5	0	0	0	0
Trac	0	0	0	0	4	0	0
Atp6v1c1	5	0	0	0	0	0	0
Cdk9	2	0	0	0	0	0	0
Cd14	0	0	6	0	0	0	0
BC023829	1	0	0	0	0	0	0
Slc25a25	3	0	0	0	0	0	0
SNORD125	1	0	0	0	0	0	0
Rod1	0	0	1	0	0	0	0
1810019J16Rik	1	0	0	0	0	0	0
Hsd3b2	1	0	0	0	0	0	0
Gm3940	6	0	0	0	0	0	0
Naif1	4	0	0	0	0	0	0
Eng	3	0	0	0	0	0	0
Rpl35a	0	0	0	0	0	0	2
Gm12737	7	0	0	0	0	0	0
Ccdc157	0	0	1	0	0	0	0
Vcl	1	0	5	0	0	0	0
Rnaseh2c	12	0	0	0	0	0	0
Lrpprc	1	0	0	0	0	0	0
Serpina1b	1	0	0	0	0	0	0
Sytl1	1	0	0	0	0	0	0
Htr3b	0	0	1	0	0	0	0
Pcdha4	0	0	2	0	0	0	0
Chchd1	0	0	2	0	0	0	0
Kcnb1	1	0	0	0	0	0	0
Gapvd1	0	0	0	0	2	0	0
Gm14256	2	0	0	0	0	0	0
Fam184a	1	0	0	0	0	0	0
Ccdc92	6	0	0	0	0	0	0
Hars2	0	0	6	0	0	0	0
Sipa1	3	0	0	0	0	0	0
Capza2	2	0	0	0	0	0	0
Kctd10	0	0	2	0	0	0	0
Sgpl1	0	0	1	0	0	0	0
Lrrc16a	0	0	2	0	0	0	0
Tsku	2	0	0	0	0	0	0
Gm10382	13	0	5	0	0	0	0
Cnih2	8	0	0	0	0	0	0
Gm6297	0	0	1	0	0	0	0
Traj5	0	0	0	0	1	0	0
SNORA17	1	0	0	0	1	0	1
Podn	4	0	0	0	0	0	0
Clasp1	1	0	0	0	0	0	0
Vstm2a	5	0	0	0	0	0	0
Phlda1	1	0	0	0	0	0	0
AI314976	6	0	0	0	0	0	0
Eif4ebp3	0	0	6	0	0	0	0
Mmp14	0	0	0	0	7	0	0
Parp3	3	0	0	0	0	0	0
Nedd4	2	0	5	0	0	0	0
Cacna1i	4	0	0	0	0	0	0
Acy1	7	0	0	0	0	0	0
Traj17	0	0	0	0	1	0	0
Klhdc8a	1	0	0	0	0	0	0
Stxbp6	1	0	0	0	0	0	0
Acly	1	0	0	0	0	0	0
Acacb	0	0	3	0	0	0	0
D8Ertd82e	3	0	0	0	0	0	0
Nckap1	0	0	3	0	0	0	0
Pm20d1	3	0	0	0	0	0	0
Hyal3	7	0	0	0	0	0	0
Gm17130	1	0	0	0	0	0	0
Gm13476	1	0	0	0	0	0	0
A230028O05Rik	1	0	0	0	0	0	0
Kcne4	0	0	0	0	1	0	0
Chrnb4	0	0	1	0	0	0	0
Cnrip1	3	0	0	0	0	0	0
Psmb5	0	0	0	0	5	0	0
Rpl27	1	0	0	0	0	0	0
Atg16l1	0	0	1	0	0	0	0
Sgca	0	0	0	0	0	3	0
Atp6v1b2	4	0	0	0	0	0	0
Idh3a	0	0	1	0	0	0	0
Fam102a	4	0	0	0	0	0	0
H6pd	2	0	0	0	0	0	0
Tbc1d10a	0	0	1	0	0	0	0
Slc7a7	0	0	0	0	3	0	0
AC163629.1	0	0	0	0	0	0	1
Ccl8	0	0	2	0	0	0	1
Dusp19	0	0	3	0	0	0	0
Vault	0	0	3	0	0	0	0
Smurf2	6	0	0	0	0	0	0
Iscu	0	0	3	0	0	0	0
BC055111	1	0	0	0	0	0	0
Hdgf	1	0	0	0	0	0	0
Prpf38a	26	0	0	0	0	0	0
Nudcd1	2	0	0	0	0	0	0
Dlx3	0	0	0	0	0	2	0
Sned1	0	0	0	0	0	1	0
Gm10617	0	0	0	0	1	0	0
Gm6166	4	0	0	0	0	0	0
Vps13d	0	0	1	0	0	0	0
Drap1	4	0	0	0	0	0	0
Plekha1	1	0	0	0	0	0	0
Pdk2	0	0	0	0	0	4	0
Nol11	6	0	0	0	0	0	0
Lmna	12	0	0	0	0	0	0
Chmp5	0	0	2	0	0	0	0
Cebpg	3	0	0	0	0	0	0
Ccs	2	0	1	0	0	0	0
Ctsw	10	0	0	0	0	0	0
Ubb	1	0	0	0	0	0	0
Lamtor2	12	0	0	0	0	0	0
Ccdc152	0	0	2	0	0	0	0
Mir135a	2	0	0	0	0	0	0
Gm12739	16	0	0	0	0	0	0
Traj31	0	0	0	0	1	0	0
Mtfp1	0	0	1	0	0	0	0
Tmem62	3	0	0	0	0	0	0
Gm14257	2	0	0	0	0	0	0
Ubr5	3	0	0	0	0	0	0
Serpina1a	1	0	0	0	0	0	0
Ppp1r8	1	0	0	0	0	0	0
Pstk	3	0	0	0	0	0	0
Ube2v1	1	0	0	0	0	0	0
Gm11718	1	0	0	0	0	0	0
Elp3	0	0	3	0	0	0	0
Gm6542	0	0	4	0	0	0	0
Itpripl1	0	0	0	0	3	0	0
Tex9	5	0	5	0	0	0	0
Ncaph	0	0	0	0	3	0	0
Htr3a	0	0	1	0	0	0	0
Zyg11a	21	0	0	0	0	0	0
Oxa1l	0	0	0	0	8	0	0
Gm6433	3	0	0	0	0	0	0
Car5a	1	0	0	0	0	0	0
Dynlrb1	1	0	0	0	0	0	0
Cpeb2	1	0	0	0	0	0	0
Rassf10	1	0	0	0	0	0	0
Sema3f	1	0	0	0	0	0	0
Cbx7	8	0	0	0	0	0	0
Bace2	1	0	0	0	0	0	0
Fam65b	0	0	1	0	0	0	0
Traj9	0	0	0	0	1	0	0
Chst14	2	0	0	0	0	0	0
Klhdc4	1	0	0	0	0	0	0
Gm5544	0	0	1	0	0	0	0
Manba	4	0	0	0	0	0	0
Gm13343	1	0	0	0	0	0	0
Adamts9	2	0	0	0	0	0	0
Lbh	0	0	0	0	6	0	0
Arl8a	1	0	0	0	0	0	0
Commd7	2	0	0	0	0	0	0
Gm11345	0	0	1	0	0	0	0
Tfpi	5	0	5	0	0	0	0
Tcn2	0	0	1	0	0	0	0
Deb1	1	0	0	0	0	0	0
5930403N24Rik	0	1	0	0	0	0	0
Gm6128	0	0	1	0	0	0	0
Egfr	16	0	0	0	0	0	0
Csrp1	15	0	0	0	0	0	0
n	4	0	1	0	0	0	0
Esco2	0	0	1	0	0	0	0
Cdk18	4	0	0	0	0	0	0
Gm15654	1	0	0	0	0	0	0
Gm15549	3	0	0	0	0	0	0
5730437C11Rik	1	0	0	0	0	0	0
Tmx2	7	0	7	0	0	0	0
Lctl	1	0	0	0	0	0	0
Nf2	4	0	0	0	0	0	0
Hsd3b5	1	0	1	0	0	0	0
Ghdc	1	0	0	0	0	0	0
Gm13833	1	0	0	0	0	0	0
Spop	0	0	0	0	0	3	0
Cdc34	0	0	0	0	0	2	0
Phf17	2	0	0	0	0	0	0
2600006L11Rik	1	0	0	0	0	0	0
Zw10	0	0	4	0	0	0	0
Nrd1	1	0	0	0	0	0	0
Chd7	3	0	0	0	0	0	0
Susd1	0	0	1	0	0	0	0
Smg5	9	0	0	0	0	0	0
SNORA36	0	0	0	0	2	0	0
Fem1b	0	0	2	0	0	0	0
7SK	0	0	1	0	0	0	0
Plagl2	1	0	0	0	0	0	0
1110054M08Rik	1	0	0	0	0	0	0
Rerg	1	0	0	0	0	0	0
Car12	1	0	0	0	0	0	0
Rnf11	2	0	0	0	0	0	0
Brms1	9	0	1	0	0	0	0
1110004E09Rik	1	0	0	0	0	0	0
Traj61	0	0	0	0	1	0	0
Psma4	0	0	2	0	0	0	0
Traj38	0	0	0	0	1	0	0
Thoc5	3	0	0	0	0	0	0
Bub3	3	0	0	0	0	0	0
Aagab	1	0	0	0	0	0	0
Slc7a5	1	0	0	0	0	0	0
Sec16b	1	0	0	0	0	0	0
Coq10b	1	0	0	0	0	0	0
Gm15965	1	0	0	0	0	0	0
Ksr1	0	0	1	0	0	0	0
SNORA40	0	0	1	0	0	0	0
Foxc2	0	0	3	0	0	0	0
Rbm12	1	0	0	0	0	0	0
Pes1	0	0	1	0	0	0	0
Ccdc123	2	0	0	0	0	0	0
Gm13612	0	0	4	0	0	0	0
Wbp11	1	0	0	0	0	0	0
Gm12959	1	0	0	0	0	0	0
Wasf2	1	0	0	0	0	0	0
Tmem185b	1	0	0	0	0	0	0
Abhd14b	7	0	0	0	0	0	0
Gm12283	1	0	0	0	0	0	0
Nefh	3	0	0	0	0	0	0
Serpina3c	1	0	0	0	0	0	0
Zfp512	1	0	0	0	0	0	0
Serpina3f	2	0	0	0	0	0	0
Snrnp200	0	0	0	0	3	0	0
AC016814.1	1	0	0	0	0	0	0
Dnmt3b	2	0	0	0	0	0	0
Kcnj13	0	0	2	0	0	0	0
Gm12741	2	0	0	0	0	0	0
Mx1	5	0	0	0	0	0	0
SNORA70	1	0	0	0	0	0	0
RP23	3	0	2	0	0	0	0
Secisbp2	0	0	0	0	1	0	0
Gm4204	1	0	0	0	0	0	0
Cmah	0	0	4	0	0	0	0
Sra1	0	0	6	0	0	0	0
1700007K09Rik	1	0	0	0	0	0	0
Rpl31	1	0	0	0	0	0	0
Sema4d	0	0	0	0	7	0	0
Spc25	12	0	0	0	0	0	0
AI837181	4	0	0	0	0	0	0
Traj15	0	0	0	0	1	0	0
Dhx37	12	0	6	0	0	0	0
Ces1b	0	0	1	0	0	0	0
Cenpv	1	0	0	0	0	0	0
Nucks1	6	0	0	0	0	0	0
Ces1f	0	0	2	0	0	0	0
Kcnip1	6	0	0	0	0	0	0
Mrps28	1	0	0	0	0	0	0
Fabp5	10	0	0	0	0	0	0
Gm14320	1	0	0	0	0	0	0
Cd36	4	0	0	0	0	0	0
Ltbp3	2	0	0	0	0	0	0
Gm16988	0	1	0	0	0	0	0
Ung	0	0	3	0	0	0	0
Kif13b	0	0	0	0	2	0	0
Ascc2	4	0	0	0	0	0	0
Dnajc10	0	0	1	0	0	0	0
Cc2d2a	1	0	0	0	0	0	0
Gpr133	3	0	0	0	0	0	0
Tmprss5	0	0	1	0	0	0	0
6430571L13Rik	12	0	0	0	0	0	0
Gm10463	1	0	0	0	0	0	0
Rem2	0	0	0	0	3	0	0
Gm13689	0	0	3	0	0	0	0
Gm14221	0	0	1	0	0	0	0
Lass6	1	0	8	0	0	0	0
A930006K02Rik	1	0	0	0	0	0	0
Fam129b	1	0	0	0	0	0	0
Tsga13	1	0	0	0	0	0	0
Cdkn2c	2	0	0	0	0	0	0
Fam196b	4	0	0	0	0	0	0
Ptgr1	0	0	1	0	0	0	0
Plcb2	1	0	0	0	0	0	0
Guca2a	0	0	0	0	0	1	0
Cox4nb	0	0	4	0	0	0	0
Mapkapk3	16	0	0	0	0	0	0
Nat8	0	0	0	0	0	0	2
Bre	2	0	0	0	0	0	0
Traj49	0	0	0	0	1	0	0
Lepre1	2	0	0	0	0	1	0
Traj40	0	0	0	0	1	0	0
Aptx	0	0	2	0	0	0	0
Krtcap3	1	0	0	0	0	0	0
Pygo1	0	0	1	0	0	0	0
Ap1b1	2	0	0	0	0	0	0
Glyctk	10	0	0	0	0	0	0
Fahd2a	0	0	0	0	1	0	0
Prickle2	2	0	0	0	0	0	0
Scarb1	16	0	6	0	0	0	0
Dlx4	0	0	0	0	0	2	0
B130024G19Rik	1	0	0	0	0	0	0
Gal3st3	15	0	0	0	0	0	0
Pcx	0	0	1	0	0	0	0
Gnai1	1	0	0	0	0	0	0
Gm12013	1	0	0	0	0	0	0
Gm17606	0	0	0	0	1	0	0
Nfx1	0	0	2	0	0	0	0
Gm14532	1	0	0	0	0	0	0
Gm15563	1	0	0	0	0	0	0
Ces1g	0	0	2	0	0	0	0
Traj23	0	0	0	0	1	0	0
BC035947	0	0	0	0	4	0	0
Tlr9	8	0	0	0	0	0	0
Ints9	0	0	0	0	3	0	0
Gm13699	0	0	1	0	0	0	0
Spnb3	0	0	1	0	0	0	0
Stk38	0	0	0	0	0	0	2
Mogat1	0	0	0	0	2	0	0
AL929170.1	0	0	1	0	0	0	0
Gm12740	1	0	0	0	0	0	0
Ralb	1	0	0	0	0	0	0
Serpina3a	1	0	0	0	0	0	0
Abl1	1	0	0	0	0	0	0
Nktr	1	0	0	0	0	0	0
Rasl10a	1	0	0	0	0	0	0
Stat4	4	0	0	0	0	0	0
0610037L13Rik	1	0	0	0	0	0	0
Ggt7	3	0	0	0	0	0	0
Snora23	1	0	0	0	0	0	0
Sfswap	3	0	0	0	0	0	0
Mterfd2	0	0	0	0	0	1	0
A730015C16Rik	2	0	0	0	0	0	0
Htra1	2	0	0	0	0	0	0
Adam15	2	0	0	0	0	0	0
Arhgdib	1	0	0	0	0	0	0
Apobec3	6	0	0	0	0	0	0
Kpna2	4	0	0	0	0	0	0
Slc35a4	0	0	6	0	0	0	0
Kif21b	3	0	0	0	0	0	0
Gm17288	2	0	0	0	0	0	0
Gm13477	2	0	0	0	0	0	0
Pcbp4	7	0	0	0	0	0	0
Gm11344	0	0	2	0	0	0	0
Mrpl33	2	0	0	0	0	0	0
Gm12396	0	0	1	0	0	0	0
Dnm1	3	0	0	0	0	0	0
Ube2d3	6	0	0	0	0	0	0
Rpl3	24	0	0	0	0	0	0
Dusp11	0	0	0	0	0	0	2
Mir686	0	0	0	0	2	0	0
Ndufa2	0	0	6	0	0	0	0
Lemd1	2	0	0	0	0	0	0
Usp3	1	0	0	0	0	0	0
Wwp2	4	0	0	0	0	0	0
Gm12400	1	0	0	0	0	0	0
Cebpa	3	0	0	0	0	0	0
Tsga10ip	3	0	0	0	0	0	0
Nprl2	6	0	0	0	0	0	0
Hyal1	11	0	0	0	0	0	0
Chd6	0	0	1	0	0	0	0
Gm5617	0	0	6	0	0	0	0
Samd14	0	0	0	0	0	4	0
Tmem9	7	0	0	0	0	0	0
Trdv4	0	0	0	0	1	0	0
Traj46	0	0	0	0	1	0	0
Unc5b	0	0	1	0	0	0	0
Gm15994	4	0	0	0	0	0	0
Zfpm1	1	0	0	0	0	0	0
Map3k11	3	0	0	0	0	0	0
Swap70	2	0	0	0	0	0	0
Fam89b	9	0	0	0	0	0	0
Abcb11	7	0	0	0	0	0	0
Olig2	1	0	0	0	0	0	0
4930579G18Rik	0	0	0	0	1	0	0
Scara3	0	0	2	0	0	0	0
Gm13222	0	0	1	0	0	0	0
Chrna3	0	0	1	0	0	0	0
Gm10737	1	0	0	0	0	0	0
Gm13784	0	0	3	0	0	0	0
Hyal2	11	0	0	0	0	0	0
Cnot2	0	0	1	0	0	0	0
4933403G14Rik	0	0	0	0	0	0	3
Gtdc1	2	0	0	0	0	0	0
Trdv2	0	0	0	0	1	0	0
Epc1	1	0	0	0	0	0	0
Vps39	3	0	0	0	0	0	0
Ncor2	16	0	1	0	0	0	0
Gm16534	2	0	0	0	0	0	0
Epb4.1l1	1	0	0	0	0	0	0
Zdhhc24	0	0	1	0	0	0	0
Golga2	4	0	0	0	0	0	0
Gpn2	1	0	0	0	0	0	0
Nhedc2	1	0	0	0	0	0	0
Gm11514	0	0	0	0	0	1	0
Timm10	2	0	2	0	0	0	0
BC065403	0	0	1	0	0	0	0
Gpr62	2	0	0	0	0	0	0
Zeb2	4	0	0	0	0	0	0
SNORA42	3	0	0	0	0	0	0
Fut11	0	0	3	0	0	0	0
Oxct1	0	0	1	0	0	0	0
Stx7	0	0	0	0	0	0	1
U1	3	0	0	0	0	0	1
Nipsnap1	4	0	0	0	0	0	0
Grap2	1	0	0	0	0	0	0
Loxl1	1	0	0	0	0	0	0
Treml2	1	0	0	0	0	0	0
Rab25	9	0	0	0	0	0	0
Traj3	0	0	0	0	1	0	0
Irf8	0	0	5	0	0	0	0
Mapk14	0	0	0	0	0	0	1
Cln6	0	0	2	0	0	0	0
Nf1	0	0	2	0	0	0	0
Mex3a	12	0	0	0	0	0	0
Sh2d3c	1	0	0	0	0	0	0
Gm8330	5	0	0	0	0	0	0
Rin1	6	0	0	0	0	0	0
Sept7	2	0	0	0	0	0	0
Gm13990	1	0	0	0	0	0	0
Slc35c1	3	0	0	0	0	0	0
Sf3b2	17	0	0	0	0	0	0
Ggh	2	0	0	0	0	0	0
Megf11	2	0	0	0	0	0	0
Kctd20	0	0	0	0	0	0	2
Phlda3	14	0	0	0	0	0	0
Serpina3g	2	0	0	0	0	0	0
Iqce	8	0	0	0	0	0	0
Lpin3	0	0	2	0	0	0	0
Mme	1	0	0	0	0	0	0
Arntl	5	0	0	0	0	0	0
Mir3960	1	0	0	0	0	0	0
Cldn19	1	0	0	0	0	0	0
Ubr1	1	0	0	0	0	0	0
Gm13094	3	0	0	0	0	0	0
Gm5602	1	0	0	0	0	0	0
Coro1c	0	0	3	0	0	0	0
Ccdc23	2	0	0	0	0	1	0
Kcnmb1	6	0	0	0	0	0	0
Pim1	0	0	0	0	0	0	10
Zhx3	0	0	2	0	0	0	0
Ssbp3	1	0	0	0	0	0	0
Fbxo48	14	0	0	0	0	0	0
Sdr42e1	0	0	0	0	1	0	0
Slc2a1	1	0	0	0	0	1	0
Gpatch3	1	0	0	0	0	0	0
Traj16	0	0	0	0	1	0	0
Zdhhc17	2	0	0	0	0	0	0
Plcg2	0	0	0	0	1	0	0
Traj45	0	0	0	0	1	0	0
Cep250	4	0	0	0	0	0	0
Tnfsf10	0	0	1	0	0	0	0
Acin1	0	0	0	0	1	0	0
Traj25	0	0	0	0	1	0	0
Cisd2	6	0	0	0	0	0	0
Psmd7	4	0	0	0	0	0	0
Gclm	0	0	1	0	0	0	0
Lclat1	0	0	0	0	7	0	0
Gm15772	3	0	0	0	0	0	0
Rimkla	1	0	0	0	0	1	0
Gm11513	0	0	0	0	0	3	0
E530011L22Rik	1	0	0	0	0	0	0
B3gnt1	7	0	0	0	0	0	0
Pars2	2	0	0	0	0	0	0
Gpc1	0	0	0	0	0	1	0
Gm8603	0	0	1	0	0	0	0
Selplg	0	0	2	0	0	0	0
Usp30	0	0	3	0	0	0	0
Lonrf1	6	0	0	0	0	0	0
1700109H08Rik	5	0	0	0	0	0	0
Orc1	21	0	0	0	0	0	0
F2r	4	0	0	0	0	0	0
Dpp3	4	0	1	0	0	0	0
Rasgrp1	4	0	0	0	0	0	0
Wsb1	0	0	3	0	0	0	0
Stxbp1	1	0	0	0	0	0	0
Heatr8	1	0	0	0	0	0	0
Ddx5	4	0	0	0	0	0	0
Gm5918	0	0	1	0	0	0	0
2810442I21Rik	2	0	0	0	0	0	0
Gtf3c3	1	0	0	0	0	0	0
Kif3b	2	0	0	0	0	0	0
AW549877	0	0	1	0	0	0	0
C1qtnf7	1	0	0	0	0	0	0
Gm16508	1	0	0	0	0	0	0
Arhgef2	13	0	0	0	0	0	0
Zfp287	2	0	0	0	0	0	0
Commd4	3	0	0	0	0	0	0
Hnrnpa2b1	3	0	0	0	0	0	0
Hivep3	1	0	0	0	0	1	0
Aacs	11	0	6	0	0	0	0
Chst8	1	0	0	0	0	0	0
Cst6	11	0	0	0	0	0	0
Ptges2	4	0	0	0	0	0	0
Zbed3	1	0	0	0	0	0	0
Dpm2	4	0	0	0	0	0	0
Man2c1	3	0	0	0	0	0	0
Phgdh	0	0	28	0	0	0	0
Cct3	7	0	0	0	0	0	0
Gm4876	1	0	0	0	0	0	0
Fam117a	0	0	0	0	0	2	0
Tdp2	0	0	2	0	0	0	0
Fastkd1	7	0	0	0	0	0	0
Rfx7	1	0	5	0	0	0	0
Leprel4	1	0	0	0	0	0	0
Prmt5	0	0	0	0	5	0	0
Trpc4ap	4	0	0	0	0	0	0
Procr	2	0	0	0	0	0	0
Gm12011	1	0	0	0	0	0	0
Nap1l1	4	0	0	0	0	0	0
Usp6nl	2	0	0	0	0	0	0
Gm11032	1	0	0	0	0	0	0
Lgals9	0	0	1	0	0	0	0
Elk4	6	0	0	0	0	0	0
N6amt1	2	0	0	0	0	0	0
Spata2	2	0	0	0	0	0	0
Hap1	1	0	0	0	0	0	0
4930500F10Rik	2	0	0	0	0	0	0
Nuak2	3	0	0	0	0	0	0
Acsbg1	0	0	1	0	0	0	0
Rbks	2	0	0	0	0	0	0
Snord83b	2	0	0	0	0	0	0
Pln	6	0	0	0	0	0	0
Pex16	3	0	0	0	0	0	0
Map2k1	2	0	0	0	0	0	0
Gm4477	0	0	0	0	0	0	1
Cyb5b	2	0	0	0	0	0	0
Gm9329	6	0	0	0	0	0	0
Tmem127	0	0	0	0	2	0	0
Traj48	0	0	0	0	1	0	0
Fbxo4	0	0	1	0	0	0	0
Tmem115	10	0	0	0	0	0	0
Cbx3	2	0	0	0	0	0	0
Rnf215	0	0	1	0	0	0	0
Gm11343	0	0	2	0	0	0	0
Gpn1	4	0	0	0	0	0	0
Sepp1	0	0	2	0	0	0	0
Ube2q2	0	0	1	0	0	0	0
Skor1	0	0	1	0	0	0	0
Car6	1	0	0	0	0	0	0
Traj32	0	0	0	0	1	0	0
Azin1	5	0	0	0	0	0	0
Rela	7	0	0	0	0	0	0
Urb1	3	0	0	0	0	0	0
Tcte2	0	0	3	0	0	0	0
Pmp22	6	0	0	0	0	0	0
Slc9a8	2	0	0	0	0	0	0
Fbxw2	0	0	0	0	2	0	0
Pkp1	4	0	0	0	0	0	0
Polg2	1	0	0	0	0	0	0
Fbxw10	1	0	0	0	0	0	0
Stat5a	1	0	0	0	0	0	0
Fmnl2	3	0	0	0	0	0	0
Aqp7	0	0	1	0	0	0	0
Ubc	16	0	6	0	0	0	0
CT025673.1	1	0	0	0	0	0	0
Sema3b	1	0	0	0	0	0	0
Guca2b	0	0	0	0	0	1	0
Mir3093	2	0	0	0	0	0	0
Ccdc25	0	0	3	0	0	0	0
Apbb3	0	0	6	0	0	0	0
2010305A19Rik	36	0	0	0	0	0	0
Gm14016	1	0	0	0	0	0	0
1810010H24Rik	6	0	0	0	0	0	0
Fam159a	9	0	0	0	0	0	0
Ptgis	2	0	0	0	0	0	0
Nrbp1	1	0	0	0	0	0	0
Klc2	5	0	0	0	0	0	0
Ccndbp1	1	0	0	0	0	0	0
Slc25a33	1	0	0	0	0	0	0
Slc7a9	1	0	0	0	0	0	0
Sec22b	0	0	4	0	0	0	0
Ccdc85b	5	0	0	0	0	0	0
Tmem151a	4	0	0	0	0	0	0
Slc9a1	1	0	0	0	0	0	0
Dnajc25	0	0	1	0	0	0	0
Sema4a	10	0	0	0	0	0	0
D930015M05Rik	2	0	0	0	0	0	0
Abhd4	0	0	0	0	7	0	0
1110012L19Rik	3	0	0	0	0	0	0
Mir5122	1	0	0	0	0	0	0
2310046O06Rik	7	0	0	0	0	0	0
Slc35b1	0	0	0	0	0	1	0
snoU13	1	0	0	0	0	0	0
St6galnac4	3	0	0	0	0	0	0
Lcp2	10	0	0	0	0	0	0
Ganc	3	0	0	0	0	0	0
Nat8b	0	0	0	0	0	0	1
Ypel5	0	0	0	0	1	0	0
Baat1	9	0	0	0	0	0	0
Cc2d1b	18	0	0	0	0	0	0
Gnai2	14	0	0	0	0	0	0
Gpx7	31	0	0	0	0	0	0
Wdr55	0	0	6	0	0	0	0
Snx32	15	0	0	0	0	0	0
Cyp1a1	4	0	0	0	0	0	0
Gm5432	0	0	1	0	0	0	0
Bbs5	1	0	0	0	0	0	0
Sema7a	1	0	0	0	0	0	0
Atp6v0d2	2	0	0	0	0	0	0
Gm16441	1	0	0	0	0	0	0
Mmp24	2	0	0	0	0	0	0
Cd1d1	0	0	0	0	0	0	2
C530050E15Rik	0	0	1	0	0	0	0
Serpina11	1	0	0	0	0	0	0
Gm12750	1	0	0	0	0	0	0
Pitpnc1	1	0	0	0	0	0	0
Nt5c3l	1	0	0	0	0	0	0
AC044864.1	1	0	0	0	0	0	0
5830417I10Rik	10	0	0	0	0	0	0
Lrfn2	2	0	0	0	0	0	0
Aqp3	0	0	1	0	0	0	0
Pex3	1	0	0	0	0	0	0
Foxj3	3	0	0	0	0	1	0
Zfp286	6	0	0	0	0	0	0
Clp1	6	0	6	0	0	0	0
Pcdha3	0	0	1	0	0	0	0
Gm16046	0	0	1	0	0	0	0
Mgat3	9	0	0	0	0	0	0
Stx12	1	0	0	0	0	0	0
Tcf12	20	0	1	0	0	0	0
Mrpl52	0	0	0	0	6	0	0
Accn1	0	0	1	0	0	0	0
Hils1	0	0	0	0	0	2	0
Serpina1c	1	0	0	0	0	0	0
Sybu	14	0	0	0	0	0	0
Rps16	8	0	0	0	0	0	0
Herc1	1	0	0	0	0	0	0
Fam24a	1	0	0	0	0	0	0
Phf21a	2	0	0	0	0	0	0
Ltn1	4	0	0	0	0	0	0
Tnfrsf8	0	0	1	0	0	0	0
AA413626	2	0	0	0	0	0	0
Alms1	0	0	0	0	0	0	1
Itga3	0	0	0	0	0	4	0
Ngfr	0	0	0	0	0	1	0
Sec61g	31	0	0	0	0	0	0
Gm10253	2	0	0	0	0	0	0
Slc7a10	2	0	0	0	0	0	0
Gm13230	0	0	2	0	0	0	0
Gm15581	1	0	0	0	0	0	0
Rab1b	5	0	0	0	0	0	0
Rusc1	1	0	0	0	0	0	0
Cdrt4	4	0	0	0	0	0	0
Twf2	11	0	0	0	0	0	0
Klf10	5	0	0	0	0	0	0
Gm15270	0	0	0	0	0	0	1
Gm14472	1	0	0	0	0	0	0
Uqcc	4	0	0	0	0	0	0
Sema3c	3	0	0	0	0	0	0
Slc50a1	1	0	0	0	0	0	0
Mir5109	1	0	0	0	0	0	0
Ints10	4	0	0	0	0	0	0
Gm12955	2	0	0	0	0	0	0
Farsb	0	0	0	0	6	0	0
0610010O12Rik	0	0	6	0	0	0	0
Mmgt2	6	0	0	0	0	0	0
Mus81	12	0	0	0	0	0	0
Plb1	1	0	0	0	0	0	0
Ppih	3	0	0	0	0	1	0
Gatad1	3	0	0	0	0	0	0
Ralgps2	1	0	0	0	0	0	0
Larp1b	3	0	0	0	0	0	0
Ptprb	0	0	1	0	0	0	0
Notch2	0	0	10	0	0	0	0
C030048B08Rik	5	0	0	0	0	0	0
Nudc	1	0	0	0	0	0	0
Nudt19	1	0	0	0	0	0	0
Cml3	0	0	0	0	0	0	1
Gm13092	5	0	0	0	0	0	0
Tes	2	0	0	0	0	0	0
Rab7l1	5	0	0	0	0	0	0
Fancf	0	0	2	0	0	0	0
Lpl	3	0	0	0	0	0	0
Ndst2	0	0	3	0	0	0	0
Gm11341	0	0	2	0	0	0	0
Osbpl9	1	0	0	0	0	0	0
Pex1	6	0	0	0	0	0	0
Gm11717	4	0	0	0	0	0	0
Ccpg1	0	0	1	0	0	0	0
Nfat5	2	0	0	0	0	0	0
Gm11719	3	0	0	0	0	0	0
Asxl1	2	0	0	0	0	0	0
Smarca5	0	0	2	0	0	0	0
Slc41a1	5	0	0	0	0	0	0
Prdm11	1	0	0	0	0	0	0
B4galt1	0	0	2	0	0	0	0
Prrc2b	4	0	0	0	0	0	0
Traj24	0	0	0	0	1	0	0
4930404I05Rik	1	0	0	0	0	0	0
Cyp1a2	3	0	0	0	0	0	0
Cse1l	1	0	0	0	0	0	0
Edem2	4	0	0	0	0	0	0
Rbm14	1	0	1	0	0	0	0
Traj60	0	0	0	0	1	0	0
Acsl3	0	0	0	0	7	0	0
Clvs1	4	0	0	0	0	0	0
Pigu	2	0	0	0	0	0	0
4932438H23Rik	1	0	0	0	0	0	0
Fkbp10	1	0	0	0	0	0	0
Kti12	1	0	0	0	0	0	0
Hsd17b2	0	0	0	0	1	0	0
Rxfp4	4	0	0	0	0	0	0
E230025N22Rik	0	0	4	0	0	0	0
Zfp106	4	0	0	0	0	0	0
Scamp5	7	0	0	0	0	0	0
Stam2	3	0	0	0	0	0	0
Gm6893	0	0	0	0	0	0	1
Gm20537	2	0	0	0	0	0	0
Gm11816	2	0	0	0	0	0	0
F2rl1	3	0	0	0	0	0	0
Paqr6	7	0	0	0	0	0	0
Fosl1	1	0	0	0	0	0	0
Eif2ak4	4	0	0	0	0	0	0
Gm13718	3	0	3	0	0	0	0
D030055H07Rik	3	0	0	0	0	0	0
Gm16052	0	0	2	0	0	0	0
Rassf1	10	0	0	0	0	0	0
Epb4.1l5	1	0	0	0	0	0	0
Traj53	0	0	0	0	1	0	0
Gm13347	1	0	0	0	0	0	0
Ipo9	5	0	0	0	0	0	0
Gm15737	1	0	0	0	0	0	0
Tnfrsf1b	0	0	2	0	0	0	0
Sf3a1	1	0	1	0	0	0	0
Gm10045	0	0	0	0	0	0	1
Scara5	0	0	2	0	0	0	0
Gnat3	2	0	0	0	0	0	0
Gm11220	0	0	2	0	0	0	0
Rnf122	1	0	0	0	0	0	0
Bub1b	4	0	0	0	0	0	0
Dpf2	1	0	0	0	0	0	0
Pip5kl1	1	0	0	0	0	0	0
Ppm1m	11	0	0	0	0	0	0
Gm16049	0	0	2	0	0	0	0
Nrp1	0	0	7	0	0	0	0
Gm17146	3	0	0	0	0	0	0
Rwdd2b	1	0	0	0	0	0	0
Klhl11	1	0	0	0	0	0	0
Aim1l	1	0	0	0	0	0	0
AI182371	0	0	0	0	1	0	0
Ap3m1	0	0	6	0	0	0	0
SNORD12	1	0	0	0	0	0	0
1190005I06Rik	0	0	2	0	0	0	0
Akt2	12	0	0	0	0	0	0
Gm11522	0	0	0	0	0	1	0
BC046404	4	0	0	0	0	0	0
2700094K13Rik	2	0	2	0	0	0	0
Snx1	1	0	0	0	0	0	0
Ripk4	3	0	0	0	0	0	0
Gm11473	1	0	0	0	0	0	0
Gm11346	0	0	3	0	0	0	0
Gm12012	4	0	0	0	0	0	0
Cks2	0	0	0	0	1	0	0
Osbpl8	2	0	0	0	0	0	0
Mfsd4	6	0	0	0	0	0	0
Ppapdc3	2	0	0	0	0	0	0
1110021J02Rik	0	0	0	0	0	0	6
4930538K18Rik	0	0	0	0	0	1	0
Gm16050	0	0	1	0	0	0	0
Ppp3r1	1	0	0	0	0	0	0
Gm16098	1	0	0	0	0	0	0
2010003K11Rik	0	0	1	0	0	0	0
Pgap1	1	0	0	0	0	0	0
Gm17590	1	0	0	0	0	0	0
Tipin	3	0	0	0	0	0	0
Poc1a	9	0	0	0	0	0	0
Gm12282	6	0	0	0	0	0	0
Fosl2	3	0	0	0	0	0	0
Ebag9	4	0	0	0	0	0	0
Gm9311	0	0	0	0	4	0	0
1700029I15Rik	3	0	0	0	0	0	0
Pura	0	0	3	0	0	0	0
Gm13688	0	0	2	0	0	0	0
Gatsl3	0	0	1	0	0	0	0
Tlr4	0	0	6	0	0	0	0
Prpf40a	2	0	0	0	0	0	0
Ankrd44	1	0	0	0	0	0	0
Tmem50b	1	0	0	0	0	0	0
Btbd10	6	0	0	0	0	0	0
BC026585	1	0	0	0	0	0	0
Gm962	6	0	0	0	0	0	0
Hsd3b3	1	0	0	0	0	0	0
Tekt3	1	0	0	0	0	0	0
Cml1	0	0	0	0	0	0	2
Zfp143	2	0	0	0	0	0	0
Gm13597	0	0	4	0	0	0	0
Gm13981	6	0	0	0	0	0	0
1700017B05Rik	4	0	0	0	0	0	0
Gm600	0	0	1	0	0	0	0
Ppig	4	0	0	0	0	0	0
Dusp28	0	0	0	0	0	1	0
Dock3	8	0	0	0	0	0	0
4930567H17Rik	1	0	0	0	0	0	0
4930469K13Rik	4	0	0	0	0	0	0
A730090H04Rik	0	0	0	0	0	2	0
Spink4	0	0	1	0	0	0	0
Gm6756	0	0	3	0	0	0	0
Traj13	0	0	0	0	1	0	0
Scamp2	7	0	0	0	0	0	0
Pak1	3	0	0	0	0	0	0
Gm5121	5	0	0	0	0	0	0
Mcm9	5	0	0	0	0	0	0
Gm17596	3	0	0	0	0	0	0
Kat5	2	0	0	0	0	0	0
Mns1	3	0	5	0	0	0	0
Fibp	12	0	0	0	0	0	0
Rps19bp1	22	0	0	0	0	0	0
Slc2a5	2	0	0	0	0	0	0
0610031J06Rik	7	0	0	0	0	0	0
Podxl	3	0	0	0	0	0	0
Gm13257	1	0	0	0	0	0	0
Dhrs9	3	0	0	0	0	0	0
Mpi	7	0	0	0	0	0	0
Haus4	0	0	0	0	3	0	0
Gm13690	0	0	2	0	0	0	0
Cd248	7	0	0	0	0	0	0
Adra2b	0	0	0	0	1	0	0
Ces1c	0	0	2	0	0	0	0
Alkbh2	0	0	3	0	0	0	0
Ube2l6	5	0	5	0	0	0	0
2610039C10Rik	3	0	0	0	0	0	0
Gm8420	8	0	0	0	0	0	0
Mir5102	1	0	0	0	0	0	0
Serpina3m	1	0	0	0	0	0	0
Cyb561d2	10	0	0	0	0	0	0
A930017M01Rik	9	0	0	0	0	0	0
Ankhd1	0	0	5	0	0	0	0
Pi16	0	0	0	0	0	0	7
Gm13687	0	0	3	0	0	0	0
B430306N03Rik	1	0	0	0	0	0	0
Rab18	1	0	0	0	0	0	0
C030030A07Rik	1	0	0	0	0	0	0
Capn10	0	0	0	0	0	1	0
Nip7	1	0	0	0	0	0	0
Ankib1	2	0	0	0	0	0	0
Tmcc2	3	0	0	0	0	0	0
Gm3788	0	0	0	0	0	0	1
Gm1968	1	0	0	0	0	0	0
Zmynd12	3	0	0	0	0	1	0
Acss2	1	0	0	0	0	0	0
Calcrl	6	0	6	0	0	0	0
Gss	4	0	0	0	0	0	0
CT009512.1	0	0	0	0	1	0	0
BY080835	3	0	0	0	0	0	0
Gm13896	0	0	0	0	1	0	0
Tmem41b	3	0	0	0	0	0	0
Gm6823	1	0	0	0	0	0	0
Trpm7	0	0	0	0	3	0	0
BC021891	0	0	0	0	0	0	4
Slc35f3	0	0	0	0	0	0	2
Syde2	1	0	0	0	0	0	0
snoU83B	1	0	0	0	0	0	0
Zdhhc5	5	0	5	0	0	0	0
Psap	0	0	1	0	0	0	0
Tmem217	0	0	0	0	0	0	2
Vipr1	1	0	0	0	0	0	0
Fam78a	1	0	0	0	0	0	0
Fut10	1	0	0	0	0	0	0
Sf3b1	1	0	0	0	0	0	0
Efna5	3	0	0	0	0	0	0
Ewsr1	3	0	0	0	0	0	0
Gna12	8	0	0	0	0	0	0
Traj57	0	0	0	0	1	0	0
Ash1l	6	0	0	0	0	0	0
Diras2	0	0	0	0	1	0	0
Gm9964	0	0	2	0	0	0	0
Mkln1	10	0	0	0	0	0	0
Nfs1	2	0	0	0	0	0	0
Itgb1	0	0	10	0	0	0	0
Yif1a	7	0	0	0	0	0	0
Gm11475	1	0	0	0	0	0	0
Efhd1	0	0	1	0	0	0	0
Gm15615	1	0	0	0	0	0	0
Rexo2	0	0	5	0	0	0	0
BC029722	4	0	0	0	0	0	0
Gas2	0	0	2	0	0	0	0
Trem2	4	0	0	0	0	0	0
Gm12663	8	0	0	0	0	0	0
Cml2	0	0	0	0	0	0	2
Gm11476	1	0	0	0	0	0	0
Pde3a	1	0	0	0	0	0	0
Tab1	19	0	0	0	0	0	0
Slc25a44	11	0	0	0	0	0	0
Omp	2	0	0	0	0	0	0
Gm13413	3	0	0	0	0	0	0
Hars	0	0	6	0	0	0	0
Cep110	0	0	0	0	1	0	0
Hmx3	1	0	0	0	0	0	0
Msto1	5	0	0	0	0	0	0
Gm16585	1	0	0	0	0	0	0
D330050G23Rik	1	0	0	0	0	0	0
Zmynd10	5	0	0	0	0	0	0
Pcnxl3	4	0	0	0	0	0	0
Slc39a8	4	0	0	0	0	0	0
Zc3h18	1	0	0	0	0	0	0
Mtmr3	3	0	0	0	0	0	0
Gm16197	0	0	0	0	0	0	1
Gm12738	2	0	0	0	0	0	0
Edc3	7	0	0	0	0	0	0
Capn5	3	0	0	0	0	0	0
Nab1	6	0	0	0	0	0	0
Slc35f5	1	0	0	0	0	0	0
Zfp395	0	0	1	0	0	0	0
Smpdl3b	1	0	0	0	0	0	0
2410004B18Rik	1	0	0	0	0	0	0
Gpr176	1	0	0	0	0	0	0
Slc4a1ap	5	0	0	0	0	0	0
Camk2g	0	0	4	0	0	0	0
Gm16767	0	0	0	0	1	0	0
Sh3bp4	10	0	0	0	0	0	0
Tmem222	1	0	0	0	0	0	0
Prkd1	0	0	0	0	1	0	0
SNORA48	2	0	0	0	0	0	0
Nsmce4a	1	0	0	0	0	0	0
Zfp930	1	0	0	0	0	0	0
D2Ertd750e	2	0	0	0	0	0	0
Traj7	0	0	0	0	1	0	0
Gm4793	1	0	0	0	0	0	0
Adam30	0	0	2	0	0	0	0
Pgrmc2	3	0	0	0	0	0	0
2410006H16Rik	2	0	0	0	0	0	0
Zcchc11	14	0	0	0	0	0	0
Sec14l2	0	0	1	0	0	0	0
Gm17501	1	0	0	0	0	0	0
St7	1	0	0	0	0	0	0
Ttc39a	2	0	0	0	0	0	0
Snhg5	3	0	0	0	0	0	0
Zfp697	0	0	21	0	0	0	0
Hspd1	1	0	0	0	0	0	0
Serping1	1	0	1	0	0	0	0
Ube3b	0	0	3	0	0	0	0
Peli3	0	0	1	0	0	0	0
Trnp1	1	0	0	0	0	0	0
Hes1	1	0	0	0	0	0	0
Cpne1	2	0	0	0	0	0	0
Pvt1	1	0	0	0	0	0	0
Thbs3	1	0	0	0	0	0	0
Supt7l	5	0	0	0	0	0	0
Hdac2	0	1	0	0	0	0	0
Gsn	0	0	0	0	1	0	0
Gm11715	2	0	0	0	0	0	0
Gm13611	1	0	0	0	0	0	0
Usp16	7	0	0	0	0	0	0
Cdk17	0	0	0	0	0	0	2
Traj59	0	0	0	0	2	0	0
Ypel4	6	0	6	0	0	0	0
Zfp691	1	0	0	0	0	1	0
Traf1	0	0	0	0	2	0	0
Acadsb	3	0	0	0	0	0	0
5430417L22Rik	2	0	0	0	0	0	0
Sssca1	5	0	0	0	0	0	0
Traj36	0	0	0	0	1	0	0
Gm12403	0	0	1	0	0	0	0
Ivd	3	0	0	0	0	0	0
Serpina10	1	0	0	0	0	0	0
Nol6	0	0	2	0	0	0	0
Snap23	5	0	0	0	0	0	0
Mak16	3	0	0	0	0	0	0
Rabepk	0	0	0	0	2	0	0
Gm12743	1	0	0	0	0	0	0
Mx2	4	0	0	0	0	0	0
Gm16912	0	0	0	0	0	0	3
Iqgap2	1	0	0	0	0	0	0
Map3k6	1	0	0	0	0	0	0
Cox5a	7	0	0	0	0	0	0
Znhit6	1	0	0	0	0	0	0
Uchl4	3	0	0	0	0	0	0
Abhd14a	5	0	0	0	0	0	0
Ngdn	0	0	0	0	1	0	0
Romo1	3	0	0	0	0	0	0
Gm12281	1	0	0	0	0	0	0
Gpr157	2	0	0	0	0	0	0
Pbk	0	0	2	0	0	0	0
Agphd1	0	0	2	0	0	0	0
Gm11706	1	0	0	0	0	0	0
Gm13614	3	0	0	0	0	0	0
Gm9766	5	0	0	0	0	0	0
Tspan8	0	0	1	0	0	0	0
Swi5	4	0	0	0	0	0	0
Ftsjd2	0	0	0	0	0	0	10
Kcnv1	1	0	0	0	0	0	0
Ncoa6	1	0	0	0	0	0	0
Nfya	5	0	0	0	0	0	0
Traj52	0	0	0	0	1	0	0
Ppp1r9b	0	0	0	0	0	3	0
Pepd	3	0	0	0	0	0	0
Thbs1	1	0	0	0	0	0	0
Gm16108	0	0	1	0	0	0	0
Cuzd1	1	0	0	0	0	0	0
Sart1	6	0	0	0	0	0	0
Gm5428	1	0	0	0	0	0	0
Sec14l3	0	0	1	0	0	0	0
Gas2l1	1	0	0	0	0	0	0
Txndc12	2	0	0	0	0	0	0
Dgkz	1	0	0	0	0	0	0
Rab2a	1	0	0	0	0	0	0
Pdgfb	5	0	0	0	0	0	0
Ntpcr	0	0	0	0	0	0	7
AA415398	2	0	0	0	0	1	0
Uqcr10	5	0	0	0	0	0	0
Hao2	1	0	0	0	0	0	0
Rab14	0	0	0	0	2	0	0
Gm17117	4	0	0	0	0	0	0
Zbtb16	0	0	6	0	0	0	0
1700016C15Rik	1	0	0	0	0	0	0
Tle4	0	0	15	0	0	0	0
Blvra	0	0	0	0	3	0	0
Ppara	0	0	0	-0.584976	0	0	0
Rbm7	0	0	5	-0.587408	0	0	0
Trim44	0	0	0	-0.596399	0	0	0
Cyp8b1	0	0	0	-0.598731	0	0	0
Sqle	0	0	0	-0.600418	0	0	0
Nr1i3	0	0	0	-0.611748	0	0	0
Ces2c	0	0	0	-0.614677	0	0	0
Slc4a4	0	0	0	-0.622302	0	0	0
Acot3	0	0	0	-0.639765	0	0	0
Car3	0	0	0	-0.650529	0	0	0
Mup7	0	0	0	-0.654615	0	0	0
Mertk	0	0	0	-0.668706	0	0	0
Ahr	0	0	0	-0.678073	0	0	0
Carmil1	0	0	0	-0.712204	0	0	0
A1cf	0	0	0	-0.714552	0	0	0
Mreg	0	0	0	-0.720247	0	0	0
Tymp	0	0	0	-0.731286	0	0	0
Ncoa4	0	0	0	-0.748694	0	0	0
Susd4	0	0	0	-0.749551	0	0	0
Ces1d	0	0	2	-0.751739	0	0	0
Gm4952	0	0	0	-0.752602	0	0	0
Cyp4a31	0	0	0	-0.76899	0	0	0
Aatk	0	0	0	-0.786758	0	0	0
Cyp4a10	0	0	0	-0.800499	0	0	0
mt-Nd5	0	0	0	-0.802137	0	0	0
Ugt3a1	0	0	0	-0.80478	0	0	0
Syne1	0	0	0	-0.810917	0	0	0
Ugt1a1	0	0	0	-0.832234	0	0	0
Igfbp5	0	0	0	-0.843067	0	0	0
Plpp3	0	0	0	-0.866348	0	0	0
Tpm1	0	0	0	-0.888118	0	0	0
Tbx3	0	0	0	-0.894697	0	0	0
Ugt1a6a	0	0	0	-0.919687	0	0	0
Capn8	0	0	0	-0.928543	0	0	0
Neb	0	0	0	-0.93928	0	0	0
Dct	0	0	0	-0.942753	0	0	0
Cyp4a32	0	0	0	-0.943745	0	0	0
Tlr12	0	0	0	-0.943826	0	0	0
Cyp2c40	0	0	0	-0.951301	0	0	0
Mup14	0	0	0	-0.964522	0	0	0
Lipg	0	0	0	-0.97041	0	0	0
Adap2	0	0	0	-0.988832	0	0	0
Adra1a	0	0	0	-1.0399	0	0	0
Med12	0	0	0	-1.06041	0	0	0
1810046K07Rik	0	0	0	-1.07525	0	0	0
Sema5b	0	0	0	-1.07557	0	0	0
Tmem38a	0	0	0	-1.08928	0	0	0
Ugt1a6b	0	0	0	-1.10072	0	0	0
Atg9a	0	0	0	-1.10445	0	0	0
Des	0	0	0	-1.12586	0	0	0
Mup15	0	0	0	-1.13062	0	0	0
F830016B08Rik	0	0	0	-1.13756	0	0	0
Ldhb	0	0	0	-1.1903	0	0	0
Ugt1a5	0	0	0	-1.24402	0	0	0
Mup1	0	0	0	-1.24422	0	0	0
Cyp2c69	0	0	0	-1.29469	0	0	0
Col27a1	0	0	0	-1.30255	0	0	0
Pdk4	0	0	0	-1.41229	0	0	0
Thtpa	0	0	0	-1.41875	0	0	0
Fan1	0	0	0	-1.46356	0	0	0
Kcnk1	0	0	0	-1.63174	0	0	18
Slc25a4	0	0	0	-1.63179	0	0	0
Eno3	0	0	0	-1.71892	0	0	0
Cyp7a1	0	0	0	-1.87245	0	0	0
Tpm2	0	0	0	-1.94905	0	0	0
Atp1a2	0	0	0	-2.19161	0	0	0
Esrrg	0	0	0	-2.34299	0	0	0
Moxd1	0	0	0	-2.58524	0	0	0
Pygm	0	0	0	-3.39391	0	0	0
Mylpf	0	0	0	-3.51239	0	0	0

## Sheet: 7e_PM2.5 JHU
Supplemental Table 7e: Enhancer peaks linked to DEGs for 'PM2.5 JHUover Veh' comparison (Figure 5)
Number of peaks in enhancers (for each histone mark) linked to DEGs (Enhancer Atlas, merged anchors)
Genes	Peak count for H3K27ac up peaks	Peak count for H3K4me1 up peaks	Peak count for H3K4me3 up peaks	M_liver_5mo_PM2.5JHU.over.VEH	Peak count for H3K27ac down peaks	Peak count for H3K4me1 down peaks	Peak count for H3K4me3 down peaks
Mt2	0	0	0	4.08875	5	0	0
Mt1	0	0	0	3.39661	5	0	0
Cyp4a14	0	1	1	3.23925	0	0	0
Lcn2	0	0	0	3.1423	0	0	0
Nipal1	0	0	0	3.09274	0	0	0
Cdkn1a	0	6	0	3.07323	0	1	0
Acot3	0	20	7	3.05108	0	0	0
Rab30	0	0	0	2.7311	0	0	0
Gpat3	0	0	0	2.58691	0	0	0
Cyp2b10	0	0	0	2.5082	0	0	0
Cyp4a31	0	0	1	2.46972	0	0	0
Fam107a	0	0	3	2.40317	0	0	0
Lars2	0	0	0	2.37018	0	0	0
Ppp1r3c	0	0	0	2.29015	0	0	0
Cyp4a10	0	1	1	2.2554	0	0	0
St3gal5	0	0	0	2.14484	0	0	0
Obp2a	0	0	0	2.10168	0	0	0
Rgs16	0	11	10	2.00843	0	0	0
Slc16a5	0	0	0	1.99684	0	0	0
Grhl1	0	0	0	1.95796	0	0	0
Fkbp5	0	0	0	1.89694	0	0	0
Acot4	0	11	5	1.81986	0	0	0
Cyp4a32	0	0	1	1.80022	0	0	0
Acot1	0	27	7	1.78756	0	0	0
Cda	0	0	0	1.76604	0	0	0
2010003K11Rik	0	4	0	1.73306	0	10	0
Nlrp12	0	0	0	1.69926	0	0	0
Tmc7	0	0	0	1.69379	0	1	0
Orm3	0	0	0	1.6601	0	0	0
Vnn1	0	0	1	1.6504	0	0	0
Il6ra	0	0	0	1.64465	0	0	0
Gadd45g	0	0	0	1.63601	0	17	2
Ttll8	0	0	0	1.62055	0	0	0
Lipg	0	3	0	1.6165	0	0	0
Serpina3n	0	0	0	1.60246	0	0	0
Cers6	0	0	0	1.57709	0	0	0
Cdh4	0	0	0	1.53591	0	0	0
Cyp4a12b	0	0	1	1.52517	0	0	0
Cyp2a22	0	0	0	1.51975	0	2	0
Saa2	0	0	0	1.51258	0	0	0
Eif4ebp3	0	0	0	1.49759	0	0	0
Themis	0	0	0	1.48617	0	0	0
Acot2	0	27	7	1.47148	0	0	0
1810055G02Rik	0	2	0	1.46659	0	0	0
Igfbp1	0	0	0	1.45151	0	2	0
Crybg2	0	0	0	1.43844	0	0	0
Slc22a7	0	0	0	1.43644	0	0	0
Gpx6	0	0	0	1.40778	0	0	0
Map3k6	0	0	0	1.39536	0	0	0
Epha2	0	0	0	1.3761	0	0	0
Cfd	0	0	0	1.37267	6	0	0
Slc17a8	0	0	0	1.34809	0	0	0
Bach2	0	0	0	1.33621	0	0	0
Slc16a6	0	0	0	1.32506	0	0	0
Ctif	0	1	0	1.32023	0	0	0
Mfsd2a	0	0	0	1.31948	3	3	0
Cyp2c38	0	0	0	1.29866	0	0	0
Slc22a5	0	0	0	1.29694	0	0	0
Slc6a9	0	5	0	1.29646	0	1	0
Cep85l	0	0	0	1.29369	0	0	0
Pnldc1	1	5	0	1.29348	0	0	0
Lrg1	0	5	0	1.29231	0	0	0
Tacc2	0	4	0	1.29197	14	0	0
Fam214a	0	0	0	1.29123	0	0	0
Cyp26b1	0	11	0	1.28404	0	0	0
Acss3	0	0	0	1.27186	0	0	0
Psma8	0	0	0	1.26554	0	0	0
Sbk1	0	0	0	1.26537	0	0	0
Txnip	0	0	0	1.26195	0	0	0
Cidec	0	9	0	1.25492	0	0	0
Mtnr1a	0	0	0	1.25403	0	0	0
Steap4	0	0	0	1.25364	0	0	0
Inhbb	0	0	0	1.23848	0	3	0
Orm2	0	0	0	1.232	0	0	0
Lbp	0	3	0	1.22435	0	0	0
Plin2	0	0	0	1.20894	0	0	0
Trim24	0	0	0	1.20783	0	5	0
Plin4	0	4	0	1.20772	0	0	0
Egr1	0	0	0	1.20157	0	0	0
Ildr2	0	0	0	1.19827	0	0	0
Prox1	0	0	0	1.18553	0	0	0
Kcnk5	0	0	0	1.17448	0	1	0
Enc1	0	0	0	1.14717	0	4	0
Cyp2c39	0	0	0	1.1471	0	0	0
Rec114	0	0	0	1.14097	0	0	0
Prg4	0	0	0	1.14021	0	0	0
Csrp3	0	0	0	1.1389	0	0	0
Baiap2	0	2	0	1.11757	0	0	0
Tent5c	0	0	0	1.11403	0	0	0
Shld2	0	0	0	1.11291	0	0	0
Pls1	0	0	0	1.10958	0	0	0
Brca1	0	2	0	1.10258	0	0	0
Slc45a3	0	10	0	1.10157	0	0	0
Ar	0	0	0	1.09616	0	0	0
Wipf3	0	2	0	1.09594	0	0	0
Cpox	0	1	0	1.0956	0	0	0
Ppara	0	0	0	1.09456	0	0	0
Saa4	0	0	0	1.09373	0	0	0
Fzd6	0	0	0	1.09356	0	0	0
Cgref1	0	0	0	1.09331	0	0	0
Tram2	0	0	0	1.09219	0	0	0
Serpinb1c	0	0	0	1.09214	0	0	0
Gpcpd1	0	0	0	1.09169	0	0	0
Eci2	0	0	0	1.08701	0	1	0
Acot6	0	20	4	1.0869	0	0	0
Cyp2e1	0	0	0	1.07853	0	0	0
Zbed5	0	0	0	1.07805	0	0	0
Taok3	0	0	0	1.0746	0	0	0
Acnat2	0	0	0	1.0743	0	0	0
Slc4a4	0	0	0	1.06845	0	0	0
Chrna2	0	0	0	1.06381	0	0	0
Cd163	0	4	2	1.06281	0	0	0
Rfx4	0	10	0	1.05832	0	0	0
Spata2l	0	0	0	1.0561	0	0	0
Aatk	0	1	0	1.05463	0	0	0
Il1r1	0	0	0	1.05042	0	0	0
Lpin1	0	0	0	1.05033	0	0	0
Mgll	0	0	0	1.04969	0	0	0
Tsku	0	0	0	1.04212	0	0	0
Retsat	0	0	0	1.03549	0	0	0
Fga	0	0	0	1.0284	0	0	0
Pck1	0	8	0	1.02512	0	0	0
Retreg1	0	0	0	1.01784	0	0	0
Elmod3	0	0	0	1.01683	0	0	0
Gdap2	0	0	0	1.01598	0	0	0
Creld2	0	0	0	1.01517	0	0	0
Fndc3b	0	0	0	1.01395	6	14	0
Rhobtb1	0	0	0	1.00456	0	0	0
Sec62	0	0	0	0.997149	0	0	0
Abcb4	0	0	0	0.996818	0	0	0
Susd6	0	0	0	0.994539	0	0	0
Ppip5k2	0	0	0	0.994237	0	0	0
Fn1	0	0	0	0.992871	0	0	0
Angptl4	0	0	0	0.99148	0	0	0
Pde4d	0	4	0	0.989687	0	0	0
Slc27a2	0	0	0	0.988121	0	0	0
Zfp143	0	0	0	0.984365	0	5	0
Pdzrn3	0	0	0	0.983833	0	0	0
Ddit4	0	0	0	0.981301	19	0	0
Ugt1a1	0	0	0	0.979708	0	0	0
Prob1	0	0	0	0.976998	0	0	0
Serpina3m	0	0	0	0.972191	0	0	0
Rsad2	0	0	0	0.963025	0	0	0
Jun	0	0	0	0.962902	0	0	0
Serpinb1a	0	0	0	0.955207	0	0	0
Cpt1a	0	4	1	0.954557	0	0	0
Inhbe	0	0	0	0.950479	0	0	0
Cfap43	0	0	0	0.95036	0	0	0
Saa1	0	0	0	0.947311	0	0	0
Mogat1	0	0	0	0.945552	0	0	0
Crybg1	0	0	0	0.942987	0	0	0
Aldh3a2	0	0	0	0.942969	0	0	0
Pex11a	1	0	1	0.942819	0	0	0
Plpp3	0	0	0	0.937909	0	0	0
Rapgef4	0	0	0	0.934547	0	0	0
Insig2	0	0	0	0.929894	0	0	0
Cerkl	0	0	0	0.929167	0	0	0
Sun2	0	0	0	0.928327	0	0	0
Scara5	0	0	0	0.927247	9	24	2
Nt5e	0	0	0	0.925966	0	0	0
Tenm3	0	0	0	0.924494	0	0	0
Cyp8b1	0	0	0	0.924081	0	0	0
Hmgcs2	0	0	0	0.923066	0	0	0
Nos1ap	0	0	0	0.920223	0	3	0
Prlr	0	0	0	0.917258	0	0	0
Ccnf	0	0	0	0.910834	0	0	0
Tmtc2	0	0	0	0.910699	0	0	0
Cntrl	0	0	0	0.908086	0	0	0
Flvcr2	0	0	0	0.907119	0	0	0
Slc25a20	0	1	0	0.901695	3	0	0
Cnst	0	0	0	0.898651	0	0	0
Tbl1xr1	0	0	0	0.894711	0	0	0
Smc1a	0	0	0	0.893821	0	1	0
Alpl	0	0	0	0.888966	0	0	0
Nxpe2	0	0	0	0.886511	0	0	0
Pnpla2	0	0	0	0.884882	0	0	0
Agap2	0	0	0	0.883218	0	0	0
Sec24d	0	0	0	0.88316	0	0	0
Tgoln1	0	0	0	0.882391	0	0	0
Crat	0	3	0	0.877223	0	0	0
Pdp2	0	0	0	0.86999	0	0	0
Tmem87b	0	0	0	0.867817	0	0	0
Crygn	0	0	0	0.867582	0	0	0
Bcl6	0	0	0	0.866154	0	0	0
Fgf1	1	0	0	0.866048	0	0	0
Kcnt2	0	0	0	0.862777	0	0	0
Rreb1	0	1	0	0.861649	0	0	0
Acnat1	0	0	0	0.860011	0	1	0
Jade2	0	0	0	0.859079	0	0	0
Hectd1	0	0	0	0.858812	0	0	0
Zfp292	0	0	0	0.856919	0	0	0
Rad54l2	0	0	0	0.855896	0	0	0
B3galt1	0	0	0	0.854605	0	0	0
Cyp4a12a	0	0	1	0.852613	0	0	0
Zbtb20	0	0	0	0.851595	0	0	0
Mafb	0	0	0	0.851495	0	0	0
G0s2	0	0	0	0.850935	0	0	0
Dph5	0	0	0	0.842526	0	0	0
Fitm2	0	0	0	0.841888	0	2	0
Igsf11	0	0	0	0.84143	0	0	0
Slc41a3	0	0	0	0.841387	0	0	0
Stx1b	0	0	0	0.840716	0	0	0
Trp53bp2	0	0	0	0.838277	0	0	0
Mttp	0	0	0	0.836809	0	0	0
Vwa8	0	0	0	0.835659	0	0	0
Trib3	0	0	0	0.835647	0	0	0
Stat3	0	13	0	0.834903	0	0	0
Arrdc2	0	0	0	0.834078	0	0	0
Srrm4	0	0	0	0.831466	0	0	0
Abcc3	0	0	0	0.828396	0	0	0
Ces1g	0	0	0	0.826756	0	0	0
Gm7694	0	0	0	0.825513	0	3	0
Bmyc	0	0	0	0.824842	0	0	0
Mme	0	6	0	0.823852	0	0	0
Foxo1	0	0	0	0.822508	0	0	0
Dnmbp	0	0	0	0.822138	0	0	0
Rarres1	0	0	0	0.818127	0	0	0
Cebpb	8	0	0	0.815168	0	0	0
Pik3ap1	0	0	0	0.812238	0	0	0
Pcsk6	0	0	0	0.811842	0	0	0
Por	0	2	0	0.809014	0	0	0
Fbf1	0	0	0	0.808065	0	0	0
Plin5	0	3	0	0.807214	0	0	0
Cyp2c29	0	0	0	0.802499	0	0	0
Map3k13	2	0	0	0.802367	0	0	0
Slc6a16	0	0	0	0.801619	0	0	0
Garem1	0	0	0	0.800752	0	0	0
Kdm2b	0	0	0	0.800535	0	0	0
Myo1e	0	0	0	0.798277	0	0	0
Hic2	0	0	0	0.790028	0	2	0
Acer2	0	0	0	0.786063	0	0	0
Ik	0	0	0	0.785514	0	0	0
Paqr7	0	0	0	0.784487	0	0	0
Npc1	0	0	0	0.781894	0	0	0
Mug1	0	0	0	0.780736	0	0	0
Nr1i3	0	0	0	0.780119	0	0	0
Slc17a4	0	0	0	0.779248	0	0	0
Pxmp4	0	0	0	0.778686	0	0	0
Rhbdd2	0	3	0	0.777768	0	0	0
Ephx1	0	0	0	0.774833	0	0	0
Hsd17b11	0	0	0	0.774508	0	0	0
Grn	0	0	0	0.774027	0	0	0
Lad1	0	0	0	0.773917	0	0	0
Slc22a26	0	1	0	0.773452	0	0	0
Trp53inp1	0	0	0	0.773195	0	0	0
Acot12	0	0	0	0.772147	0	0	0
Cyp2a12	0	0	0	0.771655	0	6	0
Glul	0	6	5	0.770221	0	0	0
Acox1	0	0	0	0.768706	0	0	0
Nedd4l	0	0	0	0.763921	0	1	0
Usp2	0	2	0	0.761532	0	0	0
Acadm	0	0	0	0.759792	0	0	0
Rnf24	0	0	0	0.759204	0	0	0
Gm4952	0	0	0	0.758705	0	0	0
Trp53inp2	0	0	0	0.756696	0	0	0
Rusc2	0	15	0	0.751788	0	0	0
Eppk1	0	0	0	0.7501	0	0	0
Ahr	0	0	0	0.748926	0	0	0
Elovl3	0	0	0	0.746471	0	0	2
Synj2	0	3	0	0.745502	7	13	0
Rtf2	0	0	0	0.74388	0	0	0
Tlr5	0	1	0	0.742709	0	0	0
Lpgat1	0	1	0	0.740968	0	0	0
Lrfn3	0	0	0	0.738651	0	0	0
Cenpm	3	3	0	0.738193	0	0	0
Abcc4	0	0	0	0.737521	0	0	0
Pid1	0	0	0	0.737334	0	0	0
Dio1	0	0	0	0.735128	0	0	0
Cobll1	0	0	0	0.73485	0	1	0
Cyp2c50	0	0	0	0.733739	0	0	0
Rhbg	0	0	0	0.732429	0	0	0
Sulf2	0	10	0	0.729675	0	0	0
Hsdl2	0	0	0	0.72885	0	0	0
Rab3gap1	0	0	0	0.728494	0	4	0
Gpc4	0	0	2	0.727816	0	0	0
Dclre1b	0	0	0	0.726648	0	0	0
Slc15a5	0	0	0	0.724028	0	0	0
Slc39a14	0	0	0	0.722745	0	0	0
Etfdh	0	0	0	0.719588	0	0	0
Herpud1	0	0	0	0.71777	5	0	0
Dusp1	0	0	0	0.717354	0	0	0
Shb	0	0	0	0.717165	0	1	0
Cpeb2	0	0	0	0.712569	0	0	0
Tec	0	0	0	0.710528	0	0	0
Gskip	0	0	0	0.710196	0	0	0
Hipk2	0	0	0	0.710187	0	0	0
Specc1	0	0	0	0.709466	0	0	0
Pank1	0	0	0	0.706919	0	1	0
Ttbk1	0	0	0	0.706823	0	0	0
Inpp5b	0	0	0	0.706487	0	0	0
Slc35g1	0	0	0	0.706418	0	0	0
Cpt2	0	2	0	0.706153	0	0	0
Apob	0	0	0	0.702533	0	0	0
Cp	0	0	0	0.699225	0	0	0
Clpx	0	1	0	0.698281	0	0	0
Dgkh	0	0	0	0.696685	0	0	0
Entpd5	0	21	5	0.696667	0	0	0
Casp8	0	0	0	0.693089	0	0	0
Enpp2	0	0	0	0.692646	0	0	0
Cblb	0	0	0	0.691302	0	0	0
S1pr3	0	0	0	0.691199	0	0	0
Zmiz1	0	1	0	0.689219	0	0	0
Zbtb16	0	0	6	0.688997	0	0	0
Cyp2c54	0	0	0	0.688959	0	0	0
Mdm1	0	0	0	0.686625	0	0	0
Ptpn9	0	0	0	0.686339	0	8	0
Tcim	0	0	0	0.685965	0	0	0
F5	0	0	0	0.685474	0	0	0
Trim25	0	0	0	0.684688	0	8	0
Ncoa4	0	0	0	0.68444	0	0	0
Slc25a47	0	0	0	0.684122	0	4	0
Zfp39	0	0	0	0.683553	0	0	0
Glce	0	0	0	0.683034	0	0	0
Ero1lb	0	0	0	0.681433	0	0	0
Bhmt	0	0	0	0.680998	0	0	0
Slc25a32	0	0	0	0.680056	0	0	0
Abhd6	0	0	5	0.678239	0	0	0
Slc13a3	0	0	0	0.677897	0	1	0
Hlf	0	0	0	0.676153	0	0	0
Cdc40	0	0	0	0.676012	0	0	0
Cyp39a1	0	0	0	0.675926	0	0	0
Slc25a33	0	0	0	0.6728	0	1	0
Pctp	0	0	0	0.671215	0	0	0
Rhpn2	0	0	0	0.67042	0	0	0
Notch1	0	0	0	0.669474	0	0	0
Eri2	0	1	0	0.668787	0	0	0
Acsl1	0	0	0	0.668731	0	0	0
Ddhd2	0	0	0	0.666472	0	7	0
Pspc1	0	0	0	0.664718	0	0	0
Bcap31	0	0	0	0.658485	0	0	0
Ddx1	0	0	0	0.657681	0	0	0
Slc16a7	0	0	0	0.657233	0	0	0
Mettl14	0	0	0	0.657137	0	0	0
Arhgef3	0	0	0	0.654776	0	0	0
Tat	0	0	0	0.653291	0	0	0
Stt3a	0	0	0	0.652916	0	0	0
Inhbc	0	0	0	0.652725	0	0	0
Pon2	0	0	0	0.652133	0	0	0
Atoh8	0	0	0	0.650343	0	0	0
Met	0	0	0	0.649768	0	3	0
Tmem67	0	0	0	0.649273	0	2	0
Slc16a2	0	0	0	0.649178	0	0	0
Lims2	0	0	0	0.648485	0	0	0
Srsf4	0	0	0	0.648273	0	0	0
Acsf2	0	0	0	0.64797	0	0	0
Cyp2c23	0	0	0	0.64787	0	0	0
Cpeb4	0	0	0	0.647479	0	0	0
Siae	0	0	0	0.647222	0	0	0
Plscr2	0	0	0	0.645841	0	0	0
Cpsf4l	0	0	0	0.6451	0	0	0
Adap2	0	0	0	0.644017	0	0	0
Sgtb	0	0	0	0.643847	0	0	0
Iqgap2	0	0	0	0.639951	0	0	0
Ceacam1	0	0	0	0.63944	0	0	0
Usp40	0	0	0	0.639315	0	0	0
Hsd17b4	0	0	0	0.638129	0	0	0
Tmx2	0	0	0	0.637976	0	0	0
Prr5	0	0	0	0.637365	0	0	0
Ung	0	0	0	0.636217	0	0	0
Nek2	0	1	0	0.636202	0	0	0
Pim3	0	0	0	0.635958	0	0	0
Pggt1b	0	0	0	0.635638	0	0	0
Slc22a23	0	0	0	0.63532	0	0	0
Syde2	0	0	0	0.634482	0	0	0
Slc38a2	0	0	4	0.633945	0	0	0
Abca6	0	0	0	0.633096	0	0	0
Gm826	0	0	0	0.630967	0	0	0
Sumf1	0	0	0	0.629878	0	0	0
Arl4a	0	0	0	0.629175	0	0	0
Dtx3l	0	6	0	0.628719	0	0	0
Lrrfip2	0	0	0	0.628562	0	0	0
Rab43	0	0	0	0.626957	0	1	0
Osbpl11	0	0	0	0.625806	0	0	0
Tnfaip3	0	0	0	0.624832	0	3	0
Tox	0	0	0	0.624299	0	0	0
Pdgfra	0	0	0	0.623804	0	0	0
Cebpd	0	0	0	0.622883	0	0	0
Arhgef26	0	0	0	0.622016	0	0	0
Cyp2a5	0	0	0	0.621629	0	2	0
Gadd45b	0	0	0	0.62147	0	0	0
Sall1	0	0	0	0.62121	0	0	0
Tmprss2	0	0	0	0.620536	0	2	0
Ugt1a6b	0	0	0	0.618471	0	0	0
Treh	0	0	0	0.617253	0	0	0
Tmem131	0	0	0	0.616837	0	0	0
Klb	0	0	0	0.612523	0	0	0
Rasl11b	0	0	0	0.611965	0	0	0
N4bp2l1	0	0	0	0.611773	0	0	0
Ltv1	0	0	0	0.61164	0	0	0
Pdlim5	0	0	0	0.610902	0	3	0
Bptf	0	0	0	0.610841	0	1	0
Tns1	0	23	0	0.61001	0	0	0
Tnfrsf1b	0	0	0	0.609936	0	0	0
Atf6	0	0	0	0.609497	0	3	0
Serinc3	0	0	0	0.609312	0	0	0
Chd3	0	0	0	0.608748	0	0	0
Pfkfb3	0	5	0	0.608623	0	3	0
Nhlrc1	0	0	0	0.60842	0	0	0
Ptprj	0	0	0	0.608026	0	0	0
Slc16a1	0	0	0	0.607592	0	0	0
Ctsl	0	0	0	0.605842	0	0	0
Gin1	0	0	0	0.605133	0	0	0
Lrrc8c	0	0	0	0.604188	0	0	0
Unc5b	0	0	0	0.603903	0	0	0
Il1rn	0	1	0	0.603353	0	0	0
Pigr	0	0	0	0.602972	0	0	0
Usp9x	0	0	0	0.599791	0	0	0
Snx29	0	2	0	0.599503	0	0	0
Antxr2	0	0	0	0.598106	0	0	0
Sec23a	0	0	0	0.597186	0	0	0
Slc25a22	0	0	0	0.596975	0	0	0
Erap1	0	0	0	0.596766	0	0	0
Slc22a3	0	0	0	0.59675	0	0	0
Cdt1	0	0	0	0.59629	0	0	0
Eif4g1	0	0	0	0.595791	0	0	0
Abcc2	0	0	0	0.594943	0	0	0
Apoh	0	0	0	0.594717	0	0	0
Frat1	0	3	0	0.594257	0	0	0
Spg20	0	0	0	0.593979	0	0	0
Rab27a	0	1	0	0.593673	0	0	0
Ermp1	0	0	0	0.593655	0	0	0
Bcor	0	0	0	0.592069	0	0	0
Mylip	0	0	0	0.591115	0	0	0
Nceh1	0	1	0	0.590734	1	7	0
Grpel2	0	6	0	0.590224	0	0	0
Itgb3	2	0	0	0.59021	0	4	0
Insr	0	1	0	0.590022	0	0	0
Polr2b	0	0	0	0.589192	0	0	0
Epb41	0	0	0	0.588888	0	0	0
Map3k5	0	0	0	0.587873	0	4	0
Fmo2	0	0	0	0.587791	0	5	0
Cipc	0	0	0	0.587768	0	0	0
Cdh2	0	0	0	0.58735	0	0	0
Ulk1	0	0	0	0.586915	0	0	0
Lin7a	0	0	0	0.586264	0	0	0
Hyou1	0	1	0	0.585735	0	0	0
Gm15808	0	2	0	0	0	0	0
Rcor2	0	6	0	0	0	0	0
A730011C13Rik	0	0	0	0	0	0	1
Gm12937	0	0	0	0	1	0	0
Cecr2	0	1	0	0	0	0	0
Gm12833	0	1	0	0	0	0	0
Ccdc30	0	2	0	0	0	0	0
Arpp21	0	0	0	0	0	4	0
Stambpl1	0	0	0	0	0	5	0
Gtf2b	0	1	0	0	0	0	0
D630029K05Rik	0	0	0	0	0	1	0
1500003O03Rik	0	1	0	0	0	0	0
Tmem164	0	0	0	0	0	1	0
Sdc4	0	0	0	0	0	2	0
Letmd1	0	0	0	0	0	3	0
Wdr18	0	0	0	0	9	0	0
Ccdc134	4	4	0	0	0	0	0
Ap3b1	0	3	0	0	0	0	0
6330503K22Rik	0	6	0	0	0	0	0
2810004N23Rik	0	0	0	0	4	0	0
Fam71e1	0	0	0	0	0	1	0
Stx1a	0	1	0	0	0	9	0
Gm7860	0	1	0	0	0	0	0
Zfp810	0	3	0	0	0	0	11
Tra2b	6	0	0	0	0	0	0
Ebf4	0	1	0	0	0	0	0
Ftsjd2	0	3	0	0	0	0	0
Rps12	0	0	4	0	0	0	0
Pank3	0	11	0	0	0	0	0
Sphk2	0	9	0	0	0	0	0
Bcat2	0	8	0	0	0	0	0
Fam89a	0	0	0	0	5	0	0
Nsun5	0	1	0	0	0	0	0
Rnf26	0	1	0	0	0	0	0
2610034B18Rik	1	0	1	0	0	0	0
Itga1	0	0	0	0	0	5	0
Sar1a	0	5	0	0	0	0	0
Tbc1d8	0	0	0	0	0	2	0
Becn1	0	10	0	0	0	0	0
4930479D17Rik	0	0	0	0	0	1	0
Actr1a	0	0	0	0	2	0	9
Gm16335	0	0	0	0	0	1	0
Lclat1	2	12	0	0	0	0	0
Taar1	0	0	1	0	0	0	0
Zfp295	0	0	0	0	0	1	0
Erlec1	0	0	0	0	0	3	0
H3f3a	0	1	0	0	0	0	0
Adrbk1	0	5	0	0	0	5	0
Sf1	0	3	0	0	3	0	0
Slc7a2	0	0	0	0	0	3	1
Tpt1	0	0	0	0	0	6	0
Ina	0	0	0	0	1	0	0
Plekha6	0	0	0	0	0	1	0
B230314M03Rik	0	1	0	0	0	0	0
Zc3h18	0	3	0	0	0	0	0
Gm6467	4	0	0	0	0	0	0
Zfp882	0	0	0	0	0	2	0
Gm11581	0	3	0	0	0	0	0
Krt8	0	3	0	0	0	0	0
Snora36b	0	2	0	0	0	2	0
9230116N13Rik	0	1	0	0	0	1	0
Cd69	0	0	0	0	0	1	0
Gm8444	4	4	0	0	0	0	0
Uba7	0	4	0	0	0	0	0
Efna3	0	0	0	0	0	1	0
Mtus1	0	0	0	0	1	2	2
Kif21a	0	0	0	0	0	1	0
Sec31a	0	2	0	0	0	0	0
Pzp	0	0	0	0	0	2	0
Myo1c	0	4	0	0	0	0	0
Iglv1	0	0	0	0	0	1	0
Gm15032	0	0	0	0	0	1	0
Naa25	0	0	0	0	0	2	0
Nolc1	0	0	0	0	1	0	1
Thumpd3	0	16	0	0	0	0	0
Gm15868	0	6	0	0	0	0	0
3010001F23Rik	0	0	0	0	0	1	0
Gm10290	0	0	0	0	1	0	0
Zc3hc1	0	0	0	0	13	10	0
Gm6543	0	0	0	0	0	1	0
AC102287.1	0	1	0	0	0	0	0
Tbc1d1	0	2	0	0	0	0	0
Gm12340	0	1	0	0	0	0	0
Fut1	0	6	0	0	0	0	0
Trappc8	0	0	0	0	0	1	0
Osbpl7	0	1	0	0	15	0	0
Capza2	0	1	0	0	0	4	0
A630001G21Rik	0	0	0	0	0	8	0
Cldn3	0	0	0	0	0	6	0
2310044H10Rik	0	0	0	0	0	2	0
Nupl1	0	0	0	0	0	5	0
Doc2g	0	0	0	0	0	2	0
Fntb	0	0	0	0	1	0	0
Lactbl1	0	2	0	0	0	0	0
Tacc1	0	4	0	0	0	5	0
Pnoc	0	0	0	0	2	2	0
Aldh2	0	0	0	0	0	5	0
Gbx2	0	6	0	0	0	0	0
4930538K18Rik	0	2	0	0	0	0	0
Ddrgk1	0	2	0	0	0	0	0
Gm13862	0	0	0	0	0	1	0
Plbd2	0	8	0	0	0	0	0
Nfil3	0	0	0	0	0	3	0
Arv1	0	0	0	0	7	0	0
Elp3	0	0	0	0	11	24	3
Slc45a4	0	9	0	0	0	0	0
Gm14547	0	0	0	0	0	1	0
Gm11517	0	0	0	0	6	0	0
Ubl3	2	0	0	0	0	0	0
Dpm3	0	0	0	0	0	1	0
Tpm4	0	0	0	0	0	6	0
2810442I21Rik	0	0	0	0	0	5	0
1110008J03Rik	0	1	0	0	0	0	0
Zfp963	0	1	0	0	0	0	0
Rhbdl1	0	4	0	0	1	1	0
Gm8385	0	4	2	0	0	0	0
Relb	0	0	2	0	0	0	0
2310022A10Rik	0	0	0	0	0	20	0
Tfap2a	0	0	0	0	0	1	0
Lpar5	0	0	0	0	0	5	0
Mir99b	0	0	0	0	0	1	0
Gsx1	0	0	0	0	0	1	0
Naglu	0	14	0	0	0	0	0
Cntn2	0	0	0	0	0	2	0
Taf11	0	2	0	0	0	0	0
Golm1	0	5	0	0	0	0	0
Gm12404	0	0	0	0	0	8	4
Bax	0	8	0	0	0	0	0
Vil1	0	3	0	0	0	0	0
Zfp119a	0	2	0	0	0	0	0
Pif1	0	6	0	0	0	0	0
Fam83e	0	6	0	0	0	0	0
Tmem50a	0	0	0	0	0	1	0
Nfe2l3	2	0	0	0	0	1	0
9130019P16Rik	0	1	0	0	0	0	0
Solh	0	2	0	0	0	0	0
Coasy	0	10	0	0	0	0	0
Tfip11	0	0	0	0	0	1	0
Taf8	0	2	0	0	0	16	0
Tmem48	0	1	0	0	0	0	0
Nbeal1	0	0	0	0	0	1	0
Zfp27	0	0	0	0	1	0	0
Clspn	0	0	0	0	4	0	0
N6amt1	0	2	0	0	0	0	0
Tsga13	0	0	0	0	1	0	0
Pppde2	4	4	0	0	0	0	0
Hmbs	0	2	0	0	0	0	0
Ppcs	0	2	0	0	0	0	0
2500002B13Rik	0	0	0	0	0	3	0
1200011I18Rik	0	0	0	0	0	1	0
Zbp1	0	7	0	0	0	0	0
Trim35	0	0	0	0	3	7	1
Setd8	0	4	0	0	0	6	0
Nt5c3l	0	1	0	0	0	0	0
Gm6635	0	0	0	0	0	2	0
Ifit3	0	0	0	0	0	3	0
Aen	0	13	0	0	0	0	0
Tcp11l2	0	13	0	0	0	0	0
Ifi35	0	9	0	0	0	0	0
Gdap1l1	0	0	0	0	0	2	0
Gm12786	0	2	0	0	0	0	0
Dhx30	0	0	0	0	1	0	0
Golga5	0	0	0	0	0	1	0
SNORA63	0	0	0	0	0	1	0
Pgm1	0	2	0	0	0	0	0
Nudt8	0	0	0	0	0	1	0
Mir3113	0	0	0	0	0	1	0
Dhx58	0	2	0	0	0	0	0
Ctdsp1	0	9	0	0	0	0	0
Rpl7a	0	0	3	0	0	0	0
Znrf4	0	4	0	0	0	0	0
Ass1	0	0	0	0	1	0	0
Hdgfrp2	0	6	0	0	0	0	0
Dpf1	0	0	0	0	7	0	0
Gm12445	0	1	0	0	0	0	0
Rnf123	0	4	0	0	0	0	0
Usp18	0	7	0	0	0	0	0
Gm16318	0	0	0	0	0	1	0
Fhl4	0	10	0	0	0	0	0
Pdgfrl	0	0	0	0	1	1	0
Sspn	1	0	0	0	0	0	0
Cspg5	0	0	0	0	3	0	0
Gm15798	0	0	0	0	0	3	0
Fam117b	0	1	0	0	0	0	0
Gm17454	0	0	0	0	0	1	0
Tbc1d10c	0	1	0	0	0	13	0
Gm10343	0	2	0	0	0	0	0
Rpl9	0	0	0	0	0	1	0
Gm17364	0	0	0	0	0	2	0
SNORA36	0	1	0	0	0	0	0
Timm23	0	0	0	0	0	1	0
Tmem221	0	0	0	0	0	2	0
Pter	0	0	0	0	0	1	0
Gm15310	0	0	0	0	0	2	0
Tulp2	0	8	0	0	0	0	0
Ehd1	0	3	0	0	2	0	0
Ulk3	0	0	0	0	0	2	0
Gm5617	0	0	4	0	0	0	0
Fggy	0	0	0	0	0	1	0
Prdm12	0	0	0	0	1	0	0
Mgrn1	0	2	0	0	0	0	0
Plxnb1	0	0	0	0	2	0	0
Mgp	0	0	0	0	0	2	0
1810064F22Rik	0	0	0	0	0	0	1
Tmcc2	0	10	0	0	0	2	0
1700102P08Rik	0	3	0	0	0	0	0
5430416O09Rik	0	1	0	0	0	0	0
Adcy1	0	0	0	0	0	2	0
Irf3	0	3	0	0	0	0	0
Tmem136	0	1	0	0	0	0	0
Slc30a10	0	8	0	0	0	5	0
Rnf126	0	0	0	0	12	0	0
Gm12838	0	1	0	0	0	0	0
Herc3	0	0	0	0	0	7	0
Pygl	0	1	0	0	0	0	0
Anapc16	0	0	0	0	19	0	0
Tpbg	0	0	0	0	0	0	4
Armc9	0	0	0	0	0	3	0
1110021L09Rik	0	0	4	0	0	0	0
Clic4	0	0	0	0	0	1	0
Nup107	0	0	0	0	0	1	0
Gm11475	3	0	0	0	0	0	0
Fgfrl1	0	1	0	0	0	0	0
Gm13466	0	0	0	0	0	2	0
2810459M11Rik	0	0	0	0	0	11	0
Nap1l5	0	0	0	0	0	13	0
2900026A02Rik	0	0	0	0	0	10	0
Neil1	0	0	0	0	0	7	0
Papolb	0	0	0	0	0	4	0
Sil1	0	0	2	0	0	2	0
Ndufv3	0	0	0	0	0	2	0
Dcbld2	0	1	0	0	0	0	0
Gcc1	0	0	0	0	0	5	0
Gm13441	0	0	0	0	1	0	0
Msto1	0	0	0	0	0	1	0
Gm10702	0	0	0	0	0	1	0
Ceacam16	0	0	1	0	0	0	0
4933400A11Rik	0	0	0	0	4	3	2
Gm17480	0	2	0	0	0	0	0
0610037P05Rik	0	11	0	0	0	0	0
Cpxm1	0	4	0	0	0	0	0
E130012A19Rik	0	2	0	0	0	0	0
Snx11	0	0	0	0	12	0	0
Lhfpl2	0	8	0	0	0	0	0
Xpnpep3	1	1	0	0	0	0	0
Fam161a	1	0	0	0	0	0	0
Mettl11a	0	9	0	0	0	0	0
Ifi44	0	0	0	0	0	1	0
Krt1	0	2	0	0	0	0	0
Slc6a19	0	1	0	0	0	0	0
Eif2c4	0	0	0	0	3	0	0
Gm11635	0	1	0	0	0	0	0
Rap1b	0	0	0	0	0	1	0
Arhgdib	0	0	0	0	0	4	0
Copz2	0	0	0	0	11	0	0
Abcg5	0	0	0	0	0	3	0
Bdnf	1	0	0	0	0	0	0
Mum1	0	0	0	0	10	0	0
Rgp1	0	17	0	0	0	0	0
Gm12447	0	2	0	0	0	0	0
Comp	0	1	0	0	0	0	0
Fcho2	0	0	0	0	0	3	0
Gm8152	0	1	0	0	0	0	0
SNORA77	0	0	0	0	4	1	0
Npffr1	0	1	0	0	0	0	0
Trmt2a	0	0	0	0	12	5	0
Gm6565	0	0	0	0	0	3	0
Cxcl1	0	0	0	0	0	1	0
Ddx54	0	1	0	0	0	0	0
Gm16161	0	5	0	0	0	0	0
Tpm3	0	0	0	0	0	1	0
Alkbh3	0	0	0	0	0	1	0
Rad9b	1	0	0	0	0	2	0
Thada	0	0	0	0	0	5	0
Hip1	0	2	0	0	0	0	0
1700014D04Rik	0	1	0	0	0	0	0
Chchd5	0	0	0	0	0	4	0
Mir302b	0	0	0	0	0	1	0
Chrna7	0	0	1	0	0	0	0
1700052N19Rik	0	0	0	0	0	1	0
Gmfb	0	0	0	0	0	1	0
Ubap1	0	1	0	0	0	18	11
Pik3cg	0	0	0	0	0	15	0
Gm17092	0	2	0	0	0	0	0
Gpr18	0	2	0	0	0	0	0
Gm14210	0	1	0	0	0	1	0
Edc3	0	0	0	0	0	1	0
Fam149b	0	0	0	0	0	2	0
Cnfn	0	1	0	0	0	0	0
Trcg1	0	0	0	0	0	3	0
Ubap2	0	1	0	0	0	18	9
Mt3	0	0	0	0	4	0	0
Gm4943	3	0	0	0	0	0	0
Gm15898	0	1	0	0	0	0	0
Gm15994	0	0	0	0	0	2	0
9130230N09Rik	0	0	0	0	0	1	0
Cox4i1	0	7	0	0	0	0	0
1700069B07Rik	0	1	0	0	0	0	0
Cpne9	0	10	0	0	0	0	0
Dhdh	0	9	0	0	0	0	0
Tmem81	0	0	0	0	0	3	0
Rpl14	0	8	0	0	0	0	0
Gm17388	0	2	0	0	0	0	0
Tsks	0	5	0	0	0	0	0
AI661453	0	0	0	0	0	5	0
Gm10390	0	5	0	0	0	0	0
Med8	0	1	0	0	0	1	0
Ppp6r3	0	1	0	0	0	0	0
Fam73a	0	0	0	0	0	5	0
Fbxo41	0	1	0	0	0	0	0
Fam125a	0	0	0	0	0	6	0
2810468N07Rik	0	1	0	0	0	1	0
Nhsl1	0	0	0	0	0	7	0
Apbb2	0	0	0	0	0	5	0
B3gnt2	1	0	0	0	0	2	0
Mir3098	0	0	0	0	0	4	0
Ehd2	0	0	0	0	0	10	0
Ccdc28a	0	0	0	0	0	9	0
Nfkbiz	0	0	0	0	0	2	0
Coq6	0	16	5	0	0	0	0
Ica1	0	0	1	0	0	0	0
Gm15567	0	0	0	0	0	8	0
Rexo2	0	0	5	0	0	0	0
Ceacam19	0	0	1	0	0	0	0
Qars	0	1	0	0	3	0	0
Mrpl10	0	1	0	0	13	0	0
Myo18b	0	0	0	0	0	2	0
Phb2	0	4	3	0	0	0	0
Susd4	0	1	0	0	0	0	0
Gm10355	0	3	0	0	0	0	0
4933427D14Rik	0	3	0	0	0	11	0
Cacna1b	0	1	0	0	0	0	0
Cd209d	0	2	0	0	0	0	0
Wdfy4	0	2	0	0	0	0	0
Ada	0	0	0	0	0	1	0
Gm17138	0	0	5	0	0	0	0
9130020K20Rik	0	2	0	0	0	0	0
Egln1	0	0	0	0	3	0	0
BC048546	0	0	0	0	0	1	0
Svopl	0	0	0	0	0	8	0
Baz1b	0	0	0	0	0	5	0
Xpc	0	4	0	0	0	0	0
Gm14486	0	2	0	0	0	0	0
Slc18a2	0	0	0	0	1	0	0
2810417H13Rik	0	4	0	0	0	1	2
Tubd1	0	0	0	0	0	7	0
Bace2	0	0	0	0	0	1	0
Accn2	0	0	0	0	0	1	0
1810008A18Rik	0	0	0	0	0	4	0
Prr15	0	2	0	0	0	1	0
Ptdss1	1	0	0	0	0	0	0
Tmx1	0	7	0	0	0	0	0
Nfia	0	0	0	0	0	3	0
Frmd6	0	7	0	0	0	0	0
Tmbim1	0	12	0	0	0	0	0
Gm16740	0	0	0	0	0	0	1
Vmn1r43	0	1	0	0	0	0	0
Cldn19	0	1	0	0	0	0	0
Gm12251	0	0	0	0	0	2	0
Cdc7	0	1	0	0	0	0	0
Gm17022	0	0	0	0	0	1	0
Fyco1	0	0	0	0	0	1	0
Slc38a1	0	0	4	0	0	0	0
Coq7	0	1	0	0	0	1	0
Sdhc	0	0	0	0	0	1	0
Fam92b	0	5	0	0	0	0	0
Cd209a	0	2	0	0	0	0	0
Casp7	0	0	0	0	0	2	0
Kdm5c	0	0	0	0	0	2	0
Crkl	0	0	0	0	0	2	0
Rps6kb2	0	1	0	0	0	6	0
Tomm6	0	2	0	0	0	16	0
Klrb1a	0	0	0	0	0	3	0
Gm13408	0	0	0	0	0	1	0
Gm15467	0	0	0	0	0	6	0
Ctnnbl1	1	9	0	0	0	0	0
Nicn1	0	4	0	0	2	0	0
Slc26a2	0	4	0	0	0	0	0
Six4	0	2	0	0	1	0	0
6330527O06Rik	0	1	0	0	0	1	0
Gm20479	0	0	0	0	0	16	0
Tmem9b	0	0	0	0	0	1	0
4933401P06Rik	0	0	0	0	4	0	0
Tdrd7	0	0	0	0	0	1	0
Mll2	0	2	0	0	0	0	0
Aarsd1	0	10	0	0	0	0	0
Atp2a2	1	0	0	0	0	2	0
Yy1	0	0	0	0	0	5	0
Ing4	0	0	0	0	0	4	0
Tmem213	0	0	0	0	0	5	0
Rab5c	0	5	0	0	0	0	0
Zfp512	0	0	0	0	0	6	0
Psmc2	0	0	0	0	0	2	0
4930447C04Rik	0	1	0	0	0	0	0
Rbm38	0	26	0	0	0	0	0
Gm12124	0	3	0	0	0	0	0
Slc2a1	0	2	0	0	0	0	0
Pgm2l1	0	0	0	0	0	2	0
Ier5l	0	1	0	0	0	0	0
Gm9154	0	0	0	0	0	0	3
Zfp395	0	0	0	0	7	16	1
Aip	0	2	0	0	0	5	0
Zfp455	1	0	0	0	0	0	0
G6pc	0	4	0	0	0	0	0
Coch	0	1	0	0	0	0	0
1110008P14Rik	0	0	0	0	1	0	0
Ccl19	0	0	0	0	0	1	1
2610528E23Rik	0	0	0	0	0	1	0
Pprc1	0	0	0	0	1	0	1
Gtf3c2	0	0	0	0	0	1	0
Tmem115	0	1	0	0	0	0	0
Tspan10	0	1	0	0	0	0	0
Gm12200	0	1	0	0	0	0	0
Gm13388	0	0	0	0	0	1	0
Scrg1	0	0	0	0	0	2	0
Sec13	0	5	0	0	0	0	0
Gm3571	0	0	0	0	0	1	0
Pold1	0	0	0	0	0	1	0
Klrb1f	0	0	0	0	0	9	0
0610011L14Rik	1	0	0	0	0	0	0
Gm15283	0	1	0	0	0	0	0
Tmem173	0	0	0	0	0	2	0
R3hdm1	0	0	0	0	0	5	0
Gm13863	0	0	0	0	0	3	0
Barx1	0	2	0	0	0	0	0
Safb	0	1	0	0	0	0	0
5730437N04Rik	0	0	0	0	1	20	0
Smarca4	0	6	0	0	0	0	2
Gm16845	0	5	0	0	0	0	1
BC064078	0	0	0	0	0	14	0
Gm16626	0	1	0	0	0	0	0
Cox4nb	0	2	0	0	0	0	0
Smu1	0	1	0	0	0	0	0
Gem	0	0	0	0	0	2	0
Ifnar1	0	4	0	0	0	0	0
Gm15613	0	0	0	0	2	0	0
Gm12834	0	1	0	0	0	0	0
Uap1	0	0	0	0	0	1	0
Gpr157	0	0	0	0	0	2	0
Gm11661	0	0	0	0	0	1	0
1700011J10Rik	0	1	0	0	0	0	0
Serpina1e	0	1	0	0	0	0	0
Rbpms2	0	10	0	0	0	0	0
Rbm12b	0	0	0	0	0	1	0
Pcgf3	0	1	0	0	0	0	0
Fut2	0	3	0	0	0	0	0
A730085K08Rik	0	1	0	0	0	0	0
Rpn2	7	0	0	0	0	0	0
Cyb5d2	0	1	0	0	0	0	0
Gm17383	0	1	0	0	0	0	0
Cops7a	0	2	1	0	0	6	0
Gm9311	0	4	0	0	0	0	0
Cttn	0	3	0	0	0	0	0
C1s	0	3	2	0	0	0	0
4930554H23Rik	0	0	3	0	0	0	0
Cog6	0	1	0	0	0	0	0
Mthfd2l	0	0	0	0	0	2	0
App	0	2	0	0	0	0	0
Actn4	0	0	0	0	3	0	0
Chn2	0	2	0	0	0	2	0
Gm12082	0	0	0	0	0	1	0
Crybb2	0	0	0	0	0	2	0
Xab2	0	4	0	0	0	0	0
Faah	2	0	0	0	0	0	0
Ldlr	0	9	0	0	0	0	2
Dgkz	0	0	0	0	1	0	0
4930544O15Rik	2	2	0	0	0	0	0
Gm13372	0	2	0	0	0	0	0
T	0	0	0	0	0	1	0
Myo10	0	0	0	0	0	17	0
Tmed2	0	4	0	0	0	6	0
Nr5a2	0	0	0	0	0	4	0
Dgat2	0	2	0	0	0	0	0
Trim8	0	0	0	0	2	0	9
Oxtr	0	1	0	0	0	0	0
Dbr1	0	6	0	0	0	0	0
Fuk	0	2	0	0	0	0	0
Zmynd12	0	2	0	0	0	0	0
Upk2	0	1	0	0	0	0	0
Grm4	0	2	0	0	0	0	0
1110001J03Rik	0	0	0	0	0	2	0
Jarid2	0	0	0	0	0	9	0
Cldn13	0	0	0	0	0	3	0
Map4k1	0	0	0	0	1	0	0
Polr3b	0	10	0	0	0	0	0
Lcor	0	1	0	0	0	0	0
Gm14234	0	0	0	0	0	3	0
Gm16005	0	1	0	0	0	0	0
Tsc22d1	0	0	0	0	0	3	0
Slc45a1	0	0	0	0	0	2	0
SNORD58	0	2	0	0	0	0	0
A630007B06Rik	0	0	0	0	0	2	0
Numbl	0	0	0	0	0	32	0
Gm13196	0	0	0	0	1	0	0
Tmed8	0	0	14	0	0	0	0
Dus4l	2	0	0	0	0	10	0
Btbd16	0	2	0	0	6	0	0
Calcb	0	0	0	0	0	2	0
2310037I24Rik	0	2	0	0	0	0	0
Spred2	0	3	0	0	0	0	0
Gnptg	0	2	0	0	0	1	0
Epgn	0	0	0	0	0	1	0
Zfp334	0	0	0	0	0	1	0
Tmem106a	0	2	0	0	0	0	0
Prodh	0	0	0	0	11	1	0
Pex5	0	7	5	0	0	0	0
B430306N03Rik	0	0	0	0	0	1	0
Rnf149	0	0	0	0	0	2	0
Gm11665	2	0	0	0	0	0	0
Dhx57	0	0	0	0	0	1	0
Cog7	0	2	0	0	0	0	0
Gm14211	0	1	0	0	0	1	0
Tex21	0	0	0	0	5	0	0
Kcne1	0	0	0	0	0	2	0
Gm6476	0	0	0	0	0	2	0
Ephb2	0	15	0	0	4	0	0
Memo1	0	0	0	0	0	2	0
Lpcat2b	0	1	0	0	0	0	0
Rgl1	0	1	0	0	0	0	0
Tbx3	0	3	0	0	0	0	0
Mtpap	0	0	0	0	0	9	0
Slc13a1	0	0	0	0	4	0	0
Ripply3	0	0	0	0	0	2	0
Brpf1	0	19	0	0	0	0	0
Snx20	0	4	0	0	0	0	0
Mex3d	0	0	0	0	3	0	0
Pex7	0	0	0	0	0	5	0
Slco2b1	0	0	0	0	0	2	0
2810432D09Rik	0	0	0	0	0	27	14
Chmp5	0	1	0	0	0	2	2
4930548H24Rik	0	0	0	0	0	5	0
Arl6ip1	0	0	0	0	0	1	0
Tpi1	0	3	2	0	0	0	0
Zfp119b	0	6	0	0	0	0	0
Tmem119	0	0	0	0	0	9	0
Scaf1	0	3	0	0	0	0	0
Gm12059	0	0	0	0	0	1	0
1190002H23Rik	0	0	0	0	0	1	0
0610011F06Rik	0	2	0	0	1	1	0
Gnai1	0	0	2	0	0	0	0
Thumpd1	0	2	0	0	0	0	0
Ccdc84	0	1	0	0	0	0	0
4933428G20Rik	0	1	0	0	0	0	0
Cpt1c	0	0	0	0	0	1	0
Copg2	0	0	0	0	16	1	0
Gm7211	0	0	2	0	0	0	0
Tmem231	0	2	0	0	0	0	0
Adamts2	0	8	0	0	0	0	0
Tmem143	0	3	0	0	0	0	0
Pdzd3	0	1	0	0	0	0	0
Zfp759	1	0	0	0	0	0	0
Snord15b	0	0	0	0	0	1	0
9630028B13Rik	0	1	0	0	0	3	0
Yes1	0	0	0	0	2	0	0
Gpr155	0	1	0	0	0	0	0
Psat1	0	0	0	0	0	5	0
B230217C12Rik	0	4	0	0	0	0	0
Wars	0	0	0	0	0	5	0
Ube2r2	0	1	0	0	0	7	4
Sobp	0	0	0	0	0	3	0
Gm13034	0	2	0	0	0	0	0
Creb3	0	17	0	0	0	0	0
2200002D01Rik	0	0	0	0	7	0	0
2010107E04Rik	0	1	0	0	0	0	0
Fbxl15	0	0	0	0	1	0	7
Nop56	0	4	0	0	0	0	0
C2cd2	0	0	0	0	0	1	0
Enoph1	0	9	0	0	0	0	0
AA415398	0	2	0	0	0	0	0
Gm12199	0	2	0	0	0	0	0
Dkkl1	0	6	0	0	0	0	0
Gm12576	0	0	0	0	0	2	0
Dhx40	0	0	0	0	0	19	0
Mrps22	0	0	0	0	26	12	0
Gm5602	0	1	0	0	2	0	0
4930524J08Rik	0	8	0	0	0	0	0
Ctbp1	0	2	0	0	0	0	0
1200014J11Rik	0	1	0	0	0	0	0
Phtf2	0	0	0	0	1	1	0
Dgke	0	0	0	0	0	3	0
1700019B03Rik	0	2	0	0	0	0	0
Zfp526	0	1	0	0	0	0	0
Aldh1l2	0	0	0	0	0	0	2
Pnp	0	0	0	0	3	0	0
Rs1	0	0	0	0	0	0	1
Eml1	0	1	0	0	0	2	0
Cdc34	0	0	0	0	9	0	0
Aspn	0	1	0	0	0	0	0
Zbtb25	0	0	0	0	8	0	0
Msi2	0	0	0	0	0	20	0
Gm16866	0	0	0	0	1	0	0
Mir378b	0	0	0	0	0	2	0
Has1	0	0	0	0	0	2	0
Eno1	0	0	0	0	0	5	0
Gm17447	0	4	0	0	0	0	0
Pja2	0	0	0	0	0	3	0
Heatr8	0	2	0	0	0	0	0
1190005F20Rik	0	4	0	0	0	1	0
1700001P01Rik	0	1	0	0	0	0	0
Snap29	0	0	0	0	0	2	0
Adam32	0	2	0	0	0	0	0
Cse1l	0	1	0	0	0	0	0
Gm17596	0	0	0	0	0	1	0
Treml2	0	0	0	0	0	1	0
Rps19bp1	0	3	0	0	0	0	0
Slc35c2	0	0	0	0	0	1	0
Galntl1	0	0	0	0	6	0	0
Foxm1	0	0	0	0	0	12	0
Igfbp6	0	2	0	0	0	0	0
Arhgap10	0	2	0	0	0	0	0
Impdh2	0	1	0	0	3	0	0
Artn	0	1	0	0	0	0	0
Creld1	0	14	0	0	0	0	0
Ssh3	0	2	0	0	0	15	0
Gm14279	0	1	0	0	0	0	0
Cyp20a1	0	2	0	0	0	0	0
Gm7638	0	2	0	0	0	0	0
Dnajb12	0	0	0	0	19	0	0
BC024978	0	0	0	0	0	40	0
Ficd	0	0	0	0	0	14	0
Nup214	0	0	0	0	6	0	0
Ubiad1	0	0	0	0	6	0	0
Atp2c1	0	0	0	0	0	1	0
Clstn3	0	7	5	0	0	0	0
Gm4167	0	0	0	0	25	20	19
Maged1	0	7	0	0	0	0	0
Stip1	0	5	0	0	0	0	0
Gm12443	0	1	0	0	0	0	0
SNORA44	0	1	0	0	0	0	0
Evi2a	0	0	0	0	0	1	0
Rnase11	0	0	0	0	1	0	0
Ccl27a	0	0	0	0	0	26	14
AC151602.1	0	4	0	0	0	0	0
Pou2f2	0	2	0	0	0	0	0
Snx10	1	0	0	0	0	0	0
Gm14321	4	0	0	0	0	0	0
Pm20d1	0	4	0	0	0	0	0
Cubn	0	0	0	0	0	4	0
Shq1	0	0	0	0	0	6	0
Gpx1	0	4	0	0	0	0	0
Mbd2	0	0	0	0	0	2	0
Car2	0	9	0	0	0	0	0
Smc5	0	0	0	0	0	3	0
BC006965	0	0	0	0	0	2	0
SNORA8	0	6	0	0	0	0	0
Wnk4	0	13	0	0	0	0	0
2410003L11Rik	0	2	0	0	0	0	0
Htr3b	0	0	1	0	0	0	0
Pwp1	0	0	0	0	1	0	0
Gpbar1	0	9	0	0	0	0	0
Klhdc8a	0	8	0	0	0	1	0
Erc1	0	2	0	0	0	0	0
Sema3c	0	0	3	0	0	0	0
Dync2li1	0	0	0	0	0	5	0
Gm11465	0	3	0	0	0	0	0
1500011H22Rik	1	0	0	0	0	2	0
Fmo5	0	5	0	0	0	0	0
Il2rb	0	0	0	0	0	5	0
Gm13448	0	0	0	0	0	5	0
Fam123a	0	0	0	0	0	3	0
Csf2rb	0	0	0	0	0	7	0
Mrps23	0	0	0	0	0	1	0
Fgf13	0	0	0	0	3	0	0
Gm15270	0	0	0	0	1	0	0
Gm16073	0	8	0	0	0	0	1
Tep1	0	0	0	0	6	0	0
Gm10451	0	0	0	0	6	0	0
Gm16908	0	3	0	0	0	0	0
Igf2bp2	7	0	0	0	0	0	0
Gm5531	0	6	6	0	0	0	0
Fam161b	0	9	2	0	0	0	0
Gm15585	0	0	0	0	0	1	0
BC017612	0	5	0	0	0	0	0
Slc8a2	0	0	0	0	0	10	0
Nudt14	0	0	0	0	0	11	0
Gsr	0	0	0	0	0	0	4
Rps6ka4	0	2	0	0	0	0	0
Gm20456	0	0	0	0	0	1	0
Irx5	0	1	0	0	0	0	0
Rab1	0	1	0	0	0	0	0
Lrpprc	0	0	0	0	0	7	0
Rac2	0	0	0	0	0	8	0
Tob2	5	5	0	0	0	0	0
Tmem30b	0	5	0	0	2	0	0
4930566F21Rik	0	0	0	0	0	1	0
Thap4	0	0	0	0	0	2	0
Rad17	0	0	0	0	0	1	0
Eif4e3	0	0	0	0	0	5	0
Arl6ip4	0	2	0	0	0	4	0
Slc6a18	0	1	0	0	0	0	0
Crym	0	1	0	0	0	0	0
Fastkd5	0	2	0	0	0	0	0
2400009B08Rik	0	3	0	0	0	0	0
Mir342	0	0	0	0	0	1	0
Vim	0	0	0	0	0	9	0
Fam129c	0	0	0	0	0	5	0
Galr1	0	1	0	0	0	0	0
Dgcr2	0	0	0	0	5	1	0
Ccdc38	0	0	0	0	1	3	0
Tnfrsf1a	0	0	0	0	0	16	0
Efna4	0	0	0	0	0	1	0
Lrp8	0	2	0	0	0	0	0
AU022252	0	2	0	0	0	0	0
Aars	0	4	0	0	0	0	0
Hunk	0	0	0	0	0	1	0
Rell1	0	1	0	0	0	0	0
Gm9885	0	1	0	0	0	0	0
Arl6ip6	0	0	0	0	0	1	0
Gfm2	0	0	0	0	0	2	0
Gemin6	0	0	0	0	0	1	0
Nkx6	0	4	0	0	0	0	0
Ptpn1	7	0	0	0	0	0	0
Gm12942	0	0	0	0	0	1	0
Tssk6	0	1	0	0	0	0	0
4921513D23Rik	0	11	0	0	0	0	0
Tgfbr3	0	1	0	0	0	0	0
Lrrc27	0	2	0	0	0	0	0
Stk38	0	6	0	0	0	1	0
Mrpl46	0	13	0	0	0	0	0
Pdxdc1	0	1	0	0	0	0	0
Gm15946	1	2	0	0	0	0	0
Slc22a2	0	2	0	0	0	0	0
Ogdhl	0	0	0	0	0	1	0
Cnih2	0	1	0	0	0	0	0
Spryd3	0	3	0	0	0	0	0
Best3	0	0	0	0	0	1	0
Fkbp10	0	1	0	0	0	0	0
Prdm11	0	0	0	0	1	0	0
Pfdn4	0	0	0	0	0	12	0
Wfs1	0	0	0	0	4	0	0
Exd2	0	0	0	0	6	0	0
Gnpat	0	0	0	0	6	0	0
Mapk14	0	3	0	0	0	1	0
BC013529	0	0	0	0	0	2	0
Stub1	0	5	0	0	0	1	0
Tuba3a	0	0	0	0	0	7	0
Gm15706	1	0	0	0	0	0	0
Dlgap4	4	0	0	0	0	0	0
Phka2	0	0	0	0	0	0	1
Phf2	0	13	0	0	0	0	0
Rilpl2	0	4	0	0	0	6	0
Bpgm	0	0	0	0	0	11	0
Gba	0	0	0	0	0	1	0
Dazap1	0	0	0	0	11	0	0
Amdhd1	0	0	0	0	0	2	0
Mir5103	0	0	0	0	0	3	0
2010001M09Rik	0	0	2	0	0	2	0
Ptp4a1	0	1	0	0	0	0	0
Atg4b	0	0	0	0	0	2	0
Mtss1l	0	1	0	0	0	0	0
C1qc	0	13	0	0	5	0	0
Kcnu1	0	0	0	0	0	1	0
Psen1	0	11	5	0	0	0	0
2900060B14Rik	0	1	0	0	0	0	0
Creb5	0	2	0	0	0	0	0
Ppp1cb	0	0	0	0	2	0	0
Qrich1	0	2	0	0	2	0	0
4932430I15Rik	0	0	0	0	0	1	0
Wdr6	0	1	0	0	3	0	0
n	0	6	0	0	1	3	0
Gm6166	0	0	0	0	0	6	0
Zbtb42	0	0	0	0	0	8	0
Gpn3	1	0	0	0	0	2	0
Tmem191c	0	0	0	0	0	2	0
Psma1	0	0	0	0	0	24	0
Ostb	0	2	0	0	0	0	0
Mrps26	0	3	0	0	0	0	0
Ablim3	0	1	0	0	0	0	0
Apeh	0	3	0	0	0	0	0
Ndufv1	0	6	0	0	0	5	0
Nbeal2	0	0	0	0	1	0	0
Ckap4	0	11	0	0	0	0	0
Blvrb	0	0	0	0	0	38	0
Pi16	0	4	0	0	0	1	0
Cab39	0	0	0	0	0	9	0
Erbb2ip	0	0	0	0	0	1	0
Hist1h4n	0	0	0	0	0	1	0
Btbd8	0	1	0	0	0	0	0
Setdb1	0	0	0	0	0	0	1
Gm11578	0	2	0	0	0	0	0
Scyl1	0	2	0	0	1	0	0
Gm15639	0	0	0	0	0	1	0
Rab8b	0	0	0	0	0	1	0
Pdhb	0	0	5	0	0	0	0
C330002G04Rik	0	0	0	0	0	1	0
Pdcd7	0	4	0	0	0	0	0
Ppp1r15b	0	0	0	0	0	1	0
Nsun7	0	0	0	0	0	2	0
Spnb1	0	0	0	0	2	0	0
Radil	0	0	0	0	0	6	0
Ramp2	0	15	0	0	0	0	0
Akr1b8	0	0	0	0	0	8	0
Anxa7	0	0	0	0	0	2	0
Gm15420	0	1	0	0	0	0	0
Isca1	0	11	0	0	0	0	0
Fen1	0	4	0	0	0	0	0
Gm16517	0	0	0	0	4	0	0
Copb1	0	0	0	0	0	14	0
Mia1	0	0	0	0	0	32	0
Ing5	0	0	0	0	0	1	0
Chchd4	0	5	0	0	0	0	0
Gm12940	0	0	0	0	1	0	0
Mx1	0	0	0	0	0	2	0
Gm12401	0	1	0	0	0	0	0
AL672259.1	1	3	0	0	0	0	0
SNORA1	0	2	0	0	0	0	0
Matn4	0	0	0	0	0	1	0
2310003H01Rik	0	2	0	0	0	0	0
Kcnj16	0	0	0	0	0	1	0
Apoo	0	6	0	0	0	0	0
Fam18a	0	0	0	0	0	2	0
Tlr8	0	0	0	0	0	4	0
Mpst	0	0	0	0	0	7	0
Nagpa	0	4	0	0	0	0	0
SNORA32	0	0	0	0	0	1	1
Zeb2	0	0	0	0	0	1	0
1700012A16Rik	0	3	3	0	0	0	0
Cav1	0	0	0	0	0	4	0
9030612E09Rik	0	0	0	0	0	2	0
Gm16731	0	3	0	0	0	0	0
Gm5879	0	0	0	0	0	2	0
Otub1	0	8	0	0	0	0	0
Tsen15	0	2	0	0	0	0	0
Gm17673	0	7	4	0	0	0	0
Dynlrb2	3	0	0	0	0	0	0
Mcoln1	0	4	0	0	0	0	0
Zfp64	0	0	0	0	0	4	0
H2afx	0	1	0	0	0	0	0
1110049F12Rik	0	1	0	0	0	0	0
1700012C14Rik	0	0	0	0	2	0	0
Ccnb1ip1	0	0	0	0	3	0	0
SNORA76	0	1	0	0	0	0	0
Gm15499	1	0	0	0	0	0	0
Cldn1	0	0	0	0	0	2	0
Acat3	1	5	0	0	0	0	0
Ruvbl2	0	9	0	0	0	0	0
Sfpq	0	0	0	0	1	1	0
Ms4a6c	0	0	0	0	0	3	0
Fam89b	0	1	0	0	1	0	0
C230096C10Rik	0	0	0	0	0	7	0
Ccdc125	0	0	0	0	0	1	0
Pir	0	0	0	0	0	1	0
Fam33a	0	0	0	0	0	16	0
Rbm17	0	5	0	0	0	4	0
Tubgcp3	0	0	0	0	0	1	0
Dpm1	1	0	0	0	2	25	0
Eif3d	0	0	0	0	0	4	0
Cyyr1	0	1	0	0	0	0	0
Slc5a8	0	2	0	0	0	0	0
Dio3	0	1	0	0	0	0	0
Gm1568	0	0	0	0	2	0	0
Wdr92	0	0	0	0	0	8	0
Snora33	0	0	1	0	0	0	0
Dock4	0	0	0	0	0	3	0
Med25	0	0	0	0	0	1	0
Gm12338	0	3	0	0	0	0	0
1600029I14Rik	0	4	0	0	0	0	0
5830418K08Rik	0	4	0	0	0	0	0
Gm12959	0	1	0	0	0	0	0
Fam101b	0	3	0	0	0	0	0
Mthfd1	0	0	0	0	7	0	0
Epor	0	9	0	0	0	0	3
4930430J20Rik	0	1	0	0	0	0	0
Fancd2	0	14	0	0	0	0	0
Mrps36	0	0	0	0	0	1	0
Stk25	0	0	0	0	0	2	0
1810006K21Rik	0	4	0	0	0	0	0
Plod1	0	0	0	0	23	0	0
Dstyk	0	10	0	0	0	1	0
Gm13298	0	0	0	0	0	10	6
Nrip2	0	0	0	0	0	13	0
Tpm2	0	14	0	0	0	0	0
Trmt112	0	4	0	0	0	0	0
Cpne5	0	6	0	0	0	1	0
Ubxn4	0	0	0	0	0	5	0
Gm13169	0	3	0	0	0	0	0
AI314976	0	0	0	0	0	1	0
Ap2s1	0	0	0	0	1	0	0
Pogz	0	0	0	0	0	0	4
Gm13140	0	2	0	0	0	0	0
Kank2	0	8	0	0	0	0	0
Inpp5f	0	1	0	0	0	0	0
Fubp1	0	0	0	0	0	9	0
Tmem30c	0	0	0	0	0	1	0
Son	0	1	0	0	0	0	0
Snrpb	0	4	0	0	0	0	0
Man2a1	0	0	0	0	0	3	0
Tspo2	0	0	0	0	0	1	0
Gm5239	0	0	2	0	0	2	0
Ate1	0	3	0	0	10	0	0
Grlf1	0	0	0	0	1	1	0
Gm14872	0	0	0	0	0	5	0
Pax7	0	0	0	0	0	3	0
Cd47	0	0	0	0	0	1	0
Mrto4	0	1	0	0	0	6	0
Nlrc4	0	0	0	0	0	1	0
Gemin4	0	5	0	0	0	0	0
Ndrg3	11	0	0	0	0	0	0
Gm19898	0	2	0	0	0	0	0
Timp3	0	0	0	0	2	0	0
Gm5510	0	3	0	0	2	0	0
7SK	0	8	1	0	0	4	0
Gm17122	0	0	0	0	0	5	0
Sept5	0	0	0	0	4	9	0
Cst8	0	0	0	0	0	1	0
BC016495	0	7	0	0	0	0	0
1700123M08Rik	0	0	0	0	0	1	0
Ifrd2	0	1	0	0	0	0	0
Iffo2	0	0	0	0	0	3	0
Mir127	0	1	0	0	0	0	0
Tbkbp1	0	1	0	0	11	0	0
Nprl3	0	0	0	0	0	2	0
Comt	0	0	0	0	7	7	0
4930473A02Rik	0	1	0	0	0	0	0
Pag1	0	0	0	0	0	1	0
Synj1	0	3	0	0	0	0	0
Cul3	0	0	0	0	0	3	0
Tulp3	0	0	0	0	0	11	0
4930427A07Rik	0	0	0	0	0	3	0
RNaseP	0	3	0	0	0	0	0
Liph	6	0	0	0	0	0	0
Tatdn2	0	4	0	0	0	0	0
SNORA71	0	3	0	0	0	0	0
Ilf3	0	2	0	0	0	0	0
Mrps6	0	0	0	0	0	6	0
Gm16199	0	1	0	0	0	0	0
Dhx8	0	3	0	0	0	0	0
Ptgfr	0	0	0	0	0	5	0
Ywhag	0	3	0	0	0	0	0
Psd4	0	3	0	0	0	0	0
Spc24	0	10	0	0	0	0	2
Zfp281	0	1	0	0	0	10	0
Rad54l	1	1	0	0	0	0	0
Itgb2	0	0	0	0	0	4	0
Tnfaip8l1	0	12	0	0	0	0	0
Ube2q2	0	1	0	0	0	0	0
Adat3	0	0	0	0	3	0	0
Pnp2	0	0	0	0	8	0	0
Ubr7	0	0	0	0	0	3	0
Cacnb3	0	2	0	0	0	0	0
Cdkl5	0	0	0	0	0	0	1
Frs2	0	0	0	0	0	1	0
Shd	0	3	0	0	0	0	0
Tmprss5	0	0	1	0	0	0	0
Scarf2	0	0	0	0	2	0	0
Avpr1a	0	1	0	0	0	0	0
Tcp1	1	5	0	0	0	0	0
Itpk1	0	0	0	0	0	3	0
Plekhh3	0	15	0	0	0	0	0
Aldh16a1	0	3	0	0	0	1	0
Gm17134	0	0	0	0	6	0	0
5830403M04Rik	0	2	0	0	0	0	0
Atf7ip2	0	0	0	0	0	1	0
Abhd2	0	1	0	0	0	0	0
Kcnj14	0	3	0	0	0	0	0
9530077C05Rik	0	0	0	0	0	0	2
Nlrp9b	0	0	3	0	0	0	0
Tada3	0	20	0	0	0	0	0
Osbpl3	0	0	0	0	0	1	0
Klrb1	0	0	0	0	0	4	0
Gm13153	0	1	0	0	0	0	0
Vhl	0	10	0	0	0	0	0
Begain	0	0	0	0	0	2	0
Psmd1	0	0	0	0	0	12	0
Sptlc2	0	0	4	0	0	0	0
Rgl3	0	9	0	0	0	0	3
Gm13782	0	0	0	0	3	0	0
Hes1	0	0	0	0	0	2	0
Psma3	0	3	0	0	0	0	0
St3gal1	0	0	0	0	0	1	0
Shank2	0	0	0	0	3	0	0
Srsf7	0	0	0	0	0	2	0
Papola	0	0	0	0	0	3	0
Kdelr1	0	4	0	0	0	0	0
Hey1	0	0	0	0	0	2	0
Slc24a6	0	5	0	0	0	0	0
Rnf4	0	2	0	0	0	0	0
Gosr2	0	1	0	0	0	0	0
Ltn1	0	1	0	0	0	0	0
Rpap3	0	1	0	0	0	4	4
Ptpn23	0	0	0	0	3	0	0
Depdc5	0	1	0	0	0	0	0
Etv5	1	0	0	0	0	0	0
Cpa2	0	0	0	0	14	5	0
Gm15069	0	0	0	0	4	5	0
Clec2e	0	0	0	0	0	1	0
Gm5401	0	1	0	0	0	0	0
Cope	0	2	0	0	0	0	0
Gm3355	0	0	0	0	0	1	0
Mir3089	0	1	0	0	0	0	0
Wdr91	0	0	0	0	0	10	0
Gm12928	0	0	0	0	1	0	0
Slc38a3	0	1	0	0	0	0	0
Myh14	0	0	0	0	0	2	0
Gm14231	4	0	0	0	0	0	0
Gm14248	1	0	0	0	0	0	0
Klhl22	0	0	0	0	2	0	0
SCARNA17	1	2	0	0	0	0	0
Slc35d3	0	0	0	0	0	2	0
Aamp	0	25	0	0	0	0	0
Dcbld1	1	0	0	0	0	0	0
Srm	0	0	0	0	3	0	0
Ganc	0	8	0	0	0	0	0
Sugp2	0	2	0	0	0	0	0
Rpp25	0	0	0	0	0	6	0
Gpr25	0	1	0	0	0	0	0
Apc2	0	0	0	0	5	0	0
Sipa1l3	0	0	0	0	8	0	0
Exoc6b	0	2	0	0	0	0	0
Tstd2	0	3	0	0	0	0	0
Cd96	0	0	0	0	0	3	0
Cgn	0	0	0	0	0	0	2
Slc41a1	0	3	0	0	0	0	0
Cdk15	0	1	0	0	0	0	0
Jup	0	1	0	0	0	0	0
Ablim2	0	0	10	0	0	0	0
Ctnna3	0	0	0	0	2	2	0
B3gnt7	0	0	0	0	0	2	0
Setd3	0	2	0	0	0	0	0
Ndufa10	0	0	0	0	1	0	0
Slc22a15	0	2	0	0	0	0	0
Rela	0	2	0	0	1	0	0
Gm11615	0	2	0	0	0	0	0
Myl9	9	0	0	0	0	0	0
Gm8186	0	0	0	0	0	1	0
Nr3c1	4	0	0	0	0	0	0
Smcr7l	0	3	0	0	0	0	0
1700008O03Rik	0	0	0	0	0	1	0
Prmt10	0	2	0	0	0	0	0
Mbd3	0	0	0	0	6	0	0
Chmp6	0	1	0	0	0	0	0
Sntb1	0	0	0	0	0	2	0
Zfp120	0	1	0	0	0	0	0
Pitpna	0	4	0	0	0	0	0
Tmco1	0	5	0	0	0	0	0
Stradb	0	1	0	0	0	0	0
Slc6a13	0	5	0	0	0	0	0
Glis1	0	1	0	0	0	0	0
Pnpla6	0	4	0	0	0	0	0
Gm15621	0	0	0	0	0	3	0
Gm14230	5	0	0	0	0	0	0
BC005764	0	0	0	0	14	0	0
4731419I09Rik	0	0	0	0	0	1	0
Evi2b	0	0	0	0	0	1	0
Stc2	0	0	0	0	0	4	0
Syt12	0	5	0	0	0	10	0
Dos	0	0	0	0	13	0	0
Slc25a29	0	0	0	0	0	5	0
Ms4a1	0	0	0	0	0	3	0
Tesk1	0	17	0	0	0	0	0
Actr3	0	0	0	0	0	2	0
Fcgr4	0	0	0	0	0	3	0
Taar2	0	0	1	0	0	0	0
RNase	0	7	0	0	0	0	0
2900006K08Rik	0	3	2	0	0	0	0
A830005F24Rik	0	2	0	0	0	0	0
Bag3	0	1	0	0	0	0	0
Gamt	0	0	0	0	11	0	0
Fsd1	0	4	0	0	0	0	0
1700056E22Rik	0	4	0	0	0	0	0
Uqcr11	0	0	0	0	11	0	0
SNORA17	0	9	0	0	4	1	1
Ttc17	0	0	0	0	0	1	0
Tle3	0	0	0	0	3	0	0
Ptgfrn	0	1	0	0	0	0	0
Ppil4	0	0	0	0	0	3	0
AL596108.1	0	1	0	0	0	0	0
Nfatc2	0	0	0	0	6	27	0
Als2	0	4	0	0	0	0	0
Rgs8	0	6	6	0	0	0	0
Sp140	0	0	0	0	0	4	0
Larp4	0	0	0	0	0	3	0
Egr4	0	1	0	0	0	0	0
Lrrc17	0	0	0	0	1	6	0
Fam3b	0	0	0	0	0	1	0
Sirt7	0	1	0	0	0	0	0
Gm13415	0	2	0	0	0	0	0
Gm15990	0	0	0	0	1	0	0
Abcg4	0	1	0	0	0	0	0
Rnase12	0	0	0	0	1	0	0
Snrpa	0	0	0	0	0	44	0
Gfi1b	0	2	0	0	0	0	0
Ppcdc	0	0	0	0	0	8	0
Als2cl	0	0	0	0	2	0	0
Bsn	0	4	0	0	0	0	0
Ahi1	0	0	0	0	0	1	0
Fbll1	0	4	0	0	0	0	0
Gtf2e2	0	0	0	0	0	0	4
Trim37	0	0	0	0	0	14	0
Fam53b	0	3	0	0	0	0	0
Gtf2h3	0	4	0	0	0	3	0
Gapvd1	0	0	0	0	0	21	0
Tor1a	0	9	0	0	0	0	0
Xrra1	0	0	0	0	0	4	0
Gm10169	0	0	0	0	1	0	0
Iglc3	0	0	0	0	0	1	0
Tmem170b	0	0	0	0	0	8	0
Tbc1d23	0	0	0	0	0	1	0
Cyp2d9	1	1	0	0	0	0	0
SNORA29	1	4	0	0	0	0	0
1190005I06Rik	0	4	0	0	0	0	0
Zfp473	0	0	0	0	0	1	0
Rnf138	0	0	0	0	0	1	0
Idh3b	0	4	0	0	0	0	0
Atp8b5	0	5	0	0	0	0	0
Vrk1	0	0	0	0	0	2	0
Vdr	0	0	0	0	0	1	1
Lax1	0	0	0	0	0	1	0
Plekha2	0	5	0	0	0	0	0
Plcb4	0	2	0	0	0	2	0
Slc25a18	0	5	0	0	0	0	0
Angptl7	0	0	0	0	7	0	0
Agt	0	0	0	0	7	0	0
Fcer2a	0	1	0	0	0	0	0
Gm13357	2	0	0	0	0	0	0
Dpp9	0	14	0	0	0	0	0
Psg16	0	0	0	0	2	0	0
Gm12891	0	0	0	0	2	2	0
Lmx1a	0	1	0	0	0	0	0
2410001C21Rik	0	2	0	0	0	0	0
Srgap3	0	10	0	0	0	0	0
Ccdc71	0	3	0	0	0	0	0
Gm13296	0	3	0	0	0	1	0
Ccdc116	0	0	0	0	0	2	0
Malat1	0	0	0	0	1	0	0
Prrc2c	0	0	0	0	0	22	0
Mfrp	0	1	0	0	0	0	0
Dnajc30	0	0	0	0	0	9	0
9330154J02Rik	0	0	0	0	0	0	1
Tmigd1	0	1	0	0	0	0	0
Srrm3	0	1	0	0	0	0	0
Igfbp3	0	0	0	0	0	2	0
Gm10080	0	1	0	0	0	0	0
Gm16534	0	0	0	0	2	0	0
Mlf2	0	1	1	0	0	3	0
4930402F06Rik	0	0	2	0	0	0	0
Wdr81	0	1	0	0	0	0	0
Ticam1	0	13	0	0	0	0	0
Nol6	0	1	0	0	0	1	0
Mgat3	0	1	0	0	0	0	0
Krt6a	0	2	0	0	0	0	0
Farp1	0	1	0	0	0	0	0
Bpnt1	0	5	0	0	0	5	0
Htr3a	0	0	3	0	0	0	0
Hook1	0	0	0	0	0	1	0
Ecd	0	0	0	0	0	2	0
Fam120a	0	12	0	0	0	0	0
Adcy2	0	0	0	0	2	0	0
Cbwd1	0	3	0	0	0	0	0
Slc25a17	2	2	0	0	0	2	0
SNORA4	0	2	2	0	0	0	0
Sec24c	0	0	0	0	0	1	0
Ptpn11	0	0	0	0	0	1	0
Gm14277	5	0	0	0	0	0	0
Lins	0	3	0	0	0	0	0
Ccnb2	0	0	0	0	0	7	0
Olig1	0	5	0	0	0	0	0
Psmd4	0	0	0	0	0	0	3
2610020C07Rik	0	2	0	0	0	0	0
Nmnat3	0	0	0	0	9	7	0
Brd7	0	3	0	0	0	0	0
Hsp25	0	0	0	0	0	8	0
Gm13427	0	0	0	0	1	0	0
Dmbt1	0	1	0	0	1	0	0
Gm9183	0	2	0	0	0	14	0
Gcnt2	0	0	0	0	0	5	0
Plxna1	0	6	0	0	0	0	0
Vipr1	0	1	0	0	0	0	0
Vstm2l	0	4	0	0	0	0	0
SNORA70	0	1	0	0	0	0	0
Hsh2d	0	0	0	0	0	1	0
Trp53rk	0	4	0	0	0	0	0
Cars	0	0	0	0	3	0	0
Usp20	0	9	0	0	0	0	0
Nsmce4a	0	4	0	0	14	0	0
Gm13142	0	1	0	0	0	0	0
C130050O18Rik	0	3	0	0	0	0	0
Dock9	0	7	0	0	0	0	0
Sun1	0	5	0	0	0	0	0
A730036I17Rik	0	0	0	0	0	2	0
Gm11717	0	0	0	0	0	1	0
Dexi	0	2	0	0	3	5	0
Gltscr1	0	0	0	0	0	5	0
Gm10369	0	0	0	0	0	1	0
Gm17291	0	0	0	0	1	2	0
Ldlrap1	0	0	0	0	0	1	0
Ccl5	0	0	0	0	0	2	0
Rasgrp2	0	3	0	0	3	0	0
Amigo2	0	1	0	0	0	0	0
Gm9929	0	0	0	0	0	1	0
0610037L13Rik	0	2	0	0	0	0	0
Spsb2	0	3	2	0	0	0	0
Fau	0	3	0	0	3	0	0
Gm16437	0	1	0	0	0	0	0
Trim67	0	0	0	0	5	0	0
Muc1	0	0	0	0	0	1	0
Ntn4	0	0	0	0	0	3	0
Txnrd2	0	0	0	0	7	6	0
Mir484	0	2	0	0	0	0	0
Krt78	0	2	0	0	0	0	0
Det1	0	12	0	0	0	0	0
2210409E12Rik	0	0	0	0	0	7	0
Mrpl45	0	1	0	0	4	0	0
AL807823.1	0	0	0	0	0	3	1
Mms19	0	2	0	0	0	0	0
Sc4mol	0	4	0	0	0	0	0
Atp5k	0	1	0	0	0	0	0
Elf1	0	0	0	0	0	1	0
Psmb3	0	4	0	0	0	0	0
Aph1c	0	0	0	0	0	1	0
Gbgt1	0	3	0	0	0	0	0
Amt	0	4	0	0	0	0	0
Kcnk16	0	0	0	0	0	1	0
Lrrc52	0	5	0	0	0	0	0
Spcs2	0	0	0	0	0	5	0
Zc3hav1	0	0	0	0	0	4	0
Mapt	2	0	0	0	0	1	0
Sirt1	0	0	0	0	3	4	0
Arih2	0	2	0	0	1	0	0
Ep300	4	4	0	0	0	0	0
Gm5903	0	1	0	0	0	0	0
Gm16192	0	0	0	0	0	1	1
Setdb2	0	2	0	0	0	0	0
9030624J02Rik	0	7	0	0	0	0	0
Wrn	0	0	0	0	0	0	2
Nme7	0	0	0	0	0	1	0
Marveld1	0	3	0	0	0	0	0
Nrip1	0	8	0	0	0	0	0
Smarca5	0	1	0	0	0	0	0
BC048609	0	1	0	0	1	0	0
Stom	0	0	11	0	0	8	0
D830025C05Rik	0	0	0	0	0	4	0
Gm5898	0	0	3	0	0	0	0
Senp1	0	0	0	0	0	1	1
Pno1	0	0	0	0	0	10	0
Strap	0	2	0	0	0	0	0
Hrc	0	6	0	0	0	0	0
Slc25a42	0	2	0	0	0	0	0
Gm17395	0	0	0	0	0	5	0
Mettl7a3	0	0	0	0	0	3	0
Vamp4	0	0	0	0	0	23	0
Tbl2	0	0	0	0	0	4	0
Abl1	0	0	0	0	6	0	0
Pld1	0	0	0	0	2	9	0
1700029P11Rik	3	3	0	0	0	0	0
A930001C03Rik	0	4	0	0	0	5	0
Lyz1	0	0	0	0	0	3	0
Adamts9	0	0	0	0	0	3	0
Gm11524	0	0	0	0	1	0	0
Zbtb40	0	7	0	0	2	0	0
Hspa9	0	0	0	0	0	1	0
Rpl10a	0	1	0	0	0	0	0
Mrpl16	0	0	0	0	0	2	0
2900053A13Rik	0	4	0	0	0	0	0
Cyp4f18	0	0	0	0	0	2	0
Taf9	0	0	0	0	0	1	0
Ndufs7	0	0	0	0	12	0	0
Tial1	0	1	0	0	0	0	0
Mbtd1	0	3	0	0	0	0	0
Zfp961	0	0	0	0	0	1	0
H2afy3	0	0	0	0	0	1	0
Etos1	0	1	0	0	2	0	0
Dmrtb1	0	1	0	0	0	0	0
Brms1	0	1	0	0	0	0	0
Uhrf1	0	13	0	0	0	0	0
Maml1	0	4	0	0	0	0	0
Zfp354b	0	1	0	0	0	0	0
2410080I02Rik	0	0	0	0	0	1	0
Ldb1	0	0	0	0	0	0	1
Tmem33	0	0	0	0	0	1	0
Scarna17	0	1	0	0	0	0	0
Nt5c2	0	0	0	0	1	0	0
Dzip1l	0	2	0	0	0	0	0
Ocstamp	0	0	0	0	0	1	0
Ppm1f	0	0	0	0	0	4	0
Gm9378	0	0	0	0	0	9	0
Rhoa	0	4	0	0	2	0	0
Gm1614	0	0	2	0	0	2	0
Fscn2	0	1	0	0	0	0	0
Cxcr4	0	0	0	0	0	10	0
RP24	0	9	0	0	0	0	0
Gm7862	0	0	0	0	4	0	0
Tsn	0	1	0	0	0	0	0
Ccdc85a	0	0	0	0	0	1	0
1700026J04Rik	0	0	0	0	0	1	0
Gli2	0	0	0	0	0	2	0
Gm5258	0	0	0	0	0	1	0
Foxp2	0	0	0	0	0	12	0
Spink4	0	1	0	0	0	0	0
Guca1b	0	0	0	0	0	8	0
Ptgir	0	0	0	0	3	0	0
Whsc1l1	0	2	0	0	0	4	0
Txndc17	0	4	0	0	0	12	0
Napb	0	0	0	0	0	2	0
Fam96a	0	3	0	0	0	2	20
Gm17288	0	2	0	0	0	0	0
Isg20	0	9	0	0	0	0	0
Krtcap2	0	0	0	0	0	1	0
Snx27	0	0	0	0	0	0	4
Cpa1	0	0	0	0	15	3	0
Gm9900	0	0	0	0	0	2	0
Snora20	1	2	0	0	0	0	0
Rpl28	0	0	0	0	0	4	0
Elavl3	0	6	0	0	0	0	2
Cdc45	0	0	0	0	0	6	0
Chd2	0	14	0	0	0	0	0
Tekt2	0	0	0	0	1	0	0
Xrcc4	0	0	0	0	0	1	0
Prosapip1	0	3	0	0	0	0	0
SNORA24	0	4	0	0	0	0	0
C030034L19Rik	0	0	0	0	0	1	0
Rfx5	0	0	0	0	0	0	4
Gm15869	0	5	0	0	0	0	0
Sae1	0	0	0	0	0	19	0
Anpep	1	0	1	0	0	0	0
Gm14046	0	0	0	0	0	4	0
Mark2	0	7	0	0	0	0	0
Cpd	0	3	0	0	0	0	0
Atp1b1	0	0	0	0	0	1	0
Rbp4	0	0	0	0	1	1	1
Gm16493	0	0	0	0	0	1	0
Nbl1	0	1	0	0	0	6	0
AC027184.1	0	0	0	0	3	0	0
Ogg1	0	16	0	0	0	0	0
Magoh	0	2	0	0	0	0	0
Irak1bp1	0	0	0	0	0	1	0
Tmem14c	0	0	0	0	0	14	0
Mir1931	0	0	0	0	1	0	0
Lsm10	0	0	0	0	1	0	0
Kiss1r	0	0	0	0	12	0	0
Gm13229	0	1	0	0	0	0	0
Tmem111	0	19	0	0	0	0	0
Unkl	0	2	0	0	0	0	0
Galt	0	0	0	0	0	24	12
Incenp	0	4	0	0	0	0	0
Mdm2	0	0	0	0	0	1	0
AC152062.1	0	0	0	0	1	0	0
Hebp2	0	0	0	0	0	8	0
Rcan1	0	0	0	0	0	6	0
Dag1	0	3	0	0	2	0	0
Mtor	0	0	0	0	11	0	0
C2cd2l	0	1	0	0	0	0	0
Rab11fip4	0	0	0	0	0	2	0
Mrpl22	0	0	0	0	0	2	0
Nudt13	0	0	0	0	0	1	0
St7	0	0	0	0	0	3	0
Tgfb2	0	0	0	0	2	3	0
4933425O20Rik	0	2	0	0	0	0	0
Ttll3	0	16	0	0	0	0	0
Tardbp	0	0	0	0	4	0	0
Abhd11	0	0	0	0	0	10	0
Gm17284	0	2	2	0	0	0	0
E130114P18Rik	0	0	0	0	0	2	0
Fam86	0	3	0	0	0	0	0
Cpsf6	0	0	0	0	0	1	0
Kcnh6	0	0	0	0	0	1	0
Dcxr	0	1	0	0	0	0	0
Sdccag3	0	0	0	0	1	0	0
Klrb1b	0	0	0	0	0	13	0
Cpa4	0	0	0	0	11	3	0
Gm13726	0	0	0	0	0	1	0
Exosc2	0	0	0	0	6	0	0
Apex1	0	0	0	0	8	0	0
Bcl2l13	0	4	0	0	0	0	0
E030030I06Rik	0	0	0	0	0	1	0
Tomm34	0	0	0	0	0	3	0
Gm13302	0	0	0	0	0	6	4
Clptm1	0	0	2	0	0	0	0
Dhx9	0	4	4	0	0	0	0
Slc16a9	0	0	0	0	0	6	0
Pcsk4	0	0	0	0	9	0	0
Sgk1	0	0	0	0	0	8	0
Grip2	0	3	0	0	0	0	0
Nbr1	0	6	0	0	0	0	0
Qtrt1	0	4	0	0	0	0	0
Bhlha9	0	3	0	0	0	0	0
Gm14287	0	1	0	0	0	0	0
Gm20520	0	2	0	0	0	0	0
Vps72	0	0	0	0	0	0	1
Gm15599	0	2	0	0	0	0	0
Ppp3cb	0	0	0	0	0	1	0
Akap12	0	0	0	0	0	7	0
Stk24	0	4	0	0	0	0	0
Dap3	0	0	0	0	0	1	0
Ccdc109a	0	0	0	0	8	0	0
Tnfrsf23	0	0	0	0	1	0	0
Pomt2	0	0	18	0	0	0	0
Max	0	0	0	0	1	0	0
Ap1ar	0	0	0	0	0	3	0
Thy1	0	1	0	0	0	0	0
Cpsf7	0	1	0	0	0	0	0
Gm12403	0	1	0	0	0	3	0
Mir1306	0	0	0	0	2	0	0
Usp49	0	2	0	0	0	16	0
Ghsr	0	0	0	0	1	2	0
Ibtk	0	0	0	0	0	0	6
Nexn	0	0	0	0	0	8	0
Gm10010	0	0	0	0	0	2	0
Gm16069	0	0	0	0	0	1	0
Gm16149	0	0	0	0	0	4	0
Dnahc3	0	1	0	0	0	0	0
Prr15l	0	0	0	0	16	0	0
Malt1	0	0	0	0	0	1	0
Gpr107	0	8	0	0	0	0	0
U1	0	3	0	0	2	5	0
Dmap1	0	5	0	0	0	0	0
Nlrc5	0	0	0	0	3	0	0
Pigb	0	1	0	0	0	0	0
AK010878	0	0	0	0	0	2	0
Ccdc24	0	5	0	0	0	1	0
Filip1l	0	0	0	0	0	1	0
Cxcl3	0	0	0	0	0	1	0
Luzp1	0	10	0	0	2	0	0
1700106N22Rik	0	0	0	0	0	1	0
Rbx1	4	4	0	0	0	0	0
Prr19	0	1	0	0	0	0	0
Fgfr2	0	1	0	0	0	0	0
Ppapdc1b	0	1	0	0	0	7	0
Gm15500	0	0	0	0	0	18	0
Ivns1abp	0	3	0	0	0	1	0
Slc22a1	0	2	0	0	0	0	0
2900010M23Rik	0	1	0	0	0	0	0
Gm16574	1	2	0	0	0	0	0
Csad	0	3	0	0	0	0	0
Gm98	0	4	0	0	0	0	0
Crx	0	0	0	0	0	2	0
Kat5	0	1	0	0	0	0	0
Cd79a	0	4	0	0	0	0	0
Fam169a	0	0	0	0	0	2	0
Pik3r3	1	2	0	0	0	0	0
Tpsg1	0	0	0	0	0	1	0
Haus3	0	2	0	0	0	0	0
Gm12691	0	0	0	0	0	1	0
Rab44	0	5	0	0	0	1	0
Il15ra	0	4	0	0	0	4	0
Eif2c3	0	0	0	0	1	0	0
Rbm25	0	4	3	0	0	0	0
Serpina1d	0	1	0	0	0	0	0
AW555464	0	0	0	0	0	9	0
Perp	0	0	0	0	0	2	0
Tlr7	0	0	0	0	0	6	0
Ftsj3	0	0	0	0	0	1	0
Nubp1	0	1	0	0	2	4	0
Nploc4	0	1	0	0	0	0	0
Sssca1	0	2	0	0	2	0	0
Sbno2	0	0	0	0	14	0	0
Klhl18	0	0	0	0	3	0	0
Lrp5	0	1	0	0	0	0	0
Cbr4	0	0	0	0	0	2	0
Hspa2	0	0	0	0	7	0	0
2310016M24Rik	0	0	0	0	0	2	0
Ccpg1	0	1	0	0	0	0	0
Col5a1	0	3	0	0	0	0	0
Gm498	0	0	0	0	1	0	0
Rae1	0	26	0	0	0	0	0
Atf5	0	3	0	0	0	1	0
Prdx5	0	5	0	0	0	0	0
Lrtm2	0	0	0	0	0	2	0
Gm17711	0	0	0	0	0	2	0
Gm14826	0	1	0	0	0	0	0
BB365896	0	0	0	0	0	3	0
1700081L11Rik	2	0	0	0	0	5	0
Sufu	0	0	0	0	1	0	9
Ephx2	0	0	0	0	5	14	2
Dbp	0	7	0	0	0	0	0
Ttc13	0	0	0	0	7	0	0
Gm15963	0	0	0	0	0	1	0
Gm9881	0	3	0	0	0	0	0
Rbl1	8	0	0	0	0	0	0
Tmem150c	0	3	0	0	0	0	0
Rspry1	0	0	0	0	1	0	0
Fabp4	0	0	0	0	0	1	0
Gm12197	0	1	0	0	0	0	0
Mrps16	0	0	0	0	0	1	0
Nomo1	0	3	0	0	0	0	0
Tmem87a	0	8	0	0	0	0	0
SNORA25	0	2	0	0	0	0	0
Prkrir	0	1	0	0	0	0	0
Tmem180	0	0	0	0	0	0	3
Eif4a	0	2	0	0	0	0	0
Gde1	0	7	0	0	0	1	0
Gm10462	0	0	0	0	0	1	0
Serpina10	0	1	0	0	0	0	0
Kcna7	0	4	0	0	0	0	0
Gm10271	0	0	0	0	0	1	0
Sacs	0	0	0	0	0	2	0
Gm13260	0	4	0	0	0	2	0
4931406C07Rik	0	6	0	0	0	0	0
Capn3	0	1	0	0	0	0	0
4930512H18Rik	0	0	0	0	0	1	0
2610027K06Rik	0	1	0	0	0	0	0
Usp33	0	0	0	0	0	9	0
Dhx34	0	0	0	0	0	19	0
Dctn6	0	0	0	0	0	0	3
Ubtd1	0	3	0	0	0	0	0
Prdm15	0	0	0	0	0	1	0
Sh3bp5l	0	0	0	0	0	2	0
Ip6k2	0	0	0	0	4	0	0
Rybp	0	0	0	0	0	12	0
2310015B20Rik	0	0	0	0	0	3	0
Tex15	0	0	0	0	0	0	1
1700020N01Rik	0	0	0	0	0	1	0
1700056N10Rik	0	0	0	0	0	1	0
Mesp2	1	0	0	0	0	0	0
Paip2b	0	1	0	0	0	0	0
Scarb1	0	6	0	0	0	0	0
Opa1	0	0	0	0	0	8	0
Ptchd2	0	0	0	0	3	0	0
Col6a6	0	0	0	0	0	1	0
Ppp1r3a	0	0	0	0	0	2	0
Cdca4	0	0	0	0	0	11	0
Gpr180	0	0	0	0	0	1	0
Inpp5a	0	3	0	0	0	0	0
Tdrkh	0	0	0	0	0	0	1
Ccdc104	0	0	0	0	0	2	0
Rab2a	0	0	6	0	0	0	0
Dnaic1	0	0	0	0	0	9	5
Gsc2	0	0	0	0	1	0	0
1300015D01Rik	0	6	0	0	0	0	0
Phf3	0	1	0	0	0	0	0
Gm13899	0	1	0	0	0	1	0
Ptges2	0	0	0	0	1	0	0
Flrt1	0	3	0	0	0	0	0
Gm4117	0	0	0	0	0	1	0
Rpl18	0	14	0	0	0	13	0
Il17rc	0	15	0	0	0	0	0
Gm14276	10	0	0	0	0	0	0
Rab14	0	0	11	0	0	20	0
Bend6	0	0	0	0	0	9	0
Dcaf7	0	0	0	0	0	1	0
Chd7	0	0	7	0	0	0	0
Elovl2	0	0	0	0	0	4	0
Fem1a	0	12	0	0	0	0	0
Abhd10	0	0	0	0	0	3	0
Mfge8	0	5	0	0	0	0	0
Zfp672	0	0	0	0	0	1	0
Tmem171	0	0	0	0	0	2	0
C2cd4c	0	0	0	0	1	0	0
Kcne2	0	0	0	0	0	3	0
Lhx6	0	0	0	0	0	2	0
Mgat5	0	0	0	0	0	3	0
Hnf4g	0	1	0	0	0	0	0
Arpc2	0	24	0	0	0	0	0
Canx	0	5	0	0	0	0	0
Hagh	0	1	0	0	0	0	0
Heatr6	0	0	0	0	0	4	0
2310046O06Rik	0	0	0	0	0	5	0
Ccdc8	0	0	0	0	2	0	0
Kpna4	0	3	0	0	0	0	0
Pabpc1l	0	0	0	0	0	1	0
Armc6	0	2	0	0	0	0	0
4933406I18Rik	0	0	0	0	0	3	0
Ash2l	0	0	0	0	0	5	0
Mtap7	0	0	0	0	0	3	0
Arrb1	0	1	0	0	0	0	0
Bmp7	0	20	0	0	0	0	0
Gtsf1l	0	0	0	0	0	1	0
Zfp936	0	0	1	0	0	0	0
Ntrk3	0	4	0	0	0	0	0
Ahsa1	0	0	10	0	0	0	0
Ccdc6	0	0	0	0	0	27	0
[truncated: 4,244 more rows]

## Sheet: 7f_PM2.5 Chi
Supplemental Table 7f: Enhancer peaks linked to DEGs for 'PM2.5 Chi over Veh' comparison (Figure 5)
Number of peaks in enhancers (for each histone mark) linked to DEGs (Enhancer Atlas, merged anchors)
Genes	Peak count for H3K27ac up peaks	Peak count for H3K4me1 up peaks	Peak count for H3K4me3 up peaks	M_liver_5mo_PM2.5Chi.over.VEH	Peak count for H3K27ac down peaks	Peak count for H3K4me1 down peaks	Peak count for H3K4me3 down peaks
Cyp4a14	0	0	3	2.69238	0	0	0
Cfd	0	0	2	2.49621	0	0	0
Fos	0	0	0	2.33949	0	0	0
Pnldc1	0	0	8	2.29574	0	0	0
Dbp	0	0	0	2.25614	0	0	0
Nr4a1	0	0	17	1.85647	0	0	0
Slc26a4	0	0	0	1.71355	0	0	0
Cidec	0	0	5	1.60834	0	0	0
Osbpl3	1	0	1	1.60553	0	0	0
Cyp4a10	0	0	1	1.55103	0	0	0
Mogat1	0	0	0	1.54643	0	0	0
Gal3st1	0	0	0	1.51932	0	0	0
Pltp	0	0	0	1.3528	0	0	0
Cyp2c38	0	0	0	1.33987	0	0	0
Angptl8	0	0	0	1.33842	0	0	0
Pparg	0	0	12	1.28886	0	0	0
Fgf21	0	0	0	1.27895	0	0	0
Clstn3	0	0	10	1.26585	0	0	0
Ntrk2	0	0	0	1.23907	0	0	0
Fmr1nb	0	0	0	1.20527	0	0	0
G0s2	3	0	0	1.19572	0	0	0
Sema5b	0	0	0	1.18882	0	0	0
Vnn1	0	0	0	1.17127	0	0	1
Pcsk4	0	0	4	1.15282	0	0	0
Per3	0	0	0	1.14193	0	0	0
Lgals1	0	0	8	1.13971	0	0	0
Hamp2	0	0	0	1.12578	0	0	0
Atf3	0	0	0	1.12553	0	0	0
Aacs	0	0	5	1.10954	0	0	0
Acss3	0	0	0	1.09276	0	0	0
Stap1	0	0	0	1.0866	0	0	0
Inmt	0	0	4	1.08553	0	0	0
Gngt1	0	0	0	1.08323	0	0	0
Gpx6	0	0	0	1.06467	0	0	0
Cyp46a1	0	0	9	1.05581	0	0	0
Sp5	0	0	1	1.04937	0	0	0
Cd36	0	0	5	1.04213	0	0	0
Krt23	0	0	0	1.03915	0	0	0
Tpm2	0	0	0	1.02623	0	0	0
Wee1	2	0	0	1.01925	0	0	0
Acot1	22	0	5	1.00958	0	0	0
Arhgef9	0	0	0	0.99781	0	0	0
Slc17a8	0	0	1	0.995609	0	0	0
Gadd45a	0	0	0	0.989001	0	0	0
Abcd2	8	0	0	0.986624	0	0	0
Fabp2	0	0	0	0.983216	0	0	0
Acot2	22	0	5	0.9745	0	0	0
Il1b	0	0	0	0.97404	0	0	5
Olig1	0	0	6	0.966193	0	0	0
Egr1	0	0	0	0.964168	0	0	0
Ankrd37	0	0	0	0.926292	0	0	0
Mgst3	0	0	0	0.924058	0	0	0
Slc39a5	0	0	0	0.916602	0	0	0
Clec2h	0	0	0	0.910625	0	0	0
Mid1ip1	0	0	0	0.909271	0	0	0
Slpi	0	0	0	0.905842	0	0	0
Acaa1b	0	0	0	0.900863	0	0	0
Scand1	0	0	8	0.894431	0	0	0
Rgs16	0	0	0	0.891943	0	0	0
Cabcoco1	0	0	0	0.860065	0	0	0
Erbb4	0	0	0	0.856139	0	0	0
Rnf186	0	0	3	0.853393	0	0	0
Jun	0	0	0	0.844798	0	0	0
Aqp4	0	0	1	0.843543	0	0	0
Rdh16	0	0	0	0.842354	0	0	0
Cyp26a1	0	0	0	0.834218	0	0	0
Esrrg	0	0	0	0.825937	0	0	0
Gsta2	0	0	0	0.821146	0	0	0
Fgfrl1	0	0	6	0.812692	0	0	0
Tnfrsf19	0	0	0	0.811677	0	0	0
Ddit4l	0	0	0	0.80422	0	0	0
Tceal8	0	0	0	0.793138	0	0	0
Serpinb1a	0	0	0	0.790052	0	0	0
Cyp2a5	1	0	0	0.789359	0	0	0
Aldh3a2	0	0	5	0.784514	0	0	0
Tox	0	0	1	0.784349	0	0	0
Aqp8	0	0	0	0.78358	0	0	0
Tlr12	0	0	2	0.781567	0	0	0
Gm5617	0	0	0	0.777126	0	0	7
Sucnr1	0	0	1	0.770937	0	0	0
Ubd	0	0	0	0.768623	0	0	0
Acot4	7	0	0	0.768395	0	0	0
Igfbp6	0	0	7	0.756044	0	0	0
Fitm1	0	0	0	0.753545	0	0	0
Cnmd	0	0	0	0.752538	0	0	0
Lingo4	0	0	0	0.748338	0	0	0
D630039A03Rik	0	0	0	0.742895	0	0	0
Ier2	0	0	0	0.74228	2	0	0
Cyp2b10	0	0	0	0.733889	0	0	0
Stx1b	0	0	0	0.73372	0	0	0
Grik5	0	0	0	0.731194	0	0	0
Zfp979	0	0	0	0.725487	0	0	0
C2cd4d	0	0	0	0.724954	0	0	0
9130409I23Rik	0	0	0	0.724766	0	0	0
Cebpe	0	0	0	0.721821	3	0	0
Me1	0	0	5	0.721713	0	0	0
Spc24	0	0	0	0.719082	9	3	0
Tsc22d1	0	0	0	0.716407	0	0	0
Paqr7	0	0	7	0.716268	4	0	0
Zfp992	0	0	0	0.712796	0	0	0
Tnnc1	0	0	2	0.703712	0	0	0
Ripply1	0	0	0	0.702425	0	0	0
Ly6d	0	0	0	0.702135	0	0	0
Krt7	0	0	8	0.70034	0	0	0
F3	0	0	3	0.690763	0	0	0
Slc6a16	0	0	0	0.690028	0	0	0
Xrcc3	0	0	2	0.687562	4	0	0
Spag4	0	0	0	0.686833	0	0	0
Slc25a10	0	0	0	0.682299	0	0	0
Jph1	0	0	0	0.67936	0	0	0
Fam241b	0	0	0	0.665165	0	0	0
2310039H08Rik	0	0	17	0.663846	0	0	0
Junb	0	0	0	0.659484	0	0	0
Wfdc2	0	0	0	0.659205	0	0	0
Azin2	0	0	0	0.653732	0	0	0
Slc16a5	0	0	0	0.650984	0	0	0
Kbtbd12	0	0	6	0.65029	0	0	0
Leap2	0	0	0	0.646771	0	0	0
Axin2	0	0	0	0.645575	0	0	0
Gm45716	0	0	0	0.641157	0	0	0
Rnf43	0	0	0	0.640193	0	0	0
Hspa1a	0	0	0	0.639793	0	0	0
Akr1c19	0	0	0	0.639349	0	0	0
Itpka	0	0	0	0.638106	0	0	0
Gstt2	0	0	0	0.63273	0	0	0
Sertad1	0	0	9	0.630696	0	0	0
Tbx3	0	0	2	0.627747	0	0	0
Jund	0	0	2	0.627572	0	0	0
Proca1	0	0	1	0.626309	1	0	0
Igfbp5	0	0	0	0.624445	0	0	0
Smlr1	0	0	0	0.622443	0	0	0
Id2	0	0	0	0.619828	0	0	0
Cirbp	0	0	3	0.618144	0	0	0
Ces1e	7	0	3	0.617505	0	0	0
Gstt3	0	0	0	0.617374	0	0	0
Tmem134	0	0	4	0.613402	9	0	0
Iqcg	0	0	3	0.612657	0	0	0
Cabyr	0	0	0	0.612631	0	0	0
Frat1	0	0	0	0.612123	0	0	0
Kctd2	0	0	0	0.611359	2	0	1
Fcor	0	0	0	0.607691	0	0	0
Srebf1	0	0	0	0.605517	1	0	0
Ppp1r35	0	0	1	0.602432	0	0	0
Unc93a2	0	0	0	0.601826	0	0	0
Macrod1	0	0	7	0.59775	0	0	0
Dll1	0	0	0	0.596593	0	0	0
Upk3b	0	0	0	0.595845	0	0	0
Abcc3	0	0	3	0.592144	0	0	0
Adora1	0	0	0	0.591904	0	0	0
Mme	0	0	0	0.590789	0	0	0
1190005I06Rik	0	0	8	0.589144	0	0	0
Lrtm1	0	0	0	0.589131	0	0	0
Plin4	0	0	0	0.587652	0	0	0
Ces1d	7	0	3	0.587451	0	0	0
Bhlhe40	0	0	2	0.5852	0	0	0
BB365896	0	0	0	0	0	0	2
Dlc1	0	0	2	0	0	0	0
Edar	0	0	3	0	1	0	0
Rps16	0	0	11	0	0	0	0
Snx22	0	0	3	0	0	0	0
Gm16577	0	0	1	0	0	0	0
6330578E17Rik	0	0	9	0	0	0	0
Igsf3	0	0	2	0	0	0	0
Syk	0	0	4	0	1	0	0
1500032L24Rik	0	0	4	0	0	0	0
Tm9sf3	0	0	6	0	0	0	0
Cnih	0	0	2	0	0	0	0
Camk2a	0	0	3	0	0	0	12
Nceh1	0	0	0	0	1	0	0
Upf3a	0	0	0	0	1	0	7
Sema3f	0	0	2	0	0	0	0
Rhoa	0	0	1	0	0	0	0
Atg4d	0	0	0	0	0	2	0
Apeh	0	0	1	0	0	0	0
AC159243.1	0	0	1	0	0	0	0
Gm9758	0	0	2	0	0	0	0
Immp2l	0	0	1	0	0	0	0
Gm8482	0	0	7	0	0	0	0
Gtdc1	0	0	2	0	0	0	0
Phf2	0	0	18	0	0	0	0
Wdr81	0	0	1	0	0	0	0
Hs2st1	0	0	13	0	0	0	0
4933403G14Rik	0	0	1	0	0	0	0
Med9	0	0	0	0	3	0	0
Slit3	0	0	9	0	0	0	0
Srp54b	0	0	0	0	1	0	0
Gm13183	0	0	7	0	0	0	0
Gm16156	0	0	4	0	0	0	0
Eml1	0	0	10	0	0	0	0
2210404O07Rik	0	0	13	0	0	0	10
2810422J05Rik	0	0	5	0	0	0	0
Smurf2	0	0	3	0	0	0	0
Atp1a1	0	0	2	0	0	0	0
Gpr157	0	0	4	0	0	0	0
Gm16118	0	0	1	0	0	0	0
Gm10044	0	0	0	0	9	0	0
Clcf1	0	0	0	0	12	0	0
Cflar	0	0	5	0	0	0	0
G630016G05Rik	0	0	1	0	0	0	0
Pdk4	0	0	5	0	0	0	0
Sv2b	0	0	2	0	0	0	0
Tmem165	0	0	3	0	0	0	0
Ogn	0	0	1	0	0	0	0
Rltpr	0	0	6	0	0	0	0
Gcnt2	0	0	3	0	0	0	0
Arglu1	0	0	4	0	0	0	0
Clec2d	0	0	0	0	0	0	5
Pou3f1	0	0	3	0	0	0	0
Thumpd3	0	0	11	0	0	0	0
Cd3e	0	0	10	0	0	0	0
A530053G22Rik	0	0	1	0	0	0	0
Cebpb	0	0	6	0	0	5	9
Uba3	0	0	11	0	0	0	0
Bcl6	0	0	1	0	0	0	2
Rgs9bp	0	0	1	0	0	0	0
Gm10339	0	0	0	0	1	0	0
Ankrd61	0	0	4	0	0	0	0
Gm14418	0	0	2	0	0	0	0
8430410A17Rik	0	0	2	0	0	0	0
Frk	0	0	6	0	0	0	0
Slc34a2	0	0	8	0	0	0	0
Hoxd1	0	0	4	0	0	0	0
Atp5g3	0	0	3	0	0	0	0
Alas1	0	0	0	0	8	0	0
Ikbkb	0	0	3	0	0	0	0
Kif19a	0	0	0	0	5	0	2
Ewsr1	0	0	10	0	0	0	0
Gm12192	0	0	1	0	0	0	0
Gm10279	0	0	15	0	0	0	0
Sgtb	0	0	6	0	0	0	0
Fam19a4	0	0	1	0	0	0	0
2610109H07Rik	0	0	7	0	0	0	0
Zfp775	3	0	3	0	0	0	0
Atp6v0b	1	0	0	0	0	0	0
Serhl	0	0	4	0	0	0	0
Gm11698	0	0	1	0	1	0	5
Glod4	0	0	1	0	0	0	2
Twist1	0	0	1	0	0	0	0
Gm9747	0	0	9	0	0	0	0
Elavl3	0	0	0	0	5	0	0
Epha2	0	0	7	0	6	0	0
Wnt7a	0	0	3	0	0	0	0
1110004F10Rik	0	0	3	0	0	0	0
Gm10717	0	0	1	0	0	0	0
1700041G16Rik	0	0	2	0	0	0	0
Arrdc1	0	0	1	0	0	0	0
Atg12	0	0	1	0	1	0	0
Enpp5	0	0	2	0	0	0	0
Zfp93	0	0	3	0	2	0	0
Cyp4a12a	0	0	2	0	0	0	0
Snx5	0	0	1	0	0	0	0
Itgb5	0	0	4	0	0	0	0
Pcnxl2	0	0	1	0	0	0	0
Rad9b	0	0	0	0	4	0	0
Armc7	0	0	0	0	0	0	1
Rnf207	0	0	4	0	0	0	0
Myo1g	0	0	1	0	0	0	0
Naa35	0	0	1	0	0	0	0
Gm18343	0	0	1	0	0	0	0
Uso1	0	0	0	0	14	0	0
Arid5a	0	0	0	0	9	0	0
Tspyl3	0	0	9	0	0	0	0
Farp2	0	0	1	0	1	0	0
Cpne5	0	0	5	0	0	0	0
E230008N13Rik	0	0	2	0	0	0	0
Tnfrsf14	0	0	1	0	0	0	0
2610034B18Rik	0	0	1	0	0	0	0
Cobra1	0	0	2	0	0	0	0
Ltbr	0	0	5	0	11	0	0
Zc3h12a	0	0	1	0	0	0	0
AL589902.1	0	0	1	0	0	0	0
Arhgap24	0	0	2	0	0	0	0
Pask	0	0	1	0	1	0	0
4933411K20Rik	0	0	1	0	0	0	0
Chl1	0	0	3	0	0	0	0
Rnf19b	0	0	10	0	0	0	0
Cbx8	2	0	6	0	0	0	0
Ttll11	0	0	3	0	0	0	0
Gm13232	0	0	3	0	0	0	0
Kiss1r	0	0	2	0	0	0	0
Iah1	0	0	0	0	15	0	0
Atrn	0	0	2	0	2	0	3
Fam53b	0	0	32	0	0	0	0
Pcsk9	0	0	2	0	0	0	0
Dicer1	0	0	8	0	0	0	0
Mir1903	0	0	2	0	0	0	0
A230046K03Rik	0	0	3	0	0	0	0
BC029722	0	0	1	0	0	0	0
Cldn10	0	0	1	0	0	0	0
Rnd2	0	0	0	0	0	0	4
Gm15497	0	0	3	0	0	0	0
AL807824.1	0	0	3	0	2	0	0
Pias1	0	0	11	0	0	0	0
Gm5766	0	0	1	0	0	0	0
Gm13185	0	0	7	0	0	0	0
Tlk1	6	0	12	0	0	0	0
Gm17688	0	0	1	0	0	0	0
Tmprss6	0	0	0	0	0	0	1
Pvalb	0	0	0	0	0	0	2
Mtrf1	0	0	3	0	0	0	0
8430427H17Rik	0	0	14	0	0	0	0
Gm11172	0	0	3	0	0	0	0
Mcts2	0	0	4	0	0	0	0
Dpp7	0	0	1	0	0	0	0
Gm17415	0	0	1	0	1	0	0
Armc6	0	0	28	0	0	0	0
C330006D17Rik	0	0	2	0	0	0	0
Gltpd1	0	0	7	0	0	0	0
Impa1	0	0	4	0	0	0	0
Dkkl1	0	0	0	0	2	0	0
Rnpepl1	0	0	2	0	4	0	0
Hoxa7	0	0	1	0	0	0	0
Olfm4	0	0	1	0	0	0	0
Ern1	0	0	1	0	0	0	0
Zranb1	0	0	20	0	0	0	0
C130040N14Rik	0	0	2	0	0	0	0
Nthl1	0	0	2	0	0	0	0
Gm15935	0	0	0	0	1	0	0
Smurf1	0	0	18	0	0	0	0
Col6a3	0	0	0	0	2	0	0
Gfer	0	0	2	0	0	0	0
Rcn3	0	0	0	0	1	0	0
Ift140	0	0	2	0	0	0	0
1810011H11Rik	0	0	1	0	0	0	0
Iqck	0	0	2	0	0	0	0
Grik2	0	0	11	0	0	0	0
Zc3hc1	0	0	0	0	4	0	0
Nipsnap1	0	0	8	0	0	0	0
Gm13181	0	0	5	0	0	0	0
Dmbt1	0	0	2	0	0	0	1
Coq9	0	0	0	0	1	0	0
Ankrd24	2	0	12	0	0	0	29
Ccdc106	0	0	1	0	0	0	0
Noto	0	0	1	0	0	0	0
Sorcs2	0	0	1	0	0	0	0
Eml6	0	0	15	0	0	0	0
Tcf4	0	0	19	0	0	0	0
Ccdc142	0	0	1	0	7	0	0
5330417H12Rik	0	0	8	0	0	0	0
AC122119.1	0	0	1	0	0	0	0
Cd300lh	0	0	0	0	0	0	6
Psmb10	0	0	10	0	1	0	0
Styk1	0	0	0	0	0	0	1
Bmpr2	0	0	0	0	1	0	0
Susd3	0	0	1	0	0	0	0
Gm13547	0	0	2	0	0	0	0
Xrcc6bp1	0	0	7	0	0	0	0
BC024659	0	0	1	0	0	0	0
Laptm4a	10	0	0	0	0	0	0
Pik3r6	0	0	3	0	0	0	0
Sdf4	0	0	7	0	0	0	0
Hipk1	0	0	2	0	0	0	0
Clcnka	0	0	0	0	1	0	0
Ptprk	0	0	1	0	0	0	0
Zfand5	1	0	5	0	0	0	0
Icam2	0	0	1	0	0	0	0
Fah	0	0	9	0	0	0	0
2510009E07Rik	0	0	2	0	0	0	0
Rac3	0	0	3	0	0	0	0
Pole3	0	0	2	0	0	0	0
Gga3	0	0	0	0	1	0	0
Kbtbd13	0	0	5	0	0	0	0
U8	0	0	6	0	0	0	0
Ctdsp2	0	0	19	0	0	0	0
AL596111.1	0	0	1	0	0	0	0
A530020G20Rik	0	0	1	0	0	0	0
C1qtnf5	0	0	4	0	0	0	0
Gm13748	0	0	1	0	0	0	0
Lrp3	0	0	1	0	0	0	0
Sec61g	0	0	0	0	30	0	0
Siglec5	0	0	2	0	0	0	0
1700095J03Rik	0	0	1	0	0	0	0
Timm8a2	0	0	10	0	0	0	0
Dctn4	0	0	1	0	0	0	2
Med23	0	0	3	0	0	0	0
Otof	0	0	1	0	0	0	0
Gm10620	0	0	1	0	0	0	0
Hinfp	0	0	4	0	0	0	0
Gpr113	0	0	1	0	1	0	0
U2af2	0	0	1	0	0	0	0
Mcart1	0	0	4	0	0	0	0
Gm5544	0	0	4	0	0	0	0
Zfp28	0	0	1	0	0	0	0
Snora64	0	0	1	0	0	0	0
Cyc1	0	0	2	0	0	0	0
Sdk2	0	0	2	0	0	0	0
Gm6822	0	0	8	0	2	0	0
Pmpcb	0	0	6	0	0	0	0
Cby3	0	0	1	0	0	0	0
1810074P20Rik	9	0	0	0	0	0	0
Aspdh	0	0	3	0	0	0	0
Mir3960	0	0	1	0	1	0	0
Iqcf4	0	0	0	0	1	0	0
Zfp605	0	0	10	0	0	0	0
Zer1	0	0	4	0	0	0	0
Lass5	0	0	0	0	1	4	0
Arf2	0	0	1	0	0	0	0
Txlna	0	0	2	0	0	0	0
Setd8	0	0	11	0	0	0	0
Csad	0	0	7	0	0	0	0
Glp2r	0	0	0	0	1	0	0
Mcl1	0	0	2	0	0	0	27
Ak4	0	0	10	0	0	0	0
Nomo1	1	0	0	0	0	0	0
Sftpa1	0	0	2	0	0	0	0
Fbxl8	0	0	0	0	4	0	0
Bsg	0	0	6	0	0	0	0
Sirpa	0	0	0	0	0	0	6
Stau1	0	0	0	0	0	1	0
Gm12875	1	0	0	0	0	0	0
Azi1	0	0	4	0	3	0	0
Iqgap2	0	0	2	0	0	0	0
Prss57	0	0	2	0	0	0	0
Lrig3	0	0	5	0	0	0	0
Arl1	2	0	1	0	0	0	0
C030046I01Rik	0	0	4	0	0	0	0
Gm17233	0	0	2	0	0	0	0
Brd7	0	0	15	0	0	0	15
Pcolce	0	0	1	0	0	0	0
Scarna17	0	0	4	0	0	0	0
Foxa2	0	0	0	0	1	0	0
4930547M16Rik	0	0	1	0	0	0	0
Pvrl3	0	0	1	0	0	0	0
Rtp3	0	0	2	0	0	0	0
Rbm5	0	0	4	0	0	0	0
Fam124a	0	0	1	0	0	0	0
Kdm2b	0	0	19	0	0	0	0
Zfp148	0	0	6	0	0	0	0
Dlgap4	0	0	9	0	0	0	0
Nop2	0	0	5	0	7	0	0
Gm15368	0	0	1	0	0	0	0
Gm16161	0	0	4	0	0	0	0
Hint1	0	0	4	0	0	0	0
Gm17691	1	0	0	0	0	0	0
Gm14091	0	0	8	0	0	0	0
Ap3d1	0	0	8	0	0	0	0
1700057G04Rik	0	0	3	0	0	0	0
Mon2	0	0	10	0	0	0	0
Lamp1	0	0	0	0	5	0	2
Itgb1bp1	0	0	0	0	16	0	0
Arid3b	0	0	1	0	0	0	0
1700001O22Rik	0	0	2	0	2	0	0
Kctd1	0	0	1	0	0	0	0
Gsk3b	0	0	4	0	0	0	0
E230028L10Rik	0	0	1	0	0	0	0
1700086P04Rik	0	0	4	0	0	0	0
Cbr4	0	0	1	0	0	0	0
Rps2	0	0	17	0	0	0	0
Fam38a	0	0	6	0	0	0	0
Ranbp3	0	0	6	0	0	0	0
4930408O17Rik	0	0	1	0	0	0	0
Gm15335	0	0	0	0	0	0	1
Irs1	0	0	9	0	0	0	0
Niacr1	0	0	1	0	0	0	0
Gimap6	6	0	6	0	0	0	0
Atxn10	0	0	4	0	0	0	0
Tcte1	0	0	3	0	0	0	0
Gm12969	0	0	2	0	0	0	0
Creg2	0	0	2	0	0	0	0
Gm6565	0	0	2	0	0	0	0
Gigyf1	0	0	1	0	0	0	0
Pde6a	0	0	0	0	0	0	5
Slain1	1	0	0	0	0	0	0
Trbv26	0	0	5	0	0	0	0
Usp48	0	0	16	0	0	0	0
3110053B16Rik	0	0	0	0	7	0	0
Pag1	0	0	1	0	0	0	0
Fau	0	0	76	0	0	0	0
1110012J17Rik	0	0	9	0	0	0	0
Hif1a	1	0	0	0	0	0	0
Cpne9	0	0	7	0	0	0	0
9230114K14Rik	0	0	1	0	0	0	0
Cpsf4	0	0	15	0	0	0	0
Arpc3	0	0	0	0	3	0	0
Apoc3	0	0	2	0	0	0	0
Parp4	0	0	0	0	0	0	3
6430503K07Rik	0	0	1	0	0	0	0
Arhgef10l	0	0	3	0	0	0	0
Kcna2	0	0	5	0	0	0	0
Jakmip3	0	0	9	0	0	0	0
Tex2	0	0	2	0	0	0	0
Atp8a1	0	0	2	0	0	0	0
Cmklr1	0	0	7	0	0	0	0
Irf3	0	0	0	0	2	0	0
Tuba1a	0	0	0	0	3	0	0
Rai14	0	0	2	0	0	0	0
Gm18128	0	0	1	0	0	0	0
Ass1	0	0	7	0	0	0	0
Mapre2	0	0	2	0	0	0	0
Iqsec1	0	0	1	0	3	0	0
Pdf	0	0	0	0	1	0	0
1700061J05Rik	0	0	0	0	0	0	2
Scn4b	0	0	9	0	0	0	0
Eme2	0	0	1	0	0	0	0
Gm13422	0	0	1	0	0	0	0
Mob2	0	0	1	0	0	0	0
2410015M20Rik	0	0	7	0	0	0	0
Acsf3	0	0	25	0	0	0	0
Pgm1	0	0	7	0	0	0	0
Zfp219	0	0	3	0	0	0	0
Grb2	0	0	0	0	1	0	0
Wdr3	0	0	23	0	0	0	0
Trim45	0	0	1	0	0	0	0
Taf7l	0	0	0	0	0	0	1
Gm15720	0	0	2	0	0	0	0
Zfp536	0	0	7	0	0	0	0
Gm13162	0	0	7	0	0	0	0
Ets1	0	0	14	0	0	0	0
Pgp	0	0	2	0	0	0	0
Gm8264	1	0	0	0	0	0	1
Galnt7	0	0	10	0	0	0	0
Tmem39a	0	0	2	0	0	0	0
Kctd10	0	0	3	0	0	0	0
Stra13	0	0	1	0	0	0	0
Carhsp1	0	0	13	0	0	0	0
Sh3bgrl2	0	0	6	0	0	0	0
Hhatl	0	0	3	0	0	0	0
Rps15a	0	0	7	0	0	0	0
Zmiz2	0	0	2	0	0	0	0
Idh3b	0	0	6	0	0	0	0
Pitpnc1	0	0	13	0	0	0	0
Gm12228	0	0	1	0	0	0	0
Smyd3	0	0	6	0	0	0	0
Cd82	0	0	6	0	0	0	0
Fabp4	0	0	2	0	0	0	0
Prr13	0	0	6	0	0	0	0
Ston1	0	0	1	0	0	0	0
Dpys	1	0	0	0	0	0	0
Zfp60	0	0	1	0	0	0	0
Cartpt	0	0	1	0	0	0	0
Enpp2	0	0	2	0	0	0	0
9130401M01Rik	0	0	2	0	0	0	0
Cd300e	0	0	0	0	0	0	7
Slitrk5	0	0	4	0	0	0	0
Dusp2	0	0	2	0	0	0	0
Cse1l	0	0	0	0	0	1	0
0610043K17Rik	0	0	3	0	0	0	0
Rsad2	0	0	0	0	8	0	0
Mtmr12	0	0	5	0	0	0	0
1810063B05Rik	0	0	3	0	0	0	0
Ube2v1	0	0	6	0	0	5	9
Nol11	0	0	6	0	0	0	0
Itfg1	0	0	1	0	0	0	0
Ip6k1	0	0	1	0	0	0	0
Vmp1	0	0	2	0	0	0	0
Prm1	0	0	8	0	0	0	0
Htra2	0	0	1	0	7	0	0
Lmf1	0	0	0	0	7	0	0
Bmpr1b	0	0	9	0	0	0	0
Slx4	0	0	1	0	0	0	0
Gm15766	0	0	1	0	0	0	0
Gm11503	0	0	1	0	0	0	0
Prpsap2	0	0	3	0	0	0	0
Mob4	0	0	26	0	3	0	0
Oaz2	0	0	16	0	0	0	0
Usf1	0	0	14	0	1	0	0
Cotl1	0	0	10	0	0	0	0
Gm3272	0	0	1	0	0	0	0
Adam19	0	0	4	0	0	0	0
Tmem33	0	0	13	0	0	0	0
Unc5a	0	0	4	0	0	0	0
Arid2	1	0	1	0	0	0	0
Phlda3	0	0	2	0	0	0	0
C130039O16Rik	22	0	6	0	0	0	0
Dnmt3b	0	0	9	0	0	0	0
Gm15562	0	0	1	0	0	0	0
Gm4609	0	0	1	0	0	0	0
Gm15985	0	0	0	0	2	0	0
Sspo	0	0	1	0	0	0	0
Gm15816	0	0	9	0	0	0	0
Rab4b	1	0	11	0	0	0	0
Gm13206	0	0	1	0	0	0	0
Slc25a34	0	0	3	0	0	0	0
Lhcgr	0	0	2	0	0	0	0
D6Wsu116e	0	0	2	0	0	0	0
E030030I06Rik	0	0	15	0	0	0	0
Mapk1ip1	0	0	12	0	0	0	0
Il34	0	0	1	0	0	0	0
Exosc5	0	0	3	0	0	0	0
Atg7	0	0	23	0	0	0	0
Cc2d1a	0	0	0	0	4	0	0
Hoxd12	0	0	2	0	0	0	0
Nacc2	0	0	2	0	0	0	0
Scpep1	0	0	5	0	0	0	0
Gm3604	0	0	1	0	0	0	0
Sst	0	0	0	0	0	0	1
Itgb1	0	0	11	0	0	0	0
Arl6ip4	0	0	13	0	0	0	0
Phldb1	0	0	5	0	0	0	0
Micalcl	0	0	7	0	0	0	0
Exd1	0	0	0	0	1	0	0
Dpysl3	0	0	5	0	0	0	0
Raet1c	0	0	33	0	0	0	0
Cxcl11	0	0	0	0	1	0	0
Pla2g5	0	0	2	0	0	0	0
Gm16123	0	0	1	0	0	0	0
0610040B09Rik	0	0	3	0	0	0	0
Gm10135	0	0	4	0	0	0	0
Foxe1	0	0	1	0	0	0	0
BC046401	0	0	2	0	0	0	0
Neb	0	0	1	0	0	0	0
Klhdc8b	0	0	1	0	0	0	0
Agpat6	0	0	20	0	0	0	0
Calcoco2	0	0	1	0	0	0	0
AC099599.1	0	0	1	0	0	0	0
Slc39a11	0	0	2	0	0	0	0
2010107E04Rik	0	0	0	0	1	0	0
Suv39h2	0	0	13	0	0	0	0
Synb	0	0	2	0	0	0	0
Gm10643	0	0	0	0	3	0	0
Sergef	0	0	0	0	0	0	2
Gm12571	0	0	1	0	1	0	0
Acvrl1	0	0	19	0	0	0	0
Gm8508	0	0	2	0	0	0	0
Scaf1	0	0	1	0	2	0	0
Plekha5	0	0	16	0	0	0	0
Prkcq	0	0	2	0	0	0	0
Fam69a	0	0	2	0	0	0	0
Jkamp	0	0	3	0	0	0	0
Tspan31	0	0	18	0	0	0	0
Arhgap26	0	0	0	0	0	0	3
Tuba3b	0	0	1	0	0	0	0
ORF63	0	0	4	0	0	0	0
BC048671	0	0	2	0	0	0	0
Sec24c	3	0	18	0	0	0	0
Gm12360	0	0	1	0	0	0	0
Gm15198	0	0	6	0	0	0	0
Gm8615	0	0	1	0	0	0	0
1810030N24Rik	0	0	1	0	0	0	0
Prss50	0	0	4	0	0	0	0
Entpd8	0	0	1	0	0	0	0
Mreg	0	0	3	0	2	0	0
Dbx2	0	0	3	0	0	0	0
Armcx2	0	0	0	0	0	0	1
Ppp4c	0	0	2	0	0	0	0
Insm2	0	0	0	0	1	0	0
Pik3r2	0	0	2	0	0	0	0
Riok2	0	0	1	0	0	0	0
Spg7	0	0	31	0	0	0	0
Ptrh2	0	0	1	0	0	0	0
Gm6834	0	0	4	0	0	0	0
Gm15832	0	0	1	0	1	0	0
Nppa	0	0	9	0	0	0	0
Gm11712	0	0	2	0	0	0	0
4930442H23Rik	0	0	6	0	0	0	0
Chmp2a	0	0	1	0	0	0	0
Carm1	0	0	0	0	2	2	0
Rsrc2	0	0	2	0	0	0	0
Mpp5	0	0	3	0	0	0	0
Defb25	0	0	1	0	0	0	0
Inpp5k	0	0	4	0	0	0	0
Lrrc59	0	0	3	0	0	0	0
Tfpi	0	0	0	0	2	0	5
BC005561	0	0	1	0	0	0	0
Zfp664	0	0	1	0	0	0	0
Fzd3	0	0	0	0	1	0	0
Ubac2	4	0	29	0	0	0	0
Pomc	0	0	6	0	0	0	0
Mtap1b	0	0	1	0	0	0	0
Pex7	0	0	1	0	0	0	0
Ncl	0	0	5	0	0	0	0
Capn10	0	0	2	0	5	0	0
Ctnnbip1	0	0	4	0	0	0	0
Ldlrap1	0	0	0	0	4	0	0
Arfgap3	0	0	1	0	0	0	0
Dlx1as	1	0	2	0	0	0	0
Rnf34	0	0	22	0	1	0	0
Dhx40	0	0	4	0	0	0	0
Pigs	0	0	2	0	3	0	0
Prdx6	3	0	0	0	0	0	0
Slc25a17	0	0	0	0	2	0	0
Loxl1	0	0	0	0	2	0	0
Cltc	0	0	4	0	0	0	0
Mpst	0	0	0	0	0	0	6
0610009D07Rik	0	0	11	0	0	0	0
Cpt1a	0	0	10	0	0	0	0
Trit1	9	0	1	0	0	0	0
Atf7ip	0	0	10	0	3	0	0
Ahctf1	0	0	4	0	0	0	0
Fntb	0	0	2	0	0	0	0
Plekhm2	0	0	3	0	0	0	0
2410022L05Rik	0	0	0	0	1	0	6
Cradd	0	0	0	0	22	0	0
Triobp	0	0	6	0	0	0	0
Dnajc21	0	0	2	0	0	0	0
Vegfa	0	0	7	0	5	0	0
Hmcn2	0	0	4	0	0	0	0
Gm12338	0	0	3	0	0	0	0
Abcc4	0	0	1	0	0	0	0
Ptprg	0	0	2	0	0	0	0
Fam109b	0	0	1	0	0	0	0
Irak2	0	0	3	0	0	0	0
Med21	0	0	7	0	0	0	0
E130307A14Rik	0	0	6	0	0	0	0
Tbc1d21	0	0	0	0	1	0	0
Lsm4	0	0	3	0	0	0	0
Nt5c	0	0	0	0	1	0	8
Gabpb2	0	0	4	0	0	0	3
Snip1	0	0	6	0	0	0	0
Rpsa	0	0	11	0	0	0	0
Tmem214	0	0	9	0	0	0	0
Tmbim4	0	0	2	0	0	0	0
Pdap1	0	0	16	0	0	0	0
Itm2b	0	0	4	0	0	0	0
2210411K11Rik	0	0	1	0	0	0	0
Adh1	0	0	6	0	0	0	0
Gm15658	0	0	3	0	0	0	0
Gm13071	0	0	1	0	0	0	0
Foxo6	0	0	3	0	0	0	0
D2Wsu81e	0	0	3	0	0	0	0
Gm2302	0	0	2	0	0	0	0
Tnfrsf8	0	0	3	0	6	0	0
Atp6v0a4	0	0	0	0	7	0	0
Hnrnph1	0	0	8	0	0	0	0
Sema4f	0	0	0	0	5	0	0
Mir145	1	0	0	0	0	0	0
A230009B12Rik	0	0	0	0	3	0	0
5730596B20Rik	0	0	1	0	0	0	0
5730457N03Rik	0	0	1	0	0	0	0
Adcy7	0	0	14	0	0	0	15
Cdk19	0	0	11	0	0	0	0
Gart	1	0	16	0	0	0	0
B3gnt9	0	0	0	0	4	0	0
Scgb3a2	0	0	1	0	0	0	0
Cabp7	0	0	1	0	0	0	0
Trim67	0	0	1	0	0	0	0
Serpina3j	0	0	0	0	0	0	1
Pold1	0	0	5	0	1	0	0
A630001G21Rik	0	0	1	0	0	0	0
Hhipl1	0	0	5	0	0	0	0
Nif3l1	0	0	5	0	0	0	0
Rp9	0	0	1	0	2	0	0
Comtd1	1	0	1	0	12	0	0
Zdhhc19	0	0	12	0	0	0	0
5033417F24Rik	0	0	1	0	2	0	0
Ticam2	0	0	0	0	4	0	0
Ascc3	0	0	1	0	0	0	0
Gm9897	0	0	2	0	0	0	0
Snx25	0	0	2	0	1	0	0
Polr1b	0	0	0	0	0	0	7
Mll5	0	0	8	0	0	0	0
Gm11706	0	0	1	0	0	0	0
Gm11435	0	0	0	0	0	0	4
Gm6142	0	0	1	0	0	0	0
Srxn1	0	0	4	0	0	0	0
Gm13038	0	0	1	0	0	0	0
Gm3355	0	0	21	0	5	0	0
Akt2	0	0	9	0	12	0	0
Sugp1	0	0	28	0	0	0	0
Atox1	0	0	2	0	0	0	0
Tfap2a	0	0	2	0	0	0	0
Cmtm7	0	0	6	0	0	0	0
Gt(ROSA)26Sor	0	0	6	0	0	0	0
Rps6kb2	0	0	1	0	6	0	0
Als2	0	0	0	0	2	0	0
Zdhhc12	0	0	3	0	0	0	0
Dnmt3l	0	0	1	0	0	0	0
Zfp30	0	0	3	0	0	0	0
Adam30	0	0	5	0	0	0	0
Ogfr	0	0	0	0	1	0	0
Gm15351	0	0	0	0	1	0	0
Aebp2	0	0	17	0	0	0	0
Plekha7	0	0	6	0	0	0	0
Lias	0	0	1	0	0	0	0
Reep1	0	0	1	0	0	0	0
Gm9851	0	0	6	0	0	0	0
E2f4	0	0	4	0	3	0	0
Zc3hav1	0	0	2	0	4	0	0
Tomm70a	0	0	17	0	3	0	0
Eya1	0	0	2	0	0	0	0
Csf2rb2	0	0	0	0	0	0	5
Nrbp2	0	0	2	0	0	0	0
BC004004	0	0	4	0	0	0	0
Spc25	0	0	0	0	1	0	12
Gm11716	0	0	1	0	0	0	0
Atp2c2	0	0	4	0	0	0	0
H2	0	0	1	0	0	0	0
Slc25a29	0	0	15	0	0	0	0
4931429I11Rik	0	0	4	0	0	0	0
Gm17591	0	0	3	0	3	0	0
Tipin	0	0	17	0	5	0	5
Foxg1	0	0	10	0	0	0	0
6230427J02Rik	0	0	1	0	0	0	0
Treml2	0	0	1	0	1	0	0
Stac	0	0	1	0	0	0	0
Mudeng	0	0	1	0	0	0	0
Uchl4	0	0	12	0	3	0	5
Rps15	0	0	7	0	0	0	0
Tmem25	0	0	5	0	0	0	0
Banf2	0	0	1	0	0	0	0
Camta1	0	0	4	0	0	0	0
Snhg9	0	0	1	0	0	0	0
Tmem50b	1	0	23	0	0	0	0
Cap1	9	0	0	0	0	0	0
Slc2a7	0	0	1	0	0	0	0
Nradd	0	0	5	0	0	0	0
Dhrs3	0	0	0	0	4	0	0
Ksr1	0	0	47	0	0	0	0
Aamp	0	0	12	0	0	0	0
Gm15541	0	0	1	0	0	0	0
Gm13002	0	0	1	0	0	0	0
Zfp212	0	0	17	0	0	0	0
Tnfrsf13c	0	0	4	0	0	0	0
Zfp85	0	0	1	0	0	0	0
Gm5871	0	0	1	0	0	0	0
Csde1	0	0	1	0	0	0	0
Ube4a	0	0	18	0	0	0	0
Gm11960	0	0	1	0	0	0	0
SNORA40	0	0	5	0	0	0	0
Soat2	0	0	6	0	0	0	0
Ccdc37	0	0	3	0	1	0	0
AC122218.1	0	0	4	0	0	0	0
Sh3tc2	1	0	0	0	0	0	0
Phox2b	0	0	5	0	0	0	0
Pum2	8	0	0	0	0	0	0
Pnkp	0	0	0	0	2	0	0
Mrpl13	0	0	2	0	0	0	0
Gm13298	0	0	0	0	9	0	6
Gm216	0	0	11	0	0	0	0
Adamts2	0	0	2	0	0	0	0
Tmem54	0	0	5	0	0	0	0
Mir144	0	0	1	0	0	0	0
Gm17119	0	0	2	0	0	0	0
Traf5	0	0	1	0	0	0	0
Eme1	0	0	2	0	0	0	0
Ndor1	0	0	2	0	0	0	0
Mef2b	0	0	24	0	0	0	0
Znrf3	0	0	3	0	0	0	0
Dctn1	0	0	4	0	7	0	0
Snora28	0	0	0	0	4	0	0
Slc43a1	0	0	0	0	21	0	2
Gm15122	0	0	5	0	0	0	0
Mtif3	0	0	3	0	0	0	0
Abl1	0	0	11	0	1	0	0
Pus7	0	0	12	0	0	0	0
Mtap1s	0	0	1	0	0	0	0
Gm16278	0	0	0	0	6	0	0
Mlh3	0	0	2	0	0	0	0
Polr2f	0	0	8	0	0	0	0
Rcbtb2	0	0	4	0	0	0	0
Tm9sf4	0	0	9	0	0	0	0
Zfyve16	0	0	3	0	0	0	0
Gm14400	0	0	1	0	0	0	0
Gpnmb	1	0	1	0	0	0	0
Fkbp8	0	0	8	0	0	0	0
Gm10043	0	0	13	0	0	0	0
Stc1	0	0	4	0	0	0	0
Eif4g3	0	0	9	0	0	0	0
Gm17041	0	0	7	0	0	0	0
Ccdc96	0	0	3	0	0	0	0
Stfa2	0	0	0	0	0	0	1
Twf2	0	0	0	0	7	0	0
Gm15982	0	0	0	0	4	0	0
Galntl4	0	0	2	0	0	0	0
BC064078	0	0	0	0	0	0	1
Gm15372	0	0	1	0	0	0	0
Snrnp40	1	0	2	0	0	0	0
Cd53	0	0	1	0	0	0	0
Gm13826	0	0	15	0	0	0	0
4931417E11Rik	0	0	1	0	0	0	0
Slc25a4	0	0	4	0	4	0	0
Ssfa2	0	0	2	0	0	0	0
Rab35	0	0	6	0	0	0	0
Fbll1	0	0	2	0	0	0	0
Vmn2r100	0	0	1	0	0	0	0
Tug1	0	0	11	0	0	0	0
1110006G14Rik	0	0	1	0	0	0	0
Jph4	0	0	0	0	3	0	0
E2f5	0	0	4	0	0	0	0
Zfp872	0	0	0	0	4	0	0
Nr1i2	0	0	4	0	0	0	0
Ctdsp1	0	0	10	0	0	0	0
SNORD16	0	0	3	0	1	0	0
Pfdn5	0	0	7	0	0	0	0
Chchd4	0	0	10	0	0	0	0
Gm3244	0	0	1	0	0	0	0
A030003K02Rik	0	0	1	0	0	0	0
Zfp951	0	0	37	0	0	0	0
Vax2	0	0	1	0	0	0	0
Pip4k2c	0	0	14	0	0	0	0
Gm17306	0	0	1	0	0	0	0
Gm13710	0	0	0	0	2	0	1
Sertad3	0	0	9	0	0	0	0
4831426I19Rik	0	0	3	0	0	0	0
AC156032.1	0	0	0	0	1	0	0
Plaur	0	0	2	0	7	0	0
Gm11991	0	0	1	0	0	0	0
Itsn2	0	0	4	0	0	0	0
Sarm1	0	0	0	0	2	0	0
Tanc1	0	0	1	0	0	0	0
Ces1a	2	0	0	0	0	0	0
Cenpt	0	0	11	0	0	0	0
Psen1	11	0	5	0	0	0	0
Plscr2	0	0	7	0	0	0	0
1700102P08Rik	0	0	1	0	0	0	0
Myh6	0	0	0	0	3	0	0
Sbk2	0	0	1	0	0	0	0
Tfb1m	0	0	2	0	0	0	0
Numb	15	0	5	0	0	0	0
Grm6	0	0	1	0	0	0	0
Wdr91	0	0	1	0	0	0	0
Dusp28	0	0	2	0	4	0	0
Gmpr	0	0	3	0	0	0	0
Gm14412	0	0	2	0	0	0	0
Pdzk1ip1	0	0	2	0	0	0	0
E130201H02Rik	0	0	0	0	0	0	1
Khdrbs3	0	0	4	0	0	0	0
Tpra1	0	0	12	0	1	0	0
Ckap4	0	0	10	0	0	0	0
Mapk14	0	0	3	0	0	0	0
Ankrd44	0	0	27	0	2	0	0
Prm2	0	0	6	0	0	0	0
Mrpl34	0	0	2	0	0	0	0
Zfp71	0	0	1	0	0	0	0
Mmrn1	0	0	2	0	0	0	0
Cog4	0	0	1	0	0	0	0
Banp	0	0	2	0	0	0	0
Capns2	1	0	0	0	0	0	0
Gabrg1	0	0	1	0	0	0	0
Acsl5	0	0	20	0	0	0	0
Odf2l	0	0	1	0	0	0	0
Ces2e	0	0	0	0	1	0	0
Kcnj15	0	0	2	0	0	0	0
Gm16210	0	0	13	0	0	0	0
Gm12123	0	0	7	0	0	0	0
Wdr93	0	0	2	0	0	0	0
Rph3al	0	0	4	0	0	0	0
Smyd5	0	0	10	0	0	0	0
Gm16167	0	0	1	0	0	0	0
AC044807.1	0	0	2	0	0	0	0
Anapc7	0	0	0	0	4	0	0
2500004C02Rik	0	0	7	0	0	0	0
Gnaq	0	0	3	0	0	0	0
Zbtb48	0	0	10	0	0	0	0
Gm16001	0	0	5	0	0	0	0
2410080I02Rik	0	0	5	0	0	0	0
9930038K12Rik	0	0	1	0	0	0	0
Gm11682	0	0	1	0	0	0	0
Tmc6	0	0	6	0	0	0	0
R3hdm2	0	0	3	0	0	0	0
Gm10401	0	0	15	0	0	0	0
Nagk	0	0	1	0	0	0	0
BC060267	0	0	1	0	0	0	0
Tmem151b	0	0	1	0	0	0	0
Mfap4	0	0	8	0	0	0	0
C130036L24Rik	0	0	2	0	0	0	0
Cdhr2	0	0	1	0	0	0	0
Sycn	0	0	2	0	0	0	0
Gm7236	0	0	1	0	0	0	0
Actr5	0	0	5	0	0	0	0
Gm20554	0	0	1	0	0	0	0
Prdx5	0	0	12	0	0	0	0
Tspan17	0	0	5	0	0	0	0
Xab2	0	0	7	0	0	0	0
Srl	0	0	1	0	0	0	0
Matn3	1	0	0	0	0	0	0
1810008A18Rik	0	0	0	0	7	0	0
Nfat5	0	0	1	0	3	0	0
Snx20	0	0	7	0	0	0	6
Sec63	0	0	9	0	1	0	0
Dot1l	0	0	7	0	0	0	0
Gm17141	0	0	2	0	0	0	0
Mex3c	0	0	2	0	0	0	0
Fam84b	0	0	1	0	0	0	0
Fanci	0	0	1	0	0	0	0
Gadd45b	0	0	2	0	0	0	0
Glce	4	0	6	0	0	0	0
Lcat	0	0	8	0	0	0	0
Thumpd1	0	0	1	0	0	0	0
Arl15	0	0	6	0	0	0	0
Mtbp	0	0	5	0	0	0	0
Fam113a	0	0	6	0	0	0	0
Eef1d	0	0	2	0	0	0	0
Psmd7	0	0	3	0	4	0	0
Fam161b	6	0	5	0	0	0	0
Vpreb1	0	0	2	0	0	0	0
Pfn4	0	0	2	0	0	0	0
Cul2	0	0	3	0	0	0	0
Cpeb1	0	0	1	0	0	0	0
Wdr25	0	0	10	0	0	0	0
Slc35b4	0	0	2	0	0	0	0
4930426D05Rik	0	0	3	0	0	0	0
Gm15458	0	0	5	0	0	0	0
Vps13d	0	0	5	0	9	0	0
Fto	0	0	13	0	0	0	0
Lss	0	0	4	0	0	0	0
Snord7	0	0	0	0	0	0	1
Gm10101	0	0	1	0	0	0	0
Stx6	3	0	0	0	0	0	0
RP24	0	0	8	0	0	0	0
Tbc1d23	0	0	19	0	4	0	0
Gm13818	0	0	5	0	0	0	0
Mrpl2	0	0	16	0	0	0	0
Eml5	1	0	2	0	0	0	0
Slc35e2	0	0	3	0	0	0	0
Pnpla6	0	0	6	0	0	0	0
Casc1	0	0	3	0	0	0	0
Smarcd2	0	0	1	0	0	0	0
Mettl10	0	0	12	0	0	0	0
Aplnr	0	0	0	0	8	0	0
Tbc1d1	0	0	8	0	0	0	0
Plcxd3	0	0	1	0	0	0	0
Gm6963	1	0	14	0	0	0	0
Bckdhb	0	0	2	0	0	0	0
Gm17284	2	0	0	0	0	0	0
Ubxn2a	0	0	21	0	0	0	0
Cux1	0	0	13	0	0	0	0
Gm15518	0	0	5	0	0	0	0
Gm20388	0	0	1	0	0	0	0
Gm13157	0	0	4	0	0	0	0
Itpr2	0	0	5	0	0	0	0
Slc35c2	0	0	6	0	0	0	0
Ppp1r7	0	0	2	0	2	0	0
1700008P20Rik	0	0	1	0	2	0	0
Dab2ip	0	0	9	0	1	0	0
Rbbp5	0	0	0	0	10	0	0
Gm11517	0	0	0	0	0	0	1
1700092K14Rik	0	0	1	0	0	0	0
Zfp472	0	0	1	0	0	0	0
Dupd1	0	0	1	0	1	0	0
BC051019	0	0	2	0	0	0	0
Tmed2	0	0	9	0	0	0	0
Gm16740	0	0	2	0	1	0	6
Gm9705	0	0	1	0	0	0	0
Fyb	0	0	0	0	0	0	14
Sos1	1	0	0	0	0	0	0
Zfp651	0	0	9	0	0	0	0
Tmem14c	0	0	3	0	0	0	0
Spry2	0	0	8	0	0	0	0
Olfml3	0	0	5	0	0	0	0
Chrac1	0	0	1	0	0	0	0
Uroc1	0	0	1	0	1	0	0
Myoz1	0	0	3	0	0	0	0
Lrrcc1	0	0	2	0	0	0	0
Lamtor3	1	0	4	0	0	0	0
Pacrg	0	0	0	0	1	0	0
Gm16494	0	0	4	0	0	0	0
Slc6a17	0	0	16	0	0	0	0
Agpat3	0	0	4	0	0	0	0
Gm8540	0	0	2	0	0	0	0
Tubd1	0	0	1	0	0	0	0
Gm12447	0	0	2	0	0	0	0
Tbc1d20	0	0	5	0	0	0	0
Dpm1	0	0	0	0	6	0	0
Esrrb	0	0	1	0	0	0	0
Fam168a	0	0	0	0	0	0	7
Il31ra	0	0	0	0	3	0	0
Tmem81	0	0	0	0	10	0	0
Trim66	0	0	2	0	0	0	0
Erlin1	0	0	4	0	0	0	0
2810468N07Rik	0	0	0	0	5	0	0
Sytl3	0	0	1	0	0	0	0
Nudcd3	0	0	2	0	0	0	0
Ptdss2	0	0	0	0	0	0	1
4933431E20Rik	0	0	5	0	0	0	0
Sumo1	0	0	0	0	2	0	0
Utp20	2	0	1	0	0	0	0
Myl4	2	0	2	0	0	0	0
Smad4	0	0	23	0	0	0	0
Ak1	0	0	12	0	1	0	0
Cpne7	0	0	16	0	0	0	0
Col27a1	0	0	8	0	0	0	0
AL732585.1	0	0	1	0	0	0	0
Fbxo42	0	0	6	0	3	0	0
Mertk	0	0	3	0	0	0	0
Vstm2a	0	0	0	0	5	0	0
4932438H23Rik	0	0	2	0	0	0	0
Zic1	0	0	8	0	0	0	0
Serinc1	0	0	2	0	1	0	4
Gm12304	0	0	1	0	0	0	0
2310046A06Rik	0	0	7	0	0	0	0
Rps10	0	0	14	0	0	0	23
Tmem229b	0	0	1	0	0	0	0
Gm7932	3	0	3	0	0	0	0
Serpina3c	1	0	0	0	0	0	2
AL669855.1	0	0	2	0	0	0	0
Hspg2	0	0	11	0	0	0	0
Gpr31c	0	0	3	0	0	0	0
D030016E14Rik	0	0	2	0	0	0	0
SNORA43	0	0	3	0	0	0	0
Hif1an	3	0	2	0	0	0	0
Gm13016	0	0	1	0	0	0	0
Acot5	11	0	0	0	0	0	0
Shprh	0	0	14	0	0	0	0
Slc4a8	0	0	8	0	0	0	0
Spen	0	0	4	0	5	0	0
Klhl21	0	0	13	0	0	0	0
Gm13238	0	0	2	0	0	0	0
Slc6a6	0	0	12	0	0	0	0
Pafah1b2	0	0	2	0	0	0	0
Myh9	0	0	0	0	0	0	2
Gm13212	0	0	13	0	4	0	0
Rheb	0	0	17	0	0	0	0
Gm16630	0	0	1	0	0	0	0
Zbtb7a	0	0	9	0	0	0	0
Arf3	0	0	0	0	3	0	0
Sf3b3	0	0	1	0	0	0	0
Tmem97	0	0	2	0	3	0	0
Hoxa9	0	0	1	0	0	0	0
9330171B17Rik	0	0	2	0	0	0	0
Fam149b	0	0	12	0	0	0	0
Gm12343	0	0	1	0	0	0	0
Tcf25	0	0	6	0	0	0	0
Dpm2	0	0	11	0	1	0	0
Rars	0	0	12	0	0	0	0
Tnfrsf13b	0	0	1	0	0	0	0
Plscr1	0	0	7	0	0	0	0
Gm4596	0	0	1	0	0	0	0
CT030161.2	0	0	1	0	0	0	0
Arl16	0	0	1	0	1	0	0
Crem	0	0	14	0	0	0	0
Fam98b	0	0	2	0	0	0	0
Gm6254	0	0	8	0	0	0	0
Rexo1	0	0	5	0	0	0	0
Pole4	0	0	0	0	6	0	0
Gm16626	0	0	1	0	0	0	0
Sumo3	0	0	2	0	8	0	0
Pdia5	0	0	1	0	0	0	0
Gm17561	0	0	1	0	0	0	0
Gm14320	0	0	0	0	0	0	2
Tsc2	0	0	2	0	0	0	0
Cyp2t4	0	0	9	0	0	0	0
AW549877	0	0	5	0	0	0	0
Gm13225	0	0	0	0	1	0	0
Smok2a	0	0	1	0	0	0	0
1500011B03Rik	0	0	12	0	0	0	0
Eif4a2	0	0	6	0	0	0	0
Mrgprh	0	0	3	0	0	0	0
1700067K01Rik	0	0	0	0	2	0	0
Leprot	0	0	5	0	0	0	0
Lamc3	0	0	5	0	0	0	0
Gm14284	0	0	0	0	5	0	3
Rg9mtd2	1	0	6	0	0	0	0
Zfp428	0	0	2	0	8	0	0
Gm8865	0	0	0	0	2	0	0
Trmt2b	0	0	0	0	0	0	4
0610012G03Rik	0	0	1	0	0	0	0
Mmp7	0	0	1	0	0	0	0
Galt	0	0	0	0	24	0	12
Nanos3	0	0	0	0	3	0	0
Kcnn4	0	0	2	0	1	0	0
E430025E21Rik	0	0	3	0	0	0	0
2210016F16Rik	0	0	0	0	1	0	0
Gm17040	0	0	11	0	0	0	0
Gm13666	0	0	2	0	0	0	0
Gm19459	0	0	6	0	3	0	0
Gm13614	0	0	0	0	0	0	3
Rab44	0	0	5	0	0	0	0
Gm6630	0	0	4	0	0	0	0
Taf1d	0	0	4	0	0	0	0
Mki67ip	0	0	3	0	0	0	0
Gm11790	0	0	1	0	0	0	0
Pgs1	0	0	15	0	0	0	0
Stk25	0	0	1	0	1	0	0
Aars2	0	0	5	0	4	0	0
Klrd1	0	0	0	0	0	0	1
Gm5619	0	0	0	0	1	0	0
4833420G17Rik	0	0	11	0	0	0	0
Armc10	0	0	5	0	0	0	0
Gm10737	0	0	1	0	0	0	0
Rab34	0	0	2	0	3	0	0
Pmm1	0	0	2	0	0	0	0
Dedd	0	0	43	0	2	0	0
Tjp3	0	0	9	0	0	0	0
Lrsam1	0	0	9	0	0	0	0
Gm16270	0	0	0	0	1	0	0
6330503K22Rik	0	0	3	0	0	0	0
Gm9924	0	0	1	0	0	0	0
Cxcr1	0	0	7	0	0	0	0
Gm15892	0	0	1	0	0	0	0
BC049715	0	0	6	0	1	0	0
Gm11346	0	0	1	0	0	0	0
Ndufs7	0	0	7	0	0	0	0
Prrg2	0	0	0	0	1	0	0
4732471D19Rik	0	0	1	0	0	0	0
Pfkl	0	0	5	0	0	0	0
Gm17515	0	0	2	0	0	0	0
Tmem189	0	0	6	0	0	4	9
AA987161	0	0	1	0	0	0	0
Hoxa6	0	0	1	0	0	0	0
Fam166a	0	0	2	0	0	0	0
E130317F20Rik	0	0	6	0	0	0	0
Alpl	0	0	10	0	0	0	0
Scarna10	0	0	1	0	2	0	0
Atp6v0e2	3	0	4	0	0	0	0
Rrp36	0	0	16	0	0	0	0
AC159474.1	0	0	3	0	0	0	1
C130022K22Rik	0	0	13	0	0	0	0
Slc22a22	0	0	1	0	0	0	0
Map3k10	0	0	1	0	0	0	0
Gbp5	0	0	1	0	0	0	0
Cmtm3	0	0	1	0	0	0	0
Csda	0	0	0	0	0	0	3
Dnajc28	1	0	22	0	0	0	0
Gm13184	0	0	3	0	0	0	0
Wdyhv1	0	0	2	0	0	0	0
Ppp1r27	0	0	1	0	0	0	0
Mex3b	0	0	1	0	0	0	0
Tgm2	0	0	12	0	0	0	0
Serpina3m	0	0	0	0	0	0	2
1110065P20Rik	0	0	5	0	0	0	0
Dad1	0	0	0	0	2	0	0
Ctdp1	0	0	1	0	0	0	0
Dbil5	0	0	3	0	0	0	0
Gm16166	0	0	1	0	0	0	0
Hbs1l	4	0	6	0	0	0	0
Fam175b	0	0	12	0	0	0	0
Clk1	0	0	6	0	0	0	0
Mcm2	0	0	11	0	0	0	0
Mepce	0	0	1	0	0	0	0
Usp49	0	0	0	0	0	0	2
Gm11199	0	0	15	0	0	0	0
Rnf149	0	0	3	0	4	0	0
Serpina1c	1	0	1	0	0	0	0
6030458C11Rik	0	0	2	0	0	0	0
Ms4a6b	0	0	0	0	0	0	6
Mir3082	0	0	0	0	3	0	0
1700019E19Rik	6	0	5	0	0	0	0
Plekhg3	0	0	2	0	0	0	0
Ifltd1	0	0	1	0	0	0	0
1700013G23Rik	0	0	0	0	2	0	0
Ergic3	0	0	3	0	0	0	0
Map3k12	0	0	3	0	0	0	0
Gm8840	0	0	1	0	0	0	0
Rhob	3	0	0	0	0	0	0
Trappc2l	0	0	5	0	0	0	0
Oxtr	0	0	1	0	0	0	0
Myst2	0	0	4	0	0	0	0
Vps4b	0	0	7	0	0	0	0
Uck1	0	0	4	0	1	0	0
Crtc1	0	0	11	0	0	0	0
Dapk3	0	0	9	0	0	0	0
Dyrk1a	0	0	5	0	0	0	0
Gm13247	0	0	3	0	0	0	0
Bcas2	0	0	7	0	0	0	0
2310011J03Rik	0	0	5	0	0	0	0
Tpt1	0	0	1	0	0	0	0
Gm10382	0	0	4	0	0	0	0
Acbd5	0	0	3	0	0	0	0
Gm11204	0	0	2	0	0	0	0
Alox5ap	0	0	2	0	0	0	0
Gm10529	1	0	0	0	0	0	0
Akr1b3	0	0	2	0	0	0	0
Gm9881	0	0	6	0	0	0	0
Trem1	0	0	2	0	0	0	0
Prickle4	0	0	0	0	0	0	1
Ephb2	0	0	16	0	0	0	1
Rnf126	0	0	6	0	0	0	0
Gm10822	0	0	1	0	0	0	0
Slc27a5	0	0	1	0	0	0	0
Pop4	0	0	1	0	0	0	0
Arid4b	0	0	0	0	1	0	0
D4Ertd22e	0	0	6	0	6	0	0
Psmc1	0	0	5	0	0	0	0
1700019B03Rik	0	0	2	0	0	0	0
Synpo	0	0	0	0	0	0	1
Smad7	0	0	0	0	1	0	0
Gm11649	0	0	2	0	0	0	0
Dffa	0	0	8	0	0	0	0
Bud13	0	0	2	0	0	0	0
AL671173.1	0	0	1	0	0	0	0
Gm16348	0	0	0	0	0	0	1
Gm5616	0	0	0	0	0	0	1
Gm16739	0	0	2	0	0	0	0
Cyr61	0	0	5	0	0	0	0
Il21r	0	0	1	0	0	0	0
Tnn	1	0	0	0	0	0	0
Gm14420	0	0	1	0	0	0	0
Mllt1	0	0	3	0	0	0	0
Tac4	0	0	1	0	0	0	0
Gm11974	0	0	1	0	0	0	0
9130020K20Rik	0	0	3	0	0	0	0
Dnase1l3	0	0	0	0	9	0	0
Zfp418	0	0	2	0	0	0	0
Hoxb1	0	0	1	0	0	0	0
Snora78	0	0	1	0	0	0	0
Fibcd1	0	0	2	0	0	0	0
ORF61	0	0	7	0	0	0	0
Mat2a	0	0	3	0	0	0	0
Rnf125	0	0	2	0	0	0	0
Clp1	0	0	0	0	20	0	6
1110017D15Rik	0	0	0	0	15	0	8
Ociad1	0	0	3	0	0	0	0
Gm12516	0	0	0	0	1	0	0
Pafah2	0	0	7	0	2	0	1
Srp54c	0	0	0	0	7	0	0
5330411J11Rik	0	0	1	0	0	0	0
Gm10433	0	0	3	0	0	0	0
Prpf40b	0	0	0	0	6	0	0
Josd2	0	0	1	0	0	0	0
Vldlr	24	0	0	0	0	0	0
Tlx2	0	0	0	0	6	0	0
Plcg1	0	0	1	0	0	0	0
Tas1r3	0	0	5	0	0	0	0
Rnf181	0	0	5	0	0	0	0
Gm12891	5	0	0	0	0	0	0
Mir2861	0	0	1	0	1	0	0
Gm12195	0	0	2	0	0	0	0
Ccdc107	0	0	1	0	0	0	0
CAAA01037531.1.36077.1	0	0	1	0	0	0	0
Phb	0	0	3	0	0	0	0
Cplx3	0	0	1	0	0	0	0
Klhdc4	0	0	2	0	0	0	0
Ipo7	2	0	0	0	0	0	0
Gm128	0	0	3	0	0	0	0
Ralgapb	0	0	5	0	0	0	0
Sidt2	0	0	2	0	0	0	0
Klf15	0	0	2	0	1	0	0
Tbx2	0	0	4	0	0	0	0
Gm13819	0	0	7	0	0	0	0
Gm14253	0	0	4	0	0	0	0
Gm13477	0	0	1	0	0	0	0
Gm12986	0	0	5	0	0	0	1
AA960436	0	0	0	0	4	0	0
Zbtb40	0	0	8	0	0	0	1
2010107H07Rik	0	0	3	0	0	0	0
Pkp4	0	0	4	0	0	0	0
Bola3	0	0	7	0	6	0	0
Gm3191	0	0	1	0	0	0	0
Fstl3	0	0	5	0	0	0	0
Synm	0	0	0	0	4	0	0
Kif23	1	0	2	0	0	0	0
Ccdc69	0	0	4	0	0	0	0
Mrpl33	0	0	3	0	0	0	0
Casp6	0	0	19	0	0	0	0
Nup153	0	0	13	0	0	0	0
Cplx2	0	0	2	0	0	0	0
Vps37a	1	0	1	0	0	0	0
1500009C09Rik	0	0	1	0	0	0	0
C030039L03Rik	0	0	2	0	0	0	0
Mir687	0	0	2	0	0	0	0
Cebpa	0	0	2	0	0	0	0
Rrp7a	0	0	4	0	0	0	0
Disp2	0	0	12	0	0	0	0
Zfp68	0	0	7	0	0	0	0
Cox5a	0	0	1	0	0	0	0
Pdgfrb	0	0	4	0	0	0	18
Gm8122	0	0	1	0	0	0	0
Ddx56	0	0	2	0	0	0	0
Bahcc1	0	0	0	0	3	0	0
Cwf19l2	0	0	16	0	0	0	0
Mup	0	0	1	0	0	0	0
1700066J24Rik	0	0	0	0	4	0	2
Ptplad1	0	0	0	0	0	0	2
Mllt11	0	0	5	0	0	0	1
Nudt19	0	0	2	0	0	0	0
1500012F01Rik	0	0	0	0	0	1	0
Rbm34	0	0	4	0	0	0	0
Cd69	0	0	0	0	0	0	4
Slc39a2	0	0	1	0	0	0	0
Isca2	0	0	10	0	0	0	0
2510046G10Rik	0	0	3	0	0	0	0
1600027N09Rik	0	0	0	0	1	0	0
Eng	0	0	13	0	1	0	0
Zbtb45	0	0	1	0	0	0	0
Gfra4	0	0	2	0	3	0	3
Gm13724	0	0	3	0	0	0	0
D14Ertd449e	0	0	22	0	0	0	0
Gm9797	0	0	14	0	0	0	0
Blnk	0	0	4	0	0	0	0
Car2	0	0	3	0	0	0	0
Iqcc	0	0	1	0	0	0	0
Mospd4	0	0	0	0	2	0	0
Anxa3	0	0	1	0	0	0	0
Mad2l1bp	0	0	3	0	0	0	0
3300002A11Rik	0	0	1	0	0	0	0
Ptcd3	0	0	7	0	0	0	0
Srsf3	0	0	7	0	0	0	0
Spib	0	0	1	0	0	0	0
Ambp	0	0	4	0	0	0	0
Rps12	0	0	0	0	0	0	1
2210012G02Rik	0	0	0	0	0	9	0
Sds	0	0	1	0	1	0	1
Trbv19	0	0	3	0	0	0	0
Oaz1	0	0	5	0	0	0	0
Tmem43	0	0	8	0	0	0	0
Cyp4a31	0	0	3	0	0	0	0
Lmcd1	0	0	2	0	0	0	0
Bdh1	0	0	2	0	0	0	0
Gm15782	2	0	0	0	0	0	0
Gm11534	0	0	1	0	0	0	0
Tcf3	0	0	5	0	0	0	0
Vgll4	0	0	28	0	0	0	0
Nfs1	0	0	3	0	0	0	0
Gm15495	0	0	2	0	0	0	0
Gm10715	0	0	2	0	0	0	0
Afg3l1	0	0	5	0	0	0	0
9430008C03Rik	0	0	4	0	0	0	0
Ttc23l	0	0	1	0	0	0	0
Pitx2	0	0	4	0	0	0	0
AI662270	0	0	0	0	0	0	1
Telo2	0	0	2	0	2	0	0
Fam20b	0	0	0	0	1	0	0
Gm15906	0	0	1	0	0	0	0
Gm13047	0	0	4	0	4	0	0
D10Jhu81e	0	0	3	0	0	0	0
Fam173a	0	0	0	0	7	0	0
St3gal1	0	0	23	0	3	0	0
Slc28a1	0	0	11	0	0	0	0
Lmnb2	0	0	4	0	0	0	0
Gm12345	0	0	2	0	0	0	0
Gm17227	0	0	7	0	0	0	0
Dync2li1	0	0	1	0	0	0	0
Gm13705	0	0	1	0	0	0	0
Plekho1	0	0	0	0	0	0	5
Dok1	0	0	1	0	7	0	0
Edem1	0	0	2	0	0	0	0
Vwa3a	0	0	0	0	0	0	2
Gm11714	0	0	1	0	0	0	0
Gm10343	0	0	7	0	0	0	0
Gm14005	0	0	1	0	0	0	0
Efs	0	0	0	0	5	0	0
AC152826.1	0	0	1	0	0	0	0
Arap1	0	0	1	0	0	0	0
Serpina1b	1	0	1	0	0	0	0
Gm9294	0	0	11	0	0	0	0
Gm15965	0	0	1	0	0	0	0
6720456B07Rik	0	0	6	0	0	0	0
1200016B10Rik	0	0	1	0	0	0	0
Rnf10	0	0	9	0	0	0	0
Cd209b	0	0	1	0	0	0	0
Wdr67	0	0	6	0	0	0	0
Glud1	0	0	1	0	0	0	0
Cym	0	0	2	0	0	0	0
Dcaf7	0	0	2	0	0	0	0
5031425E22Rik	0	0	2	0	0	0	0
Gm20536	0	0	4	0	0	0	0
Magi1	0	0	10	0	0	0	0
Zfp938	38	0	0	0	0	0	0
Siah1a	0	0	3	0	0	0	0
Ptov1	0	0	4	0	2	0	0
2310047B19Rik	0	0	0	0	13	3	0
Acp5	0	0	0	0	9	3	0
Plcb2	0	0	14	0	0	0	1
Tm9sf2	3	0	22	0	0	0	0
Aox3l1	0	0	1	0	0	0	0
Myzap	0	0	2	0	0	0	0
Gm13161	0	0	22	0	0	0	0
B4galt2	1	0	0	0	0	0	0
Ost4	0	0	10	0	0	0	0
Rrp1b	0	0	2	0	0	0	0
1700028P14Rik	0	0	3	0	0	0	0
Supt5h	0	0	8	0	0	0	0
Cpn1	1	0	1	0	0	0	0
Plat	0	0	6	0	0	0	0
2310021P13Rik	2	0	18	0	0	0	0
Fzr1	0	0	12	0	0	0	8
Ugt1a5	0	0	3	0	0	0	0
RP23	0	0	19	0	10	0	5
Gm11537	0	0	0	0	0	0	1
Mir26a	0	0	1	0	0	0	0
Gm13664	0	0	1	0	0	0	0
Rtkn	0	0	1	0	7	0	0
Gm5465	0	0	3	0	0	0	0
Ano2	0	0	0	0	6	0	0
Pip5k1c	0	0	13	0	0	0	5
Gm9268	0	0	1	0	0	0	0
Leng9	0	0	0	0	0	0	6
Usp39	0	0	5	0	0	0	0
Snora3	0	0	2	0	0	0	0
Klhl7	0	0	2	0	0	0	0
Gm15931	0	0	0	0	0	0	3
Gm5529	0	0	3	0	0	0	0
E030010N08Rik	0	0	1	0	1	0	0
Hbxip	0	0	15	0	0	0	0
Uts2r	0	0	1	0	0	0	0
Gm5405	0	0	1	0	0	0	0
Hspa14	0	0	5	0	0	0	0
Gm16731	0	0	1	0	0	0	0
Tars	0	0	1	0	0	0	0
Cd5	0	0	5	0	0	0	0
Gm572	0	3	0	0	0	0	0
AC152453.1	0	0	1	0	0	0	0
Gm14010	0	0	1	0	0	0	0
Impdh2	0	0	1	0	0	0	0
Eral1	0	0	2	0	1	0	0
Fam58b	0	0	23	0	1	0	0
Gm15999	0	0	1	0	0	0	0
Gm3436	0	0	1	0	0	0	0
Iqch	0	0	1	0	0	0	0
Gm10000	0	0	0	0	0	0	1
Slc30a2	0	0	5	0	0	0	0
Lrrc45	0	0	1	0	0	0	0
Zfp316	0	0	4	0	0	0	0
Pira2	0	0	0	0	0	0	4
Mbtps1	0	0	6	0	0	0	0
Zfp579	0	0	1	0	0	0	0
Gm15823	0	0	9	0	0	0	0
Tac1	0	0	3	0	0	0	0
Tmem132b	0	0	2	0	0	0	0
Wfikkn2	0	0	3	0	0	0	0
Hjurp	0	0	1	0	0	0	0
Hoxd3	0	0	6	0	0	0	0
Cd74	0	0	2	0	0	0	9
Rfxank	0	0	30	0	0	0	0
Tbc1d7	0	0	3	0	0	0	0
Kdm1b	0	0	1	0	0	0	0
Adh4	0	0	1	0	0	0	0
Chst12	0	0	0	0	6	0	18
Gm4604	0	0	1	0	0	0	0
Eef2k	0	0	0	0	0	0	12
4930433N12Rik	0	0	2	0	0	0	0
2810459M11Rik	0	0	1	0	0	0	0
Ccr8	0	0	1	0	0	0	0
Scel	1	0	0	0	0	0	0
4930404H24Rik	0	0	3	0	0	0	0
1700037H04Rik	0	0	0	0	5	0	3
Gm11514	0	0	2	0	0	0	0
Lrrc42	0	0	0	0	0	7	0
Adck4	1	0	7	0	0	0	0
Chmp4c	0	0	1	0	0	0	0
Gm266	0	0	0	0	4	0	0
Grpel1	0	0	3	0	0	0	0
AL845455.1	0	0	1	0	0	0	0
Ngdn	0	0	0	0	1	0	0
1700055C04Rik	0	0	1	0	0	0	0
Xrcc6	0	0	5	0	0	0	0
AC159810.1	0	0	1	0	0	0	0
Cnpy3	0	0	15	0	0	0	0
Gimap9	4	0	5	0	0	0	0
Gm9392	0	0	0	0	0	0	2
Gm14491	0	0	0	0	0	3	0
Gm16303	0	0	0	0	3	0	0
Usp10	0	0	7	0	0	0	0
Glrb	0	0	2	0	0	0	0
Bckdha	0	0	3	0	0	0	0
Plxna1	0	0	0	0	7	0	0
Noxa1	0	0	1	0	0	0	0
Mttp	1	0	3	0	0	0	0
Gm5114	0	0	1	0	0	0	0
Lnx1	0	0	0	0	5	0	0
Ube3b	0	0	4	0	0	0	0
Kcnc3	0	0	4	0	0	0	0
Grpel2	1	0	0	0	0	0	0
Gm7363	0	0	0	0	0	0	5
Actr2	0	0	1	0	0	0	0
Slc7a2	0	0	0	0	0	0	1
Ifi44	3	0	0	0	0	0	0
Tmem204	0	0	2	0	0	0	0
Nfkbia	0	0	0	0	8	0	0
Nup85	0	0	0	0	0	0	1
Kcnk5	0	0	10	0	0	0	0
Camk1	0	0	9	0	0	0	0
Mrps34	0	0	2	0	0	0	0
1500035N22Rik	0	0	4	0	0	0	0
Nkx1	0	0	11	0	0	0	0
Fancg	0	0	1	0	0	0	0
Nlrp14	0	0	1	0	0	0	0
Rpl32	0	0	8	0	0	0	0
S100pbp	0	0	13	0	0	0	0
Myo9b	0	0	3	0	0	0	0
Gm13135	0	0	36	0	0	0	0
Trim28	0	0	1	0	0	0	0
Rpl5	0	0	3	0	0	0	0
Chd6	0	0	1	0	0	0	0
Dlx6	0	0	1	0	0	0	0
Zdhhc9	1	0	0	0	0	0	0
Pogz	0	0	1	0	5	0	14
Fam72a	0	0	3	0	0	0	0
Cd37	0	0	0	0	2	0	0
Tmed1	0	0	0	0	2	2	0
Casp8	0	0	3	0	0	0	0
Ppm1g	0	0	7	0	0	0	0
Zfyve21	0	0	2	0	2	0	0
D6Mm5e	0	0	0	0	5	0	0
Dag1	0	0	1	0	0	0	0
Mrpl37	0	0	0	0	0	9	0
Gm15743	0	0	1	0	0	0	0
Lrrc14b	3	0	0	0	0	0	0
Atp5a1	2	0	0	0	0	0	0
2510006D16Rik	0	0	5	0	0	0	0
Gm16503	0	0	39	0	0	0	0
Gm9506	0	0	1	0	0	0	0
Slc6a2	3	0	0	0	0	0	0
Prkch	2	0	0	0	0	0	0
Baat	0	0	0	0	0	0	1
Mmp12	0	0	1	0	0	0	0
Rbm14	0	0	4	0	11	0	0
Gm10653	0	0	1	0	0	0	0
Ogg1	0	0	8	0	0	0	0
Gm19898	0	0	5	0	0	0	0
Gps1	0	0	2	0	0	0	0
Timm10	0	0	0	0	24	0	2
Rpusd2	0	0	13	0	1	0	0
SNORA3	0	0	2	0	0	0	2
Tns1	0	0	10	0	0	0	0
Gm10819	0	0	1	0	0	0	0
Blcap	1	0	2	0	0	0	0
Adcyap1r1	0	0	2	0	0	0	0
Pla2g16	0	0	23	0	0	0	0
Cenpm	0	0	5	0	0	0	0
Il17b	1	0	0	0	0	0	0
Gm10612	0	0	2	0	0	0	0
Prdm2	0	0	1	0	0	0	0
Gm4287	0	0	1	0	0	0	0
Pfkfb2	0	0	1	0	0	0	0
Kcnj1	0	0	1	0	0	0	0
1110054M08Rik	0	0	4	0	0	0	2
Khdrbs1	0	0	3	0	0	0	0
Rpl18a	0	0	4	0	7	0	0
Actb	0	0	1	0	0	0	0
Pggt1b	0	0	0	0	4	0	0
Ftsj3	0	0	1	0	0	0	0
Cox6b2	0	0	1	0	0	0	0
Dll3	0	0	1	0	0	0	0
Vps53	0	0	4	0	0	0	0
Gm14409	0	0	1	0	0	0	0
Rnf123	0	0	1	0	0	0	0
N4bp2l2	0	0	2	0	0	0	0
Lmbr1	0	0	2	0	0	0	0
4930481B07Rik	0	0	3	0	1	0	6
Gm13551	0	0	1	0	0	0	0
Nmb	0	0	23	0	0	0	0
Snord42b	0	0	1	0	0	0	0
Phf12	0	0	2	0	1	0	0
Cd52	0	0	14	0	0	0	1
Guca1a	0	0	0	0	3	0	0
Ccdc141	0	0	1	0	0	0	0
Gm5566	0	0	1	0	0	0	0
Mup5	0	0	1	0	1	0	0
Nf1	0	0	31	0	0	0	0
Cbs	0	0	0	0	4	0	0
Wdhd1	0	0	5	0	0	0	0
Cnksr3	0	0	14	0	0	0	0
Vmn1r2	0	0	2	0	0	0	0
Tmem173	0	0	1	0	0	0	0
Ccdc12	0	0	7	0	0	0	0
Ppm1a	0	0	4	0	0	0	0
1700066M21Rik	2	0	0	0	0	0	0
Gm10186	0	0	3	0	0	0	0
Slc9a1	0	0	2	0	0	0	0
Hnrnpa1l2	1	0	0	0	0	0	0
Pik3r5	0	0	2	0	0	0	0
Mknk2	0	0	5	0	0	0	0
Lair1	0	0	0	0	0	0	6
Gm14165	0	0	5	0	0	0	0
Ttpa	0	0	1	0	0	0	0
Pwwp2b	4	0	9	0	0	0	0
Rasd1	0	0	0	0	3	0	0
Oat	0	0	28	0	0	0	0
Dlx1	1	0	4	0	0	0	0
Zfp600	0	0	1	0	0	0	0
Rwdd4a	0	0	2	0	0	0	2
Zscan20	0	0	5	0	0	0	0
Gm16196	0	0	2	0	0	0	0
Ptgr2	20	0	3	0	0	0	0
Adipor2	0	0	6	0	0	0	0
Rnf212	0	0	1	0	0	0	0
Tmem216	0	0	7	0	0	0	0
Lrrc4b	0	0	2	0	0	0	0
Zfp583	0	0	1	0	0	0	0
Denr	0	0	11	0	0	0	0
Snx27	0	0	0	0	5	0	15
Tmem222	0	0	1	0	1	0	0
Grip2	0	0	9	0	0	0	0
Ptma	0	0	6	0	0	0	0
Zfp869	0	0	7	0	0	0	0
Wdr4	0	0	0	0	3	0	0
Srm	0	2	3	0	0	0	0
Gm9988	0	0	0	0	0	0	6
Gm16008	0	0	5	0	0	0	0
Mdm2	0	0	1	0	0	0	2
Gm5535	0	0	1	0	0	0	0
Pygl	0	0	2	0	0	0	0
Gm9905	0	0	0	0	0	0	5
Cyp4a12b	0	0	3	0	0	0	0
St3gal2	0	0	1	0	0	0	0
Gm13186	0	0	1	0	0	0	0
5730420D15Rik	0	0	0	0	6	0	0
Gm10030	0	0	1	0	0	0	0
Klhdc3	0	0	15	0	0	0	0
Ptpra	0	0	8	0	2	0	3
4930512M02Rik	0	0	2	0	0	0	0
Lrrc55	0	0	0	0	1	0	0
Sulf1	0	0	9	0	0	0	0
Lrrn2	0	0	0	0	6	0	0
Npc2	0	0	5	0	0	0	0
Golgb1	0	0	0	0	0	0	4
Angptl7	0	0	2	0	0	0	0
Nos2	0	0	12	0	1	0	0
Gm10076	0	0	7	0	0	0	0
Efnb1	0	0	0	0	0	0	1
Tdrd12	0	0	1	0	0	0	0
Nrp2	0	0	1	0	0	0	0
Rabgef1	0	0	1	0	0	0	0
Abr	0	0	2	0	0	0	3
Sfxn5	0	0	10	0	0	0	0
Fam63b	0	0	1	0	0	0	0
Kcnb2	0	0	1	0	0	0	0
Jmjd5	0	0	1	0	0	0	0
Rtn3	0	0	21	0	0	0	0
Narfl	0	0	0	0	6	0	0
Gm5578	0	0	2	0	0	0	0
Tuba1b	0	0	0	0	3	0	0
Nlrc3	0	0	1	0	0	0	0
Mfsd6l	0	0	1	0	0	0	0
Cyth4	0	0	0	0	0	0	3
Gpr35	0	0	1	0	1	0	0
Rcor2	0	0	11	0	0	0	0
Socs2	0	0	0	0	46	0	3
Btbd16	0	0	2	0	0	0	6
Gnb2	0	0	1	0	0	0	0
Tmem211	0	0	2	0	0	0	0
2810002N01Rik	0	0	2	0	2	0	0
Sec31b	3	0	1	0	0	0	0
Zfp566	0	0	2	0	0	0	0
A730011L01Rik	0	0	3	0	0	0	0
Lag3	0	0	1	0	0	0	0
Rpl30	0	0	0	0	1	0	0
Tubb2b	0	0	10	0	0	0	0
Gm9964	0	0	24	0	0	0	0
Tmprss13	0	0	9	0	0	0	0
Car14	0	0	0	0	0	0	6
Gm15727	0	0	1	0	0	0	0
Vmn1r83	0	0	1	0	0	0	0
Zfp808	0	0	2	0	0	0	0
Mettl8	5	0	12	0	0	0	0
Ndrg1	0	0	22	0	3	0	0
Gria2	0	0	2	0	0	0	0
Zfp110	0	0	1	0	0	0	0
Pcp2	0	0	6	0	0	0	0
Gm15478	0	0	2	0	0	0	0
Hrh1	0	0	3	0	0	0	0
Gm6428	0	0	0	0	12	0	0
C030034I22Rik	0	0	1	0	0	0	0
CT009512.1	0	0	0	0	5	0	0
Socs5	0	0	15	0	0	0	0
Pcp4l1	0	0	34	0	0	0	0
Gm9703	0	0	6	0	0	0	0
1700027D21Rik	0	0	1	0	0	0	0
Stc2	0	0	3	0	0	0	0
Usp7	0	0	13	0	0	0	0
Bmpr1a	0	0	1	0	0	0	0
Phf5a	0	0	3	0	0	0	0
Gm12346	0	0	1	0	0	0	0
Tbc1d10c	0	0	0	0	13	0	0
Nr2f6	0	0	3	0	0	0	0
Acsm4	0	0	1	0	0	0	0
Slc16a4	0	0	20	0	0	0	0
Srpk2	0	0	12	0	0	0	0
4930471M23Rik	0	0	3	0	0	0	0
Zfp777	0	0	24	0	0	0	0
Gm15824	0	0	4	0	0	0	0
Pvrl1	0	0	4	0	0	0	0
Cpxm1	0	0	6	0	0	0	0
Gbp4	0	0	15	0	0	0	0
Sirt5	0	0	3	0	0	0	0
Adprh	0	0	3	0	0	0	0
Macf1	0	0	1	0	0	0	0
Ehmt1	0	0	1	0	0	0	0
Gm15809	0	0	1	0	0	0	0
Gtf2h1	0	0	0	0	0	0	2
Gm13607	0	0	1	0	0	0	0
Dusp15	0	0	3	0	0	0	0
Glyctk	0	0	0	0	9	0	0
Gm13136	0	0	25	0	0	0	0
Klf7	0	0	10	0	0	0	0
Slc20a1	0	0	0	0	0	0	7
Gm16619	0	0	1	0	0	0	0
Rad1	0	0	3	0	0	0	0
Gm13139	0	0	5	0	0	0	0
Map3k5	0	0	1	0	0	0	0
Abcb11	0	0	0	0	0	0	7
Thap11	0	0	11	0	1	0	0
9530003J23Rik	0	0	4	0	0	0	5
Ifi30	0	0	2	0	0	0	0
Irf6	2	0	0	0	0	0	0
Pmpca	0	0	2	0	0	0	0
Cyp2s1	0	0	3	0	0	0	0
9930005F22Rik	0	0	4	0	0	0	0
Aurkaip1	0	0	7	0	0	0	0
Gm17117	0	0	2	0	0	0	0
Ccdc55	0	0	4	0	0	0	1
Gm14209	0	0	2	0	0	0	0
Snn	0	0	7	0	0	0	0
Ces3b	0	0	0	0	1	0	0
Tmem175	0	0	6	0	0	0	0
2310061C15Rik	0	0	8	0	0	0	0
Lect1	0	0	2	0	0	0	0
Smad3	0	0	52	0	9	0	0
Fam118a	0	0	6	0	0	0	0
Vmn1r40	0	0	0	0	2	0	0
Ttll9	0	0	2	0	0	0	0
Flrt1	0	0	4	0	0	0	0
Dhx35	0	0	5	0	0	0	0
Ttc22	0	0	2	0	0	0	0
Gm9104	0	0	0	0	1	0	0
Comp	0	0	8	0	0	0	0
Mobp	0	0	1	0	0	0	0
Ttk	0	0	4	0	0	0	0
Gm13357	0	0	2	0	0	0	0
Sox8	0	0	0	0	5	0	0
A130022J15Rik	0	0	10	0	0	0	0
Usp46	0	0	0	0	2	0	0
Mavs	0	0	0	0	2	0	3
Gm12408	0	0	2	0	0	0	0
Snca	0	0	6	0	0	0	0
Wtap	0	0	12	0	0	0	0
Fzd2	0	0	1	0	0	0	0
Atp2a1	0	0	3	0	0	0	0
Tcf7l1	0	0	1	0	0	0	0
Clstn1	0	0	5	0	0	0	0
Vps25	0	0	0	0	0	0	1
Vasn	0	0	1	0	0	0	0
Spo11	0	0	12	0	0	0	9
Prmt5	0	0	0	0	5	0	0
7SK	3	0	38	0	0	0	1
Gm973	0	0	0	0	1	0	0
Syn3	0	0	1	0	0	0	0
BC017647	0	0	2	0	3	0	0
Tmem92	0	0	1	0	0	0	0
Crat	0	0	3	0	2	0	0
Fetub	0	0	1	0	0	0	0
Txnl4a	0	0	3	0	0	0	0
Tor1b	0	0	3	0	2	0	0
Kif12	0	0	3	0	0	0	0
Pspn	0	0	1	0	0	0	0
Gm15461	0	0	1	0	0	0	0
Gm17555	0	0	1	0	0	0	0
Drosha	0	0	3	0	0	0	0
BC049352	0	0	3	0	0	0	0
Cuedc1	0	0	1	0	0	0	0
Mlycd	0	0	5	0	0	0	0
Ccl4	0	0	0	0	0	0	6
Gm13066	0	0	1	0	0	0	0
Zfp280c	1	0	0	0	0	0	0
Gm12406	0	0	0	0	2	0	1
Sfmbt1	0	0	4	0	0	0	0
Snrpb	0	0	5	0	0	0	0
Dcdc2a	0	0	2	0	0	0	0
Uchl1	0	0	16	0	0	0	0
Zfp395	0	0	0	0	25	1	2
Gm17019	0	0	1	0	0	0	0
Lemd1	0	0	0	0	1	0	0
Bclaf1	0	0	1	0	0	0	0
Rps11	0	0	0	0	2	0	0
1700020I14Rik	0	0	0	0	2	0	0
Metrn	0	0	0	0	7	0	0
Mrpl51	0	0	5	0	8	0	0
Bmp8a	0	0	1	0	0	0	0
Gm20390	0	0	1	0	0	0	0
Dysf	0	0	2	0	0	0	0
Prkca	0	0	2	0	0	0	0
Slc1a6	0	0	1	0	0	0	0
Haghl	0	0	0	0	6	0	0
Clcnkb	0	0	3	0	4	0	0
Ddb1	0	0	8	0	0	0	0
Calm2	0	0	21	0	0	0	0
Tnpo2	0	0	0	0	1	0	0
Ankrd54	0	0	8	0	0	0	0
Ap1g1	0	0	1	0	0	0	0
Dus3l	0	0	6	0	0	0	0
Padi2	0	0	1	0	0	0	0
Cox6a1	0	0	14	0	0	0	0
Gm10941	0	0	0	0	1	0	0
4932443I19Rik	0	0	0	0	0	0	1
Tarbp2	0	0	1	0	0	0	0
Amacr	1	0	3	0	0	0	0
Dak	0	0	7	0	0	0	0
Gm14472	0	0	7	0	0	0	0
Lta4h	0	0	14	0	0	0	0
Ube2z	0	0	3	0	0	0	0
Ext2	0	0	10	0	0	0	0
Ttc36	0	0	7	0	0	0	0
C1galt1	0	0	3	0	0	0	0
Whrn	0	0	3	0	0	0	0
Notch2	0	0	22	0	0	0	0
Snrpc	0	0	12	0	0	0	0
Ppcdc	0	0	1	0	0	0	0
Dopey1	0	0	2	0	0	0	0
Fam132a	0	0	5	0	0	0	0
Zfp46	0	0	8	0	0	0	0
Gpatch1	0	0	2	0	0	0	0
Gm6723	0	0	0	0	0	0	3
Cct7	0	0	10	0	0	0	0
Tfap2b	0	0	1	0	0	0	0
Ace	0	0	1	0	0	0	0
Atp5o	0	0	1	0	0	0	0
Kcp	0	0	5	0	0	0	0
Gm15899	0	0	7	0	0	0	0
Dctn2	0	0	6	0	0	0	0
Lpar5	0	0	2	0	4	0	0
Gm7168	0	0	2	0	0	0	0
Ccdc159	0	0	0	0	10	3	0
Acpl2	0	0	1	0	0	0	0
Lgi1	0	0	1	0	0	0	0
Eno2	0	0	1	0	0	0	0
Tulp3	0	0	4	0	0	0	0
Dok5	0	0	2	0	0	0	0
Snora7a	0	0	6	0	0	0	0
Gm7334	1	0	0	0	0	0	0
Gip	0	0	3	0	0	0	0
Ppie	9	0	2	0	0	0	0
BC013529	0	0	0	0	7	0	0
Pla2g12a	0	0	21	0	0	0	0
Gm6872	0	0	1	0	0	0	0
Pex5	0	0	10	0	0	0	0
Pkd2	0	0	3	0	0	0	0
Drg1	0	0	144	0	0	0	0
Scamp1	0	0	2	0	0	0	0
Phf3	0	0	3	0	0	0	0
1810043G02Rik	0	0	3	0	0	0	0
Svs1	2	0	2	0	0	0	0
Gbp6	0	0	11	0	0	0	0
Dtwd2	0	0	1	0	0	0	0
Mrpl41	0	0	1	0	0	0	0
Gm9918	0	0	4	0	0	0	0
Smad6	0	0	32	0	13	0	0
Sox10	0	0	8	0	0	0	0
Dstn	0	0	3	0	0	0	0
Gm16031	0	0	6	0	0	0	0
Pank3	0	0	10	0	0	0	0
AC144543.1	0	0	1	0	0	0	0
Amt	0	0	1	0	0	0	0
Kcna4	0	0	5	0	0	0	0
Atl3	0	0	20	0	0	0	0
Naaa	0	0	0	0	13	0	0
Eftud1	0	0	2	0	0	0	0
Nrarp	0	0	1	0	0	0	0
Rpl31	0	0	5	0	4	0	0
Clec1a	0	0	0	0	0	0	1
Ece1	0	0	12	0	0	0	0
Stxbp2	0	0	7	0	0	0	0
Naa16	0	0	2	0	0	0	0
Gm10425	0	0	0	0	1	0	0
Syt6	0	0	1	0	0	0	0
Lmln	0	0	3	0	0	0	0
Slc22a17	0	0	0	0	5	0	0
Nploc4	0	0	1	0	1	0	0
Trbv23	0	0	2	0	0	0	0
4930471M09Rik	0	0	2	0	0	0	0
Gm15577	0	0	1	0	0	0	0
Plac9	0	0	8	0	0	0	0
Gm16437	0	0	7	0	0	0	0
Fam54a	0	0	1	0	0	0	0
Serpina11	1	0	1	0	0	0	0
Ttn	0	0	4	0	0	0	0
Spcs1	0	0	4	0	0	0	0
Gm13248	0	0	3	0	0	0	0
Mtss1l	0	0	1	0	0	0	0
Odf2	0	0	4	0	0	0	0
Adrbk2	0	0	6	0	0	0	0
Crispld2	0	0	4	0	0	0	0
Gm6517	0	0	18	0	0	0	0
CT010508.1	0	0	1	0	0	0	0
Slc26a2	0	0	3	0	0	0	13
Haus1	2	0	0	0	0	0	0
Tdrkh	0	0	0	0	1	0	1
Aes	0	0	17	0	0	0	29
BC030499	0	0	1	0	3	0	0
Tusc5	0	0	0	0	0	0	3
Poldip2	0	0	1	0	2	0	0
Gm13034	0	0	2	0	0	0	0
Tbc1d2	0	0	4	0	0	0	0
Dctn3	0	0	0	0	27	0	14
Dnm1	0	0	5	0	1	0	0
Gm11434	0	0	0	0	0	0	1
Trim54	0	0	5	0	0	0	0
Gm15966	0	0	1	0	0	0	0
Rftn2	0	0	7	0	2	0	0
B3galtl	0	0	1	0	0	0	0
4933427G17Rik	0	0	0	0	0	0	5
Gm15264	0	0	0	0	2	0	6
Lrpprc	0	0	1	0	0	0	0
Mipol1	0	0	1	0	0	0	0
Lhx6	0	0	0	0	1	0	0
Klhdc10	0	0	0	0	4	0	0
Gm11194	0	0	0	0	1	0	0
Syt9	0	0	2	0	0	0	0
Ppp1r14a	0	0	3	0	0	0	0
Dram1	2	0	0	0	0	0	0
Tead2	0	0	2	0	1	0	0
Cyp2e1	0	0	0	0	0	0	1
Snord68	0	0	2	0	0	0	0
C330006A16Rik	0	0	1	0	0	0	0
Gm10766	0	0	2	0	0	0	0
Hsf2	0	0	0	0	0	0	2
AL596108.1	0	0	1	0	0	0	0
Tril	0	0	1	0	0	0	0
Auh	0	0	7	0	0	0	0
Wsb1	0	0	56	0	0	0	0
Cpa1	0	0	0	0	2	0	0
Rpn1	0	0	7	0	0	0	0
Rnf6	0	0	1	0	0	0	0
Tmod1	0	0	5	0	0	0	0
Dcbld1	0	0	2	0	0	0	0
Ms4a4b	0	0	0	0	0	0	6
Cct6a	0	0	1	0	0	0	0
Ap3m2	0	0	12	0	0	0	0
Rbp7	0	0	3	0	0	0	0
Ndufa6	0	0	4	0	0	0	0
Cdk17	0	0	15	0	0	0	0
Cdr2	0	0	0	0	0	0	13
Nmnat3	0	0	0	0	8	0	0
Gm13202	0	0	3	0	0	0	0
Tesk1	0	0	1	0	0	0	0
Lrrc3	0	0	3	0	3	0	0
[truncated: 7,225 more rows]

## Sheet: 7g_TBT
Supplemental Table 7g: Enhancer peaks linked to DEGs for 'TBT over Veh' comparison (Figure 5)
Number of peaks in enhancers (for each histone mark) linked to DEGs (Enhancer Atlas, merged anchors)
Genes	Peak count for H3K27ac up peaks	Peak count for H3K4me1 up peaks	Peak count for H3K4me3 up peaks	M_liver_5mo_TBT.over.VEH	Peak count for H3K27ac down peaks	Peak count for H3K4me1 down peaks	Peak count for H3K4me3 down peaks
Vil1	0	0	1	6.16077	0	0	0
Cdhr2	0	0	0	5.2656	3	0	0
Slc5a1	0	0	4	4.62755	0	0	0
Tm4sf20	0	0	0	4.39445	7	0	0
Myo7b	0	0	0	4.34668	0	0	0
Myo15b	0	0	0	4.05615	1	0	0
Ace2	0	0	0	4.00755	0	0	0
Hkdc1	1	0	0	3.92423	1	0	0
Clec2h	0	0	0	3.76977	0	0	0
Cldn15	0	0	0	3.70065	2	0	0
Pls1	0	0	0	3.67922	8	0	1
Cldn7	0	5	0	3.605	5	0	0
Ada	0	1	0	3.3448	0	0	0
Epcam	1	0	0	3.24227	0	0	0
Tmprss4	0	0	6	3.1708	0	0	0
Krt19	0	0	0	3.16381	0	0	0
Dbp	0	0	1	3.08791	15	20	0
Misp	0	0	0	3.08211	0	0	0
Gpx2	9	0	1	3.04227	23	0	0
Sdcbp2	0	0	0	3.04018	0	0	0
Cftr	0	0	0	3.01887	0	0	0
Igsf9	0	0	0	3.00291	0	0	0
Smpdl3b	0	0	0	2.93708	21	0	0
H2-Q2	0	0	0	2.91677	0	0	0
Sgpp2	0	0	0	2.84428	7	0	0
Rab25	0	0	1	2.84293	0	0	0
Spink1	0	0	0	2.8183	0	0	0
Per3	0	0	0	2.79214	0	0	0
Degs2	15	0	5	2.75165	33	0	0
Gipc2	2	0	0	2.69942	0	0	0
Gsta1	0	0	0	2.6772	0	0	0
Spint1	0	0	0	2.67124	2	0	0
Ugt1a7c	0	0	0	2.66623	0	0	2
Cyp7a1	0	0	0	2.51918	0	0	0
Jchain	0	0	0	2.47588	0	0	0
Calml4	0	0	6	2.36574	16	0	0
Lgals4	21	0	0	2.34413	9	0	0
Akr1b7	0	0	0	2.33272	0	0	0
Slc26a6	0	0	0	2.31807	0	0	0
Plekhh1	0	0	0	2.31502	0	0	0
St14	1	0	1	2.27743	0	0	0
Prr15l	0	11	11	2.26188	3	0	0
F2rl1	0	0	16	2.14211	0	0	0
Bhlhe41	0	0	0	2.12104	20	0	0
Tmc4	0	0	0	2.11785	0	0	0
Serpinb1a	0	0	0	2.11379	15	0	0
Acot3	0	0	0	2.0976	25	0	0
Dclk1	0	0	3	2.07587	0	0	0
Mgat4a	22	0	0	2.0588	0	0	0
Coro2a	0	0	0	2.05118	15	0	0
Usp2	0	0	0	2.03725	0	0	0
Ap1m2	0	0	0	2.02516	2	0	0
Ihh	0	0	0	2.01272	0	0	0
Ace	0	0	0	2.00896	17	0	0
Heph	0	0	0	2.00735	0	0	0
Slc28a2	0	0	0	1.97198	11	0	0
Fam83b	0	0	0	1.96916	0	0	0
Exoc3l4	0	0	0	1.94086	0	0	0
Tspan8	0	0	0	1.92671	0	0	0
Cldn4	0	0	0	1.86278	4	0	0
Wee1	0	0	17	1.8184	0	0	0
Itgb4	0	0	0	1.81288	1	0	0
Prdm16	0	0	0	1.76744	1	0	0
Myo5c	0	0	0	1.74756	12	0	0
Fermt1	0	0	0	1.7268	0	0	0
Plac8	0	0	0	1.69047	0	0	0
Cx3cl1	16	0	2	1.65174	0	0	0
Pycard	0	0	0	1.64476	6	0	0
Pcsk4	0	0	0	1.64304	4	0	0
Slc12a8	0	0	0	1.61752	0	0	0
Nrep	0	0	0	1.61571	0	0	0
Igsf23	0	0	0	1.60915	0	0	0
Sema3b	0	0	4	1.60674	24	0	0
Crip1	0	0	7	1.59319	2	0	0
Erbb2	0	0	4	1.58534	6	0	0
Upp2	0	0	0	1.57892	0	0	0
1810046K07Rik	0	0	0	1.576	2	0	0
Prr11	0	0	0	1.57222	0	0	0
Clic5	0	0	0	1.57203	0	0	0
Cyp26a1	1	0	0	1.56798	0	0	0
Gm3776	0	0	0	1.55942	0	0	0
Usp43	0	0	0	1.54343	0	0	0
Elovl7	0	0	0	1.52679	2	0	0
Fhl2	0	0	0	1.51967	0	0	0
Tef	0	0	0	1.47944	7	0	0
Elf3	0	0	6	1.4791	1	0	0
Clec9a	0	0	0	1.45589	0	0	0
Synpo2	0	0	0	1.44958	0	0	0
Pkp3	0	0	11	1.41978	0	0	0
Afp	0	0	0	1.41493	0	0	0
Acss1	0	0	0	1.39569	0	0	0
Dpep1	0	0	4	1.39268	0	0	0
Dclk3	0	0	0	1.39055	0	0	0
Gucy2c	0	0	0	1.39005	0	0	0
Slc39a5	0	0	0	1.37754	0	0	0
Ciart	0	0	0	1.36971	0	0	0
Itpr3	0	0	0	1.3573	4	0	0
Slc2a5	0	0	0	1.35564	0	0	0
Ttn	0	0	0	1.35173	0	0	0
Lrrc1	0	0	0	1.34675	3	0	0
Nlrc4	0	0	0	1.34228	15	0	0
Vwa1	0	0	3	1.34195	0	0	0
Trpm4	0	0	1	1.33713	9	3	0
Abcb1a	3	0	0	1.31759	0	0	0
Galnt6	0	0	0	1.30419	27	0	0
Klf4	0	0	0	1.29343	0	0	0
Rflnb	0	0	0	1.28778	0	0	0
Ehf	0	0	0	1.28733	1	0	0
Arhgef16	0	0	0	1.28629	6	0	0
Dsg1c	0	1	0	1.27428	0	0	0
Treh	0	0	1	1.26715	0	0	0
Lrrc8b	0	0	0	1.26671	0	0	0
Per2	0	0	0	1.26446	5	0	0
Hsd17b6	0	0	0	1.26423	0	0	0
Ezr	0	0	0	1.26004	0	0	0
Uhrf1	0	0	0	1.25903	16	0	0
Naip1	2	0	0	1.25664	0	0	0
Casz1	1	0	0	1.25635	23	0	0
Cyp2a5	0	0	1	1.24635	0	0	0
Ckb	0	2	10	1.24589	1	0	0
Fam13a	0	0	0	1.22953	0	0	0
Adamts7	0	0	1	1.20884	0	0	0
5330417C22Rik	0	0	0	1.20447	1	0	0
Ppp1r3g	0	0	0	1.19857	6	0	0
Chp2	0	0	0	1.19512	0	0	0
Osbpl3	36	0	0	1.1935	0	0	0
Ccl25	0	0	0	1.19312	0	0	0
Kcnq1	4	0	3	1.18999	2	0	0
Tnfrsf19	0	0	0	1.18679	9	0	0
Chmp4c	0	0	0	1.18369	1	0	0
Gdpd1	0	0	0	1.18326	0	0	0
Mical1	0	0	0	1.18171	0	0	0
Tspan3	0	0	0	1.18075	0	0	0
Pnldc1	0	0	0	1.17716	2	0	0
Dok4	18	0	2	1.16594	0	0	0
Ugt1a6a	0	0	0	1.16067	0	0	2
Adap1	2	0	1	1.15136	0	0	0
Igdcc4	0	0	0	1.1384	0	0	0
Sult1c2	0	0	0	1.11867	0	0	0
Lrtm1	0	0	0	1.11421	0	0	0
S100a8	4	0	0	1.10972	4	0	0
Itga6	1	0	0	1.10079	2	0	0
Hpgd	0	0	0	1.09953	0	0	0
Mxd1	10	0	0	1.0917	2	0	0
Slc4a7	0	0	0	1.08739	23	0	0
Ptgr1	0	0	0	1.08224	73	0	0
Pkm	0	0	0	1.07825	0	0	0
Bmf	0	0	0	1.07338	1	0	0
Ngef	0	0	0	1.07026	0	0	0
Hbb-bt	0	0	0	1.06349	0	0	0
Erbb4	0	0	0	1.06228	0	0	0
Slco1a4	0	0	0	1.05115	0	0	0
Slc25a24	0	0	0	1.02694	15	0	0
Prom1	0	0	0	1.01896	0	0	0
Fbln1	0	1	0	1.01811	4	0	0
Grem2	0	0	0	1.00947	0	0	0
Cd24a	0	0	0	1.00039	1	0	0
Tk1	0	0	0	0.985478	18	0	0
Oxct1	0	0	0	0.985031	1	0	0
Slc37a2	5	0	5	0.968498	8	0	0
Me2	0	0	0	0.948998	12	0	0
Aldh18a1	0	0	0	0.942363	0	0	0
Hsd3b2	0	0	0	0.939594	0	0	0
Pfkp	0	0	0	0.931218	0	0	9
Emp1	0	0	0	0.925779	0	0	0
Tspan15	0	0	0	0.923128	5	0	0
Abcd2	0	0	0	0.917326	4	0	0
Mme	0	0	0	0.899175	0	0	4
Mki67	0	0	0	0.892198	13	0	0
Slc5a6	0	0	0	0.890063	27	0	0
Pparg	0	0	0	0.887123	0	0	0
Gm14403	0	0	0	0.885728	0	0	0
Neurl3	0	0	0	0.884022	1	0	0
Slc6a8	0	0	0	0.878933	5	0	0
Nr1i3	0	0	14	0.866812	0	0	0
Akr1c19	4	0	0	0.851419	0	0	0
Top2a	0	0	1	0.846995	30	0	0
Ank3	0	0	0	0.845672	0	0	0
Fam129b	0	0	0	0.844653	1	0	0
Gda	0	0	0	0.839977	0	0	0
Zfp970	0	0	0	0.839381	0	0	0
Per1	13	2	0	0.832039	0	0	0
Tnfsf10	0	0	0	0.826838	0	0	0
Nr1d2	0	0	0	0.818208	14	0	0
Golm1	0	0	0	0.814203	1	0	0
Atp1b1	0	0	0	0.797945	0	0	0
Shank2	0	0	0	0.794612	0	0	0
Maoa	0	0	0	0.789765	0	0	0
Mgst3	0	0	0	0.77687	37	0	0
Rnf43	0	0	0	0.773519	0	0	0
Fnip2	1	0	0	0.772222	0	0	0
Col27a1	8	0	0	0.770975	11	0	4
Slc16a12	0	0	0	0.76949	0	0	0
Ptgfrn	0	0	0	0.768367	0	0	0
Uap1l1	0	0	8	0.759442	1	0	0
Smpd3	1	0	0	0.749844	3	0	0
Gys2	0	0	0	0.747656	2	0	0
Slc2a2	0	0	0	0.745904	0	0	0
Limd2	0	0	0	0.734898	14	0	0
Slc46a3	0	0	0	0.722538	2	0	0
Gm10801	0	0	0	0.719457	0	0	0
Gnpda1	3	0	5	0.717272	0	0	0
Gstt2	0	0	0	0.717	0	0	0
Myo1d	0	0	0	0.716308	0	0	0
Nr3c2	0	0	0	0.710993	0	0	0
Acss3	0	0	0	0.69326	0	0	0
Taf1d	0	0	0	0.693245	1	0	0
H2-Ab1	0	0	0	0.687972	0	0	0
Cyp2c38	0	0	0	0.684817	0	0	0
Pde4b	0	0	0	0.676653	0	0	0
Cfap20	0	0	0	0.676352	0	0	0
Fmo2	14	0	0	0.672047	0	0	0
Coq10b	0	0	0	0.662863	4	0	0
Ifi27l2b	0	0	0	0.660319	0	0	0
Ppat	0	0	3	0.660279	7	0	0
Sucnr1	0	0	0	0.660131	0	0	0
Pex26	0	0	0	0.652757	0	0	0
Arhgap18	0	0	0	0.648676	1	0	0
Jade1	0	0	0	0.645452	0	0	0
B4galt5	2	0	0	0.637175	5	0	0
Myh14	0	0	0	0.635747	25	0	0
Mmp15	0	0	4	0.633038	0	0	0
Arsa	0	0	0	0.630157	47	0	0
H2-Aa	0	0	0	0.625136	0	0	0
Rps6ka1	1	0	18	0.620623	46	0	0
Nampt	9	0	0	0.62044	0	0	0
Apol7a	0	0	0	0.617544	9	0	0
Mpp1	0	0	0	0.613846	4	0	0
H2-Eb1	0	0	0	0.605783	0	0	0
Fgfrl1	0	0	0	0.602247	9	0	0
Hjurp	3	0	0	0.600745	0	0	2
Ogt	0	0	0	0.600036	0	0	0
Itga8	0	0	0	0.594629	0	0	0
Rbm47	1	0	0	0.592366	0	0	0
Nfx1	6	0	0	0	0	0	0
Gm15226	1	0	0	0	0	0	0
Sel1l3	0	0	0	0	11	0	0
Zfyve27	0	0	0	0	4	0	0
Cd200	0	1	0	0	0	0	0
Lmf2	0	0	0	0	46	0	0
Tox2	0	3	0	0	0	0	0
Gm14226	0	0	0	0	4	0	0
Clic4	4	0	3	0	0	0	0
Igkc	0	0	1	0	0	0	0
Crabp2	0	0	6	0	0	0	0
2310014L17Rik	0	0	2	0	17	0	0
Zfp689	0	0	0	0	7	0	0
AC159324.1	0	0	0	0	1	0	0
Trim69	0	0	0	0	3	0	0
Gm12602	0	0	0	0	1	0	0
Wdr93	0	0	7	0	0	0	0
Olfr1443	0	0	0	0	2	0	0
Pigc	0	0	0	0	1	0	0
4930412O13Rik	0	0	5	0	0	0	0
F11r	2	5	5	0	0	0	0
A330017A19Rik	0	0	0	0	5	0	0
Trub1	0	0	0	0	10	0	0
Cd209a	0	0	0	0	3	0	0
Il11ra1	0	0	0	0	24	0	0
Gm6097	0	0	0	0	3	0	0
Fat3	0	0	1	0	0	0	0
Gm2709	0	0	1	0	0	0	0
Mgst2	0	0	0	0	9	0	0
Fut8	0	0	0	0	25	0	0
D430018E03Rik	0	0	0	0	1	0	0
Mpzl3	0	0	4	0	0	0	0
Fam177a	0	0	0	0	9	0	0
Gm9745	0	0	0	0	1	0	0
Gm13870	0	0	0	0	1	0	0
Diras1	0	0	0	0	2	0	0
Gm8473	0	0	0	0	1	0	0
Gm17080	0	0	1	0	0	0	0
Rfxap	0	0	4	0	28	0	0
Ints7	0	0	0	0	50	0	0
Gm4879	0	0	1	0	9	0	0
Eea1	0	0	0	0	37	0	0
Gm13362	0	0	0	0	1	0	0
Gm6378	1	0	0	0	5	0	0
Gtf3c3	0	0	0	0	3	0	0
Cyp2d37	0	0	0	0	3	0	0
Smtn	5	0	0	0	2	0	0
1700060J05Rik	0	0	0	0	4	0	0
2900072N19Rik	0	0	0	0	5	0	0
Dact2	0	0	0	0	1	0	0
Osbpl10	0	0	0	0	10	0	0
Magix	0	0	0	0	2	0	0
2410017P09Rik	0	0	0	0	7	0	0
Gm12165	0	0	0	0	16	0	1
Fxyd5	0	4	9	0	5	0	0
Asb18	0	0	6	0	0	0	0
2010110K18Rik	0	0	0	0	1	0	0
AC139317.1	0	0	0	0	1	0	0
Rnps1	0	0	0	0	11	0	0
Gm17209	0	0	0	0	6	0	0
Ap2s1	0	0	0	0	39	0	0
Zfp874b	10	0	0	0	0	0	0
Eprs	0	0	0	0	18	0	0
Gm3912	0	0	0	0	1	0	0
March5	0	0	0	0	0	0	2
Gm12204	0	0	0	0	2	0	0
Gm13252	0	0	0	0	2	0	0
Pard6a	3	0	0	0	48	0	0
Gm15440	0	0	0	0	21	0	0
Csdc2	0	0	0	0	12	0	0
Fam192a	18	0	0	0	0	0	0
Qrich2	0	0	8	0	17	0	0
Rxrb	3	0	0	0	9	0	0
Actr1b	0	0	0	0	5	0	0
Gclm	0	0	0	0	48	0	0
Gm16283	1	0	0	0	0	0	0
Madcam1	0	0	0	0	22	0	0
Arhgap31	0	0	0	0	5	0	0
4930528F23Rik	0	0	0	0	1	0	0
Myo5a	0	0	0	0	17	0	0
Dek	0	0	0	0	3	0	0
Bcmo1	3	0	0	0	12	0	0
B330016D10Rik	0	0	17	0	0	0	0
U1	8	0	12	0	94	0	0
Col25a1	0	0	0	0	4	0	0
Plekhg2	22	0	0	0	0	0	0
B230217C12Rik	0	0	21	0	25	0	0
Glcci1	0	0	0	0	14	0	1
Deaf1	0	0	11	0	1	0	0
Gm9703	0	0	4	0	21	0	0
C130036L24Rik	0	0	5	0	0	0	0
Frmd8	0	0	3	0	0	0	0
Gm13547	0	0	0	0	8	0	0
Csta	0	0	0	0	7	0	0
Flt3	0	0	0	0	11	0	0
Ikzf5	0	0	0	0	1	0	0
Usp14	3	0	0	0	0	0	0
Ccdc61	0	0	2	0	9	0	0
Plk1	0	0	0	0	13	0	0
Onecut3	0	0	0	0	1	0	0
Izumo4	0	0	0	0	17	0	0
Ado	0	0	0	0	4	0	0
Gm10364	0	0	0	0	1	0	0
Mettl8	0	0	3	0	5	0	0
Pxt1	0	0	0	0	9	0	0
AI661453	11	0	0	0	0	0	0
1810064F22Rik	0	0	0	0	1	0	0
Phf12	0	0	9	0	19	0	0
Tes	0	0	0	0	2	0	0
AC149067.1	0	0	0	0	3	0	0
D16H22S680E	0	0	0	0	1	0	0
Trim3	0	0	0	0	13	0	0
Gm14238	0	0	0	0	4	0	0
Ahdc1	0	0	0	0	39	0	0
Fkbp6	0	0	0	0	0	0	1
Cd72	0	0	0	0	20	0	0
Gm15444	0	0	3	0	4	0	0
Gm13821	0	0	0	0	1	0	0
Gm16519	2	0	0	0	0	0	0
Gm16299	0	0	0	0	3	0	0
Dact3	0	0	0	0	19	0	0
D930048G16Rik	0	2	0	0	1	0	0
1520401A03Rik	0	4	0	0	0	0	0
2410124H12Rik	0	0	0	0	5	0	0
AC151602.1	0	0	1	0	6	6	0
Sucla2	0	0	0	0	24	0	0
Gm12889	0	0	0	0	4	0	0
Gm8385	0	0	0	0	9	0	0
Rala	0	0	0	0	1	0	0
Zfp94	0	0	0	0	10	0	0
Qpctl	0	0	10	0	7	0	0
Exosc5	0	0	5	0	3	0	0
Gm15569	0	0	0	0	2	0	0
6030429G01Rik	0	0	0	0	14	0	0
Lbr	0	0	0	0	49	0	0
3110082D06Rik	0	0	1	0	0	0	0
4930404N11Rik	0	0	0	0	2	0	0
Gm16101	0	0	0	0	1	0	0
Gm11653	0	0	0	0	6	0	0
AI428936	0	6	1	0	5	0	0
CN725425	0	0	0	0	1	0	0
Zap70	0	0	0	0	1	0	0
Rps11	0	0	2	0	5	3	0
Rnf111	0	0	0	0	47	0	0
Atp6v0d1	0	0	0	0	50	0	0
Gm13648	0	0	2	0	2	0	0
Dleu2	0	0	0	0	7	0	0
Ddi2	0	0	10	0	0	0	0
Tom1l2	2	0	8	0	29	0	0
Arap3	14	0	19	0	0	0	0
Tex264	0	0	2	0	0	0	0
Mark2	0	0	2	0	11	0	0
Rrbp1	0	0	0	0	2	0	0
Lrwd1	0	0	0	0	2	0	0
Tnfrsf8	0	0	0	0	0	0	2
Gm7850	0	0	0	0	1	0	4
Scn3b	5	0	0	0	0	0	0
Gm12097	3	0	0	0	4	0	0
Numb	0	0	0	0	53	0	0
6330408A02Rik	0	0	1	0	7	0	0
Col4a2	7	0	0	0	7	0	0
Wdpcp	0	0	0	0	13	0	0
Gm12712	8	0	0	0	0	0	0
6330403L08Rik	2	0	0	0	0	0	0
Ebpl	0	0	0	0	35	0	0
Gm11754	0	0	0	0	3	0	0
Sox8	0	0	1	0	3	0	0
Vill	10	0	0	0	5	0	0
Fosl1	0	0	3	0	0	0	0
Gm10345	0	0	3	0	1	0	0
4930535C22Rik	0	1	0	0	0	0	0
D430041D05Rik	0	0	1	0	3	0	0
Gm11832	0	0	0	0	4	0	0
Ppid	3	0	0	0	0	0	0
Slc25a16	29	0	0	0	0	0	0
Qser1	0	0	0	0	2	0	0
Dbt	0	0	0	0	37	0	0
Cycs	34	0	0	0	0	0	0
Fstl3	0	0	0	0	37	0	0
Tmed4	6	0	0	0	0	0	0
Fam183b	0	0	0	0	6	0	0
Pi4k2a	0	0	0	0	5	0	0
Zfp410	0	0	0	0	97	0	0
Ttc38	0	0	0	0	30	0	0
1700015E13Rik	0	0	0	0	7	0	0
Gm12198	0	0	0	0	1	0	0
Erlec1	0	0	0	0	6	0	0
Gm9933	0	0	0	0	1	0	0
Tmem50a	12	0	3	0	0	0	0
Catsper4	0	0	7	0	0	0	0
9230115E21Rik	0	0	0	0	9	0	0
Fam71e2	0	0	0	0	13	0	0
Mfsd7a	0	0	0	0	1	0	0
Zscan18	0	0	2	0	9	0	0
Hectd1	9	0	0	0	0	0	0
Pdxp	3	0	3	0	13	0	0
E130114P18Rik	0	0	0	0	15	0	0
Gm11572	0	4	4	0	8	0	0
Hsf1	0	0	8	0	0	0	0
Itpa	0	0	6	0	34	0	0
A430107O13Rik	0	0	0	0	1	0	0
Aph1c	5	0	0	0	0	0	0
Mcm4	0	0	0	0	32	0	0
Hif3a	0	0	0	0	4	0	0
Zfp14	0	1	0	0	3	0	0
Gm16863	0	0	1	0	0	0	0
Rasl10b	0	0	0	0	1	0	0
Gm11646	0	0	0	0	3	0	0
Bmp8a	0	0	3	0	0	0	0
Syt5	0	0	0	0	14	0	0
Tnfsf9	0	0	0	0	8	0	0
Gm13685	0	0	0	0	4	0	0
Galnt12	1	0	0	0	2	0	0
Gm13061	0	0	3	0	1	0	0
Gm14304	0	0	0	0	1	0	0
Paqr3	0	0	0	0	1	0	0
Dgkq	0	0	0	0	3	0	0
Pgap3	0	0	3	0	5	0	0
Ctdsp1	0	0	1	0	0	0	0
Eid2b	4	0	0	0	0	0	0
Gm12201	0	0	0	0	1	0	0
Akap10	0	0	0	0	12	0	0
Nup62cl	0	0	0	0	2	0	0
Abca8b	0	0	0	0	1	0	0
Tube1	1	0	0	0	0	0	0
Pla2g4c	0	0	0	0	2	0	0
Ebf4	0	0	0	0	7	0	0
Gphn	0	0	0	0	16	0	0
Gm13293	0	2	0	0	0	0	0
Klc3	0	0	15	0	0	0	0
Hnrnph3	23	0	0	0	0	0	0
Ido1	1	0	0	0	0	0	0
Gm13302	0	0	0	0	2	0	0
Cd247	10	0	10	0	21	0	0
Gm12664	0	0	0	0	1	0	0
Gm20546	0	0	0	0	12	0	0
Gm20391	0	0	0	0	8	0	0
Gm5093	0	0	0	0	47	0	0
Fgfr1op2	3	0	0	0	0	0	0
1700123O20Rik	0	0	0	0	1	0	0
Pin1	0	0	0	0	3	0	0
Smt3h2	0	0	0	0	3	0	0
Gm16305	0	0	0	0	9	0	0
Gm12200	0	0	0	0	1	0	0
Edn2	0	0	0	0	3	0	0
Tomt	0	0	2	0	0	0	0
Fam123a	0	0	0	0	1	0	0
Sh3bp5	0	0	7	0	0	0	0
Myo6	0	0	0	0	28	0	0
Dolk	16	0	0	0	23	0	0
Insrr	0	0	2	0	0	0	0
Gm15286	1	0	0	0	6	0	0
Stmn2	0	0	1	0	0	0	0
4930430O22Rik	0	0	0	0	2	0	0
Gpd1l	0	0	0	0	20	0	0
Paip2	0	0	3	0	5	0	0
Gm12307	0	1	0	0	5	0	0
Gm17163	0	0	0	0	1	0	0
Snx8	0	0	0	0	0	0	7
Esr2	0	0	2	0	1	0	0
Gm12258	0	0	0	0	21	0	0
Gm11718	0	0	0	0	0	3	3
Rpl27	0	3	14	0	9	0	0
AC160757.1	1	0	0	0	3	0	0
4930538K18Rik	0	0	0	0	2	0	0
Fcna	0	0	3	0	0	0	0
Lrrc27	32	0	0	0	0	0	0
Gpr20	4	0	0	0	0	0	0
Gm12677	0	0	0	0	3	0	0
Fcer1g	4	3	32	0	0	0	0
Cyp2s1	0	0	6	0	1	0	0
BC065403	0	0	5	0	1	0	0
Ccno	0	0	0	0	9	0	0
Taf11	1	0	4	0	63	0	0
Adora1	3	0	0	0	0	0	0
Gm12522	0	0	0	0	1	0	0
Rhcg	0	0	6	0	0	0	0
Txndc12	0	0	0	0	2	0	0
Poc1a	0	0	15	0	0	0	0
Gm13785	0	0	0	0	4	0	0
Gm9917	0	0	3	0	8	0	0
Rbm24	0	0	0	0	6	0	0
Scaf8	0	0	0	0	62	0	0
2210016F16Rik	0	0	0	0	93	0	0
Rfxank	3	0	13	0	0	0	0
Slco2a1	0	0	0	0	5	0	0
Spopl	0	0	0	0	1	0	0
Cdc42se1	15	0	0	0	0	0	0
Mutyh	0	0	0	0	10	0	0
Gm12968	0	0	0	0	3	0	0
Rsph1	0	0	0	0	15	0	0
Ddx46	0	0	0	0	1	0	0
Gm16581	0	0	0	0	1	0	0
Ccdc67	0	0	0	0	1	0	0
Cyp2d26	0	0	0	0	4	0	0
Prr12	0	0	2	0	5	0	0
Gm17670	5	0	8	0	0	0	0
Mex3a	0	0	3	0	0	0	0
Slc35c1	0	0	0	0	4	0	0
Fastkd5	0	0	6	0	5	0	0
Ndst1	0	0	0	0	10	0	0
4930486F22Rik	0	0	0	0	2	0	0
Cwh43	0	0	0	0	7	0	0
Tab2	0	0	0	0	48	0	0
Gpatch3	0	0	0	0	54	0	0
Serp2	0	0	0	0	17	0	0
Fuz	0	0	2	0	6	0	0
Rasal3	0	0	0	0	1	0	0
Fxr1	0	0	0	0	3	0	0
Hs6st1	1	0	0	0	0	0	0
Gm7241	0	0	0	0	3	0	0
Gm4951	0	0	0	0	1	0	0
Gm13549	0	0	0	0	1	0	0
Gm11764	1	0	0	0	2	0	0
Gapdh	0	0	0	0	10	0	0
Tmem169	29	0	0	0	9	0	0
Gm20528	0	0	0	0	0	0	1
Aldh9a1	0	0	0	0	52	0	0
Sema4d	0	0	0	0	72	0	0
Zfp282	0	0	0	0	66	0	14
Diablo	0	0	0	0	5	0	0
Slc25a40	3	0	0	0	0	0	0
Egfl6	5	0	0	0	0	0	0
Bahd1	0	0	0	0	4	0	0
Morn2	0	0	2	0	21	0	1
Zc3hc1	0	0	0	0	16	0	0
Asb8	1	0	0	0	0	0	0
Gm16259	0	0	0	0	21	0	0
Ctdp1	4	0	7	0	1	0	0
Gm9386	0	0	2	0	0	0	0
4930524L23Rik	0	0	0	0	3	0	0
Mfng	3	0	5	0	10	0	0
Foxm1	6	0	0	0	0	0	0
Hspa2	0	0	13	0	93	0	0
Lingo1	0	0	0	0	6	0	0
Wdr82	0	0	15	0	0	0	0
Gxylt1	0	0	0	0	4	0	0
Gm11592	0	0	0	0	4	0	0
Taf6l	15	0	0	0	0	0	0
Golt1b	0	0	0	0	3	0	0
Trip12	0	0	5	0	0	0	0
snoR38	0	0	0	0	1	0	0
Prss21	0	1	0	0	1	0	0
Gm15742	0	0	0	0	4	0	0
Rab24	0	0	0	0	4	0	0
Gm15454	1	0	0	0	2	0	0
Mat2a	2	0	0	0	37	0	0
Gm9846	0	0	0	0	13	0	0
Tmprss13	0	0	5	0	0	0	0
Gm13937	0	0	0	0	2	0	0
Dnajb2	0	0	4	0	0	0	0
Brp44	0	0	0	0	30	0	0
Prhoxnb	0	0	0	0	1	0	0
Duxbl	3	0	0	0	0	0	0
Adc	3	0	2	0	11	0	0
Nip7	0	0	0	0	130	0	0
Gm6311	0	0	0	0	2	0	0
Hpdl	0	0	0	0	5	0	0
BC018507	1	0	0	0	0	0	0
Serpina12	2	0	0	0	1	0	0
Ears2	0	0	0	0	10	0	0
Olfr267	0	0	0	0	1	0	0
Mier2	0	0	0	0	22	0	0
Nme3	0	0	3	0	0	0	0
Pate2	1	0	0	0	0	0	0
Rpf2	0	0	2	0	0	0	0
Serpina4	1	0	0	0	0	0	0
Gm12802	1	0	0	0	3	0	0
Fam194a	0	0	0	0	1	0	0
A830080D01Rik	0	0	0	0	13	0	0
Aars2	0	0	2	0	1	0	0
Slc25a1	0	0	0	0	21	0	0
SNORA65	0	0	0	0	5	0	0
Farp1	0	0	0	0	39	0	0
Adad2	0	0	0	0	4	0	0
Idh3g	0	0	0	0	3	0	0
Cspg5	0	0	0	0	27	0	0
Smad1	0	0	0	0	24	0	0
AA960436	1	0	4	0	0	0	0
Gm13163	0	0	0	0	1	2	2
0610010O12Rik	16	0	1	0	23	0	0
Gm14029	0	0	1	0	0	0	0
Gm10151	0	0	0	0	4	0	0
SNORD26	1	0	0	0	0	0	0
Gm9833	0	0	0	0	2	0	0
Ffar2	0	0	6	0	0	0	0
Gm7418	13	0	1	0	0	0	0
Gm5459	0	0	4	0	0	0	1
Zfp125	0	0	2	0	0	0	0
1110008L16Rik	0	0	0	0	10	0	0
Dsg3	0	1	0	0	0	0	0
Zfp575	0	0	0	0	6	0	0
2700097O09Rik	0	0	0	0	46	0	0
AC125201.1	0	0	0	0	1	0	0
Fuca1	0	0	0	0	6	0	0
Slc27a6	0	0	0	0	1	0	0
Slc28a3	0	0	0	0	17	0	0
Abhd2	0	1	9	0	0	0	0
Tmem70	0	0	0	0	10	0	0
Ttyh3	0	0	0	0	0	0	1
Smarca4	0	0	0	0	1	0	0
Gm12959	0	0	0	0	3	0	0
Tigit	1	0	0	0	0	0	0
Smug1	0	0	0	0	2	0	0
Dlx1as	1	0	0	0	0	0	0
1700047I17Rik2	0	0	0	0	11	0	0
SNORD19B	0	0	1	0	0	0	2
Gm14224	3	0	0	0	0	0	0
Renbp	0	0	0	0	3	0	0
Chst10	0	0	12	0	2	0	0
Ppp2r1b	0	0	0	0	25	0	0
Ndel1	17	4	0	0	0	0	0
Gng10	0	0	0	0	67	0	0
Mrpl51	0	0	0	0	7	0	0
Exoc3l2	0	0	14	0	0	0	0
U2af1l4	0	2	8	0	2	0	0
Slc6a17	0	0	11	0	0	0	0
Ankrd34a	0	0	1	0	21	0	0
4930471M23Rik	0	0	6	0	15	0	0
Ssbp3	11	0	0	0	20	0	0
Zfp764	0	0	0	0	3	0	0
Gm13222	0	0	0	0	0	0	2
Dlat	0	0	0	0	10	0	0
Gm12592	2	0	0	0	12	12	0
Hspbap1	0	0	0	0	23	0	0
Dos	0	0	0	0	4	0	0
Slc35c2	0	0	0	0	20	0	0
1110008J03Rik	8	0	4	0	0	0	0
Acpl2	0	0	0	0	21	0	0
Gm4841	0	0	0	0	4	0	0
Slc22a6	1	0	0	0	0	0	0
Gys1	0	0	1	0	13	8	0
Mctp1	0	0	0	0	1	0	0
Cldn6	0	4	0	0	0	0	0
Irf3	0	0	1	0	5	0	0
Alg9	0	0	0	0	19	0	0
Lifr	0	0	2	0	0	0	0
Noa1	0	0	1	0	31	0	0
Snord42b	0	0	0	0	2	0	0
Gm15764	0	0	0	0	1	0	0
Plod3	0	0	0	0	2	0	0
Myo18a	0	0	19	0	12	0	0
Gm13687	0	0	0	0	17	0	0
Ruvbl2	0	0	1	0	13	10	0
Uchl5	0	0	0	0	2	0	0
4930426D05Rik	0	0	0	0	1	0	0
Supt5h	26	0	0	0	0	0	0
Dsp	0	0	0	0	11	0	0
Gm11395	0	0	0	0	2	0	0
Tmem30a	0	0	0	0	7	0	0
4833439L19Rik	0	0	1	0	35	0	0
Cckar	0	0	0	0	19	0	0
Prm3	0	0	0	0	8	0	0
Nkpd1	0	0	12	0	0	0	0
6330416G13Rik	5	0	0	0	13	0	5
Bax	0	0	1	0	8	12	0
Cnot7	1	0	0	0	17	0	0
Shroom2	0	0	0	0	2	0	0
Lrch3	0	0	0	0	1	0	0
Cd53	0	0	0	0	2	0	0
Fam100a	0	0	0	0	1	0	0
Adprhl2	0	0	0	0	5	0	0
Ube2j2	0	0	10	0	5	0	0
C2cd2	0	0	0	0	0	0	4
Ldoc1l	6	4	0	0	0	0	0
Ube2l6	1	0	0	0	0	0	0
Col9a2	0	0	0	0	23	0	0
Gm5161	0	0	0	0	9	0	0
Trpc4ap	1	0	0	0	4	0	0
Nme1	0	0	0	0	2	0	0
Hoxc13	0	0	3	0	0	0	0
Znhit6	0	0	0	0	1	0	0
Birc3	0	0	0	0	28	0	0
C2cd4c	0	0	0	0	14	0	0
Lyrm2	0	0	0	0	3	0	0
Ralgps2	0	0	0	0	4	0	0
Ccna1	0	0	6	0	2	0	0
Ccdc57	0	0	0	0	13	0	4
A930018P22Rik	0	0	1	0	0	0	0
Hapln2	0	0	3	0	0	0	0
Gm15187	0	0	0	0	2	0	0
Stmn1	8	0	9	0	0	0	0
Cthrc1	0	0	0	0	4	0	0
Cc2d2a	0	0	0	0	1	0	0
Map6d1	0	0	4	0	23	0	0
Ddx54	10	0	4	0	1	0	0
Stx12	0	0	0	0	37	0	0
1110002L01Rik	0	0	0	0	3	0	0
Ing4	0	0	0	0	10	0	0
Gm14170	1	0	0	0	0	0	0
Nf2	0	0	0	0	2	0	0
Cfl2	0	0	0	0	48	0	0
1700003F17Rik	0	0	0	0	1	0	0
Trim62	4	0	0	0	0	0	0
Gm12704	11	0	0	0	0	0	0
Gm13674	0	0	0	0	1	0	0
Sertad2	0	0	0	0	3	0	0
Shank3	0	0	0	0	47	0	0
Cyp2e1	0	0	4	0	0	0	0
Gpr158	0	0	0	0	1	0	0
Il33	0	0	0	0	25	0	0
1700026L06Rik	0	0	0	0	1	0	0
AU016765	0	0	0	0	1	0	0
AC158384.1	0	0	1	0	0	0	0
2810025M15Rik	0	0	0	0	24	0	0
Tada2b	13	0	0	0	3	0	5
Nxnl1	0	0	0	0	4	0	4
Plin3	0	0	0	0	16	0	0
Mfsd7c	0	1	0	0	0	0	0
Nudt22	0	0	1	0	7	0	0
Upb1	0	0	0	0	7	0	0
Solh	0	0	0	0	5	0	0
Rars2	0	0	0	0	3	0	0
Grin1	0	0	6	0	1	0	0
Mrps36	9	0	0	0	9	0	0
Fam13c	2	0	0	0	0	0	0
SNORA76	0	0	3	0	3	0	0
Mff	0	0	0	0	26	0	0
Gm10163	0	0	0	0	21	0	0
1700066J24Rik	0	0	0	0	9	0	0
Dio3	1	0	0	0	0	0	0
Btbd2	0	0	0	0	20	0	0
Fam65a	1	0	0	0	25	0	0
Rps6ka3	0	0	0	0	11	0	0
6430548M08Rik	0	0	0	0	13	0	0
Usp5	0	0	0	0	10	0	0
Gm12953	0	0	0	0	1	0	0
Dnajc10	0	0	0	0	18	0	0
Gm9899	0	0	3	0	7	0	0
Gm15285	9	0	0	0	13	0	0
Dirc2	0	0	0	0	28	0	0
Gm13116	0	0	0	0	2	0	0
Gsk3a	0	0	0	0	40	0	0
Slain2	0	0	0	0	15	0	0
Gm14278	0	0	0	0	2	0	0
A930029G22Rik	0	0	1	0	0	0	0
Tmem63c	0	0	0	0	1	0	0
C1ql3	0	0	4	0	0	0	0
Gm13076	0	0	2	0	0	0	0
Supv3l1	6	0	0	0	1	0	0
1700034H15Rik	0	0	0	0	16	0	0
2310006M14Rik	0	0	0	0	3	0	0
Pars2	8	0	0	0	11	0	0
Hcst	0	6	5	0	3	0	0
Ring1	3	0	0	0	9	0	0
Gm5560	0	0	0	0	11	0	0
1300010F03Rik	0	0	0	0	2	0	0
Timm17b	0	0	0	0	2	0	0
Gm17724	0	0	0	0	6	0	0
Nop56	0	0	1	0	12	0	0
Gm17599	0	0	0	0	2	0	0
Gm16094	2	0	0	0	0	0	0
Xrcc3	0	0	9	0	4	0	0
Kctd19	0	0	0	0	3	0	0
Mamstr	0	0	0	0	14	13	0
Gm4799	0	0	0	0	1	0	0
Gm14252	1	0	0	0	0	0	0
Mapk13	0	0	0	0	49	0	0
Trmt12	2	0	0	0	0	0	0
Elovl1	0	0	29	0	13	0	0
Ero1lb	0	0	7	0	0	0	0
Pip5k1a	16	0	0	0	0	0	0
Hist2h3c2	0	0	12	0	26	0	0
Setd6	0	0	15	0	0	0	0
Col23a1	0	0	0	0	7	0	0
Gm12955	0	0	0	0	1	0	0
Shc2	0	0	0	0	20	0	0
Plcb3	0	0	0	0	5	0	0
Pop5	0	0	0	0	42	0	0
Gm10553	0	0	2	0	0	0	0
Slfnl1	0	0	0	0	2	0	0
Depdc7	0	0	1	0	1	0	0
Srp19	0	0	0	0	1	0	0
Nhlrc1	0	0	0	0	5	0	0
Ccdc103	19	0	2	0	20	0	0
Reep6	0	0	0	0	8	0	0
Fuca2	0	0	0	0	14	0	0
Snrpc	1	0	8	0	76	0	0
Mark3	0	1	10	0	0	0	0
C1qtnf9	0	0	0	0	12	0	0
Ankhd1	19	0	0	0	15	0	0
Gm20544	1	0	0	0	18	0	0
Mgll	0	0	0	0	12	0	0
Tnrc18	0	0	4	0	0	0	0
Gm13492	0	0	0	0	0	0	3
Mir701	0	0	0	0	3	0	0
Gm10813	0	0	0	0	1	0	0
Nol3	0	0	0	0	10	0	0
Myh7b	0	0	0	0	5	0	0
Mrps28	0	0	20	0	2	0	0
Slc22a7	0	0	0	0	33	0	0
Pnpla2	0	0	8	0	0	0	0
Cirh1a	0	0	0	0	45	0	0
Gm14379	0	0	0	0	1	0	0
Ipo5	0	0	0	0	30	0	0
Vezf1	2	0	0	0	2	0	0
Dio3os	1	0	0	0	0	0	0
Cops7a	0	0	0	0	10	0	0
Rbm25	0	0	0	0	25	0	0
Haao	11	0	0	0	0	0	0
Gm17103	0	0	0	0	2	0	0
Padi1	1	0	0	0	3	0	0
Gm13780	0	0	0	0	4	0	0
BC002230	0	0	0	0	7	0	0
Itk	0	0	0	0	0	0	9
Sh2d5	0	0	1	0	10	0	0
Gm15484	0	0	3	0	5	0	0
Kank4	0	0	0	0	7	0	0
Adora2a	0	0	0	0	10	0	0
1700007J10Rik	0	0	0	0	1	0	0
Rftn2	0	0	0	0	1	0	0
Aftph	0	0	0	0	30	0	0
Ptpro	3	0	0	0	0	0	0
2210409E12Rik	2	0	0	0	3	0	0
Thop1	0	0	1	0	7	0	0
Cdhr5	0	0	8	0	0	0	0
Cep350	0	0	1	0	1	0	0
Cnot10	0	0	0	0	10	0	0
4631405J19Rik	0	0	0	0	2	0	0
Gss	0	0	0	0	4	0	0
C5ar1	0	0	0	0	6	0	0
Gm13380	2	0	0	0	6	0	0
Gm8055	0	0	0	0	1	0	0
Thap8	0	5	0	0	3	0	0
2210411M09Rik	0	0	0	0	3	0	0
Nkain3	0	0	8	0	0	0	0
Gm16724	1	0	0	0	0	0	0
Gm11515	0	0	0	0	5	0	0
Olfr156	0	0	0	0	1	0	0
Sirt7	0	0	0	0	15	0	5
Magi1	1	0	0	0	0	0	0
Cat	0	0	0	0	18	0	0
Trim50	0	0	0	0	1	0	2
2810408M09Rik	0	0	0	0	4	0	0
1700120E14Rik	0	0	0	0	1	0	0
SCARNA14	1	0	0	0	0	0	0
Fbxo36	0	0	2	0	0	0	0
Polr2f	3	0	0	0	47	0	0
Mir670	0	0	0	0	1	0	0
Acacb	0	0	0	0	24	0	0
4930577N17Rik	0	0	0	0	20	0	0
Nod1	1	0	1	0	0	0	0
Serf1	0	0	0	0	0	0	9
Mrpl12	0	0	0	0	18	0	4
Gm15494	0	0	0	0	1	0	0
Gm6039	0	0	0	0	4	0	0
Churc1	0	0	4	0	22	0	0
Il17c	0	0	0	0	3	0	0
Gatad2a	3	0	7	0	0	0	0
Evc2	0	0	9	0	0	0	0
Pde6g	0	0	0	0	13	0	0
Tepp	0	0	1	0	0	0	0
Crebbp	0	0	0	0	4	0	0
Klhl26	11	0	10	0	0	0	0
Mrps27	0	0	0	0	3	0	1
2810006K23Rik	0	0	0	0	7	0	0
Nudc	0	0	4	0	55	0	0
Ptprf	0	0	26	0	18	0	0
Pmfbp1	0	0	0	0	2	0	0
9130409I23Rik	0	0	0	0	3	0	0
Gm16576	2	0	1	0	0	0	0
Cd8a	0	0	1	0	0	0	0
Gm505	0	0	0	0	18	0	0
Glmn	0	0	0	0	21	0	0
Jsrp1	0	0	0	0	8	0	0
Xab2	0	0	0	0	17	0	0
1700022I11Rik	0	0	0	0	4	0	0
Ttc1	4	0	0	0	0	0	0
Aco2	0	0	0	0	12	0	0
Herc4	4	0	0	0	4	0	0
Dnahc5	0	0	0	0	3	0	0
Wnt1	3	0	1	0	0	0	0
Mthfd2	14	0	0	0	26	0	0
Tnni3	0	0	0	0	18	0	0
Arpc3	0	0	0	0	59	0	0
Zfp292	0	0	0	0	1	0	0
Rnf150	1	0	0	0	0	0	0
Lpin2	6	0	0	0	0	0	0
Gps2	0	5	0	0	17	0	0
Ccdc8	0	0	0	0	2	0	0
1700019N12Rik	0	0	0	0	1	0	0
Ccnt1	7	0	1	0	0	0	0
Stx5a	13	0	0	0	0	0	0
Arid3a	0	0	0	0	40	0	0
Blk	0	0	0	0	3	0	0
Ergic3	3	0	0	0	2	0	0
Sf3b1	0	0	0	0	5	0	0
Mak	0	0	1	0	1	0	0
Adcy6	6	0	1	0	0	0	0
Efemp2	0	0	8	0	0	0	0
Amz2	0	0	0	0	1	0	0
Capzb	15	0	4	0	46	0	0
G530011O06Rik	0	0	0	0	0	0	6
Gm10647	3	0	0	0	0	0	0
Cyp2d40	0	0	0	0	2	0	0
Slfn1	0	0	0	0	1	0	0
Mthfd1l	0	0	6	0	1	0	0
Piwil1	0	0	0	0	2	0	0
Gm17288	0	0	0	0	2	0	0
Bcl7c	0	0	0	0	12	0	0
Sc4mol	0	0	0	0	28	0	0
Fosb	0	0	11	0	2	0	0
Gm17017	1	0	0	0	0	0	0
Gm10167	0	0	4	0	0	0	0
Gdf15	10	0	3	0	0	0	0
SNORD50	0	0	0	0	8	0	0
Syt13	0	0	0	0	1	0	0
2810453I06Rik	0	0	13	0	3	0	0
Anp32e	0	0	8	0	1	0	0
Rpsa	1	0	0	0	82	0	0
Tcerg1	0	0	2	0	0	0	0
Gm16600	0	0	0	0	2	0	3
Gnb5	0	0	0	0	27	0	0
Nrtn	0	0	0	0	15	0	0
Gm7092	0	0	2	0	5	0	0
Snx1	3	0	0	0	13	0	0
Fmod	3	0	0	0	0	0	0
Dguok	14	0	0	0	27	0	0
Lactb2	0	0	0	0	25	0	0
Ttl	0	0	8	0	0	0	0
Rrm1	0	0	1	0	0	0	0
Lzts2	0	0	4	0	0	0	0
Gm13035	0	0	0	0	0	0	1
Pdia2	0	0	0	0	2	0	0
CT010479.1	0	0	0	0	1	0	0
AL603828.1	0	0	1	0	0	0	0
Rps15	0	0	0	0	26	0	0
Gm16892	0	0	0	0	6	0	0
Klb	0	0	0	0	1	0	0
Pus1	0	0	0	0	54	0	0
Gm17606	0	0	0	0	1	0	0
Gm13528	0	0	0	0	1	0	0
Spaca7	0	0	1	0	1	0	0
Ndufb2	0	0	0	0	35	0	0
Tbc1d16	0	0	0	0	18	0	0
Fam32a	0	0	0	0	19	0	0
Gm11584	0	0	0	0	1	0	0
Atrn	0	0	5	0	2	0	0
Gm17213	0	0	0	0	3	0	0
Slc25a3	0	0	0	0	17	0	0
Snn	0	0	0	0	71	0	0
Mdga2	0	0	0	0	3	0	0
Gm10913	0	0	0	0	7	0	0
Tceb3	0	0	0	0	8	0	0
Hmgxb4	0	0	0	0	33	0	0
SNORD11	0	0	0	0	2	0	0
Nol11	0	0	0	0	0	7	7
Kiss1	0	0	0	0	4	0	0
Atg16l1	0	0	0	0	0	0	1
Polr3d	0	0	7	0	21	0	11
Rai1	3	0	7	0	43	0	0
Apbb2	2	0	0	0	0	0	0
Ythdc2	0	0	0	0	2	0	0
Setx	0	0	0	0	5	0	0
Zfp324	0	0	3	0	17	0	0
Arl4d	0	0	0	0	7	0	0
AL669920.1	0	0	0	0	1	0	0
Ino80d	0	0	0	0	1	0	0
Numa1	0	0	3	0	0	0	0
Gm13724	0	0	0	0	4	0	0
Pcp2	0	0	0	0	17	0	0
1700061J23Rik	0	0	0	0	1	0	0
Pcnxl3	0	0	10	0	0	0	0
Mpdz	0	0	0	0	11	0	0
Tmem221	0	0	0	0	5	0	6
Plat	3	0	0	0	0	7	6
BC024978	0	0	0	0	1	0	0
4930572J05Rik	0	1	5	0	0	0	0
Iqch	14	0	0	0	0	0	0
Adssl1	0	0	5	0	6	0	0
Pvrl2	0	0	9	0	0	0	0
Btbd7	12	0	0	0	0	0	0
AC160471.1	0	0	0	0	2	0	0
Hoxa6	0	0	0	0	3	0	0
Zmynd11	0	0	0	0	4	0	0
Ctdnep1	0	4	0	0	11	0	0
Xpo7	0	0	3	0	0	0	0
Cadm4	0	0	0	0	8	0	0
Gm14967	2	0	0	0	1	0	0
Gm14211	0	0	0	0	5	0	0
Psmc4	3	0	0	0	0	0	0
Baz1b	0	0	0	0	10	0	2
Aqp12	0	0	4	0	1	0	0
Pdzrn3	0	0	0	0	14	0	0
Psmb5	2	0	0	0	10	0	0
Serpina1a	1	0	0	0	1	0	0
Ube3b	0	0	0	0	36	0	0
D730040F13Rik	0	0	0	0	22	0	0
Hnrnpul2	15	0	0	0	0	0	0
Dem1	0	0	0	0	32	0	0
AW011738	0	0	2	0	7	0	0
Kcng4	0	0	0	0	3	0	0
Gm9746	8	0	0	0	0	0	0
Gm17359	1	0	0	0	0	0	0
Fam108a	0	0	0	0	19	0	0
Cux1	0	0	0	0	7	0	0
Akt2	0	0	0	0	2	0	0
Hsd17b4	12	0	0	0	0	0	0
Ptdss2	0	0	12	0	0	0	0
Gm8444	0	0	0	0	4	0	0
Rrp8	0	0	0	0	17	0	0
Gm15760	0	0	5	0	8	0	0
4632411B12Rik	0	0	0	0	5	0	0
Ppp5c	0	0	0	0	12	0	0
Myl10	0	0	0	0	2	0	0
Gpr151	0	0	4	0	0	0	0
2010001M06Rik	0	0	0	0	3	0	0
Rpl21	8	0	0	0	5	0	0
Cisd3	0	0	19	0	39	0	0
Higd2a	0	0	3	0	36	0	0
Ntrk1	0	0	2	0	0	0	0
C430014B12Rik	0	0	0	0	4	0	0
Arfgap3	0	6	0	0	4	0	0
Myst2	0	0	1	0	16	0	0
Ppp1r18	25	0	1	0	25	0	0
Mier3	15	0	0	0	73	0	0
Gm16128	13	0	0	0	0	0	0
Prkci	0	0	0	0	23	0	0
Brca2	0	0	0	0	26	0	0
Traf4	0	0	2	0	21	0	0
Tet1	29	0	0	0	0	0	0
Sepsecs	0	0	0	0	11	0	0
Fxc1	0	0	0	0	12	0	0
Proca1	0	0	0	0	12	0	0
Tnpo3	0	0	0	0	2	0	0
Eif4ebp3	16	0	0	0	4	0	0
Atg4d	0	0	0	0	2	0	0
Rasa3	0	0	0	0	23	0	0
Dhx57	0	0	1	0	21	0	2
Nfat5	0	0	0	0	65	0	0
Mllt6	0	0	21	0	36	0	0
4933409G03Rik	0	0	0	0	1	0	0
Car11	0	0	0	0	13	17	0
Tbc1d23	0	0	0	0	40	0	0
2310002J15Rik	0	0	5	0	0	0	0
1700030C10Rik	0	0	3	0	0	0	0
Il17rd	20	0	0	0	0	0	0
Ssu72	0	0	10	0	7	0	0
Sh3bp1	3	0	2	0	36	0	0
Pbxip1	0	0	14	0	0	0	0
Tbc1d13	12	0	0	0	24	0	0
4933411G11Rik	0	0	0	0	1	0	0
1810027O10Rik	0	4	0	0	24	0	0
Zfp354a	0	0	0	0	8	0	0
BC061194	0	0	0	0	22	0	0
Pigw	0	0	0	0	1	0	0
2410006H16Rik	0	0	0	0	19	0	0
Nrarp	0	0	7	0	3	0	0
Ttc22	1	0	0	0	5	0	0
Tmem178	0	0	1	0	0	0	0
Gm17398	0	0	0	0	1	0	0
Hoxb13	0	0	1	0	2	0	0
Tcte1	0	0	1	0	0	0	0
Gm15885	0	0	0	0	1	0	0
Csrp1	0	0	16	0	15	0	0
Gm15754	0	0	0	0	20	0	0
Gm9766	0	0	0	0	18	0	0
Scd1	0	0	2	0	0	0	0
Gm19898	0	0	0	0	3	0	0
Mir1902	0	0	1	0	1	0	0
Purb	3	0	0	0	0	0	0
C1qb	0	0	0	0	10	0	0
Man2b2	9	0	9	0	6	0	4
Gm4969	0	0	4	0	2	0	0
2610528E23Rik	0	0	0	0	12	0	0
Bst2	0	0	0	0	8	0	12
Muc1	0	0	15	0	0	0	0
Kctd20	0	0	0	0	46	0	0
Gm12274	0	0	0	0	3	0	0
Gm16043	0	0	0	0	1	0	0
Dnttip2	0	0	0	0	61	0	0
Gm15792	0	0	1	0	3	0	0
AI481877	0	0	0	0	18	0	0
Sspn	2	0	0	0	19	0	0
Plagl2	0	0	2	0	18	0	0
Prss40	0	0	5	0	0	0	0
Cyp46a1	12	0	2	0	3	0	0
N28178	0	0	0	0	6	0	0
Exosc8	0	0	3	0	31	0	0
E130218I03Rik	0	0	17	0	0	0	0
Zfp932	0	0	3	0	1	0	0
Nr1d1	0	0	1	0	35	0	0
1700030K09Rik	0	0	0	0	23	0	0
Mmrn2	3	0	0	0	1	0	0
Snord23	0	0	0	0	2	0	0
Casp8ap2	0	0	0	0	2	0	0
Neat1	0	0	3	0	0	0	0
SNORA36	0	0	0	0	2	0	0
Cep68	1	0	0	0	0	0	0
Snora61	0	0	0	0	1	0	0
Chrna10	0	0	2	0	0	0	0
4931440L10Rik	0	0	0	0	2	0	0
Eif4e2	0	0	5	0	0	0	0
C030048H21Rik	0	0	5	0	0	0	0
Gm14057	0	0	3	0	3	0	0
Endog	14	0	0	0	29	0	0
Mll2	2	0	1	0	0	0	0
Gm13567	0	0	0	0	1	0	0
Zfp36l2	10	0	0	0	0	0	0
Gm14231	5	0	0	0	13	0	0
Cga	0	0	0	0	1	0	0
C920025E04Rik	0	0	0	0	12	0	0
Gm1082	0	1	0	0	1	0	0
Gm3200	0	0	0	0	63	0	0
Pi4ka	0	0	0	0	2	0	0
Fam35a	2	0	0	0	1	0	0
8430437L04Rik	0	0	0	0	2	0	0
Hoxa10	0	0	0	0	3	0	0
Gm13229	0	0	0	0	0	0	5
Ddx42	0	0	0	0	15	0	0
Herpud1	2	0	0	0	2	0	0
Cyth1	3	0	0	0	10	0	0
Tmem222	0	0	0	0	51	0	0
Adam1a	0	0	0	0	32	0	0
2010001E11Rik	0	0	1	0	0	0	0
Cd68	0	4	0	0	26	0	0
Arfip2	0	0	0	0	12	0	0
Samsn1	0	0	0	0	2	0	0
Spata2l	0	0	27	0	0	0	0
Poc1b	0	0	0	0	22	0	0
Nfasc	0	0	0	0	2	0	0
Rimbp2	0	0	0	0	9	0	0
Gm12103	3	0	0	0	5	0	0
Psmd6	0	0	0	0	21	0	0
Gm15621	0	0	0	0	6	0	0
Ubtd1	0	0	0	0	4	0	0
Gm16866	0	0	0	0	3	0	0
Gm17083	0	0	0	0	21	0	0
Dcaf6	0	0	0	0	23	0	0
Gm17691	0	2	0	0	0	0	0
Scn2b	0	0	8	0	0	0	0
Fbxl20	0	0	3	0	0	0	0
Neurl1a	0	0	0	0	28	0	0
Smap2	0	0	0	0	33	0	0
Ppard	7	0	0	0	68	0	0
Gm17519	0	0	0	0	1	0	0
1810043H04Rik	0	0	0	0	4	0	0
Slc8a2	0	0	0	0	1	0	0
Gm8186	0	0	0	0	2	0	0
Gm9938	0	0	0	0	1	0	0
Trhr2	0	0	0	0	1	0	0
Gm14042	0	0	1	0	2	0	0
SNORA57	11	0	0	0	2	0	0
Car3	1	0	0	0	0	0	0
Gm20501	0	0	0	0	2	0	0
D18Ertd653e	0	0	0	0	1	0	0
Gm17134	0	0	0	0	11	0	0
Gm16001	0	0	0	0	2	0	0
Slc12a4	6	0	0	0	28	0	0
Nsd1	0	0	0	0	9	0	0
Psen1	0	0	0	0	24	0	0
Gm11750	0	0	0	0	3	0	0
Gm6659	0	0	0	0	8	0	0
4930432K21Rik	0	0	0	0	9	0	0
Gm10277	0	0	6	0	9	0	0
Gm14237	0	0	3	0	0	0	0
Phf17	0	0	0	0	26	0	0
Grrp1	0	0	11	0	0	0	0
Tff1	0	0	0	0	3	0	0
Fam63a	8	0	0	0	0	0	0
E130309D14Rik	0	0	0	0	6	0	0
Gm3362	1	0	0	0	2	0	0
Myo1e	0	0	0	0	6	0	0
Acvrl1	0	0	0	0	31	0	0
Atpaf2	3	0	8	0	20	0	0
Gm5054	0	0	0	0	1	0	0
2900093L17Rik	0	0	0	0	5	0	0
Mob4	0	0	0	0	5	0	0
AL596123.1	0	0	2	0	3	0	0
5031439G07Rik	3	8	0	0	1	0	0
Acot6	0	0	0	0	72	0	0
Nespas	0	0	0	0	20	0	0
Enho	0	0	0	0	32	0	0
Cbwd1	1	0	0	0	3	0	0
Gpr56	17	0	2	0	0	0	0
Nfkbie	0	0	2	0	1	0	0
Wdr34	7	0	0	0	29	0	0
Cacnb3	6	0	1	0	0	0	0
Ttc26	0	0	0	0	13	0	0
Nat10	0	0	0	0	14	0	0
Usf2	0	0	7	0	3	0	0
Acot8	0	0	0	0	35	0	0
AC160138.1	0	0	0	0	2	0	0
Gm15347	0	0	0	0	14	0	0
Vmn1r	0	0	0	0	7	1	1
Dbx1	0	0	0	0	1	0	0
Gm4152	1	0	0	0	8	0	0
Cd79b	0	0	0	0	5	0	0
Zmat3	0	0	0	0	6	0	0
AY702103	0	0	0	0	1	0	0
Zfp318	0	0	0	0	54	0	0
Gm6623	0	0	1	0	19	0	0
Tanc2	10	0	0	0	2	0	0
Nolc1	0	0	5	0	2	0	3
C1ql4	0	0	1	0	2	0	0
Dlg2	2	0	0	0	0	0	0
Pum1	0	0	8	0	12	0	0
Ywhae	0	0	6	0	8	0	0
Tspan10	0	0	0	0	4	0	0
St13	0	0	0	0	4	0	0
Col1a1	1	0	0	0	21	0	0
Acat3	0	0	0	0	2	0	0
Zfp334	0	0	0	0	9	0	0
Xbp1	0	0	0	0	4	0	0
Gm13333	0	0	0	0	8	0	0
Fam58b	0	0	0	0	3	0	0
Fhod1	0	0	0	0	9	0	0
Gm15961	0	0	0	0	2	0	0
Sypl2	0	0	0	0	2	0	0
Prodh2	0	0	5	0	1	0	0
Gm15672	1	0	0	0	0	0	0
Clec3b	3	0	0	0	0	0	0
Cdc34	0	0	0	0	53	0	0
Kdm1b	0	0	0	0	5	0	0
Npc2	0	0	0	0	1	0	0
Gm12333	0	0	3	0	4	0	0
Lass1	6	0	13	0	0	0	0
Rfc1	0	0	0	0	3	0	0
Ggn	0	0	0	0	13	0	0
Mtm1	0	0	0	0	3	0	0
Mir760	0	0	0	0	8	0	0
Gm17014	0	0	0	0	7	0	0
4930506C21Rik	0	0	0	0	1	0	0
Aph1a	0	0	7	0	2	0	0
Mavs	0	0	0	0	1	0	0
Hgs	0	0	0	0	13	0	3
Ppp1r2	2	0	0	0	33	0	0
Spon1	0	0	0	0	4	0	0
Phex	0	0	0	0	13	0	0
Apol10b	0	0	1	0	6	0	0
Blvrb	0	0	0	0	1	0	0
2610019E17Rik	0	0	0	0	2	0	0
Prop1	0	0	0	0	11	0	0
Ccl27a	0	0	0	0	27	0	0
Dmwd	0	0	4	0	5	0	0
Ptprj	0	0	0	0	3	0	0
Tsc22d1	0	0	0	0	17	0	0
AL954710.1	0	0	0	0	7	0	0
Appl1	19	0	0	0	0	0	0
Gm4252	0	0	0	0	16	0	0
Gm13370	0	0	2	0	6	0	0
Cyb561d1	0	0	0	0	3	0	0
Hsd17b7	0	0	0	0	5	0	0
Timm9	0	0	0	0	11	0	0
Gm13172	0	0	0	0	1	0	0
Sla2	0	0	0	0	15	0	0
2010317E24Rik	0	0	9	0	0	0	0
SCARNA1	0	0	0	0	6	0	0
Gm14337	0	0	0	0	18	0	0
BC023719	0	0	0	0	1	0	0
Mrps24	4	0	0	0	3	0	0
Gm12622	0	0	0	0	2	0	0
Gnpat	0	0	0	0	18	0	0
Tet2	0	0	0	0	2	0	0
Ssr1	0	0	0	0	40	0	0
Gm15575	0	0	0	0	1	0	0
C030037D09Rik	7	0	0	0	4	0	0
4933426D04Rik	5	0	0	0	7	0	0
4930412L05Rik	0	0	0	0	1	0	0
Gm16189	0	0	0	0	2	0	0
Ptpmt1	0	0	0	0	17	0	0
Pecr	54	0	0	0	12	0	1
Cpa2	0	0	0	0	2	0	0
Crip2	0	0	8	0	1	0	0
Kcng2	2	0	6	0	1	0	0
Gm13157	0	0	0	0	4	1	0
Tnfrsf13c	0	0	0	0	7	0	0
Pik3r2	7	0	7	0	0	0	0
0610010F05Rik	0	0	0	0	15	0	0
Anapc13	0	0	0	0	4	0	0
Sh2b2	0	0	0	0	7	0	0
Psmb11	0	0	0	0	1	0	0
Rsad2	0	0	0	0	17	0	0
Dusp3	0	0	0	0	15	0	0
Defb25	0	0	1	0	0	0	0
Abcc3	0	0	0	0	8	0	0
Gm11585	0	0	0	0	8	0	0
Kif21a	0	0	0	0	22	0	0
Rgp1	0	0	0	0	38	0	0
Ubap1	1	0	0	0	38	0	0
Pik3c2b	0	0	0	0	1	0	0
Krt7	0	0	0	0	11	0	0
Ube2b	0	0	0	0	7	0	0
Pik3r6	0	9	0	0	0	0	0
Gm12692	0	0	0	0	2	0	0
Catsper1	0	0	1	0	0	0	0
Gm16273	1	0	0	0	0	0	0
Gm17678	0	0	0	0	1	0	0
Gm2415	3	0	0	0	0	0	0
Ube2e1	0	0	0	0	18	0	0
Ttc34	0	0	1	0	9	0	0
Ubap2l	3	0	0	0	0	0	0
Lingo4	0	0	0	0	4	0	0
Gm20537	0	0	0	0	26	0	0
Gm16574	0	0	0	0	2	0	0
Ecel1	0	0	4	0	0	0	0
Zbed3	0	0	6	0	0	0	0
2310042E22Rik	0	0	2	0	0	0	0
Zbtb8b	9	0	7	0	5	0	0
Klhl22	0	0	0	0	17	0	0
Gm11647	0	0	2	0	0	0	0
Olfr1378	0	0	0	0	3	0	0
Plxnb2	0	0	0	0	35	0	0
Inpp5k	0	0	4	0	4	0	0
Dhfr	0	0	0	0	2	0	0
Pfdn2	1	5	20	0	0	0	0
Rnf121	0	0	3	0	0	0	0
C330011M18Rik	0	0	0	0	12	0	0
C8g	0	0	5	0	0	0	0
D14Ertd668e	9	0	0	0	0	0	0
Plekhj1	0	0	0	0	18	0	0
Sgcg	0	0	0	0	8	0	0
1500002O20Rik	0	0	0	0	8	0	0
Ctnna3	0	0	0	0	2	0	0
A930017K11Rik	0	0	0	0	2	0	0
Ik	13	0	0	0	5	0	0
Nfe2	0	0	0	0	2	0	0
Gemin7	0	0	18	0	0	0	0
Glb1l	0	0	5	0	0	0	0
Ppp1r15b	0	0	0	0	7	0	0
Mir149	0	0	1	0	0	0	0
Car15	0	0	0	0	16	0	0
Nanos3	0	0	0	0	11	0	0
Mir212	0	0	1	0	3	0	0
Kif3b	0	0	0	0	24	0	0
BC031781	0	0	0	0	13	0	0
Ap2a2	0	0	6	0	1	0	0
Rusc1	0	0	15	0	0	0	0
Polr2l	0	0	2	0	0	0	0
Loxl3	1	0	0	0	3	0	0
Casd1	0	0	0	0	9	0	1
Pnoc	0	0	0	0	14	0	0
Trim41	0	0	0	0	34	0	0
Plekho1	0	0	5	0	1	0	0
Isoc2a	0	0	0	0	36	0	0
4933433G15Rik	0	0	0	0	6	0	0
Col13a1	0	0	0	0	9	0	0
Gm15053	0	0	0	0	1	0	0
AC162464.1	0	0	0	0	1	0	0
Gm9835	0	0	0	0	2	0	0
Gm7381	0	0	0	0	1	0	0
Gm20479	0	0	0	0	1	0	0
Mll1	0	0	1	0	0	0	0
Srm	1	0	0	0	15	0	0
Trove2	0	0	0	0	2	0	0
Gm15195	0	0	0	0	1	0	0
1700020I14Rik	0	0	0	0	3	0	0
Uhrf1bp1	1	0	6	0	66	0	0
Madd	0	0	0	0	11	0	0
Amotl1	10	0	0	0	0	0	0
Gm12481	0	0	0	0	44	0	0
Ctf2	0	0	0	0	11	0	0
Ranbp10	2	0	0	0	37	0	0
Golga5	19	0	0	0	0	0	0
Nr6a1	7	0	0	0	0	0	0
Bsn	0	0	0	0	1	0	0
Mir135b	0	0	0	0	1	0	0
AA467197	0	0	0	0	13	0	0
Smad7	2	0	0	0	72	0	0
Ybey	3	0	0	0	0	0	0
Tax1bp3	0	0	0	0	6	0	0
Nudt18	0	0	8	0	18	0	9
Gm6030	1	0	0	0	0	0	0
Gm13154	0	0	0	0	1	1	1
A930001N09Rik	1	0	0	0	4	0	0
Mfsd3	0	0	3	0	0	0	0
Tssk3	2	0	2	0	0	0	0
AL683847.1	0	0	0	0	1	0	0
Tead3	7	0	0	0	61	0	0
Dfna5	13	0	0	0	0	0	0
Wdr45l	0	0	0	0	5	0	0
Ero1l	0	0	0	0	1	0	0
Mppe1	0	0	13	0	6	0	0
Gm12352	0	0	1	0	0	0	0
Cap1	2	0	2	0	0	0	0
3110056O03Rik	0	0	1	0	19	0	0
Theg	0	0	0	0	4	0	0
Gm14826	0	0	0	0	1	0	0
Pcmt1	0	0	0	0	36	0	0
Mtl5	0	0	0	0	4	0	0
Klk1	0	0	0	0	6	0	0
Hbegf	19	0	0	0	11	0	0
Zbtb40	0	0	0	0	13	0	0
Gpr153	0	2	3	0	33	0	0
Gm17428	0	0	0	0	1	0	0
Arf1	0	0	0	0	13	0	0
Mapk14	0	0	0	0	76	0	0
Pcbp3	5	0	9	0	0	0	0
Exoc3l	0	0	0	0	9	0	0
Papd5	38	0	0	0	82	0	0
Gm12261	0	0	0	0	1	0	0
Gm14321	0	0	0	0	2	0	0
Zfpm1	0	0	1	0	1	0	0
Eftud2	30	0	2	0	26	0	0
Mybph	2	0	0	0	0	0	0
Gtf2i	1	0	0	0	0	0	0
Gm6058	0	0	0	0	17	0	0
Gm13899	0	0	0	0	12	0	0
Gm16523	3	0	0	0	0	0	0
Gm5257	0	0	2	0	0	0	0
Slc2a1	0	0	0	0	4	0	0
Pomp	0	0	0	0	2	0	0
A630055G03Rik	0	0	0	0	24	0	0
Ccdc34	0	0	0	0	26	0	0
Ruvbl1	0	0	0	0	13	0	0
Ndufa8	0	0	0	0	28	0	0
Gm13073	0	0	0	0	1	0	0
Ddrgk1	0	0	6	0	6	0	0
4933425O20Rik	0	0	1	0	5	0	0
Ulk2	0	0	0	0	28	0	0
Gm16997	0	0	1	0	0	0	0
Polr3h	0	0	0	0	11	0	0
Adam1b	0	0	0	0	13	0	0
Maea	0	0	2	0	0	0	0
Gm10684	0	0	3	0	0	0	0
Scp2	1	0	0	0	0	0	0
Snupn	0	0	0	0	32	0	0
D930007J09Rik	0	0	0	0	7	0	0
Zbtb32	0	1	6	0	0	0	0
Rabl5	0	0	0	0	3	0	0
Gm6570	0	0	2	0	0	0	0
Lgr4	0	0	0	0	24	0	0
Gm14586	0	0	0	0	2	0	0
Spin1	0	0	0	0	3	0	0
4930566F21Rik	0	0	1	0	0	0	0
Ccdc144b	0	0	0	0	1	0	0
Inppl1	0	0	2	0	0	0	0
Sox13	0	0	0	0	17	0	0
Gm12986	0	0	0	0	18	0	0
Limk1	1	0	0	0	1	0	0
Nnat	0	0	0	0	17	0	0
Smap1	0	0	0	0	20	0	0
Gm16019	1	0	0	0	0	0	0
Ecsit	0	0	0	0	4	0	0
Mid2	0	0	0	0	7	0	0
Ube2n	0	0	0	0	42	0	0
Gm16310	0	0	0	0	6	0	0
Pglyrp1	0	0	0	0	12	0	0
Akna	16	0	0	0	17	0	7
Kcnk10	0	0	0	0	7	0	0
Mob3a	0	0	0	0	17	0	0
Gm2a	10	0	0	0	0	0	0
Il15ra	0	2	0	0	0	0	0
4930465K10Rik	0	0	0	0	15	0	0
Tex21	0	0	6	0	11	0	0
Yif1b	4	0	0	0	14	0	0
Trim25	0	0	0	0	5	0	1
Tlx2	1	0	0	0	0	0	0
Hk1	0	0	0	0	1	0	0
Vps52	3	0	0	0	8	0	0
Dcun1d4	0	0	0	0	26	0	0
Vkorc1	0	0	0	0	7	0	0
Nes	0	0	4	0	0	0	0
Med15	0	0	0	0	22	0	0
Nmt1	22	0	5	0	25	0	0
Gm10176	0	0	0	0	3	0	0
Trit1	5	0	7	0	0	0	0
Resp18	0	0	4	0	0	0	0
Abhd1	0	0	0	0	13	0	0
Gm15457	0	0	0	0	1	0	0
Lypd6b	0	0	0	0	6	0	0
Snora30	0	0	0	0	6	0	0
Cd300ld	0	0	1	0	0	0	0
B930095G15Rik	0	0	0	0	12	0	0
C330006D17Rik	0	0	0	0	8	0	0
Sv2a	0	0	11	0	24	0	0
Gm14521	0	0	1	0	6	0	0
Rnf34	0	0	0	0	32	0	0
Gm15517	0	0	0	0	3	0	0
Tsc2	0	0	0	0	1	0	0
Kdm3a	0	0	0	0	0	0	1
Rnf139	4	0	0	0	0	0	0
Rel	0	0	0	0	2	0	0
Kcnn2	0	0	2	0	0	0	0
Gstcd	0	0	0	0	4	0	0
Cdc37	0	0	0	0	2	0	0
Spg11	0	0	0	0	14	0	0
Rbm19	0	0	2	0	0	0	0
5031425F14Rik	0	0	0	0	3	0	0
Serinc2	0	0	12	0	18	0	0
Gm7457	0	0	2	0	2	0	0
Arf5	0	0	0	0	25	0	0
1110034B05Rik	0	0	0	0	7	0	0
Ushbp1	0	0	0	0	8	0	12
Myo15	0	0	6	0	1	0	0
Slc6a2	3	0	3	0	0	0	0
Gm9888	0	0	0	0	1	0	0
Oip5	0	0	0	0	6	0	0
Cdh15	0	0	0	0	4	0	0
B3gnt1	0	0	0	0	1	0	0
Nab1	0	0	0	0	12	0	0
Ocel1	0	0	0	0	8	0	17
Tgm7	0	0	0	0	3	0	0
A430005L14Rik	0	0	0	0	1	0	0
Dnajc18	0	0	4	0	7	0	0
Itga11	0	0	3	0	4	0	0
Gm16314	0	0	0	0	1	0	0
Rab7l1	0	0	0	0	15	0	0
4930557C09Rik	0	0	0	0	6	0	0
Palm2	0	0	0	0	7	0	0
0610005C13Rik	0	0	1	0	7	1	0
Gm11434	0	0	0	0	0	0	3
Bet1l	0	0	7	0	0	0	0
Gm10284	0	0	0	0	1	0	0
Rprd2	0	0	2	0	0	0	0
Kazald1	0	0	5	0	0	0	0
Msrb3	0	0	0	0	16	0	0
Gm16007	0	0	0	0	13	0	0
Pqlc3	17	0	6	0	16	0	0
Chrac1	1	0	0	0	0	0	0
Gm4167	0	0	0	0	0	0	2
Snora47	0	0	1	0	0	0	0
Spag5	0	0	1	0	11	0	0
Zfp423	1	0	0	0	36	0	0
Olig1	0	0	0	0	13	0	0
A4galt	0	5	0	0	1	0	0
Prkcd	0	0	0	0	0	0	2
AL672284.1	0	0	0	0	3	0	0
Crtac1	0	0	0	0	1	0	0
Gm17179	0	0	0	0	1	0	0
Gm9222	1	0	0	0	0	0	0
Cd99l2	0	0	0	0	18	0	0
Gpr30	0	0	2	0	0	0	0
Cby1	5	0	2	0	1	0	0
Mns1	0	0	17	0	14	0	0
E130308A19Rik	0	0	0	0	2	0	0
Amfr	1	0	0	0	9	0	0
Zfp646	0	0	0	0	11	0	0
Gm17274	0	0	1	0	0	0	0
Tmem110	0	0	0	0	0	0	3
Pla2g4b	0	0	0	0	1	0	0
4930428E23Rik	0	0	0	0	4	0	0
Taf8	16	0	0	0	0	0	0
Gm13702	0	0	0	0	1	0	0
Rps19	0	0	0	0	13	0	0
Zbtb45	0	0	3	0	22	0	0
Prr24	0	0	0	0	12	0	0
Coil	2	0	0	0	3	0	1
Pgm2	6	0	0	0	12	0	0
Slc11a2	0	0	0	0	30	0	0
Zfp959	0	0	0	0	3	0	0
Mcoln2	0	0	0	0	5	0	0
Gm14966	3	0	0	0	1	0	0
Gm13394	0	0	0	0	3	0	0
Gas6	0	0	0	0	19	0	0
Hsd11b2	1	0	0	0	28	0	0
Ckap5	0	0	0	0	2	0	0
Gm10973	2	0	0	0	0	0	0
Wipf1	0	0	0	0	2	0	0
Atp5e	0	0	0	0	74	0	0
Gm5897	0	0	0	0	4	7	0
Slc17a6	0	0	1	0	0	0	0
Csnk1d	0	0	0	0	14	0	5
Mir503	0	0	0	0	1	0	0
Ccl1	0	0	0	0	1	0	0
Slc25a2	6	0	6	0	0	0	0
Uqcc	1	0	0	0	3	0	0
Ckmt1	0	0	0	0	3	0	0
Gm17241	0	0	0	0	7	0	0
Ganc	0	0	0	0	5	0	0
Fbxw8	0	0	0	0	9	0	0
Hic1	0	0	18	0	42	0	0
Hspb11	8	0	0	0	9	0	0
Ifngr2	4	0	0	0	90	0	0
C77080	15	0	10	0	5	0	0
Ubac1	0	0	26	0	0	0	0
Zfp628	0	0	0	0	31	0	0
Gpr3	0	0	0	0	22	0	0
Gm16740	8	0	0	0	0	0	0
Hsp90aa1	1	0	0	0	0	0	0
Gm16190	0	0	0	0	8	0	0
Adamts8	0	0	3	0	0	0	0
Mdk	1	0	0	0	28	0	0
Hs3st2	0	0	0	0	1	0	0
Bop1	0	0	6	0	0	0	0
Ercc1	0	0	18	0	0	0	0
E130303B06Rik	2	0	0	0	46	0	0
Gm10074	0	0	0	0	12	0	0
Casp9	0	0	10	0	0	0	0
Abcc10	0	0	0	0	17	0	0
Tmed8	0	0	0	0	10	0	0
Gm16046	0	0	0	0	15	0	0
Map2k4	0	0	0	0	7	0	0
Srpk1	1	0	0	0	81	0	0
Olfr315	0	0	0	0	3	0	0
1700007K13Rik	0	0	0	0	5	0	0
Ppm1g	0	0	0	0	17	0	0
Gm17369	0	0	1	0	4	0	0
Rpl9	3	0	0	0	6	0	5
Arhgef19	4	0	9	0	0	0	0
Glt25d1	0	0	0	0	5	0	17
Snrpb	0	0	1	0	11	0	0
C230037L18Rik	0	0	0	0	28	0	0
Ccdc40	0	0	0	0	15	0	0
Gm16077	0	0	0	0	11	0	0
Kidins220	0	1	0	0	0	0	0
Tmem164	0	0	0	0	5	0	0
Med7	0	0	0	0	0	0	9
Ahcy	0	0	0	0	8	0	0
C430048L16Rik	0	0	0	0	33	0	0
Ripply3	0	0	0	0	2	0	0
Phc3	0	0	0	0	10	0	0
Arf3	7	0	1	0	1	0	0
Ngrn	0	0	0	0	8	0	0
Chmp6	0	0	0	0	1	0	0
Gm749	0	0	0	0	2	0	0
C630050I24Rik	0	0	0	0	6	0	0
Sult5a1	0	0	8	0	0	0	0
Fam149a	0	0	0	0	1	0	0
Serpina3g	5	0	0	0	0	0	0
Art1	0	0	3	0	0	0	0
Med31	4	0	0	0	0	0	0
Hmbox1	0	0	0	0	8	0	0
Acsf3	0	1	2	0	10	0	0
Atxn2	0	0	0	0	29	0	0
Ttc13	0	0	0	0	14	0	0
Rpl6	0	0	0	0	54	0	0
Dsg1b	0	3	0	0	0	0	0
Klc4	0	0	0	0	60	0	0
Adam22	2	0	0	0	0	0	0
Acadm	0	0	9	0	0	0	0
4933427G17Rik	0	0	0	0	5	0	0
Med17	2	0	0	0	0	0	0
Glyat	0	0	0	0	5	0	0
Eif1ad	0	0	7	0	0	0	0
Gm20395	0	0	1	0	0	0	0
Alkbh4	0	0	0	0	1	0	0
Pm20d1	0	0	0	0	4	0	0
Smad3	20	0	0	0	0	0	0
Ppp1r16a	0	0	4	0	1	0	0
Tnfrsf17	1	0	0	0	13	0	0
Gnal	0	0	17	0	0	0	0
Dna2	29	0	0	0	0	0	0
Gm17207	0	0	0	0	8	0	0
Snord33	0	0	0	0	3	2	0
Gm17098	1	0	0	0	0	0	0
Tfb1m	0	0	0	0	13	0	0
Nme2	0	0	0	0	3	0	0
BC039771	4	0	0	0	0	0	0
Rasal2	0	0	0	0	21	0	0
Sympk	0	0	5	0	6	0	0
Chrd	0	0	5	0	9	0	0
Tubgcp4	0	0	0	0	19	0	0
Pygo2	0	0	16	0	0	0	0
Gm11185	0	0	0	0	2	0	0
Gm18594	0	0	0	0	1	0	0
Ftsj2	0	0	0	0	0	0	6
Npepps	0	6	10	0	40	0	0
Ankrd12	7	0	0	0	10	0	0
2410017I17Rik	0	0	0	0	8	0	0
Wdr18	0	0	0	0	30	0	0
Fut7	0	0	4	0	0	0	0
Col9a1	0	0	0	0	17	0	0
Elf2	0	0	0	0	44	0	0
Ugt1a10	0	0	0	0	0	0	2
Sod1	0	0	0	0	58	0	0
Clip2	2	0	0	0	0	0	0
Tln1	0	0	0	0	37	0	0
Eif2ak1	0	0	3	0	12	0	0
Gin1	0	0	0	0	12	0	0
Tyro3	0	0	0	0	7	0	0
Gm15980	0	0	1	0	6	0	0
Plin1	0	0	3	0	0	0	0
Gpr88	0	0	0	0	2	0	0
C130026L21Rik	3	0	0	0	0	0	0
Pvr	0	0	2	0	0	0	0
Senp3	0	5	0	0	24	0	0
Bloc1s3	0	0	19	0	0	0	0
4933407I08Rik	0	0	5	0	0	0	0
Bcr	0	0	0	0	20	0	0
Exoc8	0	0	0	0	17	0	0
Gm12036	0	0	0	0	9	0	0
Mlst8	0	0	0	0	1	0	0
Zfp384	0	0	0	0	8	0	0
snoU109	0	0	1	0	0	0	0
Lepre1	0	0	0	0	9	0	0
Kcne3	13	0	0	0	3	0	0
Mamdc4	0	0	7	0	0	0	0
SNORA22	0	0	0	0	2	0	0
Bpnt1	0	0	0	0	16	0	0
Gm15612	0	0	0	0	1	0	0
Prkcq	0	3	0	0	0	0	0
Katna1	0	0	0	0	38	0	0
SNORA81	0	0	0	0	1	0	0
Osbpl9	1	0	0	0	30	0	0
Ncoa2	0	0	0	0	35	0	0
Gm17235	0	0	0	0	1	0	0
2310036O22Rik	0	0	0	0	4	0	0
Gm11741	0	0	7	0	35	0	0
Gpbp1	16	0	0	0	40	0	0
Furin	0	0	0	0	29	0	0
Gm13158	0	0	0	0	1	1	1
Prmt8	2	0	0	0	0	0	0
Med21	3	0	0	0	1	0	0
Kif27	0	0	0	0	57	0	0
Zfp865	0	0	0	0	20	0	0
Ints3	6	0	0	0	6	0	0
Gm8835	0	0	1	0	16	0	0
Fam120a	0	0	0	0	8	0	0
Zxdc	0	0	0	0	2	0	0
Cebpe	0	0	0	0	1	0	0
Tap2	3	0	0	0	7	0	0
Zfyve19	0	0	0	0	2	0	0
1700010K10Rik	0	0	0	0	3	0	0
0610007P08Rik	0	0	0	0	8	0	0
Serping1	1	0	0	0	0	0	0
Gm9493	0	0	0	0	1	0	0
Rab39	0	0	2	0	0	0	0
Hars	8	0	0	0	4	0	0
Ppp1r13l	0	0	17	0	0	0	0
Setd1b	0	0	0	0	13	0	0
Igsf3	0	0	0	0	2	0	0
Scel	0	0	0	0	3	0	0
Tecpr1	0	0	0	0	16	0	0
Zfp668	0	0	0	0	11	0	0
Mrpl49	2	0	3	0	0	0	0
snoU83B	3	0	0	0	0	0	0
St3gal4	8	0	0	0	0	0	0
Dctn4	0	0	0	0	12	0	0
2210411K11Rik	0	0	0	0	32	0	0
5430416O09Rik	0	0	0	0	6	0	0
Klhl31	0	0	0	0	4	0	0
Gm12744	4	0	0	0	4	0	0
Atp5l2	0	0	10	0	10	0	0
Gm13137	0	0	0	0	0	0	1
Eng	0	0	0	0	1	0	0
Pitpnc1	0	0	0	0	0	5	5
Gm17690	0	0	4	0	7	0	0
Gm13875	0	0	0	0	2	0	0
Arhgap39	0	0	1	0	0	0	0
Ndufa6	0	0	0	0	9	0	0
Kcnk7	0	0	2	0	0	0	0
Tigd3	0	0	1	0	0	0	0
BC013529	0	0	0	0	45	0	0
Gm13594	0	0	0	0	9	0	0
Psmg2	0	0	0	0	17	0	0
BC049635	0	0	0	0	3	0	0
Srsf3	0	0	0	0	43	0	0
Slc16a9	1	0	0	0	0	0	0
Gm6404	0	0	2	0	0	0	0
Ifne	0	0	0	0	1	0	0
Clic6	0	0	3	0	21	0	0
Grik4	0	8	0	0	0	0	0
9430070O13Rik	0	0	0	0	2	0	0
Sgpl1	6	0	1	0	1	0	0
8030453O22Rik	0	0	0	0	3	0	0
Gm12983	0	0	2	0	0	0	0
Gpt	0	0	4	0	0	0	0
Slfn9	0	0	0	0	2	0	0
Psca	0	0	2	0	0	0	0
Rps29	0	0	0	0	10	0	0
Zfp354b	0	0	0	0	16	0	0
Zer1	15	0	0	0	29	0	0
Fkrp	0	0	0	0	26	0	0
Hoxc12	0	0	3	0	0	0	0
Jhdm1d	0	0	0	0	5	0	0
D630008O14Rik	1	0	0	0	0	0	0
Gm13638	0	0	0	0	5	0	0
Gm17732	1	0	0	0	0	0	0
Rcbtb2	0	0	0	0	34	0	0
Ccdc28a	0	0	0	0	23	0	0
Golga3	0	0	3	0	11	0	0
Tnnc2	0	0	0	0	11	0	0
Ikbkap	0	0	0	0	18	0	0
Igfbp5	0	0	0	0	0	0	4
Lrsam1	0	0	0	0	3	0	0
N4bp2l2	1	0	0	0	26	0	0
Coch	1	0	0	0	0	0	0
Gm12942	0	0	0	0	3	0	0
Spag9	0	0	0	0	4	0	0
Crtc2	3	0	0	0	2	0	0
Elovl5	0	0	0	0	2	0	0
Il27ra	0	0	0	0	18	0	0
Cdyl2	0	0	0	0	12	0	0
Vps4b	2	0	0	0	0	0	0
Cml1	1	0	0	0	7	0	0
B930036N10Rik	0	1	0	0	0	0	0
Slc30a2	0	0	9	0	0	0	0
Ctsf	0	0	0	0	2	0	0
Nras	1	0	0	0	0	0	0
Gm9154	0	0	0	0	2	0	0
Lrrc47	0	0	0	0	9	0	0
Kbtbd5	0	0	0	0	5	0	0
H2	27	0	1	0	77	0	0
Mmp2	3	0	3	0	0	0	0
0610025J13Rik	0	0	0	0	2	0	0
Tti1	6	0	0	0	3	0	0
2610019F03Rik	0	0	0	0	24	0	0
Gas2	0	0	18	0	0	0	0
Adam24	0	0	0	0	2	0	0
Uqcr11	0	0	0	0	15	0	0
Gm11856	0	0	0	0	2	0	0
Nomo1	0	0	0	0	2	6	0
1500011B03Rik	0	0	0	0	27	0	0
Gm12524	0	0	0	0	1	0	0
Anxa6	10	0	0	0	0	0	0
Gm12266	2	0	6	0	16	0	0
Ahnak2	0	0	6	0	2	0	0
Gm12857	0	0	16	0	1	0	0
Sp9	0	0	0	0	17	0	0
Slc22a21	0	0	0	0	7	0	0
Inhbb	0	0	0	0	5	0	0
Akap8	3	0	0	0	2	0	0
Plvap	0	0	0	0	6	0	10
Gm12447	0	0	0	0	19	0	0
Actl7b	0	0	0	0	3	0	0
Avp	0	0	2	0	0	0	0
Idi1	0	0	0	0	30	0	0
Fhl4	0	0	0	0	8	0	0
snoU89	0	0	0	0	5	0	0
Lats1	0	0	0	0	34	0	0
Gm17669	0	0	0	0	8	0	0
Prtn3	0	0	0	0	23	0	0
Synj2	12	0	0	0	0	0	0
SNORA49	0	0	1	0	15	0	0
Slc25a41	0	0	0	0	1	0	0
E030011O05Rik	0	0	0	0	2	0	0
Peo1	0	0	2	0	0	0	0
Eif4g1	0	0	5	0	10	0	0
Crocc	6	0	9	0	4	0	0
Gm18604	0	0	0	0	9	0	0
Aldh3b2	0	0	0	0	5	0	0
Gm15636	8	0	2	0	1	0	0
Gm15497	1	0	0	0	0	0	0
Rpap1	0	0	0	0	8	0	0
1700022K14Rik	0	0	0	0	1	0	0
Rps20	0	0	0	0	1	0	0
4933432B09Rik	5	0	2	0	0	0	0
1700066J03Rik	0	0	0	0	4	0	0
Bri3	0	0	0	0	17	0	0
Gm11414	0	0	0	0	1	0	0
Rpl26	20	6	0	0	10	0	0
Ubr7	18	0	0	0	0	0	0
Ppp2r2a	0	0	6	0	0	0	0
Gm11928	0	0	0	0	3	0	0
Tmem128	0	0	0	0	1	0	0
Cnih3	0	0	0	0	1	0	0
Glud1	5	0	0	0	1	0	0
Plcd3	16	0	6	0	13	0	0
Gm17560	0	0	0	0	4	0	0
Hsd17b13	2	0	0	0	4	0	0
Rin3	5	0	0	0	0	0	0
Gm20495	0	0	1	0	13	0	0
Hint1	10	0	0	0	0	0	0
AW121686	0	0	0	0	3	0	0
Spata19	0	0	6	0	0	0	0
Tmem232	0	0	0	0	4	0	0
Gm6088	0	0	0	0	2	0	0
Cgn	6	0	0	0	0	0	0
4921507P07Rik	5	0	0	0	0	0	0
Gabbr2	0	0	0	0	4	0	0
Trmt61a	0	0	4	0	0	0	0
Gm20503	0	0	0	0	29	0	0
Car8	0	0	0	0	3	0	0
Sos2	0	0	0	0	18	0	0
Taco1	0	0	0	0	15	0	0
Kank1	2	0	0	0	1	0	0
Dtnbp1	0	0	0	0	7	0	0
Rrh	0	0	0	0	15	0	0
5330429C05Rik	0	0	0	0	1	0	0
Suv420h1	0	0	0	0	9	0	0
Gm12732	0	0	6	0	3	0	0
Gm15582	0	0	0	0	3	0	0
Atg4c	0	0	0	0	23	0	0
Klhl17	0	0	0	0	5	0	0
Serpinb9	0	0	0	0	14	0	0
Gm15952	0	0	0	0	2	0	0
Gm13024	0	0	0	0	0	0	5
Btnl9	0	0	0	0	4	0	0
Ppox	0	4	28	0	0	0	0
B4galt2	0	0	2	0	3	0	0
Gm15726	0	0	0	0	0	0	6
Creg2	0	0	0	0	5	0	0
U12	0	0	0	0	6	0	0
Gm5805	0	0	0	0	10	0	0
AC093451.1	3	0	0	0	3	0	0
Gm13013	0	0	0	0	13	0	0
Atp5c1	0	0	3	0	0	0	0
Plekha1	5	8	0	0	14	0	0
2810417H13Rik	3	0	0	0	17	0	0
Rnd1	6	0	1	0	0	0	0
Gm17364	0	0	0	0	1	0	0
Gm13563	0	0	4	0	0	0	0
Gm13845	1	0	0	0	0	0	0
Gm13260	0	1	0	0	0	0	0
Smad9	0	0	2	0	27	0	0
Phyh	0	0	0	0	1	0	0
Gm17430	0	0	0	0	6	0	0
Psmd5	0	0	0	0	18	0	0
A330009N23Rik	0	0	0	0	5	0	0
Psmb7	5	0	0	0	5	0	0
Zfml	0	0	0	0	4	0	0
Stfa2l1	0	0	0	0	4	0	0
Gm16580	0	0	0	0	1	0	0
Gm12943	0	0	0	0	2	0	0
Art4	3	0	0	0	0	0	0
Olfr1342	0	0	3	0	0	0	0
AC158749.1	2	0	0	0	0	0	0
Bub1b	0	0	0	0	1	0	0
Rfx2	0	0	0	0	19	0	0
Fam124b	0	0	0	0	4	0	0
Alkbh7	0	0	0	0	10	0	0
Tpt1	0	0	3	0	4	0	0
Tex22	0	0	1	0	0	0	0
Gm8619	0	0	0	0	1	0	0
Ucp3	2	0	0	0	16	0	0
BC003965	0	0	6	0	1	0	0
Il12a	1	0	0	0	0	0	0
Gm11401	1	0	0	0	0	0	0
Gm16068	0	0	0	0	1	0	0
Jak2	0	0	0	0	5	0	0
Gm12203	0	0	0	0	2	0	0
Eif4e1b	0	0	0	0	12	0	0
Sept5	0	0	0	0	2	0	0
Hip1r	0	0	0	0	2	0	0
Ilkap	0	0	0	0	23	0	0
Atrnl1	0	0	0	0	23	0	0
Gm10491	0	0	0	0	1	0	0
Rcor1	0	0	10	0	0	0	0
AI413582	0	0	8	0	56	0	0
Set	16	0	0	0	33	0	0
Mir1945	0	0	0	0	7	0	0
Gm11671	0	0	0	0	14	0	0
Gm15559	0	0	0	0	15	0	0
Ak3l2	0	0	0	0	8	0	0
Msh3	0	0	0	0	4	0	0
Brwd1	0	0	2	0	48	0	0
Serpina9	1	0	0	0	0	0	0
Syngr3	0	0	0	0	1	0	0
Sox15	0	2	0	0	27	0	0
Gm6270	1	0	0	0	1	0	0
Mir5104	0	0	0	0	1	0	0
Ankrd23	0	0	0	0	5	0	0
Cd22	0	0	5	0	0	0	0
Gm12167	0	0	0	0	0	0	1
Dsg4	0	1	0	0	0	0	0
Gm2061	0	0	0	0	6	0	0
Mir203	0	0	0	0	2	0	0
1600016N20Rik	0	0	12	0	0	0	0
Nfatc2	0	0	2	0	0	0	0
Tcf7	0	0	0	0	4	0	0
Ecscr	0	0	4	0	10	0	0
Pddc1	0	0	4	0	0	0	0
Cpxm2	2	0	5	0	0	0	0
Pcgf3	0	0	0	0	4	0	0
4930532G15Rik	0	0	0	0	2	0	0
Tnnc1	0	0	0	0	0	0	1
Gm17358	0	0	0	0	3	0	0
Pklr	0	0	6	0	0	0	0
Gm12843	0	0	0	0	2	0	0
Srcin1	0	0	10	0	15	0	0
Gm12230	9	0	0	0	0	0	0
Mup	3	0	0	0	0	0	0
5330430P22Rik	0	0	0	0	5	0	0
Mapkapk3	0	0	1	0	0	0	0
Snord19	0	0	0	0	0	0	2
Fbxw4	0	0	8	0	25	0	38
Xrcc6	0	0	0	0	10	0	0
Txndc17	8	0	0	0	0	0	0
Myh6	0	0	0	0	2	0	0
Bcar1	0	0	0	0	1	0	0
9030624J02Rik	2	0	0	0	0	0	0
Gm15510	0	0	0	0	4	0	0
[truncated: 11,179 more rows]

## Sheet: 7h_TCDD
Supplemental Table 7h: Enhancer peaks linked to DEGs for 'TCDD over Veh' comparison (Figure 5)
Number of peaks in enhancers (for each histone mark) linked to DEGs (Enhancer Atlas, merged anchors)
Genes	Peak count for H3K27ac up peaks	Peak count for H3K4me1 up peaks	Peak count for H3K4me3 up peaks	M_liver_5mo_TCDD.over.VEH	Peak count for H3K27ac down peaks	Peak count for H3K4me1 down peaks	Peak count for H3K4me3 down peaks
Saa3	0	0	0	2.9796	0	0	0
E030018B13Rik	0	0	0	2.51292	0	0	0
Mt1	0	0	0	2.49264	0	0	0
Mt2	0	0	0	2.35564	0	0	0
Themis	0	0	0	1.85158	0	0	0
Ciart	0	0	0	1.78808	0	0	0
Lcn2	0	0	1	1.77282	7	4	0
A930033H14Rik	0	0	0	1.747	0	0	0
Ddit4	0	0	0	1.56694	0	0	0
Usp2	0	0	0	1.52456	4	6	0
Lrtm1	0	0	0	1.52352	0	0	0
Orm3	0	0	4	1.50442	5	0	0
Ccne1	0	0	0	1.43945	0	0	0
Mycn	0	0	0	1.41386	0	0	0
Slc22a27	0	0	0	1.40827	0	0	0
Ly6d	0	0	0	1.40324	0	3	1
Orm2	0	0	4	1.34713	8	0	0
Acot3	0	0	0	1.32176	0	0	0
Ripor2	0	0	0	1.31666	0	0	0
Pnldc1	0	4	0	1.31077	0	0	0
Slc13a5	0	0	0	1.25314	0	0	0
Cxcl13	0	0	0	1.17285	0	0	0
Wee1	0	0	0	1.17193	0	0	0
Slc22a26	0	0	0	1.16918	0	0	0
Herc3	0	0	0	1.11409	0	0	0
Cyp2b9	2	0	0	1.10196	0	0	0
Cyp2g1	4	0	1	1.09499	0	0	0
Per1	0	0	0	1.06513	0	0	0
Lrrc8b	0	0	2	1.06051	0	0	0
Alpk1	0	0	4	1.04209	0	0	0
Map3k6	0	0	9	1.03965	23	0	0
Il15	0	0	0	1.03607	0	0	0
Pkp3	0	0	0	1.00732	5	1	0
Saa2	0	0	0	1.00323	0	0	0
Pced1b	0	0	0	0.999919	0	0	0
Il18bp	0	0	0	0.997197	0	0	0
Vldlr	0	0	0	0.995082	0	0	0
Cxcl14	0	0	0	0.994369	1	0	8
Ihh	1	0	1	0.992942	0	3	0
Ppp1r14a	0	0	0	0.983136	0	0	8
Apcs	0	0	0	0.979778	0	0	0
Ucp2	0	0	0	0.97623	0	1	0
Rcan2	1	0	0	0.965005	0	0	0
Cyp17a1	0	2	0	0.961812	0	0	0
Cirbp	0	0	0	0.961447	34	27	3
Smpd3	0	0	0	0.951565	3	0	0
Rec8	0	0	0	0.950972	0	1	0
Tox	4	0	0	0.945203	0	0	0
Slc46a3	1	0	0	0.942163	0	0	0
Isyna1	0	0	0	0.935788	41	1	0
Gal3st1	0	0	0	0.933911	4	0	0
Wdr6	0	0	0	0.932749	1	7	0
Cyp7a1	0	0	0	0.928186	0	0	0
Gpcpd1	0	0	0	0.927232	0	0	0
Saa1	0	0	0	0.927131	0	0	0
Ppfia4	0	0	0	0.923926	1	6	0
Gas6	0	0	0	0.923908	11	0	0
Osbpl3	0	0	0	0.920745	0	0	0
Azin2	0	0	0	0.912078	0	0	0
Syt1	0	0	0	0.90134	0	0	0
St3gal6	0	0	0	0.897097	0	0	0
Nrg4	11	0	4	0.896228	0	0	0
Mgp	2	0	0	0.895843	0	0	0
Adgrg2	0	0	0	0.87389	0	0	0
Mogat1	0	0	0	0.850373	0	0	3
Mup18	0	0	0	0.849446	0	0	0
Prtn3	0	0	0	0.848242	29	10	0
Mrgpre	0	0	0	0.84597	0	0	0
Cyp2a22	2	0	0	0.843974	0	0	0
Tmem26	0	0	0	0.843404	0	0	0
Tsku	0	0	0	0.843188	0	5	0
Tnfaip8l3	0	0	0	0.842692	0	0	0
Cenpm	6	0	0	0.842532	1	3	0
Gnat1	0	0	0	0.841318	8	3	23
Slc7a5	0	0	0	0.83869	12	8	0
Ssbp4	0	0	0	0.838186	38	1	0
Prex1	0	0	0	0.824101	15	10	0
Arl2bp	0	0	0	0.820138	1	11	0
Srebf1	1	0	0	0.818386	16	1	0
Cd36	4	0	4	0.816473	1	0	0
Sult2a7	0	0	0	0.812181	0	0	0
Il1a	5	0	0	0.811965	3	0	0
Marco	0	0	0	0.810305	0	0	0
Gja4	0	0	0	0.809046	5	2	0
Pcsk4	0	0	0	0.804722	32	11	3
Ccdc171	0	0	0	0.801196	0	0	0
Ildr2	0	0	0	0.799461	0	0	0
Per3	0	0	0	0.799015	0	0	0
Rnf43	0	0	0	0.794928	0	0	0
Clec12a	0	0	0	0.792951	0	0	0
Slc13a3	0	0	0	0.79211	3	0	0
Lrrc29	0	0	0	0.791632	11	16	0
Csf2rb2	0	0	0	0.791306	2	0	5
Cyp46a1	0	0	0	0.789994	9	0	0
Axin2	0	0	0	0.787157	0	0	0
Cd163	1	0	0	0.786314	2	1	0
Asb2	0	0	0	0.779223	0	0	0
1810058I24Rik	0	0	0	0.776981	0	0	0
Acpp	0	0	0	0.77614	0	0	0
Arl4d	0	0	0	0.775867	14	4	0
Tlr2	0	0	0	0.773315	0	0	0
Kcna2	0	0	0	0.772992	9	0	0
Cyp2c39	0	0	0	0.771713	0	0	0
Sult5a1	0	0	0	0.765636	1	0	0
Crybg2	0	0	0	0.765188	0	0	0
Serpina3n	0	0	0	0.75875	0	0	0
Jaml	0	0	0	0.753925	0	0	0
Acot11	0	0	0	0.752344	15	0	0
Wipf3	2	0	0	0.749712	2	0	0
Ly75	0	0	0	0.745929	0	0	0
Ripply1	0	0	0	0.745865	0	0	0
Fam83f	0	0	0	0.745116	0	0	0
Sipa1l2	0	0	0	0.744489	3	5	0
Rdh9	0	0	0	0.74111	0	0	0
Sprn	0	0	0	0.740192	0	0	0
Map2k6	3	0	0	0.736429	0	0	0
Pdzrn3	3	0	0	0.735827	0	0	0
Tenm3	0	0	0	0.732576	0	0	0
S100a9	0	0	0	0.732471	0	0	0
Cdt1	0	0	0	0.730741	3	0	0
Brca2	2	0	0	0.726591	0	0	0
Armcx4	0	0	0	0.722442	0	0	0
Sspn	0	0	0	0.721	4	0	0
Cd300lb	0	0	0	0.718898	0	0	0
Mms22l	0	0	0	0.718828	0	0	0
Cpne8	0	0	0	0.715675	0	0	0
Slc41a3	0	0	0	0.715516	3	0	4
Cebpd	0	0	0	0.710148	0	0	0
Chpf2	1	0	0	0.708795	0	12	0
Prg4	0	0	0	0.708535	0	0	0
1810046K07Rik	0	0	0	0.707466	0	0	0
Adora1	2	0	0	0.698689	2	6	0
Aif1	0	0	0	0.693779	3	0	0
Efr3b	0	4	0	0.692618	7	0	0
Mup9	0	0	0	0.692257	0	0	0
Slc35f2	0	0	0	0.692256	0	0	0
Psd4	0	0	0	0.690859	0	0	0
Plekhm3	0	0	0	0.689164	0	0	0
Slc5a6	0	0	0	0.688422	16	0	0
Kcnk5	3	0	0	0.683747	0	0	0
Orm1	0	0	4	0.681439	8	0	0
Cyp2a5	4	0	1	0.680615	0	0	0
Limd2	0	0	0	0.67787	0	0	2
Syt12	0	0	0	0.676941	1	5	0
Ear2	0	0	0	0.674548	0	0	0
Cd5l	0	0	0	0.673665	0	0	0
Fgfrl1	0	0	0	0.671793	0	4	13
Pde1a	0	0	1	0.669316	0	0	0
Parp10	0	0	0	0.668673	7	25	0
Arhgap9	0	0	0	0.668076	9	0	0
Plekhg5	0	0	0	0.666393	25	5	0
Cpsf4l	0	0	0	0.660411	0	0	0
Cidec	0	0	0	0.655788	1	0	0
Elmo1	0	0	0	0.654987	0	0	0
Fam102a	0	0	1	0.654602	3	14	0
Gramd1c	0	0	0	0.650163	0	0	0
Tcf19	0	0	0	0.649985	5	1	0
Slc16a12	0	0	0	0.646942	0	0	0
Plcb2	0	0	0	0.646512	0	0	0
Eda	0	0	0	0.64552	0	0	0
Flot1	0	0	0	0.645367	2	8	0
Sema5b	0	0	0	0.642186	0	0	0
Dgke	0	0	0	0.640244	0	0	0
Fus	0	0	0	0.639981	0	1	0
Spp1	0	0	0	0.637911	0	0	0
Eif4e3	0	0	0	0.632986	8	0	0
Ank3	0	0	0	0.632021	0	0	0
Apbb1ip	0	0	0	0.631939	0	0	0
Abcd2	0	0	0	0.630647	0	0	0
Tlr5	0	0	0	0.628207	0	0	0
Lipg	0	0	0	0.626075	0	0	0
Nmnat3	0	0	0	0.625973	0	0	0
Tbx3	0	0	0	0.625413	0	0	0
Tle3	2	0	0	0.623107	11	0	0
Igsf8	0	0	0	0.622556	19	2	0
Fam117a	0	0	0	0.618075	7	4	0
Dbp	0	0	0	0.618019	28	2	0
Tspan4	0	0	0	0.616723	10	15	0
Tcf7	0	0	0	0.616034	2	4	0
Disp2	0	0	0	0.615848	0	0	0
Mafb	3	0	0	0.61401	0	0	0
Nr3c2	0	0	0	0.61372	0	0	0
Pla2g7	2	0	0	0.613663	2	0	1
Ddx60	0	0	0	0.610202	0	0	0
Dnajc12	1	0	0	0.609103	0	0	0
Nr1i3	0	0	0	0.607512	2	5	0
Il10ra	5	0	0	0.605791	0	0	0
Lgr5	1	0	0	0.60441	0	0	0
Wdr62	0	0	0	0.60361	0	0	0
Syne4	0	0	0	0.603459	0	0	0
Extl1	0	0	0	0.601761	0	3	0
Tspan15	0	0	0	0.59913	0	1	0
Cln6	0	0	0	0.599057	8	6	0
Pacs1	0	0	0	0.598862	0	3	5
Flot2	0	0	0	0.598586	2	0	0
Fam129b	0	0	1	0.598282	5	13	0
Abcg1	0	0	0	0.597888	1	0	0
Sgk1	0	0	0	0.597128	0	0	0
Pla2g15	0	0	0	0.596205	2	0	0
Timd4	0	0	0	0.5962	0	0	0
Cd14	0	0	0	0.595741	0	4	0
Sp5	0	0	0	0.592105	0	0	0
Gtf2a2	6	0	0	0.590354	1	0	0
Cntnap1	0	0	0	0.589641	6	1	0
Usp28	76	0	0	0.587397	0	0	0
Nkd1	0	0	0	0.58563	0	6	0
Rab27a	0	0	0	0.585239	0	0	0
Glul	4	0	0	0.585083	1	0	0
Svs1	1	0	1	0	0	0	0
D830050J10Rik	0	0	3	0	1	1	0
Gm4577	0	0	0	0	0	1	0
Gm17525	0	0	0	0	0	1	0
C1galt1c1	3	0	0	0	0	0	0
Gm11874	0	5	0	0	0	0	0
Arid2	2	0	0	0	2	0	0
Cyth1	0	0	0	0	3	7	0
Abcf2	1	0	0	0	0	15	0
2810468N07Rik	0	0	0	0	2	0	0
Mdk	0	0	0	0	22	0	0
Tbx6	0	0	0	0	2	0	0
Pmp2	0	0	0	0	2	0	0
Ankmy1	0	0	0	0	1	0	0
Tbx1	0	0	0	0	1	4	0
Stx12	0	0	10	0	30	0	0
Gm15706	0	0	0	0	0	0	2
Mpzl3	7	0	0	0	2	0	0
Gm10136	0	0	2	0	0	0	0
Enho	1	0	0	0	0	0	0
Dpcd	0	0	0	0	0	5	0
Ptcra	0	0	0	0	2	0	0
Tex22	0	0	0	0	7	9	0
9330151L19Rik	0	0	0	0	1	0	0
Zadh2	0	0	2	0	0	0	0
Hoxb9	0	0	0	0	0	0	3
B230206H07Rik	0	0	0	0	2	4	0
Doc2g	0	0	0	0	2	0	0
H2afy	0	0	0	0	0	0	19
Gm17589	0	0	0	0	0	0	1
Tulp4	0	0	0	0	10	13	0
Gm6320	0	0	0	0	4	0	0
Scarf1	0	0	0	0	1	0	0
Plekha8	3	0	0	0	7	0	0
Tpm3	0	0	0	0	2	0	0
Cdc27	0	0	12	0	2	0	0
Sp9	0	0	0	0	1	0	0
Grm2	0	0	0	0	0	1	0
C5ar1	0	0	0	0	0	4	0
Agxt2	0	0	1	0	0	0	0
Cpeb2	0	7	0	0	1	0	0
Gm6565	0	0	0	0	5	0	0
2900056M20Rik	0	0	0	0	1	0	0
Ddx56	0	0	0	0	0	1	11
Akr1c13	1	0	0	0	0	0	0
Slc39a14	0	0	0	0	10	0	0
Luc7l	0	0	0	0	2	3	0
Gcgr	0	0	0	0	5	0	0
Nudt2	9	0	0	0	0	2	0
Kcne4	0	0	0	0	0	0	3
2010107H07Rik	0	0	0	0	2	0	0
Ptms	0	0	0	0	11	0	0
Klrb1c	8	0	0	0	0	0	0
Nfic	0	0	0	0	10	18	0
Gm7099	0	0	0	0	0	2	0
Adamts6	0	0	1	0	0	0	0
4933427I04Rik	4	0	0	0	0	0	0
Myl10	0	0	0	0	0	1	0
Gm12231	0	0	0	0	0	3	2
Gm15538	0	0	0	0	20	0	0
Gm9765	1	0	0	0	0	2	0
Adm	4	0	0	0	0	0	0
Hist1h2ak	0	21	0	0	0	0	0
Mir3082	0	0	0	0	2	0	0
Mgat4b	1	0	0	0	0	0	0
Gm14556	2	0	0	0	0	0	0
C030030A07Rik	1	0	0	0	0	0	0
Ets2	1	0	0	0	1	0	0
Wdr34	0	0	0	0	10	2	6
Megf9	1	0	0	0	0	0	0
Etohd2	0	0	0	0	3	0	0
Abhd4	0	0	0	0	0	1	0
Pgap3	0	0	0	0	0	10	0
Rpl3	0	0	0	0	3	5	0
9230105E05Rik	0	0	0	0	1	0	0
Rcl1	0	0	4	0	0	0	0
Stx8	0	0	0	0	2	0	0
Rhof	0	0	0	0	3	0	1
Gm8738	0	0	1	0	0	0	0
Ccs	0	0	0	0	0	16	5
Cndp2	0	0	2	0	0	0	0
Cdh26	2	0	0	0	0	0	0
Gm12791	0	2	0	0	0	0	0
Adap1	0	0	0	0	18	0	1
Gm12094	0	0	0	0	0	3	0
Tor2a	0	0	1	0	4	15	0
2410003K15Rik	3	0	3	0	0	0	0
Itpkc	4	0	0	0	1	0	0
Slc30a3	0	0	0	0	14	0	0
3010027C24Rik	0	0	0	0	1	0	0
Fam75d3	0	0	0	0	2	0	0
Efhd1	0	0	0	0	3	0	0
Aim1	2	0	0	0	0	0	0
Ndufb10	0	0	0	0	19	8	3
Lypd3	0	0	0	0	4	0	0
Cdk9	0	0	1	0	5	19	0
Fzd2	0	0	0	0	8	3	0
Tcea3	2	0	0	0	6	4	0
Gm13597	2	0	0	0	0	0	0
Cadm3	1	0	0	0	0	0	0
2610002I17Rik	0	0	0	0	22	0	0
Fam38a	0	0	0	0	4	0	0
Ankrd34a	0	0	0	0	2	0	0
Terf2ip	0	0	0	0	0	1	0
Bap1	0	0	0	0	1	0	0
Ewsr1	0	0	0	0	4	5	0
Col5a1	0	0	0	0	1	0	0
Zfp597	1	0	0	0	21	0	0
Gm13772	0	0	0	0	8	0	0
Ttll3	0	0	0	0	2	0	0
AI597468	0	0	0	0	10	0	0
Poc1a	0	0	0	0	15	13	0
Gm9746	1	0	2	0	0	0	0
Rab3gap2	0	0	0	0	13	0	0
Klhdc8b	0	0	0	0	1	6	0
Cebpb	0	0	0	0	7	0	0
Lsmd1	0	5	0	0	9	3	0
Itga4	5	0	0	0	0	0	0
Panx2	0	0	0	0	0	2	0
Hoxb3os	0	0	0	0	0	0	2
Ankrd27	0	0	0	0	3	0	0
2310044G17Rik	0	0	0	0	10	0	0
Gm11434	0	0	0	0	1	0	0
Mpdz	0	0	0	0	11	0	0
Cdk5r2	0	0	1	0	0	5	0
Gm12748	0	0	0	0	0	3	0
Cd3d	7	0	0	0	2	0	0
Alx4	0	0	0	0	1	0	0
Cyp4a14	0	0	0	0	1	0	0
2900092E17Rik	0	0	0	0	2	0	0
Gm4604	5	0	0	0	0	0	0
Scrn3	0	0	0	0	1	0	0
Bmper	3	0	0	0	0	0	0
Tnks	6	0	0	0	0	0	0
Hip1	0	0	0	0	4	0	0
Ccl27a	1	0	0	0	0	0	0
Pitpnb	0	0	0	0	3	14	0
Gm11517	0	0	0	0	7	12	0
Ftl2	0	0	0	0	0	0	1
Crtc3	0	0	0	0	0	0	17
Ccdc37	0	0	0	0	0	0	1
2310003H01Rik	0	0	0	0	14	6	0
Gm16078	0	0	0	0	2	0	0
Masp1	0	0	0	0	4	0	0
Gm9506	0	0	0	0	0	2	0
Ube2e3	6	0	0	0	0	0	0
Pacsin3	0	0	0	0	18	4	0
Rbfox3	0	0	0	0	4	9	1
Wfdc16	0	0	0	0	1	0	0
Szt2	0	0	0	0	38	0	0
Hnrnpk	0	0	0	0	0	2	0
Atp1b2	0	4	0	0	10	4	0
Cda	0	0	0	0	0	1	0
Rpl19	5	0	0	0	6	10	0
Smoc1	0	0	3	0	1	0	0
Nkpd1	0	0	0	0	5	0	0
Gm15552	0	0	0	0	0	1	0
Gm13156	0	0	0	0	0	5	0
Ulk3	0	0	0	0	2	8	8
Arfip1	0	0	2	0	0	0	0
Sytl1	0	0	9	0	23	0	0
Meox1	0	0	0	0	15	8	0
Tsnax	0	0	0	0	1	6	0
Eif3a	0	0	0	0	2	0	0
Naglu	0	0	0	0	6	1	0
Dph5	1	0	0	0	0	0	0
Diras1	0	0	0	0	24	6	0
Nars	1	0	0	0	0	0	0
1700123O20Rik	0	0	0	0	0	2	0
Dnd1	0	0	0	0	0	4	0
Thsd4	0	0	0	0	0	1	0
Kars	0	0	0	0	0	1	0
Gm3470	0	0	0	0	0	2	0
Mtmr2	0	0	1	0	0	0	0
Tkt	0	0	0	0	9	0	0
Gm11212	0	0	4	0	2	0	0
Gm17549	0	0	0	0	1	0	1
Coro1b	0	0	0	0	3	10	0
Kif9	0	0	0	0	9	0	0
Maea	0	0	0	0	8	2	0
Srpk1	0	0	0	0	0	0	9
Rp9	0	0	0	0	1	0	0
Gm20511	0	0	0	0	3	3	0
SNORD91	0	0	0	0	0	1	0
Pygm	0	0	0	0	8	1	0
D330041H03Rik	0	0	0	0	8	10	2
Slc38a1	1	0	0	0	5	0	0
Gstm1	0	0	0	0	11	1	1
4933403G14Rik	0	0	0	0	2	0	0
Gm12908	0	0	0	0	1	1	0
Adarb1	0	0	0	0	4	0	0
Zfp579	0	0	0	0	9	0	0
Cfb	0	0	0	0	5	3	0
C920011F04Rik	0	0	0	0	1	0	0
Cd69	1	0	0	0	0	0	0
Cct3	0	0	1	0	4	3	0
Pisd	4	0	0	0	23	24	0
Msh5	0	0	0	0	3	2	0
Spo11	0	0	0	0	1	0	0
Dnalc4	0	0	0	0	4	6	0
Mbnl1	2	17	17	0	0	0	0
Hmgn3	1	0	2	0	0	0	0
Zfp39	0	0	0	0	0	1	0
Pparg	0	0	5	0	0	0	0
Gm13068	0	0	0	0	3	1	0
Gm12099	0	0	0	0	3	0	0
Spag8	0	0	0	0	3	0	0
Padi1	0	0	0	0	1	0	0
Wbscr27	0	0	0	0	5	0	0
Ubtd2	0	0	0	0	4	1	0
Cybasc3	0	0	0	0	3	0	10
2410002I01Rik	0	0	0	0	12	7	0
Plvap	0	0	0	0	0	0	2
Dnajc11	0	0	0	0	18	3	0
Abhd11	0	0	0	0	9	0	0
Wiz	0	0	0	0	4	0	3
Adck3	0	0	0	0	5	0	0
Bnip2	6	1	0	0	1	0	0
Gm12348	0	0	0	0	1	0	0
Fam72a	0	0	0	0	3	0	0
Fbxw8	0	0	0	0	0	4	0
Nova2	0	0	0	0	0	0	11
Zc3h6	1	0	0	0	0	0	0
Dgki	7	0	0	0	0	0	0
Ssxb1	0	0	0	0	0	0	1
Smpdl3a	0	0	0	0	0	40	0
Marveld1	0	0	0	0	0	2	0
Gm11470	0	0	0	0	1	2	0
Mrpl48	0	0	0	0	1	1	0
Tob1	0	0	0	0	16	8	0
Nudt3	0	0	0	0	5	7	1
Lrig1	4	0	0	0	2	0	0
Rac3	0	0	0	0	11	1	0
AC087117.1	0	0	0	0	2	1	0
Use1	0	0	0	0	0	0	2
2810432L12Rik	1	0	0	0	0	0	0
Trim37	0	0	0	0	0	3	0
Blmh	0	0	1	0	0	6	0
2700060E02Rik	2	0	0	0	0	0	0
Gm14488	0	0	0	0	1	0	0
Tex24	0	2	0	0	0	0	0
Pdk1	4	0	0	0	0	0	0
Snx6	7	0	0	0	0	0	0
Trap1	1	0	0	0	16	0	1
Gm16066	0	0	0	0	1	0	0
Adrb3	0	41	0	0	4	0	0
Dlx4	0	0	0	0	0	4	0
Gm15995	0	0	0	0	3	3	0
Ckap4	0	0	0	0	4	0	0
Olfr1359	0	1	0	0	0	0	0
Tmem43	3	0	0	0	0	0	0
Dok2	0	0	0	0	6	0	0
Hist1h2an	0	17	0	0	0	0	0
Fuca1	2	0	0	0	9	0	0
Tars2	0	0	0	0	0	15	0
Dffa	0	0	0	0	0	11	0
Zfp276	0	0	0	0	4	0	0
Cmtm8	0	0	0	0	0	4	0
1200009I06Rik	0	0	0	0	8	3	0
Vmn1r223	0	0	1	0	0	0	0
Lbx1	0	0	0	0	0	4	0
Thap11	0	0	0	0	13	5	0
Pcp4l1	1	0	0	0	2	6	0
Gm10501	0	0	0	0	3	0	0
Gm10863	0	0	0	0	1	2	0
Slc1a5	0	0	0	0	2	6	0
Abca5	2	0	0	0	0	0	0
Ccdc130	0	0	0	0	0	3	0
Prdx3	0	0	0	0	1	0	0
Il1rap	0	1	0	0	0	0	0
Gm16845	0	0	0	0	1	0	0
Gm15498	0	0	0	0	2	0	0
Gm11714	0	0	0	0	2	0	0
Lcn4	0	0	0	0	2	0	0
Rab5c	0	0	1	0	6	2	0
Tm4sf5	0	0	0	0	1	0	0
C330006K01Rik	0	0	0	0	5	6	0
Gm17292	0	0	0	0	3	0	0
Setd8	0	0	0	0	2	0	4
Glt25d1	0	0	0	0	0	0	2
Tsnaxip1	0	0	0	0	2	3	0
Dph1	0	0	0	0	1	4	0
Trip12	2	0	0	0	0	0	0
Vti1b	3	0	0	0	0	0	0
Rpgrip1l	0	1	0	0	3	0	0
Slc10a4	0	0	0	0	1	0	0
Snrpf	2	0	0	0	0	0	0
Psmc5	0	0	0	0	0	0	2
Abcb8	1	0	0	0	0	18	0
Gm12990	0	0	0	0	0	3	0
Hoxb5	0	0	0	0	0	0	3
Ankhd1	0	0	0	0	0	7	0
Lmo1	0	0	0	0	0	3	0
Stra6	0	0	0	0	0	3	0
2410022L05Rik	0	0	0	0	10	1	0
Kcnh2	0	0	0	0	0	18	0
Hnrnpr	0	0	0	0	6	4	0
8430427H17Rik	0	0	0	0	36	0	0
Plcb3	0	0	0	0	23	18	2
Pth2	0	0	0	0	1	4	0
Tnfrsf17	0	0	1	0	2	0	0
Nusap1	0	0	0	0	5	1	4
Kcp	0	0	0	0	0	5	5
Lss	0	0	0	0	2	0	0
Aox1	0	0	0	0	5	0	0
Gm12039	0	1	0	0	0	0	0
Cpne1	0	0	0	0	2	0	0
E230008N13Rik	0	0	1	0	0	0	0
Vps37d	0	0	0	0	7	0	0
Gm15511	0	4	0	0	2	0	0
Mbd3	0	0	0	0	38	25	3
Mrpl12	0	0	0	0	23	7	0
P2rx4	3	0	0	0	3	0	8
SNORA4	0	0	0	0	4	0	0
Chac2	0	0	0	0	4	0	0
Mmd2	0	0	0	0	3	3	0
Hepacam2	0	0	3	0	0	0	0
Naa25	0	0	0	0	1	0	0
Sh2b1	0	0	0	0	2	0	0
Rfc4	0	0	0	0	16	0	0
Tmem81	3	0	0	0	6	0	0
Oxa1l	0	0	0	0	0	2	0
Dcaf12	9	0	0	0	2	3	0
Mrpl43	0	0	0	0	0	12	0
Nol11	0	0	0	0	3	0	0
Gm13239	0	0	0	0	0	2	0
C1rl	0	0	0	0	2	1	0
Upk2	0	0	0	0	1	0	0
Fam192a	0	0	0	0	0	4	0
Gal3st3	0	0	0	0	0	0	6
Gpx3	0	0	0	0	0	1	2
Scamp3	0	0	0	0	3	4	0
Bai2	0	0	0	0	5	0	0
Napa	0	0	0	0	2	4	0
Gm11435	0	0	0	0	1	0	0
Tlx1	0	0	0	0	0	2	0
1700129C05Rik	4	0	0	0	0	0	0
Mpi	0	0	0	0	2	6	6
Ada	0	0	5	0	2	1	0
Gm4934	0	0	0	0	2	0	0
Slc12a9	0	0	0	0	7	0	0
Sypl	14	0	0	0	0	0	0
Gm10060	0	0	0	0	0	1	0
9130401M01Rik	0	0	0	0	2	3	0
Serpina3g	0	0	0	0	5	0	0
Taf7	0	0	2	0	0	0	0
Vhl	0	0	0	0	1	0	0
Myo18a	0	0	0	0	0	3	0
Anapc5	1	0	0	0	6	0	3
Eml1	0	0	0	0	12	0	0
Ly6g6d	0	0	0	0	3	0	0
2410001C21Rik	0	0	0	0	2	0	0
1700039E22Rik	0	0	0	0	0	1	0
Gnat3	3	0	3	0	1	0	0
Syngr2	0	0	0	0	0	1	0
Gm13230	0	0	0	0	0	3	0
Ehd4	0	0	0	0	9	5	0
Crip1	0	0	0	0	18	25	0
Zfp446	1	0	0	0	0	0	0
Tes3	0	0	0	0	0	0	3
Ccnb2	10	0	0	0	0	0	2
Gm16188	0	0	0	0	1	1	0
Cacna1d	0	0	0	0	6	0	0
Atad3a	0	0	0	0	1	6	0
Ptrh2	0	0	0	0	0	2	0
Nt5c3l	0	0	1	0	3	2	0
4933400A11Rik	0	3	1	0	0	0	0
Mrps21	0	0	0	0	0	15	0
Adam17	0	0	2	0	0	0	0
Gm15180	0	0	0	0	0	0	2
Vmp1	0	0	0	0	0	1	0
Atg4d	0	0	0	0	8	0	0
Pax2	0	0	0	0	0	3	0
Gm11278	0	1	0	0	0	0	0
Camkv	0	0	0	0	0	5	9
Irf5	0	0	0	0	1	15	16
Ate1	1	0	0	0	4	0	0
Def6	0	0	0	0	8	0	22
Gm11542	0	0	0	0	1	0	0
Gm15235	0	0	0	0	0	0	5
Capn8	4	0	0	0	0	0	0
U1	17	0	2	0	13	17	4
Ercc2	0	1	0	0	5	1	0
1700047F07Rik	0	0	0	0	1	0	0
Csnk1a1	0	0	0	0	8	0	0
Wdr48	0	0	0	0	1	0	1
Tbata	0	0	0	0	7	0	0
Stard10	0	0	0	0	1	0	0
Cnfn	0	0	0	0	1	0	0
Cdk5rap3	0	0	0	0	9	20	0
Tctn2	0	0	0	0	1	0	1
1200011I18Rik	0	0	0	0	0	0	2
Slc29a2	0	0	0	0	0	7	7
Gm17370	0	0	0	0	0	0	3
2810004N23Rik	0	0	0	0	1	6	0
Rab8a	10	0	0	0	0	0	0
Dock1	1	0	0	0	0	0	0
Hmga2	0	0	0	0	4	0	0
Gm13879	0	0	0	0	1	0	0
Tbx4	0	0	0	0	5	0	0
D830039M14Rik	7	0	0	0	4	0	0
Atp5j2	2	0	0	0	0	0	0
Gm11769	0	0	0	0	5	2	0
Usp43	0	0	0	0	0	0	1
Crebl2	0	0	0	0	0	2	0
Smarcd2	0	0	0	0	2	0	2
Ccl5	0	0	0	0	1	1	0
Eml5	0	0	0	0	1	1	0
Mir181b	1	0	0	0	0	0	0
Cyp3a44	0	1	0	0	0	0	0
Pdzd9	0	2	0	0	2	0	0
Gm16099	0	0	0	0	1	3	0
Becn1	0	0	0	0	7	3	0
Ppdpf	0	0	0	0	4	0	0
Mrps10	0	0	0	0	12	0	2
1810011H11Rik	0	0	0	0	1	0	0
Slamf9	0	0	0	0	14	0	0
Rad1	0	0	1	0	0	0	0
Lmbr1	0	0	0	0	0	1	0
1700020L24Rik	0	0	0	0	1	1	0
Sema6a	0	0	0	0	0	22	0
5033414D02Rik	0	0	5	0	0	0	0
Iqce	0	0	0	0	0	6	0
Mybpc3	0	0	0	0	15	3	0
Kcne3	2	0	0	0	0	0	0
Zswim5	0	0	0	0	1	0	0
Tmem121	0	0	0	0	7	7	0
Nup85	0	0	0	0	7	4	0
Mir3960	0	0	1	0	4	2	0
Rsf1	0	0	0	0	18	0	0
Gm14137	0	0	0	0	0	4	9
Mtus2	1	0	0	0	0	0	0
Ppp6c	0	0	0	0	2	0	0
Gm6821	0	0	0	0	0	1	0
Gm5678	0	0	0	0	1	0	1
Arhgef4	4	0	0	0	0	0	0
Smpd2	0	0	0	0	0	6	0
Jak2	0	0	5	0	0	0	0
Gas8	0	0	0	0	4	0	0
Ccnf	0	0	0	0	4	0	0
Shb	0	0	0	0	1	0	0
Rpl27	0	0	0	0	19	13	0
Cd3g	7	0	0	0	8	0	0
Hsdl1	0	0	0	0	2	3	0
Ywhaq	0	0	2	0	0	0	0
4933403O03Rik	0	0	0	0	0	5	0
Gm10521	5	0	0	0	0	0	0
A930005H10Rik	1	0	0	0	0	0	0
B230206L02Rik	0	0	0	0	2	2	0
Tomm40	0	4	0	0	8	1	0
Ormdl2	0	0	0	0	9	0	0
Efnb3	0	5	0	0	8	4	0
Yars	0	0	0	0	1	6	0
Gm16751	9	0	0	0	0	0	0
Col20a1	0	0	0	0	3	0	0
Rpl23	0	0	0	0	17	9	0
Atrn	0	0	0	0	6	0	0
Lin7b	0	0	0	0	8	5	0
Taf5	0	2	0	0	7	1	0
Dalrd3	0	0	0	0	1	6	0
1110014N23Rik	0	0	0	0	9	6	0
Abca17	0	0	0	0	1	0	0
Urm1	0	0	0	0	2	1	4
Rasgef1b	0	0	0	0	0	1	0
Dgkz	0	0	0	0	20	0	0
Il28ra	2	0	0	0	0	0	1
Pi4kb	0	0	0	0	0	0	8
Gpsm2	0	0	0	0	0	1	7
Ttc7	0	0	0	0	18	0	0
Wrap53	0	5	0	0	5	3	0
Slc35f3	0	0	0	0	1	0	0
Ube2n	0	0	0	0	13	0	0
Rnf26	0	0	0	0	1	6	0
Cklf	0	0	0	0	2	0	0
Xrcc6	3	0	0	0	8	5	0
Sap30bp	0	0	0	0	4	4	0
Zbtb7a	0	0	0	0	21	18	0
Slc38a6	2	0	0	0	6	0	0
Hint2	0	0	0	0	3	0	0
Nicn1	0	0	0	0	1	10	2
Mapk1ip1l	0	0	2	0	0	0	0
Ghsr	0	0	1	0	0	0	0
Nrtn	0	0	0	0	11	1	2
Hvcn1	8	0	0	0	0	0	3
Gm11637	0	0	0	0	1	0	0
BC006965	0	0	0	0	1	0	0
4933415F23Rik	2	5	0	0	0	0	0
Sf3b3	3	0	0	0	6	0	0
Gm11619	0	0	0	0	4	1	0
Fmo2	1	0	0	0	0	0	0
Ablim2	0	0	0	0	5	4	0
Alg6	0	0	0	0	2	0	0
Olfr11	0	1	0	0	0	0	0
Zkscan3	0	23	0	0	0	0	0
Snx9	0	0	0	0	13	12	0
Slc13a1	0	2	0	0	0	0	0
Gm9385	9	0	0	0	5	0	0
Repin1	1	0	1	0	0	0	0
Nppb	0	0	0	0	0	7	0
Dnase1l2	0	0	0	0	13	9	3
Mrpl14	0	0	0	0	18	1	0
Atp6v1c1	2	0	9	0	9	0	0
Gm17201	0	0	0	0	8	0	0
Gins3	0	0	0	0	15	0	6
Rufy2	0	0	2	0	0	0	0
Aspn	0	0	0	0	0	0	5
2410133F24Rik	0	0	0	0	2	0	0
Gm16312	0	0	0	0	1	0	0
Gm12267	0	0	0	0	1	0	0
Hmbox1	0	0	0	0	0	2	0
Sectm1b	0	0	0	0	2	0	0
Ap1m2	0	0	0	0	5	0	0
Arfgap1	0	0	0	0	4	1	0
Gng8	0	0	0	0	2	3	0
Gm14510	0	0	0	0	0	0	1
Fam83a	0	0	0	0	1	2	0
Hbxip	0	0	0	0	13	0	0
Zic2	0	0	0	0	0	1	0
Gm15570	1	0	0	0	0	0	0
Gm11510	0	0	0	0	11	0	0
Spsb3	0	0	0	0	4	0	0
Cacna1g	0	0	0	0	17	1	0
Mei1	1	0	0	0	1	0	0
Gm15880	0	0	0	0	0	0	4
Zmynd11	0	0	1	0	0	0	0
Nfs1	0	0	0	0	5	0	0
Ehmt2	0	0	0	0	5	7	0
Gm15459	0	0	0	0	1	0	0
Mfrp	0	0	0	0	0	2	0
Olig1	0	0	0	0	3	0	0
Sox13	0	0	0	0	11	0	6
Slc6a5	2	0	0	0	0	0	0
Wdyhv1	0	0	0	0	0	3	0
Wbp2	0	0	0	0	12	7	0
Gm13061	0	0	0	0	0	3	0
AB124611	0	0	0	0	5	0	0
Gm17083	0	10	0	0	0	0	3
Ssu72	0	0	0	0	2	6	0
Ppp3ca	9	0	0	0	0	0	0
Sh3tc1	0	0	0	0	9	4	0
Slc35e2	0	0	0	0	1	6	0
Nat14	0	0	0	0	9	0	0
Gps2	0	10	0	0	18	3	0
Plcg1	25	0	0	0	0	0	0
Serac1	0	0	0	0	9	10	0
Celf3	0	0	0	0	0	0	1
Bri3bp	0	0	0	0	22	0	0
Fastkd2	0	0	0	0	0	6	0
Gm13024	0	0	0	0	0	2	0
Srrm2	0	0	0	0	0	0	2
Gm13642	3	0	0	0	0	0	0
Il17rc	0	0	0	0	1	0	0
Ncl	0	0	0	0	0	0	2
Obox6	0	0	0	0	1	0	0
Rnf6	0	0	6	0	0	0	0
Setd3	0	0	0	0	9	0	0
Zbtb32	0	0	0	0	0	4	0
Chtf18	0	0	0	0	6	2	0
5430411K18Rik	0	0	0	0	8	0	0
Amdhd1	2	0	0	0	0	0	0
Defb25	0	0	0	0	0	1	0
Msra	0	0	0	0	0	4	0
Clint1	1	0	0	0	1	0	0
Nfkbie	0	0	0	0	11	0	0
Cul9	0	0	0	0	13	0	3
Wapal	0	0	0	0	0	2	0
Cyth3	0	0	0	0	0	2	0
Vmn1r76	0	0	0	0	0	1	0
Itgax	0	0	0	0	0	1	0
Tmem232	0	0	3	0	0	0	0
Gm16166	3	0	0	0	0	0	0
Gm16168	1	0	0	0	0	0	0
1700008P20Rik	0	0	0	0	4	0	0
Ap4m1	0	0	0	0	3	0	0
BC005764	0	0	0	0	33	15	0
Mir702	0	0	0	0	0	2	0
Med20	0	0	0	0	14	0	5
Gm13113	0	0	0	0	0	0	1
Tfcp2	0	0	0	0	3	6	0
Rps10	0	0	0	0	8	18	0
2010300F17Rik	0	0	0	0	0	3	0
4931408A02Rik	0	0	0	0	3	0	0
Gm16144	0	4	0	0	7	0	0
Gm11582	0	0	1	0	0	0	0
Chchd10	0	0	0	0	1	0	13
Pan2	0	0	0	0	9	0	0
Cdc20	0	0	0	0	38	0	0
9530034E10Rik	0	0	0	0	1	0	0
Rab11b	0	0	0	0	3	2	2
Snora64	0	0	0	0	10	10	2
Rell1	0	0	0	0	0	1	0
Gm7598	1	0	0	0	0	0	0
Gm11513	0	0	0	0	0	5	0
Gm11741	0	0	0	0	13	5	0
Rdbp	0	0	0	0	5	7	0
Kcnk16	1	0	0	0	0	0	0
Setd4	0	0	0	0	6	0	3
Stom	0	0	0	0	49	0	0
Gm14168	0	0	0	0	2	0	0
Psmd3	0	0	0	0	3	6	0
Vps54	0	1	0	0	0	0	0
Hadha	0	0	0	0	8	1	0
Fam86	0	0	0	0	4	0	0
Pgm2	0	0	4	0	3	0	0
Slc22a13b	0	0	0	0	3	0	0
Gm14492	0	0	0	0	1	0	0
Srsf2	0	0	0	0	21	8	0
Arf1	0	0	0	0	0	1	0
Nxph3	0	0	0	0	3	0	0
Nacc1	0	0	0	0	0	9	0
1500009L16Rik	0	0	0	0	3	0	0
Nfya	0	0	0	0	0	0	1
Psmc3ip	0	0	0	0	5	2	0
Rbm7	55	0	0	0	0	0	0
Golm1	0	0	0	0	3	0	0
Gm12991	0	0	0	0	0	1	0
Ccdc134	6	0	0	0	4	4	0
Gm14963	0	0	0	0	4	0	0
Ddi2	0	0	0	0	8	2	6
Gsto2	0	0	0	0	0	0	3
Gli1	0	0	0	0	8	0	0
Whrn	0	0	4	0	8	0	0
AC122119.1	0	0	0	0	0	1	0
Gm10608	0	0	0	0	0	1	0
Traj3	0	0	0	0	0	1	0
Ceacam19	0	5	0	0	3	0	0
Aacs	0	0	0	0	25	2	0
4933404O12Rik	0	0	0	0	2	3	0
Hadhb	0	0	0	0	8	1	0
Gm15454	0	0	0	0	0	1	0
Hcst	0	0	0	0	0	2	0
Rnf128	0	0	1	0	0	0	0
Gnaz	0	0	0	0	7	0	0
Tm4sf4	1	0	0	0	0	0	0
Fbxo46	0	0	0	0	3	2	12
Ube2h	0	0	0	0	1	0	0
Tyrobp	0	0	0	0	0	1	0
Cacna1s	0	0	0	0	5	3	0
Tnfrsf14	0	0	0	0	19	0	6
Dip2c	0	0	1	0	0	0	0
Gm12112	0	0	0	0	0	1	0
Cpeb4	0	0	0	0	6	0	0
Gm10653	0	0	0	0	2	2	0
Frs3	0	0	0	0	10	0	4
Tbl2	0	0	0	0	8	0	0
Ncf4	0	0	0	0	5	0	4
Gm15969	0	0	0	0	0	1	0
Ctbp1	0	0	0	0	7	2	0
Gm17219	2	0	0	0	0	0	0
4930422G04Rik	0	0	2	0	0	0	0
Gm13673	1	0	0	0	0	0	0
Cdc42bpg	0	0	0	0	9	4	0
Fam163b	0	0	0	0	7	2	0
Dedd2	0	0	0	0	2	0	0
Gm13674	0	0	1	0	0	0	0
4933422H20Rik	0	0	0	0	1	0	0
Bin3	0	0	0	0	2	0	0
Xrcc5	0	0	0	0	3	0	0
Gm13201	0	0	0	0	0	2	0
Xrn1	0	0	0	0	3	0	0
Slc11a1	1	0	0	0	0	0	13
Fam134b	0	0	0	0	3	0	0
Ldb3	0	0	0	0	0	3	0
Gm16724	2	0	0	0	0	0	0
4930407G08Rik	0	1	0	0	1	0	0
Izumo4	0	0	0	0	37	13	1
Susd1	0	8	0	0	0	0	0
Gm17487	0	0	0	0	0	1	0
Cdyl	10	0	0	0	0	0	0
Pmf1	0	0	0	0	2	3	0
Crhr1	0	0	0	0	1	0	0
Cpsf1	0	0	0	0	12	28	0
Mesp2	0	0	0	0	6	0	0
Vmn1r4	0	0	0	0	1	0	0
Pgm2l1	2	0	0	0	0	0	0
Cyp2d22	4	0	0	0	0	0	0
Lpar5	0	0	0	0	6	0	0
Prdx2	0	0	0	0	0	9	0
Slc30a6	0	0	0	0	2	0	0
Cdh23	0	0	0	0	1	0	0
Ppp1r32	0	0	0	0	3	0	4
Tcp10c	0	0	0	0	3	1	1
Foxb1	0	0	0	0	3	0	0
Ccdc40	0	0	0	0	8	4	0
Mrgprd	0	0	0	0	0	1	0
Plcd4	1	0	1	0	0	0	0
9930012K11Rik	0	0	0	0	4	0	0
Slc22a23	0	5	3	0	0	0	5
BC013712	0	0	6	0	7	0	0
Man1c1	0	0	0	0	0	2	0
Mfsd7b	0	0	0	0	2	2	0
Socs4	0	0	1	0	0	0	0
Krtap5	0	0	0	0	4	0	1
5730559C18Rik	0	0	0	0	4	3	0
Tuba1b	0	0	0	0	0	5	0
Gm11551	0	0	0	0	4	0	0
Tmem92	0	0	0	0	0	2	0
Dgcr6	0	0	0	0	10	0	3
Ctrl	0	0	0	0	0	3	0
Mreg	0	0	0	0	5	0	0
Gm7325	0	0	0	0	2	0	0
Card10	0	0	0	0	5	4	17
Ap2m1	0	0	0	0	36	0	0
Sdsl	0	0	0	0	4	1	0
Atxn10	0	0	0	0	2	0	0
Mpzl2	6	0	0	0	2	0	0
Cep192	0	0	9	0	0	0	0
Gm16510	1	0	0	0	0	0	0
Gm19898	0	0	0	0	1	1	0
Mir1943	0	0	0	0	0	2	0
Camk2b	0	0	0	0	0	0	17
Rhbdd3	0	0	0	0	4	1	0
Gm16794	0	0	0	0	1	0	0
2810459M11Rik	0	0	0	0	0	0	11
Lysmd4	0	0	1	0	3	0	0
Casp8ap2	0	0	0	0	1	0	0
Chchd6	7	0	0	0	0	0	0
Olig2	0	0	0	0	1	0	0
Tex2	0	0	0	0	4	0	0
Ninj1	0	0	0	0	0	0	3
Klhdc1	0	0	0	0	6	0	0
Gm11792	0	0	0	0	7	0	0
Lrp3	0	0	0	0	8	0	0
Slc9a3r2	0	0	0	0	16	10	2
Pdlim2	0	0	0	0	5	0	0
Mif4gd	0	0	0	0	7	2	0
Opa1	0	0	0	0	2	0	0
Tmem8	0	0	0	0	1	3	0
Gm12902	5	0	0	0	0	0	0
Cep110	0	0	0	0	7	0	0
Brsk2	0	0	0	0	10	5	3
Gm6483	0	0	0	0	0	12	0
Foxn3	0	0	0	0	1	1	0
Eif3i	0	0	0	0	2	2	0
Ftsj3	0	0	0	0	0	0	2
Lime1	0	0	0	0	4	0	0
U2af2	0	0	0	0	8	7	0
Cks1b	0	0	0	0	3	4	0
Mast3	0	0	0	0	32	0	0
Rims1	0	5	0	0	0	0	0
Acap3	0	0	0	0	1	6	0
Psd2	0	0	0	0	0	1	0
U6atac	2	0	0	0	6	5	0
Gm17178	0	0	0	0	5	0	0
Sema3c	4	0	3	0	1	0	0
Dhodh	3	0	0	0	0	0	0
Eif1	0	0	1	0	3	2	0
Gm11642	0	0	0	0	2	0	0
Rxra	0	0	0	0	11	1	0
Ddit3	0	0	0	0	5	0	0
Cpt2	0	4	1	0	6	6	0
Fbxl17	1	0	0	0	0	0	0
Nacad	0	0	0	0	0	2	0
Zscan18	1	0	0	0	0	0	0
Os9	0	0	0	0	9	0	0
Alpl	0	0	0	0	0	5	0
Nme4	0	0	0	0	2	2	0
Trim29	0	0	0	0	0	1	0
Rdh11	2	0	0	0	0	0	0
Gm9985	0	0	0	0	1	0	6
Cd84	8	0	0	0	1	0	0
Tspan9	0	0	0	0	0	10	0
Slc16a11	0	1	0	0	5	1	0
Catsper3	0	0	0	0	0	0	1
Gm5634	0	0	0	0	0	0	1
Ptges	0	0	0	0	3	2	0
Gm13054	0	0	0	0	0	4	0
9230111E07Rik	0	0	0	0	1	0	0
Ror1	0	0	0	0	1	0	0
Rtel1	0	0	0	0	4	0	0
Rhbdl1	0	0	0	0	4	2	0
Gm15782	1	0	0	0	0	0	0
Cyb5rl	0	0	0	0	18	0	0
Nbl1	0	0	0	0	8	11	0
Gm962	0	0	0	0	4	0	0
Pofut1	0	0	0	0	25	2	0
Igfbp4	0	0	0	0	16	2	0
Arid1a	0	0	0	0	0	12	0
Zyg11a	0	3	1	0	0	1	0
Mir7	0	0	0	0	0	1	0
Mir1954	0	0	0	0	1	0	0
Trp53inp1	0	0	0	0	6	0	0
Ftsj1	0	0	0	0	0	0	3
Zfp330	3	0	0	0	0	0	0
9430008C03Rik	0	0	0	0	1	2	0
Snora20	0	1	0	0	0	0	0
Slc9a6	3	0	0	0	0	0	0
Capn10	0	0	0	0	5	0	0
Rabac1	0	0	0	0	2	0	0
2310015A10Rik	0	0	0	0	4	1	0
Trac	0	0	0	0	0	2	0
Zfp296	0	3	0	0	8	1	0
Gm17559	0	0	0	0	0	2	0
Kremen2	0	0	0	0	0	0	1
Fam113a	0	0	0	0	1	0	0
Ankrd28	2	0	0	0	0	0	0
H2afj	4	0	0	0	0	0	0
Gm12111	0	0	0	0	0	1	0
snoU83B	0	0	0	0	2	1	0
Adrm1	0	0	0	0	3	1	0
Pex3	2	0	0	0	0	0	0
Tmem63c	0	0	0	0	4	0	0
2310037I24Rik	0	0	0	0	0	5	0
Eif4e2	0	0	0	0	5	0	0
Bet1l	0	0	0	0	9	0	0
D630045J12Rik	3	0	0	0	0	0	0
Gm5617	58	0	0	0	0	0	0
Ctgf	0	0	1	0	0	0	0
Fabp5	0	0	0	0	7	0	0
Gm15461	0	0	0	0	1	0	0
Ap1g2	0	0	0	0	0	1	0
Scarna10	0	0	0	0	2	0	0
9130221H12Rik	0	0	0	0	1	0	0
Lama5	0	0	0	0	2	1	0
Slc4a2	0	0	0	0	0	19	0
Ggct	0	0	0	0	11	0	0
Defb48	0	0	0	0	1	0	0
Ephx2	0	0	0	0	1	2	3
Ccdc147	0	0	0	0	0	0	2
Paqr6	0	0	0	0	2	3	0
Gm11742	0	0	0	0	5	5	0
Pigm	0	0	0	0	22	2	0
Prrc2c	2	0	0	0	0	0	0
Dnajc14	0	0	0	0	1	0	0
Gcnt4	0	0	0	0	7	0	0
Gpr62	0	0	0	0	15	10	0
Ifitm3	0	0	0	0	12	0	0
1600029O15Rik	0	0	0	0	0	1	0
Eny2	0	0	7	0	0	0	0
Gm10840	0	0	0	0	0	0	1
Abca4	0	0	0	0	10	0	0
A630014C17Rik	0	0	0	0	1	0	0
Gm2574	0	0	1	0	0	0	0
Kpna2	0	0	0	0	4	0	0
Pptc7	9	0	0	0	0	0	7
Sh3bp2	0	0	0	0	1	0	0
Gm14427	3	0	0	0	0	0	0
Rhoq	0	0	0	0	2	0	0
Mcam	0	0	0	0	2	6	0
Nbeal2	0	0	0	0	7	0	0
B630019A10Rik	0	0	0	0	1	0	0
Unc13d	0	0	0	0	9	6	0
Ighe	0	0	0	0	2	1	0
Mapk8ip1	0	0	0	0	5	3	0
Pgam2	0	0	0	0	0	0	7
Gltscr2	0	0	0	0	2	4	0
Cecr5	0	0	10	0	0	0	0
Neurod2	0	0	0	0	0	6	0
Snx29	0	0	1	0	14	0	0
Lonrf2	0	0	0	0	3	0	0
Gm12746	0	0	0	0	2	0	0
Gm11395	0	0	0	0	0	0	1
Ctsk	0	0	0	0	0	3	0
Wasf2	0	0	12	0	29	0	0
1700001C19Rik	0	0	0	0	8	0	0
Sbf2	5	0	0	0	2	0	0
Gadd45g	0	0	0	0	34	0	2
Pycr1	0	0	0	0	14	2	0
Tmem93	1	0	0	0	2	0	0
Bglap2	0	0	0	0	0	2	0
Cyp4f14	0	0	0	0	0	0	2
D930014E17Rik	0	0	0	0	0	5	0
2010109K11Rik	1	0	0	0	0	0	0
Hnrnph3	0	0	3	0	0	0	0
Gm20512	0	0	0	0	5	1	0
Sgsm2	0	0	0	0	0	3	0
Vps13c	0	0	0	0	4	0	0
Slc30a4	0	0	2	0	0	0	0
Rbpjl	0	0	0	0	1	0	0
Fam169a	0	0	0	0	10	0	0
1810055G02Rik	0	0	0	0	1	0	0
S1pr5	0	0	0	0	3	0	0
Ezh1	0	0	0	0	6	1	0
Cdcp2	0	0	0	0	1	0	0
Mir342	0	0	0	0	2	0	0
1700001F09Rik	0	0	0	0	0	1	0
Ppp1r3c	3	0	0	0	0	0	0
Acsbg2	0	0	0	0	1	0	3
Gm2420	0	0	0	0	2	0	0
Tacc2	1	0	0	0	0	0	0
Snrpd3	0	0	0	0	2	0	9
Cep76	0	0	0	0	1	0	0
Rbm5	0	0	0	0	7	9	25
Grhl3	0	0	0	0	0	0	1
9330154K18Rik	0	0	0	0	3	0	0
Gm12337	0	0	0	0	1	0	0
Mrpl53	1	0	0	0	0	0	0
Slc30a10	0	0	0	0	4	0	0
Gm15525	0	0	0	0	2	5	0
Gtf3c2	0	0	0	0	13	0	0
Gtsf1l	0	0	0	0	1	0	0
Lhfp	3	0	0	0	0	0	0
Atp8a1	17	0	0	0	0	0	0
Tmem132a	7	0	0	0	3	0	11
Fktn	0	0	0	0	0	1	0
Prkce	0	0	3	0	0	0	0
Cdadc1	66	0	0	0	0	0	0
Gamt	0	0	0	0	34	11	3
Tmem110	0	0	0	0	6	0	0
Zfp266	0	0	0	0	4	0	0
Nthl1	0	0	0	0	18	10	3
Atp6v1g2	0	0	0	0	3	0	0
Gm12504	0	0	0	0	1	0	0
Ip6k3	0	0	0	0	0	3	0
Pmvk	0	0	0	0	3	4	0
Gm16861	0	0	0	0	7	0	3
Ftsjd2	0	0	0	0	1	11	0
1700110K17Rik	0	0	0	0	0	1	0
Ndufaf2	0	1	0	0	0	0	0
Atp6v0c	0	0	0	0	14	10	3
Car5a	0	0	0	0	6	4	0
Tmem91	0	0	0	0	4	0	0
Specc1l	0	0	0	0	8	0	3
Txn1	1	0	0	0	0	0	0
Ndufb2	0	0	1	0	0	0	0
Carkd	0	0	0	0	2	0	0
Gm16576	0	0	0	0	2	5	0
2310067B10Rik	0	0	0	0	9	4	0
Ino80	0	0	0	0	3	2	9
Rpl3l	0	0	0	0	7	3	2
P2rx7	2	0	0	0	2	0	5
C920021L13Rik	0	0	0	0	0	8	0
Tex19.2	0	0	0	0	3	1	0
Ccdc61	0	0	0	0	0	2	13
Gm14270	1	0	10	0	0	0	0
Gm6166	0	0	0	0	6	3	4
Stim2	0	0	0	0	1	0	0
Icam5	0	0	0	0	3	0	0
AL935177.1	0	0	0	0	2	0	0
Pxmp4	0	0	0	0	1	0	0
Gpr153	0	0	0	0	28	3	0
Pwwp2b	0	0	0	0	9	0	0
Smchd1	0	0	1	0	0	0	0
Dnajb6	0	0	0	0	2	1	0
Tef	1	0	0	0	10	5	0
Dhx16	0	0	0	0	2	10	0
Fam196a	2	0	0	0	0	0	0
Prkar1b	0	0	0	0	12	0	0
Ebna1bp2	0	0	0	0	30	0	0
Pcgf6	0	3	0	0	4	1	0
Col18a1	0	0	0	0	7	0	0
AI467606	0	0	0	0	2	0	0
snoU6	0	4	0	0	4	2	0
Gm12390	1	0	0	0	1	3	0
Ube2f	0	0	0	0	2	0	0
Gjb4	0	0	0	0	2	1	0
4933433P14Rik	0	0	0	0	0	11	0
Atp1a3	0	0	0	0	4	0	0
Emp2	0	0	0	0	3	0	0
Gm17541	1	0	0	0	0	0	0
Trem1	0	0	0	0	0	0	2
Dyrk1a	0	0	0	0	7	0	0
2200002D01Rik	0	0	0	0	0	0	9
Btd	1	0	0	0	0	0	0
Loxl3	2	0	0	0	0	0	0
Ptchd2	0	0	0	0	0	7	0
Bin2	0	0	0	0	1	0	0
Slc39a11	0	0	0	0	1	0	0
Cnot3	0	0	0	0	2	0	0
Gm17461	0	0	3	0	0	0	0
Clec2h	2	0	0	0	0	0	0
Bhlha9	0	0	0	0	0	1	0
Gtf3a	0	0	0	0	1	0	0
Wdr43	0	0	1	0	0	0	0
Prrt1	0	0	0	0	2	6	0
Gm5912	0	0	0	0	1	0	0
Taf6	0	0	0	0	3	0	0
Dctn3	3	0	0	0	0	0	0
Gm17690	0	0	0	0	0	5	0
C230037L18Rik	0	0	0	0	0	3	0
Itfg3	0	0	0	0	1	3	0
Gdf15	0	0	0	0	22	0	0
Eif2d	0	0	0	0	3	0	0
Rbm15b	0	0	0	0	12	6	0
Cox6b1	0	0	0	0	0	5	0
Zbtb17	0	0	0	0	10	2	9
Tmem57	0	0	0	0	0	3	0
Grhl2	0	0	0	0	4	0	0
Med1	0	0	0	0	1	11	0
Gm16523	0	0	0	0	1	0	0
Katnb1	0	0	0	0	7	12	7
Gm17428	0	0	0	0	0	1	0
Zfp598	0	0	0	0	15	10	2
Gm15587	0	0	0	0	0	4	0
AC152058.1	0	0	0	0	0	1	0
Gm17383	0	0	0	0	2	0	0
Pds5b	2	0	0	0	0	0	0
Gm17408	2	0	0	0	0	0	0
Xpo1	0	0	0	0	0	2	0
Asgr2	0	2	0	0	6	0	0
Rsph9	0	0	0	0	17	1	0
Slc46a1	0	0	0	0	2	0	0
Rbm12	0	0	0	0	3	0	0
Mir5133	0	0	0	0	0	1	0
Gm15612	0	0	0	0	1	0	0
Il10rb	0	0	0	0	5	0	0
Gm4981	0	0	0	0	0	16	0
Gm13228	0	0	0	0	0	3	0
4933426D04Rik	0	0	0	0	0	1	0
Gpr112	1	0	0	0	0	0	0
Gm2423	0	0	0	0	2	0	0
Scamp2	0	0	0	0	7	5	8
2310001K24Rik	0	0	1	0	2	0	0
Ubl5	0	0	0	0	9	0	0
SCARNA20	0	0	0	0	3	0	0
Speg	0	0	0	0	0	11	5
1110008L16Rik	6	0	3	0	0	0	0
Tmem201	0	0	0	0	13	8	0
Arfgap3	0	0	0	0	0	15	0
Xpnpep3	0	0	0	0	1	0	0
Spire2	0	0	0	0	3	0	0
Iqcf1	0	0	0	0	1	4	0
Setd2	0	0	0	0	17	0	0
Ccdc56	0	0	0	0	6	2	0
Eif5a	0	6	0	0	17	5	0
Otud3	0	0	0	0	5	10	0
Mybbp1a	1	0	0	0	0	0	0
Tlk1	3	0	0	0	0	0	0
Prm3	0	0	1	0	4	0	0
Clec14a	0	1	0	0	0	0	0
BC021891	0	0	0	0	1	0	0
Cox8a	0	0	0	0	25	23	4
Clcc1	0	0	0	0	1	3	8
Prpf6	0	0	0	0	3	0	0
Fignl1	80	0	0	0	0	0	0
Gm5682	0	0	0	0	2	0	0
Map3k1	0	2	0	0	0	0	0
Gm11540	0	0	0	0	1	0	0
Col8a2	0	0	0	0	10	0	0
Gm11991	0	0	0	0	2	0	0
Tnfrsf13c	4	0	0	0	2	0	0
Pag1	0	0	0	0	1	0	0
Npepps	0	0	0	0	12	18	0
L3mbtl2	0	0	0	0	6	4	0
Mblac1	0	0	0	0	4	0	0
1700021K19Rik	1	0	0	0	0	0	0
AI846148	0	0	0	0	14	5	3
Grin2d	0	0	0	0	18	0	0
Cps1	0	0	0	0	0	0	1
Cyth2	0	0	0	0	29	0	0
Ift20	0	0	0	0	2	0	0
4831426I19Rik	0	0	0	0	0	1	0
Dpep1	0	0	0	0	1	0	0
G3bp1	0	0	0	0	0	8	0
2010320O07Rik	0	0	0	0	0	6	0
Rnf149	0	0	0	0	1	0	1
Rad9	0	0	0	0	3	3	0
Akap9	0	0	0	0	1	0	0
Sc5d	0	0	0	0	3	0	0
Rnf212	0	0	0	0	0	2	2
4930405A21Rik	0	0	0	0	3	0	0
Gm5518	0	0	2	0	0	0	0
Zer1	0	0	0	0	11	2	6
E2f6	8	0	0	0	0	0	0
Cdk7	1	0	0	0	0	0	0
Gfra2	0	0	0	0	2	0	0
Src	0	0	0	0	9	0	6
Aldh3b1	0	0	0	0	2	0	0
Fam89a	0	0	0	0	2	0	0
Lpar6	0	0	0	0	0	2	0
Cenpp	0	0	0	0	0	0	4
Pcna	0	0	0	0	3	0	0
Ugcg	0	11	0	0	0	0	0
Hist1h1c	0	0	2	0	0	0	0
Cbfb	0	0	0	0	9	14	0
Rhoa	0	0	0	0	3	10	2
Arpc1b	2	0	0	0	0	0	0
Insr	0	0	0	0	1	0	0
Kif3c	0	2	6	0	0	0	0
Klc3	0	0	0	0	5	1	0
Tspan31	0	0	0	0	10	0	0
Gm13412	0	0	0	0	6	2	0
Pcbp3	0	0	0	0	1	0	0
B4galt2	0	0	0	0	2	0	0
Nosip	0	0	0	0	6	12	0
4930528F23Rik	0	0	0	0	4	0	0
Pex19	0	0	0	0	18	2	0
Myom3	3	0	0	0	1	0	0
Samhd1	0	0	0	0	4	0	4
Sdhb	0	0	0	0	13	0	1
Gm17518	0	0	0	0	2	0	0
Dtl	0	0	0	0	3	0	0
Pask	0	0	0	0	3	0	0
Nrbp2	0	0	0	0	4	25	0
1110054M08Rik	0	0	0	0	0	0	1
Fau	0	0	0	0	14	6	0
Rpl36al	0	0	0	0	14	0	0
Bcat2	0	0	0	0	18	4	0
Airn	0	2	0	0	0	0	0
Uimc1	0	0	0	0	0	1	0
Fadd	0	0	0	0	2	0	0
Lsm5	0	0	0	0	1	0	0
Dcaf10	0	0	0	0	1	0	0
Prok1	0	0	0	0	6	0	0
4933407C03Rik	0	0	0	0	2	0	0
G6pc	0	0	0	0	3	1	0
Cc2d1b	0	1	0	0	0	0	0
2610507I01Rik	0	0	0	0	0	1	0
Smg1	2	0	0	0	0	0	0
Khsrp	0	0	0	0	1	4	5
Klf1	0	0	0	0	0	6	0
Mta1	0	0	0	0	18	17	0
Dkkl1	0	0	0	0	8	8	0
Fam129c	1	0	0	0	0	0	2
Igf1r	0	0	1	0	0	0	0
AL645971.1	0	0	0	0	0	1	0
Gm12525	0	0	0	0	0	1	0
Pgrmc2	0	0	0	0	2	0	0
BC106179	0	0	0	0	16	0	0
Sirpa	6	0	0	0	7	0	0
Dnpep	0	0	2	0	0	13	7
Gm13019	0	0	0	0	1	2	0
Gm6222	0	0	1	0	0	0	0
Gm14316	0	0	0	0	3	0	0
Tmigd1	0	0	0	0	0	4	0
Hcrtr1	0	0	0	0	3	0	0
Ankrd11	0	0	0	0	3	0	0
Gm13777	0	0	0	0	14	4	0
Clip4	0	0	1	0	0	0	0
Akt1s1	0	0	0	0	2	11	0
Top3a	0	0	0	0	2	0	0
Cry2	0	0	0	0	1	3	0
Hoxb8	0	0	0	0	0	0	2
Mpnd	2	0	0	0	0	1	0
Grb7	0	0	0	0	0	6	0
Defb43	0	0	0	0	1	0	0
Pter	0	0	0	0	1	0	0
Ap2b1	0	0	0	0	1	1	0
Psmb10	0	0	0	0	4	4	0
Sart3	0	0	0	0	0	3	17
Parp3	0	0	0	0	16	14	0
Tcl1	0	0	0	0	0	2	0
Dgat1	0	0	0	0	13	38	0
9430097D07Rik	0	0	1	0	4	9	0
Tnip1	0	0	0	0	0	1	3
Tm6sf2	0	0	0	0	12	8	0
Gm14047	1	0	0	0	0	0	0
Ceacam3	0	0	0	0	1	0	0
Mdfi	0	0	0	0	4	0	5
Tceb2	0	0	0	0	0	0	2
Cyp4f13	0	0	0	0	0	0	2
Aco2	1	0	0	0	10	4	0
Fkrp	0	0	0	0	2	6	0
Mus81	0	0	0	0	1	0	0
Tor1aip2	0	0	0	0	1	0	0
Gpr110	0	0	0	0	4	0	0
Gm17670	0	0	0	0	2	0	0
Pex14	0	0	0	0	0	9	0
Dpy30	0	0	0	0	1	0	0
Btbd2	0	0	0	0	38	12	2
B4galt1	2	0	0	0	4	4	0
Gm4189	0	0	0	0	2	0	0
Dlx3	0	0	0	0	1	4	0
Inhbe	0	0	0	0	3	0	0
Sesn1	0	0	0	0	0	6	0
Dus3l	0	0	0	0	16	7	7
Zdhhc12	0	0	0	0	9	2	5
Cry1	0	0	0	0	9	0	0
Pgm1	0	0	0	0	0	1	0
Fam25c	0	0	0	0	0	1	0
Rab10	0	0	5	0	0	0	0
Ogg1	0	0	0	0	2	0	0
2700068H02Rik	0	0	0	0	1	0	0
Aldh16a1	0	0	0	0	11	11	0
Taf5l	0	0	0	0	4	5	0
Sucla2	0	0	0	0	0	2	0
Spsb2	0	0	0	0	10	0	0
Preb	0	0	0	0	16	1	0
Rassf8	0	0	0	0	4	0	2
Mea1	0	0	0	0	13	0	3
Snord35a	0	0	0	0	3	4	0
Lix1l	0	0	0	0	2	0	0
4930520O04Rik	1	0	0	0	0	4	0
Gm12571	0	0	0	0	2	0	0
Nsun2	0	0	0	0	6	0	0
Paics	0	0	0	0	0	0	3
Slc22a14	0	0	0	0	3	3	0
Gxylt2	1	0	0	0	3	0	0
Smad3	0	0	0	0	11	2	0
Nudt14	0	0	0	0	19	44	0
Acsm2	2	0	0	0	0	0	0
Gm20403	8	0	0	0	0	0	0
Gzmm	0	0	0	0	16	3	4
Gm15420	0	0	0	0	0	1	0
Hes1	0	0	0	0	4	0	0
Serpina3c	0	0	0	0	1	0	0
Ppp1r18	0	0	0	0	2	10	0
Gm13548	2	0	0	0	0	0	0
Ppp2r5b	0	0	0	0	11	5	0
Mrpl55	0	0	0	0	0	1	0
Fbxw2	0	0	0	0	2	0	0
Garnl3	0	0	0	0	3	1	0
Kbtbd13	0	0	0	0	0	0	2
Gm8225	0	0	0	0	4	1	0
Iqsec1	1	0	0	0	6	0	4
Zcrb1	2	0	0	0	0	0	0
Fhad1	0	0	0	0	2	0	0
Mocs3	0	0	0	0	4	9	0
Rln1	0	0	1	0	0	0	0
Gm10805	0	0	0	0	12	0	0
2610528B01Rik	0	0	0	0	2	3	0
Dnajc21	0	0	1	0	0	0	0
AI481877	0	1	0	0	0	0	0
1700120B22Rik	1	0	0	0	0	0	0
Zfp811	0	0	0	0	0	0	1
Calml4	0	0	0	0	7	4	0
Atg7	0	0	0	0	8	6	5
Sbk2	0	0	0	0	3	0	0
Fabp12	0	0	0	0	1	0	0
Homez	0	0	0	0	0	1	0
Ost4	0	0	0	0	17	1	0
2510039O18Rik	0	0	0	0	0	18	0
Plcd1	0	0	0	0	18	6	0
Irak1bp1	1	0	1	0	0	0	0
B230216G23Rik	2	0	0	0	0	0	0
SNORA7	0	0	0	0	1	0	1
Gata2	0	0	0	0	1	0	0
Ptpn23	0	0	0	0	16	0	0
Mettl11a	0	0	0	0	3	0	0
Slc23a2	0	0	0	0	1	0	0
Crtap	1	0	0	0	0	18	0
SCARNA21	0	2	0	0	2	0	0
Kdm2b	0	0	0	0	4	0	0
Rybp	0	0	0	0	11	0	0
Meis3	0	0	0	0	0	4	0
5830403L16Rik	1	0	0	0	0	0	0
Stx5a	0	0	0	0	2	0	0
Coq5	0	0	0	0	1	0	0
Gm17619	0	0	1	0	0	0	0
Dnajc8	0	0	0	0	2	0	0
Aatk	0	0	0	0	15	12	0
Sigirr	0	0	0	0	7	3	0
Pyhin1	2	0	0	0	0	0	0
Gm18284	0	0	0	0	6	5	0
Mxra7	0	0	0	0	11	8	0
Gm12599	3	0	0	0	0	0	0
Ncr3	0	0	0	0	3	0	0
Klrg2	0	0	0	0	0	0	3
Bloc1s1	0	0	0	0	5	0	0
Gm4392	0	0	1	0	0	0	0
Gm15069	0	1	1	0	0	0	0
Gm16142	1	0	0	0	0	0	0
Lpin3	23	0	0	0	0	0	0
Trpv1	0	0	0	0	1	0	0
Papolb	0	0	0	0	3	4	0
Arih2	0	0	0	0	1	4	0
Mmp9	0	0	0	0	2	4	0
Gm10032	0	0	0	0	6	0	0
Cd300lh	0	0	0	0	2	0	0
Cdk5rap1	0	0	0	0	2	0	0
Prmt5	0	0	0	0	0	2	0
2410019O14Rik	0	0	0	0	0	0	1
Ttyh3	0	0	0	0	0	6	0
Samd14	0	0	0	0	0	6	0
Wdfy3	9	0	0	0	0	0	0
SCARNA11	0	0	0	0	11	0	0
Dync1li2	0	0	0	0	2	0	0
Mapk1ip1	0	0	0	0	1	0	0
Cdk17	5	0	12	0	0	0	0
4930539E08Rik	0	0	0	0	0	4	0
Mtfmt	0	0	0	0	0	0	2
Zfp873	0	0	0	0	0	0	1
Kifc5b	0	0	0	0	8	7	0
Pld4	0	0	0	0	14	37	0
Spns2	1	0	0	0	0	0	0
Mep1a	0	0	0	0	3	0	1
Sardh	0	0	0	0	19	2	0
Trak2	0	0	0	0	2	0	0
Rpl7a	2	5	0	0	17	4	0
Akr1e1	1	0	0	0	0	0	0
Dstyk	5	0	0	0	7	4	0
4732418C07Rik	0	0	0	0	2	0	0
Fhod1	0	0	0	0	9	17	0
Atp6v0a2	0	0	0	0	8	1	2
Gm15979	0	0	0	0	0	2	0
4933403F05Rik	0	0	14	0	2	0	0
E130317F20Rik	0	0	0	0	27	3	4
Gm12795	0	3	0	0	0	0	0
Cfi	0	0	1	0	0	0	0
Naif1	0	0	1	0	8	16	0
SNORA42	0	0	0	0	1	2	0
Gm8325	0	2	2	0	0	0	0
Chaf1a	1	0	0	0	2	3	0
Nucb1	0	0	0	0	20	6	0
Abca7	0	0	0	0	34	19	1
Gm11503	0	0	0	0	1	0	0
Gm15851	0	0	0	0	1	0	0
Dhps	0	0	0	0	0	2	0
Anp32e	0	0	0	0	0	16	0
Sybu	0	0	5	0	0	0	0
Tfdp1	0	0	0	0	3	0	0
Pomt2	0	0	0	0	6	0	0
Adamts13	0	0	0	0	1	0	0
Gm15537	0	0	0	0	7	0	0
Gm16310	0	0	0	0	2	0	0
Xpc	4	0	0	0	0	0	0
Fasn	0	0	0	0	12	1	0
Ppp1r37	0	1	0	0	5	1	0
Zcchc14	0	0	0	0	3	2	0
Polr2c	0	0	0	0	0	12	0
Lrfn4	0	0	0	0	1	5	5
Pea15a	0	0	0	0	18	2	0
Gm20458	0	0	0	0	1	0	1
Gm20442	0	0	0	0	0	3	0
Tcam1	0	0	0	0	1	0	0
Gga3	0	0	0	0	9	3	0
Slc30a5	1	0	0	0	0	0	0
Loh12cr1	0	0	0	0	1	3	0
Gm16069	0	0	0	0	1	4	0
Stil	0	0	0	0	0	1	0
Apol7d	0	0	0	0	1	0	0
Rrp36	0	0	0	0	9	0	3
Mis18bp1	0	22	0	0	0	0	0
Rnf130	1	0	0	0	0	0	0
Lhx6	2	0	0	0	2	0	0
Lrrn2	0	0	0	0	6	0	0
C530028O21Rik	0	0	0	0	9	0	0
Gata5	0	0	0	0	2	0	0
D11Wsu99e	0	0	0	0	1	0	0
Gm12732	0	0	1	0	0	0	0
Cstf1	0	0	0	0	2	0	0
Gm20479	0	0	0	0	1	0	0
Blvrb	0	0	0	0	1	0	0
5031425F14Rik	0	0	0	0	0	1	0
Ikzf1	51	0	0	0	0	0	0
Spats1	0	0	0	0	4	0	0
Ociad1	2	0	0	0	6	0	0
Dlx2	1	0	0	0	0	0	0
Syt13	0	0	0	0	3	0	0
Fads6	0	0	0	0	3	4	0
Gm11198	0	0	0	0	4	0	0
Zap70	0	0	0	0	0	3	0
Snora36b	0	0	0	0	1	0	0
Actn2	0	0	1	0	0	0	0
Lonp1	0	0	0	0	18	13	7
Rin3	0	0	0	0	0	4	0
Kcna10	0	0	0	0	2	0	0
Cdh15	0	0	0	0	3	0	0
Gm15247	0	6	4	0	0	1	0
Crb3	0	0	0	0	1	0	0
Rab3il1	0	0	0	0	3	0	5
SNORA31	0	0	1	0	0	3	0
4833413E03Rik	0	0	0	0	1	0	0
Nat6	0	0	0	0	14	4	26
Tnfrsf12a	0	0	0	0	0	0	4
Lgals12	0	0	0	0	1	0	0
Gm16315	0	0	0	0	6	10	0
Gm10232	0	0	0	0	7	11	0
Rapgef1	0	0	0	0	1	0	0
Dync1i2	4	0	0	0	0	0	0
Muc4	1	0	0	0	0	0	0
Wnt1	0	0	0	0	0	5	0
Asb3	0	0	0	0	3	0	0
Olfr1342	0	0	0	0	3	0	0
Cldn13	0	0	0	0	2	0	0
Gng5	0	0	0	0	10	0	0
Fam131c	0	0	0	0	10	1	8
BC048609	0	0	0	0	8	3	0
Slc38a5	0	0	0	0	0	0	5
BC020535	0	0	0	0	2	3	0
Zxdc	0	0	0	0	0	0	3
Gm16151	1	0	0	0	0	0	0
Shisa5	0	0	0	0	0	3	0
Gm17357	0	0	0	0	3	6	0
Atp2b1	4	0	0	0	0	0	0
Slc5a11	0	0	0	0	3	0	0
Isoc2b	0	0	0	0	9	2	0
Sqrdl	0	0	1	0	0	0	0
Sorl1	0	0	0	0	4	0	0
Slc38a8	0	0	0	0	1	0	0
Gm12230	0	0	0	0	0	2	2
Cadm4	0	0	0	0	9	0	0
Dcst1	0	0	0	0	3	4	0
Pi16	0	0	0	0	0	23	0
Glra1	0	0	0	0	0	2	0
Pmpca	0	0	0	0	10	4	0
Hexa	2	0	0	0	0	0	0
Gm12238	0	0	0	0	0	1	0
AL672259.1	0	0	0	0	2	0	0
Spg20	0	0	2	0	0	0	0
5S	0	0	1	0	7	3	1
Anubl1	0	0	0	0	3	1	0
Med18	0	0	0	0	1	0	0
Cln3	0	0	0	0	2	0	0
Mterfd3	0	0	0	0	10	0	0
Pth1r	0	0	0	0	2	0	0
Gm336	3	0	0	0	0	0	0
Tnrc6a	0	0	0	0	3	0	0
Psors1c2	0	0	0	0	1	0	0
Acy1	0	0	0	0	17	12	0
Nsd1	0	0	0	0	0	1	0
Ccbp2	0	0	0	0	5	1	3
Zmat5	0	0	0	0	1	4	0
Dnajc25	0	8	0	0	0	0	0
9530056K15Rik	0	0	0	0	0	2	0
Atp2a3	1	0	0	0	2	0	0
Wnt6	2	0	2	0	0	0	0
Smyd4	0	0	0	0	1	0	0
Anxa6	0	0	0	0	0	6	3
Gm12906	0	1	0	0	2	1	0
Snx10	0	0	1	0	0	0	0
Tcp11l2	0	0	0	0	5	0	0
Mrpl24	0	0	0	0	10	2	0
Gm11977	0	0	0	0	0	1	0
Gm12034	0	0	5	0	10	0	0
Mir181a	0	0	0	0	1	0	0
Cyp11a1	0	0	0	0	0	2	0
Hmx1	0	0	0	0	0	1	0
Mir3102	0	0	0	0	1	1	0
Fndc3b	2	0	0	0	0	0	0
Nemf	0	0	0	0	16	0	0
Nrap	2	0	0	0	0	0	0
Dnahc17	0	0	0	0	3	4	0
Cdk2ap1	0	0	0	0	4	0	4
6030429G01Rik	0	0	0	0	2	14	0
4931409K22Rik	0	0	0	0	0	3	0
Pfkfb4	0	0	0	0	0	2	0
Ptprc	8	0	0	0	0	0	0
6330512M04Rik	0	0	0	0	4	3	0
Rftn2	0	0	0	0	1	0	0
Nrk	0	0	2	0	0	0	0
Gm16853	0	0	0	0	1	0	0
Iqgap3	0	0	0	0	9	2	0
Gm15334	0	0	0	0	1	0	0
1110007C09Rik	0	0	0	0	0	0	4
Hcfc1r1	0	0	0	0	0	0	3
Foxo1	13	0	0	0	1	0	0
0610007C21Rik	0	0	0	0	15	0	0
Wipf1	0	0	0	0	3	0	0
Clec10a	0	3	0	0	8	0	0
1700086P04Rik	0	0	0	0	0	2	0
Gm12307	0	2	0	0	0	3	0
Gm6640	0	0	1	0	0	0	0
9130020K20Rik	0	0	0	0	0	3	0
Znrf4	0	0	0	0	16	14	1
Usp21	1	0	0	0	2	6	0
Samd9l	0	0	7	0	0	0	0
Rbp4	1	0	0	0	0	0	0
Zc3h10	0	0	0	0	9	0	0
Upp1	0	0	0	0	1	3	0
Il12rb1	0	0	0	0	17	0	0
AI607873	2	0	0	0	0	0	0
Wdr24	0	0	0	0	1	1	0
Sphk2	0	0	0	0	30	2	0
Eml4	0	0	0	0	1	0	0
G430095P16Rik	0	0	0	0	0	6	0
Psmb3	0	0	0	0	15	9	0
Abi2	0	0	7	0	0	0	0
H3f3c	0	0	0	0	4	0	3
Rhot2	0	0	0	0	5	3	0
Ruvbl1	0	0	0	0	2	0	0
Tmem125	0	0	0	0	26	0	0
Slc6a1	0	0	0	0	0	20	9
Capn2	7	0	0	0	0	0	0
Gm18734	0	0	0	0	3	0	0
Gm17421	0	0	0	0	0	1	0
Coro2a	0	0	0	0	0	2	0
Dpysl5	0	0	0	0	3	1	0
4921517D21Rik	0	0	0	0	3	0	0
Chrm3	0	0	1	0	0	0	0
Rpp40	12	0	0	0	0	0	0
Gm10279	0	0	0	0	1	0	0
Cltc	0	0	0	0	0	3	0
Nudt18	0	0	0	0	11	0	0
Gm14232	0	0	0	0	4	0	0
Anxa2	0	11	0	0	19	0	0
Gm7873	0	0	0	0	8	0	0
Olfm2	0	0	0	0	6	0	0
Aox4	0	0	0	0	3	0	0
4930521A18Rik	1	0	0	0	0	0	0
Dbf4	0	0	0	0	8	0	0
Gpr157	0	0	0	0	9	3	0
Gm12236	0	0	0	0	0	1	0
Gm11114	1	0	0	0	0	0	0
Hist1h2bm	0	4	0	0	0	0	0
Cilp2	0	0	0	0	9	0	0
D14Ertd668e	52	0	0	0	0	0	0
1700013F07Rik	0	0	0	0	0	2	1
Gpr81	0	0	0	0	2	0	0
Fam35a	0	0	0	0	0	2	0
Mrps18b	0	0	0	0	3	11	0
Acd	0	0	0	0	10	10	0
Wwp1	1	0	0	0	0	0	0
Lztr1	0	0	0	0	2	0	1
Tyk2	0	0	0	0	5	0	0
Rpl37a	0	0	0	0	3	0	0
Cluap1	0	0	0	0	11	0	0
Gm11576	0	0	5	0	0	0	0
Ddn	0	0	0	0	0	3	0
Scn3b	0	0	0	0	0	2	0
Gdf11	0	0	0	0	1	0	0
B4galt3	1	0	0	0	2	6	0
Pusl1	0	0	0	0	1	6	0
Ncstn	0	0	0	0	11	2	0
Mfng	0	0	0	0	5	4	18
Asap3	0	0	0	0	5	4	0
A930011O12Rik	0	0	0	0	0	3	0
Sft2d3	0	0	0	0	0	1	0
Litaf	0	0	7	0	14	0	0
Phgdh	0	0	0	0	3	0	0
Swi5	0	0	1	0	4	12	0
Arpc3	8	0	0	0	3	0	7
Id1	0	0	0	0	0	3	0
1700001C02Rik	0	0	0	0	1	1	0
Ntsr2	5	0	0	0	0	0	0
Spef1	0	0	0	0	7	1	0
Rod1	0	8	0	0	0	0	0
Gm17387	0	0	0	0	5	0	0
Gm12352	0	0	0	0	0	2	0
Vipr1	0	0	0	0	3	1	3
Aftph	0	0	11	0	21	0	0
Rmnd5b	0	0	0	0	2	0	0
Rpl10a	0	0	0	0	8	0	23
Nphp4	0	0	0	0	14	2	0
Tnpo2	0	0	0	0	0	5	0
Iqcf5	0	0	0	0	7	4	0
A430105I19Rik	0	0	0	0	0	0	1
Polrmt	0	0	0	0	27	10	4
Npas4	0	0	0	0	0	2	6
Gm6493	0	0	0	0	1	0	0
Apol9b	0	0	0	0	8	0	0
Tnxb	0	0	0	0	2	3	0
Rnf169	4	0	0	0	0	0	0
Sh3pxd2b	0	0	0	0	5	0	0
Clptm1l	0	0	0	0	0	1	0
O3far1	3	0	0	0	0	0	0
Camsap3	0	0	0	0	1	0	0
Abcb4	0	0	0	0	2	0	0
Gm13776	0	0	0	0	6	0	0
Mapt	0	0	4	0	2	0	0
Tnfrsf18	0	0	0	0	1	6	0
Ifrd2	0	0	0	0	15	4	24
P2ry2	0	0	0	0	0	1	0
Slc30a7	1	0	0	0	0	0	0
Gm5146	0	0	0	0	0	0	1
4930570N19Rik	0	0	1	0	0	0	0
Nme1	0	0	0	0	10	6	0
Nuak2	3	0	0	0	5	4	0
A730056A06Rik	0	0	2	0	0	0	0
Stk30	0	0	0	0	3	0	0
Map3k10	0	0	0	0	1	0	0
Zfp941	0	0	0	0	6	0	0
Ciz1	0	0	1	0	7	15	0
Gpr35	0	0	0	0	3	0	0
Slc12a4	0	0	0	0	3	4	0
Orc6	0	0	0	0	2	0	0
Gm9159	0	0	4	0	0	0	0
Acot7	0	0	0	0	33	5	0
Ppox	0	0	0	0	2	6	0
Rit1	0	0	0	0	0	2	0
Gm17279	0	0	0	0	0	5	0
Hyi	0	0	0	0	36	0	0
Card9	0	0	0	0	6	4	0
Glud1	0	0	0	0	0	3	0
Itm2c	0	0	0	0	0	0	12
Hist2h3c2	0	0	0	0	0	6	0
Ncbp1	0	0	2	0	0	0	0
Tmem190	0	0	0	0	7	8	0
Gpr75	0	0	0	0	2	0	0
A130050O07Rik	1	0	0	0	0	0	0
Ms4a15	3	0	0	0	0	0	0
Ift172	0	0	0	0	14	0	0
Casc1	0	0	0	0	0	0	1
Slk	0	0	0	0	7	1	0
Ostc	1	0	0	0	0	0	0
C230096C10Rik	0	0	0	0	9	7	0
Vat1	0	0	0	0	10	3	0
Mllt1	0	0	0	0	3	3	7
Cyp4a32	0	0	0	0	1	0	0
Lgi3	0	0	0	0	6	0	0
Lrrc15	0	0	0	0	2	0	0
SNORA46	0	0	0	0	5	0	0
Kif14	0	0	0	0	5	3	0
Amdhd2	0	0	0	0	2	7	1
Rps3a	0	0	2	0	0	0	0
Gm4969	0	0	0	0	0	0	5
Amac1	0	10	0	0	10	3	0
Dip2b	0	0	0	0	3	0	0
Gm15441	0	0	0	0	2	0	0
B230323A14Rik	0	0	0	0	1	0	0
Nktr	0	0	0	0	8	1	8
2310079F23Rik	0	0	0	0	8	4	0
Zfp106	0	0	16	0	0	2	0
Prmt2	0	0	0	0	1	0	4
Casp7	2	0	0	0	0	0	0
Rps15a	2	0	0	0	1	1	13
Ccnd1	0	0	0	0	0	6	0
Dnm1	0	0	1	0	7	10	0
Nnmt	55	0	0	0	0	0	0
St6galnac6	0	0	1	0	3	19	0
2510046G10Rik	0	0	0	0	2	0	0
SNORA63	0	0	0	0	3	0	0
Gpr113	0	0	0	0	6	0	0
Adcy9	1	0	0	0	6	0	4
Csf1	0	0	0	0	15	0	0
C1qa	0	0	0	0	0	3	0
Cbx6	0	0	0	0	4	7	0
Selplg	0	0	0	0	0	2	17
AC120136.3	0	0	0	0	1	0	0
Nipsnap3b	0	0	9	0	0	1	0
Arf4	1	0	3	0	0	0	0
E230001N04Rik	0	0	0	0	0	0	2
Apeh	0	0	0	0	4	10	3
0610010K14Rik	0	3	0	0	8	0	0
Fgf15	0	0	0	0	0	2	0
Stx7	0	1	0	0	0	0	0
Cdhr5	0	0	0	0	1	1	0
Keap1	0	0	0	0	10	0	0
Mknk2	0	0	0	0	40	16	2
Vil1	0	0	1	0	0	0	2
Zfp109	0	0	0	0	7	0	0
Prx	0	0	0	0	1	0	0
Fen1	0	0	0	0	0	0	3
Armc3	1	0	0	0	0	0	0
Acer3	0	0	0	0	1	4	0
Dvl1	0	0	0	0	1	6	0
Gm12920	0	0	0	0	1	0	0
AC134576.1	0	0	0	0	0	1	0
Gm15047	1	0	0	0	0	0	0
Hist2h2be	0	0	0	0	0	5	0
4921504A21Rik	0	0	0	0	0	4	0
Ccar1	0	0	3	0	0	0	0
Cds2	0	0	0	0	2	0	0
Gm14268	0	0	0	0	1	0	0
Mab21l2	0	0	0	0	1	0	0
Psme4	0	0	0	0	8	0	0
Mtag2	0	0	0	0	3	3	0
0610007P22Rik	0	0	0	0	2	0	0
Tyms	0	0	0	0	6	0	0
Vmn1r80	0	0	0	0	0	1	0
Gm13207	0	0	0	0	0	18	0
0610031J06Rik	0	0	0	0	2	3	0
Slc35c2	0	0	0	0	5	0	0
Fubp3	0	0	0	0	4	12	0
Rab21	2	0	0	0	0	0	0
Dmrt3	0	0	0	0	3	0	0
Dvl2	0	7	0	0	14	2	0
Spnb1	1	0	0	0	0	0	0
Mpz	0	0	0	0	2	5	0
Efemp2	0	0	0	0	1	0	5
Gm12523	0	0	0	0	0	1	1
Bahd1	0	0	0	0	0	2	0
Slc25a24	0	0	0	0	0	0	7
Gm10179	0	0	0	0	0	2	0
Tmem176b	3	0	3	0	0	0	0
Sfxn3	0	0	0	0	0	11	0
Gm11789	0	0	0	0	2	0	0
Ptpn4	0	0	0	0	0	1	0
Gtpbp10	0	0	0	0	1	0	0
Coil	0	0	0	0	1	0	0
1700021A07Rik	1	0	0	0	0	0	0
Gm11611	0	0	0	0	3	6	0
Sema3b	0	0	0	0	10	4	26
Btn1a1	0	0	2	0	0	0	0
Srp14	0	0	0	0	0	1	0
Ahsa1	0	0	0	0	4	0	0
Gm13645	0	0	0	0	4	0	0
Nprl3	0	0	0	0	4	0	0
Timm44	0	0	0	0	0	12	0
Nr5a1	0	0	0	0	1	0	0
Six4	0	0	0	0	1	0	0
4930451E10Rik	0	0	0	0	0	0	1
Rbm19	0	0	0	0	2	2	0
Cdc37	0	0	0	0	10	0	0
Zfp119b	2	0	0	0	0	1	0
Gm16172	0	0	0	0	6	0	0
1700020I14Rik	0	0	0	0	5	0	4
Iqcf3	0	0	0	0	0	2	0
Gpatch1	0	0	0	0	9	0	0
Neat1	0	0	0	0	5	3	0
Ndufa8	1	0	0	0	24	0	1
Gm11474	0	0	0	0	4	0	0
Nhlrc2	6	0	0	0	0	0	0
Hist1h2ad	0	0	3	0	0	0	0
Surf2	1	0	0	0	2	2	0
Zfp64	0	0	0	0	2	15	0
Mefv	0	0	0	0	6	0	0
Cerkl	1	0	0	0	0	0	0
Gm20430	0	0	0	0	1	0	0
Nkain1	0	0	0	0	1	15	0
Rbm15	0	0	0	0	12	0	0
Ciapin1	0	0	0	0	1	11	0
Gm10039	0	0	0	0	1	0	0
Gm13786	0	0	0	0	7	0	0
Hhipl1	0	0	0	0	8	0	0
Kctd10	0	0	0	0	17	0	1
Pik3cd	0	0	0	0	12	8	0
2310044H10Rik	0	0	0	0	1	2	0
Mtmr11	0	0	0	0	0	8	0
Smarce1	0	0	0	0	16	0	0
Thap7	0	0	0	0	2	0	0
Psmc3	0	0	0	0	27	4	0
Itk	10	0	0	0	0	0	0
Fgf1	0	0	0	0	2	0	0
Cyb5r3	0	0	0	0	0	8	0
Ndufs3	0	0	0	0	30	4	0
Bub3	0	0	0	0	0	3	0
Slc35e4	0	0	0	0	4	0	0
Steap2	0	0	0	0	1	0	0
4731419I09Rik	0	0	0	0	3	1	0
Omg	2	0	0	0	7	0	0
Psmd11	0	0	0	0	3	0	0
Ik	0	0	0	0	0	5	0
Scaf8	3	0	0	0	18	29	0
Gm11753	0	0	0	0	0	1	0
Wfdc11	0	0	0	0	1	2	0
D17H6S53E	0	0	0	0	3	0	0
Ankrd54	0	0	0	0	4	9	10
Lsm11	0	0	0	0	1	0	0
Anxa13	0	0	0	0	0	1	0
Plec	0	0	0	0	8	31	0
AC132957.1	0	0	0	0	0	4	0
Akt3	0	0	0	0	3	0	0
Prdm16	0	0	0	0	5	0	0
AI606181	0	0	0	0	0	4	0
Ubl7	0	0	0	0	0	13	3
Gm4955	2	0	0	0	0	0	0
SNORA38	0	0	0	0	3	0	0
Ranbp2	0	0	0	0	0	33	0
Itih1	0	0	0	0	1	0	0
Gm11274	0	6	0	0	0	0	0
Spata1	0	0	0	0	5	0	0
Zfp384	0	0	0	0	3	0	0
Wnt9a	0	0	0	0	0	1	0
Stk10	0	0	0	0	4	1	0
Pou2f3	0	0	0	0	0	1	0
Fancd2	0	0	0	0	2	0	0
Galr2	0	0	0	0	13	5	0
Tns4	0	0	0	0	7	0	0
Pip5k1c	0	0	0	0	24	18	0
Gpr146	0	0	0	0	14	0	1
Ankrd10	0	0	0	0	2	0	0
Cryaa	0	0	0	0	1	0	0
Nfam1	0	0	0	0	0	2	0
U2af1l4	0	0	0	0	0	4	0
Abhd14b	0	0	0	0	19	15	0
Gm5227	0	0	0	0	1	0	0
2600006K01Rik	0	0	0	0	1	1	4
Tbc1d10a	0	0	0	0	4	0	0
AL626784.1	0	0	0	0	1	0	0
Gimap4	1	0	1	0	0	0	0
Cryzl1	0	0	0	0	12	0	0
Tmem198	0	0	0	0	0	12	4
Adssl1	0	0	0	0	4	29	0
AC161218.1	0	0	0	0	0	3	0
Gm13359	0	0	0	0	3	0	0
Snord34	0	0	0	0	2	3	0
1700122E12Rik	0	0	0	0	0	3	0
Atp5sl	0	0	0	0	2	0	0
Suv420h2	0	0	0	0	6	8	0
Pgbd1	0	20	0	0	0	0	0
Ankrd23	0	0	0	0	0	3	0
Lamtor2	0	0	0	0	4	3	0
Tnfaip2	0	0	0	0	13	7	0
Atp5g1	0	0	0	0	0	0	3
Slc44a1	0	0	10	0	1	0	0
Qrich1	0	0	0	0	1	6	0
Vps25	0	0	0	0	5	1	0
2610035D17Rik	0	0	0	0	4	0	0
Tspan11	0	0	0	0	0	4	0
Ggt1	0	0	0	0	1	0	7
0610008F07Rik	0	0	0	0	0	1	0
Bcr	0	0	0	0	9	0	0
Gpr19	0	0	0	0	0	3	0
Slc9a5	0	0	0	0	9	16	0
Gm10517	4	0	0	0	0	0	0
Lyst	0	0	0	0	7	0	0
D8Ertd738e	0	0	0	0	0	2	0
Cd151	0	0	0	0	9	12	1
Ankrd39	0	0	0	0	0	2	0
Gm8909	0	0	0	0	3	0	0
Exd2	1	0	0	0	4	2	5
Zfp612	1	0	0	0	0	0	0
Fam126a	0	0	0	0	0	7	0
Amica1	2	0	0	0	2	0	0
Gm5045	0	0	0	0	5	0	0
Gm11518	0	0	0	0	6	3	0
Gbx1	0	0	0	0	0	2	0
Gm16333	0	0	0	0	2	1	0
Pbx2	0	0	0	0	5	7	0
Gm12500	0	0	0	0	2	0	1
Hist1h4j	0	19	0	0	0	0	0
Sox15	0	4	0	0	9	5	0
Kdm2a	0	0	0	0	2	7	0
Vmn1r	0	0	2	0	0	6	0
Ppapdc2	0	0	2	0	0	0	0
Bcmo1	0	0	0	0	2	0	0
Shc2	0	0	0	0	12	1	4
Mark4	0	0	0	0	5	1	0
[truncated: 9,162 more rows]
