# Supplementary material for: Plasticity of Epigenomic and Transcriptomic Aging Reveals Common Targets for Reprogramming by Environmental Exposures
Source: Research Square preprint supplement (doi:10.21203/rs.3.rs-7368222/v1), 2025-09-19
Supplement: Supplementary file 7 [file 91dc4ec2e49629a2a17f84b9.xlsx]

## Sheet: SuppTable1A_DEGs
Supplemental Table 1A: Differentially Expressed Genes (DEGs) in comparisons of aging (Figure 1) or exposures (Figure 2)
Cutoffs for DEGs are linear fold change exceeding 1.5 and adjusted p-value (FDR) < 0.05
Values are log2 fold change
Gene	Liver_Female_aging_10mo.Aged_over._5mo.Adult	Liver_Female_aging_5mo.Adult_over_3wk.Weanling	Liver_Male_aging_10mo.Aged_over._5mo.Adult	Liver_Male_aging_5mo.Adult_over_3wk.Weanling	Liver_Female_5mo.Adult_BPA.hi.over.VEH	Liver_Female_5mo.Adult_BPA.lo.over.VEH	Liver_Female_5mo.Adult_DEHP.over.VEH	Liver_Female_5mo.Adult_PM2.5_JHU.over.VEH	Liver_Female_5mo.Adult_PM2.5_Chi.over.VEH	Liver_Female_5mo.Adult_Pb.over.VEH	Liver_Female_5mo.Adult_TBT.over.VEH	Liver_Female_5mo.Adult_TCDD.over.VEH	Liver_Male_5mo.Adult_BPA.hi.over.VEH	Liver_Male_5mo.Adult_BPA.lo.over.VEH	Liver_Male_5mo.Adult_DEHP.over.VEH	Liver_Male_5mo.Adult_PM2.5_JHU.over.VEH	Liver_Male_5mo.Adult_PM2.5_Chi.over.VEH	Liver_Male_5mo.Adult_Pb.over.VEH	Liver_Male_5mo.Adult_TBT.over.VEH	Liver_Male_5mo.Adult_TCDD.over.VEH
Gm10036	4.69194	0	4.71818	0	0	0	0	0	0	0	0	0	0	0	0	0	0	0	0	0
mt-Nd3	3.868	0	3.79332	0	0	0	0	0.63939	0	0	0	0	0.684908	0	0	-0.684347	0	0	0	0
Rpl9-ps6	3.68492	0	3.5286	0	0	0	0	0	0	0	0	0	0	0	0	0	0	0	0	0
Gm12751	3.34381	0	3.14948	0	0	0	0	0	0	0	0	0	0	0	0	0	0	0	0	0
Rps10-ps2	2.93615	0	2.6485	0	0	0	0	0	0	0	0	0	0	0	0	0	0	0	0	0
Gm15501	2.8305	0	2.95819	0	0	0	0	0	0	0	0	0	0	0	0	0	0	0	0	0
Sult2a7	2.70764	3.76228	1.21871	2.03757	-1.40417	-1.86914	0	1.68899	1.19001	0	0	0	-1.63532	0	0	0	0	0	0	0.812181
Mmp12	2.63765	0	0	0	0	0	0	0	0	0	3.29582	0	1.01672	0	0	0	0	2.23378	0	0
Gm28438	2.63636	0	2.58753	0	0	0	0	0	0	0	0	0	0	0	0	0	0	0	0	0
Gm7536	2.61593	0	2.46756	0	0	0	0	0	0	0	0	0	0	0	0	0	0	0	0	0
Gm10925	2.52116	0	1.6829	0	0	0	0	0	0	0	0	0	0	0	0	0	0	0	0	0
Gm10076	2.47432	0	1.94886	0	0	0	0	0	0	0	0	0	0	0	0	0	0	0	0	0
Mir703	2.44432	0	1.98373	0	0	0	0	0	0	0	0	0	0	0	0	0	0	0	0	0
Gm28437	2.42463	0	1.61752	0	0	0	0	0	0	0	0	0	0	0	0	0	0	0	0	0
Gm10123	2.31657	0	1.84824	0	0	0	0	0	0	0	0	0	0	0	0	0	0	0	0	0
Gm14327	2.26141	0	1.41278	2.61284	0	0	0	0.701537	0	0	0	0	0	0	0	0	0	0	0	0
Gm4149	2.24557	0	2.04151	0	0	0	0	0	0	0	0	0	0	0	0	0	0	0	0	0
Sult2a3	2.24204	0.879704	0	-8.66651	0	-0.592001	0	2.70903	3.04663	0	-1.09583	-0.695197	0	0	0	0	0	0	0	0
Gm22513	2.21304	0	1.76567	0	0	0	0	0	0	0	0	0	0	0	0	0	0	0	0	0
Gm13577	2.16632	0	2.21482	0	0	0	0	0	0	0	0	0	0	0	0	0	0	0	0	0
Sec61g	2.16396	0	1.59568	0	0	0	0	0	0	-0.642942	0	0	0	0	0	-0.744688	0	0	0	0
Rpl9	2.09899	0	1.51332	-0.750168	0	0	0	0	0	0	0	0	0	0	0	0	0	0	0	0
Gm8430	2.09463	0	1.51812	0	0	0	0	0	0	0	0	0	0	0	0	0	0	0	0	0
mt-Tq	2.09188	0	2.60392	0	0	0	0	0	0	0	0	0	0	0	0	0	0	0	0	0
Gm3699	2.06931	0	1.69071	0	0	0	0	0	0	0	0	0	0	0	0	0	0	0	0	0
Rims4	2.04223	0	0	0	0	0	0	0	0	0	0	0	0	0	0	0	0	0	0	0
Gm29216	2.0417	0	1.1225	0	0	0	0	0	0	0	0	0	0	0	0	0	0	0	0	0
Snora78	2.02486	0	2.03723	0	0	0	0	0	0	0	0	0	0	0	0	0	0	0	0	0
mt-Tt	2.00566	0	1.99672	0	0	0	0	0	0	0	0	0	0	0	0	0	0	0	0	0
Gm9843	2.00095	0	1.97875	0	0	0	0	0	0	0	0	0	0	0	0	0	0	0	0	0
Lsm7	1.99631	0	1.68601	0	0	0	0	0	0	0	0	0	0	0	0	0	0	0	0	0
H3f3a	1.95899	0	1.76627	-0.620529	0	0	0	0	0	0	0	0	0	0	0	0	0	0	0	0
Atp5l	1.9537	0	1.68209	0	0	0	0	0	0	0	0	0	0	0	0	0	0	0	0	0
Gm10222	1.94877	0	0	0	0	0	0	0	0	0	0	0	0	0	0	0	0	0	0	0
Rpl5	1.92431	0	1.2331	0	0	0	0	0	0	0	0	0	0	0	0	0	0	0	0	0
Rps23-ps1	1.90306	0	1.43789	0	0	0	0	0	0	0	0	0	0	0	0	0	0	0	0	0
Gm15459	1.88704	0	1.35661	0	0	0	0	0	0	0	0	0	0	0	0	0	0	0	0	0
Rps3a2	1.88031	0	1.5244	0	0	0	0	0	0	0	0	0	0	0	0	0	0	0	0	0
Mup20	1.87169	1.95786	0.76052	7.51704	0	0	0	-0.852988	0	0	1.63951	0	0	0	0	-0.855855	0	0	0	-0.612011
Gm24336	1.86407	0	2.36961	0	0	0	0	0	0	0	0	0	0	0	0	0	0	0	0	0
Rps23-ps2	1.85349	0	0	0	0	0	0	0	0	0	0	0	0	0	0	0	0	0	0	0
Adcy1	1.85059	-0.803489	-1.21647	-0.989323	0	0	0	0	0.712492	0	-1.27623	3.66787	0	0	0	0	0	0	-1.63383	0
Gm8730	1.84675	0	1.70591	0	0	0	0	0	0	0	0	0	0	0	0	0	0	0	0	0
Gm15500	1.82873	0	1.30343	0	0	0	0	0	0	0	0	0	0	0	0	0	0	0	0	0
Gm26384	1.81128	0	0	0	0	0	0	0	0	0	0	0	0	0	0	0	0	0	0	0
Rps6-ps4	1.80412	0	1.41256	0	0	0	0	0	0	0	0	0	0	0	0	0	0	0	0	0
Rps24	1.79854	0	1.03003	0	0	0	0	0	0	0	0	0	0	0	0	0	0	0	0	0
Gm36435	1.78013	0	1.07598	0	0	0	0	0	0	0	0	0	0	0	0	0	0	0	0	0
Gm22154	1.76481	0	1.84141	0	0	0	0	0	0	0	0	0	0	0	0	0	0	0	0	0
Gm15401	1.75379	0	1.3614	0	0	0	0	0	0	0	0	0	0	0	0	0	0	0	0	0
Rpl17	1.75323	0	1.30507	0	0	0	0	0	0	0	0	0	0	0	0	0	0	0	0	0
Gm25394	1.73349	0	1.53654	0	0	0	0	0	0	0	0	0	0	0	0	0	0	0	0	0
Eif3j2	1.7318	-0.751412	1.71936	-0.794151	0	0	0	0	0.737396	0	0	0	0	0	0	0	0	0	0	0
Gm49024	1.72553	0	1.44857	0	0	0	0	0	0	0	0	0	0	0	0	0	0	0	0	0
Erh	1.72102	-0.699507	1.42629	-0.693032	0	0	0	0	0	0	0	0	0	0	0	0	0	0	0	0
Gm37336	1.71601	0	1.03823	0	0	0	0	0	0	0	0	0	0	0	0	0	0	0	0	0
Gm4045	1.6995	0	1.1436	0	0	0	0	0	0	0	0	0	0	0	0	0	0	0	0	0
Rpl35	1.69054	0	1.06087	0	0	0	0	0	0	0	0	0	0	0	0	0	0	0	0	0
Gm10288	1.68587	0	1.51128	0	0	0	0	0	0	0	0	0	0	0	0	0	0	0	0	0
Rpl36a-ps2	1.67845	0	1.20307	0	0	0	0	0	0	0	0	0	0	0	0	0	0	0	0	0
Immp1l	1.66725	0	1.11687	0	0	0	0	0	0	-0.608503	0	0	0	0	0	-0.679665	0	0	0	0
Polr2k	1.64691	0	1.12927	0	0	0	0	0	0	0	0	0	0	0	0	0	0	0	0	0
Ndufb4	1.64672	0	1.35805	0	0.685455	0	0	0	0	0	0	0	0	0	0	0	0	0	0	0
Gpx4-ps2	1.64264	0	1.34633	0	0	0	0	0	0	0	0	0	0	0	0	0	0	0	0	0
Gm5822	1.64128	0	0	0	0	0	0	0	0	0	0	0	0	0	0	0	0	0	0	0
Rps12	1.62823	0	0.912004	0	0	0	0	0	0	0	0	0	0	0	0	0	0	0	0	0
Gm6135	1.6244	0	1.51323	0	0	0	0	0	0	0	0	0	0	0	0	0	0	0	0	0
Wfdc17	1.60892	0	0.866192	0	0	-0.904477	-0.829917	0	0	-0.911786	0	0	0	0	0	-0.898002	0	0	0	0
Gm13394	1.60262	0	0.676479	0	0	0	0	0	0	0	0	0	0	0	0	0	0	0	0	0
Ndufs5	1.59854	0	1.63942	0	0	0	0	0	0	0	0	0	0	0	0	0	0	0	0	0
Rpl10-ps3	1.59615	0	1.71031	0	0	0	0	0	0	0	0	0	0	0	0	0	0	1.81682	0	0
Tomm5	1.56952	0	1.11421	0	0	0	0	0.708904	0	0	0	0	0	0	0	-0.825245	0	0	0	0
Rpl41	1.56689	0	1.07567	0	0	0	0	0	0	0	0	0	0	0	0	-0.737075	0	0	0	0
Gm6136	1.56514	0	1.60389	0	0	0	0	0	0	0	0	0	0	0	0	0	0	0	0	0
Rpl3-ps1	1.56396	0	1.33519	0	0	0	0	0	0	0	0	0	0	0	0	0	0	0	0	0
Gm10736	1.56039	0	1.03258	0	0	0	0	0	0	0	0	0	0	0	0	0	0	0	0	0
Gm34654	1.55742	0	1.00277	0	0	0	0	0	0	0	0	0	0	0	0	0	0	0	0	0
Gm5905	1.55368	0	1.56536	0	0	0	0	0	0	0	0	0	0	0	0	0	0	0	0	0
Jchain	1.55254	2.79006	1.41852	1.92864	0	0	0	0	-0.783451	0	0	-1.08054	0	0	0	-1.63594	0	0	2.47588	0
Rnu3a	1.55172	0	1.40436	0	0	0	0	0	0	0	0	0	0	0	0	0	0	0	0	0
Gpx4	1.54967	0	1.20153	0	0	0	0	0	0	0	0	0	0	0	0	0	0	0	0	0
Pdcd10	1.53572	0	1.00055	0	0	0	0	0	0	-0.588278	0	0	0	0	0	0	0	0	0	0
Rps16	1.52095	0	1.10583	-0.587207	0	0	0	0	0	0	0	0	0	0	0	0	0	0	0	0
Rpl27	1.51801	0	1.37723	-0.589747	0	0	0	0	0	0	0	0	0	0	0	0	0	0	0	0
Gm43449	1.51422	0	1.12755	0	0	0	0	0	0	0	0	0	0	0	0	0	0	0	0	0
Gm11361	1.49993	0	1.59163	0	0	0	0	0	0	0	0	0	0	0	0	0	0	0	0	0
Rps7	1.49454	0	0.933789	0	0	0	0	0	0	0	0	0	0	0	0	-0.62237	0	0	0	0
Mrps33	1.49135	0	0.955152	0	0	0	0	0	0	0	0	0	0	0	0	0	0	0	0	0
Gm9800	1.48852	0	0	0	0	0	0	0	0	0	0	0	0	0	0	0	0	0	0	0
Gm1821	1.48723	0	1.45425	0	0	0	0	0	0	0	0	0	0	0	0	0	0	0	0	0
Timm23	1.48668	0	1.2312	0	0	0	0	0	0	0	0	0	0	0	0	0	0	0	0	0
Cd63	1.48618	-2.39133	0	-2.4221	0	0	0	0	0	0	2.10282	0	0.870872	0	0	0	0	0.722592	0	0
Rpl34	1.47741	0	0.894229	0	0	0	0	0	0	0	0	0	0	0	0	-0.617767	0	0	0	0
AC135964.2	1.47245	0	0.987432	0	0	0	0	0	0	0	0	0	0	0	0	0	0	0	0	0
mt-Tw	1.46814	0	1.81629	0	0	0	0	0	0	0	0	0	0	0	0	0	0	0	0	0
Clec7a	1.46631	0	0	0	0	0	0	0	0	0	0	0	0	0	0	0	0	0	0	0
Ifi27l2b	1.46331	0.759899	0	0.744779	0	0	0	0	0.61307	0.857247	1.00606	0	0.904866	0	0	0	-0.85028	1.28711	0.660319	0
Zfp931	1.45988	0	0.919319	0	0	0	0	0	0	0	0	0	0	0	0	-0.619588	0	0	0	0
Gm44744	1.45485	0	0.97125	0	0	0	0	0	0	0	0	0	0	0	0	0	0	0	0	0
Rpl11	1.45093	0	0.979293	0	0	0	0	0	0	0	0	0	0	0	0	0	0	0	0	0
Rpl36-ps12	1.44697	0	1.583	0	0	0	0	0	0	0	0	0	0	0	0	0	0	0	0	0
1810032O08Rik	1.44572	0	0.684959	0	0	0	0	0	0	0	0	0	0	0	0	0	0	0	0	0
Ighg2c	1.44511	0	0	0	0	0	0	0	0	0	0	0	0	0	0	0	0	0	0	0
Rps18	1.44427	0	0.768377	0	0	0	0	0	0	0	0	0	0	0	0	-0.620188	0	0	0	0
Rps27a	1.44213	0	0.691174	0	0	0	0	0	0	0	0	0	0	0	0	-0.62801	0	0	0	0
Gm28439	1.43992	0	0	0	0	0	0	0	0	0	0	0	0	0	0	0	0	0	0	0
Pnpla5	1.43865	-0.812868	0	-1.12605	0	0	0	0	1.22469	0	0	0	-2.33708	-1.20031	0	0	0	0	0	0
Pnpla3	1.43097	0	0	-2.21117	0	0	0	0	1.06059	0	-1.63883	0	-1.3547	-1.2842	0	0	0	0	0	0
Snord104	1.42959	0	1.1099	0	0	0	0	0	0	0	0	0	0	0	0	0	0	0	0	0
Gm13522	1.41077	0	0.598645	0	0	0	0	0	0	0	0	0	0	0	0	0	0	0	0	0
Gm8186	1.40266	0	0.863876	0	0	0	0	0	0	0	0	0	0	0	0	0	0	0	0	0
Pfdn5	1.40141	0	1.01031	0	0	0	0	0	0	0	0	0	0	0	0	0	0	0	0	0
Gt(ROSA)26Sor	1.40099	0	1.13885	0	0	0	0	0	0	0	0	0	0	0	0	0	0	0	0	0
Cib3	1.38993	0	-0.754089	1.97647	0	0	0	0	0	0	0	-1.06214	0.96664	0	0	-1.59705	0	0.747293	0	-1.9877
Dnajc15	1.37303	0	1.08924	0	0	0	0	0	0	0	0	0	0	0	0	0	0	0	0	0
Snrpg	1.36857	0	0.651252	0	0	0	0	0	0	0	0	0	0	0	0	0	0	0	0	0
Ppih	1.36727	0	0.936503	0	0	0	0	0	0	0	0	0	0	0	0	0	0	0	0	0
Hspe1	1.36649	0	0.948013	0	0	0	0	0	0	0	0	0	0	0	0	0	0	0	0	0
Gm6170	1.36521	0	1.09243	0	0	0	0	0	0	0	0	0	0	0	0	0	0	0	0	0
Sult2a5	1.36207	-3.53054	0	-10.718	0	0	0	0	1.77798	0	2.33966	-0.977395	0	0	0	0	0	0	0	0
Rpl19-ps11	1.36034	0	1.24109	0	0	0	0	0	0	0	0	0	0	0	0	0	0	0	0	0
Gm44096	1.35831	0	1.47987	0	0	0	0	0	0	0	0	0	0	0	0	0	0	0	0	0
4732419C18Rik	1.35785	0	0.690205	0	0	0	0	0	0	0	0	0	0	0	0	0	0	0	0	0
Rpl35a	1.35765	0	0.954354	0	0	0	0	0	0	0	0	0	0	0	0	0	0	0	0	0
mt-Co3	1.35516	0	1.11498	0	0	0	0	0.617014	0	0	0	0	0	0	0	0	0	0	0	0
B430119L08Rik	1.35219	0	1.51905	0	0	0	0	0	0	0	0	0	0	0	0	0	0	0	0	0
Bloc1s2	1.35138	0	1.01426	0	0	0	0	0	0	0	0	0	0	0	0	0	0	0	0	0
Cd207	1.35085	1.581	0.656151	1.44651	0	0	0	0	0	0	0	0.861217	0	0	0	0	-1.1568	0	0	0
2410006H16Rik	1.35044	0	0.940893	0	0	0	0	0	0	0	0	0	0	0	0	0	0	0	0	0
Rpl27a	1.34948	0	1.07576	0	0	0	0	0	0	0	0	0	0	0	0	0	0	0	0	0
Tma7	1.3458	0	0.872881	0	0	0	0	0	0	0	0	0	0	0	0	0	0	0	0	0
Mrpl23	1.34413	0	1.04713	0	0	0	0	0	0	0	0	0	0	0	0	0	0	0	0	0
Med21	1.34352	0	0.736805	0	0	0	0	0	0	0	0	0	0	0	0	-0.679262	0	0	0	0
Rps27rt	1.33874	0	1.23367	0	0	0	0	0	0	0	0	0	0	0	0	0	0	0.765149	0	0
Snrpd1	1.33193	0	0.932415	0	0	0	0	0	0	0	0	0	0	0	0	0	0	0	0	0
Rpl22l1	1.32836	-1.05509	0	-0.912649	0	0	0	0.679934	0	0	0	0	0	0	0	-1.11773	0	0	0	0
Rps3	1.32832	0	0.718356	0	0	0	0	0	0	0	0	0	0	0	0	-0.619636	0	0	0	0
AI413582	1.32792	0	0	0	0	0	0	0	0	0	0	0	0	0	0	0	0	0	0	0
Leap2	1.32407	0	0.990012	0	0	-0.629043	0	0.908672	0	0	0	0	-0.675705	0	0	0	0.646771	0	-0.598314	0
Pdk4	1.32266	0	0.755307	0	0.733779	0.654115	0	1.70877	0.841082	0	-0.641295	2.4642	-0.589261	-1.6431	-0.870098	0	0	-1.41229	-1.26675	0
Rpl19	1.32108	0	1.01974	0	0	0	0	0	0	0	0	0	0	0	0	0	0	0	0	0
5033403H07Rik	1.32068	0	0.98259	0	0	0	0	0	0	0	0	0	0	0	0	0	0	0	0	0
Cbr3	1.31571	0	0	0	0	0	0	0	0	1.35925	0	0	0	0	0	-0.740274	0	0	0	0
9630013D21Rik	1.31553	0	0.751223	0	0	0	0	0	0	0	0	0	0	0	0	0	0	0	0	0
Nsa2	1.31539	0	0.927758	0	0	0	0	0	0	0	0	0	0	0	0	0	0	0	0	0
Znhit3	1.31404	0	1.03114	0	0	0	0	0	0	0	0	0	0	0	0	0	0	0	0	0
Rbm3	1.31239	-1.40802	0.615905	-1.21819	0	0	0	0	0	0	0.867534	0	0	0.60098	0	0	0	0	0	0
Npm3	1.31212	0	0.89621	0	0	0	0	0	0	0	0	0	0	0	0	0	0	0	0	0
Gm14418	1.30835	0	0.688915	0	0	0	0	0.616726	0	0	0	0	0	0	0	0	0	0	0	0
Gm48702	1.30826	0	1.55896	0	0	0	0	0	0	0	0	0	0	0	0	0	0	0	0	0
Gm14005	1.30719	0	0	0	0	0	0	0	0	0	0	0	0	0	0	0	0	0	0	0
Usmg5	1.306	0	0.981374	0	0	0	0	0	0	0	0	0	0	0	0	0	0	0	0	0
Gm2000	1.30591	-0.639838	0.778514	-0.678815	0	0	0	0	0	0	0	0	0	0	0	-1.55426	0	0.996021	0	0
Ccdc122	1.30078	0	0.698576	0	0	0.685741	0	0	0	0	0	0	0	0	0	0	0	0	0	0
C330021F23Rik	1.29973	0	0.740133	0	0	0	0	0	0	0	0	0	0	0	0	0	0	0	0	0
Gm13339	1.29583	0	1.83053	0	0	0	0	0	0	0	0	0	0	0	0	0	0	0	0	0
Rps8	1.2958	0	0.997611	-0.613654	0	0	0	0	0	0	0	0	0	0	0	0	0	0	0	0
Cxcl1	1.29473	0.639009	0	1.7798	0	0	0	0	0	0	0.978994	-0.978788	0	1.26023	0	0	-0.92108	0	-2.27817	-1.00255
Rpl12	1.28757	0	0	0	0	0	0	0	0	0	0	0	0	0	0	-0.789327	0	0	0	0
Rps19	1.28622	0	0.809893	0	0	0	0	0	0	0	0	0	0	0	0	0	0	0	0	0
Sox4	1.28521	-1.00802	0	-1.10769	0	0	0	0	0.641162	0	1.61856	0	1.47573	0	0	-0.722901	0	0	0	0
Pard3bos3	1.28041	0	0	0	0	0	0	0	0	0	0	0	0	0	0	0	0	0	0	0
Acyp2	1.27869	-0.599816	0.963765	0	0	0	0	0.925642	0	0	0	0	0	0	0	0	0	0	0	0
Gm25788	1.2786	0	1.25609	0	0	0	0	0	0	0	0	0	0	0	0	0	0	0	0	0
Aqp8	1.277	0	0.676421	0	0	0	0	0.980416	0.614031	0.75649	-0.921144	0	0	0	0	-1.06379	0.78358	0	0	0
Ms4a4b	1.27512	0	0	-1.0486	0	0	0	0	0	0	1.24142	0	0	0	0	0	0	0	0	0
2900076A07Rik	1.27323	0	0.950492	0	0	0	0	0	0	0	0	0	0	0	0	0	0	0	0	0
Exoc3l4	1.27016	-1.24208	0	-0.986733	0	0	0	0	0	0	1.10576	0	0	0	0	0	0	0	1.94086	0
Rpl10a	1.26899	0	0.694884	0	0	0	0	0	0	0	0	0	0	0	0	0	0	0	0	0
Ly6d	1.26586	0	-0.653261	1.42037	0	0.709562	0	1.82986	0.732347	1.96519	2.51902	0	0	0	0	0	0.702135	0	-1.081	1.40324
Serpinb1a	1.26518	2.53747	1.13372	0	0	0	0	0.714373	0.762837	0	0	0	0	0	0	0.955207	0.790052	0	2.11379	0
Kbtbd3	1.26516	0	0.908309	0	0	0	0	0.588244	0	0	0	0	0	0	0	-0.753138	0	0	0	0
2010001A14Rik	1.26413	0	0.829086	0	0	0	0	0	0	0	0	0	0	0	0	0	0	0	0	0
Chchd1	1.26354	0	0.861295	0	0	0	0	0	0	0	0	0	0	0	0	0	0	0	0	0
Fau	1.26133	0	0.900001	0	0	0	0	0	0	0	0	0	0	0	0	0	0	0	0	0
Zfas1	1.25641	0	0.830544	0	0	0	0	0	0	0	0	0	0	0	0	0	0	0	0	0
Kcnq1ot1	1.25426	0	1.11228	0	0	0	0	0	0	0	0	0	0	0	0	0	0	0	0	0
Chrna1os	1.25176	0	1.01646	0	0	0	0	0	0	0	0	0	0	0	0	0	0	0	0	0
5033421B08Rik	1.25126	0	0.82804	0	0	0	0	0	0	0	0	0	0	0	0	0	0	0	0	0
Rps6	1.25122	0	0.861046	0	0	0	0	0	0	0	0	0	0	0	0	0	0	0	0	0
Rps25	1.25105	0	0.636404	0	0	0	0	0	0	0	0	0	0	0	0	0	0	0	0	0
Gm13456	1.25096	0	0.996503	0	0	0	0	0	0	0	0	0	0	0	0	0	0	0	0	0
Gm28661	1.24952	0	0	0	0	0	0	0	0	0	0	0	0	0	0	0	0	0	0	0
Smim6	1.24728	0	0	-1.26925	0	0	0	0	0	0	0	0	0	0	0	0	0	0	0	0
Gm16062	1.24591	0	0.827569	0	0	0	0	0	0	0	0	0	0	0	0	0	0	0	0	0
Cxcr4	1.24024	-0.610672	0	-0.844611	0	0	0	0	0	0	1.37449	0	0	0	0	0	0	0	0	0
Esm1	1.23819	0	-1.06187	0	0	0	0	0	0	0	0	-0.96145	0	0	0	-1.8322	-0.922021	0	0	-1.052
Rgs1	1.23386	0	0	0	0	0	0	0.920382	0	0	0	0.720325	0	0	0	0	0	0	0	0
Snrnp25	1.23258	-0.921662	0.61978	-1.21113	0	0	0	0	0	0	0	0	0	0	0	-0.647255	0	0	0	0
Rps14	1.23173	0	0.817518	0	0	-0.683587	0	0	0	0	0	0	0	0	0	-0.697704	0	0	0	0
Gm13657	1.23131	0	0.637219	0	0	0	0	0	0	0	0	0	0	0	0	0	0	0	0	0
Ptpn18	1.229	0	0.64177	-0.97733	0	0	0	0	0	0	0	0	0	0	0	-1.04398	0	0	0	0
Gm6472	1.2259	0	0.800739	0	0	0	0	0	0	0	0	0	0	0	0	0	0	0	0	0
Oaz1-ps	1.22529	0	1.10983	0	0	0	0	0	0	0	0	0	0	0	0	0	0	0	0	0
Rps16-ps2	1.22493	0	0.839611	0	0	0	0	0	0	0	0	0	0	0	0	0	0	0	0	0
Gm36041	1.21671	0	1.28492	0	0	0	0	0	0	0	0	0	0	0	0	0	0	0	0	0
Oaz1	1.21452	0	1.18026	0	0	0	0	0	0	0	0	0	0	0	0	0	0	0	0	0
Scarna13	1.21271	0	1.46735	0	0	0	0	0	0	0	0	0	0	0	0	0	0	0	0	0
Tomm20	1.21155	0	0.795809	0	0	0	0	0	0	0	0	0	0	0	0	0	0	0	0	0
Rpl36	1.21004	0	0.899193	-0.662263	0	0	0	0	0	0	0	0	0	0	0	0	0	0	0	0
Cops9	1.20511	0	0.863404	0	0	-0.608189	0	0	0	0	0	0	0	0	0	0	0	0	0	0
Serf1	1.20175	0	0.778569	0	0	0	0	0	0	0	0	0	0	0	0	-0.630872	0	0	0	0
Gm7609	1.20158	0	0.887646	0	0	0	0	0	0	0	0	0	0	0	0	0	0	0	0	0
Pycard	1.20115	0	0	0	0	0	0	0.632041	0	0	0	0	0	0	0	-0.897443	0	0	1.64476	0
Ms4a7	1.19919	0	0	0	-1.15495	0	0	0	0	0	1.70995	0	0	0	0	0	0	0	0	0
Ms4a6b	1.19637	0	0	-0.656089	0	0	0	0	0	0	0	0	0	0	0	0	0	0	0	0
Rps13	1.19496	0	0.851676	0	0	0	0	0	0	0	0	0	0	0	0	0	0	0	0	0
Gm17196	1.19319	0	0.719485	0	0	0	0	0	0	0	0	0	0	0	0	0	0	0	0	0
Mir99ahg	1.19091	0	0.990216	0	0	0	0	0	0	0	0	0	0	0	0	0	0	0	0	0
Lsm5	1.18681	0	0	0	0	0	0	0	0	0	0	0	0	0	0	0	0	0	0	0
Tmsb10	1.18618	-0.880418	0	-1.40519	0	0	0	0	0	0	1.26673	0	0	0	0	0	0	0	0	0
Rps23	1.18504	0	0.843299	0	0	0	0	0	0	0	0	0	0	0	0	0	0	0	0	0
Rps9	1.18497	0	0.793557	0	0	0	0	0	0	0	0	0	0	0	0	0	0	0	0	0
Rpl10a-ps1	1.18013	0	0.656712	0	0	0	0	0	0	0	0	0	0	0	0	0	0	0	0	0
1810008I18Rik	1.18005	0	0.634795	0	0	0	0	0	0	0	0	0	0	0	0	0	0	0	0	0
Rnf7	1.17973	0	0.882316	0	0	0	0	0	0	0	0	0	0	0	0	0	0	0	0	0
Snora74a	1.17921	0	1.35971	0	0	0	0	0	0	0	0	0	0	0	0	0	0	0	0	0
Tpt1-ps3	1.17672	0	0.642834	0	0	0	0	0	0	0	0	0	0	0	0	0	0	0	0	0
Gm15590	1.17371	0	0.820165	0	0	0	0	0	0	0	0	0	0	0	0	0	0	0	0	0
Gm11967	1.17366	0	0.606483	0	0	0	0	0	0	0	0	0	0	0	0	0	0	0	0	0
Rps21	1.17138	0	0.655897	0	0	0	0	0	0	0	0	0	0	0	0	0	0	0	0	0
Snrpert	1.1704	0	0	0	0	0	0	0	0	0	0	0	0	0	0	0	0	0	0	0
Gng11	1.16895	-0.72991	0.635078	-1.18063	0	0	0	0	0	0	0	0	0	0	0	-1.19221	0	0	0	0
Gm12481	1.16838	0	0.725824	0	0	0	0	0	0	0	0	0	0	0	0	0	0	0	0	0
Oas1g	1.16809	0	0	-0.609002	0	0	0	0.781161	0	0	0	0	0	0	0	0	0	0	0	0
Rpl31	1.1675	0	0.586632	0	0	0	0	0	0	0	0	0	0	0	0	-0.671337	0	0	0	0
Gm34777	1.16314	0	0.993751	0	0	0	0	0	0	0	0	0	0	0	0	0	0	0	0	0
Stard3nl	1.1593	0	0.671889	0	0	0	0	0	0	0	0	0	0	0	0	0	0	0	0	0
Rpl26	1.15894	0	0	0	0	0	0	0	0	0	0	0	0	0	0	-0.649634	0	0	0	0
Ciao2a	1.15239	0	0.729775	0	0	0	0	0	0	0	0	0	0	0	0	0	0	0	0	0
Rpl39	1.15181	0	0	0	0	-0.723361	0	0	0	0	0	0	0	0	0	-0.687657	0	0	0	0
Mthfsl	1.15069	0	0.820156	0	0	0	0	0	0	0	0	0	0	0	0	0	0	0	0	0
Gm12231	1.14865	0	1.0783	0	0	0	0	0	0	0	0	0	0	0	0	0	0	0	0	0
4430402I18Rik	1.14815	0	0.928492	-0.763254	0	0	0	0	0	0	0	-0.669155	0	0	0	0	0	0	0	0
Cebpzos	1.14648	0	0.806168	0	0	0	0	0	0	0	0	0	0	0	0	0	0	0	0	0
Gm20257	1.14446	0	0	0	0	0	0	0	0	0	0	0	0	0	0	0	0	0	0	0
Sult2a1	1.14434	-1.66982	0	-11.3932	0	0	-1.05559	1.36697	0.626422	-0.965885	0	0	0	0	0	0	0	0	0	0
Gm6863	1.14377	0	1.06192	0	0	0	0	0	0	0	0	0	0	0	0	0	0	0	0	0
BC028528	1.14367	-0.645034	0	-1.00561	0	0	0	0	0	0	0	0	0	0	0	-0.791463	0	0	0	0
Rps18-ps3	1.14337	0	1.38039	0	0	0	0	0	0	0	0	0	0	0	0	0	0	0	0	0
Gm11843	1.14317	0	0	0	0	0	0	0	0	0	0	0	0	0	0	0	0	0	0	0
Rack1	1.14236	0	0.638448	-0.633097	0	0	0	0	0	0	0	0	0	0	0	-0.646869	0	0	0	0
Apoa4	1.14224	1.45858	0	1.62315	0	0	0	0.756287	0	0	0	0	0	0	0	0	0	0	0	0
Ighm	1.14036	0	0.895455	0	0	0	0	0	0	0	0	0	0	0	0	0	0	0	0	0
Scarna6	1.13972	0	1.24825	0	0	0	0	0	0	0	0	0	0	0	0	0	0	0	0	0
Cd9	1.13868	0	0.791038	0	0	0	0	-0.607801	0	0	0	0	0	0	0	0	0	0	0	0
Gnpnat1	1.13729	0	0.639589	0	0	0	0	0	0	0	0	0	0	0	0	-0.640516	0	0	0	0
Mthfd2l	1.13707	-0.770948	0.682515	-0.699161	0	0	0	0	0	0	0	0	0	0	0	0	0	0	0	0
Lyz2	1.13625	0.660033	0	0	0	-0.640721	-0.813734	0	0	0	0.670104	0	0	0	0	-0.645876	0	0	0	0
AC135964.1	1.13537	0	0	0	0	0	0	0	0	0	0	0	0	0	0	0	0	0	0	0
Gm25117	1.13521	0	1.02112	0	0	0	0	0	0	0	0	0	0	0	0	0	0	0	0	0
L3hypdh	1.1303	0	1.01996	0	0	0	0	0	0	0	0	0	0	0	0	0	0	0	0	0
Sytl5	1.13013	0	0	0	0	0	0	0	0	0	0	0	0	0	0	0	0	0	0	0
Rpa3	1.12948	0	0.945505	-0.756399	0	0	0	0	0	-0.639884	0	0	0	0	0	-0.842546	0	0	0	0
Gm10275	1.12456	0	0.674533	0	0	0	0	0	0	0	0	0	0	0	0	0	0	0	0	0
Ifi27l2a	1.12205	0	0	-0.735188	0	-0.803934	-0.811036	0.812753	0	0	0	0.631734	0	0	0	-0.901536	0	0	0	0
Snrnp27	1.12138	0	0.837604	0	0	0	0	0	0	0	0	0	0	0	0	0	0	0	0	0
Rps27l	1.11845	0	0.654684	0	0	0	0	0	0	0	0	0	0	0	0	0	0	0	0	0
Gm8355	1.11708	0	0.88122	0	0	0	0	0	0	0	0	0	0	0	0	0	0	0	0	0
2810001G20Rik	1.11566	0	0.79416	0	0	0	0	0	0	0	0	0	0	0	0	0	0	0	0	0
Atp6v1g1	1.11279	0	0.882188	0	0	0	0	0	0	0	0	0	0	0	0	0	0	0	0	0
Gm14305	1.11149	0	0	0	0	0	0	0	0	0	0	0	0	0	0	-0.734993	0	0	0	0
Btf3	1.10993	0	0.933353	0	0	0	0	0	0	0	0	0	0	0	0	0	0	0	0	0
C1d	1.10813	0	0.773523	0	0	0	0	0	0	0	0	0	0	0	0	0	0	0	0	0
Rad51b	1.10789	0.744321	0.796669	-2.16383	0.737994	0	0	0.64684	0.847645	0	0	0	0	0	0.821386	0	0	0	0	0
Selenof	1.10691	0	0.751588	0	0	0	0	0	0	0	0	0	0	0	0	0	0	0	0	0
Uqcrh	1.10649	0	0	0	0	0	0	0	0	0	0	0	0	0	0	0	0	0	0	0
Iqcg	1.10555	-0.688154	0.653263	-1.09031	0	0	0	0	0	0	0	0	0	0	0	0	0.612657	0	0	0
Cox7c	1.10124	0	0.785298	0	0	0	0	0	0	0	0	0	0	0	0	0	0	0	0	0
Sult2a2	1.10102	-0.731228	0	-10.8241	0	0	-1.59542	0.853238	0.617949	0	0	0	0	0	0	0	0	0	0	0
Cd3d	1.0994	0	0	0	0	0	0	0	0	0	0	0	0	0	0	0	0	0	0	0
Gm32468	1.09866	0	0	0	0	0	0	0	0	0	0	0	0	0	0	0	0	0	0	0
Gm28086	1.09782	0	0	0	0	0	0	0	0	0	0	0	0	0	0	0	0	0	0	0
Mettl23	1.09582	0	0.592076	0	0	0	0	0	0	0	0	0	0	0	0	-0.613282	0	0	0	0
Cd1d2	1.09379	0	0	0	0	0	0	0	0	0	0	0	0	0	0	0	0	0	0	0
Gm40438	1.09371	0	0	0	0	0	0	0	0	0	0	0	0	0	0	0	0	0	0	0
Ndufaf5	1.09167	0	0.593299	0	0	0	0	0	0	0	0	0	0	0	0	0	0	0	0	0
Gm13340	1.09119	0	0.652858	0	0	0	0	0	0	0	0	0	0	0	0	0	0	0	0	0
Rpl13a	1.0907	0	0	0	0	0	0	0	0	0	0	0	0	0	0	-0.881187	0	0	0	0
Gm44787	1.09048	0	0	0	0	0	0	0	0	0	0	0	0	0	0	0	0	0	0	0
Btg3	1.09044	0	0	0	0	0	0	0	0	0	0	0	0	0	0	0	0	0	0	0
1700007L15Rik	1.08832	0	0	0	0	0	0	0	0	0	0	0	0	0	0	0	0	0	0	0
Ran	1.08803	-0.7079	1.03237	-0.735847	0	0	0	0	0	0	0	0	0	0	0	0	0	0	0	0
Rpl32	1.08599	0	0.748651	-0.669376	0	0	0	0	0	0	0	0	0	0	0	0	0	0	0	0
Lncbate1	1.08579	0	0.702294	0	0	0	0	0	0	0	0	0	0	0	0	0	0	0	0	0
Commd2	1.08342	0	0.731791	0	0	0	0	0.624165	0	0	0	0	0	0	0	-0.751451	0	0	0	0
Slc51b	1.08314	-1.85681	0	-2.49286	0	0	0	0	0	0	1.39658	0	0	0	0	0	0	0	0	0
Ccng2	1.08268	0	0.65229	0	0	0	0	0	0	0	0	0	0	0	0	0	0	0	0	0
Igkc	1.08235	0	0.832482	0	0	0	0	0	0	0	0	0	0	0	0	0	0	0	0	0
Commd6	1.08034	0	0.852533	0	0	0	0	0	0	0	0	0	0	0	0	0	0	0	0	0
Gm22442	1.07868	0	1.26564	0	0	0	0	0	0	0	0	0	0	0	0	0	0	0	0	0
Gm25360	1.07764	0	0.784224	0	0	0	0	0	0	0	0	0	0	0	0	0	0	0	0	0
Krt10	1.07754	0	0.721642	0	0	0	0	0	0	0	0	0	0	0	0	0	0	0	0	0
Man2c1os	1.0761	0	0.904461	0	0	0	0	0	0	0	0	0	0	0	0	0	0	0	0	0
Ighg2b	1.07523	0	0	0	0	0	0	0	0	0	0	0	0	0	0	0	0	0	0	0
Hmgb2	1.07511	-2.07025	0	-2.26894	0	0	0	0	0	0	1.42859	0	0	0	0	0	0	0	0	0
Rpain	1.07088	0	1.00341	0	0	0	0	0	0	0	0	0	0	0	0	0	0	0	0	0
A830052D11Rik	1.07068	0	0	0	0	0	0	0	0	0	0	0	0	0	0	0	0	0	0	0
Acyp1	1.07063	0	0.89696	0	0	0	0	0	0	0	0	0	0	0	0	-0.653769	0	0	0	0
Snhg1	1.07023	0	0	0	0	0	0	0	0	0	0	0	0	0	0	0	0	0	0	0
Xlr3a	1.06914	0	0	0	0	0	0	0	0	0	0	1.39697	0	0	0	0	0	0	0	0
Gm11844	1.06879	0	0	0	0	0	0	0	0	0	0	0	0	0	0	0	0	0	0	0
Zap70	1.06827	2.19918	0.69248	2.09198	0	0	0	0	0	0	0	0	0	0.730885	0	-0.921007	0	0	0	0
Sptssa	1.06771	-0.730227	0	-0.688099	0	0	0	0	0	0	0	0	0	0	0	-0.803629	0	0	0	0
6720427I07Rik	1.06745	0	0.968872	0	0	0	0	0	0	0	0	0	0	0	0	0	0	0	0	0
Mpc1-ps	1.06619	0	0.626631	0	0	0	0	0	0	0	0	0	0	0	0	0	0	0	0	0
1110065P20Rik	1.06422	0	0.973242	0	0	0	0	0	0	0	0	0	0	0	0	-0.625517	0	0	0	0
Gm22422	1.0638	0	1.03546	0	0	0	0	0	0	0	0	0	0	0	0	0	0	0	0	0
AI662270	1.06354	0	0	0	0	0	0	0	0	0	0	0	0	0	0	0	0	0	0	0
Trem2	1.0592	0	0	0	0	0	0	0	0	0	1.74141	0	0	0	0	0	0	0	0	0
Mup-ps13	1.05432	0	0.6546	0	0	0	0	0	0	0	0	0	0	0	0	0	0	0	0	0
Bri3	1.053	0	1.20913	0	0	0	0	0	0	0	0	0	0	0	0	0	0	0	0	0
Sft2d1	1.05087	0	0.938202	0	0	0	0	0	0	0	0	0	0	0	0	0	0	0	0	0
Rpsa	1.0489	0	0	0	0	0	0	0	0	0	0	0	0	0	0	-0.609739	0	0	0	0
Gm45083	1.04614	0	0	0	0	0	0	0	0	0	0	0	0	0	0	0	0	0	0	0
Ccl9	1.04409	-0.682165	0	-1.228	0	0	0	0	0	0	0	0	0	0	0	-0.911646	0	0	0	0
Isg15	1.04401	0	0	0	0	0	0	0	0	0	0	0	0	0	0	0	0	0	0	0
Med31	1.044	0	0	0	0	0	0	0	0	0	0	0	0	0	0	-0.615538	0	0	0	0
Ccdc152	1.04391	-2.0508	1.3394	-1.67367	0	0	0	0	0	0	0	0	0	0	0	0	0	0	0	0
Spata24	1.04238	-1.05171	0	0	0	0	0	0	0	0	0	0	0	0	0	-0.760683	0	0	0	0
Gm13203	1.04199	0	0	0	0	0	0	0	0	0	0	0	0	0	0	0	0	0	0	0
9130409I23Rik	1.04172	0	0	2.32524	0	0	0	0	0	0	1.87238	0	0	0	0	0	0.724766	0	0	0
Agbl3	1.04128	0	0.620345	0	0	0	0	0	0	0	0	0	0	0	0	0	0	0	0	0
Gm34667	1.03808	0	0.598911	0	0	0	0	0	0	0	0	0	0	0	0	0	0	0	0	0
Tex12	1.03707	0	1.23002	0	0	0	0	0	0	0	0	0	0	0	0	0	0	0	0	0
Gm4285	1.03701	0	0.755236	0	0	0	0	0	0	0	0	0	0	0	0	0	0	0	0	0
Chrna4	1.03689	-1.77728	-1.05841	-1.36644	0	0	0	0	1.74869	1.25166	0	-1.00778	-1.18177	-1.22822	0	-3.98043	0	0	-1.18066	0
Rps25-ps1	1.03687	0	0.821329	0	0	0	0	0	0	0	0	0	0	0	0	0	0	0	0	0
Dynlt1a	1.03643	-1.29691	0	-1.82099	0	0	0	0	0	0	0	0	0	0	0	0	0	0	0	0
CT027991.1	1.03567	0	0.761022	0	0	0	0	0	0	0	0	0	0	0	0	0	0	0	0	0
Psma7	1.03495	0	0.786648	0	0	0	0	0	0	0	0	0	0	0	0	-0.633791	0	0	0	0
Ccl27a	1.03135	0	0.92622	0	0	0	0	0	0	0	0	0	0	0	0	0	0	0	0	0
Lage3	1.03081	0	0	0	0	0	0	0	0	0	0	0	0	0	0	0	0	0	0	0
Vcpkmt	1.03008	-1.02617	0	-1.25553	0	0	0	0	0	0	1.2973	0	0	0	0	-0.789449	0	0	0	0
3110045C21Rik	1.02757	0	0	0	0	0	0	0	0	0	0	0	0	0	0	0	0	0	0	0
Bvht	1.02562	0	0	0	0	0	0	0	0	0	0	0	0	0	0	0	0	0	0	0
Msmp	1.02478	0	0	0	0	0	0	0	-0.794115	0	0	0	0	0	0	0	0	0	0	0
Tceal9	1.02436	-1.27161	0	-1.30735	0	0	0	0	0	0	0.95465	0	0	0	0	-0.602959	0	0	0	0
Ccdc90b	1.02395	0	0	0	0	0	0	0.609166	0	0	0	0	0	0	0	0	0	0	0	0
Rpl15	1.02317	0	0	0	0	0	0	0	0	0	0	0	0	0	0	-0.593127	0	0	0	0
Fam19a2	1.02293	0	0	0	0	0	0	0	0	0	0	0	0	0	0	0	0	0	0	0
Gm36028	1.02245	0.67229	1.00766	0.990076	0	0	0	0	0	0	0	0	0	0	0	0	0	0	0	0
Rps15	1.02155	0	0.725047	0	0	0	0	0	0	0	0	0	0	0	0	0	0	0	0	0
Slpi	1.01993	0	0	0	0	0	0	0	0	0	2.35406	0	1.1647	0	0	0	0.905842	0	0	0
Eef1b2	1.01823	0	0.626997	0	0	0	0	0	0	0	0	0	0	0	0	0	0	0	0	0
Defb1	1.0178	-1.75223	0	-2.89071	0.891035	0	0	0	0	0	0	0	0	0	0	0	0	0	0	0
Rpl13	1.01609	0	0.656317	0	0	0	0	0	0	0	0	0	0	0	0	0	0	0	0	0
Ccl2	1.01564	0	0	0	0	0	0	0	0	0	0	0	0	0	0	0	0	0	0	0
Tmem256	1.01497	0	0.742953	0	0	-0.747796	0	0	0	0	0	0	0	0	0	-0.836922	0	0	0	0
Arl4a	1.01346	0	0.66373	0	0	0	0	0.629223	0	0	0	0.961293	0	0	0	0.629175	0	0	-0.634996	0
Ndufaf2	1.01344	0	0.926034	0	0	0	0	0	0	0	0	0	0	0	0	0	0	0	0	0
Psma3	1.01329	0	0.607134	0	0	0	0	0	0	0	0	0	0	0	0	0	0	0	0	0
Zfand4	1.01305	0	0.677505	0	0	0	0	0	0	0	0	0	0	0	0	0	0	0	0	0
Atp5e	1.01253	0	0.745885	0	0	0	0	0	0	0	0	0	0	0	0	0	0	0	0	0
Avpi1	1.01202	0	0.72878	0	0	0	0	0	0	0	0	0	0	0	0	-1.06676	0	0	0	0
Sms	1.0118	0	0.700891	0	0	0	0	0	0	0	0	0	0	0	0	0	0	0	0	0
Tpt1	1.01076	0	0	0	0	0	0	0	0	0	0	0	0	0	0	0	0	0	0	0
Mpc1	1.0103	0	0.758477	0	0	0	0	0	0	0	0	0	0	0	0	0	0	0	0	0
1810022K09Rik	1.01	0	0	0	0	0	0	0	0	0	0	0	0	0	0	0	0	0	0	0
Rps27	1.00902	0	0	0	0	0	0	0	0	0	0	0	0	0	0	-0.656988	0	0	0	0
Bc1	1.00891	0	0	0	0	0	0	0	0	0	0	0	0	0	0	0	0	0	0	0
Gm20939	1.00846	0	0	0	0	0	0	0	0	0	0	0	0	0	0	0	0	0	0	0
Pet100	1.0079	0	0.598509	0	0	0	0	0	0	0	0	0	0	0	0	0	0	0	0	0
Cyp3a41b	1.00667	2.8528	0	0	0	1.03942	0	5.10605	1.08441	0	-2.71096	1.14966	0	0	0	0	0	0	0	0
Pts	1.00385	0	0.703452	0	0	0	0	0	0	0	0	0	0	0	0	0	0	0	0	0
Clec4n	1.00317	-0.713275	0	-0.925647	0	0	0	0	0	0	0	0	0	0	0	-0.719679	0	0	0	0
Sumo2	1.00168	0	0	0	0	0	0	0	0	0	0	0	0	0	0	0	0	0	0	0
Snrpe	1.00045	0	0	0	0	0	0	0	0	0	0	0	0	0	0	0	0	0	0	0
Dnajc19	0.999958	0	0.606723	0	0	0	0	0	0	0	0	0	0	0	0	0	0	0	0	0
2310040G24Rik	0.999665	0	0	0	0	0	0	0	0	0	0	0	0	0	0	0	0	0	0	0
Gm14586	0.999413	0	0	0	0	0	0	0	0	0	0	0	0	0	0	0	0	0	0	0
S100a1	0.998382	0	0.691732	0	0	0	0	0	0	0	0	0	0	0	0	0	0	0	0	0
Gm9512	0.99532	0	0	0	0	0	0	0	0	0	0	0	0	0	0	0	0	0	0	0
Mrpl14	0.992551	0	0.952094	0	0	0	0	0	0	0	0	0	0	0	0	-0.617781	0	0	0	0
Rplp0	0.991356	0	0.79079	-0.642573	0	0	0	0	0	0	0	0	0	0	0	0	0	0	0	0
Psmd10	0.989976	0	0.681561	0	0	0	0	0	0	0	0	0	0	0	0	0	0	0	0	0
Ccdc115	0.989391	0	0.923895	0	0	0	0	0	0	0	0	0	0	0	0	0	0	0	0	0
Rps15a	0.988056	0	0	0	0	0	0	0	0	0	0	0	0	0	0	-0.639854	0	0	0	0
Pkib	0.987611	0	0	0	0	0	0	0	0	0	1.15236	0	0	0	0	0	0	0	0	0
Cdc26	0.986103	0	0	0	0	0	0	0	0	0	0	0	0	0	0	0	0	0	0	0
Dusp12	0.985949	0	0.587671	0	0	0	0	0.603203	0	0	0	0	0	0	0	0	0	0	0	0
Prorsd1	0.984435	0	0.795319	0	0	0	0	0	0	0	0	0	0	0	0	0	0	0	0	0
Ppp1r3c	0.983195	0	1.28765	0	0	0	0	0	0	0	-0.634411	0	0	-0.806349	0	2.29015	0	0	0	0
Itgb3bp	0.982353	0	0	0	0	0	0	0.590488	0	0	0	0	0	0	0	-0.63098	0	0	0	0
Gm20559	0.981334	0	0	0	0	0	0	0	0	0	0	0	0	0	0	0	0	0	0	0
BC051226	0.981254	0	0.855332	0	0	0	0	0	0	0	0	0	0	0	0	0	0	0	0	0
Cklf	0.979607	-0.761916	0	-0.966215	0	0	0	0	0	0	0	0	0	0	0	0	0	0	0	0
Siva1	0.979435	0	0	0	0	0	0	0	0	0	0	0	0	0	0	-1.25909	0	0	0	0
9030616G12Rik	0.978767	0	0.795721	0	0	0	0	0	0	0	0	0	0	0	0	0	0	0	0	0
Gabarapl2	0.978194	0	0.932835	0	0	0	0	0	0	0	0	0	0	0	0	0	0	0	0	0
Tstd1	0.977034	0	0	0	0	0	0	0.609428	0	0	0	0	0	0	0	-0.756066	0	0	0	0
Ppia	0.976791	0	0	0	0	0	0	0	0	0	0	0	0	0	0	0	0	0	0	0
Tmsb4x	0.974481	0	0	-0.671184	0	0	0	0	0	0	0	0	0	0	0	-0.915773	0	0	0	0
Oxld1	0.97273	0	0.752193	0	0	0	0	0	0	0	0	0	0	0	0	-0.823878	0	0	0	0
Guk1	0.972167	0	0.844202	0.659851	0	0	0	0	0	0	0	0	0	0	0	0	0	0	0	0
Zfp53	0.970737	0	0.783713	0	0	0	0	0	0	0	0	0	0	0	0	0	0	0	0	0
Osbpl3	0.968839	0.588716	0	2.60804	0	0	0	0	0	0	2.09266	0	1.16488	0	0	0	1.60553	0	1.1935	0.920745
Dntt	0.96802	2.47433	0	1.87081	0	0	0	1.63882	0	0.680636	0	0.711919	0	0	0	-0.728355	0	0	0	0
Mtln	0.967799	0	0	0	0	0	0	0	0	0	0	0	0	0	0	-0.615499	0	0	0	0
A930001C03Rik	0.967488	0	0.917913	0	0	0	0	0	0	0	0	0	0	0	0	0	0	0	0	0
Mrpl41	0.966463	0	0.798998	0	0	0	0	0	0	0	0	0	0	0	0	0	0	0	0	0
9130230N09Rik	0.965989	0	0	0	0	0	0	0	0	0	0	0	0	0	0	0	0	0	0	0
Tmem242	0.965829	0	0.588121	0	0	0	0	0	0	0	0	0	0	0	0	-0.605407	0	0	0	0
Snhg6	0.965536	0	0	0	0	0	0	0	0	0	0	0	0	0	0	0	0	0	0	0
Gtf2a2	0.96487	0	0.776018	0	0	0	0	0	0	0	0	0	0	0	0	0	0	0	0	0.590354
Ap3s1	0.964807	0	0.885401	0	0	0	0	0	0	0	0	0	0	0	0	0	0	0	0	0
Lrrc24	0.963987	0	0	0	0	0	0	0	0	1.17957	0	0	0	0	0	0	0	0	0	0
Zfp950	0.963482	0	0	0	0	0	0	0	0	0	0.725743	0	0	0	0	-0.661691	0	0	0	0
Selenok	0.963172	0	0.62001	0	0	0	0	0	0	0	0	0	0	0	0	0	0	0	0	0
Gngt1	0.960487	0	0	0	0	0	0	0	0	0	0	0	0	0	0	0	1.08323	0	0	0
Vbp1	0.960122	0	0.600968	-0.707699	0	0	0	0	0	0	0	0	0	0	0	0	0	0	0	0
Gm12354	0.960031	0	0	0	0	0	0	0	0	0	0	0	0	0	0	0	0	0	0	0
Saa3	0.959904	0	0	1.9339	0	-1.57585	0	0	0	0	0	0	0	2.36027	1.01703	-1.41077	-0.664793	0.780009	0	2.9796
Gm26448	0.959561	0	0.859787	0	0	0	0	0	0	0	0	0	0	0	0	0	0	0	0	0
Tmem141	0.959205	0	0.70075	0	0	0	0	0	0	0	0	0	0	0	0	-0.640208	0	0	0	0
Cyba	0.958855	0	0	-1.03373	0	0	0	0	0	0	0	0	0	0	0	-0.79128	0	0	0	0
Uqcc2	0.958782	0	0.608823	0	0	0	0	0	0	0	0	0	0	0	0	0	0	0	0	0
Camk1	0.957819	0	0.819601	0	0	0	0	0	0	0	0	0	0	0	0	-0.799792	0	0	0	0
Cks2	0.957543	-0.631409	0.638815	-0.679691	0	0	0	0	0	0	0	0	0	0	0	-0.659717	0	0	0	0
Mrpl33	0.957345	0	0.585242	0	0	0	0	0	0	0	0	0	0	0	0	0	0	0	0	0
Uba52	0.955395	0	1.12096	-0.825411	0	0	0	0	0	0	0	0	0	0	0	0	0	0	0	0
Fasn	0.952695	0	0	0	0	0	0	0	0	0.750851	-0.632457	0	0	0	0	-0.953768	0	0	0	0
Cd83	0.951954	0	0	-0.972927	0	0	0	0	0.634827	0	0	0	0	0	0	-1.54616	0	0	0	0
Pigyl	0.951698	0	0.81457	0	0	0	0	0	0	0	0	0	0	0	0	-0.658997	0	0	0	0
Serpinb6a	0.951053	0	0	-0.907566	0	0	-0.677653	0	0	0	0	0	0	0	0	0	0	0	0	0
Rpl36a	0.950347	0	0	0	0	0	0	0	0	0	0	0	0	0	0	-0.683367	0	0	0	0
Fopnl	0.949599	0	0.733052	0	0	0	0	0	0	0	0	0	0	0	0	0	0	0	0	0
Hectd2os	0.947179	0	1.26298	0	0	0	0	0	0	0	0	0	0	0	0	0	0	0	0	0
Snrpd2	0.946077	0	0.619891	0	0	0	0	0	0	0	0	0	0	0	0	-0.761412	0	0	0	0
Acss2	0.945462	0	0	0	0	0	0	0	0	0	-1.09415	0	-0.915963	-0.742825	0	-0.858011	0	0	0	0
Mien1	0.945377	0	0.642416	0	0	0	0	0	0	0	0	0	0	0	0	0	0	0	0	0
AC132455.2	0.94425	0	0.673613	0	0	0	0	0	0	0	0	0	0	0	0	0	0	0	0	0
Zfp54	0.941811	0	0	0	0	0	0	0	0	0	0	0	0	0	0	-0.700545	0	0	0	0
Abracl	0.941263	0	0	0	0	0	0	0	0	0	0	0	0	0	0	0	0	0	0	0
Taf1d	0.940746	0	0.751183	0	0	0	0	0.625191	0	0	0.793788	0	0	0	0	0	0	0	0.693245	0
Bcl2l14	0.939766	0	0	0	0	0	0	0	0	0	1.47157	0	0	0	0	0	0	0	0	0
Trnau1ap	0.939765	0	0	0	0	0	0	0	0	0	0	0	0	0	0	-0.731438	0	0	0	0
C330013E15Rik	0.937477	0	0.883307	0	0	0	0	0	0	0	0	0	0	0	0	0	0	0	0	0
Gm15417	0.937343	0	0.816079	0	0	0	0	0	0	0	0	0	0	0	0	0	0	0	0	0
Tyw5	0.936057	0	0.612529	0	0	0	0	0	0	0	0	0	0	0	0	-0.734457	0	0	0	0
Smim26	0.935064	0	0	0	0	0	0	0	0	0	0	0	0	0	0	-0.592428	0	0	0	0
4930522L14Rik	0.932681	0	0.69115	0	0	0	0	0	0	0	0	0	0	0	0	0	0	0	0	0
Ppil1	0.931559	-0.718518	0.716206	-0.729511	0	0	0	0	0	0	0	0	0	0	0	0	0	0	0	0
Zfand1	0.929996	0	0	0	0	0	0	0	0	0	0	0	0	0	0	0	0	0	0	0
Rps11	0.928871	0	0.610923	0	0	0	0	0	0	0	0	0	0	0	0	0	0	0	0	0
Itgae	0.928699	0	0	0	0	0	0	0	0	0	0	0	0	0	0	0	0	0	0	0
Itgb1bp1	0.927532	0	0	0	0	0	0	0	0	0	0	0	0	0	0	-0.593294	0	0	0	0
Gm12265	0.927359	0	1.12437	0	0	0	0	0	0	0	0	0	0	0	0	0	0	0	0	0
Gngt2	0.924766	0	0	0	0	0	0	0	0	0	0	0	0	0	0	0	0	0	0	0
Atp6v0b	0.923357	0	0.748484	0	0	0	0	0	0	0	0	0	0	0	0	-0.588073	0	0	0	0
2510046G10Rik	0.923138	0	0.792943	0	0	0	0	0	0	0	0	0	0	0	0	0	0	0	0	0
Nit2	0.92281	0	0.696414	0	0	0	0	0	0	0	0	0	0	0	0	-0.587278	0	0	0	0
Gm12909	0.922428	0	0.751355	0	0	0	0	0	0	0	0	0	0	0	0	0	0	0	0	0
Cd59a	0.922231	0	0.917479	0	0	0	0	0	0	0	0	0	0	0	0	0	0	0	0	0
Hnf4aos	0.921612	0	0.846451	0	0	0	0	0	0	0	0	0	0	0	0	0	0	0	0	0
Ift20	0.920548	0	0.759709	0	0	0	0	0	0	0	0	0	0	0	0	0	0	0	0	0
Atpif1	0.918742	-0.689447	0	-1.1532	0	0	0	0	0	0	0	0	0	0	0	0	0	0	0	0
Dpt	0.918525	0	0	0	0	0	0	0	0	0	2.10817	0	0.771439	0	0	0	0	0	0	0
Prelid2	0.91801	1.94332	0	0	0	0	0	0	0	0	1.05911	0	0	0	0	0	0	0	0	0
Gm43189	0.914794	0	0.847629	0	0	0	0	0	0	0	0	0	0	0	0	0	0	0	0	0
Snhg15	0.91381	0	0	0	0	0	0	0	0	0	0	0	0	0	0	0	0	0	0	0
Mzt1	0.912726	0	0.725522	0	0	0	0	0	0	0	0	0	0	0	0	0	0	0	0	0
Sat1	0.912155	0	0	0	0	0	0	0	0	0	0	0	0	0	0	0	0	0	0	0
Gm49494	0.909989	0	0	0	0	0	0	0	0	0	0	0	0	0	0	0	0	0	0	0
Ltb	0.909658	0	0	-0.720963	0	0	0	0	0	0	1.29956	0	0	0	0	0	0	0	0	0
AC117239.2	0.908322	0	0	0	0	0	0	0	0	0	0	0	0	0	0	0	0	0	0	0
Idi1	0.907825	-0.614417	0	0	0	0	1.10702	1.58854	0	0	-0.590519	0	-0.950064	0	0	0	0	0	0	0
Cox7a1	0.907458	-0.587073	0	-0.771174	0	0	0	0	0	0	0	0	0	0	0	-1.52611	0	0	0	0
Gm12338	0.907175	0	0.712661	0	0	0	0	0	0	0	0	0	0	0	0	0	0	0	0	0
Uqcr10	0.906489	0	0.640536	0	0	0	0	0	0	0	0	0	0	0	0	0	0	0	0	0
Timm8b	0.905864	0	0	0	0	0	0	0	0	0	0	0	0	0	0	0	0	0	0	0
Npnt	0.905397	-2.08632	0	-2.23475	0	0	0	0	0	0	0	0	0	0	0	0	0	0	0	0
Rwdd1	0.904913	0	0.732169	0	0	0	0	0	0	0	0	0	0	0	0	0	0	0	0	0
AV026068	0.904404	0	0	0	0	0	0	0	0	0	0	0	0	0	0	0	0	0	0	0
1810037I17Rik	0.903691	0	0	0	0	0	0	0	0	0	0	0	0	0	0	0	0	0	0	0
Cox14	0.903461	0	0.6146	0	0	0	0	0	0	0	0	0	0	0	0	0	0	0	0	0
Rpl14	0.903239	0	0.628077	0	0	0	0	0	0	0	0	0	0	0	0	0	0	0	0	0
B3galnt1	0.90316	-0.894672	1.01716	-1.02488	0	0	0	0	0	0	0	0	0	0	0	0	0	0	0	0
Gmfg	0.902006	0	0	0	0	0	0	0	0	0	0	0	0	0	0	0	0	0	0	0
Cx3cr1	0.901798	0	0	0	0	0	0	0	0	0	1.72615	0	1.58484	0	0	0	0	0	0	0
Fst	0.901094	-0.883847	0	0	0	0	0	0	0	0	0	0.696314	0	0	0	-1.84627	0	0	0	-1.2131
mt-Tp	0.900467	0	1.04845	0	0	0	0	0	0	0	0	0	0	0	0	0	0	0	0	0
1600020E01Rik	0.900364	0	0.672315	0	0	0	0	0	0	0	0	0	0	0	0	0	0	0	0	0
Rpl3	0.900254	0	0.608074	-0.72464	0	0	0	0	0	0	0	0	0	0	0	0	0	0	0	0
Hddc2	0.899732	-0.659299	0	-0.878302	0	0	0	0	0	0	0	0	0	0	0	-0.742403	0	0	0	0
Glrx3	0.899452	0	0	0	0	0	0	0	0	0	0	0	0	0	0	0	0	0	0	0
Tsen15	0.89914	0	0	0	0	0	0	0	0	0	0	0	0	0	0	0	0	0	0	0
Wfdc21	0.898582	3.09459	0	3.07343	0	-0.709535	0	0.825529	0	0	-1.08796	0	0	0	0	0	0	0	0	0
Dpy30	0.896905	0	0	0	0	0	0	0	0	0	0	0	0	0	0	0	0	0	0	0
Gm16035	0.89583	0	0	0	0	0	0	0	0	0	0	0	0	0	0	0	0	0	0	0
Ppp1r35	0.895502	0	0.764605	0	0	0	0	0	0	0	0	0	0	0	0	0	0.602432	0	0	0
Gm42067	0.895312	0	0.764062	0	0	0	0	0	0	0	0	0	0	0	0	0	0	0	0	0
Cox16	0.895125	0	0	0	0	0	0	0	0	0	0	0	0	0	0	0	0	0	0	0
Tomm40l	0.892682	-0.742013	0	0	0	0	0	0	0	0	0	0	0	0	0	-1.0707	0	0	0	0
Gm14325	0.891812	0	0	0.741814	0	0	0	0	0	0	0	0	0	0	0	-0.621402	0	0	0	0
2610306M01Rik	0.891514	0	0.676179	0	0	0	0	0	0	0	0	0	0	0	0	0	0	0	0	0
Sec61b	0.890057	0	0	0	0	0	0	0	0	0	0	0	0	0	0	-0.779782	0	0	0	0
9430038I01Rik	0.889927	0	0.828678	0	0	0	0	0	0	0	0	0	0	0	0	0	0	0	0	0
Coa6	0.889696	0	0.649219	0	0	0	0	0.720997	0	0	0	0	0	0	0	0	0	0	0	0
Gm10095	0.887787	0	0.649881	0	0	0	0	0	0	0	0	0	0	0	0	0	0	0	0	0
Vps29	0.885819	0	0	0	0	0	0	0	0	0	0	0	0	0	0	0	0	0	0	0
Uqcr11	0.885344	0	0.684197	0	0	0	0	0	0	0	0	0	0	0	0	0	0	0	0	0
Stap1	0.885136	0	0	0	0	0	0	2.10093	0	0	1.15309	0	0	0	0	0	1.0866	0	0	0
S100a10	0.885035	0.860677	0	1.12984	0	0	0	0.726288	0	0.668714	0	0	0	0	0	0	0	0	0	0
Gm11478	0.885006	0	0	0	0	0	0	0	0	0	0	0	0	0	0	0	0	0	0	0
Sumo1	0.883765	0	0	0	0	0	0	0	0	0	0	0	0	0	0	0	0	0	0	0
Tmem208	0.883352	0	0	0	0	0	0	0	0	0	0	0	0	0	0	-0.644737	0	0	0	0
Acly	0.88286	-0.718524	0	0	0	0	0	0	0	0	0	0	0	0	0	-0.912656	0	0	0	0
Eef1a1	0.882701	0	0.844438	0	0	0	0	0	0	0	0	0	0	0	0	0	0	0	0	0
Rnf125	0.882698	-0.768762	1.03838	0	0	0	0	0	0	0	0	0	0	0	0	0	0	0	-0.629895	0
Tbca	0.881839	0	0	0	0	0	0	0	0	0	0	0	0	0	0	0	0	0	0	0
Gm10250	0.881507	0	0	0	0	0	0	0	0	0	0	0	0	0	0	0	0	0	0	0
Gm12166	0.881388	0	0.659185	0	0	0	0	0	0	0	0	0	0	0	0	0	0	0	0	0
Zfp971	0.879723	0	0	0	0	0	0	0	0	0	0	0	0	0	0	0	0	0	0	0
Spc24	0.879273	-0.805195	0.767938	0	0	0	0	0	0	0	0.898179	0	0	0	0	0	0.719082	0	0	0
Eif3h	0.877519	0	0.616684	0	0	0	0	0	0	0	0	0	0	0	0	0	0	0	0	0
Pcbd2	0.877124	0	0.836292	0	0	0	0	0	0	0	0	0	0	0	0	0	0	0	0	0
Ttc32	0.876897	0	0	0	0	0	0	0	0	0	0	0	0	0	0	-0.629353	0	0	0	0
Gm15446	0.876044	0	0	0	0	0	0	0	0	0	0	0	0	0	0	0	0	0	0	0
Gm14295	0.875416	0	0	0	0	0	0	0.694667	0	0	0	0	0	0	0	0	0	0	0	0
Bola2	0.875278	0	0	0	0	0	0	0	0	0	0	0	0	0	0	0	0	0	0	0
Rpl39-ps	0.875268	0	0	0	0	0	0	0	0	0	0	0	0	0	0	0	0	0	0	0
A730063M14Rik	0.875178	0	0	0	0	0	0	0	0	0	0	0	0	0	0	0	0	0	0	0
Oas1a	0.874672	0	0	0	0	0	0	0	0	0	0	0	0	0	0	0	0	0	0	0
Gm6210	0.872186	0	0	0	0	0	0	0	0	0	0	0	0	0	0	0	0	0	0	0
Minos1	0.872141	0	0	0	0	0	0	0	0	0	0	0	0	0	0	0	0	0	0	0
Dtymk	0.871285	-0.816479	0.738257	-0.874734	0	0	0	0	0	0	0	0	0	0	0	0	0	0	0	0
Pin4	0.871181	0	0.695547	0	0	0	0	0	0	0	0	0	0	0	0	0	0	0	0	0
Rmdn1	0.870578	0	0.596623	0	0	0	0	0	0	0	0	0	0	0	0	0	0	0	0	0
Pstpip2	0.870325	0	0	0	0	0	0	0	0	0	0	0	0	0	0	0	0	0	0	0
Gm12191	0.869149	0	0	0	0	0	0	0	0	0	0	0	0	0	0	0	0	0	0	0
Dph3	0.866665	0	0	0	0	0	0	0	0	0	0	0	0	0	0	0	0	0	0	0
Pam16	0.865977	0	0.679425	0	0	0	0	0	0	0	0	0	0	0	0	0	0	0	0	0
Zfp947	0.865469	0	0	0	0	0	0	0.972422	0	0	0	0	0	0	0	0	0	0	0	0
Vmo1	0.864552	0	0.908679	0.879764	0	0	0	0	0	0	0	0	0	0	0	-0.979785	0	0	0	0
Gm3787	0.864468	0	0	0	0	0	0	0	0	0	0	0	0	0	0	0	0	0	0	0
Triap1	0.863504	0	0.754979	0	0	0	0	0	0	0	0	0	0	0	0	0	0	0	0	0
Cetn3	0.862685	0	0	0	0	0	0	0	0	0	0	0	0	0	0	-0.589286	0	0	0	0
Slfn2	0.86259	0	0	-0.925591	0	0	0	0	0	0	0	0	0	0	0	0	0	0	0	0
Psmg4	0.862226	0	0	0	0	0	0	0	0	0	0	0	0	0	0	0	0	0	0	0
AU041133	0.861726	0	0	0	0	0	0	0.889561	0	0	0	0	0	0	0	0	0	0	0	0
Dbi	0.861225	0	0	0	0	0	0	0	0	0	0	0	0	0	0	0	0	0	0	0
Wfdc2	0.861002	0	1.05519	0	0	-0.908049	0	0	0	0	0	0	0	0	0	0	0.659205	0	0	0
S100a6	0.860587	0	0	-0.623286	0	0	0	0	0	0	1.06584	0	1.02936	0	0	-0.587735	0	0	0	0
Terc	0.859026	0	1.46061	0	0	0	0	0	0	0	0	0	0	0	0	0	0	0	0	0
4632427E13Rik	0.858899	0	1.17742	0	0	0	0	0	0	0	0	0	0	0	0	0	0	0	0	0
Gm36738	0.858775	0	0	0	0	0	0	0	0	0	0	0	0	0	0	0	0	0	0	0
Id4	0.85797	1.23748	0	0	0	0	0	0	-1.03833	0	0	0	0	0	0	0	0	0	0	0
Gale	0.857969	-1.24004	0	-0.599331	0	0	0.739272	0	0	0.830659	0	0	0	0	0	-1.00614	0	0	0	0
Serpina7	0.857861	0	0.689889	0	0	0	0	0	0.642901	0	0	0	0	0	0.921361	0	0	0.75652	0	0
Lag3	0.856336	0	0.599877	1.91216	0	0	0	0	0	0	0	0	0	0	0	0	0	0	0	0
Mrpl46	0.855959	0	0.696636	0	0	0	0	0	0	0	0	0	0	0	0	0	0	0	0	0
Naa20	0.855889	0	0	0	0	0	0	0	0	0	0	0	0	0	0	-0.614296	0	0	0	0
Igf1os	0.85537	0	0	0	0	0	0	0	0	0	0	0	0	0	0	0	0	0	0	0
Gm12174	0.853835	0	0	0	0	0	0	0	0	0	0	0	0	0	0	0	0	0	0	0
Zfp932	0.85341	0	0	0	0	0	0	0	0	0	0	0	0	0	0	-0.695744	0	0	0	0
Gm40040	0.852392	0	0.727587	0	0	0	0	0	0	0	0	0	0	0	0	0	0	0	0	0
Rpl22	0.852022	0	0	0	0	0	0	0	0	0	0	0	0	0	0	0	0	0	0	0
Mmp27	0.851126	0	0	0	0	0	0	0	0	0	0	0	0	0	0	0	0	0	0	0
Tmem126a	0.851093	0	0.622459	0	0	0	0	0	0	0	0	0	0	0	0	0	0	0	0	0
Hint3	0.850625	0	0	0	0	0	0	0	0	0	0	0	0	0	0	0	0	0	0	0
Ormdl1	0.849912	0	0.64316	0	0	0	0	0	0	0	0	0	0	0	0	-0.586982	0	0	0	0
Trmt9b	0.849691	-0.773623	0	0	0	0	0	0	0	0	0	0.591715	0	0	0	0	0	0	0	0
A430005L14Rik	0.849451	0	0.758838	0	0	0	0	0	0	0	0	0	0	0	0	0	0	0	0	0
Serf2	0.846245	0	0.658589	0	0	0	0	0	0	0	0	0	0	0	0	0	0	0	0	0
S100a9	0.84615	-1.47686	0	-1.0376	0	0	0	0	0	0	0	0	0	0	0	0	-1.11732	0	0	0.732471
2810403D21Rik	0.845389	0	0	0	0	0	0	0	0	0	0	0	0	0	0	0	0	0	0	0
Nsmce1	0.844887	0	0	0	0	0	0	0	0	0	0	0	0	0	0	0	0	0	0	0
Acot13	0.844043	0	0	0	0	0	0	0	0	0	0	0	0	0	0	-0.621814	0	0	0	0
Epb41l4aos	0.840155	0	0.656366	0	0	0	0	0	0	0	0	0	0	0	0	0	0	0	0	0
Ms4a4c	0.839699	0	0	0	0	0	0	0	0	0	1.13841	0	0	0	0	0	0	0	0	0
Ndufaf6	0.83961	0	0.699164	0	0	0	0	0	0	0	0	0	0	0	0	0	0	0	0	0
Spata22	0.838473	-0.669052	0	0	0	0	0	0	0	0	0	0	0	0	0	-1.11388	0	0	0	0
Nudcd2	0.837291	0	0.631452	0	0	0	0	0	0	0	0	0	0	0	0	0	0	0	0	0
Zfp560	0.836313	0	0	0	0	0	0	0	0	0	0	0	0	0	0	0	0	0	0	0
Gm7808	0.835791	0	0	0	0	0	0	0	0	0	0	0	0	0	0	0	0	0	0	0
Apoo	0.835699	0	0	0	0	0	0	0	0	0	0	0	0	0	0	0	0	0	0	0
Mrpl28	0.83495	0	0.797321	0	0	0	0	0	0	0	0	0	0	0	0	0	0	0	0	0
Gm15408	0.834165	0	0	0	0	0	0	0	0	0	0	0	0	0	0	0	0	0	0	0
Dcun1d5	0.833565	0	0	0	0	0	0	0	0	0	0	0	0	0	0	0	0	0	0	0
Arhgap15	0.833167	0	0	0	0	0	0	0	0	0	0	0	0	0	0	-0.798805	0	0	0	0
Psma5	0.832923	0	0.615336	0	0	0	0	0	0	0	0	0	0	0	0	0	0	0	0	0
Pole4	0.832549	0	0.648519	0	0	0	0	0	0	0	0	0	0	0	0	0	0	0	0	0
Tspan8	0.832463	0	0	0.607387	0	0	0	1.03189	0	0	1.99875	0	1.18165	-1.22684	0	-0.662992	0	0	1.92671	0
Gm11789	0.830575	0	0	0	0	0	0	0	0	0	0	0	0	0	0	0	0	0	0	0
4930524O07Rik	0.829754	0	0.771229	0	0	0	0	0	0	0	0	0	0	0	0	0	0	0	0	0
Tm4sf1	0.829403	0	0	0	0	0	0	0	0	0	0.67998	0	0.877431	0	0	-1.03597	0	0	0	0
Smim3	0.828819	0	0	-1.065	0	0	0	0	0	0	0	0	0	0	0	0	0	0	0	0
Rps13-ps2	0.828624	0	0.861493	0	0	0	0	0	0	0	0	0	0	0	0	0	0	0	0	0
Tex30	0.827616	0	0	0	0	0	0	0	0	0	0	0	0	0	0	-0.778356	0	0	0	0
Rgs10	0.826857	0	0	-0.914035	0	0	0	0	0	0	0	0	0	0	0	-0.588136	0	0	0	0
H2afz	0.826326	0	0	0	0	0	0	0	0	0	0	0	0	0	0	0	0	0	0	0
Phb	0.825782	0	0.718536	0	0	0	0	0	0	0	0	0	0	0	0	0	0	0	0	0
Sec11c	0.825437	0	0	0	0	0	0	0	0	0	0	0	0	0	0	0	0	0	0	0
Gm19619	0.825409	0	0	0	0	0	0	0	0	0	0	0	0	0	0	0	0	0	0	0
Slc22a29	0.825389	-2.33681	0	-4.99809	0	0	0	0	0.886629	0	1.13396	-0.757754	0	0	0	0	0	0	0	0
Bola1	0.824657	0	0.66835	0	0	0	0	0	0	0	0	0	0	0	0	0	0	0	0	0
Nme4	0.824643	-0.745438	0	0	0	0	0	0	0	0	0	0	0	0	0	-1.46081	0	0	0	0
Fam198a	0.823925	0	0	0	0	0	0	0	0	0	0	0	0	0	0	0	0	0	0	0
Nt5c	0.823879	0	0	0	0	0	0	0	0	0	0	0	0	0	0	0	0	0	0	0
2510002D24Rik	0.82387	0	0.63335	0	0	0	0	0	0	0	0	0	0	0	0	-0.593273	0	0	0	0
Hspb11	0.822534	0	0	0	0	0	0	0	0	0	0	0	0	0	0	0	0	0	0	0
Rpsa-ps10	0.821206	0	0	0	0	0	0	0	0	0	0	0	0	0	0	0	0	0	0	0
1010001N08Rik	0.818351	0	0	0	0	0	0	0	0	0	0	0	0	0	0	0	0	0	0	0
Fabp2	0.817817	0	0.620307	0	0	0	0	0.692212	0	0	0	0	0	0	0	0	0.983216	0	0	0
Sdhaf3	0.817794	0	0	0	0	0	0	0	0	0	0	0	0	0	0	0	0	0	0	0
Tuba1a	0.815225	-1.28513	0	-1.61459	0	0	0	0	0	0	0	0	0	0	0	-1.26483	0	0	0	0
Dnajc24	0.814691	0	0	0	0	0	0	0.697334	0	0	0	0	0	0	0	0	0	0	0	0
Cxcl14	0.814614	0	-0.786831	0	0	0	0	0	0	0	0	0	0	1.22943	0	0	-1.05403	0	0	0.994369
Asic5	0.81448	0	0.835655	0	0	0	0	0	0	0	0	0	0	0	0	0	0	0	0	0
Nudt6	0.814455	0	0	0	0	0	0	0	0	0	0	0	0	0	0	0	0	0	0	0
Evi2a	0.813792	0	0	-0.947725	0	0	-1.23245	0	0	0	0	0	0	0	0	0	0	0	0	0
B230307C23Rik	0.812893	0	0	0	0	0	0	0	0	0	0	0	0	0	0	-0.58501	0	0	0	0
Gm4204	0.81287	0	0	0	0	0	0	0	0	0	0	0	0	0	0	0	0	0	0	0
Coq2	0.812399	0	0.611306	0	0	0	0	0	0	0	0	0	0	0	0	0	0	0	0	0
Zfp97	0.812156	0	0	0	0	0	0	0	0	0	0	0	0	0	0	0	0	0	0	0
Pfdn1	0.811751	0	0	0	0	0	0	0	0	0	0	0	0	0	0	0	0	0	0	0
Sf3b6	0.81136	0	0	0	0	0	0	0	0	0	0	0	0	0	0	0	0	0	0	0
Sarnp	0.810906	0	0	0	0	0	0	0	0	0	0	0	0	0	0	0	0	0	0	0
Klra2	0.810031	0	0	0	0	0	0	0	0	0	0	0	0	0	0	-0.936536	0	0	0	0
Pdzk1ip1	0.807913	0	0	0	0	0	0	0	0	0.658006	0	0	0	-0.989816	0	-1.42012	0	0	0	0
Fbxw9	0.807019	-0.661481	0.709502	-0.665705	0	0	0	0	0	0	0	0	0	0	0	0	0	0	0	0
Supt4a	0.806862	0	0	0	0	0	0	0	0	0	0	0	0	0	0	0	0	0	0	0
Fyb2	0.806422	0	0	0.708799	0	0	0	0	0	0	1.08957	0	0	0	0	0	0	0	0	0
Fam213b	0.805808	0	0.652469	0	0	0	0	0	0	0	0	0	0	0	0	0	0	0	0	0
Rab17	0.804978	0	0.74859	0	0	0	0	0	0	0	0	0	0	0	0	0	0	0	0	0
Cxcr6	0.804297	0	0	0	0	0	0	0	0	0	0	0	0	0	0	0	0	0	0	0
Tmem29	0.803198	0	0	0	0	0	0	0	0	0	0	0	0	0	0	-1.02319	0	0	0	0
5430403G16Rik	0.802981	0	0	0	0	0	0	0.878222	0	0	0	0	0	0	0	0	0	0	0	0
Nenf	0.802677	0	0	0	0	0	0	0	0	0	0	0	0	0	0	-0.72952	0	0	0	0
Rpl31-ps8	0.801948	0	0	0	0	0	0	0	0	0	0	0	0	0	0	0	0	0	0	0
Ptprcap	0.801791	0	0	0	0	0	0	0	0	0	1.08564	0	0	0	0	0	0	0	0	0
Mrpl52	0.801499	0	0	0	0	0	0	0	0	0	0	0	0	0	0	0	0	0	0	0
Gm6204	0.801123	0	0	0	0	0	0	0	0	0	0	0	0	0	0	0	0	0	0	0
Npas2	0.801004	0	0	0	1.19616	1.25096	0	0	0	0	-1.25995	3.00304	-1.53165	0	0	0	-0.800696	0	-1.68762	-2.97098
Gdf15	0.800791	0	0.721227	0	0	0	1.28998	0	1.16817	0	0	0	0	0	0	0	0	0	0	0
Eif4a2	0.800349	0	0.641046	0	0	0	0	0	0	0	0	0	0	0	0	0	0	0	0	0
Srp14	0.800307	0	0	0	0	0	0	0	0	0	0	0	0	0	0	0	0	0	0	0
Dpm3	0.800107	0	0	0	0	0	0	0	0	0	0	0	0	0	0	0	0	0	0	0
Gm10033	0.798966	0	0	0	0	0	0	0	0	0	0	0	0	0	0	0	0	0	0	0
Lamtor5	0.797066	0	0	0	0	0	0	0	0	0	0	0	0	0	0	-0.586579	0	0	0	0
Gm5805	0.79705	0	0	0	0	0	0	0	0	0	0	0	0	0	0	0	0	0	0	0
Ccdc107	0.796533	0	0.763067	0	0	0	0	0	0	0	0	0	0	0	0	0	0	0	0	0
Rpl38	0.796132	0	0	0	0	0	0	0	0	0	0	0	0	0	0	-0.775205	0	0	0	0
Med11	0.794046	0	0	0	0	0	0	0	0	0	0	0	0	0	0	0	0	0	0	0
Mea1	0.79184	0	0	0	0	0	0	0	0	0	0	0	0	0	0	0	0	0	0	0
Akr1b3	0.791529	0	0	0	0	0	0	0	0	0	0	0	0	0	0	0	0	0	0	0
Ccdc34	0.790764	-1.84202	0	-1.93427	0	0	0	0	0	0	1.26902	0	0	0	0	0	0	0	0	0
Mrpl57	0.790626	0	0.660615	0	0	0	0	0	0	0	0	0	0	0	0	0	0	0	0	0
Fam174a	0.790423	0	0	0	0	0	0	0	0	0	0	0	0	0	0	0	0	0	0	0
Churc1	0.790217	0	0	0	0	0	0	0	0	0	0	0	0	0	0	0	0	0	0	0
Tmed2	0.789786	0	0.918066	0	0	0	0	0	0	0	0	0	0	0	0	0	0	0	0	0
Chrac1	0.789004	0	0.593937	0	0	0	0	0	0	0	0	0	0	0	0	-0.70904	0	0	0	0
Pla2g12b	0.788887	0	0	0	0	0	0	0	0	0	0	0	0	0	0	0	0	0	0	0
Wnt5b	0.787915	0	0	0	0	0	0	0	0	0	0	0	0	0	0	0	0	0	0	0
1110020A21Rik	0.787253	0	0.609566	0	0	0	0	0	0	0	0	0	0	0	0	0	0	0	0	0
Gm22009	0.78692	0	1.29686	0	0	0	0	0	0	0	0	0	0	0	0	0	0	0	0	0
A230072C01Rik	0.786463	0	0.624969	0	0	0	0	0	0	0	0	0	0	0	0	0	0	0	0	0
mt-Atp6	0.785956	0	0	0	0	1.27355	0	0	0	0	0	0	0	0	0	0	0	0	0	0
Gimap8	0.785907	0	0	-0.960863	0	0	0	0	0	0	0	0	0	0	0	0	0	0	0	0
Akr1c20	0.785838	-0.746441	0.711283	-1.26254	0	0	0	0	0	0	0	0	0	0	0	0	0	0	0	0
Gm10451	0.785706	0	0	0	0	0	0	0	0	0	0	0	0	0	0	0	0	0	0	0
Eif2s2	0.785327	0	0.657902	0	0	0	0	0	0	0	0	0	0	0	0	0	0	0	0	0
Tm2d1	0.7852	0	0	0	0	0	0	0	0	0	0	0	0	0	0	0	0	0	0	0
Mthfs	0.785124	0	0	0	0	0	0	0	0	0	0	0	0	0	0	0	0	0	0	0
Psph	0.784762	-1.00421	0.666727	-0.650025	0	0	0	0	0	0	0	0	0	0	0	0	0	0	0	0
Plekhj1	0.784108	0	0.768546	0	0	0	0	0	0	0	0	0	0	0	0	0	0	0	0	0
Uap1l1	0.78396	-1.08698	0	-0.693775	0	0	0	0	0	0	1.21079	0	0.844314	0	0	-0.672056	0	0	0.759442	0
Gm11423	0.782935	0	0.761847	0	0	0	0	0	0	0	0	0	0	0	0	0	0	0	0	0
3110056K07Rik	0.782827	0	0	0	0	0	0	0	0	0	0	0	0	0	0	0	0	0	0	0
Anapc11	0.782664	0	0.690597	0	0	0	0	0	0	0	0	0	0	0	0	0	0	0	0	0
Gm5617	0.781665	0	0.652158	0	0	0	0	0	0	0	0	0	0	0	0	0	0.777126	0	0	0
Dct	0.780685	3.12934	0	2.85129	0	0	0	1.53841	0	0	-2.52131	0.747258	-1.57897	0	-0.698122	0	0	-0.942753	0	0
Pstk	0.780234	0	0	0	0	0	0	0	0	-0.643939	0	0	0	0	0	-0.710077	0	0	0	0
6330418K02Rik	0.780206	0	0	0	0	0	0	0	0	0	0	0	0	0	0	0	0	0	0	0
Actr6	0.779578	0	0	0	0	0	0	0	0	-0.659563	0	0	0	0	0	0	0	0	0	0
Gm5182	0.779335	0	0	0	0	0	0	0	0	0	0	0	0	0	0	0	0	0	0	0
Cacybp	0.778554	0	0	0	0	0	0	0	0	0	0	0	0	0	0	-0.709572	0	0	0	-0.775549
Gas2	0.778444	0	0	0.854997	0	0	0	0	0	0	1.04795	0	0	0	0	-0.604838	0	0	0	0
Cib2	0.777962	0	0.98723	0	0	0	0	0	0	0	0	0	0	0	0	0	0	0	0	0
Ccdc58	0.777388	0	0	0	0	0	0	0	0	0	0	0	0	0	0	0	0	0	0	0
Crls1	0.776748	0	0.701742	0	0	0	0	0.61834	0	-0.660857	0	0	0	0	0	0	0	0	0	0
BC002163	0.776555	0	0.959543	0	0	0	0	0	0	0	0	0	0	0	0	0	0	0	0	0
Hmgn2	0.776408	-1.00165	0	-1.43889	0	0	0	0	0	0	0.86414	0	0	0	0	0	0	0	0	0
Polr2l	0.776379	0	0.823456	0	0	0	0	0	0	0	0	0	0	0	0	0	0	0	0	0
Olfr1033	0.776284	0	0.745567	0	0	0	0	0	0	0	0	0.71269	0	0	0	0	0	0	0	0
Hax1	0.775915	0	0.696043	0	0	0	0	0	0	0	0	0	0	0	0	0	0	0	0	0
Lyrm2	0.77526	0	0	0	0	0	0	0	0	0	0	0	0	0	0	0	0	0	0	0
Lyrm9	0.774793	0	0	0	0	0	0	0	0	0	0	0	0	0	0	0	0	0	0	0
Rps17	0.774694	0	0	0	0	0	0	0	0	0	0	0	0	0	0	0	0	0	0	0
Gm14326	0.774528	0	0	0	0	0	0	0	0	0	0	0	0	0	0	0	0	0	0	0
C330018D20Rik	0.774517	0	0	0	0	0	0	0	0	0	0	0	0	0	0	0	0	0	0	0
H2afj	0.774393	0	0.663964	0	0	0	0	0	0	0	0	0	0	0	0	0	0	0	0	0
Atp6v1f	0.773551	0	0.668385	0	0	0	0	0	0	0	0	0	0	0	0	0	0	0	0	0
A430046D13Rik	0.773282	0	0.610584	0	0	0	0	0	0	0	0	0	0	0	0	0	0	0	0	0
Mup19	0.772823	0	0	0	0	0	0	1.64534	0	0	0	0	-1.12756	0	0	0	0	0	0	0
1810026B05Rik	0.771608	0	0	0	0	0	0	0	0	0	0	0	0	0	0	0	0	0	0	0
H2-K2	0.770655	0	0	0	0	0	0	0	0	0	0	0	0	0	0	0	0	0	0	0
Uros	0.770376	0	0	0	0	0	0	0	0	0	0	0	0	0	0	0	0	0	0	0
Col5a3	0.770295	-0.684716	0	1.40979	0	0	0	0	0	0	1.34456	0	0	0	0	0	0	0	0	0
Ifrd1	0.768997	-0.727344	0	-1.11349	0	0	0	0	0	0	0	0	0	0	0	0	0	0	0	0
Ndufb3	0.768901	0	0	0	0	0	0	0	0	0	0	0	0	0	0	0	0	0	0	0
Nat1	0.768876	0.938766	0	1.00902	0	0	0	0.618242	0	0	0	0	0	0	0	0	0	0	0	0
Arntl	0.768598	-1.01854	0.595546	0	0	0.788922	0	0	0	0	0	2.05765	0	-1.63165	0	0	-0.884106	0	-1.55498	-1.95981
Polr2c	0.767175	0	0	0	0	0	0	0	0	0	0	0	0	0	0	0	0	0	0	0
mt-Atp8	0.765627	0	0	0	0	0	0	0	0	0	0	0	0	0	0	0	0	0	0	0
Sec22a	0.765285	0	0	0	0	0	0	0	0	0	0	0	0	0	0	0	0	0	0	0
Zeb2os	0.765138	0	0	0	0	0	0	0	0	0	0	0	0	0	0	0	0	0	0	0
Gng5	0.764998	0	0	0	0	0	0	0	0	0	0	0	0	0	0	0	0	0	0	0
Gm7160	0.764716	0	0	0	0	0	0	0	0	0	0	0	0	0	0	0	0	0	0	0
Gm10073	0.763771	0	0	0	0	0	0	0	0	0	0	0	0	0	0	0	0	0	0	0
Dctpp1	0.763697	0	0.728457	-0.642441	0	0	0	0	0	0	0	0	0	0	0	0	0	0	0	0
Spryd7	0.763607	0	0	0.861022	0	0	0	0	0	0	0	0	0	0	0	0	0	0	0	0
Cryzl1	0.762863	0	0	0	0	0	0	0	0	0	0	0	0	0	0	0	0	0	0	0
Myl6	0.762705	0	0	0	0	0	0	0	0	0	0	0	0	0	0	0	0	0	0	0
2810013P06Rik	0.762369	0	0.60155	0	0	0	0	0	0	0	0	0	0	0	0	0	0	0	0	0
Bbip1	0.761649	0	0	0	0	0	0	0	0	0	0	0	0	0	0	-0.659764	0	0	0	0
Rpl6	0.761202	0	0.663744	0	0	0	0	0	0	0	0	0	0	0	0	0	0	0	0	0
Zfp617	0.761112	0	0	0	0	0	0	0	0	0	0	0	0	0	0	0	0	0	0	0
Elof1	0.761028	0	0	0	0	0	0	0	0	0	0	0	0	0	0	0	0	0	0	0
Rbm7	0.76067	0	0	0	0	0	0	0	0	0	0	0	0	0	0	0	0	-0.587408	0	0
Cox7b	0.760278	0	0	0	0	0	0	0	0	0	0	0	0	0	0	0	0	0	0	0
Mrpl48	0.759785	0	0	0	0	0	0	0	0	0	0	0	0	0	0	0	0	0	0	0
Gm12350	0.759418	0	0	0	0	0	0	0	0	0	0	0	0	0	0	0	0	0	0	0
Gm4366	0.758369	0	0	0	0	0	0	0	0	0	0	0	0	0	0	0	0	0	0	0
Gm32063	0.758318	0	0.657341	0	0	0	0	0	0	0	0	0	0	0	0	0	0	0	0	0
Efna1	0.757476	0	0	0	0	0	0	0	0	0	0	0	0	0	0	-0.89338	0	0	0	0
Lsm3	0.756854	0	0	0	0	0	0	0	0	0	0	0	0	0	0	-0.658277	0	0	0	0
Coa3	0.756437	0	0	0	0	0	0	0	0	0	0	0	0	0	0	0	0	0	0	0
Mgst3	0.756259	0.658727	0	0	0	0	0	0	0	0	0	0	0.727668	0	0	-0.605556	0.924058	0	0.77687	0
Rps3a1	0.755889	0	0	0	0	0	0	0	0	0	0	0	0	0	0	0	0	0	0	0
Lgalsl	0.755616	0	0	0	0	0	0	0.690928	0	0	0	1.12283	0	0	0	0	0	0	0	-0.662488
Gm31333	0.755216	0	0.611897	0	0	0	0	0	0	0	0	0	0	0	0	0	0	0	0	0
BC024386	0.75517	0	0	0	0	0	0	0	0	0	0	0	0	0	0	0	0	0	0	0
Fmc1	0.753278	0	0	0	0	0	0	0	0	0	0	0	0	0	0	-0.728891	0	0	0	0
Zfp52	0.753254	0	0	0	0	0	0	0.729084	0	0	0	0	0	0	0	0	0	0	0	0
Eef1akmt2	0.751176	0	0	0	0	0	0	0	0	0	0	0	0	0	0	-0.631444	0	0	0	0
Pdlim2	0.750675	-0.942878	0	-1.10289	0	0	0	0.606819	0	0	0	0	0	0	0	0	0	0	0	0
Naca	0.750205	0	0.666006	0	0	0	0	0	0	0	0	0	0	0	0	0	0	0	0	0
Blm	0.750135	-1.3173	0	-1.14257	0	0	0	0	0	0	1.17856	0	0	0	0	0	0	0	0	0
Naa38	0.750043	0	0	0	0	0	0	0	0	0	0	0	0	0	0	0	0	0	0	0
Srrm4os	0.749683	0	0	0	0	0	0	0	0	0	0	0	0	0	0	0	0	0	0	0
Clec2d	0.749256	0	0	0	0	0	0	0	0	0	0	0	0	0	0	-1.05721	0	0	0	0
Ggh	0.748947	0	0	0	0	0	0	0	0	0	0	0	0	0	0	0	0	0	0	0
Zfp958	0.747983	0	0.623405	0	0	0	0	0	0	0	0	0	0	0	0	0	0	0	0	0
Tmem218	0.747967	-0.631303	0	-0.664894	0	0	0	0	0	0	0	0	0	0	0	0	0	0	0	0
Cdkn2c	0.747816	-0.856758	0	-1.59103	0	0	0	0	0	0	0.777426	0	1.05145	0	0	0	0	0	0	0
Psmb5	0.74697	0	0.835593	0	0	0	0	0	0	0	0	0	0	0	0	0	0	0	0	0
Snx7	0.746004	0	0	0	0	0	0	0	0	0	0	0	0	0	0	0	0	0	0	0
Bola3	0.745638	0	0	0	0	0	0	0	0	0	0	0	0	0	0	0	0	0	0	0
Tmem14c	0.745363	0	0.715231	0	0	0	0	0	0	0	0	0	0	0	0	0	0	0	0	0
Mettl1	0.745111	0	0	0	0	0	0	0.615405	0	0	0	0	0	0	0	0	0	0	0	0
Fam241b	0.744969	0	0.68997	0	0	0	0	0	0	0	0	0	0	0	0	-0.754256	0.665165	0	0	0
Adh6-ps1	0.744523	0	0	0	0	0	0	0	0	0	0	0	0	0	0	0	0	0	0	0
Ndufs6	0.744429	0	0.642234	0	0	0	0	0	0	0	0	0	0	0	0	0	0	0	0	0
Tefm	0.744344	0	0	0	0	0	0	0.631756	0	0	0	0	0	0	0	0	0	0	0	0
Fbxl5	0.744179	0	0.640047	0	0	0	0	0	0	0	0	0	0	0	0	0	0	0	0	0
Polr2e	0.743127	0	0	0	0	0	0	0	0	0	0	0	0	0	0	0	0	0	0	0
Tmem160	0.742741	0	0.803664	0	0	-0.700875	0	0	0	0	0	0	0	0	0	0	0	0	0	0
1700034P13Rik	0.741641	0	0	0	0	0	0	0	0	0	0	0	0	0	0	0	0	0	0	0
Thoc7	0.740971	0	0	0	0	0	0	0	0	0	0	0	0	0	0	0	0	0	0	0
Chac2	0.740963	0	0	0	0	0	0	0	0	0	0	0	0	0	0	-0.6831	0	0	0	0
Hmcn1	0.74044	-1.76641	0	-2.18292	0	0	0	0	0	0	0	0	0	0	0	0	0	0	0	0
Gm41231	0.739361	0	0	0	0	0	0	0	0	0	0	0	0	0	0	0	0	0	0	0
Arl1	0.739349	0	0	0	0	0	0	0	0	0	0	0	0	0	0	0	0	0	0	0
Gadd45a	0.739006	0	0	0	0	0	0	0	-0.626071	0	0	-1.02934	0	0	0	0	0.989001	0	0	0
Gm25291	0.73899	0	0.767479	0	0	0	0	0	0	0	0	0	0	0	0	0	0	0	0	0
1110028F11Rik	0.738221	0	0.646466	0	0	0	0	0	0	0	0	0	0	0	0	0	0	0	0	0
Alkbh7	0.737701	0	0.624821	0	0	0	0	0	0	0	0	0	0	0	0	-0.621634	0	0	0	0
2010315B03Rik	0.736021	0	0.603946	0	0	0	0	0	0	0	0	0	0	0	0	0	0	0	0	0
Gm22973	0.735872	0	0.932319	0	0	0	0	0	0	0	0	0	0	0	0	0	0	0	0	0
Phf11d	0.735188	0	0	-0.728111	0	0	0	0.679097	0	0	0	0	0	0	0	0	0	0	0	0
Srp9	0.734829	0	0	0	0	0	0	0	0	0	0	0	0	0	0	0	0	0	0	0
Mrpl54	0.73477	0	0	0	0	0	0	0	0	0	0	0	0	0	0	0	0	0	0	0
Srp19	0.73449	0	0	0	0	0	0	0.629643	0	0	0	0	0	0	0	0	0	0	0	0
Ndufb1-ps	0.73441	0	0	0	0	0	0	0	0	0	0	0	0	0	0	0	0	0	0	0
Ppp1r14a	0.734249	-0.91113	0	-0.755244	0	0	0	0	0	0	0	0	0	0	0	-0.677876	0	0	0	0.983136
Plac8	0.734188	0	0	-0.932065	0	0	0	0	0	0	0	0	0	0	0	0	0	0	1.69047	0
Fmn1	0.733729	0.622277	0	0.690387	0	0	0	0.7305	0	0	0	0	0	0	0	-0.706525	0	0	0	0
Atp5h	0.733608	0	0.653875	0	0	0	0	0	0	0	0	0	0	0	0	0	0	0	0	0
Lyplal1	0.733602	0	0	0	0	0	0	0	0	0	0	0	0	0	0	0	0	0	0	0
Sorl1	0.733094	0	0	0	0	0	0	0	0	0	0	0	0	0	0	0	0	0	0	0
Tagln	0.732842	-1.38697	0	-1.55032	0	0	0	0	0	0	0.93768	0	0	0	0	0	0	0	0	0
Atp5mpl	0.732189	0	0	0	0	0	0	0	0	0	0	0	0	0	0	0	0	0	0	0
Swi5	0.732059	0	0	0	0	0	0	0	0	0	0	0	0	0	0	0	0	0	0	0
Car8	0.731841	0	0.978652	0	0	0	0	0	0	0	0	0	0	0	0	0	0	0	0	0
Fam136a	0.731537	0	0	0	0	0	0	0.627224	0	0	0	0	0	0	0	0	0	0	0	0
Atf3	0.731278	0	0	0	0	0	0	0	0	0	1.07386	0	1.07327	0	0	0	1.12553	0	0	0
Lilr4b	0.730923	2.09416	0	0	0	0	0	0	0	0	1.04772	0	0	0	0	-0.601163	0	0	0	0
D730003I15Rik	0.730547	0	0	0	0	0	0	0	0	0	0	0	0	0	0	0	0	0	0	0
Coa4	0.730328	0	0	0	0	0	0	0	0	0	0	0	0	0	0	0	0	0	0	0
Insc	0.730306	-1.23858	0	0	0	0	0	0.85439	0	0	0	0.687273	-0.639216	0	0	-1.00526	0	0	-1.03966	0
Gm13021	0.729876	0	1.02193	0	0	0	0	0	0	0	0	0	0	0	0	0	0	0	0	0
Cdpf1	0.729744	0	0	0	0	0	0	0	0	0	0	0	0	0	0	-1.32361	0	0	0	0
Tfpi2	0.729395	0	0	0	0	0	0	0	0	0	0	0	0	0	0	-0.651089	0	0	0	0
Gm11752	0.729106	0	0	0	0	0	0	0	0	0	0	0	0	0	0	0	0	0	0	0
Cd200r1	0.728842	-1.13341	0	-1.36919	0	0	0	0	0	0	1.15084	0	0	0	0	-0.677367	0	0	0	0
Fras1	0.728614	0	0	0	0	0	0	0	0	0	-0.660277	0	0	0	0	-1.02549	0	0	0	0
Dgcr6	0.728337	0	0.752483	0	0	0	0	0	0	0	0	0	0	0	0	0	0	0	0	0
Mrpl27	0.7283	0	0	0	0	0	0	0	0	0	0	0	0	0	0	0	0	0	0	0
Tnfrsf12a	0.728296	0	0	0	0	0	0	0	0	0	0	0	0	0	0	0	0	0	-0.841483	0
Fundc2	0.728255	0	0	-0.618132	0	0	0	0.598641	0	0	0	0	0	0	0	0	0	0	0	0
Camta1	0.728145	0	0	0	0	0	0	0	0	0	0	0	0	0	0	0	0	0	0	0
Klf6	0.727872	0	0	-0.883888	0	0	0	0	0	0	0.816371	0	0	0	0	0	0	0	0	0
Gtf2h5	0.727725	0	0	0	0	0	0	0	0	0	0	0	0	0	0	0	0	0	0	0
Gm36264	0.72759	0	0	0	0	0	0	0	0	0	0	0	0	0	0	0	0	0	0	0
Otulinl	0.727352	0	0	-0.950067	0	0	0	0	0	0	0	0	0	0	0	0	0	0	0	0
AC151289.1	0.726784	0	0.708099	0	0	0	0	0	0	0	0	0	0	0	0	0	0	0	0	0
Ube2b	0.726537	0	0	0	0	0	0	0	0	0	0	0	0	0	0	0	0	0	0	0
Bach2os	0.725741	0	0	0	0	0	0	0	0	0	0	0	0	0	0	0	0	0	0	0
2310015A10Rik	0.72489	0	0	0	0	0	0	0	0	0	0	0	0	0	0	0	0	0	0	0
Gtf3a	0.723762	0	0.619591	0	0	0	0	0	0	0	0	0	0	0	0	0	0	0	0	0
Ube2u	0.723129	0	0	0	0	1.10317	0	0.930465	0	0	0	0.83214	0	0	0	0	0	0	0	0
Gm16157	0.72283	0	0	0	0	0	0	0	0	0	0	0	0	0	0	0	0	0	0	0
Ppp2r3c	0.722808	0	0	0	0	0	0	0	0	0	0	0	0	0	0	0	0	0	0	0
Hist1h4i	0.722507	0	0	0	0	0	0	0	0	0	0	0	0	0	0	0	0	0	0	0
Sar1b	0.721832	0	0	0	0	0	0	0.733728	0	0	0	0	0	0	0	0	0	0	0	0
Tmem17	0.721666	0	0.626453	0	0	0	0	0	0	0	0	0	0	0	0	0	0	0	0	0
Ccdc68	0.721259	-0.874229	0	-1.27637	0	0	0	0.681761	0	0	0	0	0	0	0	0	0	0	0	0
Ccdc148	0.720982	0	0.589427	0	0	0	0	0	0	0	0	0	0	0	0	-0.88185	0	0	0	0
Mir22hg	0.720795	0	0.960085	0	0	0	0	0	0	0	0	0	0	0	0	0	0	0	0	0
Slc35d2	0.720207	0	0	0	0	0	0	0.626049	0	0	0	0	0	0	0	0	0	0	0	0
H2-DMb1	0.719961	0	0	0	0	0	0	0	0	0	1.1277	0	0	0	0	-0.944955	0	0	0	0
1110019D14Rik	0.719863	0	0	0	0	0	0	0	0	0	0	0	0	0	0	0	0	0	0	0
Ndufs4	0.719734	0	0	0	0	0	0	0	0	0	0	0	0	0	0	0	0	0	0	0
Pisd-ps1	0.718602	0	0	0	0	0	0	0	0	0	0	0	0	0	0	0	0	0	0	0
Ostc	0.718416	-1.09081	0	-1.02691	0	0	0	0	0	0	0	0	0	0	0	0	0	0	0	0
A330023F24Rik	0.718284	0	0.821955	0	0	0	0	0	0	0	0	0	0	0	0	0	0	0	0	0
Cox19	0.718037	0	0.616504	0	0	0	0	0	0	0	0	0	0	0	0	0	0	0	0	0
Paox	0.717944	0	0	0	0	0	0	0	0	0	0	0	0	0	0	-0.836701	0	0	0	0
Ndufa7	0.717033	0	0	0	0	0	0	0	0	0	0	0	0	0	0	0	0	0	0	0
Capg	0.716953	0	0	0	0	-0.881481	0	0	0	0	1.18598	0	0.903148	0	0	-0.671774	0	0	0	0
Plin4	0.716935	0.594344	0	1.268	0	0	0	0	0	0	0	1.19412	0	0	0	1.20772	0.587652	0	0	0
Ccdc167	0.71642	0	0	0	0	0	0	0	0	0	0	0	0	0	0	-0.692827	0	0	0	0
Bud31	0.716237	0	0	0	0	0	0	0	0	0	0	0	0	0	0	0	0	0	0	0
Glipr1	0.716113	0	0	0	0	0	0	0	0	0	1.82781	0	0	0	0	0	0	0	0	0
Gm19426	0.715608	0	0	0	0	0	0	0	0	0	0	0	0	0	0	0	0	0	0	0
Selenoh	0.715602	-1.19002	0	-1.4212	0	0	0	0	0	0	0	0	0	0	0	0	0	0	0	0
Gchfr	0.715477	0	0.609904	0	0	0	0	0	0	0	0	0	0	0	0	0	0	0	0	0
Mrpl13	0.714356	0	0	0	0	0	0	0	0	0	0	0	0	0	0	0	0	0	0	0
Gm46516	0.714313	0	0	0	0	0	0	0	0	0	0	0	0	0	0	0	0	0	0	0
Csad	0.714229	0.833654	0	1.75203	0	0	0.942394	0	-1.04811	0	0	0	0.862854	0.736768	0	0	0	0	0	-0.724769
Htatip2	0.71421	0	0.648573	0	0	0	0	0	0	0	0.619335	0	0.673101	0	0	0	0	0	0	0
Gm25835	0.714064	0	1.08337	0	0	0	0	0	0	0	0	0	0	0	0	0	0	0	0	0
Zfp984	0.713559	0	0	0	0	0	0	0	0	0	1.01973	0	0	0	0	0	0	0	0	0
Insig1	0.71294	0	0.605438	0	0	0	0.617838	0	0	0	0	0	0	0	0	-1.14295	0	0	0	0
Btf3l4	0.712724	0	0	0	0	0	0	0	0	0	0	0	0	0	0	0	0	0	0	0
Gm9794	0.712463	0	0	0	0	0	0	0	0	0	0	0	0	0	0	0	0	0	0	0
Timm13	0.71243	0	0.71895	0	0	0	0	0	0	0	0	0	0	0	0	0	0	0	0	0
Rpl37a	0.711764	0	0.619981	0	0	-0.729827	0	0	0	0	0	0	0	0	0	0	0	0	0	0
Pop5	0.711703	0	0.843183	0	0	0	0	0	0	0	0	0	0	0	0	0	0	0	0	0
F630028O10Rik	0.711506	0	0	0	0	0	0	0	0	0	0	0	0	0	0	0	0	0	0	0
Ddit4l	0.711244	0	0	0	0	0	0	0	0	0	1.46006	0	0	0	0	0	0.80422	0	0	0
Bet1	0.710913	0	0	0	0	0	0	0	0	0	0	0	0	0	0	0	0	0	0	0
Tspo	0.71027	0	0	0	0	-0.833705	0	0	0	0	0	0	0	0	0	0	0	0	0	0
Gm39469	0.710055	0	0	0	0	0	0	0	0	0	0	0	0	0	0	0	0	0	0	0
Casp12	0.709945	0	0	0	0	0	0	0.591875	0	0	1.31507	0	0	0	0	0	0	0	0	0
2310009A05Rik	0.709127	0	0	0	0	0	0	0	0	0	0	0	0	0	0	0	0	0	0	0
Sertad3	0.70864	0	0	0	0	0	0	0	0	0	0	0	0	0	0	-0.688499	0	0	0	0
Ccne2	0.708168	-1.75367	0	-1.98437	0	0	0	0	0	0	1.14405	0	0	0	0	-0.585002	0	0	0	0
Dmrta1	0.707919	0	1.37274	0	0	0	0	0.619034	0	0	0	0	-1.5496	0	0	0	0	0	0	0
Tmem243	0.707659	0	0.656661	0.625668	0	0	0	0	0	0	0	0	0	0	0	0	0	0	0	0
0610040B10Rik	0.706337	0	0	0	0	0	0	0	0	0	0	0	0	0	0	0	0	0	0	0
Izumo4	0.706208	0	0	0	0	0	0	0	0	0	0	-0.662244	0	0	0	-0.838499	0	0	0	0
Ndufb6	0.705988	0	0	0	0	0	0	0	0	0	0	0	0	0	0	0	0	0	0	0
Emp1	0.705431	-1.29222	0	-0.894627	0	0	0	0	0	0	2.00546	0	0.936094	0	0	0	0	0	0.925779	0
Nubp1	0.704957	-0.693329	0	0	0	0	0	0	0	0	0	0	0	0	0	0	0	0	0	0
Ppp1r14b	0.704956	0	0	0	0	0	0	0	0	0	0	0	0	0	0	-0.873483	0	0	0	0
Fam120aos	0.704304	0	0	0	0	0	0	0	0	0	0	0	0	0	0	0	0	0	0	0
Gimd1	0.704024	-1.16548	0	-1.25542	0	0	0	0	0	0	0	0	0	0	0	-1.10822	0	0	0	0
Ndufa4	0.703694	0	0	0	0	0	0	0	0	0	0	0	0	0	0	0	0	0	0	0
Snord17	0.702174	0	0	0	0	0	0	0	0	0	0	0	0	0	0	0	0	0	0	0
Mup-ps14	0.701763	0	0	0	0	0	0	0	0	0	0	0	0	0	0	0	0	0	0	0
BC025446	0.70175	0	0.610048	0	0	0	0	0	0	0	0	0	0	0	0	0	0	0	0	0
9230114K14Rik	0.701742	0	0	0	0	0	0	0	0	0	0	0	0	0	0	0	0	0	0	0
Trappc2l	0.701562	0	0	0	0	0	0	0	0	0	0	0	0	0	0	0	0	0	0	0
Trbc2	0.701547	0	0	0	0	0	0	0	0	0	0	0	0	0	0	0	0	0	0	0
Eef1e1	0.700744	0	0	0	0	0	0	0	0	0	0	0	0	0	0	0	0	0	0	0
Smim15	0.700608	0	0	0	0	0	0	0	0	0	0	0	0	0	0	0	0	0	0	0
Mrps16	0.700551	0	0	0	0	0	0	0	0	0	0	0	0	0	0	0	0	0	0	0
Aimp1	0.699798	0	0	0	0	0	0	0	0	0	0	0	0	0	0	0	0	0	0	0
H2-T10	0.699107	0	0	0	0	0	0	0	0	0	0	0	0	0	0	0	0	0	0	0
Gm45871	0.698969	0	0	0	0	0	0	0.607305	0	0	0	0	0	0	0	0	0	0	0	0
Plet1os	0.698863	0	0	0	0	0	0	0	0	0	0	0	0	0	0	0	0	0	0	0
Hao2	0.698366	-1.74027	0	-9.6936	0	0	0	0	1.23788	0	0	-0.613665	0	0	0	0	0	0	0	0
1500026H17Rik	0.698351	0	0	0	0	0	0	0	0	0	0	0	0	0	0	0	0	0	0	0
Erich1	0.698268	0	0	0	0	0	0	0	0	0	0	0	0	0	0	0	0	0	0	0
Chka	0.696723	-0.730099	0	0	0	0.689718	0	0	0	0	0	0.760788	0	0	0	-0.694783	0	0	-0.848185	-1.40678
Crygn	0.696669	0	0.607785	0	0	0	0	0	0	0	0	0.65141	0	0	0	0.867582	0	0	0	0
Coprs	0.696594	0	0	0	0	0	0	0	0	0	0	0	0	0	0	-0.802573	0	0	0	0
Mrpl11	0.696176	0	0	0	0	0	0	0	0	0	0	0	0	0	0	-0.593366	0	0	0	0
Hprt	0.695995	0	0	0	0	0	0	0	0	0	0	0	0	0	0	0	0	0	0	0
Snx16	0.69568	0	0	0	0	0	0	0	0	0	0	0	0	0	0	0	0	0	0	0
Syne1	0.695132	-1.08248	0	0	0	0	0	0	0.736344	0	0	0	0	0	0	0	0	-0.810917	0	0
St8sia4	0.694807	0	0	-0.61548	0	0	0	0	0	0	1.25119	0	0	0	0	0	0	0	0	0
Rpl14-ps1	0.694419	0	0	0	0	0	0	0	0	0	0	0	0	0	0	0	0	0	0	0
Gm7049	0.693442	0	0	0	0	0	0	0	0	0	0	0	0	0	0	0	0	0	0	0
Trub2	0.692268	-0.628918	0.587591	0	0	0	0	0.671167	0	0	0	0	0	0	0	0	0	0	0	0
Rnf138	0.692207	0	0	0	0	0	0	0	0	0	0	0	0	0	0	0	0	0	0	0
Pebp1	0.692004	0	0.807516	0	0	0	0	0	0	0	0	0	0	0	0	0	0	0	0	0
Zfp85	0.691449	0	0	0	0	0	0	0	0	0	0	0	0	0	0	0	0	0	0	0
Gm15883	0.691442	0	0	0	0	0	0	0	0	0	0	0	0	0	0	0	0	0	0	0
Rdm1	0.691334	0	0	0	0	0	0	0	0	0	0	0	0	0	0	-0.60095	0	0	0	0
Mir17hg	0.690894	0	0	0	0	0	0	0	0	0	0	0	0	0	0	0	0	0	0	0
Snhg20	0.690425	0	0	0	0	0	0	0	0	0	0	0	0	0	0	0	0	0	0	0
Fkbp3	0.690368	0	0	0	0	0	0	0	0	0	0	0	0	0	0	-0.615083	0	0	0	0
1190007I07Rik	0.690218	0	0	0	0	0	0	0	0	0	0	0	0	0	0	0	0	0	0	0
Zfp606	0.690121	0	0.601839	0	0	0	0	0	0	0	0	0	0	0	0	0	0	0	0	0
Gm4032	0.689674	0	0	0	0	0	0	0	0	0	0	0	0	0	0	0	0	0	0	0
Id1	0.689655	0.933898	0	0	0	0	0	0.697892	0	0	0	0	0	0	0	0	0	0	-0.747355	0
Snu13	0.689415	0	0	0	0	0	0	0	0	0	0	0	0	0	0	0	0	0	0	0
Pafah1b3	0.689302	-0.690223	0.585328	0	0	0	0	0	0	0	0	0	0	0	0	0	0	0	0	0
Vamp5	0.689078	0	0	-0.798389	0	0	0	0	0	0	0	0	0	0	0	-0.960876	0	0	0	0
Psmb9	0.688468	0	0	0	0	0	0	0	0	0	0	0	0	0	0	-0.595391	0	0	0	0
Ccdc138	0.688087	0	0	0	0	0	0	0	0	0	0	0	0	0	0	0	0	0	0	0
Pdrg1	0.687741	0	0	0	0	0	0	0	0	0	0	0	0	0	0	0	0	0	0	0
Clec11a	0.687347	-0.591382	0	0	0	0	0	0	0	0	0	0	0	0	0	-0.794806	0	0	0	0
Med30	0.687339	0	0	0	0	0	0	0	0	0	0	0	0	0	0	-0.649189	0	0	0	0
Rap1b	0.686253	0	0	0	0	0	0	0	0	-0.608254	0	0	0	0	0	0	0	0	0	0
Nudt2	0.685919	0	0	0	0	0	0	0	0	0	0	0	0	0	0	-0.835062	0	0	0	0
Acaca	0.685766	0	0	0	0	0	0	0	0	0	0	0	0	0	0	0	0	0	0	0
G6pdx	0.685608	0	-0.828305	-0.894189	0	0.625955	0	0	0	0.692533	-0.850891	0	-1.00986	-1.02954	0	-0.596645	0	0	0	0
Chchd6	0.685107	0	0	-0.852739	0	0	0	0	0	0	0	0	0	0	0	0	0	0	0	0
Dusp19	0.683969	0	0	0	0	0	0	0	0	0	0	0	0	0	0	-0.6007	0	0	0	0
Zfyve21	0.683647	0	0.724214	0	0	0	0	0	0	0	0	0	0	0	0	0	0	0	0	0
Kcne3	0.683558	0	0	-0.636401	0	0	0	0	0	0	0	0	0	0	0	-0.591916	0	0	0	0
Fam104a	0.683253	0	0	0	0	0	0	0	0	0	0	0	0	0	0	0	0	0	0	0
Mrps36	0.682349	0	0.652788	0	0	0	0	0	0	0	0	0	0	0	0	0	0	0	0	0
Ccdc162	0.681487	0	0.918354	0	0	0	0	0	0	0	0	0	0	0	0	0	0	0	0	0
Slc35b3	0.681402	0	0	0	0	0	0	0	0	0	0	0	0	0	0	0	0	0	0	0
Cby1	0.681307	0	0	0	0	0	0	0	0	0	0	0	0	0	0	0	0	0	0	0
Tmem42	0.680188	0	0	0	0	0	0	0	0	0	0	0	0	0	0	0	0	0	0	0
Zfp960	0.678879	0	0	0	0	0	0	0	0	0	0	0	0	0	0	0	0	0	0	0
Romo1	0.678853	0	0	0	0	0	0	0	0	0	0	0	0	0	0	0	0	0	0	0
Mthfr	0.678824	0	0.640323	0	0.867564	0	0	0	0	0	-1.12274	2.07817	-0.64455	-1.00482	0	0	-0.931999	0	-1.36457	-1.29112
Zfp120	0.678575	0	0	0	0	0	0	0	0	0	0	0	0	0	0	0	0	0	0	0
1500011B03Rik	0.677354	-1.04917	0	-1.23466	0	0	0	0	0	0	1.16319	0	0	0	0	0	0	0	0	0
Tmed10-ps	0.677185	0	0.594721	0	0	0	0	0	0	0	0	0	0	0	0	0	0	0	0	0
Selenow	0.676695	0	0	0	0	0	0	0	0	0	0	0	0	0	0	0	0	0	0	0
Sult1b1	0.676249	0	0	0	0	0	0	0.833074	0	0	0	0	0	0	0	0	0	0	0	0
Gm31992	0.675906	0	0	0	0	0	0	0	0	0	0	0	0	0	0	0	0	0	0	0
Sub1	0.675813	0	0	0	0	0	0	0	0	0	0	0	0	0	0	0	0	0	0	0
Gm9385	0.675469	0	0.635386	0	0	0	0	0	0	0	0	0	0	0	0	0	0	0	0	0
Rpl7a	0.675415	0	0	0	0	0	0	0	0	0	0	0	0	0	0	0	0	0	0	0
Rap1a	0.672393	0	0	0	0	0	0	0	0	0	0	0	0	0	0	0	0	0	0	0
Hint1	0.671614	0	0	0	0	0	0	0	0	0	0	0	0	0	0	0	0	0	0	0
Gls	0.671548	-0.763548	0	-1.05795	0	0	0	0	0	0	0.903917	0	0	0	0	-0.749074	0	0	0	0
Tcim	0.670751	0	0	-0.677243	0	0	0	0	0	0	0	1.10188	0	0	0	0.685965	0	0	0	0
Gm14410	0.669736	0	0	0	0	0	0	0	0	0	0	0	0	0	0	-0.671911	0	0	0	0
Polr1d	0.669111	0	0	0	0	0	0	0	0	0	0	0	0	0	0	0	0	0	0	0
Gm24407	0.669051	0	0	0	0	0	0	0	0	0	0	0	0	0	0	0	0	0	0	0
Smdt1	0.668854	0	0	0	0	0	0	0	0	0	0	0	0	0	0	0	0	0	0	0
Mis18a	0.668295	-0.61016	0	-0.759763	0	0	0	0	0	0	0	0	0	0	0	0	0	0	0	0
Cstb	0.667557	0	0	0	0	0	0	0	0	0	0	0	0	0	0	0	0	0	0	0
H2-M3	0.667366	0	0	0	0	0	0	0	0	0	0	0	0	0	0	-1.13656	0	0	0	0
Mplkip	0.666278	0	0	0	0	0	0	0	0	0	0	0	0	0	0	0	0	0	0	0
Ssr4	0.665463	0	0	0	0	0	0	0	0	0	0	0	0	0	0	-0.819695	0	0	0	0
Zfp593	0.665188	0	0	0	0	0	0	0	0	0	0	0	0	0	0	0	0	0	0	0
Ftl1-ps1	0.664976	0	0	0	0	0	0	0	0	0	0	0	0	0	0	-0.771818	0	0	0	0
Pdgfc	0.663699	0	0	0	0	0	0	0	0.783491	0	0	0	0	0	0	0	0	0	0	0
Ssbp1	0.663596	0	0	0	0	0	0	0	0	0	0	0	0	0	0	0	0	0	0	0
Ms4a6c	0.66329	0	0	-0.653695	0	0	0	0	0	0	0	0	0	0	0	0	-0.891375	0	0	0
Clec12a	0.662723	0	0	0	0	0	0	0	0	0	0	0	0	0	0	-0.828452	0	0	0	0.792951
Slc17a8	0.662612	0	1.03683	0	0	0	0	0	0	0	0	0.985238	-0.778956	-0.836582	0	1.34809	0.995609	0	0	-0.861197
Anxa1	0.662438	-0.784534	0	-0.593405	0	0	0	0	0	0	0.931034	0	0	0	0	0	0	0	0	0
AC154378.1	0.661792	0	0	0	0	0	0	0	0	0	0	0	0	0	0	0	0	0	0	0
Cetn2	0.661392	0	0	0	0	0	0	0.594719	0	0	0	0	0	0	0	-0.65493	0	0	0	0
Fabp4	0.660685	-2.0871	0	-1.83743	0	0	0	0	0	0	1.39543	0	0	0	0	0	0	0	0	0
4930556M19Rik	0.660596	0	0	0	0	0	0	0	0	0	0	0	0	0	0	0	0	0	0	0
Zswim7	0.660333	0	0	0.62951	0	0	0	0	0	0	0	0	0	0	0	0	0	0	0	0
Vti1b	0.659513	0	0	0	0	0	0	0	0	0	0	0	0	0	0	0	0	0	0	0
A430018G15Rik	0.658894	0	0	0	0	0	0	0	0	0	0	0	0	0	0	0	0	0	0	0
2010320M18Rik	0.658805	0	0.633921	0	0	0	0	0	0	0	0	0	0	0	0	0	0	0	0	0
1110004F10Rik	0.658176	0	0	0	0	0	0	0	0	0	0	0	0	0	0	0	0	0	0	0
Rps5	0.657999	0	0	0	0	0	0	0	0	0	0	0	0	0	0	-0.698448	0	0	0	0
Eif3j1	0.657598	0	0.619994	0	0	0	0	0	0	0	0	0	0	0	0	0	0	0	0	0
Gm15772	0.657088	0	0	0	0	0	0	0	0	0	0	0	0	0	0	0	0	0	0	0
Btc	0.656827	0	0	0	0	0	0	0	0	0	1.26025	-1.03957	0	0	0	0	0	0	0	0
Lgals1	0.65682	0	0	0	0	0	0	0	0.634084	0	1.11029	0	0	0	0	0	1.13971	0	0	0
Pmvk	0.656265	0	0	0	0	0	0	0	0	0	0	0	0	0	0	-0.640645	0	0	0	0
Cox4i1	0.65617	0	0.650923	0	0	0	0	0	0	0	0	0	0	0	0	0	0	0	0	0
Elovl6	0.656143	0	0	0	0	0	0	0	0	0	-0.716824	0	0	0	0.599209	0	0	0	0	0
2410015M20Rik	0.656094	0	0	0	0	0	0	0	0	0	0	0	0	0	0	0	0	0	0	0
Blvrb	0.655769	0	0.764185	0	0	0	0	0	0	0	0	0	0	0	0	0	0	0	0	0
Mitd1	0.655604	0	0	0	0	0	0	0	0	0	0	0	0	0	0	0	0	0	0	0
Tifa	0.655537	0.802591	0	1.32219	0	0	0	0	0	0	0	0	0	0	0	-0.729495	0	0	0	0
Cd3g	0.655196	0	0	0	0	0	0	0	0	0	0	0	0	0	0	0	0	0	0	0
Ggact	0.654781	0	0.919052	0	0	0	0	0	0	0	0	0	0	0	0	0	0	0	0	0
Ifi27	0.65468	1.37006	0	1.64541	0	0	0	0	0	0	0	0	0	0	0	0	0	0	0	0
Catsperd	0.654455	-0.693344	0	0	0	0	1.36755	0	0	0	0	0.740264	0	0	0	0	0	0	0	0
Aard	0.654266	-0.830968	0	-1.21161	0	0	0	0	0	0	0	0	0	0	0	-1.10379	0	0	0	0
Fhad1	0.654239	0	0	0	0	0	0	0	0	0	0	0	0	0	0	0	0	0	0	0
Mrpl32	0.653305	0	0	0	0	0	0	0	0	0	0	0	0	0	0	0	0	0	0	0
Mrpl22	0.653106	0	0.641879	0	0	0	0	0	0	0	0	0	0	0	0	0	0	0	0	0
Mtmr11	0.652919	-0.73683	0	-1.00631	0	0	1.01081	0	0	1.21547	0	0	0	0	0	-0.975028	-0.657933	0	0	0
Lsm4	0.652462	0	0	0	0	0	0	0	0	0	0	0	0	0	0	0	0	0	0	0
Nxt1	0.651711	0	0	0	0	0	0	0	0	0	0	0	0	0	0	0	0	0	0	0
Hscb	0.651709	0	0	0	0	0	0	0	0	0	0	0	0	0	0	0	0	0	0	0
Uxt	0.651545	0	0	0	0	0	0	0	0	0	0	0	0	0	0	0	0	0	0	0
2610044O15Rik8	0.65132	0	0	0	0	0	0	0	0	0	0	0	0	0	0	0	0	0	0	0
Get4	0.650447	0	0	0	0	0	0	0	0	0	0	0	0	0	0	0	0	0	0	0
5430402O13Rik	0.650379	0	0	0	0	0	0	0	0	0	0	0	0	0	0	0	0	0	0	0
Gm16418	0.649734	0	0	0	0	0	0	0	0	0	0	0	0	0	0	0	0	0	0	0
A930004J17Rik	0.649512	0	0	0	0	0	0	0	0	0	0	0	0	0	0	0	0	0	0	0
Ncf4	0.649451	0	0	0	0	0	0	0	0	0	0	0.713873	0	0	0	0	0	0	0	0
Sucnr1	0.649351	1.30175	0	1.90974	0	0	0	0.603865	0	0	-0.922103	0	0	0	-0.605156	-1.00296	0.770937	0	0.660131	0
Map2k3os	0.648512	0	0	0	0	0	0	0	0	0	0	0	0	0	0	0	0	0	0	0
Rasgrp2	0.648486	0	0	0	0	0	0	0	0	0	0	0	0	0	0	0	0	0	0	0
C4a	0.648445	0	0	0	0	0	0	0	0	0	0	0	0	0	0	0	0	0	0	0
Atg4a	0.648443	0	0	0	0	0	0	0	0	0	0	0	0	0	0	0	0	0	0	0
Usf1	0.647234	0	0.600573	0	0	0	0	0	0	0	0	0	0	0	0	0	0	0	0	0
Klhdc2	0.646877	0	0	0	0	0	0	0	0	0	0	0	0	0	0	0	0	0	0	0
Gpam	0.646803	-0.926547	0	0	0	0	0.798409	0	0.915869	0.729296	0	0	0	0	0	0	0	0	0	0
Tvp23b	0.64668	0	0	0	0	0	0	0	0	0	0	0	0	0	0	0	0	0	0	0
Ndufb8	0.646156	0	0.633972	0	0	0	0	0	0	0	0	0	0	0	0	0	0	0	0	0
Nebl	0.645916	0	0	0	0	0	0	0	0	0	0	0	0	0	0	0	0	0	0	0
Gm47544	0.645357	0	1.20489	0	0	0	0	0	0	0	0	0	0	0	0	0	0	0	0	0
Zfp119b	0.645349	0	0	0	0	0	0	0.657814	0	0	0	0	0	0	0	0	0	0	0	0
Fam25c	0.645164	0.588213	0	0.985507	0	0	0	0	0	0	0	0	0	0.960412	0	0	0	0	0	0
N6amt1	0.644774	-0.683883	0	-0.600345	0	0	0	0	0	0	0	0	0	0	0	0	0	0	0	0
Bnip3	0.64451	0	0	0	0	0	0	0	0	0	0	0	0	0	0	0	0	0	0	0
Dhrs7b	0.644335	0	0	0	0	0	0	0	0	0	0	0	0	0	0	0	0	0	0	0
Glipr2	0.644196	-0.837319	0	-1.01887	0	0	0	0	0	0	0	0	0	0	0	0	0	0	0	0
Arpc5l	0.642906	0	0	0	0	0	0	0	0	0	0	0	0	0	0	0	0	0	0	0
H2-T22	0.642774	0	0	0	0	0	0	0	0	0	0	0	0	0	0	0	0	0	0	0
Mrpl40	0.642284	0	0	0	0	0	0	0	0	0	0	0	0	0	0	0	0	0	0	0
Ssna1	0.642031	0	0	0	0	0	0	0	0	0	0	0	0	0	0	0	0	0	0	0
Nqo1	0.641242	0	0	-1.1406	0	0	0	0	0	0	0	0	0.828841	0	0	0	0	0	0	0
Pabpn1	0.641169	0	0.615368	0	0	0	0	0	0	0	0	0	0	0.634358	0	-0.791859	0	0	0	0
Pvt1	0.640851	0	0	0	0	0	0	0	0	0	0	0	0	0	0	0	0	0	0	0
Lonrf3	0.638702	0	1.03233	-0.59776	0	0	0	0	0	0	0	0.694773	0	0	0	0	0	0	0	0
Ube2d-ps	0.638498	0	0	0	0	0	0	0	0	0	0	0	0	0	0	0	0	0	0	0
Cenpw	0.638456	-1.61866	0	-1.59258	0	0	0	0	0	0	0	0	0	0	0	0	0	0	0	0
Sp3os	0.638234	0	0	0	0	0	0	0	0	0	0	0	0	0	0	0	0	0	0	0
Gm45091	0.638023	0	0.667052	0	0	0	0	0	0	0	0	0	0	0	0	0	0	0	0	0
Ndufa2	0.637701	0	0	0	0	0	0	0	0	0	0	0	0	0	0	-0.597186	0	0	0	0
Ube2s	0.637019	-0.828753	0	-0.754047	0	0	0	0	0	0	0	0	0	0	0	-0.663611	0	0	0	0
Gjc3	0.636978	0	0	0	0	0	0	0	0	0	0	0	0	0	0	0	0	0	0	0
Serpinb6b	0.636599	0	0	0	0	0	0	0	0	0	0	0	0	0	0	0	0	0	0	-0.597161
2200002D01Rik	0.63642	0.769312	0	1.64992	0	0	0	0	0	0	0	0	0	0	0	0	0	0	0	0
Ptges3	0.636324	0	0.733543	0	0	0	0	0	0	0	0	0	0	0	0	0	0	0	0	0
Neat1	0.636312	0	0.718137	0	0	0	0	0	0	0	0	0	0	0	0	0	0	0	0	0
Spon2	0.636287	0	0	0	0.751477	0.760807	0.816826	0	0	0.968868	0	1.34827	0	0	0	-0.630836	0	0	0	0
Emg1	0.63628	0	0	0	0	0	0	0	0	0	0	0	0	0	0	0	0	0	0	0
Brdt	0.636016	-0.591463	0	-0.843728	0	0	0	0	0	0	0	0	0	0	0	0	0	0	0	0
Pin1	0.635945	0	0	0	0	0	0	0.585398	0	0	0	0	0	0	0	-0.701172	0	0	0	0
Acacb	0.63593	0	0	0	0	0	0	0	0	0	-0.697183	0	-0.835185	0	0	0	0	0	0	0
Timm8a1	0.635535	0	0	0	0	0	0	0.693121	0	0	0	0	0	0	0	-0.612631	0	0	0	0
Igsf5	0.635509	0	0	0	0	0	0	0	0	0	0	0	0	0	0	0	0	0	0	0
Glmn	0.635123	0	0	0	0	0	0	0.586714	0	0	0	0	0	0	0	-0.652289	0	0	0	0
Cd300c2	0.633902	0	0	0	0	0	0	0	0	0	0	0	0	0	0	-0.673699	0	0	0	0
Ppp1r11	0.633574	0	0	0	0	0	0	0	0	0	0	0	0	0	0	0	0	0	0	0
Ppp1cc	0.633479	0	0	0	0	0	0	0	0	0	0	0	0	0	0	0	0	0	0	0
Nt5c3b	0.63346	-1.21951	0	-1.14112	0	0	0	0	0	0	1.41804	0	0	0	0	-0.762181	0	0	0	0
5530601H04Rik	0.632914	0	0	0	0	0	0	0	0	0	0	0	0	0	0	0	0	0	0	0
Rps29	0.632742	0	0	0	0	-0.607568	0	0	0	0	0	0	0	0	0	-0.696328	0	0	0	0
Etohd2	0.632561	0	0	0	0	0	0	0	0	0	0	0	0	0	0	0	0	0	0	0
Hpgds	0.632267	0	0	0	0	0	0	0	0	0	1.66357	-0.748929	0	0	0	0	0	0	0	0
Snrpf	0.631782	0	0	0	0	0	0	0	0	0	0	0	0	0	0	0	0	0	0	0
Ptrhd1	0.631441	0	0	0	0	0	0	0	0	0	0	0	0	0	0	0	0	0	0	0
Prdx2	0.630736	0	0.627729	0	0	0	0	-0.731945	0	0	0	0	0	0	0	0	0	0	0	0
Gm29571	0.629255	0	0	0	0	0	0	0	0	0	0	0	0	0	0	0	0	0	0	0
Pcnp	0.629155	0	0.715497	0	0	0	0	0	0	0	0	0	0	0	0	0	0	0	0	0
Rbx1	0.62792	0	0	0	0	0	0	0	0	0	0	0	0	0	0	0	0	0	0	0
Rccd1	0.627673	-1.00951	0	0	0	0	0	0.805195	0	0	0	0	0	0	0	-0.685928	0	0	0	0
Zfp995	0.627645	0	0	-0.592923	0	0	0	0.734778	0	0	0	0	0	0	0	0	0	0	0	0
Spag4	0.626978	0	0.94995	0	0	0	0	0	0	0	0	0	0	0	0	0	0.686833	0	0	0
Gm4890	0.624798	0	0	0	0	0	0	0	0	0	0	0	0	0	0	0	0	0	0	0
Saysd1	0.624607	0	0.620969	0	0	0	0	0	0	0	0	0	0	0	0	0	0	0	0	0
Fabp7	0.62383	0	0	0	0	0	0	0	0	0	0	0	0	0	0	0	0	0	0	0
Cpxm1	0.62359	-0.647184	0	-0.764282	0	0	0	0	0	0	2.02446	0	1.04849	0	0	0	0	0	0	0
Ppic	0.623155	-2.47286	0	-2.82289	0	0	0	0	0	0	1.48635	0	0	0	0	0	0	0	0	0
Zfp964	0.622886	0	0	0	0	0	0	0	0	0	0	0	0	0	0	0	0	0	0	0
Mrpl12	0.622874	0	0	0	0	0	0	0	0	0	0	0	0	0	0	-0.690248	0	0	0	0
Pdp1	0.622138	-1.16986	0	-1.32985	0	0	0	0	0	0	0	0	0	0	0	0	0	0	0	0
Auh	0.622043	0	0.604035	0	0	0	0	0	0	0	0	0	0	0	0	0	0	0	0	0
Trappc6a	0.621895	0	0	0	0	0	0	0	0	0	0	0	0	0	0	0	0	0	0	0
Cfhr2	0.621726	0	0	0	0	0	0	0	0	0	0	0	0	0	0	0	0	0	0	0
Ssu72	0.621597	0	0	0	0	0	0	0	0	0	0	0	0	0	0	0	0	0	0	0
Raet1e	0.621418	1.44598	0	1.54578	0	0	0	1.58284	0	0	0	0	0	0	0	0	0	0	0	0
Commd7	0.621271	0	0	0	0	0	0	0	0	0	0	0	0	0	0	0	0	0	0	0
Atp5j2	0.621192	0	0	0	0	0	0	0	0	0	0	0	0	0	0	-0.627839	0	0	0	0
Ndufb9	0.619309	0	0	0	0	0	0	0	0	0	0	0	0	0	0	0	0	0	0	0
Cep44	0.618532	0	0	0	0	0	0	0	0	0	0	0	0	0	0	0	0	0	0	0
Chchd2	0.617859	0	0	0	0	0	0	0	0	0	0	0	0	0	0	0	0	0	0	0
Tomm7	0.617819	0	0	0	0	0	0	0	0	0	0	0	0	0	0	0	0	0	0	0
Mterf1a	0.617755	0	0	0	0	0	0	0	0	0	0	0	0	0	0	0	0	0	0	0
Mblac1	0.617196	0	0	0	0	0	0	0	0	0	0	0	0	0	0	0	0	0	0	0
G0s2	0.61689	1.29644	0.620337	1.63445	0	0	0	1.70276	0	0	-0.760699	1.91332	-0.834673	0	0	0.850935	1.19572	0	0	-0.739983
Clpx	0.616888	-0.612447	0	0	0.660614	0.611247	0	0	0	0	0	1.15244	0	-0.939883	0	0.698281	0	0	-1.04757	-1.02988
Gadd45b	0.61684	-1.04546	0.625892	-1.85615	0	0	0	0	0	0	0	0.768521	0	0	0	0.62147	0	0	0	0
Psme2	0.616498	0	0	0	0	0	0	0	0	0	0	0	0	0	0	0	0	0	0	0
Use1	0.616465	0	0	0	0	0	0	0	0	0	0	0	0	0	0	-0.618749	0	0	0	0
Zfp945	0.615492	0	0	0	0	0	0	0	0	0	0	0	0	0	0	0	0	0	0	0
Smpd3	0.615404	-1.1136	-0.901882	0.899358	0	0	0	0	0	0	2.08978	-0.868803	0.994717	0.945581	0	0	-0.725008	0	0.749844	0.951565
5930430L01Rik	0.615357	0	0.716345	0	0	0	0	0	0	0	0	0	0	0	0	0	0	0	0	0
Tpd52l2	0.615225	0	0	0	0	0	0	0	0	0	0	0	0	0	0	0	0	0	0	0
Pdcd5	0.614204	0	0	0	0	0	0	0	0	0	0	0	0	0	0	0	0	0	0	0
Vamp4	0.614175	0	0	0	0	0	0	0	0	0	0	0	0	0	0	0	0	0	0	0
Ddit4	0.613765	-0.784618	0	0	0	-0.620399	0	0	1.14833	0	0	0.715368	0.710074	0.58687	0	0.981301	-1.32385	0	-0.925394	1.56694
Zfp760	0.613644	0	0	0	0	0	0	0.78277	0	0	0	0	0	0	0	0	0	0	0	-0.637371
Gpn3	0.61324	0	0.606088	0	0	0	0	0	0	0	0	0	0	0	0	0	0	0	0	0
Gm39157	0.612904	0	0	0	0	0	0	0	0	0	0	0	0	0	0	0	0	0	0	0
Fam92a	0.612664	0	0	0	0	0	0	0	0	0	0.66015	0	0	0	0	0	0	0	0	0
Med10	0.612251	0	0	0	0	0	0	0	0	0	0	0	0	0	0	0	0	0	0	0
Nck1	0.611829	0	0	0	0	0	0	0	0	0	0	0	0	0	0	0	0	0	0	0
Rpl18	0.611439	0	0	0	0	0	0	0	0	0	0	0	0	0	0	0	0	0	0	0
Dusp1	0.611264	0	0	0	0	0	-0.791928	0	0	0	0	0.828612	0	0	0	0.717354	0	0	0	-0.617281
Ppp1ca	0.610581	0	0	0	0	0	0	0	0	0	0	0	0	0	0	0	0	0	0	0
Il15	0.610177	0	0	-1.61521	0	0	0	0	0	0	0	-0.780688	0	0	0	0	0	0	0	1.03607
Nol7	0.609154	0	0	0	0	0	0	0	0	0	0	0	0	0	0	-0.675973	0	0	0	0
Yrdc	0.609113	0	0	0	0	0	0	0	0	0	0	0	0	0	0	0	0	0	0	0
Fundc1	0.608475	0	0	0	0	0	0	0	0	0	0	0	0	0	0	0	0	0	0	0
Rps28	0.608269	0	0.594743	0	0	0	0	0	0	0	0	0	0	0	0	0	0	0	0	0
Dctn3	0.607972	0	0	0	0	0	0	0	0	0	0	0	0	0	0	0	0	0	0	0
Akr1c13	0.607538	0	0	0	0	0	0	0	0	0	0	0	0	0	0	0	0	0	0	0
Ifi205	0.607406	0	0	0	0	0	0	0	0	0	0	0	0	0	0	0	0	0	0	0
3110040N11Rik	0.607018	0	0	0	0	0	0	0	0	0	0	0	0	0	0	0	0	0	0	0
Cenpx	0.606754	0	0	0	0	0	0	0	0	0	0	0	0	0	0	-0.653898	0	0	0	0
Rfesd	0.606249	0	0	0	0	0	0	0.778778	0	0	0	0	0	0	0	0	0	0	0	0
Mrpl1	0.605765	0	0	0	0	0	0	0	0	0	0	0	0	0	0	0	0	0	0	0
Nat2	0.605441	0	0	0	0	0	0	0	0	0	0	0	0	0	0	0	0	0	0	0
B9d2	0.605101	0	0	0	0	0	0	0	0	0	0	0	0	0	0	0	0	0	0	0
Sult1d1	0.604825	0	0	-0.850167	0	0	0	0	0	-0.85192	0	0	0	0	0	0	0	0	0	0
1110012L19Rik	0.604598	0	0	0	0	0	0	0	0	0	0	0	0	0	0	0	0	0	0	0
Isca2	0.604399	0	0	0	0	0	0	0	0	0	0	0	0	0	0	0	0	0	0	0
Rpl23	0.604252	0	0	0	0	0	0	0	0	0	0	0	0	0	0	0	0	0	0	0
Rpl7	0.604177	0	0	0	0	0	0	0	0	0	0	0	0	0	0	-0.604007	0	0	0	0
Sinhcaf	0.603835	0	0	-0.801951	0	0	0	0	0	0	0	0	0	0	0	-0.62549	0	0	0	0
Zfp983	0.603729	0	0	0	0	0	0	0	0	0	0	0	0	0	0	0	0	0	0	0
Mpc2	0.603612	0	0.811819	-0.829252	0	0	0	0	0	0	0	0	0	0	0	0	0	0	0	0
Tia1	0.603569	0	0	0	0	0	0	0	0	0	0	0	0	0	0	0	0	0	0	0
Pdcd6	0.603508	0	0	0	0	0	0	0	0	0	0	0	0	0	0	0	0	0	0	0
Gm2788	0.60321	0	0.61684	0	0	0	0	0	0	0	0	0	0	0	0	0	0	0	0	0
Sdf2	0.602878	0	0	0	0	0	0	0	0	0	0	0	0	0	0	0	0	0	0	0
E030030I06Rik	0.602427	0.74258	0.68283	0.662724	0	0	0	0	0	0	-0.92095	0	0	0	0	0	0	0	0	0
Higd1a	0.602422	0	0	0	0	0	0	0	0	0	0	0	0	0	0	0	0	0	0	0
Mdp1	0.602314	0	0.676606	0	0	0	0	0	0	0	0	0	0	0	0	0	0	0	0	0
Rfc3	0.601955	0	0	0	0	0	0	0	0	0	0	0	0	0	0	0	0	0	0	0
Tuba1b	0.601832	-1.0565	0	-1.36821	0	0	0	0	0	0	0	0	0	0	0	-0.697058	0	0.634458	0	0
Eef2kmt	0.601485	0	0	0	0	0	0	0	0	0	0	0	0	0	0	0	0	0	0	0
Lipt2	0.601475	0	0	0	0	0	0	0	-0.630386	0	0	0	0	0	0	0	0	0	0	0
Krcc1	0.601368	0	0	0	0	0	0	0	0	0	0	0	0	0	0	0	0	0	0	0
Rab9	0.600216	0	0	0	0	0	0	0	0	0	0	0	0	0	0	0	0	0	0	0
Malat1	0.600001	0	0.706714	0	0	0	0	0	0	0	0	0	0	0	0	0	0	0	0	0
Timm21	0.599943	0	0	0	0	0	0	0	0	0	0	0	0	0	0	0	0	0	0	0
Snrpc	0.599395	-0.632765	0	-0.77031	0	0	0	0	0	0	0	0	0	0	0	0	0	0	0	0
2024-09-10	0.599051	0	0	0	0	0	0	0	0	0	0	0	0	0	0	0	0	0	0	0
Ptpmt1	0.599018	0	0	0	0	0	0	0	0	0	0	0	0	0	0	0	0	0	0	0
Magoh	0.59884	0	0	0	0	0	0	0	0	0	0	0	0	0	0	0	0	0	0	0
H2afv	0.598557	0	0.625445	0	0	0	0	0	0	0	0	0	0	0	0	0	0	0	0	0
Ostf1	0.598444	0	0	0	0	0	0	0	0	0	0	0	0	0	0	0	0	0	0	0
Zfp944	0.598132	0	0	0	0	0	0	0	0	0	0	0	0	0	0	0	0	0	0	0
Gm22486	0.597791	0	1.28001	0	0	0	0	0	0	0	0	0	0	0	0	0	0	0	0	0
Atp5g2	0.597093	0	0	0	0	0	0	0	0	0	0	0	0	0	0	0	0	0	0	0
Dtd1	0.596678	0	0	0	0	0	0	0	0	0	0	0	0	0	0	0	0	0	0	0
Hnf1aos1	0.596579	0	0.593107	0	0	0	0	0	0	0	0	0	0	0	0	0	0	0	0	0
Gm16573	0.596452	0	0	0	0	0	0	0	0	0	0	0	0	0	0	0	0	0	0	0
Mblac2	0.596257	0	0	0	0	0	0	0	0	0	0	0	0	0	0	0	0	0	0	0
Anapc13	0.59587	0	0	0	0	0	0	0	0	0	0	0	0	0	0	0	0	0	0	0
Csrp2	0.594929	0	0	0	0	0	0	0	0	0	0	0	0.64217	0	0	0	0	0	0	0
Fabp5	0.593775	-1.15495	-0.880532	-1.24837	0	0	0	1.35626	-0.589044	0	-1.17758	0	-1.78688	-0.731254	0	-2.32783	-1.00347	0	-1.15024	0
Lrif1	0.593738	0	0	0	0	0	0	0	0	0	0.683424	0	0	0	0	0	0	0	0	0
Wsb1	0.593496	0	0	0	0	0	0	0	0	0	0	0	0	0	0	0	0	0	0	0
Sumo3	0.593455	0	0	0	0	0	0	0	0	0	0	0	0	0	0	0	0	0	0	0
2310011J03Rik	0.592991	0	0	0	0	0	0	0	0	0	0	0	0	0	0	0	0	0	0	0
Havcr2	0.592427	0	0	0	0	0	0	0	0	0	1.28563	0	0	0	0	0	0	0	0	0
AC129328.1	0.592376	0	0	0	0	0	0	0	0	0	0	0	0	0	0	0	0	0	0	0
Scarna2	0.59233	0	0.804425	0	0	0	0	0	0	0	0	0	0	0	0	0	0	0	0	0
4932438A13Rik	0.591843	0	0	0	0	0	0	0	0	0	0	0	0	0	0	0	0	0	0	0
Robo2	0.591732	-0.655747	0	-0.724336	0	0	0	0	0	0	1.12645	0	0	0	0	0	0	0	0	0
Srsf7	0.591551	0	0	0	0	0	0	0	0	0	0	0	0	0	0	0	0	0	0	0
Gm5524	0.591379	0	0	0	0	0	0	0	0	0	0	0	0	0	0	0	0	0	0	0
Ebpl	0.591071	0	0	0	0	0	0	0	0	0	0	0	0	0	0	0	0	0	0	0
Il11ra1	0.590662	0	0	0	0	0	0	0	0	0	0	0	0	0	0	-1.03711	0	0	0	0
Plscr2	0.590404	1.32472	0	0.943834	0	0	0	0	0	0	0	0	0	0	0	0.645841	0	0	0	0
Ddit3	0.59029	0	0	0	0	0	0	0	0	0	0	0	0	0	0	0	0	0	0	0
Gm14399	0.590086	0	0	0	0	0	0	0	0	0	0	0	0	0	0	0	0	0	0	0
Ndufab1	0.58867	0	0	0	0	0	0	0	0	0	0	0	0	0	0	0	0	0	0	0
Ankrd39	0.587784	-0.652031	0	-0.590709	0	0	0	0	0	0	0	0	0	0	0	0	0	0	0	0
Smim11	0.585951	0	0	0	0	0	0	0	0	0	0	0	0	0	0	0	0	0	0	0
Memo1	0.585502	0	0	0	0	0	0	0	0	0	0	0	0	0	0	0	0	0	0	0
Sult1c2	0	0	0	-1.14239	0	0	0	0	0	0	0	-0.976516	0	0	0	0	0	0	1.11867	0
Mllt3	0	-0.623661	0	-0.993512	0	0	0	0	0	0	0.693266	0	0	0	0	0	0	0	0	0
Gab2	0	0	0	-0.626077	0	0	0	0	0	0	0	0	0	0	0	0	0	0	0	0
Ost4	0	0	0	0	0	0	0	0	0	0	0	0	0	0	0	-0.633089	0	0	0	0
Cx3cl1	0	0	0	0	0	0	0	0	0	0	1.43184	0	0	0	0	0	0	0	1.65174	0
Hes6	0	0	0	0.968553	0	-0.699082	0	0	0	0	0	0	0	0.682039	0	-1.18458	0	0	0	0
Ncald	0	0	0	-0.758724	0	0	0	0	0	0	0	0	0	0	0	0	0	0	0	0
E430018J23Rik	0	0	0	0	0	0	0	0.631512	0	0	0	0	0	0	0	0	0	0	0	0
Cela1	0	0	0.592625	0	0	0	0	0	0	0	-0.877229	0	0	0	0	0	0	0	0	0
Stk10	0	0	0	-0.753971	0	0	0	0	0	0	0	0	0	0	0	0	-0.626539	0	0	0
Bex3	0	-1.93093	0	-2.48881	0	0	0	0	0	0	1.18029	0	0	0	0	0	0	0	0	0
C2	0	0	-0.589682	0	0	0	0	0	0	0	0	0	0	0	0	0	0	0	0	0
Fbln5	0	-1.11829	0	-1.26949	0	0	0	0	0	0	1.01713	0	0.717844	0	0	0	0	0	0	0
Gpr155	0	0	0	0.737329	0	0	0	0	0	0	0	0	0	0	0	0	0	0	0	0
Lims1	0	0	0	-0.699119	0	0	0	0	0	0	0	0	0	0	0	0	0	0	0	0
Gm40923	0	0	1.43889	0	0	0	0	0	0	0	0	0	0	0	0	0	0	0	0	0
Rfc4	0	-1.01955	0	-0.876732	0	0	0	0.629726	0	0	0	0	0	0	0	-0.78153	0	0	0	0
Cep152	0	0	0	-1.20427	0	0	0	0	0	0	0	0	0	0	0	0	0	0	0	0
Ly75	0	-0.928836	0	-1.262	0	0	0	0	0	0	0	0	0	0	0	0	0	0	0	0.745929
Stk26	0	-1.70494	0	-2.058	0	0	0	0	0	0	0	0	0	0	0	0	0	0	0	0
Ms4a1	0	-1.00738	0	-1.43285	0	0	0	0	0	0	0	0	0	0	0	0	0	0	0	0
Plcb2	0	0	0	0	0	0	0	0	0	0	0	0	0	0	0	-0.603962	0	0	0	0.646512
Gspt2	0	-1.55139	0	-2.14835	0	0	0	0	0	0	0	0	0	0	0	0	0	0	0	0
Dedd2	0	0	0	0	0	0	0	0	0	0	0	0	0	0	0	-0.720169	0	0	0	0
Cdhr2	0	0	0	0	0	0	0	0	0	0	0	0	0	0	0	0	0	0	5.2656	0
Podn	0	0	0	0	0	0	0	0	0	0	1.20188	0	0	0	0	0	0	0	0	0
Miga2	0	0.616739	0	0.862733	0	0	0	0.701434	0	0	0	0	0	0	0	0	0	0	0	0
Pard6g	0	-0.704404	0	-1.08768	0	0	0	0	0	0	0	0	0	0	0	0	0	0	0	0
Them7	0	1.46033	0	1.82226	0	0	0	0	0	0	0	0	0	0	0	0	0	0	0	0
Foxm1	0	-3.51253	0	-3.6973	0	0	0	0	0	0	1.9076	0	0	0	0	0	0	0	0	0
Fh1	0	0	0	0.745526	0	0	0	0	0	0	0	0	0	0	0	0	0	0	0	0
Sec62	0	0	0	0	0	0	0	-0.592333	0	0	0	0	0	0	0	0.997149	0	0	0	0
Dennd2a	0	0	0	-0.84473	0	0	0	0	0	0	0	0	0	0	0	0	0	0	0	0
Antxr1	0	-0.964487	0	-1.31351	0	0	0	0	0	0	1.14089	0	0	0	0	0	0	0	0	0
Nup37	0	-0.710671	0	-0.679963	0	0	0	0.76691	0	0	0	0	0	0	0	0	0	0	0	0
Fam89a	0	0	0.664064	-0.603128	0	0	0	0.64759	0	0	0	0.657455	0	0	0	0	0	0	0	0
Antxr2	0	0	0	0	0	0	0	0	0	0	0	0	0	0	0	0.598106	0	0	0	0
Gclc	0	0	0.612515	0	0	0	0	-0.778146	0.654577	0	0	0	0	0	0	0	0	0	0	0
Taf2	0	-0.586275	0	0	0	0	0	0	0	0	0	0	0	0	0	0	0	0	0	0
Plod2	0	-1.27481	0	-1.26782	0	0	0	0	0	0	1.34913	0	0	0	0	0	0	0	0	0
Sltm	0	0	0	0	0	0.599305	0	0	0	0	0	0	0	0	0	0	0	0	0	0
Tacc3	0	-2.37258	0	-2.44463	0	0	0	0	0	0	1.36949	0	0	0	0	0	0	0	0	0
Kcnc3	0	0	-0.670631	0	0	0	0	0	0	0	0	0	0	0	0	0	0	0	0	0
Unc13b	0	0	0	1.91578	0	0	0	-0.943127	0	0	0	0	0	0	0	0	0	0	0	0
Dohh	0	0	0	0	0	0	0	0	0	0	0	0	0	0	0	-0.909059	0	0	0	0
Mup3	0	3.03935	0.599532	3.98306	0	0	0	0	0	0	-1.61156	0	-0.847476	0	0	0	0	0	0	0
Cacnb3	0	0	0	-1.35959	0	0	0	0	0	0	1.20694	0	0	0	0	0	0	0	0	0
Tmem258	0	0	0	0	0	0	0	0	0	0	0	0	0	0	0	-0.711669	0	0	0	0
Serpina3g	0	0	0	-1.0735	0	-0.730497	0	0	0	0	0.629277	0	0	0	0	0	0	0	0	0
Ehd4	0	-0.688897	0	-0.717453	0	0	0	0	0	0	0.638827	0	0	0	0	0	0	0	0	0
Ankrd13b	0	-0.821487	0	-0.942071	0	0	0	0	0	0	0	0	0	0	0	0	0	0	0	0
Napepld	0	0	0	-0.590883	0	0	0	0	0	0	0	0	0	0	0	0	0	0	0	0
Telo2	0	0	0	0	0	0	0	0	0	0	0	0	0	0	0	-0.832962	0	0	0	0
Gbp2	0	0	0	-0.839144	0	0	0	0	0	0	0.599019	0	0	0	0	0	0	0	0	0
Gm47976	0	0	-0.719512	0	0	0	0	0	0	0	0	0	0	0	0	0	0	0	0	0
Palb2	0	-0.86198	0	-1.53757	0	0	0	0	0	0	0	0	0	0	0	0	0	0	0	0
Zfp58	0	0	0	0	0	0	0	0	0	0	0	0	0	0	0	-0.684416	0	0	0	0
Tnxb	0	0	0	0	0	0	0	0	0	0	0.643123	0	0	0	0	0	0	0	0	0
Grap2	0	-0.674103	0	0	0	0	0	0	0	0	1.08685	0	0	0	0	0	0	0	0	0
Prss36	0	0	0	0	0	0	0	0	0	0	0	0	0	0	0	-0.588138	0	0	0	0
Flot2	0	0	0	0	0	0	0	0	0	0	0	0	0	0	0	0	0	0	0	0.598586
Rrbp1	0	0	0	0	0	0	0	-0.601012	0	0	0	0	0	0	0	0	0	0	0	0
Akr1b8	0	0	0	-0.827418	0	0	0	0	0	0	0	0	0	0	0	0	0	0	0	0
Ptgfrn	0	-0.962704	-0.756258	-0.901326	0	0	0	0	0	0	1.11696	0	0	0	0	0	0	0	0.768367	0
Selenop	0	0	0.605921	-0.63936	0	0	0	0	0	0	0	0	0	0	0	0	0	0	0	0
Polr2h	0	0	0	0	0	0	0	0	0	0	0	0	0	0	0	-0.769547	0	0	0	0
Pter	0	0	0	0	0	0	0.629349	0	0	0	0	0	0	0	0	0	0	0	0	0
Bmp6	0	1.10706	0	0.708794	0	0	0	0	0	0	0	0	0	0	0	0	0	0	0	0
Apol9b	0	1.22423	0	1.27954	0	0	0	0	0	0	0	0	0	0	0	0	0	0	0	0
Hoga1	0	0	0	-0.615611	0	0	0	0	0	0	0	0	0	0	0	0	0	0	0	0
Prmt2	0	-0.620921	0	-0.730897	0	0	0	0	0	0	0	0	0	0	0	0	0	0	0	0
Gmpr	0	-1.07823	0	-1.54182	0	0	0	0	0	0	0	0	0	0	0	0	0	0	0	0
Pzp	0	0	0	0	0	0	0	-0.675253	0	0	0	0	0	0	0	0	0	0	0	0
Lipg	0	0	0	0	0	0	0	0	0	0	0	0	0	0	0	1.6165	0	-0.97041	0	0.626075
Mamld1	0	-0.634296	0	-0.662435	0	0	0	0	0	0	0	0	0	0	0	0	0	0	0	0
Spon1	0	-0.622591	0	-0.727073	0	0	0	0	0	0	1.07293	0	0	0	0	0	0	0	0	0
Cldn15	0	0	0	0	0	0	0	0	0	0	0	0	0	0	0	0	0	0	3.70065	0
Otub2	0	0	0	-0.604769	0	0	0	0	0	0	0	0	0	0	0	0	0	0	0	0
Tmem164	0	0	0	-0.671753	0	0	0	0	0	0	0	0	0	0	0	0	0	0	0	0
B4galt4	0	-0.624578	0	-1.13493	0	0	0	0	0	0	0	0	0	0	0	-0.672376	0	0	0	0
Hipk2	0	0	0	0	0	0	0	0	0	0	0	0	0	0	0	0.710187	0	0	0	0
Myl3	0	0	0	0	0	0	0	5.40694	0	0	0	0	0	0	0	0	0	0	0	0
Synm	0	0	0	0	0	0	0	1.37828	0	0	0	0	0	0	0	0	0	0	0	0
Cftr	0	0	0	0	0	0	0	0	0	0	0	0	0	0	0	0	0	0	3.01887	0
Btbd19	0	0	0	0	0	0	0	0	0	0	0	0	0	0	0	-0.739761	0	0	0	0
Vangl2	0	-1.2773	0	0	0	0	0	0	0	0	0	0	0	0	0	0	0	0	0	0
Tns1	0	0	-0.671812	0	0	0	0	0	0	0	0	0	0	0	0	0.61001	0	0	0	0
Plat	0	-0.960421	0	0	0	0	0	0	0	0	2.16108	0	0	0	0	0	0	0	0	0
Sspn	0	0	0	0	0	0	0	0.854475	0	0	1.10192	0	0	0	0	0	0	0	0	0.721
Slc7a5	0	-0.743003	0	-0.983928	0	0	0	0	0	0	0	0	0	0	0	0	0	0	0	0.83869
Vwa8	0	0	0	0	0	0	0	0	0	0	0	0	0	0	0	0.835659	0	0	0	0
Cpm	0	0	0	-0.881956	0	0	0	0	0	0	0	0	0	0	0	0	0	0	0	0
Cep72	0	-1.41367	0	-1.66277	0	0	0	0	0	0	1.17003	0	0	0	0	0	0	0	0	0
Ccdc88a	0	-0.900931	0	-1.3658	0	0	0	0	0	0	0.879495	0	0	0	0	0	0	0	0	0
Ggt5	0	0.6413	0	0	0	0	0	0	0	0	0	0	0	0	0	0	0	0	0	0
Rad51c	0	-0.934388	0	-0.975868	0	0	0	0	0	0	0	0	0	0	0	0	0	0	0	-1.75368
Mertk	0	0	0	0	0	0	0	0	0	0	0	0	0	0	0	0	0	-0.668706	0	0
Arl2bp	0	-0.76533	0	0	0	0	0	0	0	0	0.764119	0	0	0	0	0	0	0	0	0.820138
Slbp	0	-0.665077	0	-0.76855	0	0	0	0	0	0	0	0	0	0	0	0	0	0	0	0
Slc25a20	0	0	0	0	0	0	0	0	0	0	0	0	0	0	0	0.901695	0	0	0	0
Saa4	0	0.608616	0	0.98061	0	0	0	0	0	0	0	0	-0.83738	0	0	1.09373	0	0	-0.796588	0
Tmed5	0	0	0	0	0	0	0	0.731814	0	-0.653541	0	0	0	0	0	0	0	0	0	0
Mtmr7	0	0	0	0.901182	0	0	0	0	0	0	0	0	0	0	0	0	0	0	0	0
Zfp462	0	-0.613024	0	-0.95123	0	0	0	0	0	0	0	0	0	0	0	0	0	0	0	0
Trim30a	0	0	0	-0.742302	0	0	0	0	0	0	0	0	0	0	0	0	-0.611188	0	0	0
Runx1	0	0	0	0	0	0	0	0	0	0	1.1493	0	0	0	0	0	0	0	0	0
Col27a1	0	0	0	1.64929	0	0	0	0	0	0	0	0	0	0	-0.762087	-0.688745	0	-1.30255	0.770975	0
Ctse	0	0	0	0	0	0	0	0	0	0	1.24116	0	0	0	0	0	0	0	0	0
Smyd4	0	-0.823295	0	-0.686198	0	0	0	0	0	0	0	0	0	0	0	0	0	0	0	0
Rtl8b	0	0	0	-0.597094	0	0	0	0	0	0	0	0	0	0	0	-0.677416	0	0	0	0
Slc25a34	0	0.670255	0	0	0	0	0	0.622911	0	0	0	0	0	0	0	0	0	0	0	-0.657415
Cd209f	0	-4.81348	0	-5.25383	0	0	0	0	0	0	0	0	0	0	0	0	0	0	0	0
Fbxw4	0	0	0	0.600174	0	0	0	0	0	0	0	0	0	0	0	0	0	0	0	0
Panx1	0	-1.21406	0	-1.59147	0	0	0	0	0	0	0	0	0	0	0	0	0	0	0	0
Trpm4	0	-2.03196	0	-2.25176	0	0	0	0.658175	0	0	0	0	0	0	0	0	0	0	1.33713	0
Mx1	0	0	-0.791265	0	0	0	0	0	0	0	0	0	0	0	0	0	0	0	0	0
Sertad1	0	0	0	0	0	0	0	0	0	0	0	0	0	0	0	0	0.630696	0	0	0
Zkscan3	0	0	0	0	0	0	0	0.642083	0	0	0	0	0	0	0	0	0	0	0	0
Fgfrl1	0	0	0	0	0	0	0	0	0	0	0	0	0	0	0	0	0.812692	0	0.602247	0.671793
Marcksl1	0	0	0	-1.02544	0	0	0	0	0	0	0	0	0	0	0	-0.673852	0	0	0	0
Ckap4	0	-1.20667	0	-1.63938	0	0	0	0	0	0	0.820715	0	0	0	0	0	0	0	0	0
Rgl1	0	-0.611795	0	-1.00459	0	0	0	0	0	0	0	0	0	0	0	0	0	0	0	0
Adh4	0	0.889183	0.631148	1.5164	0	0	0	0	0	0	0	0	0	0	0	0	0	0	0	0
Tmem119	0	-0.860798	-1.03786	0	0	0	0	0	0	0	1.1962	0	0	0	0	0	0	0	0	0
Trim44	0	0	0	0	0	0	0	0	0	0	0	0	0	0	0	0	0	-0.596399	0	0
Cdip1	0	0	0	-0.595728	0	-0.665423	0	0	0	0	0	0	0	0	0	0	0	0	0	0
Ctsc	0	0.966919	0	0	0	0	0	0	0	0	0	0	0	0	0	0	-0.748311	0	0	0
Rps12-ps4	0	0	2.0697	0	0	0	0	0	0	0	0	0	0	0	0	0	0	0	0	0
Bhmt-ps1	0	0	0.677409	0	0	0	0	0	0	0	0	0	0	0	0	0	0	0	0	0
Pclaf	0	-3.56989	0	-4.30266	0	0	0	0	0	0	0	0	0	0	0	0	0	0	0	0
Setdb2	0	-0.888669	0	-0.616749	0	0	0	0	0	0	0.661282	0	0	0	0	0	0	0	0	0
Meiob	0	0	0	0.64788	0	0	0	0.735144	0	0	0	0	0	0	0	-0.765976	0	0	0	0
Gypc	0	0	0	-1.30145	0	0	0	0	0	0	0	0	0	0	0	0	0	0	0	0
Pnrc1	0	0	0	0	0	0	0	0	0	0	0	0.60815	0	0	0	0	0	0	0	0
Cox7a2	0	0	0	0	0	0	0	0	0	0	0	0	0	0	0	-0.687055	0	0	0	0
Gpx3	0	0	0	0	0	0	0	0	0	0	1.26175	0	0	0	0	0	0	0	0	0
Adap1	0	0	0	0	0	0	0	0.656833	0	0	0	0	0	0	0	0	0	0	1.15136	0
Trhde	0	0	1.02954	5.57063	0	0	0	0	0	0	0	0	0	0	0	0	0	0	0	0
Tnik	0	0.649781	0	0	0	0	0	0	0	0	0	0	0	0	0	0	0	0	0	0
Ankrd54	0	0	0	0	0	0	0	0	0	0	0	0	0	0	0	-0.753139	0	0	0	0
Themis	0	0	0	0	0	0	0	0	0	0	0	0	1.43341	0	0	1.48617	0	0	0	1.85158
Ddx11	0	0	0	-0.610457	0	0	0	0	0	0	0	0	0	0	0	0	0	0	0	0
Igfbp3	0	-1.55015	0	-1.92588	0	0	0	0	0	0	0	0	0	0	0	0	0	0	0	0
Eif1a	0	0	0	0	0	0	0	0.831713	0	0	0	0	0	0	0	0	0	0	0	0
Agxt	0	0	0	-0.703795	0	0	0	0	0	0	0	0	0	0	0	0	0	0	0	0
Ap3m1	0	0	-0.633423	0.614514	0	0	0	0	0	0	0	0	0	0	0	0	0	0	0	0
Srebf1	0	0	0	0	0	-0.613613	0	0	0	0	0	-0.943896	0	0.644126	0	-1.20792	0.605517	0	0	0.818386
Mfsd10	0	0	0	0	0	0	0	0	0	0	0	0	0	0	0	-0.780926	0	0	0	0
Rorc	0	0	0	0	0	0	0	0	0	0	0	0	0.786137	0	0	0	0	0	0	0
Pcgf2	0	-0.850309	-0.618272	0	0	0	0	0	0	0	1.1396	0	0	0	0	-0.615745	0	0	0	0
Fanca	0	-2.95936	0	-2.3724	0	0	0	0	0	0	0	0	0	0	0	0	0	0	0	0
Trim59	0	-2.86806	0	-3.2166	0	0	0	0	0	0	0	0	0	0	0	0	0	0	0	0
Tc2n	0	-0.699699	0	0	0	0	0	0	0	0	0	0	0	0	0	0	0	0	0	0
Ctla2a	0	-0.604204	0	-0.873624	0	0	0	0.590249	0	0	0	0	0	0	0	0	0	0	0	0
Ngef	0	0	0	0	0	0	0	0	0	0	0	-0.921384	0	0	0	-0.718956	0	0	1.07026	0
Tk1	0	0	0	-1.17194	0	0	0	0	0	0	0	-0.690333	0.836275	0	0	-1.06918	0	0	0.985478	0
Cyp2a4	0	2.48851	-1.8871	-3.5571	0	0	0	0	0	0	0	0	4.28323	1.16038	1.98908	0	0	0	-0.748141	0
Mesd	0	0	0.588528	-0.670217	0	0	0	0	0	0	0	0	0	0	0	0	0	0	0	0
Dusp8	0	0	-0.779288	0	0	0	0	0	0	0	0	1.22351	0	0	0	0	0	0	0	-1.23635
Tceal8	0	-1.31711	-0.731298	-1.98124	0	0	0	0	0	0	0.766804	0	0	0	0	0	0.793138	0	0	0
Cemip2	0	-0.624055	0	-0.854004	0	0	0	0	0	0	0	0	0	0	0	0	0	0	0	0
Mthfd1	0	0	0	0	0	0	0	-0.599519	0	0	0	0	0	0	0	0	0	0	0	0
Wfdc1	0	0	0	-0.592286	0	0	0	0	0	0	0	0	0	0	0	-0.943984	0	0	0	0
Nucb2	0	0	-0.726098	0	0	0	0	0	0	0	0	0	0	0	0	0	-1.74997	0	0	0
Ncoa4	0	0	0	0	0	0	0	0	0	0	0	0	0	0	0	0.68444	-0.704705	-0.748694	0	0
Il33	0	0	0	-0.638602	0	0	0	0	0	0	0	0	0	0	0	0	0	0	0	0
Prps2	0	0.681454	0	0	0	0	0	0	0	0	0	0	0	0	0	0	0	0	0	0
Clu	0	0	0	1.05489	0	0	0	-0.721365	0	0	0	0	0	0	0	0	0	0	0	0
Gdf2	0	0	0	-0.94951	0	0	0	0	0	0	0	0	0	0	0	0	0	0	0	0
Nup43	0	0	0	0	0	0	0	0.644855	0	0	0	0	0	0	0	0	0	0	0	0
Fermt1	0	0	0	0	0	0	0	0	0	0	0	0	0	0	0	0	0	0	1.7268	0
Rabl2	0	-0.624595	0	-0.764743	0	0	0	0	0	0	0	0	0	0	0	0	0	0	0	0
Cbx6	0	-0.856912	0	-1.14122	0	0	0	0	0	0	0.704215	0	0.939393	0	0	0	0	0	0	0
Cct6b	0	0	0	0	0	0	-1.5921	0	0	0	0	0	0	0	0	0	0	0	0	0
Lama1	0	0	0	-0.81763	0	0	0	0	0	0.789922	0	0	0	0	0	0	0	0	0	0
Cldn1	0	-1.06759	0	-0.80906	0	0	0	0	0	0	0	0	0	0	0	0	0	0	0	-0.729578
Lrrc8c	0	0	-0.612441	-0.825077	0	0	0	0	0	0	0	0	0	0	0	0.604188	-0.64849	0	0	0
Igf2bp3	0	-8.84405	0	-7.67152	0	0	0	0	0	0	0	0	0	0	0	0	0	0	0	0
Ctps2	0	-0.69312	0	-0.926543	0	0	0	0	0	0	0	0	0	0	0	0	0	0	0	0
Aebp1	0	-0.820064	0	-0.966017	0	0	0	0	0	0	1.38661	0	0	0	0	0	0	0	0	0
Josd2	0	0	0	0	0	0	0	0.619572	0	0	0	0	0	0	0	-0.857399	0	0	0	0
Pcyt2	0	0	0	0	0	0	0	0	0	0	0	0	0	0	0	-0.630382	0	0	0	0
Rsad2	0	-0.811233	-0.683868	-0.886609	0	0	0	0	0	0	0.925164	0	0	0	0	0.963025	0	0	0	0
Rasgef1b	0	0	-0.865304	0	0	0	-0.610499	0	0	0	0	0	0	0	0	0	0	0	0	0
Rnf43	0	0	0	0	0	0	0	0	0	0	0	0	0	0	0	0	0.640193	0	0.773519	0.794928
Efemp1	0	1.04811	0	0.884219	0	0	0	0	0	0	0	0	0	0	0	0	0	0	0	0
Map3k13	0	0	0	0	0	0	0	0	0	0	0	0	0	0	-0.831817	0.802367	-0.806254	0	0	0
Arf6	0	-0.644373	0	0	0	0	0	0	0	0	0	0	0	0	0	0	0	0	0	0
Htra1	0	0	0	0	0	0	0	0	0	0	1.14771	0	0	0	0	0	0	0	0	0
Gm35339	0	0	0	0	0	0	0	0	0	0	0	0	0	0	0	-1.00033	0	0	0	-0.979007
Atg9a	0	0	0	0	0	0	0	0	0	0	0	0	0	0	0	0	0	-1.10445	0	0
Mfsd4b1	0	0.604246	0	0	0	0	0	0	0	0	0	0	0	0	0	0	0	0	0	0
Srgap1	0	-1.05865	0	-1.24454	0	0	0	0	0	0	0	0	0	0	0	0	0	0	0	0
Eid1	0	-0.910793	-0.637898	-0.941827	0	0	0	0	0	0	1.14682	0	0	0	0	-0.840119	0	0	0	0
Scd1	0	0.768412	0	1.2149	0	0	0	0	0	0	0	0	-0.671933	0	0	0	0	0	0	-0.646919
Akr1b10	0	-0.673761	-0.618742	-0.849311	0	0	0	0	0	0	0	0	0	0	0	-0.744647	0	0	0	0
Acsl6	0	0	0	0	0	0	0	0	0	0	0	0	0	0	0	-1.24493	0	0	0	0
Bub1	0	-4.14741	0	-4.24339	0	0	0	0	0	0	0	0	0	0	0	0	0	0	0	0
Klrk1	0	0	0	0	0	0	0	0	0	0	0	0	0	0	0	-1.15125	0	0	0	0
Tent5c	0	-0.778529	0	-0.698302	0	0	0	0	0	0	0	0	0	0	0	1.11403	-0.737521	0	0	0
Abhd17a	0	0	0	0	0	0	0	0	0	0	0	0	0	0	0	-0.627253	0	0	0	0
Zfp354b	0	0.640365	0	0	0	0	0	0.768525	0	0	0	0	0	0	0	0	0	0	0	0
Cnpy2	0	0	0	0	0	0	0	0	0	0	0	0	0	0	0	-0.610839	0	0	0	0
Rftn1	0	0	0	-0.694502	0	0	0	0	0	0	0	0	0	0	0	0	0	0	0	0
Gbp7	0	0	0	-0.647787	0	0	0	0	0	0	0	0	0	0	0	0	0	0	0	0
Scamp5	0	-0.904215	0	0	0	0	0	0	0	0	0.669353	0	0	0	0	0	0	0	0	0
Hacd4	0	0	0	-0.814494	0	0	0	0	0	0	0	0	0	0	0	0	0	0	0	0
Got1	0	0	-0.888224	0	0	0	0	-1.00975	0	0	0	0	0	0	0	0	-0.591746	0	0	-0.611645
Mapkapk3	0	0	0	0	0	0	0	-0.653464	0	0	0.840302	0	0	0	0	0	0	0	0	0
Olfml2b	0	0	0	-1.25996	0	0	0	0	0	0	0	0	0	0	0	0	0	0	0	0
Plppr1	0	-1.74765	0	0	0	0	0	0	0	0	0	0	0	0	0	0	0	0	0	0
Ppie	0	0	0	0	0	0	0	0	0	0	0	0	0	0	0	-0.588308	0	0	0	0
Casq2	0	0	0	0	0	0	0	3.55968	0	0	0	0	0	0	0	0	0	0	0	0
Cbx4	0	0	0	0	0	0	-0.707674	0	0	0	0	0	0	0	0	0	0	0	0	0
Acsl1	0	0	0	0	0	0	0	0	0	0	0	0	0	0	0	0.668731	0	0	0	0
Trim14	0	0	0	0	0	0	0	0	0	0	0	0	0	0	0	0	-0.665757	0	0	0
Fntb	0	0	-0.622473	0	0	0	0	0	0	0	0	0	0	0	0	0	0	0	0	0
Grb10	0	-2.93934	0	-2.50554	0	0	0	0	0	0	1.15042	0	0	0	0	-1.56851	0	0	0	0
Pmepa1	0	0	0	0	0	0	0	0	0	0	0.947105	0	0	0	0	-0.942522	0	0	0	0
Nos3	0	0	0	0	0	0	0	0	0	0	0	0	0	0	0	-0.761325	0	0	0	0
Chic1	0	0	0	-0.902301	0	0	0	0.814456	0	0	-0.763395	0	0	0	0	0	-0.636352	0	0	0
Smim1	0	0	0	-0.896211	0	0	0	0	0	0	0	0	0	0	0	-0.722857	0	0	0	0
Hsf4	0	0	0	0	0	0	0	0	0	0	0	0	0	0	0	-0.626484	0	0	0	0
Acpp	0	2.28227	0	2.43769	0	0	0	0	0	0	-1.16162	0	-1.71618	0	0	0	0	0	0	0.77614
Cpz	0	-1.48718	0	-1.66134	0	0	0	0	0	0	1.28647	0	0	0	0	0	0	0	0	0
Lipo3	0	0	0	-0.761249	0	0	0	0	0	0	0	0	0	0	0	-0.621801	0	0	0	0
Xbp1	0	0	0	0	0	0	0	0	0	0	0	0	0	0	0	-0.678074	0	0	0	0
Leng8	0	0	0	0	0	0	0	0.682507	0	0	0	0	0	0	0	0	0	0	0	0
Iqgap3	0	-3.71397	0	-3.74232	0	0	0	0	0	0	2.168	0	0	0	0	0	0	0	0	0
Fry	0	-0.916308	0	-1.05049	0	0	0	0	0	0	0	0	0	0	0	0	0	0	0	0
Hnrnpa1	0	0	0	-0.737454	0	0	0	0	0	0	0	0	0	0	0	0	0	0	0	0
Cox20	0	0	0	0	0	0	0	0	0	0	0	0	0	0	0	-0.609471	0	0	0	0
Hmga1	0	0	0	-0.5921	0	0	0	0	0	0	0	0	0	0	0	0	0	0	0	0
Rnase6	0	0	0	0	0	0	0	0	0	0	1.26296	0	0	0	0	-0.814278	0	0	0	0
Arl15	0	0	0	0.756508	0	0	0	0	0	0	0	0	0	0	0	0	0	0	0	0
Paqr9	0	0.74908	0	0.624894	0	0	0	0.886433	0	0	-0.618225	0.832801	0	0	0	0	0	0	0	0
Pid1	0	0	0	0	0	0	0	0	0	0	0	0	0	0	0	0.737334	0	0	0	0
Pygo1	0	0	0	-3.14116	0	0	0	0.835966	0	0	0	0	0	0	0	0	0	0	0	0
Akr1c14	0	0	0	0	0	0	0	0	0	-0.593955	0	0	0	0	0	0	0	0	0	0
Tamm41	0	0	0	-0.625521	0	0	0	0	0	0	0	0	0	0	0	0	0	0	0	0
Tnfaip8	0	-0.63779	0	-0.923338	0	0	0	0	0	0	0.855905	0	0	0	0	0	0	0	0	0
Colec10	0	0	0	0	0	0	0	0	0	0	-0.745177	0	-0.825928	0	0	0	0	0	0	0
Pla2g6	0	0	0	0.967388	0	0	0	0	0	0	0	0	0	0	0	0	0	0	0	0
Gbp8	0	0	0	0	0	0	0	0	0	0	0	0	0	0	0	-1.46768	-0.702294	0	0	0
Fn1	0	0	0	0	0	0	0	0	0	0	0	0	0	0	0	0.992871	0	0	0	0
Tnnt1	0	0	0	-0.704756	0	0	0	1.12809	0	0	0	0	0	0	-1.14792	0	0	0	0	0
Hk3	0	0	0	-0.727645	0	0	0	0	0	0	0	0	0	0	0	-0.896075	0	0	0	0
Eln	0	-4.59815	0	-4.58221	0	0	0	0	0	0	2.60434	0	1.29325	0	0	-0.686665	0	0	0	0
Zmat3	0	0	-0.643777	0	0	0	0	0	0	0	0	0	0	0	0	0	0	0	0	0
Lrat	0	0	0	0	0	0	0	0	0	0	0	0	0	0	0	-0.607381	0	0	0	0
Cd84	0	0	0	0	0	0	-1.26105	0	0	0	0.789283	0	0	0	0	0	0	0	0	0
Parvb	0	-0.767982	-0.888287	-0.926385	0	0	0	0	0	0	0	0	0	0	0	-0.684681	0	0	0	0
Cyp2c39	0	1.4135	0	-1.75339	0	0	0	0	0	0	0	0	0	0	0	1.1471	0	0	0	0.771713
Cdk6	0	-0.695838	0	0	0	0	0	0	0	0	0.662639	0	0	0	0	0	0	0	0	0
Cxcl10	0	0	0	-0.759117	0	0	0	0	0	0	0	0	0	0	0	0	0	0	0	0
Gm11273	0	0	0.596533	0	0	0	0	0	0	0	0	0	0	0	0	0	0	0	0	0
Nphp3	0	0	0	0	0	0	0	0.618976	0	0	0	0	0	0	0	0	0	0	0	0
Ybx3	0	0	0	-0.848593	0	0	0	0	0	0	0	0	0	0	0	0	0	0	0	0
Osgin2	0	-0.698053	0	-0.830377	0	0	0	0	0	0	0	0	0	0	0	0	-0.682557	0	0	0
Zfp882	0	0	0	0	0	0	0	0.614222	0	0	0	0	0	0	0	0	0	0	0	0
Slc15a2	0	0	0	0	0	0	0	1.13951	0	0	0	0	0	0	0	-3.75384	-0.797944	0	0	-0.820596
Clic5	0	-1.18047	0	0.633353	0	0	0	0	0	0	1.21474	0	0	0	0	0	0	0	1.57203	0
Egfl7	0	-0.667902	0	-1.13327	0	0	0	0	0	0	0	0	0	0	0	0	0	0	0	0
Adgrg1	0	-0.802063	-0.602927	-0.93949	0	0	0	0	0	0	0.788682	0	0	0	0	0	0	0	0	0
Med28	0	0	0	0	0	0	0	0	0	0	0	0	0	0	0	-0.791796	0	0	0	0
Col13a1	0	0	0	-0.601543	0	0	0	0	0	0	0	0	0	0	0	0	0	0	0	0
Entpd1	0	0	0	0	0	0	0	0	0	0	0	0	0	0	0	0	-0.757949	0	0	0
Cep85	0	0	0	0	0	-0.59355	0	0	0	0	0	0	0	0	0	0	0	0	0	0
Pou2f2	0	0	-0.714153	0	-1.27684	-0.853226	0	0	0	0	0	0	0	0	0	0	-0.70828	0	0	0
Osbpl8	0	0	0.614712	0	0	0	0	0	0	0	0	0	0	0	0	0	0	0	0	0
Tmem238	0	0	0	0	0	-0.742156	0	0	0	0	0	0	0	0	0	0	0	0	0	0
Slc7a2	0	0	0	0.741642	0	0	0	-0.649776	0	0	0.73456	0	0	0	0	0	0	0	0	0
Mgat4a	0	0	0	0	0	0	0	0	0	0	0	0	0	0	0	0	0	0	2.0588	0
Cdk5rap1	0	0	0	0	0	0	0	-1.29033	0	0	0	0	0	0	0	0	-0.686979	0	0	0
Gm10680	0	0	2.28207	0	0	0	0	0	0	0	0	0	0	0	0	0	0	0	0	0
Dnase1l2	0	0	0	0	0	0	0	0	0	0	0	0	0	0	0	-1.3628	0	0	0	0
Fgfr1	0	0	-1.07469	0.777243	0	0	0	0	0	0	0.877036	0	0	0.963165	0	-0.626426	0	0	0	0
Tspan4	0	0	0	0	0	-0.842062	0	0	0	0	0	0	0	0.672595	0	0	0	0	0	0.616723
Pik3cg	0	0	0	-0.816666	0	0	0	0	0	0	0	0	0	0	0	0	0	0	0	0
Ces4a	0	-2.40212	-1.27218	-1.68052	0	0	0	0	0	0	0	0	-2.07191	0	0	0	0	0	0	0
Eef2k	0	0	0	0	0	0	0	0	0	0	0	-0.69718	0	0	0	-0.814788	0	0	0	0
Zbtb45	0	0	0	-0.769287	0	0	0	0	0	0	0	0	0	0	0	0	0	0	0	0
Hist1h4c	0	0	0.718626	0	0	0	0	0	0	0	0	0	0	0	0	0	0	0	0	0
Fgl1	0	0.626442	0	0	0	0	0	0.747617	0	0	0	0	-0.895809	0	0	0	-1.39536	0	0	0
Lpxn	0	0	0	0	0	0	0	0	0	0	0	0	0	0	0	-0.649965	0	0	0	0
Fcgr4	0	0	0	0	0	0	-0.763592	0	0	0	0	0	0	0	0	0	-0.721985	0	0	0
Dnajb1	0	0	0	0	0	0	0	0	0	0	0	0.619098	0	0	0	-0.875291	0	0	0	0
Flnc	0	0	0	0	0	0	0	1.94673	0	0	0	0	0	0	0	0	0	0	0	0
Cep78	0	-0.636653	0	0	0	0	0	0.766001	0	0	0	0	0	0	0	-0.612237	0	0	0	0
Lox	0	-3.17725	0	-2.76572	0	0	0	0	0	0	2.22485	0	0	0	0	0	0	0	0	0
Ehd2	0	-0.972076	0	-1.06339	0	0	0	0	0	0	0.834943	0	0	0	0	0	0	0	0	0
Cd79b	0	-0.920092	0	-1.40208	0	0	0	0	0	0	1.06328	0	0	0	0	0	0	0	0	0
Clec4a3	0	0	0	0	0	-0.762011	0	0	0	0	0	0	0	0	0	-0.669114	-0.660678	0	0	0
Gm40787	0	0	0.773768	0	0	0	0	0	0	0	0	0	0	0	0	0	0	0	0	0
Tmem126b	0	0	0	0	0	0	0	0	0	0	0	0	0	0	0	-0.609555	0	0	0	0
Dync2li1	0	-0.707961	0	0	0	0	0	0	0	0	1.30754	0	1.14701	0	0	0	0	0	0	0
Lrit2	0	2.7644	0	3.16946	0	0	0	0	0	0	0	0	0	0	0	0	0	0	0	0
Cmc4	0	0	0	0	0	0	0	0	0	0	0	0	0	0	0	-0.700062	0	0	0	0
Ccnb1	0	-4.22701	0	-3.85833	0	1.67279	0	0	0	0	2.88658	0	0	0	0	0	0	0	0	0
Nat8f5	0	0	0	7.29761	0	0	0	0	0	0	0	0	0	0	0	0	0	0	0	0
Zfp764	0	0	0	-0.690553	0	0	0	0	0	0	0	0	0	0	0	0	0	0	0	0
Wls	0	0	0	-0.835503	0	0	0	0	0	0	0	0	0	0	0	0	0	0	0	0
P2ry4	0	0	0	-0.648563	0	0	0	0	0	0	0	0	0	0	0	0	0	0	0	0
Slc16a13	0	1.55927	0	1.81759	0	0	0	0	0	0	-1.45223	0.723156	0	0	0	0	0	0	0	0
Rcc1	0	-0.608972	0	-0.683791	0	-0.79224	0	0	0	0	0	0	0	0	0	0	0	0	0	0
Krt23	0	-1.48167	0	-2.00253	0	0	0	0	0	0	2.71999	-1.44675	1.51089	0	0	0	1.03915	0	0	-0.825765
Xrcc2	0	-1.10122	0	-1.22176	0	0	0	0	0	0	0	0	0	0	0	0	0	0	0	0
Rab34	0	-1.03026	0	0	0	0	0	0	0	0	0	0	0	0	0	0	0	0	0	0
Glce	0	0	0	0	0	0	0	0	0	0	0	0	0	0	0	0.683034	0	0	0	0
Poli	0	0	0	0	0	0	0	0	0	0	0	0	0	0	0	-0.970791	0	0	0	0
Scarf1	0	0	0	0	0	0	0	0	0	0	0	0	0	0	0	-0.826722	0	0	0	0
Hs3st6	0	0	0	0.813472	0	0	0	0	0	0	0	0	0	0	0	0	0	0	0	0
Gskip	0	0	0	0	0	0	0	0	0	0	0	0	0	0	0	0.710196	0	0	0	0
Mogat1	0	0	0	0	0	0	0	0	0	0	0	0	0	0	0	0.945552	1.54643	0	0	0.850373
Ogt	0	0	0	0	0	0	0	0	0	0	0	0	0	0	0	0	0	0	0.600036	0
Rasip1	0	0	0	-0.972357	0	0	0	0	0	0	0	0	0	0	0	0	0	0	0	0
Sestd1	0	0	0	0	0	0	0	0	0	0	0.807967	0	0	0	0	0	0	0	0	0
Ift80	0	-0.615495	0	-0.820449	0	0	0	0	0	0	0	0	0	0	0	0	0	0	0	0
Slc10a2	0	3.73852	0	4.50913	0	0.73437	0	0	0	0	1.18753	0	0	0	0	0	-0.787857	0	-0.634339	-0.706155
Enpp5	0	0	0	0.639998	0	0	0	0	0	0	0	0	0	0	0	0	0	0	0	0
Iqcb1	0	0	0	0	0	0	0	0	0	0	0	0	0	0	0	-0.775399	0	0	0	0
Gpd2	0	0	0	-0.619445	0	0	0	0	0	0	0	0	0	0	0	0	0	0	0	0
Mterf2	0	0	0	0	0	0	0	1.05452	0	0	0	0	0	0	0	0	0	0	0	0
2210039B01Rik	0	0	0.742292	0	0	0	0	0	0	0	0	0	0	0	0	0	0	0	0	0
Ctc1	0	0	0	-0.595227	0	0	0	0	0	0	0	0	0	0	0	0	0	0	0	0
Tmem51	0	0	0	0	0	0	0	0	0	0	0	0	0	0	0	-0.953366	0	0	0	0
Arhgap27	0	0	0	-0.694254	0	0	0	0	0	0	0	0	0	0	0	0	0	0	0	0
Tspan7	0	-0.745177	0	-1.16855	0	0	-0.595674	0	0	0	0	0	0	0	0	0	0	0	0	0
Cdc25a	0	0	0	-0.765934	0	0	0	0	0	0	0	0	0	0	0	0	0	0	0	0
Mettl15	0	-0.656241	0	-0.736108	0	0	0	0	0	0	0	0	0	0	0	0	0	0	0	0
Rnd1	0	0.78633	0	0.649081	0	0	0	0	0	0	0	0	0	0	0	-0.603909	-0.752494	0	0	0
Ocrl	0	0	-0.65397	0	0	0	0	0	0	0	0	0	0	0	0	0	0	0	0	0
Dtx3l	0	0	0	0	0	0	0	0	0	0	0	0	0	0	0	0.628719	0	0	0	0
Drc1	0	0	-0.586976	0	0	0	0	0	0	0	0	0	0	0	0	0	-0.634079	0	0	0
Cenpq	0	-0.978045	0	-1.17058	0	0	0	0	0	0	0	0	0	0	0	0	0	0	0	0
Itgb2	0	0	0	0	0	-0.732955	-0.724394	0	0	0	0	0	0	0	0	0	-0.687344	0	0	0
Gm19572	0	0	-1.70678	0	0	0	0	0	0	0	0	0	0	0	0	0	0	0	0	0
Angpt2	0	-0.73075	0	-0.654422	0	0	0	0	0	0	0	0	0	0	0	0	0	0	0	0
Pltp	0	1.37904	0	0.740167	0	0	0	0	0	0.826968	-0.912011	0.652029	0	0	0	0	1.3528	0	0	0
Gm43305	0	0	-1.89313	0	0	0	0	0	0	0	0	0	0	0	0	0	0	0	0	0
Naip1	0	0	0	0	0	0	0	0	0	0	0	0.677274	0	0	0	0	0	0	1.25664	0
Dixdc1	0	0	0	-0.637686	0	0	0	0	0	0	0	0	0	0	0	0	0	0	0	0
Spata6	0	-0.638387	0	-1.06078	0	0	0	0	0	0	0	0	0	0	0	0	0	0	0	0
Elf3	0	0	0	0	0	0	0	0	0	0	0	0	0	0	0	0	0	0	1.4791	0
2610008E11Rik	0	0	0	0	0	0	0	0.607314	0	0	0	0	0	0	0	0	0	0	0	0
Arhgef25	0	-0.812336	0	-0.948044	0	0	0	0	0	0	0	0	0	0	0	0	0	0	0	0
Fen1	0	-1.11419	0	-1.06643	0	0	0	0	0	0	0	0	0	0	0	0	0	0	0	0
Fabp3	0	0	0	0	0	0	0	3.89109	0	0	0	0	0	0	0	0	0	0	0	0
Tmem120b	0	0	0	1.04118	0	0	0	0	0	0	0	0	0	0	0	-0.937169	0	0	0	0
Pask	0	-2.14735	0	-1.91819	0	0	0	0	0	0	0	0	0	0	0	0	0	0	0	0
Arl4d	0	0	0	0	0	0	0	0	0	0	0	0	0.941595	0.967463	0	0	0	0	0	0.775867
Kif26a	0	-0.988584	0	-1.26914	0	0	0	0	0	0	0	0	0	0	0	0	0	0	0	0
Gstp2	0	0	0.669905	2.34321	0	0	0	0	0	0	0	0	0	0	0	-1.08761	-0.629329	0	0	0
Lpin3	0	0	0	0	0	0	0	0.605915	0	0	0	0	0	0	0	0	0	0	0	0
Tle6	0	0	0	0	0	0	0	-0.635743	0	0	0	0	0	0	0	0	0	0	0	0
P2ry10b	0	-0.59036	0	0	0	0	0	0	0	0	0	0	0	0	0	0	0	0	0	0
Tubb4b	0	0	0	0	0	0	0.654386	0	0	0	0	0	0	0	0	0	0	0	0	0
Klhl3	0	0	0	-0.68918	0	0	0	0	0	0	0	0	0	0	0	0	0	0	0	0
Scfd1	0	0	0	0	0	0	0	0.640179	0	0	0	0	0	0	0	0	0	0	0	0
Cmya5	0	0	0	0	0	0	0	3.91203	0	0	0	0	0	0	0	0	0	0	0	0
Ccm2l	0	-0.763938	0	-0.779892	0	0	0	0	0	0	0	0	0	0	0	-0.599959	0	0	0	0
Smc2	0	-1.91489	0	-2.07849	0	0	0	0	0	0	1.15875	0	0	0	0	0	0	0	0	0
Itga2b	0	-0.720035	0	-0.802426	0	0	0	0	0	0	0	0	0	0	0	0	0	0	0	0
Galnt18	0	-0.778779	0	-1.12903	0	0	0	0	0	0	0	0	0	0	0	0	0	0	0	0
Sdf2l1	0	0	0	0	0	0	0.819025	0	0	0	-0.683441	0	0	0	0	-0.727205	-0.680356	0	-0.63124	-0.711241
Ccl6	0	0	0	0	0	0	0	0	0	0	0	0.585886	0	0	0	0	-0.880272	0	0	0
Sap30	0	0	0	0	0	0	0	0	0	0	0	0	0	0	0	-0.691689	0	0	0	0
Cip2a	0	-2.69146	0	-2.75297	0	1.0977	0	0	0	0	1.77804	0	0.935307	0	0	0	0	0	0	0
AU020206	0	0	-0.745275	0	0	0	0	0	0	0	0	0	0	0	0	0	0	0	0	0
Bpgm	0	-1.05651	0	0	0	0	0	0	0	0	0	0.623333	0	0	0	0	0	0	0	0
Srrm4	0	0	-1.04427	-0.611577	0	0	0	0	0	0	0	0	0	0	0	0.831466	-0.654691	0	0	0
Nfam1	0	0	0	-0.713299	0	0	0	0	0	0	0	0	0	0	0	0	0	0	0	0
Necap2	0	0	0	-0.667961	0	0	0	0	0	0	0	0	0	0	0	0	0	0	0	0
Pck1	0	0	-0.624229	0	0	0	0	0	0	0	0	0	0	0	0	1.02512	-0.707896	0	0	0
Inpp5b	0	0	0	0	0	0	0	0	0	0	0	0	0	0	0	0.706487	0	0	0	0
Nemp1	0	0	0	0	0	0	0	0	0	0	0.718908	0	0	0	0	0	0	0	0	0
Kdm4b	0	-0.760318	0	0	0	0	0	0	0	0	0	0	0	0	0	0	0	0	0	0
Tle3	0	0	0	0	0	0	0	0	0	0	0	-0.628677	0	0	0	0	0	0	0	0.623107
Cyyr1	0	0	0	-0.620605	0	0	0	0	0	0	0	0	0	0	0	0	0	0	0	0
Rab11fip4	0	-0.756886	0	-0.852992	0	0	0	0	0	0	0	0	0	0	0	0	0	0	0	0
Lbh	0	-0.688194	0	-0.96272	0	0	0	0	0	0	0	0	0	0	0	-0.62345	0	0	0	0
Nat8	0	0	0	6.25231	0	0	0	0	0	0	0	0	0	0	0	0	0	0	0	0
Zfp334	0	-1.19479	0	-1.45986	0	0	0	0	0	0	0	0	0	0	0	0	0	0	0	0
Slc17a3	0	0	0	0	0	0	0	0	0	0	-0.593374	0	0	0	0	0	0	0	0	0
Chst7	0	0	0	-0.660729	0	0	0	0	0	0	0	0	0	0	0	-0.935036	0	0	0	0
Fdps	0	0	-0.737084	0	0	0	0.690837	0.680097	0	0.7197	0	0	0	0	0	-0.996562	0	0	0	0
Ccdc77	0	-1.06133	0	-0.849321	0	0	0	0	0	0	0	0	0	0	0	0	0	0	0	0
Rnf186	0	1.01729	0	0.697081	0	0	0	0	0	0	0	0	0	0	0	-1.13314	0.853393	0	0	0
Ezh2	0	-1.43195	0	-1.38288	0	0	0	0	0	0	0.872876	0	0	0	0	0	0	0	0	0
Efr3b	0	0	0	0	0	0	0	0	0	0	0	0	0	0	0	0	0	0	0	0.692618
Degs2	0	0	0	0	0	0	0	0	0	0	0	0	0	0	0	0	0	0	2.75165	0
Gpnmb	0	0	0	0	0	0	0	0	0	0	4.43125	0	0	0	0	0	0	0	0	0
Igsf8	0	0	0	-0.637136	0	0	0	-0.597368	0	0	0	-0.613006	0	0	0	-0.835801	0	0	0	0.622556
G6pc	0	0	0	0	0	0	-0.76736	1.10373	0	-0.631591	-0.779046	1.17805	0	0	0	0	0	0	0	0
Maff	0	0	0	0	0	0	0	0	0.586958	0	0	-0.627034	0	0	0	0	0	0	0	0
Epb41l3	0	0	0	-0.764141	0	0	0	0	0	0	0	0	0	0	0	0	0	0	0	0
Gck	0	0	0	0	0	0	0.894306	0	0	0.625531	-0.736814	0	0	0	0	0	0	0	0	0
Cnmd	0	3.12523	0	2.86096	0	0	0	0	0	0	-1.22015	-1.10991	0	0	0	0	0.752538	0	0	0
Smyd1	0	1.53432	0	1.477	0	0	0	0.604013	0	0	-0.850675	0	0	0	0	0	-0.593528	0	0	0
Wipf2	0	0	-0.629421	0	0	0	0	0	0	0	0	0	0	0	0	0	0	0	0	0
Tspan13	0	-0.590952	0	-0.918809	0	0	0	0	0	0	0	0	0	0	0	0	0	0	0	0
Fgg	0	0	0	0	0	0	0	0	0	0	0	0	-0.851475	0	0	0	0	0	-0.985065	0
Gas2l3	0	-1.27272	0	-1.35716	0	0	0	0	0	0	1.20842	-0.592404	0	0	0	0	0	0	0	0
Ankrd37	0	-1.21759	0	-2.11344	0	0	0	0	0	0	0	0	0	0	0	-0.618385	0.926292	0	0	0
Acot3	0	2.30088	0	0	0	0	0	0.686951	0	0	0	0	0	0	0	3.05108	0	-0.639765	2.0976	1.32176
Tmem200b	0	-0.781297	0	-1.17369	0	0	0	0	0.711995	0	0	0	0	0	0	0	0	0	0	0
Tsga10	0	0.752756	0	0	0	0	0	0	0	0	0	0	0	0	0	0	0	0	0	0
Zcwpw1	0	0	0	-0.900653	0	0	0	0	0	0	0	0	0	0	0	0	0	0	0	0
Zfp445	0	0	0	1.07082	0	0	0	0	0	0	0	0	0	0	0	0	0	0	0	0
Myl1	0	0	0	0	0	0	0	4.18864	0	0	0	0	0	0	0	-19.324	0	0	0	0
Lrrfip2	0	0	0	0	0	0	0	0	0	0	0	0	0	0	0	0.628562	0	0	0	0
Inpp4b	0	0	0	-0.949052	0	0	0	0	0	0	0	0	0	0	0	0	0	0	0	0
Glyat	0	0	0	0.83309	0	0	0	0	0	0	0	0	0	0	0	0	0	0	0	0
Fbxl15	0	0	0	0	0	-0.898208	0	0	0	0	0	0	0	0	0	0	0	0	0	0
Rab30	0	0.792893	0	0	0	0	0	1.01167	0	0	0	0.781234	0	0	0	2.7311	0	0	0	0
Cpeb2	0	0	0	0.923891	0	0	0	0	0	0	0	0	0	0	0	0.712569	-0.867732	0	0	0
Pik3ap1	0	0	0	0	0	0	0	0	0	0	0	0	0	0	0	0.812238	-0.744174	0	0	0
Apobec3	0	0	0	-0.719917	0	0	0	0	0	0	1.08768	0	0	0	0	0	0	0	0	0
Crispld2	0	0	0	0	0	0	0	0	0	0	1.65809	0	0.930209	0	0	0	0	0	0	0
Flvcr2	0	-0.980555	0	-2.07524	0	0	0	-0.676674	0	0	0.96782	-0.588338	0.768979	0	0	0.907119	0	0	0	0
Ptpn13	0	-0.927236	0	-0.974832	0	0	0	0	0	0	0.98856	0	0	0	0	0	0	0	0	0
Hint2	0	0.666556	0	0	0	0	0	0	0	0	0	0	0	0	0	0	0	0	0	0
Pole	0	-2.03442	0	-1.8719	0	0	0	0	0	0	1.26724	-0.64253	0	0	0	0	0	0	0	0
Adamtsl1	0	0	0	0	0	0	0	0	0	0	0.927779	0	0	0	0	0	0	0	0	0
Ciita	0	0	0	0	0	0	0	0	0	0	1.0696	0	0	0	0	0	0	0	0	0
Tmprss2	0	0	0	-0.781205	0	0	0	0	0	0	0.696348	0	0	0	0	0.620536	-0.653882	0	0	0
Trim68	0	-0.631425	0	-1.0133	0	0	0	0	0	0	0	0	0	0	0	-0.611241	-0.798681	0	0	0
Zfp697	0	-0.910655	0	-0.634303	0	0	0	0	0	0	0	0	0	0	0	0	0	0	0	0
Plekhg5	0	0	0	0	0	0	0	0	0	0	0	-0.987411	0	0	0	0	0	0	0	0.666393
Irgm1	0	0	-0.604591	0	0	0	0	0	0	0	0	0	0	0	0	0	0	0	0	0
Lysmd3	0	0	0	0	0	0	0	0.704608	0	0	0	0	0	0	0	0	0	0	0	0
Tmem134	0	0	0	0	0	0	0	0	0	0	0	0	0	0	0	0	0.613402	0	0	0
Themis2	0	0	0	0	0	0	0	0	0	0	0	0	0	0	0	0	-0.81374	0	0	0
Miip	0	0	0	0	0	0	0	0	0	0	0.656857	0	0	0	0	0	0	0	0	0
Scube1	0	0	0	0	0	0	0	0	0	0	2.51002	0	0	0	0	0	0	0	0	0
Slc33a1	0	0	0.817823	0	0	0	0	0	0	-0.731532	0	0	0	0	0	0	0	0	0	0
Rgs4	0	-1.71246	-0.598835	-2.06834	0	0	0	0	0	0	0	0	0	0	0	0	0	0	0	0
C1qtnf6	0	-2.91979	0	-3.11009	0	0	0	0	0	0	0	0	0	0	0	0	0	0	0	0
Zfp518a	0	0	0	0	0	0	0	0.920933	0	-0.859657	0	0	0	0	0	0	0	0	0	-0.648423
Atp2b2	0	0	0	0	0	0	0	0	0	0.932357	0	0	-0.83598	0	0	0	0	0	0	-0.66393
0610031O16Rik	0	0	0.642596	0	0	0	0	0	0	0	0	0	0	0	0	0	0	0	0	0
Moxd1	0	0	-1.49639	10.9795	0	0	0	0	0	0	0	0	-5.40894	1.58374	0	-3.36702	-1.98014	-2.58524	-0.717322	0
Cxcl16	0	0	0	0	0	0	0	0	0	0	0.794455	0	0	0	0	-0.860708	0	0	0	0
Cdh2	0	0	0.865584	0	0	0	0	0	0	0	0	0	0	0	0	0.58735	0	0	0	0
Flt3	0	0	0	0	0	0	0	0	0	0	1.16044	0	0	0	0	0	0	0	0	0
Ncapg2	0	-2.15737	0	-2.41789	0	0	0	0	0.620648	0	1.66429	0	0	0	0	-0.833793	0	0	0	0
Ska1	0	-4.44666	0	-4.62763	0	0	0	0	0	0	0	0	0	0	0	0	0	0	0	0
Gatm	0	-0.98206	0	-1.41706	0	0	0	0	0	0	0	0	0	0	0	-0.718008	0	0	0	0
Cryl1	0	0.668571	0	0.613139	0	0	0	0	0	0	0	0	0	0	0	0	0	0	0	0
Ppard	0	-0.800156	0	-0.773605	0	0	0	0	0	0	0	0	0	0	0	0	-0.94198	0	0	0
Abcc10	0	0	0	0	0	0	0	0.589924	0	0	0	0	0	0	0	0	0	0	0	0
Ppp1r10	0	0	0	0	0	0	0	0	0	0	0	1.01015	0	0	0.822191	0	0	0	0	0
Nfkb2	0	0	0	0	0	0	0	0	0	0	0.60153	0	0	0	0	0	0	0	0	0
Rarres1	0	0.602104	0	1.68877	0	0	0	0.651087	0	0	-0.743201	0	-0.679234	0	0	0.818127	0	0	0	0
Fam83b	0	0	0	0	0	0	0	0	0	0	0	0	0	0	0	0	0	0	1.96916	0
Ccdc149	0	-1.11687	0	0	0	0	0	0	0	0	0	0	0	0	0	0	0	0	0	-0.7737
Ctps	0	-0.717747	0	0	0	0	0	0	0	0	0	0	0	0	0	0	0	0	0	0
Ephx2	0	0.628681	0	1.18204	0	0	0	0	0	0	0	0	0	0	0	0	0	0	0	0
Hmgcl	0	0	0.590055	0	0	0	0	0	0	0	0	0	0	0	0	0	0	0	0	0
Fam107a	0	0	0	0	0	0	0	0	0	0	0	0	0	0	0	2.40317	0	0	0	0
Cysltr1	0	0	0	-0.698075	0	0	0	0.634744	0	0	0	0	0	0	0	-0.775858	0	0	0	0
Nr1h5	0	0	0	-0.879917	0	0	0	0	0	0	0	0	0	0	0	-0.665717	0	0	0	0
Mex3b	0	-0.717199	0	0	0	0	0	0	0	0	0	0	0	0	0	0	0	0	0	0
Sult1e1	0	-1.0986	0	-1.38028	0	0	0	3.75006	0	0	0	0	0	2.99272	0	-0.722568	0	0	0	0
Tnfaip8l2	0	0	0	-0.755048	0	0	0	0	0	0	0	0	0	0	0	-0.870382	0	0	0	0
H2-DMa	0	0	0	0	0	0	0	-0.594085	0	0	0	0	0	0	0	-0.906172	0	0	0	0
Myh4	0	0	0	0	0	0	0	7.74033	0	0	0	0	0	0	0	-20	0	0	0	0
Klf2	0	0	0	-0.808344	0	0	0	0	0	0	0	0	0	0	0	0	0	0	0	0
Ttbk1	0	0	0	1.61975	0	-1.00694	0	0	0	0	0	0	0	0	0	0.706823	0	0	0	0
Pla2g7	0	0	0	0	0	0	0	0	0	0	0.79669	0.586235	0	0	0	0	-0.975452	0	0	0.613663
Psen2	0	0.730109	0	0.816368	0	0	0	0	0	0	0	0	0	0	0	0	0	0	0	0
Snx20	0	0	0	-0.928437	0	0	0	0	0	0	0	0	0	0	0	0	0	0	0	0
Rad51	0	-2.95168	0	-3.2291	0	0	0	0	0	0	0	0	1.14335	0	0	0	0	0	0	0
Lhx2	0	0	0	-0.73144	0	0	0	0	0	0	0	0	0	0	0	0	0	0	0	0
Ldah	0	0	0	0.695152	0	0	0	0	0	0	0	0	0	0	0	0	0	0	0	0
Slc22a30	0	2.14072	0	2.15525	0	0	0	0	0	0	-0.879824	0	0	0	0	0	0	0	0	0
Gm38070	0	0	-0.928647	0	0	0	0	0	0	0	0	0	0	0	0	0	0	0	0	0
Sparc	0	-2.91112	0	-3.171	0	0	0	0	0	0	0.990277	0	0	0	0	0	0	0	0	0
Adgra3	0	0	0	0.619877	0	0	0	0	0	0	0	0	0	0	0	0	0	0	0	0
Clcn2	0	0.704014	0	0.842553	0	0	0	0	0	0	0	0	0	0	0	0	0	0	0	0
Manf	0	0	0	0	0	0	0	1.00972	-0.605103	0	0	0.714311	-0.655474	0	0	0	0	0	0	-1.15281
Lypla1	0	0	0.666535	0	0	0	0	0	0	0	0	0	0	0	0	0	0	0	0	0
Dbf4	0	-1.78023	0	-1.56314	0	0	0	-0.774546	0	0	1.12536	0	0	0	0	0	0	0	0	0
Actg1	0	-0.834612	0	-0.872057	0	0	0	0	0	0	0.708729	0	0	0	0	0	0	0	0	0
Pwwp2b	0	0	0	0	0	0	0	0	0	0	0	0	0	0	0	-0.919567	0	0	0	0
Csf2ra	0	0	0	0	0	0	0	0	0	0	0	0	0	0	0	-0.658478	0	0	0	0
Lamc1	0	-1.56049	0	-1.59491	0	0	0	0	0	0	0	0	0	0	0	0	0	0	0	0
Ust	0	0	0	-0.728961	0	0	0	0	0	0	0	0	0	0	0	0	0	0	0	0
Il17rb	0	0	0	0	0	0	0	0	0	0	0.644745	0	0	0	0	-0.637574	0	0	0	0
AI429214	0	0	0	0	0	0	0	0.651781	0	0	0	0	0	0	0	0	0	0	0	0
Rap2b	0	0	0	-0.850161	0	0	0	0	0	0	0	0	0	0	0	-0.765022	0	0	0	0
Sae1	0	-0.585456	0	-0.641072	0	0	0	0	0	0	0	0	0	0	0	0	0	0	0	0
Bag3	0	0.61636	0	0.968012	0	0	0	0	0	0	0	0	0	0	0	0	0	0	0	0
Klhdc8a	0	-0.886519	0	-0.630522	0	0	0	1.18797	-0.608319	0	0	1.04309	0	0	0	0	0	0	0	0
Ces1d	0	0	0.701686	0	0	0	0	0	0	0	0	0	0	0	0	0	0.587451	-0.751739	0	0
Acy1	0	0	0	0	0	-0.663196	0	0	0	0	0	0	0	0	0	0	0	0	0	0
Dcun1d4	0	0	0	0.632942	0	0	0	0	0	0	0	0	0	0	0	0	0	0	0	0
Gm4756	0	6.2399	0	6.72987	0	0	0	0	0	0	-0.951921	0	0	0	0	0	0	0	0	0
Slc35d1	0	0	-0.65912	0	0	0	0	0	0	0	0	0	0	0	0	0	0	0	0	0
Src	0	-1.31728	0	-1.43954	0	0	0	0	0	0	0	0	0	0	0	-0.590415	0	0	0	0
S1pr5	0	2.12125	0	2.28346	0	0	0	0	0	0	0	-0.655749	0	0	0	0	0	0	0	0
Lpar6	0	0	0	0	0	0	0	0.745684	0	0	0	0	0	0	0	0	0	0	0	0
Grpel2	0	0	0	0	0	0	0	0	0	0	0	0	0	0	0	0.590224	0	0	0	0
Gbp2b	0	1.38318	0	0.776009	0	0	0	0	0.587151	0	0	0	0	0	0	-0.85207	0	0	0	0
Cdca7l	0	-2.55258	0	-3.35173	0	0	0	0	0	0	2.31165	0	0	0	0	0	0	0	0	0
Trpm6	0	-2.58067	0	-3.2884	0	0	0	0	0	0	0	0	0	0	0	0	0	0	0	0
Id3	0	0.791983	0	0	0	0	0	0	-0.773489	0	0	0	0	0	0	0	0	0	-1.08886	0
Tmem38a	0	0	0	0	0	0	0	0.64284	0	0	0	0	0	0	0	-1.00154	0	-1.08928	0	0
Krt8	0	0	0	0	0	0	0	0	0	0	0.71227	0	0	0	0	0	0	0	0	0
Usp40	0	0	0	0	0	0	0	0	0	0	0	0	0	0	0	0.639315	0	0	0	0
Stab2	0	-0.778301	0	-1.14682	0	0	0	0	0	0	0	0	0	0	0	0	0	0	0	0
Fbxo36	0	0.64515	0	0.641457	0	0	0	0	0	0	0	0	0	0	0	0	0	0	0	0
Rnf152	0	0	0	0	0	0	0	0.600074	0	0	0	-0.622124	0	0	0	0	0	0	0	0
Zfp820	0	0	0	0	0	0	0	1.09091	0	0	0	0	0	0	0	-0.682801	0	0	0	0
Col6a5	0	0	0	0	0	0	0	0	0	0	1.82352	0	0	0	0	0	0	0	0	0
Extl1	0	1.10799	0	1.74293	0	-0.849966	0	1.21647	0	0	0	0	0	0.761993	0	0	0	0	0	0.601761
Cbarp	0	0	-0.905337	0	0	0	0	0	0	0	0	0	0	0	0	0	0	0	0	0
Sh3bp1	0	-0.69709	0	0	0	0	0	0	0	0	0	0	0	0	0	0	0	0	0	0
Tmem120a	0	0.641522	0	0.880974	0	0	0	0	0	0	0	0	0	0	0	0	0	0	0	0
Chsy1	0	-0.800636	0	-0.990969	0	0	0	0	0	0	0	0	0	0	0	0	0	0	0	0
Habp4	0	0	0	0.677818	0	0	0	0	0	0	0	0	0	0	0	0	0	0	0	0
Tmem263	0	0	0	0	0	0	0	0.599387	0	0	0	0	0	0	0	0	0	0	0	0
Bmper	0	0.861123	-0.793564	0	0	0	0	0.713303	0	0	0	0	0.992123	0	0	0	0	0	0	0
Limch1	0	-0.807189	0	-1.00153	0	0	0	0	0	0	0	0	0	0	0	0	0	0	0	0
Aurkaip1	0	0	0	0	0	0	0	0	0	0	0	0	0	0	0	-0.656334	0	0	0	0
Mndal	0	0	0	-0.794012	0	0	0	0	0	0	0	0	0	0	0	0	0	0	0	0
Osbp2	0	0	0	0	0	0	0	0	0	0	1.83337	-0.949732	0	0	0	0	0	0	0	0
Depdc7	0	0	0	0	0	0	0	0	0	0	0	0	0	0	0	-0.772341	0	0	0	0
Esco2	0	-4.15099	0	-2.8016	0	0	0	0	0	0	2.82339	0	0	0	0	-0.614673	0	0	0	0
Sult2a6	0	-4.67636	0	0	0	0	0	0	0	0	0	0	0	0	0	0	0	0	0	0
Pdp2	0	0	0	0	0	0	0	0	0	0	0	0	0	0	0	0.86999	0	0	0	0
Zfp873	0	0	0	0	0	0	0	0.701029	0	0	0	0	0	0	0	0	0	0	0	0
Cox17	0	0	0	0	0.862465	0	0	0	0	0	0	0	0	0	0	-0.846228	0	0	0	0
Pheta1	0	0	0	0	0	0	0	0	0	0	0	0	0	0	0	-0.725047	0	0	0	0
Adamts7	0	-2.02159	0	-2.10682	0	0	0	-0.590369	0.833183	0	0.817032	-0.847766	0	0	0	-0.887564	0	0	1.20884	0
Arhgap30	0	0	0	-0.695332	0	0	0	0	0	0	0	0	0	0	0	0	0	0	0	0
Pced1b	0	0	0	0	0	0	0	0	0	0	0	0	0	0	0	0	0	0	0	0.999919
Ripply3	0	0	0	-0.954321	0	0	0	0	0	0	0	0	0	0	0	0	0	0	0	0
Neu2	0	0.681531	0	0.655708	0	0	0	0	0	0	0	0	0	0	0	0	0	0	0	0
Ppat	0	0	0	0	0	0	0	0	0	0	0	0	0	0	0	0	0	0	0.660279	0
Ldb1	0	0	-0.647252	0	0	0	0	0	0	0	0	0	0	0	0	0	0	0	0	0
Acad12	0	0.656262	0	0	0	0	0	0	0	0	0	0	0	0	0	0	0	0	0	0
Esam	0	0	0	-0.844653	0	-0.654324	0	0	0	0	0	0	0	0	0	0	0	0	0	0
Ccdc8	0	-1.54865	0	-1.70118	0	0	0	0	0	0	0	0	0	0	0	0	0	0	0	0
Pklr	0	0	0	0	0	0	0	0	0	0	0	0	-0.755178	0	0	0	0	0	0	0
Sec23b	0	0	0	0	0	0	0	0	0	0	0	0	0	0	0	0	0	0	0	-0.599257
Sds	0	0	0	0	0	0	0	0	0	0	0	0	0	0	0.784726	-0.727149	0	0.828447	0	0
Cpeb1	0	1.55691	0	1.40812	0	0	0	0	0	0	0	-0.760739	0	0	0	0	0	0	0	0
Slc1a4	0	-1.99057	0	-2.02384	0	0	0	0	0	0	1.58285	0	0	0	0	0	0	0	0	0
Vtcn1	0	0	0	0	0	0	0	0	0	0	0	0.754803	0	0	0	0	0	0	0	0
5330417C22Rik	0	-1.42602	0	-1.81036	0	0	0	0	0	0	1.26397	0	0	0	0	0	0	0	1.20447	0
Frs3	0	0	0	0	0	0	0	0.774784	0	0	0	0	0	0	0	-0.585706	0	0	0	0
Gimap6	0	0	0	-0.735588	0	0	0	0	0	0	0	0	0	0	0	-0.594709	0	0	0	0
Snx12	0	0	0	-0.793074	0	0	0	0	0	0	0	0	0	0	0	0	0	0	0	0
Zfp759	0	0	0	0	0	0	0	0.748878	0	0	0	0	0	0	0	0	0	0	0	0
Ajuba	0	0	0	0	0	0	0	0	0	0	0	0	0.753876	0	0	0	0	0	0	0
Ak1	0	0	0	0	0	0	0	3.01187	0	0	0	0	0	0	0	0	0	0	0	0
Serpinh1	0	-1.58753	0	-1.47413	0	0	0	0	0	0	0.7697	0	0.617504	0	0	-0.749498	0	0.602672	0	-0.927083
Vangl1	0	0	-0.633413	0	0	0	0	0	0	0	0	0	0	0	0	0	0	0	0	0
Mark1	0	-0.728682	0	-0.979919	0	0	0	0	0	0	0	0	0	0	0	0	0	0	0	0
Aldh3b1	0	0	0	0	0	0	0	0	0	0	0	0	0	0	0	-0.859335	0	0	0	0
Azgp1	0	0	0	0.617168	0	0	0	0	0	0	0	0	0	0	0	0	0	0	0	0
Gstm3	0	-1.06079	-0.711726	-0.605307	0	0.968808	0	-0.765043	0.733705	0.641581	1.91587	0	1.37394	0	0	0	0	1.04381	0	0
Cyp2c70	0	0	0	-0.721573	0	0	0	0	0	0	0	0	-0.690139	0	0	0	0	0	0	0
Wdr73	0	0	0	0	0	0	0	0.784231	0	0	0	0	0	0	0	0	0	0	0	0
Prpf38a	0	-0.592148	0	0	0	0	0	0	0	0	0	0	0	0	0	0	0	0	0	0
Spint1	0	0	0	0	0	0	0	0	0	0	1.62443	0	0	0	0	0	0	0	2.67124	0
Parp8	0	0	0	-0.609684	0	0	0	0	0	0	1.23454	0	0	0	0	0	0	0	0	0
Bcorl1	0	0	-0.711796	0	0	0	0	0	0	0	0	0	0	0	0	0	0	0	0	0
Tube1	0	-1.02327	0	-0.725853	0	0	0	0	0	0	0	0	0	0	0	0	0	0	0	0
Mgp	0	-1.15177	0	-1.99015	0	0	0	0	0	0	1.27499	0	0	0	0	0	0	0	0	0.895843
Arhgef9	0	-1.09381	0	-1.16083	0	0	0	0	0	0	0	0	0	0	0	0	0.99781	0	0	0
Nup93	0	-1.00546	0	-0.848737	0	0	0	0	0	0	0	0	0	0	0	0	0	0	0	0
Egr1	0	-0.640538	-1.25657	-0.986365	0	0	0	0	0	0	-1.42036	0	0	0	0	1.20157	0.964168	0	-0.952699	-2.18751
Arhgap11a	0	-2.60131	-0.59657	-2.92101	0	0	0	0	0	0	1.66057	0	0	0	0	0	0	0	0	0
Slc26a10	0	0	0	-1.15153	0	0	0	0	0	0	0	0	0	0	0	-0.619819	0	0	0	0
Sox17	0	-0.672361	0	-0.859582	0	0	0	0	0	0	0	0	0	0	0	-0.871596	0	0	0	0
Slc4a1	0	-4.4031	0	-4.04126	0	0	0	0	0	0	0	1.07702	0	0	0	0	0	0	0	0
Ablim1	0	0	0	0	0	0	0	0	0	0	0.635741	0	0	0	0	0	0	0	0	0
Rdh5	0	-0.622252	0	-0.911795	0	0	0	0	0	0	0	0	0	0	0	0	0	0	0	0
Zfp41	0	-0.713782	0	-0.927278	0	0	0	0	0	0	0	0	0	0	0	0	0	0	0	0
Fam122b	0	0	-0.623126	-0.672751	0	0	0	0	0	0	0	0	0	0	0	0	0	0	0	0
Slc30a10	0	0	0	0	0	0	0	0.618675	0	0	-0.894802	0.852898	-0.878541	0	0	0	0	0	-0.940193	0
Mrpl23-ps1	0	0	0.951102	0	0	0	0	0	0	0	0	0	0	0	0	0	0	0	0	0
Itm2c	0	0	0	-0.613832	0	0	0	0	0	0	0	0	0	0	0	0	0	0	0	0
Hyi	0	0	0.725129	0	0	0	0	0	0	0	0	0	0	0	0	0	0	0	0	0
Nudt18	0	0	0	0	0	0	0	0	0	0	0	0	0.754928	0.70223	0	0	0	0	0	0
Pde4b	0	0	0	-0.827953	0	0.633719	0	0	0	0	0	0	0	0	0	-1.72411	0	0	0.676653	0
Ninl	0	-0.695802	0	0	0	0	0	0	0	0	0	0	0	0	0	0	0	0	0	0
Bex4	0	-3.44905	0	-4.16882	0	0	0	0	0	0	0	0	0	0	0	0	0	0	0	0
Nme6	0	0	0	0	0	0	0	0.791629	0	0	0	0	0	0	0	0	0	0	0	-0.596419
Fzd6	0	0	0	-0.696448	0	0	0	0	0	0	0	0	0	0	0	1.09356	0	0	0	0
Obp2a	0	0	0.827264	0	0	0	0	0	0	0	0	0	0	0	0	2.10168	0	0	0	0
Krt7	0	-0.668853	0	0	0	0	0	0	0	0	1.06325	0	0	0	0	0	0.70034	0	0	0
Ndufb7	0	0	0.631073	0	0	0	0	0	0	0	0	0	0	0	0	0	0	0	0	0
Lmo2	0	0	0	0	0	0	-0.890161	0	0	0	0	0	0	0	0	-0.860812	0	0	0	0
Bmi1	0	0	0	0	0	0	0	0	0	-0.696803	0	0	0	0	0	0	0	0	0	0
Kdelr3	0	-2.61636	0	-2.67618	0	0	0	0	0	0	0	0	0	0	0	0	0	0	0	0
Clec1b	0	0	0	0	0	0	-0.595922	0	0	0	0	0	0	0	0	0	0	0	0	0
Galnt6	0	-0.794667	0	-0.985138	0	0	0	0	0	0	0	0	0	0	0	0	0	0	1.30419	0
Pbk	0	-4.28347	0	-3.94114	0	0	0	0	0	0	2.42387	0	0	0	0	0	0	0	0	0
Aatk	0	0	0.598088	2.10895	0	0	0	0	0	0	0	0	0	0	0	1.05463	0	-0.786758	0	0
Lbp	0	0	0	-0.622766	0	0	0	0	0	0	0	0	0	0	0	1.22435	-0.730243	0	-0.642232	0
Larp4	0	0	0	0	0	0	0	0	0	-0.608643	0	0	0	0	0	0	0	0	0	0
Ccdc80	0	-1.90654	0	-2.2237	0	0	0	0	0	0	1.06342	0	0	0	0	0	0	0	0	0
P2rx7	0	0	0	0	0	0	0	0	0	0	0	0	0	0	0	0	-0.804437	0	0	0
Nkd1	0	0	0	0	0	0	0	0	0	0.800263	0	0	0	0	0	0	0	0	0	0.58563
Lsp1	0	0	0	-0.748171	0	0	0	0	0	0	1.1968	0	0	0	0	-0.794275	0	0	0	0
Phospho1	0	0	0	0	0	0	0	0	0	0	0	1.23393	0	0	0	0	0	0	0	0
Trim12a	0	0	0	0	0	0	0	0.645746	0	0	0	0	0	0	0	0	0	0	0	0
Fbxo5	0	-1.29493	0	-1.72739	0	0	0	0	0	0	0	0	0	0	0	0	0	0	0	0
H2-Eb1	0	1.05125	0	0.826405	0	0	0	-0.589198	0	0.731624	1.14411	0	0	0	0	0	0	0	0.605783	0
Kank3	0	0	0	-0.687098	0	0	0	0	0	0	0	0	0	0	0	0	0	0	0	0
Nphp1	0	-0.689594	-0.615247	-0.795072	0	0	0	0	0	0	0	0	0	0	0	0	0	0	0	0
Mvd	0	0	0	0	0	0	1.10277	1.2619	0	1.02023	0	0	-0.789219	0	0	-1.09854	0	0	0	0
Ipcef1	0	-1.63887	0	0	0	0	0	0	0	0	0	0	0	0	0	0	0	0	0	0
Cotl1	0	0	0	-0.830165	0	0	0	0	0	0	0	0	0	0	0	0	0	0	0	0
Gtf2ird1	0	0	0	0	0	0	0.797035	0	0	0	0	0	0	0	0	0	0	0	0	0
Tcta	0	0	0.597727	0	0	0	0	0	0	0	0	0	0	0	0	0	0	0	0	0
Gpx2	0	0	0	0	0	0	0	0	0	0	0	0	0	0	0	0	0	0	3.04227	0
H19	0	0	-0.769684	0	0	0	0	0	0	0	0	0	0	0	0	0	0	0	0	0
Cth	0	0	0	0.970513	0	0	0	0	0	0	0.651847	0	0	0	0	0	0	0	0	0
Vwf	0	-0.876074	0	-0.755305	0	0	0	0	0	0	0	0	0	0	0	0	0	0	0	0
Scai	0	-0.98881	0	-0.754115	0	0	0	0	0	0	0	0	0	0	0	0	0	0	0	0
Lamb2	0	-0.624542	0	-0.790326	0	0	0	0	0	0	0	0	0	0	0	0	0	0	0	0
Fitm2	0	0	0	0	0	0	0	0	0	0	0	0	0	0	0	0.841888	0	0	0	0
Nrbf2	0	0	0	0	0	0	0	0	0	0	0	0.606015	0	0	0	0	0	0	0	0
Traip	0	0	0	-2.75548	0	0	0	0	0	0	0	0	0	0	0	0	0	0	0	0
Phf19	0	0	0	-0.814893	0	0	0	1.154	0	0	0	0	0	0	0	0	0	0	0	0
Clec4f	0	0	0	-0.803446	0	0	0	0	0	0	0	0	0	0	0	-0.607006	-0.635025	0	0	0
Pcdh12	0	-0.631873	0	-0.956522	0	0	0	0	0	0	0	0	0	0	0	-0.836072	0	0	0	0
Adcy4	0	0	0	0	0	0	0	0	0	0	0	0	0	0	0	-0.60628	0	0	0	0
Ces1f	0	3.19896	0	3.31313	0	0	0	0	0	0	0	0	0	0	0	0	0	0	0	0
Gm26461	0	0	0.620847	0	0	0	0	0	0	0	0	0	0	0	0	0	0	0	0	0
Thsd7a	0	-0.614149	0	0	0	0	0	0	0	0	1.09424	0	0	0	0	0	0	0	0	0
Ifi44	0	0	-0.881693	0	0	0	0	0.596106	0	0	0	0	0	0	0	0	0	0	0	0
Eif4g1	0	0	0	0	0	0	0	0	0	0	0	0	0	0	0	0.595791	0	0	0	0
Pla2g15	0	0	0	0	0	-0.595162	0	0	0	0	0	0	0	0	0	0	0	0	0	0.596205
Rarb	0	-0.641829	0	-1.3575	0	0	0	0	0.678136	0	0	0	0	0	0	-0.675559	0	0	0	0
Ngfr	0	-0.791106	0	-1.09443	0	0	0	0	0	0	0	0	0	0	0	-0.697069	0	0	0	0
2610301B20Rik	0	0	0	0	0	0	0	0.625678	0	0	0	0	0	0	0	0	0	0	0	0
Entpd7	0	0	0	0	0	0	0	0.819445	0	0	0	0.596575	0	0	0	0	-0.644281	0	0	0
Kynu	0	0	0	0.716884	0	0	0	0	0	0	0	0	0	0	0	0	0	0	0	0
Acer2	0	0	0	0	0	0	0	0	0	0	0	0	0	0	0	0.786063	0	0	0	0
Fuom	0	0	0	0	0	0	0	0	0	0	0	0	0	0	0	-1.0136	0	0	0	0
Mocos	0	0	0	0.746341	0	0	0	0	0	0	0	0	0	0	0	0	0	0	0	0
Tut4	0	-0.693915	0	-1.05536	0	0	0	0	0	0	0.602457	0	0	0	0	0	0	0	0	0
Gdap2	0	0	0	0	0	0	0	0	0	0	0	0	0	0	0	1.01598	0	0	0	0
Cyp2c38	0	6.23297	0	3.06834	0	0	0	0	0	0	0	0	0	0	0	1.29866	1.33987	0	0.684817	0
Cd22	0	0	0	-0.606186	0	0	0	0	0	0	0	0	0	0	0	0	0	0	0	0
Itpka	0	-0.658476	0	-0.676415	0	0	0	0	0	0	0	-0.65503	0	0	0	-1.13587	0.638106	0	0	0
Kif20b	0	-2.67616	0	-2.89389	0	1.19721	0	0	0	0	1.64536	0	0	0	0	0	0	0	0	0
Tbc1d8	0	0	0	0	0	0	0	-0.703063	0	0	0	0.663061	0	0	0	0	-0.985322	0	0	-0.617665
Chst2	0	-0.701672	0	-0.621811	0	0	0	0	0	0	0	0	0	0	0	-0.984485	0	0	0	0
Fgd4	0	0	0.59478	0	0	0	0	0	0	0	0	0	0	0	0	0	0	0	0	0
Rad54l	0	-3.39435	0	-3.68309	0	0	0	0	0	0	0	0	0	0	0	0	0	0	0	0
Mdh1	0	0	-0.836623	0.660027	0	0	0	0	0	0	0	0	0	0	0	-0.622149	0	0	0	0
Tlr2	0	0	0	0	0	0	0	0	0	0	0	0	0	0	0	-0.658816	-0.877884	0	0	0.773315
Ets1	0	-0.992383	0	-1.2297	0	0	0	0	0	0	0	0	0	0	0	0	0	0	0	0
Rab4b	0	0	0	0	0	0	0	0	1.14263	0	0	0	0	0	0	0	0	0	0	0
Dop1b	0	0	0	0.693872	0	0	0	0	0	0	0.692004	0	0	0	0	0	0	0	0	0
Lhfpl2	0	0	0	-0.600692	0	0	0	0	0	0	0	0	0	0	0	0	0	0	0	0
Mthfd2	0	-1.18973	0	0	0	0	0	0	0	0	0	0	0	0	0	0	0	0	0	0
Enpp6	0	0.833093	0	0.833615	0	0	0	0	0	0	0	0	0	0	0	0	0	0	0	0
Hsdl2	0	0.603748	0	0	0	0	0	0	0	0	0	0	0	0	0	0.72885	0	0	0	0
Ung	0	0	0	0	0	0	0	0	0	0	0	0	0	0	0	0.636217	0	0	0	0
Dnmt3a	0	-0.690041	0	-0.645357	0	0	0	0	0	0	0	0	0	0	0	0	0	0	0	0
Hectd1	0	0	0	0	0	0	0	0	0	0	0	0	0	0	0	0.858812	0	0	0	0
Mup-ps22	0	0	-1.55009	0	0	0	0	0	0	0	0	0	0	0	0	0	0	0	0	0
Phlda1	0	0	-0.966719	0	0	0	-0.704137	0	0	-0.633808	-0.828815	0	0	0	0	0	0	0	0	-1.13255
Pidd1	0	0	0	0	0	0	0	0	0	0	0	0	0	0	0	0	-0.992207	0	0	0
Chst12	0	0	-0.657741	-0.89125	0	0	0	0	0	0	0	0	0	0	0	0	0	0	0	0
Vcam1	0	-0.897724	0	-1.2458	0	0	-0.73626	0	0	0	0.760238	0	0	0	0	0	-0.842323	0	0	0
Uba2	0	-0.631885	0	-0.771376	0	0	0	0	0	0	0	0	0	0	0	0	0	0	0	0
Desi2	0	-0.657587	0	-0.609661	0	0	0	0	0	0	0	0.733978	0	0	0	0	0	0	0	0
Jun	0	0	0	0	0	0	0	0	0	0	0	0.860223	0	0	0	0.962902	0.844798	0	0	-0.741887
App	0	0	0	-0.959662	0	0	0	0	0	0	0	0	0	0	0	0	0	0	0	0
Cuedc1	0	0	0	-0.704537	0	0	0	0.87021	0	0	0	0	0	0	0	-0.692816	0	0	0	0
Tmem86a	0	0	0	0	0	0	0	0	0	0	0.766867	0	0.80803	0.758113	0	-0.830717	0	0	0	0
Ttpa	0	0	0	0	0	0	0	0.594293	0	-0.640192	0	0	0	0	0	0	0	0	0	0
Dynll1	0	-0.665057	0	0	0	0	0	0	0	0	0	0	0	0	0	-0.617699	-0.647344	0	0	0
Spag5	0	-3.71879	0	-2.97521	0	0	0	0	0	0	2.16087	0	0	0	0	0	0	0	0	0
Ugt3a2	0	0.743212	0	0.606976	0	0	0	0	0	0	0	0	0	0	0	0	0	0	0	0
Btk	0	0	0	-1.01076	0	0	0	0	0	0	0	0	0	0	0	0	0	0	0	0
Arhgap4	0	0	0	0	0	0	0	0	0	0	0	0	0	0	0	-1.02283	0	0	0	0
Cables1	0	0	0	-1.30842	0	0	0	0	0	0	0	0	0	0	0	0	0	0	0	0
Comtd1	0	0	0	0.625245	0	0	0	0	0	0	0.908555	0	0	0	0	0	0	0	0	0
Junb	0	0	0	0	0	0	0	0	0	0	0	0	0	0.789823	0	0	0.659484	0	0	0
Dram1	0	0	0	-0.927802	0	0	0	0	0	0	1.07172	0	0	0	0	0	0	0	0	0
Ehhadh	0	0	0	0	1.04756	0.809335	0	0	0	0	0	0	0	0	0	0	0	0	0	0
Enah	0	-1.18362	0	-1.15382	0	0	0	0	0	0	1.46593	0	0	0	0	0	0	0	0	0
Rad51ap1	0	-3.38115	0	-3.79178	0	0	0	0	0	0	0	0	0	0	0	0	0	0	0	0
Mmp14	0	0	0	-1.01956	0	0	0	0	0	0	0	0	0	0	0	0	0	0	0	0
Cyp2r1	0	0	0	0	0	0	0	0	0	0	0	0	0	0	0	-0.700692	0	0	0	0
Klhdc8b	0	-0.66086	0	-0.873178	0	0	0	0.594549	0	0	0.848968	0	0	0	0	-0.626982	0	0	0	0
P3h1	0	-0.605478	0	-0.5937	0	0	0	0	0	0	0	0	0	0	0	0	0	0	0	0
Espn	0	-0.763924	0	-1.70237	0	0	0	0	0	0	1.23486	-0.744911	0	0	0	0	0	0	0	0
Hspa1a	0	0	-1.23722	0	0	0	0	0	0	0	0	0	0	0	0	0	0.639793	0	0	0
Cmklr1	0	0	0	-0.696442	0	0	0	0	0	0	0	0	0	0	0	0	0	0	0	0
Gata2	0	0	0	-0.633261	0	0	0	0	0	0	0	0	0	0	0	0	0	0	0	0
Trim7	0	0	0	0	0	0	0	0.67378	0	0	0	0	0	0	0	0	0	0	0	0
Elmod3	0	0.775188	0	0.823171	0	0	0	0	0	0	0	0	0	0	0	1.01683	0	0	0	0
Jam3	0	0	0	-0.925863	0	0	0	0	0	0	0	0	0	0	0	0	0	0	0	0
Cdca5	0	-3.5199	0	-3.69605	0	0	0	0	0	0	0	0	0	0	0	0	0	0	0	0
Gpx8	0	-0.835789	0	-0.764522	0	0	0	0	0	0	0	0	0	0	0	-1.0041	0	0	0	0
Ppp1r1b	0	0	0	0	0	0	0	0	0	0	0	0	0	0	0	-0.585907	0	0	0	0
Rnaseh2b	0	0	0	-0.588241	0	0	0	0	0	0	0	0	0	0	0	0	0	0	0	0
Fam8a1	0	0	0	0.600275	0	0	0	0	0	0	0	0	0	0	0	0	0	0	0	0
Slc22a23	0	0	0	0	0	0	0	0	0	0	0	0	0	0	0	0.63532	0	0	0	0
Relb	0	0	0	0	0	0	0	0	0	0	0.87508	0	0	0	0	0	0	0	0	0
Hspa12b	0	-0.912337	0	-1.05911	0	0	0	0	0	0	0	0	0	0	0	-0.822472	0	0	0	0
Ugt1a7c	0	0	0	0	0	0	0	0	0	0	0	0	0	0	0	0	0	0	2.66623	0
Reep4	0	-0.904171	0	-0.665528	0	0	0	0	0	0.782499	0	0	0	0	0	0	0	0	0	0
Ccnj	0	-0.657698	0	-0.758646	0	0	0	0	0	0	0	0	0	0	0	0	0	0	0	0
Stard9	0	0	0	-0.929643	0	0	0	0	0	0	0	0	0	0	0	0	0	0	0	0
Sik1	0	0	-0.660138	0	0	0	0	0	0	0	0	0	0	0	0	0	0	0	0	0
Lgmn	0	0	0	-0.762861	0	0	0	0	0	0	0	0	0	0	0	0	0	0	0	0
Kif1a	0	0	0	0	0	0	0	0	0	0	1.832	0	0	0	0	0	0	0	0	0
Itga9	0	-0.627079	0	-1.03729	0	0	0	0	0	0	0	0	0	0	0	0	0	0	0	0
Nfatc1	0	0	-0.600599	0	0	0	0	0	0	0	0	0	0	0	0	0	0	0	0	0
Agpat4	0	0	0	-0.868765	0	0	0	0	0	0	0	0	0	0	0	0	0	0	0	0
Pde1a	0	0	0	0	0	0	0	0	0	0	0	0	0	0	0	0	0	0	0	0.669316
Lama5	0	-1.05069	0	-0.987302	0	0	0	0	0	0	0	0	0	0	0	0	0	0	0	0
Prickle2	0	0	0	-0.672538	0	0	0	0	0	0	0	0	0	0	0	0	0	0	0	0
Zfp692	0	0	0	0	0	0	0	0	0	0	0	0	0	0	0	-0.837448	0	0	0	0
Abhd2	0	0	0	-1.12195	0	0	0	0	0	0	0	0	0	0	0	0	0	0	0	0
Mkrn2os	0	0	0	0	0	0	0	0	0	0	0	0	0	0	0	-0.719132	0	0	0	0
Cdr2	0	-2.00362	0	-1.7055	0	0	0	0	0	0	0	1.06799	0	0	0	0	0	0	0	0
Ugt3a1	0	2.2708	0	2.55485	0	0	0	0	0.696158	0	-0.613017	0	0	0	0	0	0	-0.80478	0	0
Gm14403	0	0.973957	0	1.45806	0	0	0	0	0	0	0	0	0	0	0	-0.795161	0	0	0.885728	0
Arhgap9	0	0	0	-1.20519	0	0	0	0	0	0	0	0	0	0	0	-0.74878	0	0	0	0.668076
Fbn1	0	-2.32885	0	-2.34347	0	0	0	0	0	0	1.41438	0	0.726407	0	0	0	0	0	0	0
Pkp3	0	0	0	0	0	0	0	0	0	0	0	0	0	0	0	0	0	0	1.41978	1.00732
Vstm4	0	-1.36907	0	-2.06126	0	0	0	0	0	0	0	0	0	0	0	0	0	0	0	0
Cdc25b	0	-1.85784	0	-2.07639	0	0	0	0	0	0	1.20467	0	0	0	0	0	0	0	0	0
Saa1	0	0	-2.2642	5.16277	-1.10054	-2.31033	0.738443	1.32713	0	0	0.901172	0	-2.6567	1.81181	1.72707	0.947311	-2.10742	0	-1.01948	0.927131
Mroh2a	0	0	0	-1.12476	0	0	0	0	0	0	0	0	0	0	0	0	0	0	0	0
Fscn1	0	-1.19259	-0.692697	-1.53389	0	0	0	0	0	0	0	0	0	0	0	0	0	0	0	0
Cdc42ep3	0	0	0	-0.83098	0	0	0	0	0	0	0	0	0	0	0	0	0	0	0	0
Pqbp1	0	0	0	0.651549	0	0	0	0	0	0	0	0	0	0	0	0	0	0	0	0
Marveld3	0	0	0	0.752511	0	0	0	0	0	0	1.45016	0	0	0	0	0	-0.966529	0	0	0
Bcl7c	0	0	0.626375	0	0	0	0	0	0	0	0	0	0	0	0	0	0	0	0	0
Cda	0	0	0	0	0	0	0	0.730913	0	0	0	0	0	0	0	1.76604	0	0	0	0
Clip2	0	0	0	0	0	0	0	0	0	0	0	0	0	0	0	-0.886242	0	0	0	0
Srxn1	0	0	0	0	0	0	0	0	0	0	0.693368	0	0	0	0	0	0	0	0	0
Tceal1	0	-0.605727	0	-0.80072	0	0	0	0	0	0	0	0	0	0	0	0	0	0	0	0
Gpr4	0	0	0	-0.623351	0	0	0	0	0	0	0	0	0	0	0	0	0	0	0	0
B3gnt9	0	-0.849864	0	0	0	0	0	0	0	0	1.30726	0	0	0	0	0	0	0	0	0
Tspan9	0	0	0	0	0	0	0	0	0	0	0	0	0	0	0	-0.6304	0	0	0	0
Hddc3	0	0	0	-0.695204	0	0	0	0	0	0	0	0	0	0	0	-0.766279	0	0	0	0
Ccdc28b	0	-0.773814	0	-0.791894	0	0	0	0	0	0	0	0	0	0	0	-0.718497	0	0	0	0
Pdgfrl	0	-0.914993	0	0	0	0	0	0	0	0	0	0	0	0	0	0	0	0	0	0
Avpr1a	0	-0.618779	0	-1.12294	0	0	0	0	0	0	-0.795266	0	-0.681442	0	0	0	0	0	-0.750335	0
Rxrg	0	0	0	0	0	0	0	0.804596	0	0	0	0	0	0	0	0	0	0	0	0
Slc39a14	0	0	0	0	0	0	0	0	0	0	0	0	0	0	0	0.722745	0	0	0	0
Samd10	0	0	-0.667872	0	0	0	0	0	0	0	0	0	0	0	0	0	0	0	0	0
Adgre5	0	0	0	-0.647134	0	0	0	0	0	0	0	0	0	0	0	0	0	0	0	0
Gucy1b1	0	-0.824301	0	-1.0818	0	0	0	0	0	0	0	0	0	0	0	0	0	0	0	0
Fcor	0	0	0.979874	0	0	0	0	0	0	0	0	0	0	0	0	0	0.607691	0	0	0
Cpne2	0	-0.597034	0	-0.706387	0	0	0	0	0	0	0	0	0	0	0	-0.673142	0	0	0	0
Setd7	0	0	-0.688583	0	0	0	0	0	0	0	0	0	0	0	0	0	0	0	0	0
Arhgef17	0	-0.718488	0	-0.79467	0	0	0	0	0	0	0	0	0	0	0	0	0	0	0	0
Upf3b	0	0	0	0	0	0.668236	0	0	0	0	0	0	0	0	0	0	0	0	0	0
Ugt1a1	0	0	0	-1.02786	0	0	0	0	0.64227	0	0	0	0	0	0	0.979708	0	-0.832234	0	0
Nbea	0	-1.04809	0	-0.78151	0	0	0	0	0	0	0	0	0	0	0	0	0	0	0	0
Eno1b	0	0	0	0	0	0	0	0	0	0	0	0	0	1.15137	0	0	0	0	0	0
Mlph	0	0.740399	0	0	0	0	0	0	0	0	0	0	0	0	0	0	0	0	0	0
Slc40a1	0	0	0	-0.656679	0	0	0	0	0	0	0	0	0	0	0	0	0	0	0	0
Ston1	0	-0.9256	0	0	0	0	0	0	0	0	0	0	0	0	0	0	0	0	0	0
Anxa5	0	0	0	0	0	0	0	0	0	0	0.789805	0	0	0	0	0	0	0	0	0
Prg4	0	0	-0.600735	0	0	0	0	0	0	0	0	0	-0.681339	0	0	1.14021	-0.730911	0	0	0.708535
Slx4	0	-0.629515	0	-0.605877	0	0	0	0	0	0	0	0	0	0	0	0	0	0	0	0
Prim2	0	-1.02071	0	-1.11603	0	0	0	0	0	0	0	0	0	0	0	0	0	0	0	0
Cdk1	0	-3.18837	-0.687674	-2.95813	0	0	0	0	0	0	2.14467	0	1.17552	0	0	0	0	0	0	0
Dpp9	0	0	0	0	0	0	0	0	0	0	0	0	0	0	0	0	0	0	-0.620534	0
Myl2	0	0	0	0	0	0	0	3.18017	0	0	0	0	0	0	0	0	0	0	0	0
Lgals3	0	0	0	0	0	0	0	0	0	0	0.77807	0	0	0	0	0	0	0	0	0
Mcm2	0	-1.60099	0	-1.32551	0	0	0	0	0	0	1.14418	0	0	0	0	0	0	0	0	0
Kif22	0	-3.4476	0	-3.20418	0	0	0	0	0	0	2.13678	0	0	0	0	0	0	0	0	0
Trdn	0	0	0	0	0	0	0	3.75594	0	0	0	0	0	0	0	0	0	0	0	0
Svil	0	0	0	0	0	0	0	0	0	0	0	0	0	0	0	-0.974064	0	0	0	0
Ces1g	0	0	0	0	0	0	0	0	0	0	0	0	0	0	0	0.826756	0	0	0	0
Atp2b4	0	0	0	-0.659676	0	0	0	0	0	0	0	0	0	0	0	0	0	0	0	0
Lyve1	0	-1.57417	-0.789657	-1.59279	0	0	-1.07226	0	0	0	0.697223	0	0	0	0	0	-0.736252	0	0	0
Cyp4f16	0	-1.00938	-0.94897	-1.337	0	0	0	0	0	0	0.787735	0	0	0	0	-0.871792	-0.771862	0	0	0
Zfp366	0	0	0	-0.64718	0	0	0	0	0	0	0	0	0	0	0	0	0	0	0	0
Mn1	0	0.685016	0	1.06715	0	0	0	0	0	0	0	0	0	0	0	0	0	0	0	0
Cd200	0	0	0	-0.849652	0	0	0	0	0	0	1.2251	0	0	0	0	0	0	0	0	0
Erlin1	0	0	0	0	0	0	0	0	0	0	0	0	0	0	0	-0.694303	0	0	0	0
Fpgs	0	0	0	0	0	0	0	0.66101	0	0	0	0	0	0	0	0	0	0	-0.73958	0
Nipa1	0	-1.09048	0	-1.47054	0	0	0	0	0	0	0	0	0	0	0	0	-0.628347	0	0	0
Erbb4	0	0	0	0	0	0	0	0	0	0	0	0	0	0	0	0	0.856139	0	1.06228	0
Zfp524	0	0.621483	0	0	0	0	0	0	0	0	0	0	0	0	0	0	0	0	0	0
Fkbp11	0	-1.14064	0	0	0	0	0	0	0	0	1.1078	0	0	0	0	-0.736211	0	0	0	0
Pcbp4	0	0	0	0	0	0	0	0	0	0	0	0	0	0.77638	0	-0.76147	0	0	0	0
Zbtb40	0	0	0	0	0	0	0	0	0	0	-0.676712	0	0	0	0	0	0	0	0	-0.74985
Tek	0	0	0	-0.839118	0	0	0	0	0	0	0	0	0	0	0	0	0	0	0	0
Ada	0	0	0	-0.595271	0	0	0	0	0	0	0	0	0	0	0	0	0	0	3.3448	0
Snhg14	0	0	0.73401	0	0	0	0	0	0	0	0	0	0	0	0	0	0	0	0	0
Tiam1	0	-1.20076	0	0	0	0	0	0	0	0	0	0	0	0	0	0	0	0	0	0
Timp2	0	0	0	-0.608495	0	0	0	0	0	0	0.852445	0	0.619206	0	0	0	0	0	0	0
Pck2	0	-0.958913	0	-1.21329	0	0	0	0	0	0	0.711798	0	0	0	0	0	0	0	0	0
Ces1b	0	0	0	-0.809205	0	0	0	0	0	0	0	0	0	0	0	0	0	0	0	0
Impg2	0	1.71708	0	1.09807	0	0	0	0	0	0	0	-0.844359	0	0	0	0	0	0	0	0
Bud13	0	0	0	0	0	0	0	-0.645195	0	0	0	0	0	0	0	-0.678817	0	0	0	0
Tgfbr2	0	-0.653571	0	0	0	0	0	0	0	0	0.820166	0	0	0	0	0	0	0	0	0
Ssbp2	0	0	0	0	0	0	0	0	0	0	0	0	0	0	0	-0.801091	0	0	0	0
Hat1	0	0	0	0	0	0	0	0	0	0	0	0	0	0	0	-0.687419	0	0	0	0
Gm45902	0	0	0	-0.63925	0	0	0	0	0	0	0	0	0	0	0	0	0	0	0	0
Cep83	0	0	0	0	0	0	0	0	0	0	0	0	0	0	0	-0.592655	0	0	0	0
Me2	0	-0.659313	0	-1.01188	0	0	0	0	0	0	0	0	0	0	0	-0.64923	-0.750312	0	0.948998	0
Mad1l1	0	-0.624302	0	0	0	0	0	0	0	0	0	0	0	0	0	0	0	0	0	0
Hamp2	0	1.38959	-1.32553	-2.51792	0.940171	0.64331	-0.604277	0	0.987474	0	-0.729206	0	0	-0.97417	0	-0.86257	1.12578	0.670998	0	0
Slc30a3	0	-1.59442	0	-2.01712	0	0	0	0	0	0	0	0	0	0	0	0	0	0	0	0
[truncated: 3,942 more rows]

## Sheet: SuppTable1B_Allosome.linked
Supplemental Table 1B: Allosome-linked Differentially Expressed Genes (DEGs) in comparisons of aging (Figure 1) or exposures (Figure 2)
Cutoffs for DEGs are linear fold change exceeding 1.5 and adjusted p-value (FDR) < 0.05
Values are log2 fold change
Gene	Liver_Female_aging_10mo.Aged_over._5mo.Adult	Liver_Female_aging_5mo.Adult_over_3wk.Weanling	Liver_Male_aging_10mo.Aged_over._5mo.Adult	Liver_Male_aging_5mo.Adult_over_3wk.Weanling	Liver_Female_5mo.Adult_BPA.hi.over.VEH	Liver_Female_5mo.Adult_BPA.lo.over.VEH	Liver_Female_5mo.Adult_DEHP.over.VEH	Liver_Female_5mo.Adult_PM2.5_JHU.over.VEH	Liver_Female_5mo.Adult_PM2.5_Chi.over.VEH	Liver_Female_5mo.Adult_Pb.over.VEH	Liver_Female_5mo.Adult_TBT.over.VEH	Liver_Female_5mo.Adult_TCDD.over.VEH	Liver_Male_5mo.Adult_BPA.hi.over.VEH	Liver_Male_5mo.Adult_BPA.lo.over.VEH	Liver_Male_5mo.Adult_DEHP.over.VEH	Liver_Male_5mo.Adult_PM2.5_JHU.over.VEH	Liver_Male_5mo.Adult_PM2.5_Chi.over.VEH	Liver_Male_5mo.Adult_Pb.over.VEH	Liver_Male_5mo.Adult_TBT.over.VEH	Liver_Male_5mo.Adult_TCDD.over.VEH	Allosome
Rbm3	1.31239	-1.40802	0.615905	-1.21819	0	0	0	0	0	0	0.867534	0	0	0.60098	0	0	0	0	0	0	X
Sytl5	1.13013	0	0	0	0	0	0	0	0	0	0	0	0	0	0	0	0	0	0	0	X
Tspan7	0	-0.745177	0	-1.16855	0	0	-0.595674	0	0	0	0	0	0	0	0	0	0	0	0	0	X
Pqbp1	0	0	0	0.651549	0	0	0	0	0	0	0	0	0	0	0	0	0	0	0	0	X
Bcor	0	0	0	-0.624295	0	0	0	0	0	0	0	0	0	0	0	0.592069	0	0	0	0	X
Suv39h1	0	-0.744782	0	-0.789583	0	0	0	0	0	0	0	0	0	0	0	0	0	0	0	0	X
Clcn5	0	0	0	0	0	0	0	-0.590415	0	0	0	0	0	0	0	0	0	0	0	0	X
Usp9x	0	0	0	0	0	0	0	0	0	0	0	0	0	0	0	0.599791	-0.847486	0	0	0	X
Pim2	0	0	-0.62789	0	0	0	0	0	0	0	0	0	0	0	0	0	0	0	0	0	X
Rpgr	0	0	0	0	0	0	0	0.631005	0	0	0	0	0	0	0	0	0	0	0	0	X
Mid1ip1	0	0	0	0	0	0	0	0	0	0	0	-0.622024	0	0	0	-1.18354	0.909271	0	0	0	X
Cybb	0	0	0	0	0	0	0	0	0	0	0	0	0	0	0	0	-0.619261	0	0	0	X
Was	0	0	0	-1.03943	0	0	0	0	0	0	0	0	0	0	0	0	0	0	0	0	X
Plp2	0	-0.619819	0	-0.874355	0	0	0	0	0	0	0	0	0	0	0	0	0	0	0	0	X
Porcn	0	0.805553	0	0	0	0	0	0	0	0	0	0	0	0	0	0	0	0	0	0	X
Ccdc120	0	-1.90366	0	-1.2645	0	0	0	0	0	0	2.00442	0	0	0	0	0	0	0	0	0	X
Shroom4	0	-0.652288	0	-0.933168	0	0	0	0	0	0	0	0	0	0	0	0	0	0	0	0	X
Ccdc22	-0.619373	0	0	0	0	0	0	0	0	0	0	0	0	0	0	0	0	0	0	0	X
Praf2	-0.638407	1.16186	0	0.846954	0	0	0	0	0	0	0	0	0	0	0	0	0	0	0	0	X
