# Supplementary material for: Plasticity of Epigenomic and Transcriptomic Aging Reveals Common Targets for Reprogramming by Environmental Exposures
Source: Research Square preprint supplement (doi:10.21203/rs.3.rs-7368222/v1), 2025-09-19
Supplement: Supplementary file 10 [file cac11348d6efb11e629df5ab.xlsx]

## Sheet: SuppTable9a_GSEA
Supplemental Table 9a: Gene Set Enrichment Analysis (GSEA) for aging and exposure comparisons (Figure 6a, Supplemental Fig6b)
Supplemental Table 9a: Gene Set Enrichment Analysis (GSEA) performed using Aizarani Liver cell types
MSigDB C8 Aizarani Liver genesets (v7.5.1), creating the union of all genes for each cell type ("collapsed")
Values in Columns B–S are Normalized Enrichment Scores (NES)
Figure 6c, Supplemental Figure 6b
GeneSets	M LAAsP 5mo.over.3wk NES	M BPA.hi over Veh NES	M BPA.lo over Veh NES	M DEHP over Veh NES	M Pb over Veh NES	M PM2.5JHU over Veh NES	M PM2.5Chi over Veh NES	M TBT over Veh NES	M TCDD over Veh NES	F LAAsP 5mo.over.3wk NES	F BPA.hi over Veh NES	F BPA.lo over Veh NES	F DEHP over Veh NES	F Pb over Veh NES	F PM2.5JHU over Veh NES	F PM2.5Chi over Veh NES	F TBT over Veh NES	F TCDD over Veh NES	M LAAsP 5mo.over.3wk q-value	M BPA.hi over Veh q-value	M BPA.lo over Veh q-value	M DEHP over Veh q-value	M Pb over Veh q-value	M PM2.5JHU over Veh q-value	M PM2.5Chi over Veh q-value	M TBT over Veh q-value	M TCDD over Veh q-value	F LAAsP 5mo.over.3wk q-value	F BPA.hi over Veh q-value	F BPA.lo over Veh q-value	F DEHP over Veh q-value	F Pb over Veh q-value	F PM2.5JHU over Veh q-value	F PM2.5Chi over Veh q-value	F TBT over Veh q-value	F TCDD over Veh q-value	M LAAsP 5mo.over.3wk core genes	M BPA.hi over Veh core genes	M BPA.lo over Veh core genes	M DEHP over Veh core genes	M Pb over Veh core genes	M PM2.5JHU over Veh core genes	M PM2.5Chi over Veh core genes	M TBT over Veh core genes	M TCDD over Veh core genes	F LAAsP 5mo.over.3wk core genes	F BPA.hi over Veh core genes	F BPA.lo over Veh core genes	F DEHP over Veh core genes
Hepatocytes	3.92584	-3.51586	2.82168	0	0	5.06193	-1.79758	-4.54897	-2.38567	4.95846	1.97534	-2.63045	2.09714	-1.4154	-3.10215	1.94566	-6.1797	-1.26113	0	0	0	0	0	0.0228653	0	0.00145455	0.0500928	0	0.0129641	0.00026	0.00472559	0.227004	0	0.0106787	0	0.244136	5730455P16RIK;A1CF;AADAC;AASS;ABAT;ABCA1;ABCC3;ABLIM3;ACACB;ACAD11;ACADSB;ACSL1;ACSM5;ADGRA3;ADH4;ADI1;AHI1;AK3;ALAS1;ALDH1A7;ALDH1L1;ALDH2;ALDH6A1;ALDH7A1;AMBP;ANGPTL3;ANGPTL4;AOX1;APOA2;APOA5;APOB;APOC1;APOC3;AQP9;AR;ARHGEF26;ASL;ASPG;ATP5J;AZGP1;BAAT;BCL6;BHMT;C2;C4BP;C6;C8A;C8B;C9;CAMK1D;CAT;CCT8;CFHR1;CHDH;CHORDC1;CHRD;CLMN;CLU;CMBL;COBLL1;COL27A1;COLEC12;CPB2;CPN2;CRP;CRYL1;CSAD;CYB5A;CYP27…	0610030E20RIK;4931406C07RIK;5730455P16RIK;A1CF;AASS;ABCA1;ABLIM3;ACACB;ACAD11;ACADSB;ACAT1;ACSL1;ADCY1;ADGRA3;ADH4;ADI1;AFM;AHI1;AIG1;ALAS1;ALB;ALDH1A7;ALDH1L1;ALDH6A1;ALDH8A1;ALDOB;AMBP;ANGPTL3;ANGPTL4;AP1M1;APCS;APOA1;APOA2;APOB;AR;ARHGEF10L;ARHGEF26;ASGR1;ASGR2;ATF5;BAAT;BHMT;BHMT2;BNIP3;C3;C4BP;C5AR2;C6;C8A;C8B;C9;CALD1;CAMK1D;CAT;CCNL2;CCT8;CDO1;CES2G;CFI;CHORDC1;COBLL1;COMMD2;CP;CPB2;CPEB4;…	3110040N11RIK;ABAT;ABCA1;ABCA5;ABHD15;ACADVL;ACSM5;ACY1;AFM;AGT;AGXT;AHSG;AIG1;AK3;AKR1D1;ALDH1L1;ALDH2;ALDH4A1;ALDH7A1;AMBP;APCS;APMAP;APOA1;APOA5;APOB;APOC1;APOC3;APOC4;APOE;APOF;APOH;APOM;AQP9;ARG1;ARHGEF10L;ARL10;ASGR1;ASGR2;ASL;ASPG;ASS1;ATF5;AZGP1;BAAT;BNIP3;C2;C3;C4BP;C6;C8A;C8B;C9;CAPN3;CAR5A;CCDC30;CCNL2;CDO1;CFB;CFI;CHDH;CHRD;CLU;CMBL;COL18A1;COL27A1;COLEC12;CP;CPB2;CPN2;CPS1;CRYL1;CSAD…			4931406C07RIK;5730455P16RIK;A1CF;AASS;ABAT;ABCA1;ABCA5;ABCA6;ABCC2;ABCC3;ABHD15;ACAA2;ACAD11;ACADM;ACADSB;ACADVL;ACAT1;ACER3;ACSL1;ACSM2;ADGRA3;ADH1;ADH4;ADI1;AFM;AGT;AHSG;AK3;AKR1D1;ALAS1;ALB;ALDH1A7;ALDH1L1;ALDH2;ALDH6A1;ALDH7A1;ALDOB;ANGPTL4;AOX1;AP1M1;APMAP;APOA1;APOA2;APOB;APOC1;APOE;APOF;APOH;AQP9;AR;ARHGEF10L;ARHGEF26;ARMC9;ARSK;ASGR2;BAAT;BCHE;BCL6;BDH1;BHMT;BHMT2;BNIP3;C3;C4BP;C6;C8A;C9;…	A1CF;ABLIM3;ACSM2;AHSG;AIG1;AMBP;ANGPTL4;APCS;ARHGEF26;ASS1;BCL6;C2;C3;C5AR2;C6;C8A;C8B;C9;CEP89;CFB;CFI;CHORDC1;CP;CPB2;CPN2;CPS1;CYB561A3;DIS3;DST;ELL2;ERBB3;F5;F9;FBXO31;FGA;FGB;FGG;FGL1;FKBP5;FMN1;FOXO1;FYB2;GABPB2;GADD45G;GLYCTK;GNE;GNL3L;GOT1;GPX3;H6PD;HC;HEATR5A;HP;HPX;HSPA4L;IGFBP1;IL6RA;ITIH1;ITIH2;ITIH3;ITPR2;ITSN1;KLF15;LBP;LEPR;LRG1;MEGF9;METTL2;MIGA1;MKNK2;MLXIP;MT1;MYO1B;NNMT;ORM2;P…	A1BG;AADAC;AASS;ABAT;ABCA1;ABCA5;ACACB;ACAD11;ACADSB;ADCY1;AGXT;AHI1;AHSG;AIG1;ALAS1;ALDH1L1;ALDH2;ALDH7A1;ALDH8A1;ALDOB;AMBP;ANGPTL4;AP1M1;APCS;APOA1;APOA2;APOA5;APOB;APOC1;APOC3;APOE;APOF;APOH;APOM;ARG1;ARHGEF10L;ARL10;ARMC9;ARSK;ASGR1;ASPG;ASS1;ATF5;ATP5J;AZGP1;BHMT;BHMT2;C3;C4BP;C5AR2;C6;C8A;C8B;C9;CALD1;CAMK1D;CAPN3;CDO1;CFHR1;CFI;CHORDC1;CHRD;CLU;CMBL;CP;CPB2;CPEB4;CPN2;CPS1;CRP;CYP27A1;CYP…	0610030E20RIK;4931406C07RIK;5730455P16RIK;A1CF;AADAC;AASS;ABAT;ABCC3;ABLIM3;ACADM;ACADSB;ACAT1;ACSL1;ACSM2;ADCY1;ADGRA3;ADGRG6;AFM;AGXT;AHI1;AKR1D1;ALB;ALDH6A1;ALDH7A1;ALDOB;ANGPTL3;ANGPTL4;AOX1;APOA1;APOH;APOM;ARG1;ARHGEF26;ARMC9;ASL;ASS1;ATF3;ATF5;BAAT;BCDIN3D;BCHE;BHMT;C6;C8A;C8B;C9;CALD1;CAMK1D;CAPN3;CAT;CCNL2;CCT8;CFHR1;CFI;CFL2;CHORDC1;CHRD;COL27A1;CPEB4;CPS1;CRYL1;CSAD;CYP1A2;CYP2D10;CYP4A…	3110040N11RIK;4931406C07RIK;A1BG;A1CF;AASS;ABAT;ABCC2;ABCC3;ABLIM3;ACACB;ACAD11;ACADM;ACADSB;ACADVL;ACSL1;ACSM5;ADGRA3;ADGRG6;ADH4;ADI1;AHI1;AIG1;AK3;ALAS1;ALB;ALDH1A7;ALDH1L1;ALDH2;ALDH4A1;ALDH6A1;ALDH7A1;ALDH8A1;ANGPTL3;ANGPTL4;AOX1;APMAP;APOA2;APOA5;APOB;APOC1;APOC3;APOE;APOH;AQP9;AR;ARHGEF26;ARSK;ASGR1;ASGR2;ASL;ASPG;ATP5J;AZGP1;BAAT;BCHE;BCO2;BNIP3;C2;C3;C6;C9;CAMK1D;CAT;CCT8;CDO1;CFHR1;CHDH…	0610030E20RIK;3110040N11RIK;4931406C07RIK;5730455P16RIK;A1BG;A1CF;AADAC;AASS;ABHD15;ABLIM3;ACAA2;ACAD11;ACADM;ACADSB;ACADVL;ACAT1;ACSL1;ACY1;ADCY1;ADH1;AGXT;AIG1;AK3;ALAS1;ALDH2;ALDH4A1;ALDOB;ANGPTL4;AOX1;APOA2;APOA5;APOC1;APOC3;APOC4;APOE;APOF;APOH;APOM;AQP9;ARG1;ARHGEF10L;ARHGEF26;ARMC9;ASGR1;ASPG;ASS1;ATF5;ATP5J;AZGP1;BAAT;BCDIN3D;BCO2;BDH1;BHMT;BNIP3;C2;CCNL2;CCT8;CFHR1;CHDH;CHORDC1;CHRD;CMBL…	AADAC;AASS;ABAT;ABCA1;ABCA6;ABCC3;ABHD15;ACAA2;ACACB;ACAD11;ACADVL;ACAT1;ACSM5;ACY1;ADGRA3;ADGRG6;ADH4;ADI1;AGT;AHI1;AHSG;AIG1;AK3;AKR1D1;ALAS1;ALDH1L1;ALDH2;ALDH4A1;ALDOB;AMBP;ANGPTL4;AP1M1;APCS;APMAP;APOA1;APOA2;APOA5;APOC1;APOC3;APOC4;APOE;APOF;APOH;APOM;AQP9;ARG1;ARHGEF10L;ARHGEF26;ARL10;ASGR1;ASGR2;ASL;ASPG;ASS1;ATP5J;AZGP1;BAAT;BCL6;BCO2;BDH1;BHMT;BHMT2;BNIP3;C2;C3;C4BP;C5AR2;C6;C8A;C8B;CAP…	0610030E20RIK;4931406C07RIK;5730455P16RIK;A1BG;A1CF;ABAT;ABCA1;ABCA6;ABCC2;ABCC3;ABHD15;ABLIM3;ACAA2;ACACB;ACAD11;ACADM;ACADSB;ACADVL;ACAT1;ACER3;ACSL1;ACSM5;ACY1;ADCY1;ADGRA3;ADH1;ADH4;ADI1;AFM;AGT;AGXT;AHSG;AIG1;AK3;ALAS1;ALB;ALDH1A7;ALDH2;ALDH4A1;ALDH7A1;ALDH8A1;ALDOB;AMBP;ANGPTL3;AOX1;AP1M1;APCS;APMAP;APOA1;APOA2;APOB;APOC1;APOC3;APOC4;APOE;APOF;APOH;APOM;AQP9;AR;ARHGEF10L;ARMC9;ARSK;ASGR1;AS…
EpCAM+ Bile Duct	1.85552	3.23216	1.73151	-1.80258	2.19529	2.70159	-1.41581	3.14625	1.9242	2.34323	-2.65611	1.58977	2.14786	3.74126	-3.09354	2.50246	2.9572	-2.20012	0.0236307	0.0425551	0.0367053	0.031154	0	0.109786	0	0.0091456	0.0493819	0.000333333	0	0.0583095	0.00749663	0	0	0	0	0.00506325	ABCB1B;ABCC3;ABLIM1;ADAM9;AFDN;AI661453;ALDH3A2;AMBP;AMOTL2;APOB;ARRDC2;C77080;CAMK2N1;CLMN;CLU;COBL;COL27A1;CPB2;CRIM1;CYP3A13;DST;DUSP4;EGFR;EMP2;EPHA2;ERBB3;ERRFI1;FAM102A;FGFR3;FLNB;FMO5;GDF15;GSTP2;HNMT;HSP90AA1;HSP90AB1;HSPB1;KIFC3;KRT18;KRT8;LAD1;LAMB3;LAMP2;LCN2;LGALS4;LMNA;LMO7;LRP10;MAGI1;MAL2;MARVELD3;MET;MGLL;MLPH;MSI2;MSMO1;MYL6;MYO6;NCEH1;NECTIN2;NEDD4L;NFIC;ONECUT2;PARD6B;PIGR;PIM3…	ABCC3;ABHD2;ABLIM1;ACTG1;AGT;AHNAK;ALDH3A2;AMOTL2;ANXA11;ANXA2;ANXA3;ANXA4;ANXA5;AQP1;ARRDC2;ATF3;ATP1B1;BAMBI;BICC1;CAMK2N1;CAR2;CD151;CD63;CDC42EP1;CDH1;CDKN1C;CKB;CLDN1;CLDN3;CLIC1;COL27A1;CRIM1;CRYZ;CSF1;DCDC2A;DDR1;DUSP4;EMP2;ENAH;EPB41L1;EPCAM;ERBB3;EZR;FAM102A;FGFR2;FGFR3;FLNA;FMO5;FZD1;GADD45A;GDF15;GLIS3;GOLM1;GPRC5B;GSTP2;HNMT;ITGB5;ITGB8;KIFC3;KLF6;KRT18;KRT19;KRT8;LAMA5;LAMC1;LAMC2;LG…	2310022B05RIK;ABHD2;ABLIM1;ACTG1;AFDN;AGT;AMBP;ANPEP;ANXA11;ARRDC2;ATF4;ATP1A1;C3;C77080;CAMK2N1;CCND1;CD151;CDC42EP1;CDH1;CLDN3;CLIC1;CLU;COBL;COL27A1;CPB2;CPD;CSF1;CTSH;DDR1;DHCR24;EMP2;ENPP2;FAM102A;FGFR2;GADD45A;GDF15;GPRC5B;GSTP2;HABP2;HMGCR;HOMER2;IFNGR2;IRF2BP2;IRS2;ITGB5;ITIH2;ITPKC;KANK2;KRT18;KRT8;LCN2;LGALS3;LMNA;LRP10;MAFF;MARVELD3;MET;MYL6;NECTIN2;NFIB;NFIC;NFKB2;NFKBIA;NQO1;NUAK2;PA…	2310022B05RIK;ABCB1B;ABCC3;ABHD2;ABLIM1;ACTG1;ACTN4;ADAM9;AFDN;AHNAK;AI661453;AKR1B10;ALCAM;ALDH3A2;AMOTL2;ANPEP;ANXA11;ANXA2;ANXA3;ANXA4;ANXA5;APLP2;APOB;AQP1;ARRDC2;BACE2;BAMBI;BCL2L1;BEX3;BICC1;BIRC3;C77080;CALM2;CAMK2N1;CAPN2;CAR2;CCNL1;CD151;CD59A;CDC42EP1;CDH1;CDH2;CGN;CHP1;CLDN1;CLDN3;CLIC1;CLINT1;CLMN;CLU;COBL;COL27A1;CPB2;CPD;CRYAB;CRYZ;CSF1;CTBP2;CTSH;CXADR;CYFIP1;DCDC2A;DHCR24;DSG2;DSP…	ABLIM1;ACTN4;AGT;AMBP;ANXA2;ANXA4;APLP2;ATF3;BCL2L1;BMP2;C3;CCND1;CD63;CKB;CLDN3;CLU;CPM;CRIM1;CTBP2;CYSTM1;DDR1;DYNC1I2;ERRFI1;FGFR2;FLNA;FLNB;GADD45A;GC;GOLM1;GSTP2;HES1;HNMT;HSD17B2;HSP90AA1;HSP90AB1;HSPB1;ITGB5;KLF6;KRT18;KRT19;KRT7;KRT8;LCN2;LGALS3;LMNA;MARVELD3;MCAM;MYL6;NECTIN2;NEDD4L;NEDD9;NFKB2;NQO1;PAWR;PDLIM1;PDZK1IP1;PFKP;PKHD1;PMEPA1;PRDX5;PTPRK;RASSF4;RBPMS;RHBDF1;S100A11;S100A6;SDC…	2310022B05RIK;ABCC3;ABHD2;ACTG1;ACTN4;ADAM9;AFDN;AGT;AI661453;ALDH3A2;AMOTL2;ANPEP;ANXA11;ANXA4;ANXA5;APLP2;APOB;ARRDC2;ATP1A1;BAZ1A;BCL2L1;C3;CDC42EP1;CDH2;CHP1;CLINT1;CLMN;CLU;COBL;CPD;CRIM1;CRYZ;CYFIP1;CYP3A13;DHCR24;DSG2;DST;DSTN;DYNC1I2;EGFR;EGR1;ENPP2;EPHA2;ERBB3;ERRFI1;FAM102A;FLNB;FMO5;FZD1;GALNT4;GC;GDF15;GLUL;GTF2I;HABP2;HES1;HOMER2;HSD17B11;HSD17B2;HSPB1;IFNGR2;INHBA;IRF2BP2;ITIH2;KCNJ…	ABCB1B;ABHD2;ABLIM1;ACTN4;ADAM9;AFDN;ALCAM;AMBP;ANPEP;ANXA11;ANXA3;APOB;ARRDC2;ATP1B1;BACE2;BAZ1A;BCL2L1;BIRC3;C3;CAV2;CCL2;CCND1;CD63;CDH1;CLDN1;CLU;COBL;CPB2;CPD;CPM;CRIM1;CRYAB;CSF1;CTDSPL;CYFIP1;CYP3A13;DSG2;DST;DSTN;EGFR;EMP2;ENPP2;EPB41L1;EPHA2;ERBB3;ERRFI1;EZR;FGFR2;FLNA;FLNB;FMO5;GC;GOLM1;GSTP2;GTF2I;HABP2;HMGCR;HSD17B2;HSP90AA1;HSP90AB1;IRF2BP2;IRS2;ITIH2;KRT18;LAMA5;LAMC1;LCN2;LGALS3;LG…	2310022B05RIK;ABCC3;ABHD2;AHNAK;AKR1B10;ALDH3A2;AMOTL2;ANXA2;ANXA3;ANXA5;ARRDC2;ATF3;ATP1A1;ATP1B1;BACE2;BICC1;C77080;CAMK2N1;CAR2;CD47;CD59A;CD63;CDKN1C;CFTR;CKB;CLDN7;CLIC1;CLMN;COL27A1;CRIM1;CRYAB;CSF1;CTBP2;CTDSPL;CX3CL1;CYSTM1;DCDC2A;DDR1;DSG2;DSP;DSTN;DUSP4;ELF3;EMP2;ENAH;ENPP2;EPB41L1;EPCAM;EZR;FAM102A;FAM110C;FAM171A1;FGFR3;FXYD3;FZD1;GADD45A;GLIS3;GOLM1;GPRC5B;GPX2;GSTP2;GTF2I;HNMT;HOMER…	2310022B05RIK;ACTG1;AFDN;ALDH3A2;AMBP;ANPEP;ANXA11;ANXA2;APOB;AQP1;ARRDC2;ATF4;ATP1A1;ATP1B1;BACE2;BAMBI;BIRC3;BMP2;C3;CAV2;CCND1;CD47;CD63;CDC42EP1;CDH2;CDKN1C;CKB;CLIC1;CLMN;CLU;COBL;CPB2;CPD;CSF1;CTDSPL;CYP3A13;DHCR24;DSP;EPB41L1;FAM102A;FAM171A1;FGFR3;FZD1;GLUL;GOLM1;HMGCR;HMGCS1;HOMER2;IFNGR2;ITGB5;KANK2;KCNJ16;KDM6B;KRT18;KRT8;LAMA5;LAMC1;LCN2;LGALS3;LMO4;LRP10;MAGI1;MCAM;MET;MSMO1;MYH9;MYL…	2310022B05RIK;ABCC3;ADAM9;AFDN;AI661453;ALDH3A2;AMOTL2;ANPEP;APOB;ARRDC2;ATP1A1;BIRC3;BMP2;C77080;CAMK2N1;CCND1;CD47;CD59A;CHP1;CLMN;CLU;CRYZ;CYP3A13;DSG2;EMP2;EPB41L1;ERRFI1;FAM102A;FGFR3;FLNB;FMO5;FOXA2;GADD45A;GC;GDF15;GLUL;HDGF;HNMT;HOMER2;HSD17B11;HSP90AA1;HSPB1;ITGB5;ITGB8;KLF10;KRT18;LAD1;LAMB3;LAMP2;LCN2;LGALS4;LMO7;MAFF;MAGI1;MAOA;MET;MGLL;MLPH;MYL6;NCEH1;NFIB;NFKBIA;ONECUT2;PAH;PIGR;PIM…	2310022B05RIK;ABCB1B;ACTG1;ACTN4;AFDN;AHNAK;AI661453;ANXA2;ANXA5;APOB;AQP1;ATF3;ATP1A1;ATP1B1;BACE2;BAMBI;BAZ1A;BEX3;BICC1;BIRC3;BMP2;C3;C77080;CAMK2N1;CAR2;CAV2;CD47;CDH1;CLMN;COBL;COL27A1;CPD;CPM;CRIM1;CRYAB;CSF1;CTBP2;CTDSPL;CYFIP1;CYP3A13;DHCR24;DSG2;DSP;DST;EGFR;ENPP2;EPB41L1;EPCAM;EZR;FAM102A;FAM171A1;FLNA;FMO5;GADD45A;GLIS3;GLUL;GOLM1;HABP2;HBEGF;HMGCR;HMGCS1;HOMER2;IRS2;ITGB8;KANK2;KCNJ16…	ABHD2;ABLIM1;ADAM9;AI661453;ALCAM;ALDH3A2;ANPEP;ANXA5;APLP2;APOB;ATF3;BAZ1A;BEX3;BICC1;CALM2;CAMK2N1;CAPN2;CCND1;CCNL1;CD59A;CD63;CDH1;CDH2;CDKN1C;CGN;CLDN1;CLINT1;COBL;CPB2;CRYAB;CXADR;DCDC2A;DDR1;DSG2;DSP;DSTN;DUSP4;DYNC1I2;EGFR;EGR1;EMP2;ENAH;EPB41L1;EPCAM;ERRFI1;EZR;FGFR2;FOXA2;GLIS3;GOLM1;HABP2;HDGF;HMGCS1;HSP90AA1;HSP90AB1;INHBA;IRF2BP2;IRS2;ITGB1;ITIH2;KANK2;KDM6B;KIFC3;KLF6;LAD1;LAMC1;LAM…	2310022B05RIK;ABLIM1;ACTN4;AI661453;ALCAM;ANXA11;APOB;ATF3;ATF4;BAZ1A;BCL2L1;C3;C77080;CAPN2;CDH1;CDH2;CGN;CLDN1;CLDN3;CSF1;CXADR;DHCR24;DSG2;DST;DYNC1I2;EGR1;EPHA2;ERBB3;FGFR3;GDF15;GLUL;HABP2;HES1;HMGCR;HMGCS1;HSD17B2;HSP90AA1;HSP90AB1;HSPB1;INHBA;KANK2;KIFC3;KRT18;KRT8;LAD1;LAMC1;LCN2;LLGL2;LMNA;MCAM;MGLL;MSI2;MSMO1;MUC1;MYADM;MYRF;NEDD4L;NFKB2;OCLN;ONECUT2;PARD6B;PDZK1IP1;PKHD1;PKP4;PLXNB2;PR…
B Cells	-1.87339	0	0	1.59597	2.11301	-2.22838	-2.43652	1.64576	0	0	-1.2659	-2.10432	0	0	0	0	2.01269	1.89599	0.0152633	0	0.204316	0.0294818	0.00379297	0.0006725	0.038808	0	0.0238897	0	0.195199	0.00692494	0	0	0	0	0.00540291	0.0155784	AEBP1;ARL10;BACH2;BANK1;BTG2;CD19;CD22;CD37;CD52;CD79A;CD79B;CD83;CLCN6;CORO1A;CXCR4;CYBB;CYFIP2;DGKD;DOK3;EEF1B2;ERLEC1;FAU;FKBP11;H2-OB;IRF8;ISG20;ITM2C;KLF2;LAPTM5;LIMD2;LTB;LY9;LYN;MAP3K8;MS4A1;NCF1;ORAI2;PARP1;PLAC8;PLEKHA2;POU2F2;PRDX4;PRKCB;RCSD1;RNASE6;RPL13A;RPL18;RPLP2;RPS11;RPS5;RPS8;SELL;SLC9A7;SP100;SPIB;SSR4;STX7;SWAP70;SYK;TENT5C;TLR6;UCP2;YBX3			ATP2B1;BICD2;BTG2;CD37;CD52;CLN8;CORO1A;CREB3L2;CRELD2;CXCR4;CYBB;CYFIP2;DDX6;DOK3;EEF1B2;ERLEC1;FAU;FKBP11;FKBP2;FOXP1;H2-AB1;H2-OB;HERPUD1;IL4RA;JCHAIN;KLF2;LUC7L3;LY9;MKNK2;MYDGF;NAP1L1;NCOA3;NUCB2;PARP1;PELI1;PLAC8;PLPP5;POU2F2;PRDX4;RAB30;RALGPS2;RPL13A;RPL18;RPL18A;RPL39;RPLP2;RPS11;RPS23;RPS5;RPS8;SDC1;SEC11C;SP100;SPCS2;SSR4;SYK;TMEM258;TSC22D3;XBP1;YBX3	BTG2;CD52;CD79A;CD79B;CD83;CLN8;CORO1A;CREB3L2;CRELD2;CXXC5;FAU;FKBP11;FKBP2;FOXP1;H2-AB1;ISG20;KLF2;LAPTM5;LUC7L3;LY9;MKNK2;MPEG1;MYDGF;NAP1L1;NCOA3;PDE7A;PELI1;PLAC8;POU2F2;RPL13A;RPL18;RPL18A;RPLP2;RPS11;RPS5;RPS8;SDF2L1;SP100;SPCS2;TENT5C;TMEM258;TSC22D3;XBP1	ARL10;BANK1;CAMK1D;CD52;CD83;CLEC2H;CORO1A;DERL3;DOK3;FKBP11;H2-AB1;IRF8;ISG20;ITM2C;JCHAIN;LIMD2;LY9;MAP3K8;MYDGF;PLAC8;PRDX4;RNASE6;RPL13A;RPL18A;RPL39;RPS23;RPS5;SDF2L1;SEC11C;SELL;SSR4;SYK;TMEM258;XBP1	ARHGEF18;ATF7IP;ATP2B1;BACH2;BICD2;BIRC3;BOD1L;BTG2;CAMK1D;CD52;CLN8;CNTRL;CREB3L2;CRELD2;CYBB;DERL3;EEF2;FKBP11;FOXP1;HERPUD1;HSP90B1;IRF8;ISG20;LAPTM5;LYN;LYST;MAP3K8;MDM4;MKNK2;MPEG1;NCF1;NUCB2;PARP1;PLEKHA2;PLPP5;POU2F2;PRKCB;RCSD1;RIPOR2;RPL13A;SDF2L1;SEL1L3;SP100;SPCS2;STX7;SYK;TENT5C;TSC22D3;UCP2	AEBP1;BACH2;BANK1;CD22;CD37;CD52;CD79B;CD82;CD83;CIITA;CLEC2H;CORO1A;CYBB;CYFIP2;DGKD;FKBP11;H2-AB1;H2-OB;HERPUD1;IRF8;JCHAIN;KLF2;LIMD2;LTB;LY9;MS4A1;NCOA3;ORAI2;PELI1;PLAC8;PLEKHA2;PPM1K;PRKCB;PTK2B;PTPRCAP;RIPOR2;RNASE6;RPL39;SEL1L3;SLAMF7;SP100;SPIB;SWAP70;SYK;TLR6;TTN;UCP2			AEBP1;ATF7IP;ATP2B1;BACH2;BIRC3;BOD1L;CAMK1D;CD22;CD79A;CD79B;CD82;CLCN6;CNTRL;CREB3L2;CXCR4;CYBB;CYFIP2;DDX6;DERL3;DOK3;ERLEC1;FOXP1;IQSEC1;LAPTM5;LUC7L3;LY9;LYN;LYST;MAP3K8;MDM4;NCF1;NCOA3;NUCB2;ORAI2;PDE7A;PELI1;PLEKHA2;POU2F2;PPM1K;PRKCB;RALGPS2;RIPOR2;RPLP2;SDF2L1;SELL;SF1;SLC9A7;SMAP2;SP100;STX7;SWAP70;SYK;UCP2;YBX3	ARL10;CD52;CD82;CLN8;CORO1A;CREB3L2;CYBB;DOK3;EEF2;FAU;FKBP11;HERPUD1;IRF8;ITM2C;JCHAIN;KLF2;LAPTM5;LIMD2;LY9;LYN;MAP3K8;MKNK2;MPEG1;MYDGF;NCF1;ORAI2;PLAC8;PLEKHA2;POU2F2;PRDX4;PRKCB;RIPOR2;RPL18;RPL39;RPLP2;RPS23;RPS5;RPS8;SDC1;SDF2L1;SLC9A7;SYK;UCP2
Stellate cells	-4.68767	4.33486	-3.1154	-2.39255	1.82341	-1.347	-3.16695	4.09181	3.46472	-4.2574	-5.16473	1.58344	-3.32411	3.41234	-1.88915	2.88068	5.35473	0	0	0	0.00392857	0.0405738	0.173679	0	0	0	0.162739	0	0	0.0496683	0	0	0.0205796	0	0	0	ACTA2;ACTN1;ADAMTS1;ADAMTS2;ADGRF5;AEBP1;AGTR1A;ANTXR1;ARHGEF17;C1QTNF1;CAVIN1;CAVIN3;CCBE1;CCDC80;CD63;CDC42EP3;CDKN1A;COL14A1;COL1A1;COL1A2;COL3A1;COL4A1;COL4A2;COL5A1;COL6A1;COL6A2;COL6A3;COLEC11;CPE;CRYAB;CSRP1;CTDSPL;DYNLL1;EDNRB;EGR1;EMP1;ENAH;ENG;EPB41L2;FBLN1;FBLN2;FBLN5;FBN1;FHL1;FILIP1L;FLNA;FOS;FSTL1;FXYD6;GJA4;GM13889;GPC6;IER3;IGFBP3;IGFBP5;IGFBP7;INMT;ITGA1;ITGA8;ITGA9;ITM2C;KAZN;KL…	ACTA2;ADAMTS1;ADAMTS2;ADAMTSL2;AEBP1;ANK3;ANTXR1;ANXA6;ARHGEF17;BGN;BTG2;CAMK2N1;CAVIN1;CCBE1;CCDC80;CD63;CDC42EP3;CEBPB;CEBPD;COL14A1;COL1A1;COL1A2;COL3A1;COL4A1;COL4A2;COL5A1;COL6A1;COL6A2;COL6A3;COLEC11;CRISPLD2;CSRNP1;CSRP1;CXCL12;CYGB;DBNDD2;DDR2;DEPP1;DKK3;DPT;DPYSL2;EDNRB;EMP1;ENAH;FBLN1;FBLN2;FBLN5;FBN1;FHL1;FLNA;FSTL1;GGT5;GM13889;GPC6;GPX3;GSN;ID4;IGFBP4;IGFBP5;IGFBP7;INMT;ITGA8;ITGB5;I…	ACTA2;ADGRF5;AEBP1;ALDH1A7;ANTXR1;ARHGEF17;ARID5B;BGN;BMP2;BMYC;C7;CAV1;CCBE1;CCDC80;CDC42EP3;CDKN1A;COL14A1;CRYAB;CTDSPL;DCN;DDR2;DLC1;DPYSL2;EDNRB;EFEMP1;EGR1;EPAS1;EPB41L2;FBLN5;FHL1;FILIP1L;GGT5;GPC6;HGF;ID3;IGFBP3;IGFBP5;IMPA2;INMT;ITGA1;ITGA8;ITGA9;KLHL23;LAMB1;LAMC3;LGALS1;LHFP;MITF;MYH11;MYL9;NEXN;NRXN1;PALLD;PCM1;PDGFRA;PHLDA1;PRELP;PRKG1;PXDN;RBMS3;RBPMS;RGS5;SEMA5A;SPARC;SPARCL1;SYNPO2…	ACTN1;ADAMTS2;ADGRF5;AEBP1;AGTR1A;ALDH1A7;ANK3;ANTXR1;ANXA6;BMYC;C1QTNF1;CALD1;CAMK2N1;CAV1;CAVIN1;CAVIN3;CCDC3;CCDC80;CCNI;CD81;CDC42EP3;CITED2;CLMN;COL14A1;COL1A1;COL3A1;COL4A1;COL4A2;COL6A1;COL6A2;COL6A3;CPE;CRISPLD2;CRYAB;CSRNP1;CSRP1;CXCL12;DLC1;DSTN;EDNRB;EGR1;EPAS1;EPB41L2;FBLN1;FBLN5;FBN1;FHL1;FIGN;FILIP1L;FSTL1;GEM;GLUL;GSN;HGF;IGFBP5;IGFBP7;ITGA8;ITGA9;ITGB1;ITM2C;JUNB;KANK2;LAMB1;LAMC1…	ACTA2;ACTN4;ADAMTS2;ADAMTSL2;AEBP1;ANK3;ANXA6;ARID5B;ATN1;ATP1B3;BGN;BMP2;BMYC;BTG2;CAMK2N1;CAVIN3;CCBE1;CCDC80;CCNI;CD59A;CD63;CD81;CDKN1A;CEBPD;COL14A1;COL1A1;COL1A2;COL3A1;COL4A1;COL4A2;COL6A1;COL6A2;COLEC11;CRISPLD2;CSRNP1;CSRP1;CYGB;DDR2;DKK3;DPT;DPYSL2;DYNLL1;EMP1;ENG;FBN1;FLNA;FSTL1;GEM;GGT5;GJA4;GM13889;GNAS;GPX3;GSN;HSPB1;IGFBP3;IGFBP4;IGFBP7;INMT;ISYNA1;ITGA1;ITGB1;ITGB5;ITM2C;JUNB;LAMB…	ACTA2;ACTN1;ADAMTS1;ADAMTS2;AEBP1;ANK3;ARHGEF17;ARID5B;BTG2;C7;CAVIN1;CAVIN3;CCDC3;CD63;CDC42EP3;CITED2;COL3A1;COL5A1;COL6A1;COL6A2;COL6A3;COLEC11;CRYAB;CSRP1;CTDSPL;CYGB;DCN;DPT;DPYSL2;DYNLL1;EMP1;EPB41L2;FBLN1;FBLN2;FHL1;FLNA;FSTL1;GGT5;GM13889;GPX3;GSN;ID3;IGFBP3;IGFBP5;INMT;ISYNA1;ITGA8;ITGA9;ITM2C;KANK2;KLHL23;LHFP;LMNA;LTBP4;LUC7L3;LUM;MARCKS;MATN2;MCAM;MEF2D;MFAP4;MKNK2;MXRA7;MYH11;MYL9;NE…	ACTA2;ACTN1;ACTN4;ADAMTS2;ADAMTSL2;ADGRF5;ANTXR1;ARID5B;ATP1B3;BAZ1B;BGN;BTG2;C1QTNF1;CALD1;CCBE1;CCDC3;CCDC80;CCL2;CD63;CDKN1A;COL14A1;COL1A1;COL1A2;COL3A1;COL4A1;COL4A2;COL5A1;COL6A1;COL6A2;COL6A3;COLEC11;CRYAB;CSRP1;CYGB;DDR2;DEPP1;DKK3;DPT;DPYSL2;DST;DSTN;DYNLL1;EMP1;EPAS1;EPB41L2;FBLN5;FBN1;FHL1;FILIP1L;FLNA;FSTL1;GEM;GGT5;GJA4;GPX3;GSN;HGF;IGFBP3;IGFBP7;ISYNA1;ITGA1;ITGA8;ITGA9;LAMB1;LAMC1;…	ACTA2;ACTN1;ADAMTS2;AEBP1;ANK3;ANTXR1;BGN;BMP2;C7;CAMK2N1;CAV1;CAVIN1;CAVIN3;CCBE1;CCDC3;CCDC80;CCNI;CD59A;CD63;CDC42EP3;CITED2;CLMN;COL14A1;COL1A1;COL1A2;COL3A1;COL5A1;COL6A1;COL6A2;COL6A3;COLEC11;CPE;CPXM2;CRYAB;CTDSPL;CXCL12;CYGB;DCN;DDR2;DKK3;DLC1;DPT;DPYSL2;DSTN;EDNRB;EFEMP1;EMP1;ENAH;FBLN1;FBLN2;FBLN5;FBN1;FHL1;FIGN;FILIP1L;FLNA;FOS;FSTL1;FXYD6;GPC6;GPX3;GSN;HGF;IGFBP3;IGFBP5;IGFBP7;IMPA2;I…	ACTN1;ADAMTS1;ADAMTS2;ADGRF5;AGTR1A;ALDH1A7;ANK3;ANTXR1;BGN;BMP2;C1QTNF1;C7;CCBE1;CCDC80;CD63;CEBPB;CEBPD;CLMN;COL1A1;COL1A2;COL5A1;COL6A1;COL6A2;COL6A3;COLEC11;CSRP1;CTDSPL;CXCL12;CYGB;DCN;ENG;EPAS1;FBLN1;FBN1;FIGN;FILIP1L;GEM;GGT5;GJA4;GLUL;GPC6;GPX3;IGFBP3;IGFBP4;IGFBP5;IGFBP7;ISYNA1;ITGA1;ITGA7;ITGA8;ITGA9;ITGB5;KANK2;KLF4;KLHL23;LAMB1;LAMC1;LGALS1;LPP;LRP1;LUM;MASP1;MATN2;MCAM;MFAP4;MGP;MYH1…	ACTA2;ACTN1;ADAMTS1;ADAMTS2;AEBP1;ANK3;ANTXR1;ARHGEF17;BTG2;C1QTNF1;CAV1;CAVIN1;CAVIN3;CCDC80;CD63;CDKN1A;COL14A1;COL1A1;COL1A2;COL3A1;COL4A1;COL4A2;COL5A1;COL6A1;COL6A2;COL6A3;CPE;CSRP1;DYNLL1;EGR1;EMP1;ENAH;EPB41L2;FBLN1;FBLN2;FBLN5;FBN1;FHL1;FLNA;FSTL1;GM13889;GPC6;IGFBP3;ISYNA1;ITGA8;ITGA9;ITM2C;KAZN;KLHL23;LAMB1;LAMC1;LHFP;LUM;MAP1B;MARCKS;MATN2;MCAM;MFAP4;MGP;MMP2;MYADM;MYH10;MYL9;NID1;NOTC…	ACTA2;ACTN1;ACTN4;ADAMTS1;ADAMTS2;ADAMTSL2;ADGRF5;AEBP1;ANK3;ANTXR1;ARHGEF17;BGN;BMP2;C1QTNF1;C7;CAV1;CAVIN1;CCBE1;CCDC3;CCDC80;CDC42EP3;CLMN;COL14A1;COL1A1;COL1A2;COL3A1;COL4A1;COL4A2;COL5A1;COL6A1;COL6A2;COL6A3;CRISPLD2;CRYAB;CTDSPL;CYGB;DDR2;DLC1;DPYSL2;DST;EFEMP1;ENG;EPB41L2;FBLN1;FBLN5;FBN1;FIGN;FILIP1L;FLNA;FSTL1;GLUL;GPC6;GPX3;IGFBP5;ISYNA1;ITGA1;ITGA7;ITGA8;ITGA9;KANK2;KAZN;KLF4;LAMB1;LAM…	ACTA2;ACTN4;ADAMTS1;AGTR1A;ALDH1A7;ANK3;ANTXR1;ARHGEF17;ARID5B;ATN1;BAZ1B;BGN;BTG2;C7;CALD1;CAMK2N1;CCBE1;CCDC3;CCDC80;CCNI;CD59A;CD63;CDC42BPA;CDC42EP3;CITED2;CLMN;COL6A1;COL6A2;COL6A3;COLEC11;CRISPLD2;CRYAB;CYGB;DCN;DDR2;DPT;DPYSL2;DSTN;EDNRB;EFEMP1;EGR1;EMP1;ENAH;EPAS1;EPB41L2;FBLN1;FBLN2;FBLN5;FBN1;FHL1;FIGN;FILIP1L;FSTL1;GEM;GM13889;GPC6;GPX3;ID4;IGFBP3;IGFBP7;IMPA2;ITGA1;ITGA8;ITGB1;KANK2;K…	ADAMTS1;ADAMTS2;ADAMTSL2;ADGRF5;AEBP1;AGTR1A;ANTXR1;ARHGEF17;ARID5B;ATP1B3;BGN;BMP2;BMYC;BTG2;C1QTNF1;CAVIN1;CAVIN3;CCBE1;CCDC3;CCDC80;CCNI;CD63;CDC42EP3;CDKN1A;CEBPB;CEBPD;CITED2;CLMN;COL14A1;COL1A1;COL1A2;COL3A1;COL4A2;COL5A1;COL6A1;COL6A2;COL6A3;COLEC11;CRISPLD2;CSRNP1;CSRP1;CYGB;DCN;DDR2;DKK3;DLC1;DPT;DPYSL2;DSTN;EDNRB;EFEMP1;ENG;EPAS1;EPB41L2;FBLN1;FBLN2;FBLN5;FBN1;FHL1;FILIP1L;FLNA;FSTL1;GE…
NK-NKT cells	-4.72184	1.84807	-2.88206	1.86964	0	-2.77765	-4.01478	3.80038	4.63099	-2.05122	-2.88363	-3.24948	-4.58833	-1.8428	-1.53683	3.44141	3.96369	4.90915	0	0	0.109231	0	0	0	0	0	0.00506134	0.00718178	0	0	0	0.111718	0.0761239	0	0	0	ADGRE5;ADGRG1;AIF1;AKNA;ALOX5AP;ANXA1;AOAH;ARHGAP25;ARHGAP30;ARHGAP45;ARHGAP9;ARHGDIB;ARL4C;ATM;ATP6V1B2;BCL2;BIN2;BTG1;BTG2;CCDC88A;CCND2;CCR5;CD37;CD44;CD48;CD52;CD53;CD83;CDC42SE2;CORO1A;COTL1;CRYBG1;CSF1R;CXCR4;CYBB;CYFIP2;EML4;ETS1;EVI2A;EVL;FCER1G;FCGR3;FGL2;FGR;FLNA;FPR1;FYB;FYN;GADD45B;GBP5;GFOD1;GNG2;GPRIN3;GZMA;GZMB;HCK;HCLS1;HK3;IER3;IER5;IFI205;IGSF6;IKZF1;IL2RB;INPP4B;ISG20;ITGAL;ITG…	ADGRE5;ADGRG1;AIF1;AKNA;ALOX5AP;ANXA1;AOAH;ARHGAP25;ARHGAP30;ARHGAP45;ARHGAP9;ARHGDIB;ARL4C;ARPC5L;ATM;ATP2B1;ATP6V1B2;BCL2;BTG1;BTG2;C3AR1;C5AR1;CBLB;CCDC88A;CCND2;CCR5;CD37;CD44;CD48;CD52;CD53;CD83;CDC42SE2;CEBPB;CLEC2H;CMC1;CORO1A;COTL1;CRYBG1;CSF1R;CTSS;CXCR4;CYBB;CYFIP2;DENND2D;DNAJB1;DUSP4;ETS1;EVI2A;EVL;FCER1G;FGD4;FGL2;FGR;FLNA;FNBP1;FYN;GADD45B;GFOD1;GNG2;GNPTAB;H2-AB1;H2-DMA;HCLS1;IER5;…	ADGRE5;ADGRG1;AIF1;AOAH;ARHGAP25;ARHGDIB;ATP1B3;B2M;BAG3;BCL2;C3AR1;CACYBP;CBLB;CCDC88A;CCND2;CD163;CD44;CD48;CD52;CD53;CD83;CNOT6L;CREM;CXCL13;CYBB;CYFIP2;DNAJA1;DNAJA4;DUSP4;EML4;ETS1;EVI2A;EVL;FCER1G;FCGR3;FCGR4;FGD4;FGR;FLNA;FNBP1;FPR1;FYB;FYN;GBP5;GFOD1;GM36028;GNG2;GNPTAB;H2-DMA;HCK;HCLS1;HOPX;HSP90AA1;HSP90AB1;HSPB1;HSPH1;IFI205;IGSF6;IKZF1;IL2RB;INPP4B;IRAK3;ISG20;ITGAL;ITGB2;KIT;KLRK1;MA…	AIF1;AKNA;ALOX5AP;ARHGAP25;ARHGAP9;ATP1B3;BAG3;C3AR1;CD163;CD37;CD48;CEBPB;CXCR4;CYFIP2;DNAJA4;EVI2A;FCGR3;FGR;FPR1;GNG2;H2-DMA;HCK;HK3;IER3;IGSF6;IL2RB;LNPEP;P2RX7;PDE4D;PIM2;PIP4K2A;POU2F2;PRKCH;PTPN4;RPL13;RPL18;RPL18A;RPL27;RPL39;RPLP1;RPLP2;RPS12;RPS14;RPS15A;RPS17;RPS18;RPS19;RPS20;RPS27A;RPSA;S100A8;SGK1;SLC7A7;TSC22D3		AIF1;ANXA1;AOAH;ARHGAP25;ARHGAP30;ARHGAP45;ARHGAP9;ARL4C;BCL2;BIN2;BTG2;CACYBP;CCDC88A;CCND2;CD48;CD52;CD53;CD83;CLEC2H;CORO1A;COTL1;CREM;CYTIP;DNAJB1;DUSP4;EVL;FGL2;FGR;FLNA;FPR1;FYB;GNG2;H2-AB1;H2-DMA;HCK;HCLS1;HK3;HSPH1;IER5;IGSF6;IL1B;IL2RB;ISG20;KLRK1;LST1;NCF2;PABPC4;PIP4K2A;PRKCQ;PTPRC;RAB31;RAC2;RGS2;RILPL2;RNASE6;RPL10A;RPL13;RPL13A;RPL18;RPL18A;RPL23A;RPL39;RPLP1;RPS12;RPS14;RPS15A;RPS1…	ADGRE5;AIF1;AKNA;ANXA1;ARHGAP30;ARHGDIB;ATM;ATP2B1;BCL2;BTG2;C3AR1;CBLB;CCR5;CD163;CD44;CD48;CD52;CD53;CNOT6L;CRYBG1;CSF1R;CTSS;CYBB;DGKA;DNAJA4;ETS1;FCER1G;FCGR3;FCGR4;FGD4;FGR;FLNA;FNBP1;FPR1;FYB;FYN;GBP5;GFOD1;GNG2;GNPTAB;HCK;HK3;HOPX;HSP90AA1;HSP90AB1;HSPH1;IER5;IGSF6;IKZF1;ISG20;ITGAL;ITGB2;KCTD12;KIT;LAPTM5;LEPROTL1;LST1;LYN;LYST;MAFB;MCTP2;MPEG1;NCF1;NCF2;NFKB1;NLRC5;P2RX7;PABPC4;PAG1;PBXI…	ADGRE5;ADGRG1;AIF1;AKNA;AOAH;ARHGAP25;ARHGAP30;ARHGAP9;ARHGDIB;ARL4C;ATM;ATP2B1;BCL2;CACYBP;CCDC88A;CCND2;CCR5;CD37;CD44;CD48;CD52;CD53;CD7;CD83;CDC42SE2;CELF2;CLEC2H;CNOT6L;CORO1A;COTL1;CSF1R;CTSS;CTSW;CXCR6;CYBB;CYFIP2;CYTIP;DENND2D;DGKA;DUSP4;EMB;ETS1;EVI2A;EVL;FCER1G;FCGR3;FCGR4;FGD4;FGL2;FLNA;FYB;FYN;GBP5;GNG2;GNPTAB;GPRIN3;GZMB;H2-AB1;H2-DMA;I830077J02RIK;IFI205;IGSF6;IKZF1;IKZF2;IKZF3;IL1B…	ADGRG1;AIF1;AKNA;ALOX5AP;AOAH;ARHGAP25;ARHGAP30;ARHGAP45;ARHGAP9;ARHGDIB;ARL4C;ATM;BIN2;CCDC88A;CCR5;CD163;CD37;CD48;CD52;CD53;CEBPB;CELF2;CMC1;CORO1A;COTL1;CRYBG1;CSF1R;CTSS;CXCL13;CYBB;CYFIP2;DENND2D;DGKA;EVI2A;EVL;FCER1G;FCGR4;FGL2;FGR;FNBP1;FPR1;FYB;GADD45B;GNG2;H2-AB1;H2-DMA;HCK;HCLS1;HK3;IGSF6;IKZF1;IKZF3;IL2RB;IRAK3;ITGAL;ITGAX;ITGB2;JARID2;KIT;KLF2;KLF4;KLRK1;LAPTM5;LCK;LST1;LTB;LYST;MAFB…	ADGRG1;AKNA;ALOX5AP;ANXA1;ARHGAP25;ARHGAP30;ARHGAP45;ARHGAP9;ARHGDIB;ARL4C;ATM;AUTS2;BCL2;BIN2;BTG1;BTG2;CCDC88A;CCR5;CD37;CD3G;CD7;CD83;CDC42SE2;CLEC2H;CORO1A;COTL1;CRYBG1;CXCR4;CYTIP;EMB;EML4;ETS1;EVL;FLNA;FYN;GADD45B;GFOD1;GNG2;GPRIN3;GZMA;GZMB;HBEGF;IER5;IGSF6;IKZF1;IKZF3;INPP4B;IPCEF1;ISG20;JARID2;KIT;KLF4;LCK;LTB;MBP;MDFIC;NFKB1;PABPC4;PARP8;PDE7A;PPP1R18;PRKCH;PRKCQ;PTPN4;PTPRCAP;RAB31;RAS…	ADGRG1;AIF1;AOAH;ARHGAP25;ARHGAP30;ARHGDIB;ATM;ATP2B1;AUTS2;BCL2;C3AR1;CCDC88A;CCND2;CD163;CD44;CD48;CD53;CELF2;CNOT6L;CRYBG1;CSF1R;CXCL13;CXCR4;CYBB;CYFIP2;EML4;ERN1;ETS1;EVI2A;EVL;FGD4;FGL2;FGR;FLNA;FPR1;FYB;FYN;GFOD1;GNG2;GNPTAB;GPRIN3;HBEGF;HCK;HCLS1;I830077J02RIK;IGSF6;IKZF1;IKZF2;IKZF3;IL1B;INPP4B;IRAK3;ITGAL;ITGB2;JARID2;KLF4;LAPTM5;LCP1;LNPEP;LST1;LYST;MAF;MBP;MS4A7;NCF1;NR3C1;P2RX7;PBXIP…	ADGRE5;AIF1;ANXA1;AOAH;ARHGAP25;ARHGAP45;ARHGAP9;ARPC5L;ATP6V1B2;BIN2;C3AR1;CD163;CD37;CD44;CD48;CD52;CD53;CDC42SE2;CEBPB;CELF2;CORO1A;COTL1;CRYBG1;CSF1R;CTSS;CXCL13;CYBB;DENND2D;DGKA;DNAJB1;ETS1;EVL;FCER1G;FCGR4;FGD4;FGL2;FGR;FLNA;FPR1;FYB;FYN;GADD45B;GBP5;H2-DMA;HBEGF;HCK;HCLS1;HK3;HOPX;HSPB1;I830077J02RIK;IER5;IGSF6;IKZF1;IL1B;IL2RB;IRAK3;ITGAL;ITGB2;JUNB;KCTD12;KIT;KLF2;LAPTM5;LNPEP;LST1;LYN;…	ADGRE5;ADGRG1;AIF1;AKNA;ALOX5AP;ANXA1;AOAH;ARHGAP30;ARHGAP45;ARHGAP9;ARHGDIB;ARL4C;ATP1B3;BAG3;BIN2;BTG1;BTG2;C3AR1;CBLB;CCND2;CD163;CD37;CD44;CD48;CD52;CD53;CD7;CD83;CDC42SE2;CEBPB;CELF2;CMC1;CRYBG1;CSF1R;CTSS;CXCL13;CXCR4;CYBB;CYFIP2;DNAJA1;DNAJA4;ETS1;EVI2A;EVL;FCER1G;FCGR3;FCGR4;FGL2;FGR;FLNA;FNBP1;FPR1;FYB;FYN;GFOD1;GNG2;GZMA;HCK;HCLS1;HK3;IER3;IER5;IGSF6;IKZF1;IL1B;IL2RB;ISG20;ITGAL;ITGAX;I…
Kupffer cells	-4.74417	2.02401	-1.71655	1.40451	0	-3.02644	-5.67308	3.01172	5.20191	-1.40079	-4.39861	-4.98571	-5.39733	0	0	2.76744	3.65387	5.35868	0	0.0345283	0.235063	0	0	0	0	0	0.000763889	0.136586	0	0	0	0	0	0	0	0	ACTB;AIF1;ANXA1;AP1S2;ARHGEF10L;ARPC1B;ARRB2;ASAH1;ATP6V1B2;AXL;BASP1;C1QA;C1QB;C1QC;CCDC88A;CD300E;CD37;CD44;CD52;CD55;CD5L;CD83;CD84;CD86;CD93;CDC42EP3;CFP;CKAP4;CLEC12A;COTL1;CPM;CSF1R;CTSB;CTSH;CXCR4;CYBA;CYBB;CYP2A4;DAB2;DUSP6;EPB41L2;EPB41L3;FABP5;FBLIM1;FCER1G;FCGR3;FGD2;FGL2;FGR;FILIP1L;FKBP1A;FOLR2;FPR1;FRMD4A;FYB;GADD45B;GCA;GK;GLIPR2;GMEB1;GNAI2;GPAT3;GZMB;HCK;HCLS1;HK3;HMOX1;ICOSL;IER…	ACOT9;ANXA1;ARPC1B;ASPG;ATP6V0B;ATP6V1B2;AXL;BASP1;BCL6;BLVRB;C1QA;C1QB;C1QC;C3AR1;CD37;CD83;CD84;CD93;CDC42EP3;CEBPB;CHRD;CIITA;CKAP4;COLGALT1;COTL1;CTSB;CTSH;CTSS;CXCL12;CXCL16;CXCR4;CYBA;CYBB;CYP2A4;DOK3;DPYSL2;DUSP6;EFHD2;FBLIM1;FCGRT;FGD2;FGL2;FKBP1A;FST;FTL1-PS1;GADD45B;GAS7;GLIPR2;GMFG;GNA13;GNAI2;GPAT3;GPT2;GPX1;GRINA;GRK2;GRN;H2-AB1;H2-DMA;H2-DMB1;HCLS1;HMOX1;ICOSL;IER5;IFNGR1;IL1RN;IRF8…	ACOT9;ADAP2;AIF1;AP1S2;ASAH1;ATP1B3;BASP1;BAZ1A;C3AR1;CALD1;CALM2;CCDC88A;CD163;CD300E;CD44;CD52;CD55;CD83;CD84;CD86;CD93;CDC42EP3;CFP;CLEC12A;CMTM6;CNTRL;CPPED1;CREG1;CRP;CSGALNACT2;CTSS;CXCL16;CYBB;DAB2;DDX21;DISP2;DPYSL2;DUSP6;EPB41L2;EPB41L3;FABP5;FCER1G;FCGR3;FCGR4;FGD4;FGL2;FGR;FILIP1L;FMNL2;FOLR2;FPR1;FRMD4A;FRMD4B;FYB;GAS7;GCA;GGPS1;GK;GLUL;H2-DMA;HCK;HCLS1;IFI205;IFIT3;IGSF6;IRAK3;ITGB2;…	ACOT9;ACTB;AIF1;AP1S2;ARRB2;ASPG;ATP1B3;ATP2B1;ATP6V0B;BAZ1A;BLVRB;C1QA;C3AR1;CD163;CD37;CD52;CEBPB;CFP;CHRD;CLN8;CNPY3;CPM;CRP;CXCR4;CYBA;CYP2A4;CYP3A13;DDX21;DPYSL2;DUSP6;ECHDC2;EFHD2;EMILIN2;FCGR3;FGR;FMNL2;FPR1;FRMD4A;GCA;GMEB1;GMFG;GPAT3;GPX1;GRINA;GRN;H2-AB1;H2-DMA;HCK;HERPUD1;HK3;IER3;IGSF6;IL13RA1;IL17RA;IL1RN;KLHL6;LGMN;LRRC25;LUC7L3;LY86;LYVE1;MAF;MAFB;MARCKS;MARCO;METRNL;MGAT1;MS4A4D;M…		ACOT9;AIF1;ANXA1;AP1S2;ARPC1B;ARRB2;ASPG;ATP6V0B;AXL;BLVRB;C1QA;C1QB;C1QC;CALM2;CCDC88A;CD300E;CD44;CD52;CD5L;CD83;CD84;CD86;CDC42EP3;CFP;CHRD;CKAP4;CLEC12A;COTL1;CSF1R;CSF3R;CTSC;CTSH;CTSS;CXCL16;CYBA;DAB2;DISP2;DOK3;DPYSL2;DUSP6;ECHDC2;EFNA1;EPB41L2;EPB41L3;FABP5;FBLIM1;FGD2;FGL2;FGR;FPR1;FST;FTL1-PS1;FYB;GAS7;GMFG;GNAI2;GRK2;H2-AB1;H2-DMA;H2-DMB1;HCK;HCLS1;HK3;IER5;IFI205;IGSF6;IL13RA1;IL18;IL…	ACOT9;ACSM2;ADAP2;AHR;AIF1;ANXA1;AP1S2;ARPC1B;ASAH1;ATP2B1;AXL;BAZ1A;BCL6;C1QA;C1QB;C1QC;C3AR1;CD14;CD163;CD4;CD44;CD5L;CD86;CD93;CFP;CKAP4;CLEC12A;CLN8;CNTRL;CRP;CSF1R;CTSC;CTSS;CXCL16;CYBB;CYP3A13;DDX21;DISP2;EMILIN2;EPB41L2;FABP5;FCER1G;FCGR3;FCGR4;FGR;FILIP1L;FMNL2;FOLR2;FPR1;FRMD4A;FRMD4B;FYB;GCA;GLIPR2;GRN;H6PD;HCK;HERPUD1;HK3;HMOX1;IER5;IFIT3;IFNGR1;IGSF6;IL13RA1;IL17RA;IL1RN;IL6RA;IRF8;IT…	ACOT9;ACSM2;ADAP2;AGFG1;AHR;AIF1;ANXA1;AP1S2;APLP2;ARPC1B;ARRB2;ASAH1;ATP1B3;ATP2B1;ATP6V0B;AXL;BASP1;BCL6;BLVRB;C1QA;C1QB;C1QC;CALHM6;CALM2;CCDC88A;CD14;CD300E;CD37;CD44;CD52;CD5L;CD83;CD84;CD86;CDC42EP3;CELF2;CFD;CFP;CIITA;CKAP4;CLEC12A;COLGALT1;COTL1;CPM;CPPED1;CREG1;CSF1R;CTSB;CTSH;CTSS;CXCL12;CXCL16;CYBA;CYBB;CYFIP1;CYP4F18;DAB2;DPYSL2;DUSP6;ECHDC2;EFHD2;EPB41L2;EPB41L3;FBLIM1;FCER1G;FCGR3;F…	ACOT9;ADAP2;AHR;AIF1;AP1S2;ARHGEF10L;ARPC1B;ARRB2;ASAH1;ASPG;AXL;BASP1;BCL6;BLVRB;C1QA;C1QB;C1QC;CALHM6;CALM2;CCDC88A;CD14;CD163;CD300E;CD37;CD52;CD55;CD5L;CD84;CEBPB;CELF2;CFD;CFP;CIITA;CKAP4;CLEC12A;COTL1;CRP;CSF1R;CSF3R;CTSB;CTSC;CTSS;CXCL12;CXCL16;CYBA;CYBB;CYP2A4;CYP3A13;DAB2;DISP2;EFHD2;EMILIN2;EPB41L3;FCER1G;FCGR3;FCGR4;FCGRT;FGD2;FGL2;FGR;FILIP1L;FOLR2;FPR1;FRMD4A;FYB;GADD45B;GCA;GLUL;GMF…	ACTB;ANXA1;ARHGEF10L;ARPC1B;AXL;BASP1;CALM2;CCDC88A;CD37;CD4;CD83;CD86;CD93;CDC42EP3;CKAP4;COTL1;CPM;CXCR4;CYBA;DAB2;EFNA1;EPB41L2;EPB41L3;FABP5;FBLIM1;FGD2;FILIP1L;FKBP1A;FOLR2;FST;GADD45B;GCA;GLIPR2;GMEB1;GNAI2;GZMB;HBEGF;HMOX1;ICOSL;IER5;IFNGR1;IGSF6;IRF8;ITIH3;ITSN1;JARID2;JDP2;KCNAB2;KDM6B;KLF4;KLHL6;KLHL8;LGMN;LIMS1;LRRC25;LRRK2;LYVE1;MAP3K8;MARCKS;MARCO;MEGF9;MIS18BP1;MPP1;MSR1;MYH11;NLRP3…	ACOT9;ACTB;ADAP2;AGFG1;AHR;AIF1;AP1S2;ARRB2;ASAH1;ATP2B1;AXL;BASP1;BAZ1A;BCL6;C3AR1;CCDC88A;CD163;CD300E;CD44;CD55;CD5L;CD84;CD93;CDC42EP3;CELF2;CFP;CKAP4;CLEC12A;CNTRL;CPM;CPPED1;CSF1R;CSF3R;CXCL12;CXCL16;CXCR4;CYBB;CYFIP1;CYP3A13;DDX21;DOK3;DPYSL2;EFNA1;EMILIN2;EPB41L2;EPB41L3;FBLIM1;FGD2;FGD4;FGL2;FGR;FILIP1L;FMNL2;FOLR2;FPR1;FRMD4A;FST;FYB;GAS7;GCA;GLUL;GNAI2;HBEGF;HCK;HCLS1;HMOX1;I830077J02R…	ACADVL;ACOT9;ACTB;AHR;AIF1;ANXA1;AP1B1;AP1S2;ARPC1B;ASPG;ATP6V0B;ATP6V1B2;AXL;BASP1;BCL6;BLVRB;C1QA;C1QB;C1QC;C3AR1;CALHM6;CD14;CD163;CD300E;CD37;CD44;CD52;CD55;CD5L;CD84;CD86;CD93;CEBPB;CFP;CHRD;CIITA;CKAP4;CLEC12A;CLN8;CNPY3;COTL1;CPM;CSF1R;CSF3R;CTSH;CTSS;CXCL16;CYBA;CYBB;CYP3A13;DISP2;DOK3;EFHD2;EMILIN2;FCER1G;FCGR4;FCGRT;FGD2;FGD4;FGL2;FGR;FOLR2;FPR1;FRMD4A;GADD45B;GAS7;GLIPR2;GLUL;GMFG;GPT2…	AHR;AIF1;ANXA1;AP1S2;ASPG;ATP1B3;ATP6V0B;AXL;C1QA;C1QB;C1QC;C3AR1;CALHM6;CCDC69;CD14;CD163;CD300E;CD37;CD44;CD52;CD55;CD5L;CD84;CD86;CD93;CDC42EP3;CELF2;CFP;CKAP4;CLEC12A;CNTRL;COLGALT1;CPM;CSF1R;CSF3R;CSGALNACT2;CTSB;CTSH;CTSS;CXCL16;CXCR4;CYBA;CYBB;CYP3A13;CYP4F18;DAB2;DISP2;DOK3;DPYSL2;ECHDC2;EMILIN2;EPB41L2;FBLIM1;FCER1G;FCGR3;FCGR4;FCGRT;FGD2;FGL2;FGR;FILIP1L;FOLR2;FPR1;FRMD4A;FYB;GMFG;GPAT3…
Endothelial	-6.38167	1.67735	-5.00774	-1.44996	-1.65266	1.55545	-3.77004	3.10201	4.06673	-5.32425	-7.20097	-1.83186	-4.22574	1.51395	-4.05905	3.79792	3.56532	0	0	0	0.117906	0.0328698	0.0758274	0	0	0	0	0	0	0.0180919	0	0.110973	0	0	0	0	ABCG1;ABI3BP;ACKR3;ACTN1;ACVRL1;ADAM15;ADAMTS1;ADAMTS9;ADCY4;ADD3;ADGRF5;ADGRG1;ADGRG6;ADGRL4;ADM;AKAP12;ANGPT2;ANXA1;ANXA2;APOLD1;APP;AQP1;ARAP3;ARGLU1;ARHGAP23;ARHGAP31;ARHGEF7;AVPI1;BCAM;BMP4;BTNL9;C1QTNF1;CALCRL;CALU;CASKIN2;CAV1;CAV2;CAVIN1;CAVIN2;CCDC50;CCM2L;CD320;CD34;CD55;CD93;CDC42EP3;CDH13;CDH5;CDKN1A;CEBPD;CEMIP2;CFP;CHSY1;CLDN5;CLEC14A;CLEC4G;CLIC4;CNKSR3;CNN3;COL3A1;COL4A1;COL4A2;CO…	ABCG1;ABLIM1;ACP5;ACVRL1;ADAM15;ADAMTS9;ADGRG1;ADGRG6;AHNAK;ANGPT2;ANXA1;ANXA2;APOLD1;APP;AVPI1;B4GALT5;BCAM;BGN;BMP4;BST2;CAVIN1;CD320;CD34;CDC42EP3;CEBPD;COL3A1;COL4A1;COL4A2;COL6A2;COL8A1;CRIM1;CRTAP;CSRP1;CTNNAL1;CXCL12;DKK3;DLL1;DPYSL2;DPYSL3;EHD2;EMP1;EMP2;FAM107A;FBLN2;FCGRT;FGF2;FGFR1;FKBP1A;FOSL2;FRMD8;FZD4;GAS6;GJA1;GM13889;GNG11;GPM6A;GPX3;GRB10;GSN;HDAC7;HIC1;ICAM1;ID1;IGFBP4;IGFBP7;I…	ABI3BP;ADAMTS9;ADCY4;ADD3;ADGRF5;ADGRG1;ADGRG6;ADGRL4;ADM;AHCTF1;AHNAK;ANGPT2;ANKRD11;APP;ARGLU1;ARHGAP29;ARHGAP31;ARID5B;ARL15;ARL4A;ASAP1;ATP1B3;B2M;BCAM;BDP1;BGN;BMPR2;BMYC;BTNL9;C1QTNF1;C5AR2;C7;CALCRL;CAMSAP2;CAV1;CAVIN2;CD300LG;CD55;CD93;CDC42EP3;CDH13;CDH5;CDKN1A;CEMIP2;CEP170;CFLAR;CHSY1;CLEC14A;CLEC1B;CLEC4G;CLIC4;CRIP2;CUL4B;CXCL9;CYB5R3;CYYR1;DAB2;DCUN1D3;DENND4C;DLC1;DNASE1L3;DNTTIP2;…	ABI3BP;ABLIM1;ACP5;ACTN1;ACVRL1;ADAM9;ADAMTS1;ADD3;ADGRF5;ADGRG1;ADGRL2;ADGRL4;AFF4;AHNAK;ALPL;ANKRD11;ANKS1;ANPEP;ANXA1;ANXA2;APP;AQP1;ARGLU1;ARHGAP23;ARHGAP29;ARHGAP31;ARHGEF7;ARL15;ARL4A;ARSG;ASAP1;B2M;B4GALT1;BCAM;BDP1;BGN;BHLHE40;BMP4;BMPR2;BMYC;BSDC1;BTNL9;C1QTNF1;CALCRL;CALU;CASKIN2;CAV1;CAVIN1;CCDC50;CCM2L;CD14;CD151;CD300LG;CD34;CD36;CD4;CD55;CD59A;CD9;CD93;CDC37;CDC42BPB;CDC42EP3;CDC42E…	ABCG1;ABI3BP;ACTN1;ACVRL1;ADAM9;ADAMTS1;ADCY4;ADD3;ADGRF5;ADGRG1;ADGRL2;ADGRL4;AFF4;AHCTF1;AHNAK;AKAP12;ANKRD11;ANKS1;ANPEP;APOLD1;AQP1;ARAP3;ARHGAP23;ARHGAP31;ARHGEF7;ARL4A;ARSG;ASAP1;ATP13A3;BCAM;BHLHE40;BMPR2;BNIP3L;BSDC1;BTNL9;C1QTNF1;CALCRL;CALU;CASKIN2;CAV1;CAVIN1;CCM2L;CD14;CD300LG;CD34;CD36;CD4;CD55;CD93;CDC42BPB;CDC42EP3;CDH13;CDH5;CDK17;CEMIP2;CGNL1;CHD7;CHSY1;CLDN5;CLEC14A;CLEC1B;CLEC3…	ADAM9;ADGRF5;ADGRG1;ADGRL2;ADGRL4;AFF1;AFF4;AHCTF1;ALPL;ANGPTL4;ANKRD11;ANKS1;ANPEP;ARHGEF7;ARL15;ARL4A;ATP13A3;ATP1A1;B2M;BAZ1A;BDP1;BMPR2;BMYC;BNIP3L;BSDC1;C1QTNF1;CAMSAP2;CAV1;CD36;CD9;CD93;CDC42EP4;CDH13;CDKN1A;CEBPD;CEMIP2;CGNL1;CHD7;CMIP;CNKSR3;COL4A1;COL4A2;CRIM1;CRIP2;CXCL12;CYYR1;DCUN1D3;DDX21;DDX3Y;DENND4C;DNMBP;DNTTIP2;DSTN;ECE1;EDNRB;EEA1;EIF4G3;EIF5B;EPAS1;ETS2;F2R;F8;FAM107A;FCGR3;F…	ABCG1;ABI3BP;ABLIM1;ACTN1;ACVRL1;ADAM9;ADCY4;ADGRF5;ADM;AFF4;AHCTF1;AKAP12;ALPL;ANGPTL4;ANKS1;ANPEP;ANXA1;APP;ARAP3;ARHGAP31;ARHGEF7;ARID5B;ARL15;ARSG;B4GALT5;BAZ1A;BDP1;BGN;BMP4;BTNL9;C1QTNF1;C5AR2;CALU;CAMSAP2;CASKIN2;CAV2;CAVIN2;CD14;CD4;CD9;CD93;CDC42BPB;CDH5;CDK17;CDKN1A;CEMIP2;CFLAR;CFP;CGNL1;CHD7;CHRM3;CLEC14A;CLEC1B;CLIC4;COL15A1;COL3A1;COL4A1;COL4A2;COL6A2;CPNE2;CRIM1;CSNK1E;CSRP1;CXCL16…	ABCG1;ABI3BP;ACKR3;ACTN1;ACVRL1;ADAM15;ADAMTS9;ADCY4;ADD3;ADGRF5;ADGRG1;ADGRG6;ADGRL4;AFF1;AHNAK;AKAP12;ANPEP;ANXA2;APOLD1;APP;ARAP3;ARGLU1;ARHGAP23;ARHGAP29;ATP1A1;B4GALT5;BCAM;BGN;BHLHE40;BMP4;BMPR2;BNIP3L;BTNL9;C7;CALCRL;CAPZA2;CAV1;CAV2;CAVIN1;CAVIN2;CCDC50;CCM2L;CD14;CD151;CD300LG;CD34;CD36;CD59A;CDC42BPB;CDC42EP3;CDH13;CFLAR;CFP;CGNL1;CHSY1;CLDN5;CLEC14A;CLEC1B;CMIP;CNKSR3;CNN3;COL3A1;COL6A…	ABCG1;ABI3BP;ACTN1;ACVRL1;ADAM15;ADAMTS1;ADCY4;ADD3;ADGRF5;ADGRG1;ADGRL2;ADGRL4;AKAP12;ANPEP;ANXA2;APOLD1;AQP1;ARAP3;ARHGAP23;ARHGAP31;ATP1A1;AVPI1;BGN;BHLHE40;C1QTNF1;C5AR2;C7;CALCRL;CASKIN2;CAV2;CCM2L;CD14;CD151;CD300LG;CD320;CD36;CD55;CDC42EP4;CDH13;CDH5;CEBPD;CEMIP2;CFP;CGNL1;CHD7;CHSY1;CLDN5;CLEC14A;CLEC1B;CLEC4G;CMIP;CNKSR3;CNN3;COL15A1;COL3A1;COL6A2;CSNK1E;CSRP1;CTNNAL1;CXCL12;CXCL16;CXCL9…	ABCG1;ACKR3;ACTN1;ACVRL1;ADAM15;ADAMTS1;ADAMTS9;ADGRG1;ADM;AHNAK;AKAP12;ANGPT2;ANXA1;ANXA2;APOLD1;APP;ARAP3;ARHGAP23;ARHGAP31;ARHGEF7;ARSG;AVPI1;BCAM;BMP4;C1QTNF1;CALCRL;CALU;CASKIN2;CAV1;CAV2;CAVIN1;CAVIN2;CCDC50;CCM2L;CD209G;CD34;CD4;CD93;CDC42EP3;CDH5;CDKN1A;CEBPD;CEMIP2;CHSY1;CLDN5;CLEC14A;CLIC4;CNKSR3;COL3A1;COL4A1;COL4A2;COL6A2;COL8A1;CPE;CPNE2;CRTAP;CSNK1E;CSRP1;CYYR1;DAB2;DPYSL3;DUSP5;DYS…	ABCG1;ABI3BP;ACP5;ACTN1;ACVRL1;ADAMTS1;ADAMTS9;ADD3;ADGRF5;ADGRG1;ADGRG6;ADGRL2;ADGRL4;AFF4;AHNAK;AKAP12;ANGPT2;ANKRD11;ANXA2;APOLD1;AQP1;ARAP3;ARHGAP23;ARHGAP31;ASAP1;ATP13A3;ATP1A1;B4GALT5;BAZ1A;BCAM;BDP1;BGN;BHLHE40;BMP4;BMPR2;BTNL9;C1QTNF1;C5AR2;C7;CALCRL;CAMSAP2;CASKIN2;CAV1;CAV2;CAVIN1;CAVIN2;CCDC50;CD300LG;CD34;CD55;CD93;CDC42EP3;CDH13;CDH5;CEMIP2;CEP170;CFLAR;CFP;CGNL1;CHD7;CHSY1;CLEC14A;…	ABCG1;ACP5;ACVRL1;ADGRF5;ADGRG6;AHNAK;ANKS1;AQP1;ARHGAP23;ARHGAP31;ATP1A1;AVPI1;BCAM;BST2;C1QTNF1;C5AR2;CASKIN2;CAV2;CAVIN2;CD14;CD300LG;CD36;CDC42EP4;CDH5;CEBPD;CEMIP2;CFP;CLDN5;CLEC14A;CLEC4G;COL3A1;COL4A1;DLL1;DUSP5;DYSF;ECM1;EGFL7;EPHB4;ESAM;EXOC3L2;F2R;F8;FAM167B;FCGRT;FGD5;FLNB;FLT1;FLT4;FNIP2;FRMD8;FSCN1;FZD4;GAS6;GJA4;GNAS;GNG11;GSN;HDAC7;HECW2;HES1;HIC1;HSPB1;ICAM1;ID3;IGFBP4;IL1R1;INMT;…	ABCG1;ABI3BP;ACKR1;ACVRL1;ADAMTS1;ADCY4;ADGRF5;ADGRG1;ADGRL4;AFF4;ALPL;ANGPTL4;ANKS1;ANXA1;APOLD1;APP;AQP1;ARAP3;ARHGAP23;ARID5B;ARL4A;ATP1A1;ATP1B3;BDP1;BGN;BMPR2;BNIP3L;BTNL9;C1QTNF1;C5AR2;CALCRL;CALU;CAMSAP2;CAPZA2;CAV2;CAVIN1;CAVIN2;CD14;CD151;CD300LG;CD320;CD34;CD36;CD55;CD93;CDC37;CDC42EP3;CDH5;CDK17;CDKN1A;CEBPD;CEMIP2;CFP;CGNL1;CHD7;CHSY1;CLDN5;CLEC14A;CLEC1B;CLEC3B;CLEC4G;CLIC4;CNKSR3;CO…
[truncated: 5 more columns]

## Sheet: SuppTable9b_ORA_male
Supplemental Table 9b: Over Representation Analysis (ORA) using MALE liver cell-type core genes (Figure 6c)
Over Representation Analysis (ORA) performed using MSigDB C5 Gene Ontology Biolotical Process (GOBP) genesets (v7.5.1)
Values in Columns B–P show –log10 (adj pValue)
GeneSet	-log10(adj pValue) Hepatocytes_M_5mo_BPA.hi CoreGenes (n=258)	-log10(adj pValue) Hepatocytes_M_5mo_TBT CoreGenes (n=241)	-log10(adj pValue) Hepatocytes_M_5mo_TCDD CoreGenes (n=209)	-log10(adj pValue) Stellate_M_5mo_BPA.hi CoreGenes (n=114)	-log10(adj pValue) Stellate_M_5mo_TBT CoreGenes (n=137)	-log10(adj pValue) Stellate_M_5mo_TCDD CoreGenes (n=105)	-log10(adj pValue) Kupffer_M_5mo_BPA.hi CoreGenes (n=151)	-log10(adj pValue) Kupffer_M_5mo_TBT CoreGenes (n=252)	-log10(adj pValue) Kupffer_M_5mo_TCDD CoreGenes (n=208)	-log10(adj pValue) NK_M_5mo_BPA.hi CoreGenes (n=193)	-log10(adj pValue) NK_M_5mo_TBT CoreGenes (n=164)	-log10(adj pValue) NK_M_5mo_TCDD CoreGenes (n=125)	-log10(adj pValue) Endo_M_5mo_BPA.hi CoreGenes (n=142)	-log10(adj pValue) Endo_M_5mo_TBT CoreGenes (n=312)	-log10(adj pValue) Endo_M_5mo_TCDD CoreGenes (n=297)	Overlapping gene count Hepatocytes_M_5mo_BPA.hi CoreGenes	Overlapping gene count Hepatocytes_M_5mo_TBT CoreGenes	Overlapping gene count Hepatocytes_M_5mo_TCDD CoreGenes	Overlapping gene count Stellate_M_5mo_BPA.hi CoreGenes	Overlapping gene count Stellate_M_5mo_TBT CoreGenes	Overlapping gene count Stellate_M_5mo_TCDD CoreGenes	Overlapping gene count Kupffer_M_5mo_BPA.hi CoreGenes	Overlapping gene count Kupffer_M_5mo_TBT CoreGenes	Overlapping gene count Kupffer_M_5mo_TCDD CoreGenes	Overlapping gene count NK_M_5mo_BPA.hi CoreGenes	Overlapping gene count NK_M_5mo_TBT CoreGenes	Overlapping gene count NK_M_5mo_TCDD CoreGenes	Overlapping gene count Endo_M_5mo_BPA.hi CoreGenes	Overlapping gene count Endo_M_5mo_TBT CoreGenes	Overlapping gene count Endo_M_5mo_TCDD CoreGenes	Overlapping genes Hepatocytes_M_5mo_BPA.hi CoreGenes	Overlapping genes Hepatocytes_M_5mo_TBT CoreGenes	Overlapping genes Hepatocytes_M_5mo_TCDD CoreGenes	Overlapping genes Stellate_M_5mo_BPA.hi CoreGenes	Overlapping genes Stellate_M_5mo_TBT CoreGenes	Overlapping genes Stellate_M_5mo_TCDD CoreGenes	Overlapping genes Kupffer_M_5mo_BPA.hi CoreGenes	Overlapping genes Kupffer_M_5mo_TBT CoreGenes	Overlapping genes Kupffer_M_5mo_TCDD CoreGenes	Overlapping genes NK_M_5mo_BPA.hi CoreGenes	Overlapping genes NK_M_5mo_TBT CoreGenes	Overlapping genes NK_M_5mo_TCDD CoreGenes	Overlapping genes Endo_M_5mo_BPA.hi CoreGenes	Overlapping genes Endo_M_5mo_TBT CoreGenes	Overlapping genes Endo_M_5mo_TCDD CoreGenes
GOBP_SMALL_MOLECULE_METABOLIC_PROCESS	12.733	11.827	13.426													44	42	39													OAT;MLXIPL;BAAT;SCP2;SRD5A1;QDPR;ABCA1;ADI1;SOD1;ALDH1A7;PHYH;EPHX2;ALDH1L1;TAT;GNMT;GLYAT;BHMT;ADH4;CYP27A1;ALDH6A1;GHR;CYP3A13;SULT2A7;ACACB;HAAO;CAT;GC;APOA2;PROX1;MSMO1;H6PD;APOB;VNN1;HMGCS2;SLC27A2;ACAD11;AASS;LONP2;FABP1;ACSL1;ACADSB;ANGPTL3;STAT3;IDH1	ABCA1;ACACB;APOC3;APOB;GLYCTK;APOA2;CYP3A13;STAT3;HMGCS2;ACADSB;FABP1;SLC27A5;GC;SDS;OAT;IDH1;SRD5A1;CYP2D10;PROX1;HAAO;PCK1;EPHX2;QDPR;ABAT;CYP27A1;ASPG;SCP2;AASS;H6PD;TAT;BHMT;ATP5J;ACAD11;APOC1;LONP2;NNMT;FMO5;ALDH2;FTCD;GNMT;APOA5;ALDH1L1	TDO2;CYP2D10;FTCD;MLXIPL;HAAO;H6PD;GLYAT;TAT;HMGCS2;PHYH;CAT;HGD;STAT3;EPHX2;GNMT;SRD5A1;ABAT;AASS;ECHDC2;NADK2;PCK1;CRYL1;CSAD;SCP2;BAAT;GHR;ANGPTL3;BHMT;CYP4A32;GLYCTK;ACSL1;EPHX1;QDPR;ASL;RIDA;CYP8B1;ACADSB;ALDH6A1;FABP1
GOBP_SMALL_MOLECULE_CATABOLIC_PROCESS	9.15	10.153	11.338													19	20	19													OAT;SCP2;QDPR;PHYH;ALDH1L1;TAT;ADH4;CYP27A1;ALDH6A1;CYP3A13;SULT2A7;ACACB;HAAO;SLC27A2;ACAD11;AASS;LONP2;FABP1;ACADSB	ACACB;GLYCTK;CYP3A13;FABP1;ACADSB;SDS;OAT;HAAO;PCK1;QDPR;ABAT;CYP27A1;SCP2;AASS;TAT;ACAD11;LONP2;ALDH2;FTCD;ALDH1L1	TDO2;FTCD;HAAO;TAT;PHYH;HGD;ABAT;AASS;ECHDC2;PCK1;CSAD;SCP2;CYP4A32;GLYCTK;QDPR;RIDA;ACADSB;ALDH6A1;FABP1
GOBP_ORGANIC_ACID_METABOLIC_PROCESS	13.329	10.153	15.27													34	29	32													OAT;MLXIPL;BAAT;SCP2;QDPR;ADI1;ALDH1A7;PHYH;ALDH1L1;TAT;GNMT;GLYAT;BHMT;ADH4;ALDH6A1;CYP27A1;GHR;CYP3A13;SULT2A7;ACACB;HAAO;PROX1;MSMO1;VNN1;SLC27A2;ACAD11;AASS;LONP2;FABP1;ACSL1;ACADSB;ANGPTL3;STAT3;IDH1	ACACB;APOC3;CYP3A13;FABP1;STAT3;ACADSB;SLC27A5;SDS;OAT;IDH1;CYP2D10;PROX1;HAAO;PCK1;QDPR;ABAT;CYP27A1;ASPG;SCP2;AASS;TAT;BHMT;ACAD11;APOC1;LONP2;FTCD;GNMT;APOA5;ALDH1L1	TDO2;CYP2D10;FTCD;MLXIPL;HAAO;GLYAT;TAT;PHYH;HGD;STAT3;GNMT;ABAT;AASS;ECHDC2;PCK1;CRYL1;CSAD;SCP2;BAAT;GHR;ANGPTL3;BHMT;CYP4A32;ACSL1;EPHX1;QDPR;ASL;RIDA;CYP8B1;ACADSB;ALDH6A1;FABP1
GOBP_SMALL_MOLECULE_BIOSYNTHETIC_PROCESS	8.074	9.918	6.679													21	23	17													OAT;MLXIPL;BAAT;SCP2;QDPR;ADI1;SOD1;ALDH1A7;GNMT;BHMT;CYP27A1;CYP3A13;ACACB;HAAO;PROX1;MSMO1;APOB;H6PD;HMGCS2;SLC27A2;AASS	ACACB;APOC3;APOB;HMGCS2;CYP3A13;SLC27A5;SDS;OAT;CYP2D10;PROX1;HAAO;PCK1;QDPR;ABAT;CYP27A1;SCP2;AASS;H6PD;BHMT;APOC1;NNMT;GNMT;APOA5	AASS;CYP4A32;HMGCS2;CYP2D10;QDPR;PCK1;MLXIPL;ASL;GNMT;CSAD;SCP2;BAAT;HAAO;CYP8B1;ABAT;BHMT;H6PD
GOBP_HUMORAL_IMMUNE_RESPONSE_MEDIATED_BY_CIRCULATING_IMMUNOGLOBULIN	6.501	9.298	3.499				1.896	2.245	3.393							8	10	5				3	4	5							C6;SERPING1;HC;C8A;C8B;C4BP;C9;CRP	C8B;HPX;HC;SERPING1;C6;C8A;CRP;C9;CLU;C4BP	C6;C8A;C8B;C9;HC				C1QA;C1QB;C1QC	C1QC;C1QA;FCGR3;C1QB	C1QB;FCGR3;CD55;C1QC;C1QA
GOBP_ORGANIC_ACID_CATABOLIC_PROCESS	9.055	9.298	13.073													16	16	18													PHYH;OAT;ALDH1L1;SULT2A7;ACAD11;SLC27A2;ACACB;AASS;TAT;SCP2;HAAO;LONP2;FABP1;ACADSB;QDPR;ALDH6A1	LONP2;ACACB;SCP2;AASS;HAAO;FTCD;PCK1;FABP1;ACADSB;QDPR;TAT;SDS;ALDH1L1;OAT;ACAD11;ABAT	AASS;TAT;TDO2;CYP4A32;PHYH;ECHDC2;QDPR;PCK1;HGD;FTCD;RIDA;CSAD;SCP2;ACADSB;HAAO;ABAT;ALDH6A1;FABP1
GOBP_STEROID_METABOLIC_PROCESS	10.451	9.062	3.969													19	17	10													BAAT;SCP2;SRD5A1;ABCA1;SOD1;EPHX2;CYP27A1;CYP3A13;SULT2A7;CAT;GC;APOA2;PROX1;MSMO1;H6PD;APOB;HMGCS2;SLC27A2;ANGPTL3	APOA5;CYP27A1;ABCA1;SRD5A1;SCP2;CYP2D10;PROX1;APOB;H6PD;FMO5;APOA2;CYP3A13;EPHX2;HMGCS2;SLC27A5;GC;APOC1	HMGCS2;CAT;CYP2D10;SRD5A1;EPHX2;SCP2;BAAT;H6PD;CYP8B1;ANGPTL3
GOBP_COMPLEMENT_ACTIVATION	6.251	9.031	4.502				1.83	3.937	5.33							8	10	6				3	6	7							C6;SERPING1;HC;C8A;C8B;C4BP;C9;CRP	C8B;HC;SERPING1;C6;C8A;C9;CRP;CLU;CFHR1;C4BP	C6;C8A;CFHR1;C8B;C9;HC				C1QA;C1QB;C1QC	CFP;CD5L;C1QB;C1QC;C1QA;VSIG4	C1QB;CD55;C1QC;CD5L;C1QA;VSIG4;CFP
GOBP_ORGANIC_HYDROXY_COMPOUND_METABOLIC_PROCESS	9.758	8.662	4.604					1.831								23	21	14					11								BAAT;SCP2;SRD5A1;QDPR;ABCA1;SOD1;ALDH1A7;EPHX2;ADH4;CYP27A1;CYP3A13;SULT2A7;CAT;GC;APOA2;PROX1;MSMO1;APOB;H6PD;HMGCS2;SLC27A2;ANGPTL3;IDH1	ABCA1;APOB;APOA2;CYP3A13;HMGCS2;SLC27A5;GC;IDH1;SRD5A1;CYP2D10;PROX1;PCK1;EPHX2;QDPR;ABAT;CYP27A1;SCP2;H6PD;FMO5;ALDH2;APOA5	CYP4A32;HMGCS2;CAT;CYP2D10;QDPR;PCK1;SRD5A1;EPHX2;SCP2;BAAT;H6PD;CYP8B1;ABAT;ANGPTL3					PTAFR;CTSB;LGMN;DAB2;NPC2;ASAH1;GK;PLEK;LIPA;ZEB2;ITGB2
GOBP_LIPID_CATABOLIC_PROCESS	6.534	8.662	3.032													15	17	9													PHYH;CYP3A13;CYP27A1;SULT2A7;ACAD11;SLC27A2;ACACB;SCP2;LONP2;FABP1;SRD5A1;ANGPTL3;APOA2;IDH1;APOB	IDH1;LONP2;ASPG;ACACB;SRD5A1;SCP2;APOC3;APOB;CYP27A1;APOA2;CYP3A13;PCK1;FABP1;APOA5;AADAC;ACAD11;APOC1	CYP4A32;PHYH;ECHDC2;PCK1;AADAC;SCP2;SRD5A1;ANGPTL3;FABP1
GOBP_LIPID_METABOLIC_PROCESS	8.631	8.657	6.201													33	32	25													MLXIPL;SERPINA3N;BAAT;SCP2;SRD5A1;ABCA1;SOD1;ALDH1A7;PHYH;EPHX2;ANGPTL4;ADH4;CYP27A1;CYP3A13;SULT2A7;ACACB;CAT;GC;APOA2;PROX1;MSMO1;H6PD;APOB;ID2;HMGCS2;SLC27A2;ACAD11;LONP2;FABP1;ACSL1;ACADSB;ANGPTL3;IDH1	ABCA1;ACACB;APOC3;APOB;APOA2;CYP3A13;HMGCS2;FABP1;ACADSB;SLC27A5;GC;SDS;IDH1;SRD5A1;CYP2D10;PROX1;PCK1;EPHX2;SERPINA3N;CLU;CYP27A1;ASPG;SCP2;H6PD;ID2;AADAC;ACAD11;APOC1;LONP2;FMO5;ANGPTL4;APOA5	CYP2D10;MLXIPL;H6PD;HMGCS2;PHYH;CAT;ID2;EPHX2;SRD5A1;ECHDC2;PCK1;CRYL1;SCP2;BAAT;AOX1;ANGPTL3;CYP4A32;ACSL1;ANGPTL4;EPHX1;RIDA;CYP8B1;ACADSB;AADAC;FABP1
GOBP_REGULATION_OF_LIPID_METABOLIC_PROCESS	5.583	8.418	2.299							1.304						14	17	8							6						EPHX2;MLXIPL;SERPINA3N;ID2;ACACB;LONP2;FABP1;ANGPTL3;APOA2;PROX1;SOD1;IDH1;H6PD;APOB	IDH1;LONP2;ACACB;APOC3;APOB;PROX1;H6PD;FMO5;APOA2;PCK1;EPHX2;FABP1;SERPINA3N;ID2;APOA5;AADAC;APOC1	ANGPTL3;ID2;PCK1;MLXIPL;EPHX2;H6PD;AADAC;FABP1							NFKB1;PIP4K2A;FGR;LYN;ANXA1;NPC2
GOBP_MONOCARBOXYLIC_ACID_METABOLIC_PROCESS	9.935	8.256	8.991													24	21	20													MLXIPL;BAAT;SCP2;ALDH1A7;PHYH;GLYAT;ADH4;CYP27A1;CYP3A13;SULT2A7;ACACB;HAAO;PROX1;MSMO1;VNN1;SLC27A2;ACAD11;LONP2;FABP1;ACSL1;ACADSB;ANGPTL3;STAT3;IDH1	ACACB;APOC3;CYP3A13;FABP1;STAT3;ACADSB;SLC27A5;SDS;IDH1;CYP2D10;PROX1;HAAO;PCK1;ABAT;CYP27A1;SCP2;ACAD11;APOC1;LONP2;FTCD;APOA5	CYP2D10;FTCD;MLXIPL;HAAO;GLYAT;PHYH;STAT3;ABAT;ECHDC2;PCK1;CRYL1;SCP2;BAAT;ANGPTL3;CYP4A32;ACSL1;EPHX1;CYP8B1;ACADSB;FABP1
GOBP_ORGANIC_ACID_BIOSYNTHETIC_PROCESS	6.097	8.236	5.557													14	16	12													OAT;CYP3A13;MLXIPL;SLC27A2;ACACB;BAAT;SCP2;HAAO;AASS;BHMT;PROX1;ADI1;ALDH1A7;CYP27A1	CYP27A1;ACACB;APOC3;BHMT;SCP2;CYP2D10;PROX1;HAAO;AASS;ABAT;CYP3A13;SLC27A5;APOA5;SDS;OAT;APOC1	AASS;CYP4A32;CYP2D10;MLXIPL;ASL;CSAD;SCP2;BAAT;HAAO;CYP8B1;ABAT;BHMT
GOBP_REGULATION_OF_LIPID_CATABOLIC_PROCESS	4.009	7.807	1.545													6	9	3													ACACB;FABP1;LONP2;ANGPTL3;APOA2;IDH1	IDH1;LONP2;ACACB;APOC3;APOA2;FABP1;APOA5;AADAC;APOC1	FABP1;ANGPTL3;AADAC
GOBP_HUMORAL_IMMUNE_RESPONSE	4.593	7.61	2.185				1.355	5.063	4.765	1.592	2.437					10	13	6				4	11	10	5	6					C6;SERPING1;HC;HRG;C8A;C8B;C4BP;C9;CRP;FGB	C8B;HPX;SERPING1;HC;FGB;HRG;C6;C8A;CRP;C9;CFHR1;CLU;C4BP	C6;C8A;CFHR1;C8B;C9;HC				CD83;C1QA;C1QB;C1QC	CFP;CD83;CD5L;FCGR3;C1QB;C1QC;C1QA;S100A9;RNASE6;VSIG4;SLC11A1	C1QB;FCGR3;SLC11A1;CD55;S100A9;C1QC;C1QA;CD5L;VSIG4;CFP	RPS19;PTPRC;SLC11A1;CD83;BCL2	CD83;FCGR3;RNASE6;PTPRC;S100A9;BCL2
GOBP_CELLULAR_LIPID_CATABOLIC_PROCESS	4.993	7.026	2.578													11	13	7													PHYH;SLC27A2;ACAD11;ACACB;SCP2;LONP2;FABP1;ANGPTL3;APOA2;IDH1;APOB	IDH1;LONP2;ACACB;APOC3;SCP2;APOB;APOA2;PCK1;FABP1;APOA5;AADAC;ACAD11;APOC1	PHYH;ECHDC2;PCK1;AADAC;SCP2;ANGPTL3;FABP1
GOBP_SECONDARY_ALCOHOL_METABOLIC_PROCESS	8.743	6.946	2.028													13	11	5													CYP3A13;EPHX2;CYP27A1;HMGCS2;SULT2A7;CAT;ANGPTL3;ABCA1;APOA2;SOD1;MSMO1;IDH1;APOB	IDH1;ABCA1;CYP27A1;APOB;CYP2D10;FMO5;APOA2;CYP3A13;EPHX2;HMGCS2;APOA5	HMGCS2;CYP2D10;CAT;EPHX2;ANGPTL3
GOBP_REGULATION_OF_SMALL_MOLECULE_METABOLIC_PROCESS	4.168	6.728	1.814													12	15	7													EPHX2;MLXIPL;ACACB;GNMT;LONP2;FABP1;BHMT;STAT3;PROX1;SOD1;H6PD;APOB	APOA5;LONP2;ACACB;APOC3;NNMT;APOB;PROX1;H6PD;FMO5;STAT3;EPHX2;FABP1;GNMT;BHMT;APOC1	MLXIPL;STAT3;GNMT;EPHX2;H6PD;BHMT;FABP1
GOBP_ALCOHOL_METABOLIC_PROCESS	7.986	6.678	2.289													17	15	8													CYP3A13;EPHX2;CYP27A1;HMGCS2;SULT2A7;MSMO1;ABCA1;CAT;ANGPTL3;QDPR;ADH4;APOA2;SOD1;ALDH1A7;IDH1;H6PD;APOB	IDH1;ABCA1;CYP27A1;APOB;CYP2D10;H6PD;ALDH2;FMO5;APOA2;CYP3A13;PCK1;EPHX2;HMGCS2;QDPR;APOA5	HMGCS2;CYP2D10;CAT;QDPR;PCK1;EPHX2;H6PD;ANGPTL3
GOBP_ACUTE_PHASE_RESPONSE	6.033	6.225														7	7														HP;SERPINA3N;SERPINA1E;HAMP;SAA4;ORM2;CRP	ORM2;HP;CRP;HAMP;SERPINA3N;SAA4;SERPINA1E
GOBP_PHOSPHOLIPID_EFFLUX	1.736	6.173														2	5														APOA2;ABCA1	ABCA1;APOC3;APOA2;APOA5;APOC1
GOBP_PROTEIN_LIPID_COMPLEX_ASSEMBLY	2.125	5.959														3	6														APOA2;ABCA1;APOB	ABCA1;APOC3;APOB;APOA2;APOA5;APOC1
GOBP_CELLULAR_AMINO_ACID_CATABOLIC_PROCESS	3.722	5.852	10.331													7	9	12													OAT;AASS;TAT;HAAO;ACADSB;QDPR;ALDH6A1	AASS;HAAO;FTCD;ACADSB;QDPR;TAT;SDS;OAT;ABAT	AASS;TAT;TDO2;QDPR;HGD;FTCD;RIDA;CSAD;HAAO;ACADSB;ALDH6A1;ABAT
GOBP_B_CELL_MEDIATED_IMMUNITY	3.839	5.852	2.009					1.654	2.522							8	10	5					5	6							C6;SERPING1;HC;C8A;C8B;C4BP;C9;CRP	C8B;HPX;HC;SERPING1;C6;C8A;CRP;C9;CLU;C4BP	C6;C8A;C8B;C9;HC					FCGR3;C1QB;C1QC;FCER1G;C1QA	C1QB;FCGR3;CD55;C1QC;FCER1G;C1QA
GOBP_STEROL_METABOLIC_PROCESS	7.494	5.782	2.61													12	10	6													CYP3A13;EPHX2;HMGCS2;SULT2A7;CAT;ANGPTL3;ABCA1;APOA2;SOD1;MSMO1;CYP27A1;APOB	CYP27A1;ABCA1;APOB;CYP2D10;FMO5;APOA2;CYP3A13;EPHX2;HMGCS2;APOA5	HMGCS2;CYP2D10;CAT;EPHX2;CYP8B1;ANGPTL3
GOBP_ORGANIC_HYDROXY_COMPOUND_BIOSYNTHETIC_PROCESS	5.488	5.781	2.424													12	12	7													CYP3A13;HMGCS2;SLC27A2;BAAT;SCP2;QDPR;PROX1;SOD1;MSMO1;CYP27A1;H6PD;APOB	CYP27A1;APOB;SCP2;PROX1;H6PD;ALDH2;CYP3A13;PCK1;HMGCS2;QDPR;SLC27A5;APOA5	HMGCS2;QDPR;PCK1;SCP2;BAAT;H6PD;CYP8B1
GOBP_ALPHA_AMINO_ACID_METABOLIC_PROCESS	6.251	5.695	12.016													12	11	16													OAT;AASS;BAAT;TAT;GNMT;HAAO;GLYAT;ACADSB;QDPR;BHMT;ADI1;ALDH6A1	ASPG;AASS;HAAO;FTCD;ACADSB;QDPR;TAT;GNMT;BHMT;SDS;OAT	AASS;TAT;TDO2;BHMT;QDPR;HGD;FTCD;GLYAT;ASL;RIDA;CSAD;GNMT;BAAT;HAAO;ACADSB;ALDH6A1
GOBP_STEROL_TRANSPORT	2.023	5.516														5	9														SCP2;LRP6;ABCA1;APOA2;APOB	ABCA1;APOC3;APOB;SCP2;APOA2;CLU;LRP6;APOA5;APOC1
GOBP_MONOCARBOXYLIC_ACID_BIOSYNTHETIC_PROCESS	2.95	5.499	1.525													8	11	5													CYP3A13;MLXIPL;SLC27A2;ACACB;BAAT;SCP2;PROX1;CYP27A1	CYP27A1;ACACB;APOC3;SCP2;CYP2D10;PROX1;CYP3A13;SLC27A5;APOA5;SDS;APOC1	CYP2D10;MLXIPL;SCP2;BAAT;CYP8B1
GOBP_CELLULAR_AMINO_ACID_METABOLIC_PROCESS	5.931	5.429	11.402													13	12	17													OAT;AASS;BAAT;TAT;GNMT;HAAO;GLYAT;ACADSB;QDPR;BHMT;ADI1;ALDH1A7;ALDH6A1	ASPG;AASS;HAAO;FTCD;ACADSB;QDPR;TAT;GNMT;BHMT;SDS;OAT;ABAT	AASS;TAT;TDO2;BHMT;QDPR;HGD;FTCD;GLYAT;ASL;RIDA;CSAD;GNMT;BAAT;HAAO;ACADSB;ALDH6A1;ABAT
GOBP_STEROID_BIOSYNTHETIC_PROCESS	6.942	5.392	2.428													12	10	6													CYP3A13;HMGCS2;SLC27A2;BAAT;SCP2;SRD5A1;PROX1;SOD1;MSMO1;CYP27A1;H6PD;APOB	CYP27A1;SRD5A1;APOB;SCP2;PROX1;H6PD;CYP3A13;HMGCS2;SLC27A5;APOA5	HMGCS2;CYP8B1;SCP2;BAAT;H6PD;SRD5A1
GOBP_REGULATION_OF_CELLULAR_KETONE_METABOLIC_PROCESS	3.346	5.356	1.525													7	9	4													MLXIPL;ACACB;FABP1;LONP2;BHMT;PROX1;H6PD	APOA5;LONP2;ACACB;APOC3;PROX1;H6PD;FABP1;BHMT;APOC1	MLXIPL;H6PD;BHMT;FABP1
GOBP_REGULATION_OF_LIPID_LOCALIZATION	3.39	5.295	1.764													8	10	5													APOA2;ACACB;SCP2;ACSL1;PLIN2;ABCA1;CRP;APOB	ABCA1;ACACB;APOC3;PLIN2;SCP2;APOB;APOA2;CRP;APOA5;APOC1	CYP4A32;ACSL1;PLIN2;SCP2;CYP8B1
GOBP_TRIGLYCERIDE_METABOLIC_PROCESS	1.667	5.129	1.814													4	8	4													APOA2;ACSL1;CAT;APOB	APOC3;APOB;APOA2;PCK1;SLC27A5;APOA5;AADAC;APOC1	CAT;ACSL1;PCK1;AADAC
GOBP_CYTOLYSIS	4.897	5.109	5.297													5	5	5													C6;HC;C8B;C9;C8A	C8B;HC;C6;C8A;C9	C6;C8A;C8B;C9;HC
GOBP_REGULATION_OF_STEROID_METABOLIC_PROCESS	3.046	5.109														6	8														EPHX2;APOA2;PROX1;SOD1;H6PD;APOB	APOB;PROX1;H6PD;FMO5;APOA2;EPHX2;APOA5;APOC1
GOBP_ADAPTIVE_IMMUNE_RESPONSE_BASED_ON_SOMATIC_RECOMBINATION_OF_IMMUNE_RECEPTORS_BUILT_FROM_IMMUNOGLOBULIN_SUPERFAMILY_DOMAINS	2.788	5.092	1.584				2.368	4.375	4.203	1.526	1.346	2.049				9	12	6				7	12	11	6	5	6				C6;SERPING1;HC;C8A;C8B;C4BP;STAT3;CRP;C9	C8B;HPX;HC;SERPING1;C6;C8A;STAT3;CRP;C9;CLU;AZGP1;C4BP	C6;C8A;C8B;C9;STAT3;HC				CTSH;C1QA;C1QB;KLHL6;ANXA1;C1QC;NCKAP1L	ANXA1;NCKAP1L;KLHL6;STX7;FCGR3;C1QB;WAS;C1QC;FCER1G;C1QA;CTSH;SLC11A1	C1QB;FCGR3;WAS;SLC11A1;CD55;KLHL6;C1QC;FCER1G;NCKAP1L;C1QA;IL6RA	FCER1G;PTPRC;SLC11A1;TNFAIP3;SASH3;ANXA1	FCER1G;FCGR3;PRKCQ;PTPRC;SASH3	SLC11A1;PRKCQ;TNFAIP3;SASH3;PTPRC;FCER1G
GOBP_ACUTE_INFLAMMATORY_RESPONSE	5.725	4.974							1.694					1.492		9	8							4					5		HP;VNN1;SERPINA1E;SERPINA3N;HAMP;SAA4;ORM2;APOA2;CRP	APOA2;ORM2;HP;CRP;SERPINA3N;HAMP;SAA4;SERPINA1E							IL6RA;FCGR3;VCAM1;S100A8					EDNRB;PRCP;VCAM1;FCGR3;DNASE1L3
GOBP_POSITIVE_REGULATION_OF_IMMUNE_RESPONSE	2.415	4.95	2.48				3.829	13.458	13.119	6.977	9.032	9.823				11	15	10				12	28	26	18	19	19				C6;SERPING1;HC;HRG;C8A;MAVS;C8B;C4BP;FYB2;C9;CRP	C8B;HPX;HC;FYB2;SERPING1;HRG;C6;C8A;PCK1;CRP;C9;CFHR1;CLU;AZGP1;C4BP	C6;C8A;RIOK3;CFHR1;C8B;PCK1;C9;MAVS;FYB2;HC				PRKCB;ICOSL;C1QA;C1QB;LAPTM5;PTAFR;ANXA1;KLHL6;NFAM1;C1QC;TYROBP;NCKAP1L	PTAFR;CFP;STX7;FCGR3;FYB;PYCARD;SPI1;C1QC;C1QA;VSIG4;LAPTM5;KLHL6;CD5L;C1QB;IFI205;FCER1G;THEMIS2;ANXA1;NCKAP1L;HCK;ICOSL;SLC11A1;NFAM1;SYK;TYROBP;ITGB2;CD86;PRKCB	CD55;ICOSL;NCKAP1L;CD5L;HCK;C1QB;FCGR3;PYCARD;SYK;CFP;SLC11A1;FPR1;NFAM1;PRKCB;C1QC;FCER1G;ITGB2;THEMIS2;FYB;FGR;KLHL6;TYROBP;C1QA;VSIG4;LAPTM5;SPI1	PTPN22;RPS19;FCER1G;PTPRC;SLC11A1;TYROBP;PRKCH;SASH3;SYK;LAPTM5;ITGB2;KLRK1;FGR;ANXA1;LYN;PRKCB;FYN;BCL2	SYK;FCER1G;LCK;IFI205;FCGR3;PTPN22;RASGRP1;PRKCB;FYB;PRKCQ;LAPTM5;KLRK1;SASH3;FYN;PTPRC;PRKCH;GBP5;TYROBP;BCL2	SLC11A1;PRKCQ;FYB;SYK;PRKCH;LAPTM5;LCK;FPR1;ITGB2;KLRK1;PRKCB;FCER1G;HCK;FGR;SASH3;PTPN22;RASGRP1;TYROBP;PTPRC
GOBP_FIBRINOLYSIS	4.723	4.95														5	5														SERPING1;FGG;CPB2;HRG;FGB	HRG;FGB;SERPING1;CPB2;FGG
GOBP_CELLULAR_KETONE_METABOLIC_PROCESS	3.743	4.818	2.778													9	10	7													MLXIPL;ACACB;FABP1;LONP2;SRD5A1;BHMT;ADH4;PROX1;H6PD	APOA5;LONP2;ACACB;APOC3;SRD5A1;PROX1;H6PD;FABP1;BHMT;APOC1	CYP4A32;TDO2;MLXIPL;H6PD;SRD5A1;BHMT;FABP1
GOBP_PROTEIN_LIPID_COMPLEX_SUBUNIT_ORGANIZATION	1.686	4.818														3	6														APOA2;ABCA1;APOB	ABCA1;APOC3;APOB;APOA2;APOA5;APOC1
GOBP_FATTY_ACID_METABOLIC_PROCESS	5.793	4.719	6.218													15	13	14													PHYH;CYP3A13;MLXIPL;SLC27A2;ACAD11;ACACB;BAAT;SCP2;LONP2;FABP1;ACSL1;ACADSB;ANGPTL3;ADH4;MSMO1	LONP2;ACACB;APOC3;SCP2;CYP2D10;CYP3A13;PCK1;FABP1;ACADSB;SLC27A5;APOA5;ACAD11;APOC1	CYP4A32;ACSL1;PHYH;CYP2D10;ECHDC2;EPHX1;PCK1;MLXIPL;CRYL1;SCP2;BAAT;ACADSB;ANGPTL3;FABP1
GOBP_LIPID_LOCALIZATION	3.701	4.634	2.192													13	14	9													APOA2;SLC27A2;ACACB;SCP2;LRP6;FABP1;ACSL1;SLCO1B2;PLIN2;ANGPTL3;ABCA1;CRP;APOB	ABCA1;ACACB;APOC3;PLIN2;SCP2;APOB;APOA2;FABP1;CRP;CLU;SLC27A5;LRP6;APOA5;APOC1	CYP4A32;ACSL1;LRP6;ABCC3;PLIN2;SCP2;CYP8B1;ANGPTL3;FABP1
GOBP_NEGATIVE_REGULATION_OF_COAGULATION	3.346	4.634		1.35		1.386									2.624	5	6		2		2									5	SERPING1;FGG;CPB2;HRG;FGB	HRG;FGB;SERPING1;CPB2;FGG;ABAT		THBS1;PRKG1		SERPINE1;C1QTNF1									PDGFB;SERPINE1;NOS3;C1QTNF1;TFPI
GOBP_ADAPTIVE_IMMUNE_RESPONSE	2.609	4.629					3.527	6.877	6.31	3.448	2.904	3.308				11	14					11	19	17	12	10	10				C6;SERPING1;HC;FGL1;C8A;C8B;C4BP;STAT3;CRP;C9;FGB	C8B;HPX;SERPING1;HC;FGB;FGL1;C6;C8A;STAT3;CRP;C9;CLU;AZGP1;C4BP					PRKCB;CTSH;ICOSL;C1QA;C1QB;LAIR1;KLHL6;ANXA1;CD84;C1QC;NCKAP1L	STX7;FCGR3;PYCARD;C1QC;C1QA;KLHL6;C1QB;FCER1G;CTSH;ANXA1;NCKAP1L;LAIR1;ICOSL;CD84;SLC11A1;WAS;SYK;CD86;PRKCB	C1QB;FCGR3;WAS;SLC11A1;CD55;PRKCB;KLHL6;C1QC;FCER1G;ICOSL;PYCARD;NCKAP1L;C1QA;SYK;IL6RA;LAIR1;CD84	FCER1G;PTPRC;SLC11A1;TNFAIP3;SASH3;SYK;KLRK1;LYN;ANXA1;PRKCB;FYN;CD48	CD48;PRKCB;SYK;FCER1G;FCGR3;FYN;PRKCQ;PTPRC;KLRK1;SASH3	SLC11A1;PRKCQ;TNFAIP3;SYK;SASH3;PTPRC;KLRK1;PRKCB;CD48;FCER1G
GOBP_RESPONSE_TO_XENOBIOTIC_STIMULUS	3.657	4.625	4.558				2.308									12	13	12				8									CYP3A13;CPB2;HMGCS2;SULT2A7;ACACB;CAT;GLYAT;ACSL1;SRD5A1;PLIN2;APOA2;SOD1	ACACB;PLIN2;SRD5A1;NNMT;CYP2D10;FMO5;APOA2;CPB2;CYP3A13;HMGCS2;CMBL;AADAC;ABAT	CYP4A32;HMGCS2;ACSL1;CYP2D10;CAT;EPHX1;PLIN2;SRD5A1;AOX1;GLYAT;AADAC;ABAT				THBS1;DUSP6;CYBB;NCKAP1L;CYBA;CYP2A4;CXCR4;HMOX1
GOBP_LYMPHOCYTE_MEDIATED_IMMUNITY	2.358	4.579					1.468	3.903	3.068		3.051	2.15				8	11					5	11	9		8	6				C6;SERPING1;HC;C8A;C8B;C4BP;C9;CRP	C8B;HPX;HC;SERPING1;C6;C8A;CRP;C9;CLU;AZGP1;C4BP					CTSH;C1QA;C1QB;C1QC;NCKAP1L	NCKAP1L;GZMB;STX7;FCGR3;C1QB;WAS;ARRB2;C1QC;FCER1G;C1QA;CTSH	C1QB;FCGR3;WAS;CD55;C1QC;FCER1G;ARRB2;NCKAP1L;C1QA		RASGRP1;CORO1A;FCER1G;FCGR3;PTPRC;GZMB;KLRK1;SASH3	RASGRP1;SASH3;CORO1A;PTPRC;KLRK1;FCER1G
GOBP_LIPID_MODIFICATION	5.018	4.551	2.015													11	10	6													PHYH;CYP3A13;EPHX2;SLC27A2;ACAD11;ACACB;SCP2;LONP2;FABP1;ADH4;APOA2	LONP2;ACACB;SCP2;APOA2;CYP3A13;EPHX2;FABP1;APOA5;ACAD11;APOC1	CYP4A32;PHYH;ECHDC2;EPHX2;SCP2;FABP1
GOBP_ORGANIC_HYDROXY_COMPOUND_TRANSPORT	1.443	4.516														6	11														SCP2;LRP6;SLCO1B2;ABCA1;APOA2;APOB	ABCA1;APOC3;APOB;SCP2;APOA2;ABAT;CLU;SLC27A5;LRP6;APOA5;APOC1
GOBP_ORGANONITROGEN_COMPOUND_CATABOLIC_PROCESS	1.632	4.496	2.019													17	24	16													OAT;CYP3A13;ALDH1L1;AMBP;HAMP;AASS;PTPN3;TAT;HAAO;LONP2;ACADSB;SLCO1B2;C4BP;QDPR;BHMT;ALDH6A1;APOB	APOB;CYP3A13;ACADSB;FBXO31;UBR4;SDS;OAT;CYP2D10;HAAO;ALDH7A1;QDPR;HAMP;CLU;PTPN3;ABAT;AMBP;AASS;TAT;BHMT;C4BP;APOC1;LONP2;FTCD;ALDH1L1	AASS;TAT;TDO2;CYP2D10;BHMT;QDPR;IDS;HGD;FTCD;RIDA;CSAD;ALDH7A1;HAAO;ACADSB;ALDH6A1;ABAT
GOBP_COMPLEMENT_ACTIVATION_ALTERNATIVE_PATHWAY	4.244	4.48	4.558					1.711	1.832							4	4	4					2	2							C8A;C8B;HC;C9	C9;HC;C8B;C8A	C8A;C8B;HC;C9					CFP;VSIG4	VSIG4;CFP
GOBP_LIPID_BIOSYNTHETIC_PROCESS	4.058	4.48	1.643													17	17	10													CYP3A13;MLXIPL;CYP27A1;HMGCS2;SLC27A2;ACACB;BAAT;SCP2;ACSL1;SRD5A1;APOA2;PROX1;SOD1;MSMO1;IDH1;H6PD;APOB	IDH1;CYP27A1;ACACB;APOC3;SRD5A1;SCP2;CYP2D10;PROX1;APOB;H6PD;APOA2;CYP3A13;PCK1;HMGCS2;SLC27A5;APOA5;APOC1	HMGCS2;ACSL1;CYP2D10;PCK1;MLXIPL;SRD5A1;SCP2;BAAT;H6PD;CYP8B1
GOBP_NEUTRAL_LIPID_METABOLIC_PROCESS	1.414	4.455	1.517													4	8	4													APOA2;ACSL1;CAT;APOB	APOC3;APOB;APOA2;PCK1;SLC27A5;APOA5;AADAC;APOC1	CAT;ACSL1;PCK1;AADAC
GOBP_ALPHA_AMINO_ACID_CATABOLIC_PROCESS	4.14	4.436	8.413													7	7	10													OAT;AASS;TAT;HAAO;ACADSB;QDPR;ALDH6A1	AASS;HAAO;ACADSB;QDPR;TAT;SDS;OAT	AASS;TAT;TDO2;QDPR;HGD;RIDA;CSAD;HAAO;ACADSB;ALDH6A1
GOBP_PROTEIN_CONTAINING_COMPLEX_REMODELING		4.436															5															APOC3;APOB;APOA2;APOA5;APOC1
GOBP_CHOLESTEROL_EFFLUX	1.539	4.399														3	6														APOA2;ABCA1;APOB	ABCA1;APOC3;APOB;APOA2;APOA5;APOC1
GOBP_NEGATIVE_REGULATION_OF_LIPASE_ACTIVITY	2.779	4.386	1.672													3	4	2													APOA2;ANGPTL3;ANGPTL4	APOA2;APOC3;APOC1;ANGPTL4	ANGPTL3;ANGPTL4
GOBP_GENERATION_OF_PRECURSOR_METABOLITES_AND_ENERGY	4.593	4.384	2.48													15	14	10													CYB5A;ALDH1L1;MLXIPL;HMGCS2;IDH1;HAAO;CAT;GNMT;STAT3;SRD5A1;QDPR;ADH4;STEAP4;LYRM7;H6PD	IDH1;STEAP4;LYRM7;SRD5A1;HAAO;H6PD;ALDH2;STAT3;HMGCS2;QDPR;GNMT;SLC27A5;ALDH1L1;ATP5J	HMGCS2;CAT;QDPR;MLXIPL;STAT3;GNMT;HAAO;SRD5A1;LYRM7;H6PD
GOBP_DICARBOXYLIC_ACID_METABOLIC_PROCESS	3.188	4.369	2.602													6	7	5													PHYH;OAT;ALDH1L1;TAT;HAAO;IDH1	IDH1;HAAO;FTCD;PCK1;TAT;ALDH1L1;OAT	TAT;PHYH;PCK1;FTCD;HAAO
GOBP_CELLULAR_LIPID_METABOLIC_PROCESS	5.41	4.333	4.686													23	20	19													MLXIPL;BAAT;SCP2;SRD5A1;ALDH1A7;PHYH;EPHX2;ADH4;CYP3A13;ACACB;CAT;APOA2;MSMO1;APOB;HMGCS2;SLC27A2;ACAD11;LONP2;FABP1;ACSL1;ACADSB;ANGPTL3;IDH1	ACACB;APOC3;APOB;APOA2;CYP3A13;HMGCS2;FABP1;ACADSB;SLC27A5;IDH1;SRD5A1;CYP2D10;PCK1;EPHX2;SCP2;AADAC;ACAD11;APOC1;LONP2;APOA5	CYP2D10;MLXIPL;HMGCS2;PHYH;CAT;EPHX2;SRD5A1;ECHDC2;PCK1;CRYL1;SCP2;BAAT;ANGPTL3;CYP4A32;ACSL1;EPHX1;ACADSB;AADAC;FABP1
GOBP_IMMUNE_EFFECTOR_PROCESS	2.023	4.329	1.697				3.863	11.922	10.789	7.429	5.065	7.98				11	15	9				13	28	25	20	15	18				C6;SERPING1;HC;C8A;MAVS;STAT3;C8B;C4BP;APOA2;CRP;C9	C8B;HPX;HC;SERPING1;APOA2;C6;C8A;STAT3;PCK1;CRP;C9;CFHR1;CLU;AZGP1;C4BP	C6;C8A;CFHR1;C8B;PCK1;C9;STAT3;MAVS;HC				CTSH;C1QA;C1QB;C1QC;FGL2;LAPTM5;PTAFR;ANXA1;CD84;NCKAP1L;TYROBP;IRF8;HMOX1	PTAFR;CFP;STX7;FCGR3;FGL2;PYCARD;SPI1;C1QC;C1QA;VSIG4;IRF8;LAPTM5;GZMB;CD5L;C1QB;ARRB2;FCER1G;CTSH;ANXA1;NCKAP1L;HCK;CD84;SLC11A1;WAS;SYK;TYROBP;ITGB2;CD86	WAS;CD55;ARRB2;NCKAP1L;CD5L;HCK;C1QB;FCGR3;PYCARD;SYK;CFP;SLC11A1;C1QC;FCER1G;IRF8;IL6RA;ITGB2;FGR;TYROBP;C1QA;FGL2;VSIG4;LAPTM5;CD84;SPI1	ITGAL;LAPTM5;FGR;PTPN22;TYROBP;RAC2;FGL2;ANXA1;CORO1A;SASH3;SYK;NCF1;KLRK1;LYN;FYN;RPS19;FCER1G;PTPRC;SLC11A1;ITGB2	KIT;RASGRP1;CORO1A;SYK;FCER1G;TYROBP;FCGR3;FYN;PTPN22;PTPRC;LAPTM5;GZMB;KLRK1;FGL2;SASH3	FGR;HCK;SLC11A1;ITGAL;RAC2;PTPN22;SYK;RASGRP1;KIT;CORO1A;FGL2;TYROBP;ITGB2;SASH3;LAPTM5;PTPRC;KLRK1;FCER1G
GOBP_ALCOHOL_BIOSYNTHETIC_PROCESS	3.997	4.32	1.467													8	8	4													CYP3A13;HMGCS2;QDPR;SOD1;MSMO1;CYP27A1;H6PD;APOB	CYP27A1;APOB;H6PD;PCK1;CYP3A13;HMGCS2;QDPR;APOA5	H6PD;HMGCS2;QDPR;PCK1
GOBP_ACTIVATION_OF_IMMUNE_RESPONSE	3.298	4.308	2.569				4.109	11.436	14.705	5.738	8.429	8.062				10	11	8				10	21	23	13	15	14				C6;SERPING1;HC;C8A;MAVS;C8B;C4BP;FYB2;C9;CRP	C8B;SERPING1;HC;FYB2;C6;C8A;CRP;C9;CFHR1;CLU;C4BP	C6;C8A;CFHR1;C8B;C9;MAVS;FYB2;HC				PRKCB;ICOSL;C1QA;C1QB;TYROBP;LAPTM5;KLHL6;NFAM1;C1QC;NCKAP1L	CFP;FCGR3;FYB;PYCARD;C1QC;C1QA;VSIG4;LAPTM5;KLHL6;CD5L;C1QB;IFI205;FCER1G;THEMIS2;NCKAP1L;HCK;ICOSL;NFAM1;SYK;TYROBP;PRKCB	CD55;ICOSL;NCKAP1L;CD5L;HCK;C1QB;FCGR3;PYCARD;SYK;CFP;FPR1;NFAM1;PRKCB;C1QC;FCER1G;THEMIS2;FYB;FGR;KLHL6;TYROBP;C1QA;VSIG4;LAPTM5	PTPN22;FCER1G;PTPRC;TYROBP;PRKCH;SYK;LAPTM5;KLRK1;FGR;LYN;PRKCB;FYN;BCL2	PRKCB;FYB;SYK;LCK;IFI205;FCGR3;FCER1G;TYROBP;FYN;PTPN22;PTPRC;LAPTM5;PRKCH;KLRK1;BCL2	HCK;PTPN22;FPR1;FGR;FYB;SYK;PRKCH;TYROBP;LAPTM5;PTPRC;LCK;KLRK1;PRKCB;FCER1G
GOBP_POSITIVE_REGULATION_OF_IMMUNE_SYSTEM_PROCESS	2.495	4.308	2.028				6.333	15.75	16.331	8.278	10.91	12.762				15	18	12				20	38	36	25	26	27				C6;SERPING1;VNN1;CAMK1D;HC;ID2;HRG;HAMP;C8A;MAVS;C8B;C4BP;FYB2;C9;CRP	C8B;HPX;HC;FYB2;SERPING1;HRG;C6;C8A;CAMK1D;PCK1;CRP;C9;CFHR1;ID2;HAMP;CLU;AZGP1;C4BP	C6;C8A;RIOK3;CFHR1;C8B;ID2;PCK1;C9;MAVS;FYB2;CAMK1D;HC				TYROBP;ANXA1;CD84;VCAM1;HCLS1;PRKCB;CD83;C1QA;PTAFR;THBS1;AXL;NCKAP1L;HMOX1;ICOSL;C1QB;LAPTM5;KLHL6;NFAM1;C1QC;VSIR	PTAFR;VSIR;CFP;STX7;FCGR3;CSF1R;FYB;PYCARD;SPI1;C1QC;C1QA;VSIG4;MAP3K8;LAPTM5;KLHL6;CD5L;C1QB;IFI205;FCER1G;AIF1;LRRK2;THEMIS2;AXL;ANXA1;NCKAP1L;CD83;HCK;ICOSL;VCAM1;CD84;SLC11A1;LGMN;NFAM1;SYK;TYROBP;ITGB2;CD86;PRKCB	VCAM1;CD55;AXL;ICOSL;NCKAP1L;CD5L;HCK;C1QB;FCGR3;AIF1;PYCARD;LRRK2;SYK;CFP;SLC11A1;FPR1;NFAM1;PRKCB;LGMN;HCLS1;FCER1G;C1QC;IL6RA;ITGB2;THEMIS2;FYB;FGR;KLHL6;CSF1R;TYROBP;C1QA;VSIG4;LAPTM5;VSIR;CD84;SPI1	LAPTM5;FGR;PTPN22;AIF1;BCL2;CSF1R;TYROBP;RAC2;ANXA1;CD83;CORO1A;PRKCH;SASH3;SYK;HCLS1;KLRK1;LYN;FYN;RPS19;FCER1G;PTPRC;SLC11A1;SH3KBP1;ITGB2;PRKCB	KIT;CD83;SYK;FCER1G;LCK;IFI205;FCGR3;PTPN22;AIF1;TOX;RASGRP1;PRKCB;CORO1A;FYB;PRKCQ;LAPTM5;KLRK1;SASH3;SH3KBP1;FYN;PTPRC;PRKCH;GBP5;TYROBP;BCL2;CSF1R	SLC11A1;PRKCQ;FYB;SYK;PRKCH;CSF1R;SH3KBP1;LAPTM5;LCK;AIF1;FPR1;RAC2;ITGB2;CORO1A;KLRK1;PRKCB;HCLS1;FCER1G;HCK;FGR;KIT;SASH3;TOX;PTPN22;RASGRP1;TYROBP;PTPRC
GOBP_HEPATICOBILIARY_SYSTEM_DEVELOPMENT	4.817	4.292	1.455													9	8	4													CPB2;FGL1;ONECUT2;HMGCS2;HAMP;BAAT;PTPN3;SRD5A1;PROX1	FGL1;SRD5A1;PROX1;PCK1;CPB2;HMGCS2;HAMP;PTPN3	BAAT;SRD5A1;HMGCS2;PCK1
GOBP_NEGATIVE_REGULATION_OF_MOLECULAR_FUNCTION	3.346	4.274	1.601							1.845			2.511	1.595	1.474	20	21	13							15			15	22	20	NLRP12;SERPING1;SERPINA3N;SERPINA1E;AMBP;ANGPTL4;CHORDC1;HC;HRG;ACACB;LRP6;CAT;APOA2;PROX1;HP;ID2;ERRFI1;FABP1;ANGPTL3;DNAJA1	ERRFI1;CHORDC1;ACACB;APOC3;APOA2;FABP1;HRG;CYP2D10;PROX1;HP;SERPINA3N;SERPINA1E;SERPING1;AMBP;CFHR1;ID2;APOC1;HC;ANGPTL4;NLRP12;LRP6	SERPINA1E;NLRP12;LRP6;CAT;CYP2D10;DNAJA1;CFHR1;ANGPTL4;ID2;CHORDC1;HC;ANGPTL3;FABP1							PTPN22;CD44;PTPRC;NFKB1;TMC8;TNFAIP3;TNFAIP8;PIP4K2A;KLRK1;LYN;ANXA1;GADD45B;FLNA;KLF4;SEMA4D			PTGIS;SERPINH1;SPRY1;PALM;BMP4;NES;ANXA2;ZFP462;ADAM15;KLF4;TIMP2;ANXA1;FKBP1A;APP;PDGFB	ADAM15;ANXA2;PDGFB;RASIP1;BMP4;KLF4;APP;CSNK1E;SPRY4;TFPI;DAB2;HECW2;TIMP2;CAV1;EDNRB;PTGIS;SERPINH1;MAPK7;NES;PHACTR2;ZFP462;PALM	ECM1;PTGIS;RASIP1;HEG1;ADAM15;ANXA2;MAPK7;PDGFB;SOX7;CSNK1E;AQP1;WWTR1;SERPINE1;NOS3;GNAI2;DAB2;PTPRB;PHACTR2;TFPI;KLF4
GOBP_DEFENSE_RESPONSE	3.306	4.234					6.982	19.06	20.483	13.939	15.086	16.076			2.072	24	25					28	54	52	43	40	39			28	NLRP12;SERPING1;SERPINA3N;SERPINA1E;MAVS;SOD1;FGB;CAMK1D;C4BP;ORM2;C9;C8A;C6;IL1RAP;HC;HRG;C8B;APOA2;HP;VNN1;HAMP;SAA4;STAT3;CRP	APOA2;C8A;STAT3;HRG;HPX;ORM2;HP;IL1RAP;CAMK1D;CRP;SERPINA3N;HAMP;CLU;SAA4;SERPINA1E;SERPING1;C9;CFHR1;KPNA6;C4BP;C8B;FGB;HC;C6;NLRP12					IL1RN;CYBA;VIM;TYROBP;ANXA1;TLR2;VCAM1;CD84;IRF8;CD83;C1QA;CYBB;COTL1;FGL2;NCF2;PTAFR;IFNGR1;HMOX1;AXL;THBS1;KLF4;PLD4;ICOSL;C1QB;LAPTM5;NFAM1;C1QC;CXCR4	PTAFR;CFP;KLF4;FCGR3;FGL2;CSF1R;PYCARD;SPI1;SLA;C1QC;C1QA;CD44;VSIG4;IRF8;LAPTM5;GZMB;CD5L;C1QB;ARRB2;IFI205;FCER1G;AIF1;LIPA;COTL1;LRRK2;THEMIS2;AXL;ANXA1;IFNGR1;FOLR2;KDM6B;CD83;CYBA;PLD4;HCK;S100A9;RNASE6;NCF2;ICOSL;VCAM1;CD84;SLC11A1;S100A8;VIM;NFAM1;MRC1;CYBB;WAS;SAMHD1;LY86;TYROBP;SYK;METRNL;ITGB2	WAS;VCAM1;CD55;VIM;S100A9;MRC1;AXL;ICOSL;ARRB2;IFNGR1;CD5L;HCK;C1QB;FCGR3;AIF1;PYCARD;LRRK2;SYK;CYBA;CFP;KDM6B;FPR1;S100A8;SLC11A1;NFAM1;TLR2;C1QC;FCER1G;SLA;IRF8;FOLR2;IL6RA;SLC15A3;ITGB2;REL;THEMIS2;NCF2;LY86;CYBB;MARCO;FGR;COTL1;PLD4;CSF1R;TYROBP;C1QA;FGL2;VSIG4;LAPTM5;KLF4;CD84;SPI1	ITGAL;ETS1;TLR2;AOAH;NFKB1;CYBB;LAPTM5;ALOX5AP;FGR;CXCR4;PTPN22;AIF1;BCL2;CD44;CSF1R;TYROBP;TNFAIP3;FGL2;ANXA1;CD83;CD48;VIM;SLA;CORO1A;SYK;ATM;ADGRE5;NCF1;KLRK1;LYN;PTGER2;CCR5;FYN;AKNA;NCF2;RPS19;FCER1G;PTPRC;SLC11A1;COTL1;PBXIP1;ITGB2;KLF4	ETS1;KIT;CD83;SYK;LCK;FCER1G;IFI205;FCGR3;PTPN22;S100A8;CCR5;AIF1;GZMB;RASGRP1;SAMHD1;CYBB;AKNA;CORO1A;PRKCQ;LAPTM5;AOAH;KLRK1;CD48;PBXIP1;KLF4;RNASE6;FYN;PTPRC;S100A9;GBP5;TYROBP;BCL2;CSF1R;COTL1;VIM;NCF2;ADGRE5;ATM;CD44;FGL2	SLC11A1;PRKCQ;S100A9;PBXIP1;SYK;COTL1;CSF1R;LAPTM5;LCK;AOAH;AIF1;SLA;FPR1;FGL2;CORO1A;ITGB2;KLF4;KLRK1;FCER1G;HCK;ALOX5AP;FGR;KIT;PTGER2;CCR5;PTPN22;ATM;ITGAL;TNFAIP3;VIM;RASGRP1;TYROBP;CYBB;TLR2;PTPRC;S100A8;AKNA;NCF2;CD48			CALCRL;ECM1;PLAC8;PTGIS;DNASE1L3;ADAM15;MYO1C;MRC1;MEF2C;STAB1;MAPK7;SELP;IL33;PRCP;AQP1;SEC14L1;SERPINE1;VCAM1;PTGS1;CD55;KDM6B;VIM;TLR4;CDH5;FCGR3;CFP;STAB2;KLF4
GOBP_REGULATION_OF_IMMUNE_SYSTEM_PROCESS	2.849	4.151					7.311	15.348	16.331	10.562	11.667	14.391			1.517	21	23					27	46	44	35	33	35			23	SERPING1;FGL1;MAVS;FYB2;SOD1;CAMK1D;AMBP;C4BP;ORM2;C9;C8A;C6;HC;HRG;C8B;APOA2;VNN1;ID2;HAMP;STAT3;CRP	APOA2;C8A;STAT3;AZGP1;HRG;HPX;ORM2;PCK1;CAMK1D;CRP;HAMP;CLU;FGL1;FYB2;SERPING1;AMBP;C9;CFHR1;ID2;C4BP;C8B;HC;C6					FKBP1A;CYBA;TYROBP;CTSH;ANXA1;TLR2;VCAM1;CD84;HCLS1;MPP1;PRKCB;CD83;C1QA;FGL2;PTAFR;THBS1;AXL;NCKAP1L;HMOX1;ICOSL;C1QB;LAPTM5;LST1;KLHL6;NFAM1;C1QC;VSIR	PTAFR;VSIR;CFP;STX7;FCGR3;FGL2;CSF1R;FYB;PYCARD;SPI1;C1QC;C1QA;VSIG4;MERTK;MAP3K8;LAPTM5;KLHL6;CD5L;C1QB;ARRB2;IFI205;FCER1G;AIF1;LRRK2;THEMIS2;CTSH;AXL;ANXA1;NCKAP1L;CD83;CYBA;HCK;ICOSL;VCAM1;CD84;SLC11A1;LGMN;NFAM1;SAMHD1;WAS;SYK;TYROBP;ITGB2;MPP1;CD86;PRKCB	WAS;VCAM1;CD55;AXL;ICOSL;ARRB2;NCKAP1L;CD5L;HCK;C1QB;FCGR3;AIF1;PYCARD;LRRK2;SYK;CYBA;CFP;SLC11A1;FPR1;NFAM1;PRKCB;TLR2;LGMN;HCLS1;FCER1G;C1QC;IL6RA;SLC15A3;ITGB2;THEMIS2;FYB;FGR;KLHL6;CSF1R;TYROBP;C1QA;FGL2;LST1;LAPTM5;MERTK;VSIG4;VSIR;CD84;SPI1	TLR2;ETS1;LAPTM5;FGR;PTPN22;AIF1;BCL2;CSF1R;TCF7;TYROBP;TNFAIP3;RAC2;STK10;FGL2;ANXA1;CD83;CD48;LST1;CORO1A;PRKCH;SASH3;SYK;ATM;HCLS1;NCF1;KLRK1;LYN;FYN;RPS19;FCER1G;PTPRC;SLC11A1;SH3KBP1;ITGB2;PRKCB	ETS1;KIT;CD83;SYK;LCK;FCER1G;IFI205;FCGR3;PTPN22;AIF1;TOX;RASGRP1;SAMHD1;PRKCB;CORO1A;FYB;PRKCQ;LAPTM5;KLRK1;SASH3;CD48;SH3KBP1;FYN;PTPRC;PRKCH;GBP5;TYROBP;BCL2;CSF1R;TCF7;STK10;ATM;FGL2	SLC11A1;PRKCQ;FYB;SYK;PRKCH;CSF1R;SH3KBP1;LAPTM5;LCK;TCF7;STK10;AIF1;FPR1;RAC2;FGL2;CORO1A;ITGB2;KLRK1;PRKCB;HCLS1;FCER1G;LST1;HCK;FGR;KIT;SASH3;TOX;PTPN22;ATM;TNFAIP3;RASGRP1;TYROBP;TLR2;PTPRC;CD48			PLVAP;ECM1;CLEC4G;DNASE1L3;MEF2C;COL3A1;SELP;DLL1;IL33;CD320;SEC14L1;TCIM;LGMN;SERPINE1;ICAM1;VCAM1;ADGRF5;CD55;TAL1;TLR4;FCGR3;CFP;JAM2
GOBP_REGULATION_OF_LIPOPROTEIN_LIPASE_ACTIVITY	1.572	4.129	1.562													2	4	2													ANGPTL3;ANGPTL4	APOA5;APOC3;APOC1;ANGPTL4	ANGPTL3;ANGPTL4
GOBP_REVERSE_CHOLESTEROL_TRANSPORT	1.572	4.129														2	4														APOA2;ABCA1	ABCA1;APOC3;CLU;APOA2
GOBP_GLYCEROLIPID_CATABOLIC_PROCESS		4.128															6															APOC3;APOB;APOA2;APOA5;AADAC;APOC1
GOBP_NEGATIVE_REGULATION_OF_LIPOPROTEIN_LIPASE_ACTIVITY	2.216	4.114	2.285													2	3	2													ANGPTL3;ANGPTL4	APOC3;APOC1;ANGPTL4	ANGPTL3;ANGPTL4
GOBP_REGULATION_OF_VERY_LOW_DENSITY_LIPOPROTEIN_PARTICLE_REMODELING		4.114															3															APOA5;APOA2;APOC3
GOBP_REGULATION_OF_STEROL_TRANSPORT	1.409	4.108														3	6														APOA2;SCP2;ABCA1	ABCA1;APOC3;SCP2;APOA2;APOA5;APOC1
GOBP_NEUTRAL_LIPID_CATABOLIC_PROCESS		4.07															5															APOC3;APOB;APOA2;APOA5;AADAC
GOBP_REGULATION_OF_COAGULATION	2.812	4.046												1.421	2.116	5	6												4	5	SERPING1;FGG;CPB2;HRG;FGB	HRG;FGB;SERPING1;CPB2;FGG;ABAT												PDGFB;CAV1;CD34;TFPI	PDGFB;SERPINE1;NOS3;C1QTNF1;TFPI
GOBP_REGULATION_OF_IMMUNE_RESPONSE	1.913	4.018	1.434				6.588	14.869	15.163	7.942	8.925	11.429				13	17	10				20	36	34	24	23	25				C6;SERPING1;HC;FGL1;HRG;AMBP;C8A;MAVS;C8B;C4BP;FYB2;C9;CRP	C8B;HPX;HC;FYB2;SERPING1;AMBP;FGL1;HRG;C6;C8A;PCK1;CRP;C9;CFHR1;CLU;AZGP1;C4BP	C6;C8A;RIOK3;CFHR1;C8B;PCK1;C9;MAVS;FYB2;HC				FKBP1A;CYBA;TYROBP;CTSH;ANXA1;TLR2;CD84;PRKCB;C1QA;FGL2;PTAFR;NCKAP1L;HMOX1;ICOSL;C1QB;LAPTM5;KLHL6;NFAM1;C1QC;VSIR	PTAFR;VSIR;CFP;STX7;FCGR3;FGL2;FYB;PYCARD;SPI1;C1QC;C1QA;VSIG4;LAPTM5;KLHL6;CD5L;C1QB;ARRB2;IFI205;FCER1G;THEMIS2;CTSH;ANXA1;NCKAP1L;CYBA;HCK;ICOSL;CD84;SLC11A1;NFAM1;SAMHD1;WAS;SYK;TYROBP;ITGB2;CD86;PRKCB	WAS;CD55;ICOSL;ARRB2;NCKAP1L;CD5L;HCK;C1QB;FCGR3;PYCARD;SYK;CYBA;CFP;SLC11A1;FPR1;NFAM1;PRKCB;TLR2;C1QC;FCER1G;SLC15A3;ITGB2;THEMIS2;FYB;FGR;KLHL6;TYROBP;C1QA;FGL2;VSIG4;LAPTM5;VSIR;CD84;SPI1	TLR2;LAPTM5;FGR;PTPN22;BCL2;TYROBP;TNFAIP3;RAC2;FGL2;ANXA1;CD48;PRKCH;SASH3;SYK;NCF1;KLRK1;LYN;FYN;RPS19;FCER1G;PTPRC;SLC11A1;ITGB2;PRKCB	KIT;SYK;FCER1G;LCK;IFI205;FCGR3;PTPN22;RASGRP1;SAMHD1;PRKCB;FYB;PRKCQ;LAPTM5;KLRK1;SASH3;CD48;FYN;PTPRC;PRKCH;GBP5;TYROBP;BCL2;FGL2	SLC11A1;PRKCQ;FYB;SYK;PRKCH;LAPTM5;LCK;FPR1;RAC2;FGL2;ITGB2;KLRK1;PRKCB;FCER1G;HCK;FGR;KIT;SASH3;PTPN22;TNFAIP3;RASGRP1;TYROBP;TLR2;PTPRC;CD48
GOBP_NEGATIVE_REGULATION_OF_WOUND_HEALING	2.788	4.018												1.411	2.098	5	6												4	5	SERPING1;FGG;CPB2;HRG;FGB	HRG;FGB;SERPING1;CPB2;FGG;ABAT												PDGFB;CD34;TFPI;MMRN1	PDGFB;SERPINE1;NOS3;C1QTNF1;TFPI
GOBP_POSITIVE_REGULATION_OF_MULTICELLULAR_ORGANISMAL_PROCESS	3.407	3.951	1.697			1.611	6.588	7.594	7.455	5.57	6.047	6.389	2.242	2.42	4.376	24	24	16			11	27	36	33	28	26	25	17	31	35	NLRP12;AR;MAVS;ABCA1;SOD1;FGB;ORM2;LRG1;ANGPTL4;IL1RAP;GHR;FGG;HC;HRG;ACACB;APOA2;PROX1;VNN1;CPB2;ID2;HAMP;ACSL1;ANGPTL3;STAT3	ABCA1;ACACB;APOA2;STAT3;FBXO31;LRG1;HRG;FST;PROX1;ORM2;CPB2;PCK1;IL1RAP;HAMP;CLU;ABAT;ID2;KPNA6;FGG;FGB;HC;ANGPTL4;NLRP12;APOA5	ACSL1;RIOK3;NLRP12;FST;ERBB3;ANGPTL4;ID2;PCK1;STAT3;IL1RAP;MAVS;CYP8B1;GHR;HC;ANGPTL3;ABAT			C1QTNF1;RGS4;ENG;THBS2;SERPINE1;LUM;TBX2;CCBE1;KLF4;COL1A1;TPM1	TBXAS1;CYBA;TYROBP;CTSH;ANXA1;TLR2;GLIPR2;CD84;HCLS1;IRF8;PRKCB;CD83;CYBB;PKM;PTAFR;GNAI2;IFNGR1;NCKAP1L;HMOX1;AXL;THBS1;KLF4;BASP1;LAPTM5;NFAM1;CXCR4;VSIR	PTAFR;VSIR;KLF4;CSF1R;UCP2;PYCARD;IRF8;LAPTM5;PKM;ARRB2;IFI205;TENT5A;FCER1G;AIF1;LRRK2;AXL;CTSH;ANXA1;IFNGR1;NCKAP1L;BASP1;KDM6B;CD83;GLIPR2;GNAI2;CYBA;CD84;SLC11A1;TBXAS1;NFAM1;DAB2;CYBB;SYK;TYROBP;CD86;PRKCB	TBXAS1;CD55;BASP1;AXL;ARRB2;DAB2;NCKAP1L;IFNGR1;GNAI2;AIF1;PYCARD;PKM;LRRK2;SYK;CYBA;KDM6B;SLC11A1;NFAM1;PRKCB;TLR2;HCLS1;FCER1G;IRF8;IL6RA;CYBB;FGR;CSF1R;TYROBP;UCP2;LAPTM5;VSIR;KLF4;CD84	TLR2;ETS1;CYBB;LAPTM5;FGR;CXCR4;PTPN22;AIF1;BCL2;MBP;CSF1R;TYROBP;BTG1;ANXA1;CD83;PRKCH;SASH3;SYK;HCLS1;KLRK1;LYN;SEMA4D;RPS19;FCER1G;PTPRC;SLC11A1;PRKCB;KLF4	ETS1;KIT;CD83;SYK;FCER1G;IFI205;PTPN22;AIF1;TOX;RASGRP1;CYBB;PRKCB;PRKCQ;LAPTM5;KLRK1;SASH3;LTB;KLF4;SEMA4D;MBP;PTPRC;PRKCH;GBP5;TYROBP;BCL2;CSF1R	SLC11A1;PRKCQ;SYK;CSF1R;PRKCH;LAPTM5;AIF1;KLF4;KLRK1;PRKCB;HCLS1;LTB;FCER1G;FGR;KIT;SASH3;TOX;SEMA4D;PTPN22;RASGRP1;TYROBP;CYBB;TLR2;MBP;PTPRC	PTGIS;ANGPT2;SPRY1;BMP4;TIE1;ANXA2;GJA1;GRB10;KLF4;DLL1;TIAM1;PDGFB;ACVRL1;ANXA1;CD34;APP;IL33	ACVRL1;MMRN2;MEF2C;TGFBR3;EFNB2;TIAM1;ANXA2;PDGFB;IL33;DLL1;AKAP12;BMP4;RELN;KLF4;GJA5;KDR;APP;NPR1;PLAC8;TIE1;DAB2;RAMP2;GRB10;YBX3;CAV1;EDNRB;KDM6B;PTGIS;TLR4;TEK;CD34	ECM1;PLAC8;PLXND1;PTGIS;HEG1;ACVRL1;ANXA2;RELN;C1QTNF1;MEF2C;PDGFB;DLL1;IL33;AQP1;WWTR1;FLT4;ITGA5;RAMP2;ENG;TGFBR3;SERPINE1;NOS3;FLT1;KDR;CD55;AKAP12;DAB2;GNAI2;KDM6B;TIE1;TLR4;CDH5;SHANK3;MMRN2;KLF4
GOBP_NEGATIVE_REGULATION_OF_HYDROLASE_ACTIVITY	2.947	3.927					2.108	1.711		1.316			2.517		1.465	10	11					7	8		6			8		9	SERPING1;HC;SERPINA1E;HRG;SERPINA3N;AMBP;FABP1;ANGPTL3;ANGPTL4;APOA2	HRG;HC;APOC3;SERPING1;AMBP;SERPINA1E;APOA2;ANGPTL4;FABP1;SERPINA3N;APOC1					THBS1;CTSB;ANXA1;GNAI2;FKBP1A;NCKAP1L;KLF4	ANXA1;CTSB;NCKAP1L;KLF4;GNAI2;ARRB2;CD44;LRRK2		CD44;TNFAIP8;KLRK1;ANXA1;KLF4;SEMA4D			SERPINH1;SPRY1;ANXA2;KLF4;TIMP2;ANXA1;FKBP1A;APP		GNAI2;MAPK7;ECM1;SERPINE1;NOS3;ANXA2;TFPI;KLF4;AQP1
GOBP_ALKALOID_METABOLIC_PROCESS		3.917															3															NNMT;CYP3A13;CYP2D10
GOBP_REGULATION_OF_PLASMA_LIPOPROTEIN_PARTICLE_LEVELS	1.327	3.903														3	6														APOA2;ABCA1;APOB	ABCA1;APOC3;APOB;APOA2;APOA5;APOC1
GOBP_NEGATIVE_REGULATION_OF_CATALYTIC_ACTIVITY	3.375	3.812					1.5			2.376		1.302	2.135		1.468	16	16					9			13		8	11		15	HP;CHORDC1;SERPING1;HC;SERPINA1E;SERPINA3N;HRG;AMBP;ACACB;ERRFI1;LRP6;FABP1;ANGPTL3;DNAJA1;ANGPTL4;APOA2	ERRFI1;CHORDC1;ACACB;HC;SERPING1;AMBP;APOC3;HRG;SERPINA1E;APOA2;HP;ANGPTL4;FABP1;SERPINA3N;LRP6;APOC1					OAZ1;CTSB;ANXA1;GNAI2;GADD45B;FKBP1A;THBS1;NCKAP1L;KLF4			PTPN22;CD44;PTPRC;NFKB1;TNFAIP3;TNFAIP8;PIP4K2A;KLRK1;LYN;ANXA1;GADD45B;KLF4;SEMA4D		PTPN22;GADD45B;TNFAIP3;PIP4K2A;KLF4;PTPRC;KLRK1;SEMA4D	PALM;SERPINH1;SPRY1;BMP4;NES;ANXA2;KLF4;TIMP2;ANXA1;FKBP1A;APP		WWTR1;GNAI2;MAPK7;ECM1;PTPRB;SERPINE1;NOS3;RASIP1;HEG1;SOX7;PHACTR2;ANXA2;TFPI;KLF4;AQP1
GOBP_ASPARTATE_FAMILY_AMINO_ACID_METABOLIC_PROCESS	2.494	3.767	2.651													4	5	4													ADI1;AASS;BHMT;GNMT	ASPG;AASS;GNMT;BHMT;SDS	AASS;GNMT;RIDA;BHMT
GOBP_REGULATION_OF_LIPID_BIOSYNTHETIC_PROCESS	2.086	3.748											1.438			6	8											4			MLXIPL;PROX1;SOD1;IDH1;H6PD;APOB	IDH1;APOC3;APOB;PROX1;H6PD;PCK1;APOA5;APOC1											ANXA1;ABCG1;IGFBP7;PDGFB
GOBP_NEGATIVE_REGULATION_OF_LIPID_LOCALIZATION	1.651	3.643														3	5														APOA2;CRP;ABCA1	ABCA1;APOC3;APOA2;CRP;APOC1
GOBP_LEUKOCYTE_MEDIATED_IMMUNITY	2.186	3.603					2.925	6.724	6.006	3.582	4.147	5.384				9	11					9	17	15	11	11	12				C6;SERPING1;HC;C8A;MAVS;C8B;C4BP;C9;CRP	C8B;HPX;HC;SERPING1;C6;C8A;CRP;C9;CLU;AZGP1;C4BP					CTSH;C1QA;C1QB;TYROBP;PTAFR;CD84;C1QC;NCKAP1L;HMOX1	PTAFR;NCKAP1L;GZMB;STX7;FCGR3;C1QB;WAS;ARRB2;SPI1;FCER1G;TYROBP;C1QC;C1QA;SYK;CD84;ITGB2;CTSH	C1QB;FCGR3;WAS;CD55;FGR;TYROBP;FCER1G;C1QC;ARRB2;NCKAP1L;C1QA;SYK;ITGB2;CD84;SPI1	FCER1G;PTPRC;CORO1A;TYROBP;RAC2;SASH3;SYK;ITGB2;KLRK1;FGR;LYN	KIT;RASGRP1;CORO1A;SYK;FCER1G;FCGR3;PTPRC;GZMB;KLRK1;TYROBP;SASH3	FGR;RAC2;SYK;RASGRP1;KIT;CORO1A;ITGB2;TYROBP;SASH3;PTPRC;KLRK1;FCER1G
GOBP_POSITIVE_REGULATION_OF_CHOLESTEROL_ESTERIFICATION		3.576															3															APOA5;APOA2;APOC1
GOBP_NEGATIVE_REGULATION_OF_RESPONSE_TO_WOUNDING	2.477	3.576													1.825	5	6													5	SERPING1;FGG;CPB2;HRG;FGB	HRG;FGB;SERPING1;CPB2;FGG;ABAT													PDGFB;SERPINE1;NOS3;C1QTNF1;TFPI
GOBP_STEROL_HOMEOSTASIS	2.477	3.576														5	6														EPHX2;ANGPTL3;ABCA1;APOA2;APOB	ABCA1;APOC3;APOB;APOA2;EPHX2;APOA5
GOBP_REGULATION_OF_FATTY_ACID_METABOLIC_PROCESS	1.765	3.576														4	6														ACACB;LONP2;MLXIPL;FABP1	LONP2;ACACB;APOC3;FABP1;APOA5;APOC1
GOBP_NEGATIVE_REGULATION_OF_LIPID_CATABOLIC_PROCESS	1.355	3.573														2	4														APOA2;ACACB	APOA2;ACACB;APOC3;APOC1
GOBP_REGULATION_OF_LIPID_STORAGE	3.292	3.552														5	5														ACACB;PLIN2;ABCA1;CRP;APOB	ABCA1;ACACB;PLIN2;APOB;CRP
GOBP_ORGANOPHOSPHATE_ESTER_TRANSPORT	1.34	3.468														4	7														APOA2;SLC17A9;SCP2;ABCA1	ABCA1;APOC3;SCP2;APOA2;APOA5;SLC17A9;APOC1
GOBP_VERY_LOW_DENSITY_LIPOPROTEIN_PARTICLE_ASSEMBLY		3.459															3															APOB;APOC3;APOC1
GOBP_POSITIVE_REGULATION_OF_LIPID_CATABOLIC_PROCESS	2.125	3.459	2.268													3	4	3													APOA2;ANGPTL3;FABP1	APOA5;APOA2;AADAC;FABP1	AADAC;ANGPTL3;FABP1
GOBP_IMMUNE_RESPONSE	2.014	3.436					9.653	19.739	21.225	13.031	16.714	18.681				20	23					32	55	53	41	42	42				SERPING1;FGL1;MAVS;FYB2;FGB;AMBP;C4BP;C9;C8A;C6;IL1RAP;PRG4;HC;HRG;C8B;APOA2;VNN1;HAMP;STAT3;CRP	APOA2;C8A;STAT3;AZGP1;HRG;HPX;PRG4;PCK1;IL1RAP;CRP;HAMP;CLU;FGL1;FYB2;SERPING1;AMBP;C9;CFHR1;C4BP;C8B;FGB;HC;C6					IL1RN;FKBP1A;CYBA;VIM;TYROBP;CTSH;ANXA1;TLR2;CD84;IRF8;PRKCB;CD83;C1QA;CYBB;FGL2;NCF2;PTAFR;NCKAP1L;HMOX1;AXL;THBS1;PLD4;ICOSL;C1QB;LAIR1;LAPTM5;LST1;KLHL6;NFAM1;C1QC;CXCR4;VSIR	PTAFR;VSIR;SECTM1A;CFP;STX7;FCGR3;FGL2;CSF1R;FYB;PYCARD;SPI1;SLA;C1QC;C1QA;VSIG4;IRF8;LAPTM5;GZMB;KLHL6;CD5L;C1QB;ARRB2;IFI205;FCER1G;AIF1;THEMIS2;CTSH;AXL;ANXA1;NCKAP1L;CD83;LAIR1;CYBA;PLD4;HCK;S100A9;RNASE6;NCF2;ICOSL;CD84;SLC11A1;S100A8;VIM;NFAM1;MRC1;CYBB;WAS;SAMHD1;LY86;TYROBP;SYK;IGSF6;ITGB2;CD86;PRKCB	WAS;CD55;VIM;S100A9;MRC1;AXL;ICOSL;ARRB2;NCKAP1L;CD5L;IGSF6;HCK;C1QB;FCGR3;AIF1;LAPTM5;PYCARD;SYK;CYBA;CFP;SLC11A1;FPR1;S100A8;NFAM1;PRKCB;TLR2;C1QC;FCER1G;SLA;IRF8;IL6RA;SLC15A3;ITGB2;LAIR1;REL;THEMIS2;NCF2;LY86;FYB;CYBB;MARCO;FGR;KLHL6;PLD4;CSF1R;TYROBP;C1QA;FGL2;LST1;VSIG4;VSIR;CD84;SPI1	ITGAL;TLR2;ETS1;CYBB;LAPTM5;FGR;CXCR4;PTPN22;AIF1;BCL2;MBP;CSF1R;TCF7;TYROBP;TNFAIP3;RAC2;FGL2;ANXA1;CD83;CD48;LST1;VIM;SLA;CORO1A;PRKCH;SASH3;SYK;ADGRE5;NCF1;KLRK1;LYN;CCR5;FYN;SEMA4D;NCF2;RPS19;FCER1G;PTPRC;SLC11A1;ITGB2;PRKCB	ETS1;KIT;CD83;SYK;LCK;FCER1G;IFI205;FCGR3;PTPN22;S100A8;CCR5;AIF1;GZMB;RASGRP1;SAMHD1;CYBB;PRKCB;CORO1A;FYB;IGSF6;PRKCQ;LAPTM5;KLRK1;SASH3;CD48;LTB;RNASE6;SEMA4D;FYN;MBP;PTPRC;S100A9;PRKCH;GBP5;TYROBP;BCL2;CSF1R;TCF7;VIM;NCF2;ADGRE5;FGL2	SLC11A1;PRKCQ;FYB;S100A9;SYK;PRKCH;CSF1R;LAPTM5;LCK;TCF7;SLA;AIF1;FPR1;RAC2;FGL2;CORO1A;ITGB2;KLRK1;PRKCB;LTB;FCER1G;LST1;HCK;FGR;KIT;SASH3;CCR5;SEMA4D;PTPN22;IGSF6;ITGAL;TNFAIP3;VIM;RASGRP1;TYROBP;CYBB;TLR2;MBP;PTPRC;S100A8;NCF2;CD48
GOBP_PHOSPHOLIPID_TRANSPORT		3.39															6															ABCA1;APOC3;SCP2;APOA2;APOA5;APOC1
GOBP_TRIGLYCERIDE_CATABOLIC_PROCESS		3.354															4															APOA5;APOC3;APOB;AADAC
GOBP_ZYMOGEN_ACTIVATION	3.09	3.354					1.855	3.055	2.388							5	5					3	5	4							HP;FGG;CPB2;F9;FGB	FGB;F9;HP;CPB2;FGG					THBS1;CTSH;VSIR	VSIR;LGMN;CD5L;PYCARD;CTSH	PYCARD;CD5L;VSIR;LGMN
GOBP_TRIGLYCERIDE_RICH_LIPOPROTEIN_PARTICLE_REMODELING		3.346															3															APOA5;APOA2;APOC3
GOBP_FATTY_ACID_CATABOLIC_PROCESS	3.889	3.306	2.492													7	6	5													PHYH;SLC27A2;ACAD11;ACACB;SCP2;LONP2;FABP1	LONP2;ACACB;SCP2;PCK1;FABP1;ACAD11	PHYH;ECHDC2;PCK1;SCP2;FABP1
GOBP_BIOLOGICAL_PROCESS_INVOLVED_IN_INTERSPECIES_INTERACTION_BETWEEN_ORGANISMS	2.481	3.26					5.257	14.168	15.864	7.873	7.49	7.843			1.621	21	22					24	46	45	32	28	27			25	SERPING1;MAVS;FAM20A;ABCA1;FGB;XPR1;C4BP;LRG1;C8A;C9;C6;IL1RAP;HC;HRG;C8B;APOB;HP;VNN1;HMGCS2;HAMP;CRP	ABCA1;APOB;FAM20A;HMGCS2;C8A;LRG1;HRG;HPX;HP;PCK1;IL1RAP;CRP;HAMP;CLU;SERPING1;C9;CFHR1;C4BP;C8B;FGB;HC;C6					NPC2;CYBA;VIM;TYROBP;ANXA1;TLR2;VCAM1;CD84;WDFY4;IRF8;C1QA;CTSB;CYBB;COTL1;FGL2;NCF2;PTAFR;IFNGR1;AXL;PLD4;C1QB;KLHL6;C1QC;CXCR4	PTAFR;CFP;CSF1R;FCGR3;FGL2;PYCARD;SPI1;SLA;C1QC;C1QA;VSIG4;IRF8;GZMB;KLHL6;C1QB;ARRB2;IFI205;TENT5A;FCER1G;AIF1;COTL1;AXL;ANXA1;IFNGR1;CTSB;WDFY4;CYBA;PLD4;HCK;S100A9;RNASE6;NCF2;VCAM1;CD84;SLC11A1;S100A8;VIM;MRC1;NPC2;CYBB;WAS;SAMHD1;LY86;TYROBP;SYK;CD86	WAS;VCAM1;CD55;VIM;S100A9;MRC1;AXL;ARRB2;IFNGR1;HCK;C1QB;FCGR3;AIF1;PYCARD;SYK;CYBA;CFP;SLC11A1;S100A8;TLR2;C1QC;FCER1G;SLA;IRF8;IL6RA;SLC15A3;REL;WDFY4;NCF2;LY86;CYBB;MARCO;FGR;COTL1;KLHL6;PLD4;CSF1R;TYROBP;NPC2;C1QA;FGL2;VSIG4;CTSB;CD84;SPI1	TLR2;NFKB1;CYBB;FGR;CXCR4;PTPN22;AIF1;BCL2;CSF1R;TYROBP;TNFAIP3;FGL2;RPS15A;ANXA1;VIM;SLA;NPC2;CORO1A;SYK;NCF1;KLRK1;LYN;PTGER2;CCR5;WIPF1;FYN;NCF2;RPS19;FCER1G;PTPRC;SLC11A1;COTL1	SYK;FCER1G;LCK;IFI205;FCGR3;PTPN22;S100A8;CCR5;AIF1;GZMB;RASGRP1;SAMHD1;CYBB;CORO1A;KLRK1;RNASE6;FYN;PTPRC;S100A9;GBP5;TYROBP;BCL2;CSF1R;COTL1;VIM;NCF2;WIPF1;FGL2	SLC11A1;WIPF1;S100A9;SYK;COTL1;CSF1R;LCK;SLA;AIF1;FGL2;CORO1A;KLRK1;FCER1G;HCK;FGR;PTGER2;CCR5;PTPN22;TNFAIP3;VIM;RASGRP1;TYROBP;CYBB;TLR2;PTPRC;S100A8;NCF2			PLAC8;CLEC4G;ADAM15;MYO1C;SMAD6;MRC1;MEF2C;STAB1;SELP;AQP1;ITGA5;SEC14L1;CAV2;SERPINE1;NOS3;ICAM1;VCAM1;PLSCR4;CD55;AKAP12;VIM;TLR4;FCGR3;CFP;STAB2
GOBP_ANIMAL_ORGAN_REGENERATION	2.949	3.204														5	5														CPB2;HAMP;BAAT;PTPN3;APOA2	NNMT;APOA2;CPB2;HAMP;PTPN3
GOBP_REGULATION_OF_CELLULAR_AMINE_METABOLIC_PROCESS		3.204								1.352							4								2							BHMT;NNMT;ABAT;ALDH2								SLC7A7;ITGB2
GOBP_LIPID_HOMEOSTASIS	2.874	3.155	1.317													7	7	4													EPHX2;MLXIPL;ANGPTL3;ANGPTL4;ABCA1;APOA2;APOB	ABCA1;APOC3;APOB;APOA2;EPHX2;ANGPTL4;APOA5	MLXIPL;EPHX2;ANGPTL3;ANGPTL4
GOBP_REGULATION_OF_CHOLESTEROL_ESTERIFICATION		3.14															3															APOA5;APOA2;APOC1
GOBP_REGULATION_OF_INTESTINAL_ABSORPTION	1.736	3.14														2	3														APOA2;HAMP	APOA5;HAMP;APOA2
GOBP_NADP_METABOLIC_PROCESS	1.938	3.125														3	4														IDH1;ALDH1L1;H6PD	IDH1;H6PD;FMO5;ALDH1L1
GOBP_BILE_ACID_BIOSYNTHETIC_PROCESS	4.009	3.125	2.038													5	4	3													SLC27A2;BAAT;SCP2;PROX1;CYP27A1	PROX1;CYP27A1;SLC27A5;SCP2	BAAT;CYP8B1;SCP2
GOBP_REGULATION_OF_HYDROLASE_ACTIVITY	2.023	3.124		1.583	1.833	2.144	4.459	6.724	4.069	3.483	5.494	4.496	1.551		2.211	15	17		9	11	10	18	27	20	18	20	17	11		21	NLRP12;SERPING1;HC;SERPINA3N;SERPINA1E;HRG;ARHGEF26;AMBP;FABP1;RALGAPA2;ANGPTL3;ANGPTL4;STAT3;APOA2;SOD1	HRG;AMBP;HC;APOC3;SERPING1;SERPINA1E;APOA2;RALGAPA2;STAT3;ANGPTL4;RUNDC1;FABP1;SERPINA3N;NLRP12;GRTP1;APOA5;APOC1		COL6A3;FBLN1;TIMP2;KLF4;THBS1;THY1;PCOLCE;ANTXR1;PRKG1	ANTXR1;COL6A3;SFRP1;KLF4;FBLN1;THY1;CRYAB;RGS16;RGS4;TIMP2;PRKG1	THY1;RGS4;SERPINE1;COL6A3;AGTR1A;ITGA1;KLF4;ANTXR1;FBLN1;PCOLCE	PLEK;FGD2;CTSH;CTSB;RGS10;LAPTM5;PTAFR;ANXA1;KLF4;GNAI2;FKBP1A;THBS1;PLCB2;NCKAP1L;PPT1;PREX1;LIMS1;VSIR	PTAFR;VSIR;KLF4;RGS10;PYCARD;PLEK;CD44;LAPTM5;ARRB2;RGL1;LRRK2;CTSH;SRGAP2;PPT1;ANXA1;CTSB;NCKAP1L;FGD2;GNAI2;PLCB2;S100A9;S100A8;LGMN;LIMS1;PREX1;SYK;CD86	S100A9;ARRB2;NCKAP1L;PLCB2;GNAI2;RGL1;PYCARD;LRRK2;SYK;RGS10;S100A8;PPT1;LGMN;FGD2;SRGAP2;PREX1;LAPTM5;CTSB;VSIR;KLF4	ARHGAP25;CD44;KLF4;ARHGAP45;PTPRC;PBXIP1;TNFAIP8;SYK;LAPTM5;ARHGAP9;KLRK1;ANXA1;CYFIP2;PLEK;LYN;FYN;SEMA4D;MBP	KIT;CYFIP2;SYK;LCK;S100A8;RASGRP1;LAPTM5;ARHGAP9;KLRK1;PLEK;PBXIP1;KLF4;SEMA4D;FYN;MBP;PTPRC;S100A9;TNFAIP8;ARHGAP25;CD44	ARHGAP25;ARHGAP9;S100A9;PBXIP1;CYFIP2;SYK;ARHGAP45;KIT;RASGRP1;KLF4;MBP;LAPTM5;PTPRC;LCK;KLRK1;S100A8;SEMA4D	SERPINH1;SPRY1;ITGA6;ANXA2;KLF4;TIAM1;TIMP2;ANXA1;NEDD9;FKBP1A;APP		UACA;ECM1;PLXND1;RASIP1;ANXA2;ITGA6;MEF2C;MAPK7;SOX7;RAPGEF5;AQP1;LGMN;ARAP3;CAV2;SERPINE1;NOS3;FLT1;GNAI2;NEDD9;TFPI;KLF4
GOBP_HIGH_DENSITY_LIPOPROTEIN_PARTICLE_ASSEMBLY	1.692	3.056														2	3														APOA2;ABCA1	APOA5;ABCA1;APOA2
GOBP_REGULATION_OF_TRIGLYCERIDE_CATABOLIC_PROCESS		3.056															3															APOA5;APOC3;AADAC
GOBP_CELLULAR_AMINO_ACID_BIOSYNTHETIC_PROCESS	2.812	3.052	2.192													5	5	4													OAT;AASS;BHMT;ADI1;ALDH1A7	AASS;BHMT;SDS;OAT;ABAT	AASS;ASL;ABAT;BHMT
GOBP_HEMOSTASIS	2.156	3.04	1.434	2.719	2.345	2.13		1.998	1.762	1.888	2.196	1.31	1.61	2.99	3.346	7	8	5	6	6	5		7	6	6	6	4	5	11	11	SERPING1;FGG;CPB2;SERPINA1E;HRG;F9;FGB	HRG;FGB;SERPING1;F9;SERPINA1E;CPB2;FGG;ABAT	CYP4A32;F9;SERPINA1E;KLKB1;ABAT	FBLN1;FLNA;THBS1;CSRP1;COL3A1;PRKG1	PRKG1;FBLN1;FLNA;MYL9;COL3A1;ACTN1	C1QTNF1;ACTN1;SERPINE1;CSRP1;FBLN1		RAP2B;WAS;FCER1G;SYK;MERTK;PLEK;AXL	WAS;RAP2B;FCER1G;AXL;SYK;MERTK	FCER1G;SYK;LYN;PLEK;FLNA;PABPC4	FLNA;SYK;PLEK;FCER1G;LCK;PRKCQ	SYK;FCER1G;PRKCQ;LCK	CSRP1;VWF;COL3A1;CD34;PDGFB	SELP;TFPI;TLR4;CD34;ACTN1;MMRN1;PAPSS2;PDGFB;COL3A1;CAV1;VWF	VWF;COL3A1;PDGFB;CSRP1;SELP;ACTN1;TLR4;SERPINE1;NOS3;C1QTNF1;TFPI
GOBP_HIGH_DENSITY_LIPOPROTEIN_PARTICLE_REMODELING		2.973															3															APOA2;APOC3;APOC1
GOBP_AMINE_METABOLIC_PROCESS		2.961	2.285														6	5														NNMT;HAAO;ALDH2;ALDH7A1;BHMT;ABAT	TDO2;ALDH7A1;HAAO;ABAT;BHMT
GOBP_RESPONSE_TO_DEXAMETHASONE	1.818	2.932	1.924													3	4	3													SRD5A1;ERRFI1;TAT	ERRFI1;TAT;SRD5A1;PCK1	TAT;SRD5A1;PCK1
GOBP_RESPONSE_TO_ORGANIC_CYCLIC_COMPOUND	3.889	2.932	3.032		1.62		2.092	1.475		4.237	1.322					19	16	15		10		12	14		19	10					AR;MAVS;SRD5A1;SOD1;TAT;GHR;ACACB;LRP6;CAT;APOA2;APOB;HMGCS2;HAMP;ERRFI1;LONP2;ACSL1;PLIN2;STAT3;IDH1	ERRFI1;IDH1;ACACB;PLIN2;SRD5A1;LONP2;APOB;APOA2;STAT3;PCK1;HMGCS2;HAMP;TAT;CLU;LRP6;ABAT	TAT;HMGCS2;ACSL1;LRP6;CAT;RIOK3;EPHX1;PLIN2;PCK1;SRD5A1;STAT3;MAVS;CYP8B1;GHR;ABAT		EDNRB;COL1A1;SFRP1;FOS;FLNA;RGS4;MMP2;IGFBP7;CRYAB;IGFBP5		ARPC1B;DUSP6;CD83;IL1RN;CYBB;PTAFR;ANXA1;SGK1;TLR2;THBS1;CYBA;CXCR4	ANXA1;PTAFR;FOLR2;TET2;DUSP6;ARPC1B;DAB2;CD83;CYBB;ARRB2;CYBA;P2RY13;AIF1;LRRK2		TLR2;NFKB1;CYBB;SGK1;CXCR4;AIF1;BCL2;MBP;BTG2;KLF2;ANXA1;CD83;FLNA;RPL27;GNG2;TET2;LYN;PTGER2;CCR5	CD83;CYBB;FLNA;KLF2;TET2;MBP;GNG2;CCR5;AIF1;BCL2
GOBP_INTESTINAL_ABSORPTION	1.818	2.932														3	4														APOA2;HAMP;FABP1	APOA5;HAMP;FABP1;APOA2
GOBP_MONOCARBOXYLIC_ACID_CATABOLIC_PROCESS	4.297	2.932	3.032													8	6	6													PHYH;SULT2A7;ACAD11;SLC27A2;ACACB;SCP2;LONP2;FABP1	LONP2;ACACB;SCP2;PCK1;FABP1;ACAD11	CYP4A32;PHYH;ECHDC2;PCK1;SCP2;FABP1
GOBP_FATTY_ACID_BETA_OXIDATION	3.548	2.911	1.385													6	5	3													SLC27A2;ACAD11;ACACB;SCP2;FABP1;LONP2	LONP2;ACACB;SCP2;FABP1;ACAD11	ECHDC2;FABP1;SCP2
GOBP_AROMATIC_AMINO_ACID_FAMILY_CATABOLIC_PROCESS	2.706	2.91	6.004													3	3	5													HAAO;QDPR;TAT	HAAO;QDPR;TAT	TAT;TDO2;QDPR;HGD;HAAO
GOBP_REGULATION_OF_WOUND_HEALING	1.971	2.886		1.432											1.403	5	6		3											5	SERPING1;FGG;CPB2;HRG;FGB	HRG;FGB;SERPING1;CPB2;FGG;ABAT		THBS1;ACTA2;PRKG1											PDGFB;SERPINE1;NOS3;C1QTNF1;TFPI
GOBP_NEGATIVE_REGULATION_OF_PROTEOLYSIS	2.562	2.85														9	9														SERPING1;CPB2;HC;SERPINA3N;HRG;SERPINA1E;AMBP;PTPN3;FABP1	HRG;AMBP;HC;SERPING1;CPB2;FABP1;SERPINA3N;PTPN3;SERPINA1E
GOBP_STEROID_ESTERIFICATION		2.838															3															APOA5;APOA2;APOC1
GOBP_DEFENSE_RESPONSE_TO_OTHER_ORGANISM	2.123	2.836					4.11	14.478	18.275	7.429	9.897	9.352				15	16					17	38	40	25	26	24				C6;HP;IL1RAP;VNN1;SERPING1;HC;HRG;HAMP;C8A;MAVS;C8B;C4BP;C9;CRP;FGB	C8B;HPX;SERPING1;HC;FGB;HRG;HP;C6;C8A;IL1RAP;CRP;C9;CFHR1;HAMP;CLU;C4BP					C1QA;C1QB;CYBB;VIM;COTL1;FGL2;NCF2;ANXA1;TLR2;IFNGR1;CD84;CYBA;C1QC;AXL;TYROBP;IRF8;PLD4	CFP;CSF1R;FCGR3;FGL2;PYCARD;SPI1;SLA;C1QC;C1QA;VSIG4;IRF8;GZMB;C1QB;ARRB2;IFI205;FCER1G;AIF1;COTL1;AXL;ANXA1;IFNGR1;CYBA;PLD4;HCK;S100A9;RNASE6;NCF2;CD84;SLC11A1;S100A8;VIM;MRC1;CYBB;WAS;SAMHD1;LY86;TYROBP;SYK	WAS;CD55;VIM;S100A9;MRC1;AXL;ARRB2;IFNGR1;HCK;C1QB;FCGR3;AIF1;PYCARD;SYK;CYBA;CFP;SLC11A1;S100A8;TLR2;C1QC;FCER1G;SLA;IRF8;IL6RA;SLC15A3;REL;NCF2;LY86;CYBB;MARCO;FGR;COTL1;PLD4;CSF1R;TYROBP;C1QA;FGL2;VSIG4;CD84;SPI1	TLR2;CYBB;FGR;PTPN22;AIF1;BCL2;CSF1R;TYROBP;TNFAIP3;FGL2;ANXA1;VIM;SLA;CORO1A;SYK;NCF1;KLRK1;LYN;FYN;NCF2;RPS19;FCER1G;PTPRC;SLC11A1;COTL1	SYK;FCER1G;LCK;IFI205;FCGR3;PTPN22;S100A8;AIF1;GZMB;RASGRP1;SAMHD1;CYBB;CORO1A;KLRK1;RNASE6;FYN;PTPRC;S100A9;GBP5;TYROBP;BCL2;CSF1R;COTL1;VIM;NCF2;FGL2	SLC11A1;S100A9;SYK;COTL1;CSF1R;LCK;SLA;AIF1;FGL2;CORO1A;KLRK1;FCER1G;HCK;FGR;PTPN22;TNFAIP3;VIM;RASGRP1;TYROBP;CYBB;TLR2;PTPRC;S100A8;NCF2
GOBP_RESPONSE_TO_INTERLEUKIN_6	1.751	2.835														3	4														HAMP;FGG;STAT3	HAMP;FGG;PCK1;STAT3
GOBP_XENOBIOTIC_METABOLIC_PROCESS	1.844	2.804	4.9													4	5	7													GLYAT;SULT2A7;ACSL1;CYP3A13	CYP2D10;FMO5;CYP3A13;CMBL;AADAC	CYP4A32;ACSL1;EPHX1;CYP2D10;AOX1;GLYAT;AADAC
GOBP_NEGATIVE_REGULATION_OF_STEROL_TRANSPORT		2.774															3															APOA2;APOC3;APOC1
GOBP_PLASMA_LIPOPROTEIN_PARTICLE_CLEARANCE		2.767															4															APOA2;APOB;APOC3;APOC1
GOBP_OLEFINIC_COMPOUND_METABOLIC_PROCESS	3.28	2.765	3.722													7	6	7													CYP3A13;EPHX2;SCP2;SRD5A1;ADH4;ALDH1A7;H6PD	SRD5A1;SCP2;CYP2D10;H6PD;CYP3A13;EPHX2	CYP4A32;EPHX1;CYP2D10;EPHX2;SCP2;H6PD;SRD5A1
GOBP_LIPID_STORAGE	3.375	2.765														6	5														ACACB;PLIN2;ANGPTL3;ABCA1;CRP;APOB	ABCA1;ACACB;PLIN2;APOB;CRP
GOBP_INFLAMMATORY_RESPONSE	2.849	2.764					3.506	9.397	10.775	12.055	8.558	12.762		1.659	1.959	15	14					14	28	28	29	22	26		17	17	HP;NLRP12;IL1RAP;VNN1;APOA2;CAMK1D;HC;SERPINA1E;SERPINA3N;HAMP;SAA4;ORM2;STAT3;CRP;SOD1	HC;APOA2;ORM2;HP;STAT3;CAMK1D;IL1RAP;CRP;NLRP12;SERPINA3N;HAMP;KPNA6;SAA4;SERPINA1E					IL1RN;CYBB;PTAFR;ANXA1;TLR2;CYBA;VCAM1;NFAM1;THBS1;AXL;CXCR4;KLF4;HMOX1;PLD4	PTAFR;KLF4;FCGR3;CSF1R;PYCARD;CD44;CD5L;AIF1;LIPA;THEMIS2;LRRK2;AXL;ANXA1;FOLR2;KDM6B;CYBA;PLD4;HCK;S100A9;VCAM1;SLC11A1;S100A8;NFAM1;CYBB;LY86;SYK;METRNL;ITGB2	VCAM1;S100A9;AXL;CD5L;HCK;FCGR3;AIF1;PYCARD;LRRK2;SYK;CYBA;KDM6B;FPR1;S100A8;SLC11A1;NFAM1;TLR2;FOLR2;IL6RA;ITGB2;REL;THEMIS2;LY86;CYBB;FGR;PLD4;CSF1R;KLF4	ITGAL;ETS1;TLR2;AOAH;NFKB1;CYBB;ALOX5AP;FGR;CXCR4;AIF1;CD44;CSF1R;TNFAIP3;ANXA1;SYK;ATM;ADGRE5;NCF1;LYN;PTGER2;CCR5;FYN;AKNA;RPS19;PTPRC;SLC11A1;PBXIP1;ITGB2;KLF4	ETS1;KIT;SYK;FCGR3;S100A8;CCR5;AIF1;RASGRP1;CYBB;AKNA;PRKCQ;AOAH;PBXIP1;KLF4;FYN;PTPRC;S100A9;GBP5;CSF1R;ADGRE5;ATM;CD44	SLC11A1;PRKCQ;S100A9;PBXIP1;SYK;CSF1R;AOAH;AIF1;FPR1;ITGB2;KLF4;HCK;ALOX5AP;FGR;KIT;PTGER2;CCR5;ATM;ITGAL;TNFAIP3;RASGRP1;CYBB;TLR2;PTPRC;S100A8;AKNA		EDNRB;SELP;CALCRL;KDM6B;PTGIS;STAB1;PRCP;MAPK7;PTGS1;KLF4;TLR4;VCAM1;TEK;FCGR3;IL33;DNASE1L3;APP	MAPK7;STAB1;CALCRL;SELP;ECM1;KDM6B;TLR4;KLF4;PTGIS;CDH5;SERPINE1;FCGR3;DNASE1L3;IL33;PRCP;VCAM1;PTGS1
GOBP_LIPOPROTEIN_METABOLIC_PROCESS		2.736															6															ABCA1;APOC3;APOB;APOA2;APOA5;APOC1
GOBP_VITAMIN_D_METABOLIC_PROCESS	2.511	2.721														3	3														CYP3A13;CYP27A1;GC	GC;CYP27A1;CYP3A13
GOBP_BILE_ACID_METABOLIC_PROCESS	4.593	2.713	1.775													6	4	3													SULT2A7;SLC27A2;BAAT;SCP2;PROX1;CYP27A1	PROX1;CYP27A1;SLC27A5;SCP2	BAAT;CYP8B1;SCP2
GOBP_REGULATION_OF_LIPASE_ACTIVITY		2.711					2.21	2.415									5					4	5									APOC3;APOA2;ANGPTL4;APOA5;APOC1					PLCB2;PPT1;PTAFR;ANXA1	ANXA1;PTAFR;PLCB2;CD86;PPT1
GOBP_REGULATION_OF_FATTY_ACID_BETA_OXIDATION	2.477	2.662														3	3														FABP1;ACACB;LONP2	LONP2;ACACB;FABP1
GOBP_REGULATION_OF_LIPID_TRANSPORT	1.315	2.63	1.434													4	6	4													APOA2;ACSL1;SCP2;ABCA1	ABCA1;APOC3;SCP2;APOA2;APOA5;APOC1	CYP4A32;CYP8B1;ACSL1;SCP2
GOBP_NEGATIVE_REGULATION_OF_SMALL_MOLECULE_METABOLIC_PROCESS	1.681	2.52														4	5														PROX1;SOD1;ACACB;STAT3	ACACB;APOC3;PROX1;STAT3;APOC1
GOBP_VITAMIN_D3_METABOLIC_PROCESS	2.358	2.509														2	2														CYP3A13;CYP27A1	CYP27A1;CYP3A13
GOBP_LIVER_MORPHOGENESIS	2.324	2.495														3	3														PROX1;CPB2;FGL1	PROX1;FGL1;CPB2
GOBP_FATTY_ACID_BIOSYNTHETIC_PROCESS		2.495															6															ACACB;APOC3;CYP2D10;CYP3A13;APOA5;APOC1
GOBP_AMMONIUM_ION_METABOLIC_PROCESS		2.495	1.434														3	2														ALDH2;ALDH7A1;SRD5A1	ALDH7A1;SRD5A1
GOBP_IRON_ION_TRANSPORT	1.581	2.476														3	4														HRG;STEAP4;HAMP	HRG;HAMP;HPX;STEAP4
GOBP_DIGESTIVE_SYSTEM_PROCESS	1.651	2.455														4	5														APOA2;HAMP;SERPINA3N;FABP1	APOA2;FABP1;HAMP;SERPINA3N;APOA5
GOBP_RESPONSE_TO_CORTICOSTEROID	2.233	2.447	1.904			1.331	2.818	1.564		2.511						6	6	5			3	6	5		6						GHR;HMGCS2;ERRFI1;TAT;SRD5A1;APOA2	ERRFI1;SRD5A1;APOA2;HMGCS2;PCK1;TAT	TAT;HMGCS2;PCK1;SRD5A1;GHR			COL1A1;IGFBP7;ENG	IL1RN;CYBB;PTAFR;ANXA1;SGK1;CYBA	ANXA1;PTAFR;CYBB;CYBA;AIF1		RPL27;CYBB;ANXA1;SGK1;AIF1;BCL2
GOBP_NEGATIVE_REGULATION_OF_LIPID_METABOLIC_PROCESS	1.645	2.441														4	5														APOA2;PROX1;SOD1;ACACB	ACACB;APOC3;PROX1;APOA2;APOC1
GOBP_CELLULAR_RESPONSE_TO_CORTICOSTEROID_STIMULUS	1.551	2.428	1.601													3	4	3													HMGCS2;SRD5A1;ERRFI1	ERRFI1;HMGCS2;SRD5A1;PCK1	SRD5A1;HMGCS2;PCK1
GOBP_REGULATION_OF_RESPONSE_TO_WOUNDING	1.675	2.425		2.58	1.62	1.324	1.578			1.875			1.512	1.411	1.544	5	6		5	4	3	4			5			4	6	6	SERPING1;FGG;CPB2;HRG;FGB	HRG;FGB;SERPING1;CPB2;FGG;ABAT		FLNA;ACTA2;KLF4;THBS1;PRKG1	ACTA2;FLNA;PRKG1;KLF4	SERPINE1;KLF4;C1QTNF1	CXCR4;KLF4;ANXA1;THBS1			TNFAIP3;ANXA1;CXCR4;FLNA;KLF4			ANXA1;CD34;KLF4;PDGFB	TFPI;KLF4;MMRN1;PDGFB;CAV1;CD34	PDGFB;SERPINE1;NOS3;C1QTNF1;TFPI;KLF4
GOBP_INDOLE_CONTAINING_COMPOUND_METABOLIC_PROCESS	1.38	2.413	2.358													2	3	3													SRD5A1;HAAO	HAAO;ALDH2;SRD5A1	HAAO;TDO2;SRD5A1
GOBP_CELLULAR_RESPONSE_TO_DEXAMETHASONE_STIMULUS	1.38	2.413	1.385													2	3	2													SRD5A1;ERRFI1	ERRFI1;SRD5A1;PCK1	SRD5A1;PCK1
GOBP_PLASMINOGEN_ACTIVATION	2.233	2.413														3	3														FGG;CPB2;FGB	FGB;FGG;CPB2
GOBP_CELLULAR_ALDEHYDE_METABOLIC_PROCESS	1.539	2.413														3	4														ALDH1A7;IDH1;ADH4	GLYCTK;IDH1;ALDH7A1;ALDH2
GOBP_VERY_LOW_DENSITY_LIPOPROTEIN_PARTICLE_CLEARANCE		2.386															2															APOC3;APOC1
GOBP_NEGATIVE_REGULATION_OF_PEPTIDASE_ACTIVITY	2.148	2.386		1.476									1.606			7	7		4									5			SERPING1;HC;SERPINA1E;HRG;SERPINA3N;AMBP;FABP1	HRG;HC;AMBP;SERPING1;FABP1;SERPINA3N;SERPINA1E		COL6A3;THBS1;TIMP2;KLF4									SERPINH1;ANXA2;KLF4;TIMP2;APP
GOBP_TRIGLYCERIDE_RICH_LIPOPROTEIN_PARTICLE_CLEARANCE		2.386															2															APOC3;APOC1
GOBP_KETONE_BODY_BIOSYNTHETIC_PROCESS		2.386															2															SLC27A5;HMGCS2
GOBP_CYTOLYSIS_BY_HOST_OF_SYMBIONT_CELLS		2.386															2															HRG;CFHR1
GOBP_HOMEOSTATIC_PROCESS	2.031	2.386					1.624	2.102	2.862	3.295	1.962	3.942		2.408	2.26	23	23					17	26	26	26	19	23		36	33	MLXIPL;SERPINA3N;FAM20A;ABCA1;STEAP4;SOD1;ALDH1A7;ALAS1;XPR1;EPHX2;ANGPTL4;ACACB;HAAO;LRP6;APOA2;APOB;CPB2;ID2;HAMP;PTPN3;ACSL1;ANGPTL3;STAT3	ABCA1;ACACB;APOC3;APOB;FAM20A;APOA2;STAT3;AZGP1;HPX;HAAO;CPB2;PCK1;EPHX2;SERPINA3N;HAMP;PTPN3;ABAT;STEAP4;ID2;ALAS1;ANGPTL4;LRP6;APOA5					PRKCB;CTSH;NPC2;SLC31A2;ANXA1;GNAI2;TBXAS1;SLC40A1;CYBA;FKBP1A;HCLS1;HMOX1;AXL;NCKAP1L;CXCR4;PPT1;VSTM4	CSF1R;UCP2;SLC31A2;SPI1;MERTK;VSTM4;LIPA;LRRK2;AXL;CTSH;PPT1;ANXA1;NCKAP1L;CD52;KDM6B;GNAI2;CYBA;S100A9;SLC11A1;S100A8;TBXAS1;SLC40A1;NPC2;SYK;METRNL;PRKCB	TBXAS1;CD55;S100A9;CD52;VSTM4;AXL;NCKAP1L;HK3;GNAI2;SLC40A1;LRRK2;SYK;CYBA;KDM6B;FPR1;S100A8;SLC11A1;SLC31A2;PRKCB;PPT1;HCLS1;CSF1R;NPC2;UCP2;MERTK;SPI1	CD52;ETS1;CXCR4;BCL2;MBP;CSF1R;TNFAIP3;KLF2;RPS14;ANXA1;NPC2;TMC8;CORO1A;SASH3;SYK;HCLS1;LYN;PTGER2;CCR5;FYN;RPS19;PTPRC;SLC11A1;IKZF1;ADGRG1;PRKCB	ETS1;KIT;ADGRG1;LCK;SYK;KLF2;S100A8;CCR5;PRKCB;CORO1A;SASH3;IKZF1;FYN;MBP;PTPRC;S100A9;BCL2;CSF1R;CD52	SLC11A1;S100A9;IKZF1;SYK;CSF1R;LCK;ADGRG1;FPR1;CD52;CORO1A;TMC8;PRKCB;HCLS1;HK3;KIT;SASH3;PTGER2;CCR5;KLF2;TNFAIP3;MBP;PTPRC;S100A8		UGCG;TAL1;MEF2C;TGFBR3;ACKR3;KLF7;TMOD3;FHL1;DLL1;EMCN;MYCT1;ADGRF5;BMP4;ESAM;GJA5;CAV2;KDR;LDB2;APP;NPR1;PRCP;ADGRG1;PECAM1;ABCG1;PLAC8;GRB10;SELENON;CAV1;EDNRB;KLF2;KDM6B;CLDN5;TLR4;SLC7A8;COL3A1;CD34	KLF7;PLAC8;EMCN;CLDN5;ADGRG1;C1QTNF1;MEF2C;COL3A1;DLL1;PRCP;AQP1;WWTR1;OIT3;ESAM;SELENON;TGFBR3;CAV2;SLC7A8;NOS3;ABCG1;ICAM1;ADGRF5;CD55;KDR;GNAI2;TAL1;PECAM1;KDM6B;KLF2;TLR4;CDH5;SHANK3;JAM2
GOBP_POSITIVE_REGULATION_OF_LIPID_STORAGE	2.196	2.384														3	3														PLIN2;ACACB;APOB	ACACB;APOB;PLIN2
GOBP_STEROID_CATABOLIC_PROCESS	2.196	2.384														3	3														SRD5A1;CYP27A1;CYP3A13	CYP27A1;SRD5A1;CYP3A13
GOBP_POLYOL_BIOSYNTHETIC_PROCESS	1.5	2.354						1.413								3	4						3								CYP3A13;QDPR;CYP27A1	CYP27A1;QDPR;PCK1;CYP3A13						PTAFR;PLEK;ASAH1
GOBP_POSITIVE_REGULATION_OF_LIPID_LOCALIZATION	2.846	2.317	2.367													6	5	5													ACACB;SCP2;ACSL1;PLIN2;ABCA1;APOB	ABCA1;ACACB;PLIN2;APOB;SCP2	CYP4A32;ACSL1;PLIN2;SCP2;CYP8B1
GOBP_REGULATION_OF_RECEPTOR_MEDIATED_ENDOCYTOSIS		2.317						1.439	1.625								5						4	4								APOC3;AHI1;CLU;APOA5;APOC1						DAB2;SYK;PPT1;ARRB2	ARRB2;DAB2;PPT1;SYK
GOBP_NEGATIVE_REGULATION_OF_PROTEIN_METABOLIC_PROCESS	2.338	2.301		1.716	2.301	1.611				1.659						17	16		10	13	9				14						NLRP12;SERPING1;CHORDC1;CPB2;MLXIPL;SERPINA1E;SERPINA3N;HC;HRG;AMBP;ERRFI1;PTPN3;AASS;LRP6;FABP1;DNAJA1;STAT3	ERRFI1;HRG;CHORDC1;HC;SERPING1;AMBP;AASS;CPB2;STAT3;FABP1;SERPINA3N;NLRP12;CLU;LRP6;PTPN3;SERPINA1E		COL6A3;FBLN1;FLNA;TIMP2;ITM2C;KLF4;IGFBP5;THBS1;THY1;EDNRB	COL6A3;EDNRB;CTDSPL;SFRP1;KLF4;FBLN1;FLNA;IGFBP3;THY1;CRYAB;ITM2C;IGFBP5;TIMP2	IGFBP5;THY1;ENG;CTDSPL;SERPINE1;COL6A3;IGFBP3;KLF4;FBLN1				PTPN22;CD44;BTG2;PTPRC;NFKB1;TNFAIP3;TNFAIP8;LYN;FYN;GADD45B;FLNA;KLF4;SEMA4D;JARID2
GOBP_LIVER_REGENERATION	2.125	2.301														3	3														HAMP;CPB2;PTPN3	PTPN3;HAMP;CPB2
GOBP_NEGATIVE_REGULATION_OF_RESPONSE_TO_EXTERNAL_STIMULUS	2.054	2.293						2.245	2.144	5.299	3.956	4.451		1.922	3.087	9	9						10	9	14	11	11		12	14	NLRP12;SERPING1;FGG;CPB2;HC;HRG;HAMP;SOD1;FGB	HRG;FGB;HC;SERPING1;CPB2;HAMP;NLRP12;FGG;ABAT						KLF4;FCGR3;FGL2;SAMHD1;ARRB2;HCK;SYK;AIF1;METRNL;VSIG4	FCGR3;AIF1;FGR;ARRB2;SYK;FGL2;VSIG4;HCK;KLF4	RPS19;KLF4;SEMA4D;AOAH;PTPRC;NFKB1;TNFAIP3;SYK;FGL2;KLRK1;FGR;LYN;FYN;AIF1	SAMHD1;SYK;FCGR3;SEMA4D;KLF4;FYN;PTPRC;AIF1;AOAH;KLRK1;FGL2	AIF1;SEMA4D;HCK;FGR;TNFAIP3;SYK;FGL2;KLF4;PTPRC;KLRK1;AOAH		CALCRL;PTGIS;SEC14L1;MAPK7;TFPI;KLF4;TEK;MMRN1;PDGFB;FCGR3;CD34;SEMA6A	MAPK7;SEC14L1;PDGFB;SEMA6A;CALCRL;SEMA3F;PTGIS;CDH5;SERPINE1;NOS3;FCGR3;C1QTNF1;TFPI;KLF4
GOBP_LIPID_OXIDATION	4.514	2.291	1.65													8	5	4													PHYH;SLC27A2;ACAD11;ACACB;SCP2;LONP2;FABP1;ADH4	LONP2;ACACB;SCP2;FABP1;ACAD11	ECHDC2;SCP2;PHYH;FABP1
GOBP_REGULATION_OF_PHOSPHOLIPID_CATABOLIC_PROCESS		2.273															2															IDH1;APOC1
GOBP_ISOLEUCINE_METABOLIC_PROCESS		2.273															2															SDS;ACADSB
GOBP_REGULATION_OF_MACROPHAGE_DERIVED_FOAM_CELL_DIFFERENTIATION	2.065	2.225								1.408						3	3								2						CRP;ABCA1;APOB	CRP;APOB;ABCA1								NFKB1;PRKCH
GOBP_CELLULAR_MODIFIED_AMINO_ACID_METABOLIC_PROCESS	2.638	2.222														7	6														VNN1;ALDH1L1;SULT2A7;GNMT;BHMT;SOD1;IDH1	IDH1;FTCD;ALDH7A1;GNMT;BHMT;ALDH1L1
GOBP_AROMATIC_AMINO_ACID_FAMILY_METABOLIC_PROCESS	2.04	2.192	4.604													3	3	5													TAT;QDPR;HAAO	HAAO;QDPR;TAT	TAT;TDO2;QDPR;HGD;HAAO
GOBP_INTRACELLULAR_STEROL_TRANSPORT	2.04	2.192								1.39			1.441			3	3								2			2			ABCA1;SCP2;LRP6	ABCA1;SCP2;LRP6								PIP4K2A;NPC2			ANXA2;ABCG1
GOBP_POSITIVE_REGULATION_OF_STEROID_METABOLIC_PROCESS		2.192															3															APOA5;APOA2;APOC1
GOBP_RESPONSE_TO_LIPID	2.64	2.179	1.517		1.656		3.801	6.237	6.62	4.853	2.386	5.455	1.426	2.131	3.276	16	14	11		10		16	25	24	20	13	18	10	21	23	GHR;AR;HMGCS2;HAMP;ERRFI1;ABCA1;TAT;LRP6;CAT;ACSL1;SRD5A1;STAT3;APOA2;MGST1;IDH1;APOB	MGST1;ERRFI1;ABCA1;IDH1;SRD5A1;APOB;APOA2;STAT3;PCK1;HMGCS2;HAMP;TAT;CLU;LRP6	TAT;HMGCS2;ACSL1;LRP6;CAT;PCK1;SRD5A1;STAT3;RIDA;CYP8B1;GHR		EDNRB;COL1A1;VIM;SFRP1;FOS;KLF4;TBX2;MMP2;IGFBP7;CRYAB		ARPC1B;CTSH;IL1RN;CYBB;PTAFR;SGK1;ANXA1;TLR2;TBXAS1;VCAM1;CYBA;THBS1;AXL;VIM;IRF8;KLF4	PTAFR;KLF4;UCP2;PYCARD;SPI1;IRF8;ARPC1B;AIF1;AXL;CTSH;ANXA1;CYBA;HCK;S100A9;VCAM1;SLC11A1;S100A8;TBXAS1;VIM;DAB2;MRC1;CYBB;LY86;SYK;CD86	TBXAS1;VCAM1;CD55;VIM;S100A9;MRC1;AXL;DAB2;HCK;AIF1;PYCARD;SYK;CYBA;ARPC1B;SLC11A1;S100A8;TLR2;IRF8;SGK1;LY86;CYBB;UCP2;KLF4;SPI1	TLR2;NFKB1;CYBB;SGK1;PTPN22;AIF1;BCL2;MBP;TNFAIP3;ANXA1;VIM;RPL27;SYK;ATM;KLRK1;LYN;PTGER2;CCR5;SLC11A1;KLF4	CYBB;S100A9;SYK;VIM;KLF4;MBP;S100A8;PTPN22;CCR5;AIF1;ATM;KLRK1;BCL2	AIF1;HCK;PTPN22;SLC11A1;ATM;TNFAIP3;S100A9;VIM;SYK;KLF4;CYBB;SGK1;TLR2;MBP;S100A8;KLRK1;PTGER2;CCR5	SGK1;BMP4;VIM;ADAM15;KLF4;IGFBP7;SMAD6;ANXA1;ABCG1;TIE1	MRC1;ADAM15;MEF2C;EFNB2;VCAM1;AKAP12;BMP4;KLF4;IGFBP7;PLSCR4;SMAD6;SELP;TFPI;ABCG1;TIE1;DAB2;VIM;CAV1;EDNRB;TLR4;PLPP1	ADAM15;SMAD6;MRC1;MEF2C;SELP;AQP1;ENG;SERPINE1;NOS3;ABCG1;SGK1;VCAM1;PLSCR4;CD55;AKAP12;DAB2;VIM;TLR4;TIE1;NASP;IGFBP7;TFPI;KLF4
GOBP_RESPONSE_TO_GROWTH_HORMONE	3.008	2.171	3.223							1.37						4	3	4							2						HMGCS2;GHR;SRD5A1;STAT3	SRD5A1;HMGCS2;STAT3	SRD5A1;GHR;HMGCS2;STAT3							LEPROTL1;LYN
GOBP_REGULATION_OF_PEPTIDASE_ACTIVITY	1.964	2.171		2.268	1.483	1.912	1.358	3.089	2.506	2.216	3.789	2.446				9	9		7	6	6	6	12	10	9	11	8				NLRP12;SERPING1;HC;SERPINA1E;SERPINA3N;HRG;AMBP;FABP1;STAT3	HRG;AMBP;HC;SERPING1;STAT3;FABP1;SERPINA3N;NLRP12;SERPINA1E		COL6A3;FBLN1;TIMP2;KLF4;THBS1;PCOLCE;ANTXR1	ANTXR1;COL6A3;KLF4;FBLN1;CRYAB;TIMP2	SERPINE1;COL6A3;KLF4;ANTXR1;FBLN1;PCOLCE	CTSH;CTSB;LAPTM5;THBS1;KLF4;VSIR	CTSB;VSIR;LAPTM5;LGMN;KLF4;ARRB2;PYCARD;SYK;S100A9;CD44;CTSH;S100A8	S100A8;S100A9;LGMN;PYCARD;ARRB2;SYK;LAPTM5;CTSB;VSIR;KLF4	CD44;KLF4;SYK;TNFAIP8;LAPTM5;LYN;CYFIP2;FYN;MBP	CYFIP2;SYK;LCK;KLF4;FYN;MBP;S100A8;LAPTM5;S100A9;CD44;TNFAIP8	S100A9;CYFIP2;SYK;MBP;KLF4;LAPTM5;LCK;S100A8
GOBP_ACETYL_COA_METABOLIC_PROCESS	2.023	2.171	2.134													3	3	3													HMGCS2;AASS;ACACB	ACACB;HMGCS2;AASS	AASS;TDO2;HMGCS2
GOBP_REGULATION_OF_CDC42_PROTEIN_SIGNAL_TRANSDUCTION		2.171															2															ABCA1;APOC3
GOBP_NEGATIVE_REGULATION_OF_FATTY_ACID_METABOLIC_PROCESS		2.171															3															ACACB;APOC3;APOC1
GOBP_REGULATION_OF_FATTY_ACID_OXIDATION	2.023	2.171														3	3														FABP1;ACACB;LONP2	LONP2;ACACB;FABP1
GOBP_NEGATIVE_REGULATION_OF_ENDOTHELIAL_CELL_APOPTOTIC_PROCESS	2.023	2.171												2.284	4.528	3	3												4	6	FGG;ANGPTL4;FGB	FGB;FGG;ANGPTL4												KDR;MAPK7;TEK;RAMP2	MAPK7;RAMP2;SERPINE1;CDH5;ICAM1;KDR
GOBP_REGULATION_OF_CATABOLIC_PROCESS	1.375	2.155								2.142						13	15								15						HP;MLXIPL;HAMP;ACACB;PTPN3;A1CF;LONP2;FABP1;ANGPTL3;C4BP;STAT3;APOA2;IDH1	IDH1;LONP2;ACACB;APOC3;C4BP;APOA2;HP;STAT3;FABP1;HAMP;CLU;APOA5;PTPN3;AADAC;APOC1								PTPN22;BTG2;SLC11A1;SESN1;TNFAIP3;LAPTM5;PIP4K2A;ATM;ATP6V1B2;VIM;TENT5C;FLNA;FYN;PABPC4;BCL2
GOBP_REGENERATION	1.501	2.152		1.671	1.482		1.399						2.443			5	6		4	4		4						6			CPB2;HAMP;BAAT;PTPN3;APOA2	NNMT;APOA2;CPB2;HAMP;APOA5;PTPN3		FLNA;THY1;MMP2;KLF4	MMP2;THY1;FLNA;KLF4		AXL;KLF4;ANXA1;HMOX1						ANGPT2;ADAM15;GJA1;KLF4;LAMB2;ANXA1
GOBP_GLUTAMATE_METABOLIC_PROCESS		2.141															3															OAT;TAT;FTCD
GOBP_NEGATIVE_REGULATION_OF_LIPID_TRANSPORT		2.141															3															APOA2;APOC3;APOC1
GOBP_DIGESTION	1.443	2.139														4	5														APOA2;HAMP;SERPINA3N;FABP1	APOA2;FABP1;HAMP;SERPINA3N;APOA5
GOBP_MONOSACCHARIDE_METABOLIC_PROCESS		2.116															7															ACACB;NNMT;GLYCTK;H6PD;PCK1;GNMT;SDS
GOBP_PTERIDINE_CONTAINING_COMPOUND_METABOLIC_PROCESS		2.109															3															QDPR;FTCD;ALDH1L1
GOBP_INNATE_IMMUNE_RESPONSE	1.869	2.104					3.668	15.348	18.275	6.85	8.981	9.056				12	12					14	35	36	21	22	21				C6;IL1RAP;SERPING1;VNN1;HC;C8A;MAVS;C8B;C4BP;C9;CRP;FGB	C8B;HPX;SERPING1;HC;FGB;C6;C8A;IL1RAP;CRP;C9;CLU;C4BP					C1QA;C1QB;CYBB;VIM;NCF2;ANXA1;TLR2;CYBA;CD84;C1QC;AXL;TYROBP;IRF8;PLD4	CFP;FCGR3;CSF1R;PYCARD;SPI1;SLA;C1QC;C1QA;VSIG4;IRF8;GZMB;C1QB;ARRB2;IFI205;FCER1G;AIF1;AXL;ANXA1;CYBA;PLD4;HCK;S100A9;RNASE6;NCF2;CD84;SLC11A1;S100A8;VIM;MRC1;CYBB;WAS;SAMHD1;LY86;TYROBP;SYK	WAS;CD55;VIM;S100A9;MRC1;AXL;ARRB2;HCK;C1QB;FCGR3;AIF1;PYCARD;SYK;CYBA;CFP;SLC11A1;S100A8;TLR2;C1QC;FCER1G;SLA;IRF8;SLC15A3;REL;NCF2;LY86;CYBB;MARCO;FGR;PLD4;CSF1R;TYROBP;C1QA;VSIG4;CD84;SPI1	TLR2;CYBB;FGR;PTPN22;AIF1;CSF1R;TYROBP;TNFAIP3;ANXA1;VIM;SLA;CORO1A;SYK;NCF1;KLRK1;LYN;FYN;NCF2;RPS19;FCER1G;SLC11A1	SYK;FCER1G;LCK;IFI205;FCGR3;PTPN22;S100A8;AIF1;GZMB;RASGRP1;SAMHD1;CYBB;CORO1A;KLRK1;RNASE6;FYN;S100A9;GBP5;TYROBP;CSF1R;VIM;NCF2	SLC11A1;S100A9;SYK;CSF1R;LCK;SLA;AIF1;CORO1A;KLRK1;FCER1G;HCK;FGR;PTPN22;TNFAIP3;VIM;RASGRP1;TYROBP;CYBB;TLR2;S100A8;NCF2
GOBP_L_PHENYLALANINE_METABOLIC_PROCESS	1.964	2.099	3.499													2	2	3													QDPR;TAT	QDPR;TAT	TAT;QDPR;HGD
GOBP_STEROL_IMPORT		2.099															2															APOA2;APOC3
GOBP_POSITIVE_REGULATION_OF_TRIGLYCERIDE_CATABOLIC_PROCESS		2.099															2															APOA5;AADAC
GOBP_REGULATION_OF_PROTEOLYSIS	1.571	2.092		1.747		1.566		2.171	1.887		2.21	1.361				11	12		8		7		14	12		11	8				NLRP12;SERPING1;CPB2;HC;SERPINA3N;SERPINA1E;HRG;AMBP;PTPN3;FABP1;STAT3	HRG;AMBP;HC;SERPING1;CPB2;STAT3;FABP1;SERPINA3N;NLRP12;CLU;PTPN3;SERPINA1E		COL6A3;FBLN1;CCBE1;TIMP2;KLF4;THBS1;PCOLCE;ANTXR1		SERPINE1;COL6A3;CCBE1;KLF4;ANTXR1;FBLN1;PCOLCE		CTSB;VSIR;LAPTM5;LGMN;DAB2;KLF4;ARRB2;PYCARD;SYK;S100A9;CD44;LRRK2;CTSH;S100A8	S100A8;S100A9;LGMN;PYCARD;ARRB2;DAB2;LRRK2;SYK;LAPTM5;CTSB;VSIR;KLF4		CYFIP2;SYK;LCK;KLF4;FYN;MBP;S100A8;LAPTM5;S100A9;CD44;TNFAIP8	S100A9;CYFIP2;SYK;MBP;KLF4;LAPTM5;LCK;S100A8
GOBP_RESPONSE_TO_BACTERIUM	1.862	2.092					1.487	6.963	7.896	3.461	2.594	4.73		3.002	3.085	11	11					8	22	22	14	11	14		19	18	HP;HMGCS2;HAMP;ABCA1;MAVS;FAM20A;C4BP;LRG1;CRP;FGB;APOB	ABCA1;FGB;APOB;FAM20A;HP;PCK1;HMGCS2;CRP;HAMP;LRG1;C4BP					KLHL6;PTAFR;TLR2;CYBA;VCAM1;AXL;VIM;IRF8	PTAFR;CFP;FCGR3;PYCARD;SPI1;IRF8;KLHL6;TENT5A;FCER1G;AXL;CYBA;HCK;S100A9;RNASE6;VCAM1;SLC11A1;S100A8;VIM;MRC1;LY86;SYK;CD86	VCAM1;CD55;VIM;S100A9;MRC1;AXL;HCK;FCGR3;PYCARD;SYK;CYBA;CFP;SLC11A1;S100A8;TLR2;FCER1G;IRF8;IL6RA;LY86;FGR;KLHL6;SPI1	RPS19;FCER1G;TLR2;NFKB1;SLC11A1;TNFAIP3;SYK;KLRK1;FGR;LYN;PTGER2;CCR5;PTPN22;VIM	KLRK1;SYK;FCER1G;VIM;FCGR3;RNASE6;PTPN22;S100A8;CCR5;S100A9;GBP5	HCK;PTPN22;SLC11A1;FGR;TNFAIP3;S100A9;VIM;SYK;TLR2;S100A8;KLRK1;PTGER2;CCR5;FCER1G		MRC1;MEF2C;EFNB2;VCAM1;GPM6A;AKAP12;ADAMTS9;STAB2;PLSCR4;SMAD6;SELP;STAB1;PLAC8;VIM;CAV1;EDNRB;TLR4;CFP;FCGR3	CD55;AKAP12;STAB1;MEF2C;PLSCR4;SELP;PLAC8;VIM;TLR4;MRC1;SERPINE1;NOS3;FCGR3;CFP;SMAD6;STAB2;VCAM1;AQP1
GOBP_REGULATION_OF_CHOLESTEROL_METABOLIC_PROCESS	1.938	2.088														3	3														SOD1;EPHX2;APOB	FMO5;APOB;EPHX2
GOBP_POSITIVE_REGULATION_OF_HEART_GROWTH	1.913	2.056														3	3														HAMP;PROX1;ACACB	PROX1;HAMP;ACACB
GOBP_FOAM_CELL_DIFFERENTIATION	1.913	2.056														3	3														CRP;ABCA1;APOB	CRP;APOB;ABCA1
GOBP_RESPONSE_TO_INORGANIC_SUBSTANCE	2.196	2.032			1.512		1.365	1.537	1.505	1.671		1.495				11	10			7		7	10	9	9		7				HP;FGG;HMGCS2;HAMP;HAAO;TAT;CAT;FABP1;SOD1;FGB;APOB	FGB;APOB;HAAO;HP;HMGCS2;FABP1;HAMP;TAT;FGG;ABAT			EDNRB;COL1A1;FOS;FBLN5;MMP2;CRYAB;SOD3		CYBB;ANXA1;SLC40A1;VCAM1;THBS1;AXL;HMOX1	ANXA1;SLC40A1;LGMN;KDM6B;CYBB;UCP2;LRRK2;VCAM1;AXL;S100A8	KDM6B;CYBB;VCAM1;S100A8;LGMN;SLC40A1;AXL;UCP2;LRRK2	CYBB;TNFAIP3;KLF2;ALOX5AP;NCF1;ANXA1;FYN;BCL2;MBP		ALOX5AP;TNFAIP3;KIT;MBP;CYBB;S100A8;KLF2
GOBP_GLUCOSE_METABOLIC_PROCESS		2.032															6															ACACB;NNMT;H6PD;PCK1;GNMT;SDS
GOBP_NEGATIVE_REGULATION_OF_FIBRINOLYSIS	1.898	2.027														2	2														HRG;CPB2	HRG;CPB2
GOBP_VITAMIN_D_BIOSYNTHETIC_PROCESS	1.898	2.027														2	2														CYP3A13;CYP27A1	CYP27A1;CYP3A13
GOBP_NEGATIVE_REGULATION_OF_COMPLEMENT_ACTIVATION	1.898	2.027							2.072							2	2							2							SERPING1;C4BP	SERPING1;C4BP							CD55;VSIG4
GOBP_KETONE_BODY_METABOLIC_PROCESS		2.027															2															SLC27A5;HMGCS2
GOBP_ONE_CARBON_METABOLIC_PROCESS		2.005															3															ALDH1L1;FTCD;GNMT
GOBP_ACYLGLYCEROL_HOMEOSTASIS	1.863	2.005	1.978													3	3	3													MLXIPL;ANGPTL3;ANGPTL4	APOA5;APOC3;ANGPTL4	MLXIPL;ANGPTL3;ANGPTL4
GOBP_GLAND_DEVELOPMENT	3.205	1.996														12	9														CPB2;AR;FGL1;ID2;HMGCS2;ONECUT2;HAMP;BAAT;PTPN3;SRD5A1;PROX1;SOD1	FGL1;SRD5A1;PROX1;PCK1;CPB2;HMGCS2;HAMP;ID2;PTPN3
GOBP_MONOSACCHARIDE_BIOSYNTHETIC_PROCESS		1.966															4															SDS;NNMT;GNMT;PCK1
GOBP_TERPENOID_METABOLIC_PROCESS	2.526	1.966	1.301													5	4	3													CYP3A13;HMGCS2;SRD5A1;ADH4;ALDH1A7	CYP2D10;SRD5A1;HMGCS2;CYP3A13	SRD5A1;HMGCS2;CYP2D10
GOBP_HEME_TRANSPORT		1.958															2															HRG;HPX
GOBP_SEROTONIN_METABOLIC_PROCESS		1.958															2															ALDH2;SRD5A1
GOBP_REGULATION_OF_INTESTINAL_LIPID_ABSORPTION		1.958															2															APOA5;APOA2
GOBP_REGULATION_OF_HUMORAL_IMMUNE_RESPONSE		1.955						1.79	2.925		1.344						3						3	4		2						HPX;SERPING1;C4BP						FCGR3;CD5L;VSIG4	FCGR3;CD55;CD5L;VSIG4		PTPRC;FCGR3
GOBP_CELLULAR_RESPONSE_TO_XENOBIOTIC_STIMULUS	1.307	1.949	3.542													4	5	7													GLYAT;SULT2A7;ACSL1;CYP3A13	CYP2D10;FMO5;CYP3A13;CMBL;AADAC	CYP4A32;ACSL1;EPHX1;CYP2D10;AOX1;GLYAT;AADAC
GOBP_REGULATION_OF_TRIGLYCERIDE_METABOLIC_PROCESS		1.93															3															APOA5;APOC3;AADAC
GOBP_FAT_SOLUBLE_VITAMIN_METABOLIC_PROCESS	1.794	1.93														3	3														CYP3A13;CYP27A1;GC	GC;CYP27A1;CYP3A13
GOBP_PRIMARY_ALCOHOL_METABOLIC_PROCESS	2.477	1.908														5	4														CYP3A13;SULT2A7;ADH4;ALDH1A7;H6PD	H6PD;ALDH2;CYP3A13;CYP2D10
GOBP_REGULATION_OF_DIGESTIVE_SYSTEM_PROCESS		1.903															3															APOA5;HAMP;APOA2
GOBP_NEGATIVE_REGULATION_OF_MACROPHAGE_DERIVED_FOAM_CELL_DIFFERENTIATION	1.779	1.899														2	2														CRP;ABCA1	CRP;ABCA1
GOBP_HIGH_DENSITY_LIPOPROTEIN_PARTICLE_CLEARANCE		1.899															2															APOA2;APOC3
GOBP_NEGATIVE_REGULATION_OF_PROTEIN_AUTOPHOSPHORYLATION	1.779	1.899														2	2														NLRP12;ERRFI1	ERRFI1;NLRP12
GOBP_POSITIVE_REGULATION_OF_LIPID_METABOLIC_PROCESS		1.886	1.385														5	4														APOA2;FABP1;APOA5;AADAC;APOC1	MLXIPL;AADAC;ANGPTL3;FABP1
GOBP_CHEMICAL_HOMEOSTASIS	1.667	1.881					1.395		1.901			1.879				16	16					12		17			13				XPR1;EPHX2;CPB2;MLXIPL;HAMP;ABCA1;PTPN3;LRP6;FAM20A;ANGPTL3;ANGPTL4;STAT3;APOA2;STEAP4;SOD1;APOB	STEAP4;HPX;APOC3;ABCA1;APOB;FAM20A;APOA2;CPB2;ANGPTL4;STAT3;PCK1;EPHX2;HAMP;LRP6;APOA5;PTPN3					PRKCB;CTSH;NPC2;GNAI2;TBXAS1;SLC40A1;FKBP1A;CYBA;SLC31A2;CXCR4;PPT1;HMOX1		TBXAS1;SLC11A1;FPR1;S100A8;CD55;SLC31A2;S100A9;PRKCB;CD52;PPT1;SLC40A1;NPC2;UCP2;LRRK2;CYBA;HK3;GNAI2			FPR1;SLC11A1;CD52;S100A9;HK3;CORO1A;TMC8;PTPRC;LCK;S100A8;PRKCB;PTGER2;CCR5
GOBP_INTRACELLULAR_LIPID_TRANSPORT	1.736	1.861														3	3														ABCA1;SCP2;LRP6	ABCA1;SCP2;LRP6
GOBP_REGULATION_OF_BODY_FLUID_LEVELS	1.345	1.861		2.39	2.002	1.534	1.442	1.84	1.747		1.386		1.4	3.192	3.146	7	8		7	7	5	6	9	8		6		6	15	14	SERPING1;FGG;CPB2;SERPINA1E;HRG;F9;FGB	HRG;FGB;SERPING1;F9;SERPINA1E;CPB2;FGG;ABAT		FBLN1;FLNA;THBS1;CSRP1;COL3A1;PRKG1;EDNRB	EDNRB;PRKG1;FBLN1;FLNA;MYL9;COL3A1;ACTN1	C1QTNF1;ACTN1;SERPINE1;CSRP1;FBLN1	PLEK;GNAI2;CYBA;THBS1;AXL;RAP2B	RAP2B;CYBA;WAS;GNAI2;FCER1G;SYK;MERTK;PLEK;AXL	WAS;RAP2B;FCER1G;AXL;SYK;MERTK;CYBA;GNAI2		FLNA;SYK;PLEK;FCER1G;LCK;PRKCQ		GJA1;CSRP1;VWF;COL3A1;CD34;PDGFB	UGCG;EDNRB;SELP;NPR1;TFPI;GJA5;TLR4;CD34;ACTN1;MMRN1;PAPSS2;PDGFB;COL3A1;CAV1;VWF	GNAI2;VWF;COL3A1;PDGFB;CSRP1;SELP;ACTN1;TLR4;SERPINE1;NOS3;HEG1;C1QTNF1;TFPI;AQP1
GOBP_REGULATION_OF_FATTY_ACID_BIOSYNTHETIC_PROCESS		1.861															3															APOA5;APOC3;APOC1
GOBP_FAT_SOLUBLE_VITAMIN_BIOSYNTHETIC_PROCESS	1.736	1.841														2	2														CYP3A13;CYP27A1	CYP27A1;CYP3A13
GOBP_OPSONIZATION	1.736	1.841														2	2														CRP;C4BP	CRP;C4BP
GOBP_INTERMEMBRANE_LIPID_TRANSFER	1.717	1.839														3	3														APOA2;ABCA1;APOB	ABCA1;APOB;APOA2
GOBP_GLYCEROLIPID_METABOLIC_PROCESS		1.819															8															APOC3;APOB;APOA2;PCK1;SLC27A5;APOA5;AADAC;APOC1
GOBP_LONG_CHAIN_FATTY_ACID_METABOLIC_PROCESS	1.69	1.813	2.578													4	4	5													SLC27A2;ACSL1;CYP3A13;SCP2	CYP2D10;SLC27A5;SCP2;CYP3A13	CYP4A32;ACSL1;CYP2D10;EPHX1;SCP2
GOBP_ELECTRON_TRANSPORT_CHAIN	1.671	1.796														5	5														CYB5A;HAAO;SRD5A1;QDPR;STEAP4	STEAP4;SRD5A1;HAAO;ALDH2;QDPR
GOBP_PRIMARY_AMINO_COMPOUND_METABOLIC_PROCESS		1.796															2															ALDH2;SRD5A1
GOBP_CDC42_PROTEIN_SIGNAL_TRANSDUCTION		1.796															2															ABCA1;APOC3
GOBP_POSITIVE_REGULATION_OF_ORGAN_GROWTH	1.686	1.796														3	3														HAMP;PROX1;ACACB	PROX1;HAMP;ACACB
GOBP_REGULATION_OF_FIBRINOLYSIS	1.692	1.796														2	2														HRG;CPB2	HRG;CPB2
GOBP_NEGATIVE_REGULATION_OF_HOMOTYPIC_CELL_CELL_ADHESION		1.796															2															FGG;ABAT
GOBP_IRON_COORDINATION_ENTITY_TRANSPORT		1.796															2															HRG;HPX
GOBP_NEGATIVE_REGULATION_OF_HUMORAL_IMMUNE_RESPONSE	1.692	1.796						1.711	3.071						1.427	2	2						2	3						2	SERPING1;C4BP	SERPING1;C4BP						FCGR3;VSIG4	FCGR3;CD55;VSIG4						CD55;FCGR3
GOBP_PROTEIN_PROCESSING	1.661	1.792		1.449				1.944								6	6		4				7								HP;FGG;CPB2;LONP2;F9;FGB	LONP2;FGB;F9;HP;CPB2;FGG		CCBE1;THBS1;ADAMTS2;AEBP1				VSIR;LGMN;CD5L;PYCARD;CPM;LRRK2;CTSH
GOBP_REGULATION_OF_PLATELET_ACTIVATION		1.781						1.625		2.745	2.974	2.22		1.812	2.721		3						3		4	4	3		4	5		HRG;FGG;ABAT						FCER1G;PLEK;SYK		PLEK;FCER1G;SYK;LYN	FCER1G;SYK;PRKCQ;PLEK	SYK;FCER1G;PRKCQ		PDGFB;SELP;TLR4;MMRN1	PDGFB;SELP;TLR4;NOS3;C1QTNF1
GOBP_ENDOCYTOSIS		1.778						3.744	4.992			2.129		2.412	2.074		10						16	17			9		17	15		ABCA1;APOC3;AHI1;PRG4;CRP;CLU;LRP6;APOA5;C4BP;APOC1						NCKAP1L;DAB2;MRC1;FCGR3;RAB31;CD5L;ARRB2;PYCARD;FCER1G;SYK;AIF1;LRRK2;ITGB2;AXL;WASF2;PPT1	RAB31;FCGR3;MARCO;MRC1;AIF1;PPT1;FCER1G;AXL;ARRB2;DAB2;MSR1;LRRK2;SYK;NCKAP1L;CD5L;PYCARD;ITGB2			AIF1;ARHGAP25;RAC2;BIN2;SYK;ITGB2;SH3KBP1;RAB31;FCER1G		CDH13;CALCRL;MRC1;CSNK1E;STAB1;ACKR3;EHD2;RAMP2;DAB2;EFNB2;CAV2;ANXA2;FCGR3;CAV1;STAB2;DLL1;APP	STAB1;CD320;DAB2;RAMP2;CDH13;CALCRL;EHD4;CAV2;SERPINE1;FCGR3;ANXA2;DLL1;STAB2;CSNK1E;MRC1
GOBP_ORGANIC_CYCLIC_COMPOUND_CATABOLIC_PROCESS	2.849	1.774	2.468													12	9	10													CYP3A13;EPHX2;ALDH1L1;AMBP;CYP27A1;TAT;A1CF;HAAO;SLCO1B2;SRD5A1;QDPR;ALDH6A1	CYP27A1;AMBP;SRD5A1;HAAO;CYP3A13;EPHX2;QDPR;TAT;ALDH1L1	TAT;TDO2;A1CF;QDPR;HGD;EPHX2;RIDA;HAAO;SRD5A1;ALDH6A1
GOBP_NEGATIVE_REGULATION_OF_CATABOLIC_PROCESS		1.771								1.397							7								6							ACACB;APOC3;APOA2;HP;STAT3;PTPN3;APOC1								PTPN22;SLC11A1;TENT5C;FLNA;FYN;BCL2
GOBP_NEGATIVE_REGULATION_OF_EPITHELIAL_CELL_APOPTOTIC_PROCESS	1.667	1.765												1.787	3.582	3	3												4	6	FGG;ANGPTL4;FGB	FGB;FGG;ANGPTL4												KDR;MAPK7;TEK;RAMP2	MAPK7;RAMP2;SERPINE1;CDH5;ICAM1;KDR
GOBP_CARBOHYDRATE_METABOLIC_PROCESS		1.765															10															IDH1;ACACB;NNMT;GLYCTK;H6PD;ALDH2;STAT3;PCK1;GNMT;SDS
GOBP_PORPHYRIN_CONTAINING_COMPOUND_METABOLIC_PROCESS	1.667	1.765														3	3														ALAS1;SLCO1B2;AMBP	HPX;AMBP;ALAS1
GOBP_INTERLEUKIN_1_PRODUCTION	1.651	1.764						2.186			1.386					4	4						5			3					NLRP12;ERRFI1;ORM2;STAT3	ERRFI1;NLRP12;ORM2;STAT3						ANXA1;ARRB2;IFI205;PYCARD;TYROBP			IFI205;GBP5;TYROBP
GOBP_TRANSITION_METAL_ION_TRANSPORT		1.764															4															HAMP;HRG;HPX;STEAP4
GOBP_POSITIVE_REGULATION_OF_HETEROTYPIC_CELL_CELL_ADHESION	1.667	1.763									1.973					2	2									2					FGG;FGB	FGB;FGG									LCK;CD44
GOBP_NEGATIVE_REGULATION_OF_LIPOPROTEIN_PARTICLE_CLEARANCE		1.763															2															APOC3;APOC1
GOBP_OTIC_VESICLE_DEVELOPMENT	1.667	1.763														2	2														PROX1;AHI1	PROX1;AHI1
GOBP_OXIDATIVE_DEMETHYLATION		1.763															2															CYP3A13;CYP2D10
GOBP_LOW_DENSITY_LIPOPROTEIN_PARTICLE_REMODELING	1.667	1.763														2	2														APOA2;APOB	APOA2;APOB
GOBP_HEPATOCYTE_DIFFERENTIATION		1.763															2															PROX1;PCK1
GOBP_VITAMIN_METABOLIC_PROCESS	1.637	1.747														4	4														VNN1;CYP27A1;CYP3A13;GC	GC;CYP27A1;NNMT;CYP3A13
GOBP_ISOPRENOID_METABOLIC_PROCESS	2.985	1.747	1.764													6	4	4													PHYH;CYP3A13;HMGCS2;SRD5A1;ADH4;ALDH1A7	CYP2D10;SRD5A1;HMGCS2;CYP3A13	SRD5A1;HMGCS2;PHYH;CYP2D10
GOBP_S_ADENOSYLMETHIONINE_METABOLIC_PROCESS	1.637	1.72	1.632													2	2	2													BHMT;GNMT	BHMT;GNMT	GNMT;BHMT
GOBP_METHIONINE_METABOLIC_PROCESS	2.706	1.72	1.632													3	2	2													ADI1;BHMT;GNMT	BHMT;GNMT	GNMT;BHMT
GOBP_POSITIVE_REGULATION_OF_INTERLEUKIN_1_BETA_PRODUCTION	1.623	1.72						1.555			1.97					3	3						3			3					NLRP12;ORM2;STAT3	NLRP12;ORM2;STAT3						PYCARD;TYROBP;IFI205			IFI205;GBP5;TYROBP
GOBP_POSITIVE_REGULATION_OF_RECEPTOR_MEDIATED_ENDOCYTOSIS		1.72				1.374		2.35	2.567								3				2		4	4								APOA5;CLU;AHI1				CD63;SERPINE1		ARRB2;DAB2;SYK;PPT1	ARRB2;DAB2;PPT1;SYK
GOBP_REGULATION_OF_HUMORAL_IMMUNE_RESPONSE_MEDIATED_BY_CIRCULATING_IMMUNOGLOBULIN		1.72							1.745		1.93				1.359		2							2		2				2		HPX;C4BP							FCGR3;CD55		PTPRC;FCGR3				CD55;FCGR3
GOBP_HEMOGLOBIN_METABOLIC_PROCESS	1.637	1.72														2	2														ALAS1;CAT	HPX;ALAS1
GOBP_RESPONSE_TO_STEROID_HORMONE	1.963	1.7					2.627			2.716		1.825				8	7					8			9		6				GHR;AR;HMGCS2;ERRFI1;TAT;SRD5A1;APOA2;IDH1	ERRFI1;IDH1;SRD5A1;APOA2;PCK1;HMGCS2;TAT					IL1RN;CYBB;PTAFR;ANXA1;SGK1;TLR2;THBS1;CYBA			TLR2;RPL27;CYBB;ANXA1;SGK1;PTGER2;AIF1;BCL2;MBP		AIF1;SGK1;CYBB;MBP;TLR2;PTGER2
GOBP_PHOSPHOLIPID_CATABOLIC_PROCESS	1.609	1.7														3	3														APOA2;ANGPTL3;IDH1	IDH1;APOA2;APOC1
GOBP_ORGANOPHOSPHATE_METABOLIC_PROCESS	1.765	1.692	2.038													14	13	13													MLXIPL;HMGCS2;SULT2A7;ACACB;BAAT;HAAO;AASS;GLYAT;ACSL1;ANGPTL3;STAT3;APOA2;IDH1;H6PD	IDH1;ACACB;NNMT;AASS;GLYCTK;HAAO;H6PD;APOA2;STAT3;HMGCS2;APOA5;ATP5J;APOC1	AASS;TDO2;HMGCS2;GLYCTK;ACSL1;NADK2;MLXIPL;STAT3;BAAT;HAAO;GLYAT;ANGPTL3;H6PD
GOBP_RECEPTOR_MEDIATED_ENDOCYTOSIS		1.692						2.913	4.701					4.427	3.049		6						9	11					14	11		APOC3;AHI1;CLU;LRP6;APOA5;APOC1						DAB2;MRC1;FCGR3;RAB31;ARRB2;FCER1G;SYK;ITGB2;PPT1	RAB31;FCGR3;MARCO;MRC1;PPT1;FCER1G;ARRB2;DAB2;MSR1;SYK;ITGB2					CALCRL;MRC1;STAB1;ACKR3;RAMP2;DAB2;EFNB2;CAV2;ANXA2;FCGR3;CAV1;STAB2;DLL1;APP	STAB1;RAMP2;DAB2;CALCRL;CAV2;SERPINE1;FCGR3;ANXA2;DLL1;STAB2;MRC1
GOBP_WOUND_HEALING		1.691	1.456	4.165	3.384	3.702	1.718	2.498	1.567	3.148	2.093	1.899	1.629	2.846	3.758		8	7	10	10	9	7	11	8	11	8	7	7	15	16		HRG;FGB;SERPING1;F9;SERPINA1E;CPB2;FGG;ABAT	CYP4A32;F9;DST;SERPINA1E;ERBB3;KLKB1;ABAT	FBLN1;COL1A1;FLNA;ACTA2;THBS1;TPM1;COL5A1;CSRP1;COL3A1;PRKG1	COL1A1;PRKG1;FBLN1;FLNA;TPM1;MYL9;ACTA2;COL3A1;COL5A1;ACTN1	MCAM;C1QTNF1;ACTN1;SERPINE1;COL5A1;CSRP1;COL1A1;TPM1;FBLN1	PLEK;THBS1;ANXA1;HMOX1;AXL;RAP2B;CXCR4	ANXA1;RAP2B;WAS;FCER1G;SYK;MERTK;PLEK;CD44;AXL;SLC11A1;S100A8	WAS;SLC11A1;S100A8;RAP2B;FCER1G;AXL;SYK;MERTK	CD44;FCER1G;SLC11A1;TNFAIP3;SYK;LYN;ANXA1;CXCR4;PLEK;FLNA;PABPC4	FLNA;SYK;PLEK;FCER1G;LCK;PRKCQ;S100A8;CD44	SLC11A1;PRKCQ;TNFAIP3;SYK;LCK;S100A8;FCER1G	CSRP1;VWF;ACVRL1;ANXA1;CD34;COL3A1;PDGFB	ACVRL1;SELP;KDR;TFPI;PRCP;ELK3;TLR4;CD34;ACTN1;MMRN1;PAPSS2;PDGFB;COL3A1;CAV1;VWF	VWF;ITGA5;COL3A1;PDGFB;CSRP1;SELP;ACTN1;TLR4;PRCP;SERPINE1;NOS3;MCAM;ACVRL1;C1QTNF1;TFPI;KDR
GOBP_REGULATION_OF_COMPLEMENT_ACTIVATION	1.609	1.685						1.585	2.867							2	2						2	3							SERPING1;C4BP	SERPING1;C4BP						CD5L;VSIG4	CD55;CD5L;VSIG4
GOBP_NADPH_REGENERATION	1.609	1.685														2	2														ALDH1L1;H6PD	H6PD;ALDH1L1
GOBP_PROTEIN_ACTIVATION_CASCADE	1.609	1.685														2	2														FGG;FGB	FGB;FGG
GOBP_RESPONSE_TO_OXYGEN_CONTAINING_COMPOUND	2.812	1.685		3.173	3.812	2.734	3.593	6.106	6.917	6.122	3.408	4.56	2.815	2.778	5.281	24	19		17	21	15	22	35	34	31	22	23	20	35	40	AR;MLXIPL;SRD5A1;ABCA1;SOD1;ALDH1A7;TAT;ADH4;GRB14;GHR;LRP6;CAT;APOA2;APOB;HP;H6PD;CPB2;HMGCS2;HAMP;ERRFI1;FABP1;ACSL1;STAT3;MGST1	ERRFI1;GRB14;ABCA1;APOB;APOA2;STAT3;HMGCS2;FABP1;MGST1;SRD5A1;HP;CPB2;PCK1;HAMP;CLU;ABAT;H6PD;TAT;LRP6		COL1A1;MMP2;IGFBP7;COL6A2;FLNA;FBN1;COL1A2;KLF4;COL6A1;IGFBP5;THBS1;FBLN5;TPM1;VIM;COL3A1;COL4A1;EDNRB	EDNRB;SFRP1;FBLN5;FLNA;MMP2;FBN1;SOD3;COL3A1;IGFBP5;COL1A1;COL1A2;IGFBP7;TPM1;COL6A1;RGS4;VIM;FOS;KLF4;TBX2;COL6A2;CRYAB	IGFBP5;COL1A2;FBN1;COL6A2;RGS4;COL6A1;SERPINE1;SOD3;AGTR1A;TBX2;VIM;IGFBP7;KLF4;COL1A1;TPM1	ARPC1B;RGS10;SGK1;TBXAS1;CYBA;VIM;CTSH;ANXA1;TLR2;VCAM1;IRF8;PRKCB;CYBB;NAMPT;PKM;PTAFR;GNAI2;HMOX1;AXL;THBS1;KLF4;RAB31	PTAFR;KLF4;RGS10;FCGR3;UCP2;PYCARD;SPI1;IRF8;PKM;ARPC1B;ARRB2;AIF1;NAMPT;LRRK2;AXL;CTSH;ANXA1;FOLR2;KDM6B;RAB31;GNAI2;CYBA;HCK;S100A9;VCAM1;SLC11A1;S100A8;TBXAS1;VIM;LGMN;MRC1;CYBB;LY86;CD86;PRKCB	TBXAS1;VCAM1;CD55;VIM;S100A9;MRC1;AXL;ARRB2;HCK;GNAI2;FCGR3;AIF1;PYCARD;PKM;LRRK2;CYBA;ARPC1B;RGS10;RAB31;KDM6B;SLC11A1;S100A8;PRKCB;NAMPT;TLR2;LGMN;IRF8;SGK1;FOLR2;LY86;CYBB;UCP2;KLF4;SPI1	TLR2;NFKB1;CYBB;SGK1;PTPN22;AIF1;BCL2;MBP;BTG2;TNFAIP3;BTG1;PIP4K2A;KLF2;LEPROTL1;ANXA1;FLNA;VIM;RPL27;SESN1;GNG2;ATM;NCF1;KLRK1;LYN;PTGER2;CCR5;FYN;SLC11A1;RAB31;PRKCB;KLF4	KLF2;FCGR3;PTPN22;S100A8;GNG2;CCR5;AIF1;CYBB;PRKCB;SESN1;PRKCQ;PIP4K2A;KLRK1;FLNA;KLF4;FYN;MBP;S100A9;BCL2;RAB31;VIM;ATM	SLC11A1;PRKCQ;S100A9;RAB31;AIF1;GNG2;PIP4K2A;KLF4;SGK1;KLRK1;PRKCB;HCK;PTGER2;CCR5;KLF2;PTPN22;ATM;TNFAIP3;VIM;MBP;CYBB;TLR2;S100A8	GJA1;KLF4;ICAM1;COL3A1;APP;NAMPT;GRB10;IGFBP7;ANGPT2;SOGA1;COL6A2;TIE1;PALM;SGK1;COL4A1;VIM;ADAM15;SMAD6;ANXA1;PDGFB	MRC1;ADAM15;MEF2C;NAMPT;TGFBR3;EFNB2;VCAM1;KLF7;PDGFB;AKAP12;KLF4;IGFBP7;COL3A1;CAV2;POSTN;RPS6KA2;PCGF2;PLSCR4;SMAD6;APP;SELP;CALCRL;TIE1;COL6A2;GRB10;VIM;CAV1;EDNRB;KLF2;KDM6B;CLDN5;MAPK7;TLR4;FCGR3;PALM	NAMPT;KLF7;CALCRL;PXN;CLDN5;MYO1C;ADAM15;SMAD6;MRC1;MEF2C;MAPK7;PDGFB;SELP;POSTN;AQP1;LGMN;RPS6KA2;TGFBR3;CAV2;SERPINE1;NOS3;SGK1;ICAM1;VCAM1;PLSCR4;CD55;AKAP12;GNAI2;SOGA1;KDM6B;KLF2;TLR4;VIM;TIE1;FCGR3;NASP;IGFBP7;COL6A2;COL3A1;KLF4
GOBP_ASPARTATE_FAMILY_AMINO_ACID_CATABOLIC_PROCESS		1.685	1.596														2	2														SDS;AASS	AASS;RIDA
GOBP_2_OXOGLUTARATE_METABOLIC_PROCESS	2.638	1.685	1.596													3	2	2													PHYH;IDH1;TAT	IDH1;TAT	TAT;PHYH
GOBP_NEGATIVE_REGULATION_OF_MULTICELLULAR_ORGANISMAL_PROCESS		1.684		2.535	1.35	1.979	3.565	4.073	4.964	4.361	2.982	3.065	4.078	4.242	5.457		14		12	10	10	17	23	23	21	16	15	18	30	31		ERRFI1;HRG;FGB;SERPING1;APOC3;APOA2;ORM2;ABAT;CPB2;HAMP;NLRP12;ID2;FGG;APOC1		COL4A2;THBS2;MMP2;FBN1;SPARC;KLF4;IGFBP5;THBS1;THY1;SEMA5A;ADAMTS1;PRKG1	SFRP1;KLF4;SEMA5A;SPARC;RGS4;MMP2;THY1;FBN1;IGFBP5;PRKG1	IGFBP5;FBN1;SPARC;THY1;C1QTNF1;RGS4;THBS2;SERPINE1;ADAMTS1;KLF4	CD83;C1QC;FGL2;LAPTM5;ANXA1;TLR2;IFNGR1;GNAI2;CD84;CYBA;THBS1;AXL;TYROBP;NCKAP1L;KLF4;HMOX1;VSIR	VSIR;KLF4;FCGR3;FGL2;PYCARD;SPI1;C1QC;VSIG4;MERTK;LAPTM5;ARRB2;AXL;ANXA1;IFNGR1;NCKAP1L;CD83;GNAI2;CYBA;CD84;SLC11A1;LGMN;JARID2;TYROBP	AXL;ARRB2;NCKAP1L;IFNGR1;GNAI2;JARID2;FCGR3;PYCARD;CYBA;SLC11A1;TLR2;LGMN;C1QC;REL;TYROBP;FGL2;MERTK;LAPTM5;VSIG4;VSIR;KLF4;CD84;SPI1	TLR2;NFKB1;LAPTM5;PTPN22;EVL;BCL2;JARID2;MBP;TYROBP;TNFAIP3;KLF2;FGL2;ANXA1;CD83;ARHGDIB;LYN;SEMA4D;RPS19;PTPRC;SLC11A1;KLF4	EVL;SRGN;CD83;JARID2;KLF2;FCGR3;KLF4;FGL2;ARHGDIB;SEMA4D;MBP;PTPN22;PTPRC;LAPTM5;BCL2;TYROBP	PTPN22;SLC11A1;ARHGDIB;TNFAIP3;FGL2;KLF4;TYROBP;TLR2;LAPTM5;EVL;PTPRC;MBP;JARID2;KLF2;SEMA4D	ANGPT2;COL4A2;SPRY1;VASH1;BMP4;GJA1;KLF4;DLL1;ACVRL1;PDGFB;ADAMTS9;SPARC;HDAC7;SMAD6;ANXA1;CD34;TIE1;SOX17	ACVRL1;MMRN2;MEF2C;KLF7;PDGFB;DLL1;BMP4;CHSY1;KLF4;GJA5;ADAMTS9;SMAD6;NPR1;CALCRL;TFPI;STAB1;SKI;PLAC8;TIE1;PTPRM;YBX3;SPARC;SEMA6A;KLF2;CLDN5;TLR4;TEK;FCGR3;HDAC7;CD34	CALCRL;ECM1;KLF7;PLAC8;CLDN5;SMAD6;ACVRL1;C1QTNF1;MEF2C;STAB1;SPARC;PDGFB;SEMA6A;CHSY1;DLL1;PTPRM;LGMN;SERPINE1;NOS3;JAM2;MMRN2;ADAMTS1;GNAI2;SOX17;SEMA3F;KLF2;TLR4;TIE1;FCGR3;TFPI;KLF4
GOBP_NEGATIVE_REGULATION_OF_CELLULAR_CATABOLIC_PROCESS		1.673															6															ACACB;APOC3;HP;STAT3;PTPN3;APOC1
GOBP_EPITHELIAL_CELL_PROLIFERATION	1.537	1.673		2.197	2.307	1.868							2.029	5.344	3.714	8	8		7	8	6							8	20	16	CPB2;AR;FGL1;ID2;ERRFI1;LRG1;STAT3;PROX1	ERRFI1;FGL1;FST;PROX1;CPB2;STAT3;ID2;LRG1		LAMC1;SPARC;IGFBP5;THBS1;SEMA5A;LAMB1;EDNRB	EDNRB;LAMC1;SFRP1;LAMB1;TBX2;SPARC;SEMA5A;IGFBP5	IGFBP5;LAMC1;SPARC;AGTR1A;TBX2;LAMB1							VASH1;BMP4;PDGFB;SPARC;ACVRL1;CD34;COL8A1;TIE1	ACVRL1;MMRN2;MEF2C;TGFBR3;COL8A1;EFNB2;PDGFB;BMP4;EGFL7;CAV2;KDR;CDH13;TIE1;PTPRM;DAB2;SPARC;CAV1;EDNRB;TEK;CD34	FLT4;MEF2C;DAB2;SPARC;CDH13;PDGFB;EGFL7;ECM1;TGFBR3;TIE1;CAV2;FLT1;PTPRM;ACVRL1;MMRN2;KDR
GOBP_POLYOL_METABOLIC_PROCESS	1.551	1.649						1.427								4	4						4								CYP3A13;ANGPTL3;QDPR;CYP27A1	CYP27A1;QDPR;PCK1;CYP3A13						PTAFR;GK;PLEK;ASAH1
GOBP_CELLULAR_RESPONSE_TO_LEPTIN_STIMULUS	1.572	1.648														2	2														FGB;STAT3	FGB;STAT3
GOBP_AMINO_ACID_BETAINE_METABOLIC_PROCESS		1.648	1.562														2	2														BHMT;ALDH7A1	ALDH7A1;BHMT
GOBP_NEGATIVE_REGULATION_OF_FATTY_ACID_BIOSYNTHETIC_PROCESS		1.648															2															APOC3;APOC1
GOBP_TETRAHYDROFOLATE_METABOLIC_PROCESS		1.648															2															ALDH1L1;FTCD
GOBP_REGULATION_OF_DNA_BINDING_TRANSCRIPTION_FACTOR_ACTIVITY	2.245	1.642	1.814				1.676	1.971	3.955	2.083	2.497	5.455				10	8	8				7	10	13	9	9	13				IL1RAP;NLRP12;AR;CAMK1D;ID2;MAVS;LRP6;CAT;STAT3;PROX1	PROX1;IL1RAP;STAT3;CAMK1D;NLRP12;ID2;CLU;LRP6	NLRP12;LRP6;CAT;ID2;STAT3;IL1RAP;MAVS;CAMK1D				PRKCB;SGK1;TLR2;NFAM1;HCLS1;HMOX1;KLF4	NFAM1;KLF4;ARRB2;PYCARD;SPI1;HCK;S100A9;SYK;S100A8;PRKCB	S100A8;NFAM1;PRKCB;S100A9;TLR2;HCLS1;PYCARD;ARRB2;SGK1;SYK;HCK;KLF4;SPI1	TLR2;TNFAIP3;PRKCH;SYK;HCLS1;SGK1;PRKCB;FLNA;KLF4	KIT;PRKCB;FLNA;SYK;KLF4;PRKCQ;S100A8;S100A9;PRKCH	HCK;PRKCQ;TNFAIP3;S100A9;SYK;KIT;PRKCH;KLF4;SGK1;TLR2;S100A8;PRKCB;HCLS1
GOBP_NEGATIVE_REGULATION_OF_LIPID_BIOSYNTHETIC_PROCESS		1.642															3															PROX1;APOC3;APOC1
GOBP_REGULATION_OF_VESICLE_MEDIATED_TRANSPORT		1.642					3.584	7.846	8.925	3.979	1.648	4.653					9					12	22	22	14	8	13					FGB;APOC3;AHI1;APOA2;CAMK1D;CLU;APOA5;FGG;APOC1					PRKCB;PTAFR;ANXA1;TLR2;GNAI2;CD84;CYBA;NCKAP1L;AXL;RAB31;PPT1;HMOX1	PTAFR;FCGR3;PYCARD;SPI1;MERTK;ARRB2;FCER1G;LRRK2;AXL;PPT1;ANXA1;NCKAP1L;RAB31;GNAI2;CYBA;HCK;CD84;SLC11A1;DAB2;SYK;ITGB2;PRKCB	AXL;ARRB2;DAB2;NCKAP1L;HCK;GNAI2;FCGR3;PYCARD;LRRK2;SYK;CYBA;RAB31;SLC11A1;PRKCB;TLR2;PPT1;FCER1G;ITGB2;FGR;MERTK;CD84;SPI1	TLR2;FCER1G;IL2RB;PTPRC;SLC11A1;CORO1A;RAC2;SYK;ITGB2;RAB31;FGR;ANXA1;LYN;PRKCB	PRKCB;CORO1A;SYK;FCER1G;RAB31;FCGR3;IL2RB;PTPRC	FGR;HCK;SLC11A1;RAC2;SYK;ITGB2;CORO1A;IL2RB;TLR2;PTPRC;PRKCB;RAB31;FCER1G
GOBP_RESPONSE_TO_METAL_ION	1.873	1.633														8	7														FGG;HMGCS2;HAMP;TAT;HAAO;CAT;SOD1;FGB	FGB;HAAO;HMGCS2;HAMP;TAT;FGG;ABAT
GOBP_NEGATIVE_REGULATION_OF_PLATELET_ACTIVATION		1.61													2.09		2													3		FGG;ABAT													NOS3;C1QTNF1;PDGFB
GOBP_RESPONSE_TO_HORMONE	2.764	1.6		1.768	1.719		4.937	1.9	2.395	4.472	1.416	2.898	1.767	1.729	2.056	16	12		9	10		18	15	15	19	10	13	11	19	19	GRB14;GHR;AR;HMGCS2;ERRFI1;TAT;LRP6;CAT;ACSL1;SRD5A1;ANGPTL3;STAT3;APOA2;IDH1;FGB;APOB	ERRFI1;GRB14;IDH1;FGB;SRD5A1;APOB;APOA2;STAT3;PCK1;HMGCS2;TAT;LRP6		COL1A1;MMP2;IGFBP7;FBN1;TIMP2;IGFBP5;THBS1;COL3A1;EDNRB	EDNRB;COL1A1;SFRP1;FOS;MMP2;IGFBP7;FBN1;COL3A1;IGFBP5;TIMP2		ARPC1B;PRKCB;CTSH;IL1RN;CTSB;CYBB;NAMPT;PKM;ANXA1;SGK1;TLR2;GNAI2;PTAFR;HCLS1;THBS1;CYBA;RAB31;HMOX1	ANXA1;PTAFR;CTSB;ARPC1B;PKM;DAB2;RAB31;GNAI2;CYBB;UCP2;CYBA;AIF1;NAMPT;CTSH;PRKCB	RAB31;CYBB;AIF1;PRKCB;NAMPT;TLR2;HCLS1;UCP2;DAB2;PKM;SGK1;CYBA;ARPC1B;CTSB;GNAI2	TLR2;NFKB1;CYBB;SGK1;AIF1;BCL2;MBP;BTG2;BTG1;PIP4K2A;LEPROTL1;ANXA1;RPL27;GNG2;HCLS1;LYN;PTGER2;RAB31;PRKCB	KIT;CYBB;PRKCB;RAB31;PRKCQ;MBP;GNG2;PIP4K2A;AIF1;BCL2	AIF1;GNG2;PRKCQ;PIP4K2A;KIT;SGK1;CYBB;TLR2;MBP;PRKCB;PTGER2;HCLS1;RAB31	SGK1;NAMPT;BMP4;SOGA1;GRB10;IGFBP7;TIMP2;SMAD6;ANXA1;LMO2;COL3A1	UGCG;MEF2C;NAMPT;TGFBR3;BMP4;COL3A1;IGFBP7;CAV2;LMO2;SMAD6;TFPI;PRCP;RAMP2;DAB2;GRB10;CAV1;TIMP2;EDNRB;PLPP1	NAMPT;PXN;SMAD6;MYO1C;MEF2C;COL3A1;PRCP;AQP1;RAMP2;ENG;TGFBR3;CAV2;NOS3;SGK1;GNAI2;DAB2;SOGA1;IGFBP7;TFPI
GOBP_POSITIVE_REGULATION_OF_CYTOKINE_PRODUCTION	1.476	1.594					5.425	7.641	7.803	6.82	9.683	10.405				8	8					14	20	19	17	19	19				IL1RAP;NLRP12;HC;MAVS;ORM2;STAT3;APOA2;SOD1	HC;APOA2;ORM2;IL1RAP;STAT3;NLRP12;CLU;KPNA6					CD83;CYBB;LAPTM5;PTAFR;ANXA1;TLR2;IFNGR1;CD84;NFAM1;THBS1;CYBA;TYROBP;IRF8;HMOX1	PTAFR;CSF1R;PYCARD;IRF8;LAPTM5;IFI205;FCER1G;AIF1;LRRK2;ANXA1;IFNGR1;CD83;CYBA;CD84;SLC11A1;NFAM1;CYBB;SYK;TYROBP;CD86	CD55;IFNGR1;AIF1;PYCARD;LRRK2;SYK;CYBA;SLC11A1;NFAM1;TLR2;FCER1G;IRF8;IL6RA;CYBB;FGR;CSF1R;TYROBP;LAPTM5;CD84	TLR2;CSF1R;FCER1G;PTPRC;SLC11A1;CYBB;TYROBP;SASH3;SYK;LAPTM5;KLRK1;FGR;ANXA1;CD83;PTPN22;AIF1;MBP	KIT;CD83;SYK;FCER1G;IFI205;PTPN22;AIF1;RASGRP1;CYBB;PRKCQ;LAPTM5;KLRK1;SASH3;LTB;MBP;PTPRC;GBP5;TYROBP;CSF1R	SLC11A1;PRKCQ;SYK;CSF1R;LAPTM5;AIF1;KLRK1;LTB;FCER1G;FGR;KIT;SASH3;PTPN22;RASGRP1;TYROBP;CYBB;TLR2;MBP;PTPRC
GOBP_POSITIVE_REGULATION_OF_INTERLEUKIN_1_PRODUCTION	1.509	1.588						1.425			1.838					3	3						3			3					NLRP12;ORM2;STAT3	NLRP12;ORM2;STAT3						PYCARD;TYROBP;IFI205			IFI205;GBP5;TYROBP
GOBP_RESPONSE_TO_KETONE	1.489	1.587					2.496			3.49	1.349	3.517			2.141	5	5					6			8	4	7			8	AR;HMGCS2;ERRFI1;TAT;SRD5A1	ERRFI1;SRD5A1;PCK1;HMGCS2;TAT					CYBB;PTAFR;SGK1;TLR2;THBS1;CYBA			TLR2;RPL27;CYBB;GNG2;KLF2;SGK1;PTGER2;MBP	KLF2;GNG2;CYBB;MBP	GNG2;SGK1;CYBB;MBP;TLR2;PTGER2;KLF2			TGFBR3;KLF2;POSTN;NASP;SGK1;ADAM15;IGFBP7;AQP1
GOBP_CELLULAR_IRON_ION_HOMEOSTASIS	1.5	1.587														3	3														HAMP;STEAP4;SOD1	HAMP;HPX;STEAP4
GOBP_TETRAPYRROLE_METABOLIC_PROCESS	1.5	1.587														3	3														ALAS1;SLCO1B2;AMBP	HPX;AMBP;ALAS1
GOBP_PROTEIN_TRANSMEMBRANE_TRANSPORT		1.587															3															LONP2;ABCA1;AZGP1
GOBP_LIPID_DIGESTION		1.587															2															APOA5;APOA2
GOBP_XENOBIOTIC_CATABOLIC_PROCESS	1.509	1.587	1.517													2	2	2													ACSL1;CYP3A13	CYP3A13;CYP2D10	ACSL1;CYP2D10
GOBP_INTESTINAL_LIPID_ABSORPTION		1.587															2															APOA5;APOA2
GOBP_KILLING_BY_HOST_OF_SYMBIONT_CELLS		1.587															2															HRG;CFHR1
GOBP_REGULATION_OF_CATECHOLAMINE_METABOLIC_PROCESS		1.587															2															ALDH2;ABAT
GOBP_ENDOTHELIAL_CELL_APOPTOTIC_PROCESS	1.5	1.587												1.563	3.139	3	3												4	6	FGG;ANGPTL4;FGB	FGB;FGG;ANGPTL4												KDR;MAPK7;TEK;RAMP2	MAPK7;RAMP2;SERPINE1;CDH5;ICAM1;KDR
GOBP_RESPONSE_TO_GLUCAGON		1.587	1.517														2	2														HMGCS2;PCK1	HMGCS2;PCK1
GOBP_CHOLESTEROL_STORAGE	1.509	1.587														2	2														ABCA1;APOB	ABCA1;APOB
GOBP_VITAMIN_BIOSYNTHETIC_PROCESS	1.509	1.587														2	2														CYP3A13;CYP27A1	CYP27A1;CYP3A13
GOBP_STEROL_BIOSYNTHETIC_PROCESS	2.133	1.569														4	3														HMGCS2;SOD1;MSMO1;APOB	APOA5;APOB;HMGCS2
GOBP_POSITIVE_REGULATION_OF_DEVELOPMENTAL_PROCESS	1.609	1.561					3.789	2.415	1.804	3.11	2.816	2.575	2.926	1.711	4.376	17	16					20	22	18	21	18	16	18	26	33	IL1RAP;GHR;FGG;VNN1;AR;HC;ID2;AHI1;HAMP;ACACB;LRG1;ANGPTL3;ANGPTL4;STAT3;PROX1;FGB;APOB	FST;ACACB;HC;AHI1;FGB;PROX1;APOB;STAT3;ANGPTL4;PCK1;IL1RAP;FBXO31;HAMP;ID2;LRG1;FGG					TYROBP;CTSH;ANXA1;TLR2;GLIPR2;HCLS1;PRKCB;CD83;CYBB;PKM;THBS1;AXL;NCKAP1L;HMOX1;KLF4;PREX1;BASP1;CXCR4;LIMS1;VSIR	VSIR;KLF4;PKM;ARRB2;TENT5A;AXL;CTSH;ANXA1;NCKAP1L;BASP1;CD83;GLIPR2;DAB2;CYBB;LIMS1;PREX1;SYK;TYROBP;METRNL;ZEB2;CD86;PRKCB	CYBB;PRKCB;TLR2;BASP1;HCLS1;TYROBP;AXL;ARRB2;DAB2;PKM;MSR1;SYK;NCKAP1L;PREX1;IL6RA;ZEB2;VSIR;KLF4	TLR2;ETS1;NFKB1;CYBB;CXCR4;BCL2;TYROBP;BTG1;ANXA1;CD83;FLNA;PRKCH;SASH3;SYK;HCLS1;LYN;SEMA4D;PTPRC;CD53;PRKCB;KLF4	ETS1;KIT;CD83;RASGRP1;CYBB;PRKCB;BCL2;FLNA;SYK;KLF4;SEMA4D;ZEB2;PTPRC;PRKCH;CD53;TOX;TYROBP;SASH3	SYK;RASGRP1;KIT;PRKCH;CD53;KLF4;CYBB;TYROBP;TLR2;SASH3;PTPRC;PRKCB;HCLS1;ZEB2;TOX;SEMA4D	PTGIS;ANGPT2;SPRY1;EHD2;BMP4;CEBPD;GJA1;KLF4;DLL1;TIAM1;PDGFB;ADAMTS9;ACVRL1;ANXA1;NEDD9;CD34;TIE1;SOX17	TAL1;ACVRL1;MMRN2;MEF2C;TGFBR3;EFNB2;TIAM1;PDGFB;DLL1;BMP4;RELN;KLF4;KDR;ADAMTS9;CSNK1E;RAMP2;TIE1;DAB2;ZEB2;YBX3;IGFBP3;CLDN5;PTGIS;EHD2;TEK;CD34	ECM1;PLXND1;PTGIS;IGFBP3;CLDN5;ACVRL1;RELN;MEF2C;PDGFB;DLL1;CSNK1E;AQP1;WWTR1;ITGA5;RAMP2;ENG;TGFBR3;TCF4;SERPINE1;NOS3;FLT1;KDR;DAB2;TAL1;SOX17;ZEB2;CEBPD;TIE1;CDH5;SHANK3;NEDD9;MMRN2;KLF4
GOBP_ASPARTATE_FAMILY_AMINO_ACID_BIOSYNTHETIC_PROCESS	2.424	1.553	1.489													3	2	2													ADI1;AASS;BHMT	BHMT;AASS	AASS;BHMT
GOBP_NEGATIVE_REGULATION_OF_LIPID_STORAGE	1.489	1.553														2	2														CRP;ABCA1	CRP;ABCA1
GOBP_POSITIVE_REGULATION_OF_GENE_EXPRESSION	1.873	1.547	1.307				4.671	7.092	6.13	4.531	7.028	6.564	1.524		1.907	16	14	12				20	30	26	22	24	22	12		22	IL1RAP;NLRP12;APOA2;PHF8;AR;EPHX2;HC;ID2;MAVS;A1CF;NOS1AP;STAT3;CRP;ORM2;SOD1;APOB	HPX;HC;NOS1AP;APOB;APOA2;ORM2;STAT3;EPHX2;IL1RAP;CRP;NLRP12;ID2;CLU;KPNA6	PHF8;RIOK3;NLRP12;A1CF;ERBB3;ID2;STAT3;EPHX2;MAVS;IL1RAP;KLKB1;HC				CYBA;VIM;TYROBP;CTSH;ANXA1;TLR2;CD84;IRF8;CD83;CYBB;PKM;PTAFR;IFNGR1;THBS1;HMOX1;KLF4;LAPTM5;NFAM1;LIMS1;VSIR	PTAFR;VSIR;KLF4;CSF1R;PYCARD;SPI1;IRF8;LAPTM5;PKM;MAF;ARRB2;IFI205;TENT5A;FCER1G;AIF1;LRRK2;CTSH;ANXA1;IFNGR1;CD83;CYBA;CD84;SLC11A1;VIM;NFAM1;CYBB;LIMS1;SYK;TYROBP;CD86	CD55;VIM;ARRB2;IFNGR1;MAF;AIF1;PYCARD;PKM;LRRK2;SYK;CYBA;SLC11A1;NFAM1;TLR2;FCER1G;IRF8;IL6RA;CYBB;FGR;CSF1R;TYROBP;LAPTM5;VSIR;KLF4;CD84;SPI1	TLR2;ETS1;CYBB;LAPTM5;FGR;PTPN22;AIF1;MBP;CSF1R;TYROBP;ANXA1;CD83;VIM;SASH3;SYK;ATM;KLRK1;FCER1G;PTPRC;SLC11A1;TENT5C;KLF4	ETS1;KIT;CD83;MAF;SYK;FCER1G;IFI205;PTPN22;AIF1;RASGRP1;CYBB;PRKCQ;LAPTM5;KLRK1;SASH3;LTB;KLF4;MBP;PTPRC;GBP5;TYROBP;CSF1R;VIM;ATM	SLC11A1;PRKCQ;SYK;CSF1R;LAPTM5;AIF1;KLF4;KLRK1;LTB;FCER1G;FGR;KIT;SASH3;PTPN22;ATM;VIM;RASGRP1;TYROBP;CYBB;TLR2;MBP;PTPRC	BMP4;VIM;ANXA2;GJA1;KLF4;DLL1;PDGFB;ANXA1;CD34;APP;IL33;SOX17		HEG1;CLDN5;ANXA2;C1QTNF1;MEF2C;PDGFB;DLL1;IL33;MAF;FLT4;RAMP2;ENG;RPS6KA2;SERPINE1;NOS3;CD55;AKAP12;SOX17;VIM;TLR4;CDH5;KLF4
GOBP_CELLULAR_RESPONSE_TO_LIPID		1.546						2.54	3.03	2.77		2.744			1.614		9						13	13	12		10			13		MGST1;ERRFI1;ABCA1;SRD5A1;PCK1;HMGCS2;HAMP;CLU;LRP6						ANXA1;PTAFR;VIM;MRC1;DAB2;PYCARD;SPI1;LY86;HCK;SYK;IRF8;AXL;CD86	LY86;CD55;VIM;MRC1;TLR2;AXL;PYCARD;DAB2;IRF8;SGK1;SYK;HCK;SPI1	TLR2;NFKB1;TNFAIP3;SYK;ATM;KLRK1;LYN;ANXA1;SGK1;CCR5;PTPN22;VIM		HCK;PTPN22;ATM;TNFAIP3;VIM;SYK;SGK1;TLR2;KLRK1;CCR5			CD55;MEF2C;DAB2;PLSCR4;VIM;TLR4;MRC1;SERPINE1;NOS3;SGK1;ADAM15;TFPI;AQP1
GOBP_LONG_CHAIN_FATTY_ACID_TRANSPORT	2.089	1.521	1.517													4	3	3													SLC27A2;ACSL1;PLIN2;FABP1	PLIN2;SLC27A5;FABP1	PLIN2;ACSL1;FABP1
GOBP_POSITIVE_REGULATION_OF_CYTOKINE_PRODUCTION_INVOLVED_IN_INFLAMMATORY_RESPONSE		1.52															2															STAT3;KPNA6
GOBP_RESPONSE_TO_LEPTIN	1.463	1.52														2	2														FGB;STAT3	FGB;STAT3
GOBP_PROTEOLYSIS		1.509		1.555													19		13													STAT3;FABP1;FBXO31;UBR4;HRG;HP;CPB2;SERPINA3N;CLU;PTPN3;SERPINA1E;SERPING1;AMBP;FGG;LONP2;FGB;HC;F9;NLRP12		COL6A3;FBLN1;MMP2;CCBE1;AEBP1;TIMP2;KLF4;THBS1;ADAMTS1;PCOLCE;ANTXR1;COLEC11;ADAMTS2
GOBP_PLATELET_ACTIVATION		1.509		2.076	2.514	1.51		2.478	2.072	2.182	3.213	1.973	1.705	2.177	3.752		4		4	5	3		6	5	5	6	4	4	7	9		HRG;FGB;FGG;ABAT		FLNA;COL3A1;CSRP1;PRKG1	PRKG1;FLNA;MYL9;COL3A1;ACTN1	ACTN1;C1QTNF1;CSRP1		RAP2B;FCER1G;SYK;MERTK;PLEK;AXL	RAP2B;FCER1G;AXL;SYK;MERTK	FCER1G;SYK;LYN;PLEK;FLNA	FLNA;SYK;PLEK;FCER1G;LCK;PRKCQ	SYK;FCER1G;PRKCQ;LCK	COL3A1;VWF;PDGFB;CSRP1	SELP;TLR4;ACTN1;MMRN1;PDGFB;COL3A1;VWF	VWF;PDGFB;CSRP1;SELP;ACTN1;TLR4;NOS3;C1QTNF1;COL3A1
GOBP_CELLULAR_CARBOHYDRATE_METABOLIC_PROCESS		1.509															6															IDH1;ACACB;NNMT;PCK1;STAT3;GNMT
GOBP_PLATELET_AGGREGATION		1.494		1.925	2.542	2.006		1.328		2.317	2.527						3		3	4	3		3		4	4						FGB;FGG;ABAT		FLNA;PRKG1;CSRP1	FLNA;PRKG1;ACTN1;MYL9	ACTN1;C1QTNF1;CSRP1		SYK;PLEK;RAP2B		PLEK;FLNA;LYN;SYK	SYK;PRKCQ;FLNA;PLEK
GOBP_REGULATION_OF_HEART_GROWTH	1.421	1.494						1.328								3	3						3								HAMP;PROX1;ACACB	PROX1;HAMP;ACACB						JARID2;BASP1;DUSP6
GOBP_POSITIVE_REGULATION_OF_TRIGLYCERIDE_METABOLIC_PROCESS		1.491															2															APOA5;AADAC
GOBP_REGULATION_OF_STEROID_BIOSYNTHETIC_PROCESS	2.04	1.479														4	3														PROX1;APOB;SOD1;H6PD	PROX1;H6PD;APOB
GOBP_NEGATIVE_REGULATION_OF_RESPONSE_TO_STIMULUS	1.702	1.469			2.345	1.697	1.431	2.687	2.179	3.949	3.461	2.549	3.234	5.888	6.733	20	18			17	12	15	26	22	26	22	18	21	44	43	NLRP12;SERPING1;AR;MPV17L;TNFAIP8L1;SOD1;FGB;AMBP;C4BP;GRB14;FGG;HC;ONECUT2;HRG;VNN1;CPB2;HAMP;ERRFI1;PTPN3;DNAJA1	ERRFI1;GRB14;FGB;HC;FST;SERPING1;TNFAIP8L1;AMBP;HRG;C4BP;CPB2;CHRD;NLRP12;HAMP;CLU;PTPN3;FGG;ABAT			SFRP1;PXDN;KLF4;FBLN1;TBX2;SEMA5A;RGS4;IGFBP3;RBMS3;THY1;CAVIN3;FBN1;RGS16;COL3A1;IGFBP5;RGS5;PRKG1	IGFBP5;FBN1;C1QTNF1;THY1;RGS4;PXDN;SERPINE1;IGFBP3;TBX2;ITGA1;KLF4;FBLN1	PLEK;PRKCB;DUSP6;IL1RN;FGL2;RGS10;LAPTM5;ANXA1;KLF4;GNAI2;CD84;THBS1;NCKAP1L;FKBP1A;HMOX1	DUSP6;KLF4;FCGR3;RGS10;FGL2;UCP2;PYCARD;SPI1;PLEK;CD44;VSIG4;LAPTM5;ARRB2;AIF1;LRRK2;ANXA1;NCKAP1L;GNAI2;HCK;CD84;LGMN;DAB2;SAMHD1;SYK;METRNL;PRKCB	CD55;ARRB2;DAB2;NCKAP1L;HCK;GNAI2;FCGR3;AIF1;PYCARD;LRRK2;SYK;RGS10;PRKCB;LGMN;FGR;UCP2;FGL2;VSIG4;LAPTM5;KLF4;CD84;SPI1	ARHGAP25;AOAH;NFKB1;LAPTM5;FGR;PTPN22;AIF1;BCL2;CD44;TNFAIP3;PIP4K2A;FGL2;LEPROTL1;ANXA1;PLEK;SESN1;SYK;ATM;KLRK1;LYN;FYN;SEMA4D;RPS19;PTPRC;PRKCB;KLF4	SYK;FCGR3;PTPN22;AIF1;SAMHD1;PRKCB;SESN1;PRKCQ;PIP4K2A;LAPTM5;AOAH;KLRK1;PLEK;KLF4;SEMA4D;FYN;PTPRC;BCL2;ARHGAP25;ATM;CD44;FGL2	AIF1;ARHGAP25;SEMA4D;HCK;FGR;ATM;PRKCQ;TNFAIP3;PTPN22;SYK;PIP4K2A;FGL2;KLF4;LAPTM5;PTPRC;KLRK1;PRKCB;AOAH	KLF4;ICAM1;COL3A1;CD34;ITGA6;HIC1;PXDN;GRB10;MECOM;FKBP1A;ANGPT2;HDAC7;SOX17;PTGIS;PALM;SPRY1;BMP4;DLL1;SMAD6;ANXA1;PDGFB	ITGA6;NCOA7;MMRN2;TGFBR3;ACKR3;KLF7;DLC1;CD34;PDGFB;RASIP1;DLL1;MECOM;BMP4;EGFL7;KLF4;COL3A1;CAV2;PCGF2;RBMS3;SMAD6;CALCRL;SPRY4;TFPI;SEC14L1;DUSP5;SKI;DAB2;GRB10;PXDN;YBX3;MMRN1;CAV1;IGFBP3;SEMA6A;PEA15A;PTGIS;MAPK7;TLR4;CNKSR3;TEK;FCGR3;HDAC7;UACA;PALM	UACA;CALCRL;ECM1;KLF7;PTGIS;CLEC4G;RASIP1;IGFBP3;HEG1;SMAD6;ITGA6;C1QTNF1;MAPK7;COL3A1;PDGFB;SEMA6A;DLL1;HIC1;WWTR1;SEC14L1;TCIM;EGFL7;LGMN;TGFBR3;CAV2;SERPINE1;NOS3;ICAM1;MMRN2;PXDN;CD55;DAB2;GNAI2;PEA15A;SOX17;SEMA3F;TLR4;NCOA7;CDH5;FCGR3;CNKSR3;TFPI;KLF4
GOBP_PHOSPHATIDYLCHOLINE_METABOLIC_PROCESS		1.468															3															APOA5;APOA2;APOC1
GOBP_CELLULAR_RESPONSE_TO_INSULIN_STIMULUS	1.375	1.468					1.814	1.649	1.9			1.405				5	5					5	6	6			4				GRB14;GHR;HMGCS2;ERRFI1;SRD5A1	ERRFI1;GRB14;SRD5A1;PCK1;HMGCS2					PRKCB;NAMPT;PKM;GNAI2;RAB31	PKM;RAB31;GNAI2;UCP2;NAMPT;PRKCB	RAB31;PRKCB;NAMPT;UCP2;PKM;GNAI2			PRKCB;RAB31;PIP4K2A;PRKCQ
GOBP_CELLULAR_RESPONSE_TO_PEPTIDE_HORMONE_STIMULUS	1.367	1.468					1.854	1.554	1.818	1.514						6	6					6	7	7	6						GRB14;GHR;HMGCS2;ERRFI1;SRD5A1;STAT3	ERRFI1;GRB14;SRD5A1;PCK1;STAT3;HMGCS2					PRKCB;NAMPT;PKM;GNAI2;CYBA;RAB31	PKM;RAB31;CYBA;GNAI2;UCP2;NAMPT;PRKCB	RAB31;PRKCB;NAMPT;UCP2;PKM;CYBA;GNAI2	NFKB1;PIP4K2A;RAB31;LEPROTL1;LYN;PRKCB
GOBP_ORGANIC_HYDROXY_COMPOUND_CATABOLIC_PROCESS	2.023	1.468														4	3														SULT2A7;CYP3A13;CYP27A1;ADH4	CYP27A1;ALDH2;CYP3A13
GOBP_POSITIVE_REGULATION_OF_TRANSPORT	1.591	1.467					2.067	4.026	5.364	2.451	1.303	2.718			1.385	13	12					12	21	22	15	10	13			17	ABLIM3;FGG;CPB2;AHI1;CAMK1D;MAVS;SCP2;ACSL1;NOS1AP;ABCA1;APOA2;SOD1;FGB	ABCA1;FGB;NOS1AP;AHI1;SCP2;APOA2;CPB2;CAMK1D;CLU;APOA5;FGG;ABAT					OAZ1;PTAFR;ANXA1;SGK1;TLR2;GNAI2;CYBA;HCLS1;NCKAP1L;AXL;RAB31;PPT1	PTAFR;FCGR3;PYCARD;MERTK;FRMD4A;GZMB;ARRB2;FCER1G;LRRK2;AXL;PPT1;ANXA1;NCKAP1L;RAB31;GNAI2;CYBA;SLC11A1;S100A8;DAB2;SYK;ITGB2	AXL;ARRB2;DAB2;FRMD4A;NCKAP1L;GNAI2;FCGR3;PYCARD;LRRK2;SYK;CYBA;RAB31;SLC11A1;S100A8;TLR2;PPT1;HCLS1;FCER1G;SGK1;ITGB2;FGR;MERTK	TLR2;FCER1G;IL2RB;PTPRC;SLC11A1;RAC2;SYK;HCLS1;ITGB2;RAB31;FGR;ANXA1;SGK1;FLNA;FYN	FLNA;SYK;RAB31;FCER1G;FCGR3;IL2RB;FYN;PTPRC;S100A8;GZMB	FGR;SLC11A1;RAC2;SYK;ITGB2;IL2RB;SGK1;TLR2;FCER1G;PTPRC;S100A8;HCLS1;RAB31			GNAI2;DAB2;PDGFB;CNKSR3;TLR4;SERPINE1;FCGR3;ABCG1;SGK1;SHANK3;DLL1;ANXA2;MYO1C;RELN;C1QTNF1;RIPOR1;AQP1
GOBP_POSITIVE_REGULATION_OF_COAGULATION	1.406	1.465														2	2														HRG;CPB2	HRG;CPB2
GOBP_REGULATION_OF_ENDOCYTOSIS		1.455						2.745	3.071					1.397			5						8	8					7			APOC3;AHI1;CLU;APOA5;APOC1						NCKAP1L;DAB2;RAB31;ARRB2;SYK;LRRK2;AXL;PPT1	RAB31;PPT1;AXL;ARRB2;DAB2;NCKAP1L;LRRK2;SYK					CDH13;DAB2;EFNB2;ANXA2;CAV1;DLL1;APP
GOBP_REGULATION_OF_HETEROTYPIC_CELL_CELL_ADHESION	1.38	1.435		1.747	1.62	1.821	1.634	1.332		2.507	3.889	2.894				2	2		2	2	2	2	2		3	4	3				FGG;FGB	FGB;FGG		THY1;KLF4	THY1;KLF4	THY1;KLF4	IL1RN;KLF4	KLF4;CD44		CD44;KLF4;MBP	LCK;CD44;KLF4;MBP	KLF4;MBP;LCK
GOBP_BRANCHED_CHAIN_AMINO_ACID_METABOLIC_PROCESS	1.38	1.435	1.385													2	2	2													ACADSB;ALDH6A1	SDS;ACADSB	ACADSB;ALDH6A1
GOBP_RESPONSE_TO_TOXIC_SUBSTANCE	4.279	1.416	2.028		1.835					1.975		1.362				10	5	6		5					6		4				HP;EPHX2;FABP1;GLYAT;CAT;SRD5A1;ADH4;MGST1;SOD1;ALDH1A7	MGST1;SRD5A1;HP;EPHX2;FABP1	EPHX1;CAT;EPHX2;SRD5A1;GLYAT;FABP1		PXDN;FOS;FBLN5;SOD3;INMT					TLR2;SESN1;ALOX5AP;LYN;BCL2;MBP		S100A9;MBP;TLR2;ALOX5AP
GOBP_GLUTAMINE_FAMILY_AMINO_ACID_METABOLIC_PROCESS		1.412	1.413														3	3														OAT;TAT;FTCD	FTCD;TAT;ASL
GOBP_REGULATION_OF_LIPOPROTEIN_PARTICLE_CLEARANCE		1.407															2															APOC3;APOC1
GOBP_LONG_CHAIN_FATTY_ACID_BIOSYNTHETIC_PROCESS		1.407															2															CYP3A13;CYP2D10
GOBP_PROTEIN_MATURATION	1.315	1.407						1.489								6	6						7								HP;FGG;CPB2;LONP2;F9;FGB	LONP2;FGB;F9;HP;CPB2;FGG						VSIR;LGMN;CD5L;PYCARD;CPM;LRRK2;CTSH
GOBP_RESPONSE_TO_CARBOHYDRATE	1.736	1.398														6	5														CPB2;MLXIPL;HMGCS2;CAT;APOA2;APOB	APOB;APOA2;PCK1;HMGCS2;CPB2
GOBP_VESICLE_MEDIATED_TRANSPORT		1.398					3.565	6.724	7.558	5.709	3.756	6.06					17					21	35	34	29	22	25					ABCA1;FGB;APOC3;MYO1B;AHI1;PRG4;APOA2;SEC23A;CAMK1D;CRP;CLU;LRP6;APOA5;C4BP;SLC17A9;FGG;APOC1					CD93;TNFAIP2;CYBA;TYROBP;PLEK;ANXA1;TLR2;CD84;IRF8;PRKCB;NCF2;PTAFR;GNAI2;THBS1;AXL;NCKAP1L;HMOX1;PPT1;PLD4;LAPTM5;RAB31	PTAFR;STX7;FCGR3;PYCARD;SPI1;PLEK;AP1S2;IRF8;MERTK;LAPTM5;CD5L;ARRB2;FCER1G;AIF1;LRRK2;AXL;PPT1;ANXA1;NCKAP1L;RAB31;GNAI2;CYBA;PLD4;HCK;NCF2;CD84;SLC11A1;DAB2;MRC1;WAS;SYK;TYROBP;ITGB2;WASF2;PRKCB	WAS;MRC1;AXL;ARRB2;DAB2;MSR1;NCKAP1L;CD5L;HCK;GNAI2;FCGR3;AIF1;PYCARD;LRRK2;SYK;CYBA;RAB31;SLC11A1;PRKCB;TLR2;PPT1;FCER1G;IRF8;ITGB2;AP1S2;NCF2;MARCO;FGR;PLD4;TYROBP;MERTK;LAPTM5;CD84;SPI1	ARHGAP25;ITGAL;TLR2;IL2RB;CDC42SE2;LAPTM5;FGR;AIF1;TYROBP;RAC2;PIP4K2A;LEPROTL1;ANXA1;PLEK;FLNA;CORO1A;SYK;LYN;TNFAIP2;FYN;NCF2;FCER1G;PTPRC;SLC11A1;SH3KBP1;ARL4C;ITGB2;RAB31;PRKCB	KIT;SYK;FCER1G;FCGR3;AIF1;RASGRP1;PRKCB;CORO1A;IL2RB;CDC42SE2;PIP4K2A;LAPTM5;ARL4C;SH3KBP1;FLNA;PLEK;FYN;PTPRC;TYROBP;RAB31;ARHGAP25;NCF2	SLC11A1;SYK;SH3KBP1;LAPTM5;RAB31;AIF1;RAC2;BIN2;PIP4K2A;ITGB2;CORO1A;PRKCB;FCER1G;NCF2;HCK;FGR;KIT;ARHGAP25;ITGAL;RASGRP1;IL2RB;TYROBP;TLR2;PTPRC;ARL4C
GOBP_BENZENE_CONTAINING_COMPOUND_METABOLIC_PROCESS	1.333	1.385	2.287													2	2	3													EPHX2;HAAO	HAAO;EPHX2	TDO2;HAAO;EPHX2
GOBP_FOLIC_ACID_CONTAINING_COMPOUND_METABOLIC_PROCESS		1.385															2															ALDH1L1;FTCD
GOBP_ANDROGEN_METABOLIC_PROCESS	1.333	1.385														2	2														SRD5A1;CYP3A13	SRD5A1;CYP3A13
GOBP_AMINE_CATABOLIC_PROCESS		1.385	2.287														2	3														HAAO;ALDH7A1	ALDH7A1;TDO2;HAAO
GOBP_POSITIVE_REGULATION_OF_CELL_MORPHOGENESIS_INVOLVED_IN_DIFFERENTIATION		1.377															3															FBXO31;FGB;FGG
GOBP_RESPONSE_TO_PEPTIDE_HORMONE	1.631	1.373	1.517	1.349			2.711	1.739	2.072	3.3		1.505				8	7	7	5			9	9	9	11		6				GRB14;GHR;HMGCS2;ERRFI1;LRP6;CAT;SRD5A1;STAT3	ERRFI1;GRB14;SRD5A1;PCK1;STAT3;HMGCS2;LRP6	HMGCS2;LRP6;CAT;PCK1;STAT3;SRD5A1;GHR	COL1A1;FBN1;IGFBP5;COL3A1;EDNRB			PRKCB;CYBB;NAMPT;PKM;ANXA1;TLR2;GNAI2;CYBA;RAB31	ANXA1;PKM;RAB31;CYBB;GNAI2;UCP2;CYBA;NAMPT;PRKCB	RAB31;CYBB;PRKCB;NAMPT;TLR2;UCP2;PKM;CYBA;GNAI2	BTG2;TLR2;NFKB1;CYBB;BTG1;PIP4K2A;RAB31;LEPROTL1;LYN;ANXA1;PRKCB		PRKCQ;PIP4K2A;CYBB;TLR2;PRKCB;RAB31
GOBP_PYRIDINE_NUCLEOTIDE_BIOSYNTHETIC_PROCESS		1.363	1.309										1.497				2	2										2				HAAO;NNMT	HAAO;NADK2										PTGIS;NAMPT
GOBP_NEGATIVE_REGULATION_OF_IMMUNE_SYSTEM_PROCESS		1.363					4.459	7.534	7.636	5.828	4.486	5.012					7					12	19	18	15	12	12					FGL1;HC;AMBP;SERPING1;APOA2;ID2;C4BP					THBS1;TYROBP;FGL2;LAPTM5;LST1;ANXA1;CD84;C1QC;AXL;NCKAP1L;HMOX1;VSIR	VSIR;FCGR3;FGL2;SPI1;C1QC;VSIG4;MERTK;LAPTM5;ARRB2;IFI205;AXL;ANXA1;NCKAP1L;HCK;CD84;SAMHD1;SYK;TYROBP;CD86	FCGR3;CD55;FGR;TYROBP;C1QC;AXL;ARRB2;NCKAP1L;HCK;SYK;FGL2;LST1;LAPTM5;MERTK;VSIG4;VSIR;CD84;SPI1	PTPN22;RPS19;PTPRC;TYROBP;TNFAIP3;SYK;LAPTM5;ATM;FGL2;KLRK1;FGR;ANXA1;LYN;FYN;LST1	SAMHD1;SYK;TYROBP;IFI205;FCGR3;FYN;PTPN22;PTPRC;ATM;LAPTM5;KLRK1;FGL2	HCK;PTPN22;ATM;FGR;TNFAIP3;SYK;FGL2;TYROBP;LAPTM5;PTPRC;KLRK1;LST1
GOBP_REGULATION_OF_PLATELET_AGGREGATION		1.363								1.446	1.565	1.694					2								2	2	2					FGG;ABAT								LYN;SYK	SYK;PRKCQ	SYK;PRKCQ
GOBP_ESTROGEN_METABOLIC_PROCESS		1.363															2															CYP3A13;CYP2D10
GOBP_CELLULAR_MODIFIED_AMINO_ACID_CATABOLIC_PROCESS	1.315	1.363														2	2														BHMT;ALDH1L1	BHMT;ALDH1L1
GOBP_NEGATIVE_REGULATION_OF_EXTRINSIC_APOPTOTIC_SIGNALING_PATHWAY_VIA_DEATH_DOMAIN_RECEPTORS		1.335													2.575		2													4		FGB;FGG													PEA15A;SERPINE1;NOS3;ICAM1
GOBP_SULFUR_COMPOUND_METABOLIC_PROCESS	5.081	1.332	3.746													13	6	10													GHR;HMGCS2;SULT2A7;ACACB;BAAT;AASS;GNMT;GLYAT;ACSL1;BHMT;ADI1;SOD1;IDH1	IDH1;ACACB;AASS;HMGCS2;GNMT;BHMT	AASS;TDO2;HMGCS2;ACSL1;GNMT;CSAD;BAAT;GHR;GLYAT;BHMT
GOBP_CYTOKINE_PRODUCTION		1.332					6.982	11.074	12.656	7.873	10.284	10.358	1.456				10					20	30	30	23	24	23	9				ERRFI1;HC;APOA2;ORM2;STAT3;IL1RAP;CRP;NLRP12;CLU;KPNA6					CYBA;TYROBP;ANXA1;TLR2;CD84;IRF8;CD83;CYBB;PTAFR;IFNGR1;THBS1;AXL;NCKAP1L;HMOX1;KLF4;PLD4;ICOSL;LAPTM5;NFAM1;VSIR	PTAFR;VSIR;KLF4;CSF1R;FCGR3;PYCARD;VSIG4;IRF8;MERTK;LAPTM5;ARRB2;IFI205;FCER1G;AIF1;LRRK2;AXL;ANXA1;IFNGR1;NCKAP1L;CD83;CYBA;PLD4;ICOSL;CD84;SLC11A1;NFAM1;CYBB;SYK;TYROBP;CD86	CD55;AXL;ICOSL;NCKAP1L;ARRB2;IFNGR1;FCGR3;AIF1;PYCARD;LRRK2;SYK;CYBA;SLC11A1;NFAM1;TLR2;FCER1G;IRF8;IL6RA;REL;CYBB;FGR;PLD4;CSF1R;TYROBP;MERTK;VSIG4;LAPTM5;VSIR;KLF4;CD84	TLR2;NFKB1;CYBB;LAPTM5;FGR;PTPN22;AIF1;MBP;CSF1R;TYROBP;TNFAIP3;KLF2;ANXA1;CD83;SASH3;SYK;KLRK1;LYN;FCER1G;PTPRC;SLC11A1;ADGRG1;KLF4	SRGN;KIT;CD83;ADGRG1;SYK;FCER1G;IFI205;FCGR3;KLF2;PTPN22;AIF1;RASGRP1;CYBB;PRKCQ;LAPTM5;KLRK1;SASH3;LTB;KLF4;MBP;PTPRC;GBP5;TYROBP;CSF1R	SLC11A1;PRKCQ;SYK;CSF1R;LAPTM5;ADGRG1;AIF1;KLF4;KLRK1;LTB;FCER1G;FGR;KIT;SASH3;KLF2;PTPN22;TNFAIP3;RASGRP1;TYROBP;CYBB;TLR2;MBP;PTPRC	IL33;ADGRG1;KLF4;DLL1;HDAC7;ANXA1;CD34;COL3A1;APP
GOBP_REGULATION_OF_CELLULAR_CARBOHYDRATE_METABOLIC_PROCESS		1.332															4															ACACB;GNMT;NNMT;STAT3
GOBP_IRON_ION_HOMEOSTASIS		1.332															3															HAMP;HPX;STEAP4
GOBP_VASOCONSTRICTION		1.332		1.777	1.611												3		3	3												CRP;FGB;FGG		ACTA2;MMP2;EDNRB	EDNRB;ACTA2;MMP2
GOBP_BIOLOGICAL_PROCESS_INVOLVED_IN_INTERACTION_WITH_SYMBIONT		1.321															3															CRP;HRG;CFHR1
GOBP_PIGMENT_METABOLIC_PROCESS		1.321															3															HPX;ALAS1;AMBP
GOBP_INTERLEUKIN_6_PRODUCTION	1.717	1.318	1.367				2.853	4.334	5.605	4.04	2.882	4.926				5	4	4				6	9	10	8	6	8				IL1RAP;NLRP12;MAVS;ORM2;STAT3	NLRP12;ORM2;IL1RAP;STAT3	NLRP12;STAT3;MAVS;IL1RAP				PTAFR;TLR2;CD84;NCKAP1L;CYBA;TYROBP	PTAFR;NCKAP1L;CYBA;ARRB2;PYCARD;SYK;TYROBP;AIF1;CD84	AIF1;TLR2;TYROBP;PYCARD;ARRB2;NCKAP1L;CYBA;SYK;IL6RA;CD84	TLR2;TYROBP;TNFAIP3;SYK;KLF2;PTPN22;AIF1;MBP	SYK;KLF2;PTPN22;MBP;AIF1;TYROBP	AIF1;PTPN22;TNFAIP3;SYK;TYROBP;TLR2;MBP;KLF2
GOBP_LOW_DENSITY_LIPOPROTEIN_PARTICLE_CLEARANCE		1.318															2															APOC3;APOB
GOBP_RESPONSE_TO_PROSTAGLANDIN		1.318								1.408		1.649					2								2		2					APOB;HMGCS2								PTGER2;GNG2		GNG2;PTGER2
GOBP_SULFUR_AMINO_ACID_METABOLIC_PROCESS	2.04		2.169													3		3													ADI1;BHMT;GNMT		GNMT;CSAD;BHMT
GOBP_POSITIVE_REGULATION_OF_DNA_BINDING_TRANSCRIPTION_FACTOR_ACTIVITY	1.913		1.715						2.012		1.962	3.497				7		6						7		6	8				IL1RAP;AR;CAMK1D;MAVS;LRP6;CAT;STAT3		LRP6;CAT;IL1RAP;STAT3;MAVS;CAMK1D						S100A8;NFAM1;PRKCB;S100A9;TLR2;HCLS1;PYCARD		KIT;PRKCB;PRKCQ;S100A8;S100A9;PRKCH	PRKCQ;S100A9;KIT;PRKCH;TLR2;S100A8;PRKCB;HCLS1
GOBP_DIGESTIVE_SYSTEM_DEVELOPMENT					1.721															4															EDNRB;COL3A1;TBX2;SFRP1
GOBP_RESPONSE_TO_TESTOSTERONE	1.794															3															HMGCS2;SRD5A1;AR
GOBP_RHYTHMIC_BEHAVIOR
GOBP_DIGESTIVE_TRACT_MORPHOGENESIS
GOBP_POSITIVE_REGULATION_OF_VASCULATURE_DEVELOPMENT	1.609			1.763		1.88	4.11	1.446		2.366	1.459		3.307	2.667	7.617	5			4		4	8	5		6	4		7	9	15	HC;LRG1;ANGPTL3;ANGPTL4;STAT3			CCBE1;THBS1;SEMA5A;KLF4		ENG;SERPINE1;CCBE1;KLF4	PRKCB;CTSH;CYBB;PKM;THBS1;CXCR4;KLF4;HMOX1	PKM;KLF4;CYBB;CTSH;PRKCB		ETS1;CYBB;BTG1;CXCR4;PRKCB;KLF4	ETS1;CYBB;KLF4;PRKCB		PTGIS;ANGPT2;KLF4;DLL1;ACVRL1;CD34;TIE1	ACVRL1;PTGIS;KLF4;RAMP2;TIE1;TEK;KDR;CD34;DLL1	ITGA5;RAMP2;ECM1;ENG;TIE1;PTGIS;CDH5;SERPINE1;FLT1;DLL1;NOS3;KDR;ACVRL1;KLF4;AQP1
GOBP_NUCLEOBASE_CONTAINING_SMALL_MOLECULE_METABOLIC_PROCESS	2.533		3.246													12		12													MLXIPL;HMGCS2;SULT2A7;ACACB;BAAT;HAAO;GNMT;GLYAT;ACSL1;AASS;STAT3;ALDH6A1		AASS;TDO2;HMGCS2;ACSL1;NADK2;MLXIPL;STAT3;GNMT;BAAT;HAAO;GLYAT;ALDH6A1
GOBP_HORMONE_BIOSYNTHETIC_PROCESS
GOBP_PHOTORECEPTOR_CELL_DIFFERENTIATION
GOBP_NEGATIVE_REGULATION_OF_PHOSPHORYLATION	1.414					1.582				1.564		1.653				7					5				7		6				NLRP12;CHORDC1;MLXIPL;ERRFI1;LRP6;DNAJA1;STAT3					THY1;ENG;CTDSPL;IGFBP3;FBLN1				PTPRC;TNFAIP3;PIP4K2A;LYN;GADD45B;PTPN22;SEMA4D		PTPN22;GADD45B;TNFAIP3;PIP4K2A;PTPRC;SEMA4D
GOBP_REGULATION_OF_BEHAVIOR
GOBP_PURINE_CONTAINING_COMPOUND_METABOLIC_PROCESS	2.481		2.47													10		9													MLXIPL;HMGCS2;SULT2A7;ACACB;BAAT;AASS;GNMT;GLYAT;ACSL1;STAT3		AASS;TDO2;HMGCS2;ACSL1;MLXIPL;STAT3;GNMT;BAAT;GLYAT
GOBP_RESPONSE_TO_CYTOKINE				1.432	1.44		3.949	6.996	6.881	7.413	6.928	7.737	2.518	2.921	2.724				8	9		16	26	24	24	21	21	13	23	21				COL1A1;MMP2;PXDN;TIMP2;KLF4;THBS1;VIM;COL3A1	COL1A1;VIM;SFRP1;PXDN;FOS;KLF4;MMP2;COL3A1;TIMP2		IL1RN;LAPTM5;ANXA1;TLR2;IFNGR1;VCAM1;CYBA;HCLS1;THBS1;AXL;VIM;IRF8;KLF4;PLP2;LIMS1;CXCR4	KLF4;CSF1R;ASAH1;PYCARD;SPI1;CD44;IRF8;LAPTM5;IFI205;FCER1G;AIF1;AXL;ANXA1;IFNGR1;PLP2;CYBA;HCK;VCAM1;SLC11A1;VIM;MRC1;JARID2;SAMHD1;WAS;LIMS1;SYK	WAS;VCAM1;VIM;MRC1;AXL;IFNGR1;HCK;JARID2;AIF1;PYCARD;SYK;CYBA;SLC11A1;ASAH1;TLR2;HCLS1;FCER1G;IRF8;IL6RA;REL;CSF1R;LAPTM5;KLF4;SPI1	TLR2;IL2RB;NFKB1;LAPTM5;CXCR4;AIF1;BCL2;JARID2;MBP;CD44;CSF1R;TCF7;TNFAIP3;KLF2;ANXA1;VIM;CORO1A;SYK;HCLS1;CCR5;FCER1G;PTPRC;SLC11A1;KLF4	KIT;SYK;FCER1G;KLF2;IFI205;CCR5;AIF1;SAMHD1;CORO1A;IL2RB;LAPTM5;JARID2;KLF4;MBP;PTPRC;GBP5;BCL2;CSF1R;TCF7;VIM;CD44	SLC11A1;SYK;CSF1R;LAPTM5;TCF7;AIF1;CORO1A;KLF4;HCLS1;FCER1G;HCK;KIT;CCR5;KLF2;TNFAIP3;VIM;IL2RB;TLR2;MBP;PTPRC;JARID2	PTGIS;PXDN;VIM;APP;KLF4;PDGFB;TIMP2;ICAM1;DPYSL3;ANXA1;COL3A1;IL33;SOX17	UGCG;MRC1;EPOR;ACKR3;VCAM1;PDGFB;IL33;AKAP12;DPYSL3;KLF4;APP;SELP;SPRY4;PXDN;YBX3;VIM;CAV1;TIMP2;KLF2;PTGIS;MAPK7;TLR4;COL3A1	PLVAP;ECM1;PTGIS;MYO1C;EPOR;MRC1;MAPK7;PDGFB;SELP;IL33;DPYSL3;ICAM1;VCAM1;PXDN;AKAP12;SOX17;KLF2;TLR4;VIM;COL3A1;KLF4
GOBP_NEGATIVE_REGULATION_OF_GROWTH					2.307								1.58	1.586	1.759					6								5	8	8					SFRP1;SEMA5A;RGS4;FHL1;CRYAB;IGFBP5								BMP4;ADAM15;GJA1;ACVRL1;SOX17	ACVRL1;NPR1;BMP4;ADAM15;PLAC8;DAB2;FHL1;SEMA6A	DAB2;SEMA6A;SOX17;LGMN;SEMA3F;PLAC8;ADAM15;ACVRL1
GOBP_ACTIN_FILAMENT_BUNDLE_ORGANIZATION					2.22			2.074		1.858	2.124				1.979					5			6		5	5				7					SFRP1;FLNA;MARCKS;TPM1;ACTN1			MARCKS;CCDC88A;WAS;AIF1;PLEK;WASF2		CCDC88A;PLEK;FLNA;AIF1;EVL	EVL;CCDC88A;FLNA;PLEK;AIF1				FSCN1;DPYSL3;ACTN1;SHANK3;LIMCH1;PXN;NEDD9
GOBP_NEPHRON_TUBULE_EPITHELIAL_CELL_DIFFERENTIATION															1.467															2															WWTR1;MEF2C
GOBP_CHONDROCYTE_DIFFERENTIATION													1.894	2.506	2.098													4	7	6													COL3A1;SERPINH1;BMP4;ACVRL1	ACVRL1;BMP4;MEF2C;SERPINH1;CHSY1;COL3A1;MAF	MAF;MEF2C;ECM1;CHSY1;ACVRL1;COL3A1
GOBP_HETEROTYPIC_CELL_CELL_ADHESION							1.872	2.201	1.612	3.433	3.707	4.006			1.715							3	4	3	5	5	5			4							VCAM1;IL1RN;KLF4	VCAM1;KLF4;ITGB2;CD44	VCAM1;ITGB2;KLF4	CD44;PTPRC;ITGB2;KLF4;MBP	LCK;KLF4;PTPRC;MBP;CD44	ITGB2;KLF4;MBP;PTPRC;LCK			VCAM1;MAPK7;ITGA5;KLF4
GOBP_POSITIVE_REGULATION_OF_SMOOTH_MUSCLE_CELL_MIGRATION				1.582		1.617				2.205	2.372	1.555			1.573				2		2				3	3	2			3				IGFBP5;ADAMTS1		IGFBP5;ADAMTS1				AIF1;BCL2;S100A11	S100A11;BCL2;AIF1	AIF1;S100A11			PDGFB;TLR4;ADAMTS1
GOBP_B_CELL_HOMEOSTASIS										2.329															3															BCL2;TNFAIP3;LYN
GOBP_OVARIAN_FOLLICLE_DEVELOPMENT											1.895															3															KIT;BCL2;ATM
GOBP_MYELIN_ASSEMBLY									1.567															2															TLR2;EPB41L3
GOBP_POSITIVE_REGULATION_OF_BLOOD_CIRCULATION					1.44	1.596														2	2														RGS4;TPM1	TPM1;RGS4
GOBP_COLLAGEN_ACTIVATED_SIGNALING_PATHWAY				3.349									1.767						3									2						COL4A2;COL1A1;COL4A1									COL4A2;COL4A1
GOBP_MULTICELLULAR_ORGANISMAL_HOMEOSTASIS								1.532		1.667		1.492		2.811	2.844								10		9		7		17	16								SLC40A1;VSTM4;KDM6B;CSF1R;UCP2;SYK;METRNL;LIPA;CTSH;SLC11A1		CSF1R;SLC11A1;CORO1A;TNFAIP3;SASH3;SYK;CXCR4;BCL2;MBP		SLC11A1;TNFAIP3;SYK;SASH3;CSF1R;CORO1A;MBP		UGCG;EDNRB;KDM6B;CLDN5;PRCP;ESAM;PECAM1;COL3A1;PLAC8;TLR4;GRB10;KDR;LDB2;CAV1;CD34;DLL1;ADGRF5	WWTR1;ADGRF5;ESAM;COL3A1;PECAM1;KDM6B;PLAC8;TLR4;CDH5;NOS3;DLL1;KDR;CLDN5;PRCP;JAM2;AQP1
GOBP_MESODERM_MORPHOGENESIS													1.597	1.397														3	4														GJA1;KLF4;BMP4	TAL1;BMP4;KLF4;KDM6B
GOBP_EXOCYTIC_PROCESS										1.474															3															PLEK;LYN;SYK
GOBP_POSITIVE_REGULATION_OF_MORPHOGENESIS_OF_AN_EPITHELIUM													1.362															2															GJA1;BMP4
GOBP_MICROGLIAL_CELL_MEDIATED_CYTOTOXICITY								2.461	2.599														2	2														SPI1;TYROBP	TYROBP;SPI1
GOBP_CELLULAR_RESPONSE_TO_PEPTIDE							2.466	2.986	3.431	3.065	2.973	2.188	1.894	1.47	2.899							8	11	11	10	9	7	7	10	13							PRKCB;NAMPT;PKM;GNAI2;VCAM1;CYBA;RAB31;VIM	VIM;LGMN;PKM;FCGR3;RAB31;GNAI2;UCP2;CYBA;NAMPT;VCAM1;PRKCB	RAB31;FCGR3;VCAM1;VIM;PRKCB;NAMPT;LGMN;UCP2;PKM;CYBA;GNAI2	PTPN22;NFKB1;PIP4K2A;KLF2;RAB31;LEPROTL1;LYN;PRKCB;FYN;VIM	PRKCB;RAB31;KLF2;FCGR3;VIM;FYN;PRKCQ;PTPN22;PIP4K2A	PTPN22;PRKCQ;VIM;PIP4K2A;PRKCB;RAB31;KLF2	NAMPT;VIM;SOGA1;GJA1;GRB10;ICAM1;APP	KLF2;NAMPT;TLR4;CAV2;VCAM1;GRB10;VIM;FCGR3;CAV1;APP	NAMPT;GNAI2;SOGA1;LGMN;KLF2;TLR4;VIM;CAV2;FCGR3;ICAM1;MYO1C;PXN;VCAM1
GOBP_METANEPHRIC_GLOMERULAR_MESANGIUM_DEVELOPMENT													2.539	1.984														2	2														CD34;PDGFB	PDGFB;CD34
GOBP_ALDITOL_PHOSPHATE_METABOLIC_PROCESS								1.872															2															GPAT3;GK
GOBP_CYCLIC_NUCLEOTIDE_MEDIATED_SIGNALING				1.809										1.318					3										4					THBS1;PRKG1;EDNRB										EDNRB;MAPK7;ADGRG6;NPR1
GOBP_POSITIVE_REGULATION_OF_BLOOD_VESSEL_ENDOTHELIAL_CELL_MIGRATION							1.844						2.531									3						4									HMOX1;ANXA1;THBS1						RHOJ;HDAC7;ANXA1;PDGFB
GOBP_RESPONSE_TO_HEAT	1.645						1.395									4						3									CHORDC1;SOD1;CPB2;DNAJA1						IER5;HMOX1;THBS1
GOBP_MESODERMAL_CELL_FATE_COMMITMENT													1.767															2															KLF4;BMP4
GOBP_AGING					1.903															6															EDNRB;FOS;TBX2;MMP2;CRYAB;IGFBP5
GOBP_REGULATION_OF_METALLOPEPTIDASE_ACTIVITY				1.929	1.809														2	2														TIMP2;ANTXR1	ANTXR1;TIMP2
GOBP_HOMEOSTASIS_OF_NUMBER_OF_CELLS_WITHIN_A_TISSUE										2.39	2.554	1.694													3	3	2													CORO1A;BCL2;SASH3	CORO1A;BCL2;SASH3	SASH3;CORO1A
GOBP_CELLULAR_NITROGEN_COMPOUND_CATABOLIC_PROCESS	1.463		1.365													8		7													CYP3A13;ALDH1L1;AMBP;HAAO;A1CF;SLCO1B2;BHMT;ALDH6A1		TDO2;CYP2D10;A1CF;BHMT;RIDA;HAAO;ALDH6A1
GOBP_REGULATION_OF_SMALL_GTPASE_MEDIATED_SIGNAL_TRANSDUCTION										2.374	2.772	2.507		1.788	1.625										8	8	7		10	9										ARHGAP30;ARHGAP25;ARHGDIB;TAGAP1;ARHGAP45;CDC42SE2;ARHGAP9;ADGRG1	RASGRP1;ADGRG1;ARHGAP30;TAGAP1;ARHGAP25;ARHGDIB;CDC42SE2;ARHGAP9	ARHGAP25;ARHGAP9;ARHGDIB;ARHGAP30;ARHGAP45;RASGRP1;ADGRG1		ARHGAP23;SPRY4;ADGRG1;PREX2;RELN;TIAM1;DLC1;FGD5;COL3A1;RASIP1	RELN;PLEKHG1;ARHGAP31;ARHGAP23;RASIP1;HEG1;ADGRG1;PREX2;COL3A1
GOBP_REGULATION_OF_TOLL_LIKE_RECEPTOR_2_SIGNALING_PATHWAY										2															2															TNFAIP3;LYN
GOBP_POSITIVE_REGULATION_OF_LEUKOCYTE_CHEMOTAXIS								2.455	3.548	1.371		1.682											5	6	3		3											NCKAP1L;LGMN;CSF1R;SPI1;AIF1	AIF1;LGMN;CSF1R;NCKAP1L;IL6RA;SPI1	CSF1R;RAC2;AIF1		AIF1;RAC2;CSF1R
GOBP_RESPONSE_TO_IRON_ION							1.499															2															SLC40A1;HMOX1
GOBP_POSITIVE_REGULATION_OF_PHAGOCYTOSIS	1.489						1.815	6.026	6.38	3.325	3.598	3.895				3						3	8	8	5	5	5				APOA2;SOD1;CAMK1D						CYBA;RAB31;NCKAP1L	NCKAP1L;FCGR3;RAB31;CYBA;PYCARD;FCER1G;MERTK;SLC11A1	RAB31;FCGR3;SLC11A1;FCER1G;PYCARD;NCKAP1L;CYBA;MERTK	FCER1G;IL2RB;PTPRC;SLC11A1;RAB31	FCER1G;RAB31;FCGR3;IL2RB;PTPRC	SLC11A1;IL2RB;PTPRC;RAB31;FCER1G
GOBP_LEUKOTRIENE_BIOSYNTHETIC_PROCESS										1.856		2.124													2		2													ALOX5AP;SYK		SYK;ALOX5AP
GOBP_MAMMARY_GLAND_ALVEOLUS_DEVELOPMENT	1.539															2															AR;ID2
GOBP_INNATE_IMMUNE_RESPONSE_ACTIVATING_SIGNAL_TRANSDUCTION								2.364	2.539	5.161	4.021	4.302											3	3	5	4	4											HCK;TYROBP;SYK	HCK;SYK;TYROBP	TYROBP;SYK;KLRK1;LYN;FYN	SYK;KLRK1;TYROBP;FYN	KLRK1;TYROBP;HCK;SYK
GOBP_NEURAL_TUBE_PATTERNING													1.362															2															BMP4;SOX17
GOBP_TISSUE_DEVELOPMENT				5.238	5.745	5.081		2.632	1.507	1.813	1.759	1.63	8.293	8.617	9.231				23	27	21		29	22	22	19	17	33	55	53				GPC6;COL6A1;VIM;COL5A1;FLNA;ACTA2;TPM1;EMP1;COL3A1;COL4A1;EDNRB;COL1A1;MMP2;LAMC1;COL1A2;KLF4;IGFBP5;SEMA5A;CSRP1;LAMB1;COL4A2;FSTL1;ITGA8	KAZN;EDNRB;SFRP1;FLNA;MYH11;ITGA8;MMP2;COL3A1;IGFBP5;MGP;FSTL1;COL1A1;COL1A2;TPM1;COL6A1;ACTA2;RGS4;COL5A1;LAMC1;VIM;LAMB1;FOS;TBX2;KLF4;SEMA5A;EMP1;GPC6	LAMC1;ENG;COL6A1;MYH11;VIM;GJA4;COL1A2;ITGA8;SERPINE1;LAMB1;KLF4;IGFBP5;TBX2;GPC6;TPM1;RGS4;COL5A1;PTH1R;MGP;CSRP1;COL1A1		SECTM1A;KLF4;CSF1R;ASAH1;SPI1;CD44;MAF;ARRB2;TENT5A;MEGF9;NAMPT;TRPS1;CTSH;ANXA1;CTSB;BASP1;KDM6B;GLIPR2;HCK;SLC40A1;RAP2B;VIM;DAB2;MYH11;JARID2;WAS;LIMS1;TGFBI;ITGB2	WAS;VIM;BASP1;ARRB2;DAB2;HCK;MAF;JARID2;TGFBI;SLC40A1;MYH11;KDM6B;ASAH1;RAP2B;NAMPT;IL6RA;ITGB2;FGR;CSF1R;CTSB;KLF4;SPI1	FGR;CXCR4;BCL2;JARID2;CD44;BTG2;CSF1R;TGFBI;BTG1;KLF2;ANXA1;FLNA;VIM;PRKCH;ATM;SEMA4D;AKNA;PTPRC;PBXIP1;ITGB2;IKZF1;KLF4	SRGN;MAF;KLF2;TOX;AKNA;TGFBI;IKZF1;JARID2;FLNA;PBXIP1;KLF4;SEMA4D;PTPRC;PRKCH;BCL2;CSF1R;VIM;ATM;CD44	HCK;FGR;ATM;TGFBI;PBXIP1;IKZF1;VIM;ITGB2;CSF1R;PRKCH;KLF4;PTPRC;AKNA;JARID2;KLF2;TOX;SEMA4D	SERPINH1;COL4A2;GJA1;KLF4;TIAM1;TAGLN2;ADAMTS9;PRICKLE2;ICAM1;ACVRL1;COL3A1;CD34;ITGA6;NAMPT;EMP1;FKBP1A;CSRP1;SELENON;COL8A1;APOLD1;TIE1;SOX17;COL4A1;SPRY1;BMP4;VIM;SLC20A1;ADAM15;DLL1;LAMB2;SMAD6;ANXA1;PDGFB	UGCG;ACVRL1;ITGA6;TAL1;ADAM15;MMRN2;MEF2C;EPOR;NAMPT;TGFBR3;COL8A1;MGP;EFNB2;TIAM1;KLF7;DLC1;PGM5;TAGLN2;PDGFB;RASIP1;MAF;DLL1;BMP4;CHSY1;KLF4;GJA5;CAV2;POSTN;LUZP1;LDB2;SLC20A1;KDR;ADAMTS9;SMAD6;DUSP5;SKI;PECAM1;EMP1;TIE1;DAB2;YBX3;VIM;SELENON;CAV1;APOLD1;SEMA6A;EDNRB;KLF2;KDM6B;CLDN5;SERPINH1;LAMB2;COL3A1;CD34;CNN3	NAMPT;SLC20A1;KLF7;ECM1;PLXND1;APOLD1;RASIP1;HEG1;CLDN5;ADAM15;SMAD6;ITGA6;EPOR;ACVRL1;MEF2C;COL3A1;PDGFB;SEMA6A;CSRP1;ROBO4;TAGLN2;POSTN;CHSY1;DLL1;SOX7;GJA4;PRICKLE2;WWTR1;MAF;ITGA5;ETS2;SELENON;ENG;TGFBR3;CAV2;SERPINE1;NOS3;MGP;ICAM1;CNN3;KDR;DAB2;TAL1;SOX17;SEMA3F;PECAM1;KDM6B;KLF2;VIM;TIE1;CDH5;MMRN2;KLF4
GOBP_POSITIVE_REGULATION_OF_SYNCYTIUM_FORMATION_BY_PLASMA_MEMBRANE_FUSION										1.545	1.667	1.8													2	2	2													CD53;TYROBP	CD53;TYROBP	TYROBP;CD53
GOBP_LEUKOCYTE_HOMEOSTASIS							2.223	2.433	1.918	2.77												4	5	4	5												AXL;SLC40A1;ANXA1;NCKAP1L	ANXA1;NCKAP1L;SLC40A1;MERTK;AXL	AXL;NCKAP1L;SLC40A1;MERTK	CORO1A;TNFAIP3;LYN;ANXA1;BCL2
GOBP_CELL_ADHESION_MEDIATED_BY_INTEGRIN					1.585	3.675				2.032		1.682			1.874					3	5				4		3			5					ITGA9;FBN1;ITGA8	FBN1;ITGA8;SERPINE1;ITGA1;ITGA9				ITGAL;ITGB2;LYN;SYK		SYK;ITGB2;ITGAL			ITGA5;ITGA9;SERPINE1;ICAM1;ITGA6
GOBP_LOCALIZATION_WITHIN_MEMBRANE										1.581	1.625	1.503													10	9	8													ITGAL;PTPRC;PRKCH;CCDC88A;ARL4C;RAB31;ITGB2;NCF1;FLNA;FYN	CCDC88A;ARL4C;FLNA;FYB;RAB31;FYN;PTPRC;GZMB;PRKCH	CCDC88A;ITGAL;FYB;ITGB2;PRKCH;PTPRC;ARL4C;RAB31
GOBP_REGULATION_OF_CELLULAR_RESPONSE_TO_GROWTH_FACTOR_STIMULUS				2.879	2.44	1.839							2.755	4.844	4.089				7	7	5							8	16	14				CCBE1;FBN1;LTBP4;THBS1;FSTL1;ITGA8;CD63	FSTL1;SFRP1;LTBP4;CD63;ITGA8;CCBE1;FBN1	FBN1;ENG;ITGA8;CD63;CCBE1							SPRY1;BMP4;GRB10;ACVRL1;DLL1;LTBP4;SMAD6;FKBP1A	ACVRL1;SMAD6;BMP4;SPRY4;MMRN2;SKI;TGFBR3;DAB2;CAV2;ZEB2;GRB10;KDR;LTBP4;CAV1;DLL1;SEMA6A	DAB2;ITGA5;SEMA6A;ENG;ZEB2;TGFBR3;CAV2;CDH5;MMRN2;DLL1;MYO1C;SMAD6;ACVRL1;KDR
GOBP_VASODILATION				1.386															2															PRKG1;EDNRB
GOBP_ANATOMICAL_STRUCTURE_HOMEOSTASIS										1.828	1.67	1.901		1.404	2.356										7	6	6		9	11										CSF1R;CORO1A;TNFAIP3;SYK;SASH3;BCL2;MBP	CSF1R;CORO1A;SYK;MBP;SASH3;BCL2	TNFAIP3;SYK;SASH3;CORO1A;CSF1R;MBP		CLDN5;ESAM;PECAM1;COL3A1;TLR4;KDR;LDB2;CD34;ADGRF5	WWTR1;ADGRF5;ESAM;COL3A1;PECAM1;TLR4;CDH5;NOS3;CLDN5;JAM2;KDR
GOBP_PYRIDINE_CONTAINING_COMPOUND_METABOLIC_PROCESS													1.316															2															PTGIS;NAMPT
GOBP_METHIONINE_BIOSYNTHETIC_PROCESS	1.779															2															ADI1;BHMT
GOBP_MYELOID_LEUKOCYTE_MIGRATION							1.876	7.502	7.236	4.129	3.106	5.074										5	14	13	9	7	9										MPP1;THBS1;ANXA1;NCKAP1L;PREX1	ANXA1;FOLR2;NCKAP1L;LGMN;CSF1R;SPI1;PREX1;S100A9;AIF1;FCER1G;SYK;ITGB2;MPP1;S100A8	S100A8;AIF1;S100A9;LGMN;CSF1R;FCER1G;NCKAP1L;FOLR2;SYK;PREX1;IL6RA;ITGB2;SPI1	RPS19;FCER1G;CSF1R;RAC2;SYK;ITGB2;LYN;ANXA1;AIF1	CSF1R;KIT;SYK;FCER1G;S100A8;AIF1;S100A9	AIF1;RAC2;S100A9;SYK;KIT;CSF1R;ITGB2;S100A8;FCER1G
GOBP_REGULATION_OF_REACTIVE_OXYGEN_SPECIES_METABOLIC_PROCESS	1.357						1.736	1.744	1.981	2.754	1.713	1.901				4						4	5	5	6	4	4				HP;MPV17L;CRP;SOD1						CYBA;TYROBP;GNAI2;THBS1	GNAI2;CYBA;SYK;TYROBP;ITGB2	TYROBP;SYK;CYBA;ITGB2;GNAI2	TYROBP;RAC2;SYK;ITGB2;FYN;BCL2	SYK;BCL2;TYROBP;FYN	TYROBP;SYK;RAC2;ITGB2
GOBP_REGULATION_OF_RESPONSE_TO_CYTOKINE_STIMULUS							2.818	2.115	2.393	3.233	2.164	3.134										6	6	6	7	5	6										IL1RN;LAPTM5;TLR2;AXL;CXCR4;KLF4	LAPTM5;KLF4;SAMHD1;PYCARD;SYK;AXL	TLR2;AXL;PYCARD;SYK;LAPTM5;KLF4	TLR2;PTPRC;TNFAIP3;SYK;LAPTM5;CXCR4;KLF4	SAMHD1;SYK;KLF4;PTPRC;LAPTM5	TNFAIP3;SYK;KLF4;TLR2;LAPTM5;PTPRC
GOBP_CHRONIC_INFLAMMATORY_RESPONSE							1.907	2.772	2.932		1.93	3.38										2	3	3		2	3										VCAM1;THBS1	VCAM1;S100A9;S100A8	VCAM1;S100A8;S100A9		S100A9;S100A8	S100A9;TNFAIP3;S100A8
GOBP_POSITIVE_REGULATION_OF_TRANSFORMING_GROWTH_FACTOR_BETA_PRODUCTION				1.912															2															LUM;THBS1
GOBP_NEGATIVE_REGULATION_OF_SIGNAL_TRANSDUCTION_BY_P53_CLASS_MEDIATOR										1.37	1.481														2	2														CD44;BCL2	CD44;BCL2
GOBP_MEMBRANE_RAFT_ORGANIZATION														1.772															3															CAV2;CAV1;ANXA2
GOBP_PEPTIDYL_TYROSINE_DEPHOSPHORYLATION											1.428	1.566														3	3														PTPN22;PTPRC;PTPN4	PTPN4;PTPN22;PTPRC
GOBP_REACTIVE_OXYGEN_SPECIES_METABOLIC_PROCESS	1.362				1.376		2.933	3.368	3.78	4.695	2.968	2.592				5				4		7	9	9	10	7	6				HP;MPV17L;CAT;CRP;SOD1				FBLN5;SOD3;PXDN;CRYAB		CYBB;NCF2;GNAI2;THBS1;CYBA;TYROBP;PREX1	GNAI2;CYBB;CYBA;PREX1;SYK;TYROBP;NCF2;LRRK2;ITGB2	NCF2;CYBB;TYROBP;LRRK2;SYK;CYBA;PREX1;ITGB2;GNAI2	NCF2;SESN1;RAC2;CYBB;TYROBP;SYK;ITGB2;NCF1;FYN;BCL2	CYBB;SYK;TYROBP;FYN;SESN1;NCF2;BCL2	RAC2;SYK;ITGB2;TYROBP;CYBB;NCF2
GOBP_CARDIAC_CHAMBER_DEVELOPMENT						1.885							1.445	2.703	2.409						4							4	9	8						TBX2;TPM1;ENG;ADAMTS1							BMP4;FKBP1A;ADGRG6;SMAD6	BMP4;MEF2C;ADGRG6;TGFBR3;GJA5;LUZP1;TEK;CPE;SMAD6	MEF2C;ENG;PLXND1;TGFBR3;NOS3;HEG1;SMAD6;ADAMTS1
GOBP_REGULATION_OF_INNATE_IMMUNE_RESPONSE								4.061	3.765	4.69	5.275	4.039											10	9	10	10	8											FCGR3;SAMHD1;ARRB2;IFI205;PYCARD;SPI1;HCK;TYROBP;SYK;VSIG4	FCGR3;FGR;TYROBP;PYCARD;ARRB2;SYK;VSIG4;HCK;SPI1	PTPN22;RPS19;TYROBP;TNFAIP3;SYK;NCF1;FGR;KLRK1;LYN;FYN	SAMHD1;RASGRP1;KLRK1;SYK;IFI205;FCGR3;FYN;PTPN22;GBP5;TYROBP	HCK;PTPN22;FGR;TNFAIP3;SYK;RASGRP1;TYROBP;KLRK1
GOBP_DENDRITIC_CELL_MIGRATION										1.427															2															CCR5;CXCR4
GOBP_REGULATION_OF_MITOTIC_CELL_CYCLE										1.546															8															BTG2;BTG1;ATM;CCND2;ANXA1;KLF4;AIF1;BCL2
GOBP_CELL_SUBSTRATE_ADHESION				9.211	10.133	8.887		2.954	1.846	1.582			10.27	10.043	7.808				15	17	14		11	8	7			18	25	21				FBLN1;COL1A1;FBLN2;LAMC1;FLNA;CCDC80;THBS1;THY1;FBLN5;ANTXR1;ITGA8;CD63;COL3A1;LAMB1;NID1	ANTXR1;ITGA9;COL1A1;LAMC1;SFRP1;NID1;LAMB1;FBLN1;FBLN5;CD63;FLNA;CCDC80;ITGA8;THY1;COL3A1;FBLN2;ACTN1	LAMC1;THY1;NID1;ACTN1;ITGA8;CD63;CCDC80;SERPINE1;LAMB1;ITGA1;ITGA9;COL1A1;ANTXR1;FBLN1		DAB2;PARVG;LIMS1;PREX1;MEGF9;MERTK;CD44;VCAM1;ITGB2;AXL;SRGAP2	VCAM1;SRGAP2;AXL;DAB2;PREX1;MERTK;ITGB2;PARVG	ITGAL;CD44;CORO1A;RAC2;ITGB2;FLNA;BCL2			ANGPT2;ITGA6;ADAM15;BCAM;ACVRL1;TIAM1;ADAMTS9;VWF;LIMCH1;LAMB2;SMAD6;COL3A1;NEDD9;FBLN2;CD34;COL8A1;NID1;PDGFB	ACVRL1;ITGA6;ADAM15;COL8A1;TIAM1;VCAM1;DLC1;PDGFB;ABI3BP;FBLN2;NID1;ACTN1;KDR;ITGA9;ADAMTS9;SMAD6;CDH13;SPRY4;BCAM;DAB2;VWF;LAMB2;TEK;COL3A1;CD34	VWF;PXN;ADAM15;SMAD6;ACVRL1;ITGA6;CDH13;PDGFB;ITGA5;SERPINE1;VCAM1;ABI3BP;KDR;DAB2;ITGA9;ACTN1;LIMCH1;NEDD9;NID1;COL3A1;PEAK1
GOBP_REGULATION_OF_DEPHOSPHORYLATION							1.853															4															PLEK;NCKAP1L;GNAI2;FKBP1A
GOBP_NATURAL_KILLER_CELL_ACTIVATION									2.108	4.985	6.645	8.306												4	7	8	9												AXL;TYROBP;MERTK;FGR	IL2RB;PTPRC;CORO1A;TYROBP;FGR;KLRK1;PTPN22	TOX;RASGRP1;CORO1A;IL2RB;PTPN22;PTPRC;KLRK1;TYROBP	FGR;PTPN22;RASGRP1;CORO1A;IL2RB;TYROBP;PTPRC;KLRK1;TOX
GOBP_POSITIVE_REGULATION_OF_ORGANELLE_ORGANIZATION								1.711			1.416	1.64											10			7	7											ANXA1;NCKAP1L;GZMB;CCDC88A;WAS;PYCARD;HCK;PLEK;WASF2;CDC42EP3			EVL;CCDC88A;PLEK;PRKCQ;PIP4K2A;ATM;GZMB	HCK;PRKCQ;CCDC88A;ATM;PIP4K2A;EVL;HCLS1
GOBP_POSITIVE_REGULATION_OF_CELLULAR_AMIDE_METABOLIC_PROCESS							2.189															5															PKM;PTAFR;IFNGR1;THBS1;VIM
GOBP_PROGRAMMED_CELL_DEATH							2.602	5.281	6.138	7.333	6.157	7.233		1.614	2.281							21	36	35	36	30	30		33	34							SGK1;GADD45B;TYROBP;CTSH;ANXA1;TLR2;SLC40A1;HCLS1;PRKCB;DUSP6;CTSB;PKM;GNAI2;THBS1;NCKAP1L;AXL;HMOX1;KLF4;PPT1;LAPTM5;CXCR4	DUSP6;KLF4;CSF1R;UCP2;ASAH1;PYCARD;SPI1;CD44;MERTK;LAPTM5;GZMB;PKM;CD5L;ARRB2;IFI205;AIF1;LRRK2;AXL;CTSH;PPT1;ANXA1;CTSB;NCKAP1L;GNAI2;HCK;S100A9;EPB41L3;S100A8;SLC40A1;LGMN;DAB2;STK17B;SYK;TYROBP;ITGB2;PRKCB	S100A9;AXL;ARRB2;DAB2;NCKAP1L;CD5L;HCK;GNAI2;AIF1;SLC40A1;PYCARD;PKM;LRRK2;SYK;GADD45B;STK17B;ASAH1;S100A8;PRKCB;TLR2;EPB41L3;HCLS1;PPT1;LGMN;SGK1;IL6RA;ITGB2;CSF1R;TYROBP;UCP2;MERTK;LAPTM5;CTSB;KLF4;SPI1	TLR2;IL2RB;NFKB1;STK17B;LAPTM5;SGK1;CXCR4;AIF1;BCL2;CD44;BTG2;CSF1R;TYROBP;TNFAIP3;BTG1;ANXA1;GADD45B;CYFIP2;FLNA;CCND2;TMC8;CORO1A;PRKCH;SYK;ATM;HCLS1;NCF1;LYN;CCR5;SEMA4D;PTPRC;TNFAIP8;SH3KBP1;ITGB2;PRKCB;KLF4	SRGN;KIT;CYFIP2;SYK;LCK;IFI205;S100A8;CCR5;AIF1;GZMB;PRKCB;CORO1A;STK17B;IL2RB;PRKCQ;LAPTM5;SH3KBP1;FLNA;CCND2;KLF4;SEMA4D;PTPRC;S100A9;PRKCH;TNFAIP8;TYROBP;BCL2;CSF1R;ATM;CD44	PRKCQ;S100A9;CYFIP2;SYK;PRKCH;CSF1R;SH3KBP1;LAPTM5;LCK;AIF1;ITGB2;CORO1A;TMC8;KLF4;SGK1;PRKCB;HCLS1;HCK;GADD45B;KIT;CCR5;SEMA4D;ATM;TNFAIP3;STK17B;IL2RB;TYROBP;TLR2;PTPRC;S100A8		ITGA6;ADAM15;MEF2C;ACKR3;DLC1;DLL1;AKAP12;MECOM;BMP4;RFK;KLF4;UACA;RPS6KA2;PCGF2;KDR;APP;SMAD6;PLAC8;DAB2;RAMP2;YBX3;CAV1;IGFBP3;SEMA6A;EDNRB;PEA15A;GIMAP8;PTGIS;MAPK7;NES;TEK;ACTN1;DNASE1L3	UACA;PLAC8;PTGIS;IGFBP3;ADAM15;SMAD6;ITGA6;DNASE1L3;MEF2C;MAPK7;SEMA6A;DLL1;HIC1;AQP1;FLT4;ITGA5;RAMP2;TCIM;LGMN;ENG;RPS6KA2;SERPINE1;NOS3;SGK1;ICAM1;KDR;AKAP12;DAB2;GNAI2;PEA15A;ACTN1;GIMAP8;CDH5;KLF4
GOBP_ENDODERM_DEVELOPMENT				4.815	3.311	2.797							2.283						6	5	4							4						COL4A2;MMP2;LAMC1;COL6A1;COL5A1;LAMB1	LAMC1;LAMB1;MMP2;COL6A1;COL5A1	COL6A1;LAMC1;COL5A1;LAMB1							COL4A2;COL8A1;BMP4;SOX17
GOBP_T_CELL_RECEPTOR_SIGNALING_PATHWAY								1.388	1.567	1.671	3.398	2.854											4	4	4	6	5											THEMIS2;LAPTM5;FYB;ICOSL	ICOSL;FYB;THEMIS2;LAPTM5	LAPTM5;PTPN22;FYN;PTPRC	FYB;LCK;FYN;PTPRC;PTPN22;LAPTM5	PTPN22;FYB;LAPTM5;PTPRC;LCK
GOBP_REGULATION_OF_INTEGRIN_MEDIATED_SIGNALING_PATHWAY				2.064	1.913														2	2														CD63;FLNA	CD63;FLNA
GOBP_RECEPTOR_SIGNALING_PATHWAY_VIA_STAT										1.858	1.532	1.704													5	4	4													CSF1R;PTPRC;HCLS1;LYN;FYN	CSF1R;KIT;PTPRC;FYN	KIT;HCLS1;PTPRC;CSF1R
GOBP_GLOMERULAR_BASEMENT_MEMBRANE_DEVELOPMENT													2.028	1.504														2	2														LAMB2;NID1	LAMB2;NID1
GOBP_DEVELOPMENTAL_MATURATION														1.545															9															EDNRB;ACVRL1;KLF2;TAL1;PALM;RELN;RPS6KA2;KDR;APP
GOBP_REGULATION_OF_NOTCH_SIGNALING_PATHWAY															1.807															5															TCIM;EGFL7;POSTN;NOS3;DLL1
GOBP_REGULATION_OF_TUBE_SIZE	1.327			1.971	2.412	1.431										4			4	5	3										CRP;FGG;SOD1;FGB			ACTA2;MMP2;EDNRB;PRKG1	EDNRB;MMP2;ACTA2;SOD3;PRKG1	SOD3;ITGA1;AGTR1A
GOBP_CELL_CELL_ADHESION				2.064	2.345	2.274	5.257	7.65	4.897	9.531	13.119	10.278	1.656	3.688	4.824				10	12	10	19	28	21	28	30	25	11	26	27				COL14A1;FLNA;GPC6;KLF4;LAMB1;THY1;ITGA8;CSRP1;SPARCL1;PRKG1	ITGA9;COL14A1;PRKG1;SPARCL1;LAMB1;KLF4;FLNA;ITGA8;THY1;MYL9;GPC6;ACTN1	C1QTNF1;THY1;ACTN1;ITGA8;KLF4;LAMB1;GPC6;ITGA1;ITGA9;CSRP1	CD93;IL1RN;SELL;PLEK;ANXA1;VCAM1;CD84;CD83;FGL2;PTAFR;FBLIM1;NCKAP1L;RAP2B;KLF4;ICOSL;LAPTM5;S100A11;LIMS1;VSIR	PTAFR;S100A11;VSIR;KLF4;FCGR3;FGL2;PYCARD;SPI1;PLEK;CD44;VSIG4;MAP3K8;LAPTM5;AIF1;ANXA1;NCKAP1L;CD83;S100A9;ICOSL;VCAM1;CD84;S100A8;RAP2B;LIMS1;FBLIM1;SYK;ITGB2;CD86	VCAM1;CD55;S100A9;ICOSL;NCKAP1L;SELL;FCGR3;AIF1;PYCARD;S100A11;SYK;S100A8;RAP2B;ITGB2;FGL2;VSIG4;LAPTM5;VSIR;KLF4;CD84;SPI1	ITGAL;ETS1;LAPTM5;PTPN22;AIF1;BCL2;MBP;CD44;RAC2;STK10;FGL2;ANXA1;CD83;PLEK;CYFIP2;FLNA;CORO1A;SASH3;SYK;KLRK1;LYN;FYN;SEMA4D;AKNA;PTPRC;ITGB2;S100A11;KLF4	ETS1;KIT;CD83;CYFIP2;SYK;LCK;FCGR3;PTPN22;S100A8;AIF1;RASGRP1;AKNA;CORO1A;PRKCQ;LAPTM5;KLRK1;SASH3;FLNA;PLEK;KLF4;SEMA4D;FYN;S100A11;MBP;PTPRC;S100A9;BCL2;STK10;CD44;FGL2	PRKCQ;S100A9;CYFIP2;SYK;LAPTM5;LCK;STK10;AIF1;RAC2;FGL2;CORO1A;ITGB2;KLF4;KLRK1;KIT;SASH3;SEMA4D;PTPN22;ITGAL;RASGRP1;MBP;PTPRC;S100A8;AKNA;S100A11	ITGA6;BMP4;ANXA2;KLF4;CSRP1;PCDH17;ICAM1;ANXA1;CD34;SLC7A1;SPARCL1	TMEM47;ITGA6;PCDH17;SPARCL1;EFNB2;VCAM1;TMOD3;ANXA2;BMP4;ESAM;KLF4;ACTN1;ITGA9;SLC7A1;CDH13;SELP;PECAM1;PTPRM;PCDH12;MMRN1;CAV1;CLDN5;MAPK7;FCGR3;CD34;CNN3	CLEC4G;CLDN5;ITGA6;ANXA2;C1QTNF1;MAPK7;CDH13;CSRP1;SELP;ROBO4;PTPRM;PCDH17;ITGA5;ESAM;TMEM47;ICAM1;PCDH12;CNN3;VCAM1;CD55;ITGA9;PECAM1;ACTN1;CDH5;FCGR3;JAM2;KLF4
GOBP_CYTOPLASMIC_TRANSLATION										7.686															11															RPS19;RPL13;RPL10A;RPLP2;RPL27;RPS18;RPS14;RPL27A;RPS15A;RPL18;RPS12
GOBP_PROGRAMMED_CELL_DEATH_INVOLVED_IN_CELL_DEVELOPMENT											2.067															2															KIT;BCL2
GOBP_DEVELOPMENTAL_PIGMENTATION				1.393							2.083	1.356		1.863					2							3	2		4					CD63;EDNRB							ZEB2;KIT;BCL2	KIT;ZEB2		MEF2C;ADAMTS9;ZEB2;EDNRB
GOBP_IMMUNE_SYSTEM_DEVELOPMENT							4.471	6.779	5.629	9.792	11.218	9.131		2.421	1.976							18	27	23	29	28	24		23	20							PLEK;CD83;C1QC;FGL2;ANXA1;TLR2;SLC40A1;VCAM1;PLD4;NFAM1;HCLS1;NCKAP1L;AXL;TYROBP;IRF8;KLF4;PREX1;VSIR	VSIR;TET2;KLF4;FCGR3;FGL2;CSF1R;SPI1;C1QC;PLEK;IRF8;MERTK;FCER1G;AXL;ANXA1;NCKAP1L;CD83;PLD4;VCAM1;SLC40A1;NFAM1;JARID2;SAMHD1;PREX1;SYK;TYROBP;WASF2;CD86	VCAM1;AXL;NCKAP1L;JARID2;FCGR3;SLC40A1;SYK;NFAM1;TLR2;HCLS1;FCER1G;C1QC;IRF8;IL6RA;PLD4;CSF1R;TYROBP;PREX1;FGL2;MERTK;VSIR;KLF4;SPI1	TLR2;ETS1;PTPN22;BCL2;JARID2;CSF1R;TCF7;TYROBP;TNFAIP3;PIP4K2A;KLF2;FGL2;RPS14;ANXA1;CD83;PLEK;SASH3;SYK;ATM;HCLS1;TET2;LYN;PABPC4;RPS19;FCER1G;PTPRC;PBXIP1;IKZF1;KLF4	ETS1;KIT;CD83;SYK;LCK;FCER1G;KLF2;FCGR3;PTPN22;TOX;RASGRP1;SAMHD1;TET2;PIP4K2A;SASH3;IKZF1;LTB;JARID2;PLEK;PBXIP1;KLF4;PTPRC;TYROBP;BCL2;CSF1R;TCF7;ATM;FGL2	PBXIP1;IKZF1;SYK;CSF1R;LCK;TCF7;PIP4K2A;FGL2;KLF4;LTB;HCLS1;FCER1G;KIT;SASH3;KLF2;TOX;PTPN22;ATM;TNFAIP3;RASGRP1;TYROBP;TLR2;PTPRC;JARID2		TAL1;EPOR;MEF2C;TGFBR3;VCAM1;TMOD3;ANXA2;PDGFB;DLL1;ADGRF5;MECOM;BMP4;KLF4;MEIS2;ACTN1;KDR;SNRK;APP;KLF2;TLR4;TEK;FCGR3;CD34	ANXA2;EPOR;MEF2C;PDGFB;DLL1;FLT4;TCIM;TGFBR3;FLT1;VCAM1;ADGRF5;KDR;SNRK;TAL1;ACTN1;CEBPD;KLF2;TLR4;FCGR3;KLF4
GOBP_EPITHELIAL_CELL_DIFFERENTIATION													6.008	5.04	6.332													17	24	25													SPRY1;COL4A1;BMP4;VIM;GJA1;KLF4;DLL1;PDGFB;TAGLN2;ICAM1;LAMB2;ACVRL1;ANXA1;CD34;APOLD1;TIE1;SOX17	UGCG;ACVRL1;MEF2C;KLF7;TAGLN2;PDGFB;DLL1;MAF;BMP4;KLF4;KDR;PECAM1;TIE1;DAB2;VIM;CAV1;APOLD1;EDNRB;KLF2;KDM6B;CLDN5;LAMB2;CD34;CNN3	KLF7;APOLD1;HEG1;CLDN5;ACVRL1;MEF2C;PDGFB;ROBO4;TAGLN2;DLL1;WWTR1;MAF;SERPINE1;ICAM1;CNN3;KDR;DAB2;SOX17;PECAM1;KDM6B;KLF2;VIM;TIE1;CDH5;KLF4
GOBP_INFLAMMATORY_CELL_APOPTOTIC_PROCESS										1.664															2															CCR5;ANXA1
GOBP_LAMELLIPODIUM_ORGANIZATION								3.212		1.352	1.509	1.659											6		3	3	3											PLEKHO1;CCDC88A;WAS;CD44;WASF2;SRGAP2		CD44;RAC2;CCDC88A	KIT;CCDC88A;CD44	RAC2;KIT;CCDC88A
GOBP_HISTONE_PHOSPHORYLATION												1.405															2															PRKCB;ATM
GOBP_POSITIVE_REGULATION_OF_NEURON_DEATH								1.734	1.934	2.032	2.25	1.682											4	4	4	4	3											ITGB2;C1QA;FCGR3;TYROBP	ITGB2;FCGR3;C1QA;TYROBP	ATM;ITGB2;TYROBP;FYN	TYROBP;FCGR3;ATM;FYN	TYROBP;ITGB2;ATM
GOBP_POSITIVE_REGULATION_OF_EXECUTION_PHASE_OF_APOPTOSIS														1.691															2															DLC1;PTGIS
GOBP_REGULATION_OF_MIRNA_TRANSCRIPTION													2.531	1.576														4	4														KLF4;BMP4;PDGFB;SMAD6	PDGFB;BMP4;KLF4;SMAD6
GOBP_POSITIVE_REGULATION_OF_CELL_ADHESION_MEDIATED_BY_INTEGRIN								1.476	1.596														2	2														SYK;NCKAP1L	NCKAP1L;SYK
GOBP_POSITIVE_REGULATION_OF_RESPONSE_TO_CYTOKINE_STIMULUS							2.674		1.612	1.696												4		3	3												TLR2;AXL;LAPTM5;CXCR4		AXL;TLR2;LAPTM5	LAPTM5;TLR2;CXCR4
GOBP_CELLULAR_RESPONSE_TO_REACTIVE_OXYGEN_SPECIES				1.378	2.443					1.5					1.748				3	5					4					6				TPM1;MMP2;FBLN5	FOS;FBLN5;MMP2;TPM1;SOD3					KLF2;NCF1;TNFAIP3;ANXA1					MAPK7;KDM6B;KLF2;NOS3;PXN;AQP1
GOBP_CELL_MATRIX_ADHESION				3.48	4.419	4.483							4.857	6.02	5.924				7	9	8							10	16	15				THBS1;THY1;ITGA8;FBLN5;CD63;COL3A1;NID1	ITGA9;NID1;SFRP1;FBLN5;CD63;ITGA8;THY1;COL3A1;ACTN1	THY1;NID1;ACTN1;ITGA8;CD63;SERPINE1;ITGA1;ITGA9							ITGA6;ADAM15;BCAM;TIAM1;ADAMTS9;LIMCH1;ACVRL1;COL3A1;CD34;NID1	CDH13;ACVRL1;ITGA6;ADAM15;ADAMTS9;BCAM;TIAM1;VCAM1;TEK;DLC1;NID1;KDR;ITGA9;COL3A1;ACTN1;CD34	ITGA5;CDH13;ITGA9;ACTN1;SERPINE1;KDR;ADAM15;ACVRL1;ITGA6;PXN;LIMCH1;NID1;COL3A1;VCAM1;PEAK1
GOBP_CELLULAR_DEFENSE_RESPONSE								2.46	1.791	2.745	2.974	2.22											4	3	4	4	3											CD5L;TYROBP;NCF2;IFI205	NCF2;CD5L;TYROBP	NCF2;CCR5;TYROBP;NCF1	IFI205;NCF2;CCR5;TYROBP	TYROBP;NCF2;CCR5
GOBP_REGULATION_OF_ACTIN_FILAMENT_ORGANIZATION				1.361	2.128		2.558	4.075	3.863	2.745	2.534	2.854							4	6		7	11	10	8	7	7							SEMA5A;FLNA;TPM1;CDC42EP3	SFRP1;SEMA5A;FLNA;TPM1;CDC42EP3;RGS4		PLEK;ARPC1B;COTL1;TMSB10;HCLS1;NCKAP1L;CDC42EP3	NCKAP1L;ARPC1B;CCDC88A;TMSB10;WAS;PYCARD;HCK;PLEK;COTL1;WASF2;CDC42EP3	WAS;COTL1;CCDC88A;HCLS1;ARHGEF10L;PYCARD;NCKAP1L;TMSB10;ARPC1B;HCK	CORO1A;COTL1;CCDC88A;HCLS1;CYFIP2;PLEK;FLNA;EVL	EVL;CCDC88A;CYFIP2;CORO1A;COTL1;FLNA;PLEK	HCK;CCDC88A;CYFIP2;COTL1;CORO1A;EVL;HCLS1
GOBP_NEURON_PROJECTION_REGENERATION				3.091	2.719	1.312				1.71	1.886								4	4	2				3	3								FLNA;THY1;MMP2;KLF4	MMP2;THY1;FLNA;KLF4	THY1;KLF4				FLNA;KLF4;BCL2	FLNA;KLF4;BCL2
GOBP_REGULATION_OF_INTRINSIC_APOPTOTIC_SIGNALING_PATHWAY								1.505			2.099												5			5												PYCARD;S100A9;CD44;LRRK2;S100A8			LCK;S100A8;S100A9;CD44;BCL2
GOBP_MYELOID_CELL_DEVELOPMENT							1.697		1.427	3.086	2.462	3.661		2.613	1.516							3		3	5	4	5		6	4							TLR2;TYROBP;NCKAP1L		NCKAP1L;TLR2;TYROBP	TLR2;TYROBP;PIP4K2A;KLF2;PABPC4	KIT;KLF2;PIP4K2A;TYROBP	PIP4K2A;KIT;TYROBP;TLR2;KLF2		TAL1;KLF2;APP;TMOD3;ANXA2;ADGRF5	ANXA2;TAL1;KLF2;ADGRF5
GOBP_RESPONSE_TO_NITROGEN_COMPOUND				1.972	2.171		2.214	3.382	3.755	5.608	2.816	2.897							11	13		14	22	21	24	16	15							COL1A1;MMP2;FBN1;FLNA;COL1A2;COL6A1;IGFBP5;VIM;COL3A1;COL4A1;EDNRB	EDNRB;COL1A1;VIM;SFRP1;FOS;FLNA;RGS4;COL1A2;MMP2;FBN1;COL6A1;COL3A1;IGFBP5		PRKCB;NAMPT;CYBB;RGS10;PKM;ANXA1;PTAFR;TLR2;GNAI2;VCAM1;CYBA;RAB31;VIM;CXCR4	PTAFR;RGS10;FCGR3;UCP2;PKM;ARRB2;FCER1G;AIF1;NAMPT;LRRK2;ANXA1;FOLR2;RAB31;GNAI2;CYBA;VCAM1;VIM;LGMN;CYBB;SYK;ITGB2;PRKCB	VCAM1;VIM;ARRB2;GNAI2;FCGR3;AIF1;PKM;LRRK2;SYK;CYBA;RGS10;RAB31;PRKCB;NAMPT;TLR2;LGMN;FCER1G;FOLR2;ITGB2;CYBB;UCP2	TLR2;NFKB1;CYBB;CXCR4;PTPN22;AIF1;BTG2;TNFAIP3;BTG1;PIP4K2A;KLF2;LEPROTL1;ANXA1;FLNA;VIM;SESN1;GNG2;SYK;LYN;FYN;FCER1G;ITGB2;RAB31;PRKCB	CYBB;PRKCB;FLNA;SYK;RAB31;KLF2;FCGR3;VIM;FCER1G;FYN;SESN1;PTPN22;PRKCQ;GNG2;PIP4K2A;AIF1	AIF1;GNG2;PTPN22;PRKCQ;TNFAIP3;VIM;SYK;PIP4K2A;ITGB2;CYBB;TLR2;FCER1G;PRKCB;RAB31;KLF2
GOBP_SCHWANN_CELL_DIFFERENTIATION													1.362	1.451														2	3														LAMB2;ADGRG6	ADGRG6;SKI;LAMB2
GOBP_REGULATION_OF_MELANOCYTE_DIFFERENTIATION											2.596			1.867												2			2												ZEB2;BCL2			ZEB2;ADAMTS9
GOBP_POSITIVE_REGULATION_OF_RHO_PROTEIN_SIGNAL_TRANSDUCTION													1.426															2															COL3A1;ADGRG1
GOBP_MESODERM_DEVELOPMENT								1.306				1.325	1.726		1.395								4				3	4		5								KDM6B;KLF4;HCK;SECTM1A				IKZF1;HCK;KLF4	GJA1;KLF4;BMP4;TIE1		TAL1;ETS2;KDM6B;TIE1;KLF4
GOBP_TYPE_I_INTERFERON_PRODUCTION									2.646	1.343		1.649												5	3		3												TLR2;PYCARD;IRF8;SYK;REL	PTPN22;TLR2;SYK		TLR2;SYK;PTPN22
GOBP_REGULATION_OF_T_CELL_DIFFERENTIATION							2.262	2.919	1.318	3.384	4.6	4.11										5	7	4	7	8	7										CD83;FGL2;ANXA1;NCKAP1L;VSIR	ANXA1;VSIR;NCKAP1L;CD83;FGL2;SYK;CD86	NCKAP1L;VSIR;SYK;FGL2	PTPRC;TCF7;SYK;SASH3;FGL2;ANXA1;CD83	CD83;RASGRP1;SYK;TCF7;PTPRC;TOX;FGL2;SASH3	SYK;RASGRP1;SASH3;FGL2;PTPRC;TCF7;TOX
GOBP_NEGATIVE_REGULATION_OF_PHAGOCYTOSIS									1.596															2															FCGR3;TLR2
GOBP_REGULATION_OF_BLOOD_PRESSURE				1.728	1.527		1.454						1.919	3.764	2.877				4	4		4						5	11	9				ACTA2;TPM1;EDNRB;COL1A2	EDNRB;ACTA2;COL1A2;TPM1		CYBA;PTAFR;SGK1;HMOX1						SGK1;DLL1;ACVRL1;CD34;PDGFB	EDNRB;ACVRL1;NPR1;PRCP;PTGS1;GJA5;RAMP2;RPS6KA2;PDGFB;CD34;DLL1	RAMP2;PDGFB;RPS6KA2;NOS3;DLL1;SGK1;ACVRL1;PRCP;PTGS1
GOBP_SEQUESTERING_OF_ZINC_ION								2.102	2.228		2.399	2.575											2	2		2	2											S100A9;S100A8	S100A8;S100A9		S100A9;S100A8	S100A9;S100A8
GOBP_REGULATION_OF_MRNA_CATABOLIC_PROCESS										1.797															5															BTG2;SLC11A1;VIM;TENT5C;PABPC4
GOBP_FIBROBLAST_MIGRATION				1.405															2															THBS1;ACTA2
GOBP_REGULATION_OF_EXTRINSIC_APOPTOTIC_SIGNALING_PATHWAY										1.395					1.606										4					6										TMC8;TNFAIP3;BCL2;PTPRC					MAPK7;PEA15A;SERPINE1;NOS3;ICAM1;ITGA6
GOBP_MORPHOGENESIS_OF_AN_ENDOTHELIUM													1.767															2															BMP4;ACVRL1
GOBP_ELASTIC_FIBER_ASSEMBLY				2.268	5.095	2.234													2	4	2													COL3A1;FBLN5	MFAP4;FBLN5;COL3A1;MYH11	MYH11;MFAP4
GOBP_NIK_NF_KAPPAB_SIGNALING									1.449															4															LAPTM5;REL;TLR2;SPI1
GOBP_POSITIVE_REGULATION_OF_LOCOMOTION				4.521	2.6	2.902	2.826	3.363	2.942	3.693	2.322	2.672	3.298	4.203	9.87				12	10	9	11	15	13	14	10	10	12	21	29				COL1A1;MMP2;CCBE1;SPARC;ACTA2;IGFBP5;THBS1;THY1;SEMA5A;CAVIN1;ADAMTS1;LAMB1	CAVIN1;COL1A1;LAMB1;SEMA5A;SPARC;CCBE1;MMP2;THY1;ACTA2;IGFBP5	IGFBP5;MCAM;SPARC;THY1;SERPINE1;ADAMTS1;LAMB1;CCBE1;COL1A1	CTSH;PTAFR;ANXA1;GNAI2;GLIPR2;S100A11;THBS1;NCKAP1L;CXCR4;HMOX1;VSIR	ANXA1;PTAFR;S100A11;VSIR;NCKAP1L;LGMN;DAB2;GLIPR2;CSF1R;GNAI2;PYCARD;SPI1;AIF1;CTSH;SRGAP2	GNAI2;SRGAP2;AIF1;FGR;LGMN;CSF1R;PYCARD;DAB2;NCKAP1L;S100A11;IL6RA;VSIR;SPI1	SEMA4D;CSF1R;ETS1;PTPRC;CORO1A;RAC2;ATM;FGR;CXCR4;ANXA1;S100A11;LYN;AIF1;BCL2	CSF1R;KIT;ETS1;CORO1A;SEMA4D;S100A11;PTPRC;ATM;AIF1;BCL2	AIF1;FGR;RAC2;ATM;KIT;CSF1R;CORO1A;PTPRC;S100A11;SEMA4D	ITGA6;BMP4;RHOJ;CAVIN1;TIAM1;SPARC;ICAM1;HDAC7;ANXA1;NEDD9;APP;PDGFB	ITGA6;ACKR3;TIAM1;PDGFB;AKAP12;BMP4;RIPOR1;RELN;KDR;APP;CDH13;SELP;PECAM1;DAB2;SPARC;CAVIN1;CAV1;SEMA6A;TLR4;TEK;HDAC7	PLVAP;MYO1C;ITGA6;RELN;RIPOR1;SPARC;CDH13;SEMA6A;PDGFB;SELP;FLT4;ITGA5;LGMN;SERPINE1;NOS3;FLT1;MCAM;ICAM1;ADAMTS1;KDR;AKAP12;DAB2;GNAI2;SEMA3F;PECAM1;TLR4;CDH5;NEDD9;JAM2
GOBP_MAINTENANCE_OF_LOCATION										1.767	3.219	2.37													7	9	7													PTPRC;NFKB1;CORO1A;CCDC88A;LYN;FLNA;CCR5	SRGN;CCDC88A;CORO1A;FLNA;LCK;PTPRC;S100A8;CCR5;S100A9	CCDC88A;S100A9;CORO1A;S100A8;PTPRC;LCK;CCR5
GOBP_NEGATIVE_REGULATION_OF_ANTIGEN_PROCESSING_AND_PRESENTATION							2.429	2.201	2.336		2.497											2	2	2		2											FGL2;THBS1	FCGR3;FGL2	FCGR3;FGL2		FCGR3;FGL2
GOBP_PRODUCTION_OF_MOLECULAR_MEDIATOR_INVOLVED_IN_INFLAMMATORY_RESPONSE										3.709	1.548	1.704													6	3	3													RPS19;PBXIP1;SYK;ALOX5AP;NCF1;LYN	SYK;PBXIP1;GBP5	PBXIP1;SYK;ALOX5AP
GOBP_T_CELL_MEDIATED_CYTOTOXICITY							1.375	2.792			1.375											2	4			2											CTSH;NCKAP1L	STX7;CTSH;FCGR3;NCKAP1L			PTPRC;FCGR3
GOBP_TRABECULA_FORMATION				2.889	2.6	1.821	1.634						1.551	1.746					3	3	2	2						2	3					ADAMTS1;COL1A1;MMP2	MMP2;COL1A1;SFRP1	COL1A1;ADAMTS1	SLC40A1;FKBP1A						FKBP1A;ADGRG6	ADGRG6;TGFBR3;TEK
GOBP_GLAND_MORPHOGENESIS	1.463				1.881											4				4											PROX1;CPB2;AR;FGL1				TBX2;IGFBP5;SFRP1;MMP2
GOBP_SYNAPSE_PRUNING							3.474	3.193	3.365													3	3	3													C1QA;C1QB;C1QC	C1QC;C1QA;C1QB	C1QB;C1QA;C1QC
GOBP_TYPE_B_PANCREATIC_CELL_DEVELOPMENT													1.616															2															BMP4;DLL1
GOBP_CELL_FATE_COMMITMENT_INVOLVED_IN_FORMATION_OF_PRIMARY_GERM_LAYER													2.295		1.625													3		3													KLF4;BMP4;SOX17		ETS2;SOX17;KLF4
GOBP_POSITIVE_REGULATION_OF_WNT_SIGNALING_PATHWAY									1.341	2.026		1.846												4	5		4												DAB2;TLR2;ZEB2;LRRK2	TLR2;NFKB1;PBXIP1;TNFAIP3;RPS12		TNFAIP3;PBXIP1;TLR2;ZEB2
GOBP_INOSITOL_PHOSPHATE_BIOSYNTHETIC_PROCESS							1.563															2															PLEK;PTAFR
GOBP_REGULATION_OF_ACTIN_FILAMENT_LENGTH							3.614	4.351	3.937	2.571	2.209	3.205		1.469								7	9	8	6	5	6		6								PLEK;ARPC1B;COTL1;TMSB10;HCLS1;NCKAP1L;CDC42EP3	NCKAP1L;ARPC1B;TMSB10;WAS;PYCARD;HCK;PLEK;COTL1;CDC42EP3	WAS;COTL1;HCLS1;PYCARD;NCKAP1L;TMSB10;ARPC1B;HCK	CORO1A;COTL1;HCLS1;CYFIP2;PLEK;EVL	EVL;CYFIP2;CORO1A;COTL1;PLEK	HCK;CYFIP2;COTL1;CORO1A;EVL;HCLS1		ADD3;ESAM;CDC42EP3;TMSB10;TMOD3;DSTN
GOBP_REGULATION_OF_PROTEIN_TARGETING_TO_MEMBRANE										1.352															2															FYN;ITGB2
GOBP_CELLULAR_RESPONSE_TO_LOW_DENSITY_LIPOPROTEIN_PARTICLE_STIMULUS								2.634	2.808	2.854	1.856	3.255											3	3	3	2	3											ITGB2;FCER1G;SYK	ITGB2;SYK;FCER1G	ITGB2;FCER1G;SYK	FCER1G;SYK	SYK;FCER1G;ITGB2
GOBP_REGULATION_OF_CELL_SUBSTRATE_JUNCTION_ORGANIZATION														1.467	1.572														4	4														KDR;ACVRL1;TEK;DLC1	ACVRL1;KDR;PEAK1;LIMCH1
GOBP_FACE_DEVELOPMENT				1.378															2															COL1A1;MMP2
GOBP_REGULATION_OF_NEURON_PROJECTION_DEVELOPMENT				1.648	1.758					1.632	2.461	1.805							6	7					8	9	7							FLNA;ITM2C;KLF4;SEMA5A;THY1;VIM	VIM;SFRP1;KLF4;SEMA5A;FLNA;THY1;ITM2C					KLF4;SEMA4D;CCDC88A;LYN;FLNA;FYN;VIM;MBP	CCDC88A;FLNA;VIM;SEMA4D;KLF4;FYN;MBP;S100A9;TOX	CCDC88A;S100A9;VIM;KLF4;MBP;TOX;SEMA4D
GOBP_CELLULAR_HOMEOSTASIS									2.188			2.287												15			12												TBXAS1;SLC11A1;FPR1;S100A8;CD55;SLC31A2;S100A9;PRKCB;CD52;PPT1;SLC40A1;UCP2;LRRK2;CYBA;HK3			FPR1;SLC11A1;CD52;S100A9;HK3;CORO1A;LCK;PTPRC;S100A8;PRKCB;PTGER2;CCR5
GOBP_GLYCEROL_3_PHOSPHATE_METABOLIC_PROCESS								2.018															2															GPAT3;GK
GOBP_ALPHA_BETA_T_CELL_PROLIFERATION									2.072	2.142	2.323	2.512												3	3	3	3												CD55;VSIR;SYK	PTPN22;SYK;PTPRC	SYK;PTPRC;PTPN22	SYK;PTPN22;PTPRC
GOBP_GROWTH					1.817					1.352		1.774	2.965	1.397	1.663					11					12		11	15	19	19					SFRP1;FBLN5;TBX2;LTBP4;SEMA5A;RGS4;FHL1;IGFBP7;CRYAB;COL3A1;IGFBP5					TMC8;SASH3;BTG1;ATM;KLF2;ANXA1;CXCR4;SGK1;CYFIP2;SEMA4D;BCL2;JARID2		PRKCQ;ATM;S100A9;CYFIP2;SASH3;SGK1;TMC8;S100A8;JARID2;KLF2;SEMA4D	SPRY1;SGK1;BMP4;GJA1;ADAM15;IGFBP7;DLL1;LTBP4;LAMB2;ACVRL1;ANXA1;NEDD9;COL3A1;APP;SOX17	ACVRL1;ADAM15;MEF2C;TGFBR3;FHL1;DLL1;BMP4;IGFBP7;APP;NPR1;PLAC8;DAB2;YBX3;LTBP4;SEMA6A;KLF2;LAMB2;NRN1;COL3A1	ECM1;PLAC8;HEG1;ADAM15;ACVRL1;MEF2C;SEMA6A;DLL1;WWTR1;LGMN;TGFBR3;SGK1;NEDD9;DAB2;SOX17;SEMA3F;KLF2;IGFBP7;COL3A1
GOBP_RESPONSE_TO_OXIDATIVE_STRESS	1.537				2.307					2.124					1.622	8				8					9					11	HP;VNN1;TAT;FABP1;CAT;MGST1;SOD1;IDH1				COL1A1;PXDN;FOS;FBLN5;MMP2;CRYAB;TPM1;SOD3					SESN1;TNFAIP3;BTG1;KLF2;NCF1;ANXA1;FYN;AIF1;BCL2					PXDN;MAPK7;SELENON;AQP1;KDM6B;KLF2;TLR4;NCOA7;NOS3;PXN;PTGS1
GOBP_PHOSPHORYLATION								1.733	3.748	3.821	2.765	6.197		1.659	3.465								25	29	28	22	28		33	38								DUSP6;CSF1R;PYCARD;CD44;MERTK;MAP3K8;PKM;ARRB2;GK;AIF1;LRRK2;AXL;NAGK;FGD2;NCKAP1L;HCK;SLC11A1;RAP2B;DAB2;CCDC88A;STK17B;SYK;ITGB2;CD86;PRKCB	CCDC88A;AXL;ARRB2;DAB2;NCKAP1L;HCK;HK3;AIF1;PYCARD;PKM;LRRK2;SYK;GADD45B;STK17B;SLC11A1;RAP2B;PRKCB;TLR2;HCLS1;SGK1;PILRB1;IL6RA;ITGB2;FGD2;MARCO;FGR;NAGK;CSF1R;MERTK	TLR2;STK17B;FGR;PTPN4;SGK1;PTPN22;AIF1;BCL2;CD44;CSF1R;TNFAIP3;STK10;PIP4K2A;GADD45B;CCND2;PRKCH;SYK;CCDC88A;ATM;HCLS1;NCF1;LYN;FYN;SEMA4D;PTPRC;SLC11A1;ITGB2;PRKCB	KIT;PTPN4;SYK;LCK;PTPN22;AIF1;CCDC88A;RASGRP1;PRKCB;STK17B;PRKCQ;PIP4K2A;CCND2;SEMA4D;FYN;PTPRC;PRKCH;BCL2;CSF1R;STK10;ATM;CD44	PTPN4;SLC11A1;PRKCQ;CCDC88A;SYK;PRKCH;CSF1R;LCK;STK10;AIF1;PIP4K2A;ITGB2;SGK1;PRKCB;HCLS1;HCK;FGR;GADD45B;HK3;KIT;SEMA4D;PTPN22;ATM;TNFAIP3;RASGRP1;STK17B;TLR2;PTPRC		TAL1;ACVRL1;ITGA6;ERG;TGFBR3;PDGFB;RASIP1;BMP4;RFK;RELN;RPS6KA2;KDR;EPHB4;LDB2;SNRK;APP;SMAD6;NPR1;CSNK1E;SPRY4;PECAM1;TIE1;DAB2;GRB10;PAPSS2;CAV1;IGFBP3;EDNRB;MAPK7;TLR4;CNKSR3;KCTD20;TEK	ERG;EHD4;RASIP1;HEG1;IGFBP3;SMAD6;ITGA6;ACVRL1;RELN;MAPK7;PDGFB;CSNK1E;WWTR1;FLT4;ITGA5;TCIM;ENG;RPS6KA2;TGFBR3;FLT1;SGK1;MAST4;KDR;KCTD20;DAB2;SNRK;TAL1;SH2D3C;EPHB4;PECAM1;TIE1;TLR4;PTPRB;CDH5;LIMCH1;NEDD9;CNKSR3;PEAK1
GOBP_TIGHT_JUNCTION_ORGANIZATION														1.33	2.708														4	6														ESAM;CLDN5;PECAM1;RAMP2	RAMP2;ESAM;PECAM1;CDH5;CLDN5;MYO1C
GOBP_POSITIVE_REGULATION_OF_TELOMERE_MAINTENANCE_VIA_TELOMERE_LENGTHENING											1.424	1.537														2	2														PRKCQ;ATM	PRKCQ;ATM
GOBP_POSITIVE_REGULATION_OF_PHOSPHATASE_ACTIVITY											1.407															2															PLEK;PTPRC
GOBP_P38MAPK_CASCADE										1.764		2.11													3		3													PTPN22;NCF1;GADD45B		PTPN22;RASGRP1;GADD45B
GOBP_NEGATIVE_REGULATION_OF_MAPK_CASCADE														2.749															9															MECOM;BMP4;DUSP5;SPRY4;DAB2;TLR4;CNKSR3;CAV1;SEMA6A
GOBP_POSITIVE_REGULATION_OF_REGULATED_SECRETORY_PATHWAY								1.585	1.749	1.84		2.179											3	3	3		3											PTAFR;ITGB2;SYK	ITGB2;SYK;FGR	ITGB2;FGR;SYK		SYK;ITGB2;FGR
GOBP_AXIS_SPECIFICATION													1.441															3															BMP4;DLL1;SMAD6
GOBP_CATION_TRANSMEMBRANE_TRANSPORT														1.318															18															EDNRB;SLC7A1;MEF2C;FXYD6;RELN;PIEZO2;CNKSR3;SLC7A8;FHL1;ANXA2;SELENON;SLC20A1;HECW2;TMEM37;CAV1;TCN2;GPM6A;APP
GOBP_REGULATION_OF_NEURAL_PRECURSOR_CELL_PROLIFERATION										1.383															3															BTG2;LYN;ADGRG1
GOBP_REGULATION_OF_ARP2_3_COMPLEX_MEDIATED_ACTIN_NUCLEATION								1.476															2															WASF2;WAS
GOBP_POSITIVE_REGULATION_OF_PROTEIN_MODIFICATION_PROCESS								1.769	2.648	3.363	3.273	2.882			1.386								16	17	18	16	14			18								NCKAP1L;FGD2;LAPTM5;RAP2B;DAB2;CCDC88A;CSF1R;JARID2;ARRB2;JDP2;SYK;AIF1;CD44;LRRK2;SLC11A1;CD86	JARID2;SLC11A1;AIF1;RAP2B;MARCO;LAPTM5;CCDC88A;HCLS1;CSF1R;ARRB2;DAB2;NCKAP1L;LRRK2;SYK;PILRB1;IL6RA;FGD2	PTPN22;CD44;SEMA4D;CSF1R;PTPRC;SLC11A1;SYK;CCDC88A;LAPTM5;ATM;HCLS1;NCF1;LYN;FYN;CCND2;AIF1;BCL2;JARID2	CSF1R;KIT;CCDC88A;RASGRP1;JARID2;SYK;CCND2;SEMA4D;FYN;PTPN22;PTPRC;ATM;AIF1;CD44;LAPTM5;BCL2	AIF1;PTPN22;SLC11A1;CCDC88A;ATM;SYK;RASGRP1;KIT;CSF1R;LAPTM5;PTPRC;JARID2;HCLS1;SEMA4D			FLT4;DAB2;ITGA5;TAL1;SH2D3C;PDGFB;TCIM;ENG;PECAM1;TLR4;EHD4;CDH5;FLT1;LIMCH1;ACVRL1;NEDD9;RELN;KDR
GOBP_CELL_JUNCTION_ORGANIZATION				1.747									2.651	4.858	5.061				8									12	25	24				THBS2;LAMC1;FLNA;GPC6;THBS1;THY1;SPARCL1;COL4A1									PALM;COL4A1;ITGA6;GPM6A;GJA1;PCDH17;LIMCH1;LAMB2;HDAC7;ACVRL1;APP;SPARCL1	ACVRL1;ITGA6;MEF2C;PCDH17;SPARCL1;EFNB2;DLC1;GPM6A;ESAM;RELN;GJA5;ACTN1;KDR;TUBA1A;APP;FSCN1;PECAM1;RAMP2;CAV1;CLDN5;LAMB2;TEK;FCGR3;HDAC7;PALM	PLXND1;HEG1;CLDN5;MYO1C;ACVRL1;ITGA6;RELN;MEF2C;GJA4;PCDH17;ITGA5;RAMP2;ESAM;LGMN;SHANK3;KDR;FSCN1;SEMA3F;PECAM1;ACTN1;CDH5;FCGR3;LIMCH1;PEAK1
GOBP_NEGATIVE_REGULATION_OF_LEUKOCYTE_MEDIATED_IMMUNITY							1.855	3.055	4.344													3	5	6													CD84;NCKAP1L;HMOX1	NCKAP1L;FCGR3;ARRB2;SPI1;CD84	FCGR3;CD55;ARRB2;NCKAP1L;CD84;SPI1
GOBP_POSITIVE_REGULATION_OF_ACTIN_NUCLEATION								1.619															2															WASF2;WAS
GOBP_REGULATION_OF_GLIAL_CELL_PROLIFERATION										1.446															2															PRKCH;LYN
GOBP_POSITIVE_REGULATION_OF_CD4_POSITIVE_ALPHA_BETA_T_CELL_ACTIVATION							2.31	2.913		2.172	2.342	1.537										3	4		3	3	2										CD83;ANXA1;NCKAP1L	ANXA1;CD83;NCKAP1L;CD86		ANXA1;SASH3;CD83	CD83;PRKCQ;SASH3	PRKCQ;SASH3
GOBP_POSITIVE_REGULATION_OF_RNA_METABOLIC_PROCESS														1.719	1.964														32	31														TAL1;ACVRL1;ITGA6;ERG;NCOA7;MEF2C;NAMPT;KLF7;PDGFB;IL33;DLL1;MAF;MECOM;BMP4;KLF4;ELK3;MEIS2;LDB2;LMO2;SMAD6;APP;CDH13;SKI;PLAC8;DAB2;ZEB2;KLF2;KDM6B;MAPK7;TLR4;ACTN1;ZFP462	NAMPT;ERG;KLF7;PLAC8;SMAD6;ITGA6;ACVRL1;MEF2C;MAPK7;CDH13;PDGFB;DLL1;SOX7;IL33;WWTR1;MAF;ETS2;ENG;TCF4;DAB2;TAL1;SOX17;ACTN1;ZEB2;KLF2;TLR4;KDM6B;CEBPD;NCOA7;TCERG1;KLF4
GOBP_MEMBRANE_TO_MEMBRANE_DOCKING															2.074															2															VCAM1;ICAM1
GOBP_INTERLEUKIN_4_PRODUCTION								3.13	1.328	3.418	4.906	3.905											4	2	4	5	4											FCER1G;CD83;CD86;SYK	SYK;FCER1G	SASH3;FCER1G;SYK;CD83	CD83;FCER1G;SYK;PRKCQ;SASH3	PRKCQ;SYK;FCER1G;SASH3
GOBP_SMOOTH_MUSCLE_CELL_PROLIFERATION				4.399	3.039	2.756	2.223							2.421	3.31				7	6	5	5							8	9				MMP2;IGFBP5;NOTCH3;THBS1;TPM1;ADAMTS1;PRKG1	IGFBP3;NOTCH3;MMP2;TPM1;IGFBP5;PRKG1	IGFBP5;NOTCH3;ADAMTS1;IGFBP3;TPM1	THBS1;PTAFR;GNAI2;HMOX1;CYBA							CDH13;CALCRL;NPR1;BMP4;MEF2C;TLR4;PDGFB;IGFBP3	MEF2C;GNAI2;CDH13;PDGFB;CALCRL;TLR4;NOS3;IGFBP3;ADAMTS1
GOBP_RESPONSE_TO_LEUKEMIA_INHIBITORY_FACTOR													1.39															3															ICAM1;KLF4;SOX17
GOBP_NEGATIVE_REGULATION_OF_CELL_DEATH	1.671						1.879	3.212	3.068	4.298	3.759	2.905		2.003	2.437	14						12	20	18	20	17	14		22	22	GHR;FGG;VNN1;AR;CAMK1D;AHI1;MPV17L;LRP6;CAT;FABP1;DNAJA1;ANGPTL4;SOD1;FGB						CTSH;LAPTM5;ANXA1;KLF4;GNAI2;SLC40A1;HCLS1;THBS1;AXL;NCKAP1L;PPT1;HMOX1	KLF4;CSF1R;UCP2;CD44;MERTK;LAPTM5;ARRB2;AIF1;LRRK2;AXL;CTSH;SRGAP2;PPT1;ANXA1;NCKAP1L;GNAI2;HCK;SLC40A1;LGMN;DAB2	SRGAP2;AIF1;PPT1;SLC40A1;HCLS1;CSF1R;AXL;ARRB2;DAB2;NCKAP1L;LRRK2;LGMN;MERTK;UCP2;LAPTM5;HCK;KLF4;GNAI2	IL2RB;NFKB1;LAPTM5;AIF1;BCL2;CD44;BTG2;CSF1R;TNFAIP3;ANXA1;FLNA;CCND2;CORO1A;PRKCH;HCLS1;CCR5;FYN;SEMA4D;TNFAIP8;KLF4	CSF1R;KIT;CORO1A;FLNA;CCND2;KLF4;IL2RB;FYN;SEMA4D;PRKCQ;CCR5;AIF1;PRKCH;CD44;TNFAIP8;LAPTM5;BCL2	AIF1;HCK;PRKCQ;TNFAIP3;KIT;CORO1A;PRKCH;CSF1R;IL2RB;KLF4;LAPTM5;CCR5;HCLS1;SEMA4D		ITGA6;NCOA7;MEF2C;ACKR3;DLL1;MECOM;BMP4;KLF4;PCGF2;KDR;SMAD6;PLAC8;DAB2;RAMP2;YBX3;CAV1;EDNRB;PEA15A;MAPK7;NES;TEK;CD34	PLAC8;SMAD6;ITGA6;MEF2C;MAPK7;DLL1;AQP1;FLT4;ITGA5;RAMP2;TCIM;LGMN;SERPINE1;NOS3;ICAM1;KDR;GNAI2;DAB2;PEA15A;NCOA7;CDH5;KLF4
GOBP_CORTICAL_CYTOSKELETON_ORGANIZATION								2.154															4															NCKAP1L;PLEK;EPB41L2;EPB41L3
GOBP_POSITIVE_REGULATION_OF_AMPA_RECEPTOR_ACTIVITY															1.761															2															RELN;SHANK3
GOBP_LYTIC_VACUOLE_ORGANIZATION									1.439															3															LAPTM5;LRRK2;PPT1
GOBP_MEMBRANE_INVAGINATION							1.592	2.53	4.648	2.876	2.321	4.466										3	5	7	5	4	6										RAB31;NCKAP1L;THBS1	NCKAP1L;FCGR3;RAB31;AIF1;ITGB2	RAB31;FCGR3;MARCO;AIF1;NCKAP1L;MSR1;ITGB2	ARHGAP25;RAC2;ITGB2;RAB31;AIF1	RAB31;ARHGAP25;FCGR3;AIF1	AIF1;ARHGAP25;RAC2;BIN2;ITGB2;RAB31
GOBP_MONOCYTE_CHEMOTACTIC_PROTEIN_1_PRODUCTION								1.509	1.632														2	2														CD84;SYK	SYK;CD84
GOBP_GAMMA_DELTA_T_CELL_DIFFERENTIATION								1.751	1.887	3.233	3.396	3.628											2	2	3	3	3											SYK;NCKAP1L	NCKAP1L;SYK	TCF7;SYK;PTPRC	SYK;TCF7;PTPRC	TCF7;SYK;PTPRC
GOBP_RESPIRATORY_SYSTEM_DEVELOPMENT				1.589	1.897	1.697													4	5	4													IGFBP5;CCBE1;COL3A1;ADAMTS2	TBX2;CCBE1;COL3A1;IGFBP5;ADAMTS2	TBX2;ADAMTS2;CCBE1;IGFBP5
GOBP_REGULATION_OF_MYELOID_LEUKOCYTE_DIFFERENTIATION					1.374		1.314													3		3													FBN1;SFRP1;FOS		TYROBP;HCLS1;C1QC
GOBP_RESPONSE_TO_PROSTAGLANDIN_E										1.573		1.83													2		2													PTGER2;GNG2		GNG2;PTGER2
GOBP_POSITIVE_REGULATION_OF_CELL_SUBSTRATE_ADHESION				2.978	3.384	1.561							2.438	3.593	3.191				5	6	3							5	9	8				FBLN2;FLNA;CCDC80;THY1;NID1	SFRP1;FLNA;CCDC80;THY1;NID1;FBLN2	CCDC80;THY1;NID1							NEDD9;FBLN2;COL8A1;NID1;PDGFB	CDH13;COL8A1;DAB2;FBLN2;TEK;NID1;KDR;PDGFB;ABI3BP	DAB2;ITGA5;CDH13;PDGFB;KDR;NEDD9;NID1;ABI3BP
GOBP_CELLULAR_RESPONSE_TO_AMYLOID_BETA								1.727	1.891				2.028	1.928	2.903								3	3				3	4	5								VCAM1;FCGR3;LGMN	VCAM1;FCGR3;LGMN				GJA1;APP;ICAM1	VCAM1;FCGR3;TLR4;APP	LGMN;TLR4;FCGR3;ICAM1;VCAM1
GOBP_CELLULAR_RESPONSE_TO_THYROID_HORMONE_STIMULUS							1.907	1.619														2	2														CTSH;CTSB	CTSB;CTSH
GOBP_NEGATIVE_REGULATION_OF_VASCULAR_ASSOCIATED_SMOOTH_MUSCLE_CELL_MIGRATION				2.214	2.057														2	2														PRKG1;TPM1	TPM1;PRKG1
GOBP_METANEPHRIC_NEPHRON_DEVELOPMENT													3.038	2.003														4	4														CD34;LAMB2;BMP4;PDGFB	PDGFB;BMP4;LAMB2;CD34
GOBP_CELL_ACTIVATION							9.653	13.368	13	12.804	12.826	14.104	2.425	1.456	2.602							27	38	35	34	31	31	14	20	23							CD93;FKBP1A;TYROBP;PLEK;ANXA1;TLR2;VCAM1;CD84;WDFY4;IRF8;PRKCB;CD83;C1QA;FGL2;PTAFR;IFNGR1;NCKAP1L;AXL;HMOX1;RAP2B;THBS1;PREX1;ICOSL;LAPTM5;LST1;NFAM1;VSIR	PTAFR;VSIR;FCGR3;FGL2;PYCARD;SPI1;C1QA;PLEK;CD44;VSIG4;IRF8;MERTK;MAP3K8;LAPTM5;IFI205;FCER1G;AIF1;THEMIS2;LRRK2;AXL;ANXA1;IFNGR1;NCKAP1L;WDFY4;CD83;ICOSL;VCAM1;CD84;SLC11A1;RAP2B;NFAM1;WAS;PREX1;SYK;TYROBP;ITGB2;CD86;PRKCB	WAS;VCAM1;CD55;AXL;ICOSL;NCKAP1L;IFNGR1;FCGR3;AIF1;PYCARD;LRRK2;SYK;SLC11A1;NFAM1;PRKCB;RAP2B;TLR2;FCER1G;IRF8;IL6RA;ITGB2;THEMIS2;WDFY4;FGR;TYROBP;C1QA;PREX1;FGL2;LST1;LAPTM5;MERTK;VSIG4;VSIR;CD84;SPI1	ITGAL;TLR2;IL2RB;LAPTM5;FGR;PTPN22;AIF1;BCL2;CD44;TCF7;TYROBP;TNFAIP3;RAC2;FGL2;ANXA1;CD83;PLEK;CD48;FLNA;LST1;CORO1A;SASH3;SYK;ATM;KLRK1;LYN;FYN;FCER1G;PTPRC;SLC11A1;SH3KBP1;ITGB2;IKZF1;PRKCB	KIT;CD83;SYK;FCER1G;LCK;IFI205;FCGR3;PTPN22;AIF1;TOX;RASGRP1;PRKCB;CORO1A;IL2RB;PRKCQ;LAPTM5;KLRK1;SASH3;CD48;IKZF1;SH3KBP1;FLNA;PLEK;FYN;PTPRC;TYROBP;BCL2;TCF7;ATM;CD44;FGL2	SLC11A1;PRKCQ;IKZF1;SYK;SH3KBP1;LAPTM5;LCK;TCF7;AIF1;RAC2;FGL2;CORO1A;ITGB2;KLRK1;PRKCB;LST1;FCER1G;FGR;KIT;SASH3;TOX;PTPN22;ATM;ITGAL;TNFAIP3;RASGRP1;IL2RB;TYROBP;TLR2;PTPRC;CD48	CD320;BMP4;APP;SLC7A1;GJA1;DLL1;PDGFB;CSRP1;VWF;ICAM1;ANXA1;FKBP1A;COL3A1;IL33	MEF2C;EFNB2;VCAM1;PDGFB;IL33;DLL1;ADGRF5;AKAP12;BMP4;COL3A1;ACTN1;SLC7A1;APP;SELP;MMRN1;VWF;CAV1;TLR4;FCGR3;DNASE1L3	VWF;CLEC4G;DNASE1L3;C1QTNF1;MEF2C;PDGFB;CSRP1;SELP;DLL1;IL33;CD320;TCIM;NOS3;ICAM1;VCAM1;ADGRF5;CD55;AKAP12;ACTN1;TLR4;FCGR3;NDRG1;COL3A1
GOBP_REGULATION_OF_BMP_SIGNALING_PATHWAY					1.448								1.352	1.522	1.636					3								3	5	5					FSTL1;FBN1;SFRP1								ACVRL1;BMP4;SMAD6	ACVRL1;BMP4;SKI;KDR;SMAD6	ENG;CDH5;SMAD6;ACVRL1;KDR
GOBP_REGULATION_OF_TELOMERASE_ACTIVITY											2.005	2.179														3	3														PRKCQ;KLF4;ATM	KLF4;PRKCQ;ATM
GOBP_NEUTROPHIL_MIGRATION							1.405	4.693	4.127	1.854	2.067	4.012										3	8	7	4	4	6										MPP1;PREX1;NCKAP1L	NCKAP1L;PREX1;FCER1G;S100A9;SYK;ITGB2;MPP1;S100A8	S100A8;S100A9;FCER1G;NCKAP1L;SYK;PREX1;ITGB2	ITGB2;RAC2;FCER1G;SYK	SYK;S100A8;FCER1G;S100A9	RAC2;S100A9;SYK;ITGB2;S100A8;FCER1G
GOBP_VAGINA_DEVELOPMENT								1.942	2.072														2	2														AXL;MERTK	AXL;MERTK
GOBP_COBALAMIN_TRANSPORT															1.959															2															TCN2;CD320
GOBP_REGULATION_OF_NON_CANONICAL_WNT_SIGNALING_PATHWAY														1.711															3															DAB2;TIAM1;CSNK1E
GOBP_NEGATIVE_REGULATION_OF_CHEMOTAXIS										1.664	1.838	1.998													3	3	3													SEMA4D;AIF1;KLRK1	AIF1;SEMA4D;KLRK1	AIF1;KLRK1;SEMA4D
GOBP_REGULATION_OF_NMDA_RECEPTOR_ACTIVITY														1.863															3															MEF2C;RELN;APP
GOBP_NEGATIVE_REGULATION_OF_TUMOR_NECROSIS_FACTOR_SUPERFAMILY_CYTOKINE_PRODUCTION								1.382	1.535														3	3														AXL;VSIR;ARRB2	AXL;ARRB2;VSIR
GOBP_NEGATIVE_REGULATION_OF_HEMOPOIESIS							1.426	1.585														3	4														FGL2;ANXA1;C1QC	ANXA1;C1QC;FCGR3;FGL2
GOBP_REGULATION_OF_CELLULAR_PH									1.314															3															SLC11A1;LRRK2;PPT1
GOBP_PHAGOSOME_MATURATION										1.519	1.639	1.77													2	2	2													CORO1A;RAB31	RAB31;CORO1A	RAB31;CORO1A
GOBP_HYDROGEN_PEROXIDE_METABOLIC_PROCESS	2.494									1.884		1.346				4									3		2				MPV17L;HP;SOD1;CAT									CYBB;RAC2;FYN		CYBB;RAC2
GOBP_COLLAGEN_ACTIVATED_TYROSINE_KINASE_RECEPTOR_SIGNALING_PATHWAY				3.771									1.987						3									2						COL4A2;COL1A1;COL4A1									COL4A2;COL4A1
GOBP_INTERLEUKIN_12_PRODUCTION							2.693	2.223	3.365	2.512	1.886	2.98										4	4	5	4	3	4										TLR2;IRF8;LAPTM5;THBS1	IRF8;SYK;LAPTM5;ARRB2	TLR2;ARRB2;IRF8;SYK;LAPTM5	LAPTM5;NFKB1;TLR2;SYK	SYK;LTB;LAPTM5	TLR2;SYK;LAPTM5;LTB
GOBP_REGULATION_OF_NAD_P_H_OXIDASE_ACTIVITY							2.144	1.872	2.008													2	2	2													GNAI2;CYBA	CYBA;GNAI2	CYBA;GNAI2
GOBP_LEUKOCYTE_MIGRATION_INVOLVED_IN_INFLAMMATORY_RESPONSE								1.509	1.632		1.822	1.961											2	2		2	2											S100A9;S100A8	S100A8;S100A9		S100A9;S100A8	S100A9;S100A8
GOBP_HOMOTYPIC_CELL_CELL_ADHESION				1.731	2.296	1.839				2.018	2.243								3	4	3				4	4								FLNA;PRKG1;CSRP1	FLNA;PRKG1;ACTN1;MYL9	ACTN1;C1QTNF1;CSRP1				PLEK;FLNA;LYN;SYK	FLNA;SYK;PRKCQ;PLEK
GOBP_PARACRINE_SIGNALING													2.321	1.77														2	2														CD34;PDGFB	PDGFB;CD34
GOBP_PROTEIN_NITROSYLATION								1.711	1.832		2.018	2.167											2	2		2	2											S100A9;S100A8	S100A8;S100A9		S100A9;S100A8	S100A9;S100A8
GOBP_INTEGRIN_ACTIVATION							1.617	1.309														2	2														PLEK;FBLIM1	FBLIM1;PLEK
GOBP_OUTFLOW_TRACT_MORPHOGENESIS													1.551	2.484	3.485													3	6	7													SOX17;BMP4;SMAD6	BMP4;CLDN5;MEF2C;TGFBR3;GJA5;SMAD6	MEF2C;SOX17;ENG;TGFBR3;PLXND1;CLDN5;SMAD6
GOBP_BONE_MORPHOGENESIS													1.39	2.098														3	6														COL3A1;SERPINH1;BMP4	BMP4;MEF2C;SERPINH1;CHSY1;SKI;COL3A1
GOBP_MEGAKARYOCYTE_DEVELOPMENT											1.888	2.032														2	2														KIT;PIP4K2A	PIP4K2A;KIT
GOBP_POSITIVE_REGULATION_OF_ENDOTHELIAL_CELL_CHEMOTAXIS															1.427															2															LGMN;KDR
GOBP_ORGANONITROGEN_COMPOUND_BIOSYNTHETIC_PROCESS										1.455															18															RPS19;RPL13;RPL10A;BTG2;RPLP2;NFKB1;RPL27;RPS12;RPS18;RPS14;TET2;RPL27A;RPS15A;VIM;RPL18;KLF4;PABPC4;BCL2
GOBP_REGULATION_OF_DEFENSE_RESPONSE_TO_VIRUS										1.592		1.929													3		3													FGL2;PTPN22;TNFAIP3		TNFAIP3;PTPN22;FGL2
GOBP_NEGATIVE_REGULATION_OF_LEUKOCYTE_DEGRANULATION							3.29	4.448	4.668													3	4	4													CD84;NCKAP1L;HMOX1	CD84;SPI1;FCGR3;NCKAP1L	FCGR3;NCKAP1L;CD84;SPI1
GOBP_POSITIVE_REGULATION_OF_T_CELL_MIGRATION									1.375															2															PYCARD;AIF1
GOBP_REGULATION_OF_CELL_MORPHOGENESIS				1.663	1.44		3.442	4.825	2.768	6.438	3.409	4.545	1.69	1.467					5	5		9	13	9	14	9	10	6	9					FBLN1;FLNA;SPARC;CDC42EP3;TPM1	FBLN1;SPARC;FLNA;TPM1;CDC42EP3		LST1;PLEKHO1;ANXA1;FBLIM1;FGD2;CXCR4;PREX1;CDC42EP3;LIMS1	ANXA1;FGD2;PLEKHO1;DAB2;CSF1R;LIMS1;PREX1;FBLIM1;HCK;CD44;EPB41L3;ITGB2;CDC42EP3	FGR;EPB41L3;CSF1R;DAB2;PREX1;LST1;HCK;ITGB2;FGD2	CD44;CSF1R;CORO1A;RAC2;LST1;CDC42SE2;SH3KBP1;ITGB2;FGR;ANXA1;CXCR4;FLNA;FYN;SEMA4D	CSF1R;KIT;CORO1A;SH3KBP1;FLNA;SEMA4D;FYN;CDC42SE2;CD44	HCK;RAC2;FGR;KIT;CSF1R;CORO1A;SH3KBP1;ITGB2;LST1;SEMA4D	PALM;RHOJ;CDC42EP3;SPARC;ANXA1;NEDD9	KDR;SPRY4;CDC42EP3;RELN;DAB2;DLC1;FGD5;SPARC;PALM
GOBP_ANTIGEN_PROCESSING_AND_PRESENTATION							2.31	6.327	5.681	1.422	1.583	1.742										4	9	8	3	3	3										FGL2;CTSH;WDFY4;THBS1	LGMN;WDFY4;FCGR3;FGL2;WAS;PYCARD;FCER1G;CTSH;SLC11A1	FCGR3;WAS;SLC11A1;LGMN;FCER1G;PYCARD;FGL2;WDFY4	FGL2;FCER1G;SLC11A1	FCER1G;FCGR3;FGL2	SLC11A1;FCER1G;FGL2
GOBP_ENDOCARDIAL_CUSHION_MORPHOGENESIS						1.536									1.44						2									3						TBX2;ENG									ACVRL1;ENG;NOS3
GOBP_URETER_DEVELOPMENT													1.731															2															BMP4;SOX17
GOBP_POSITIVE_REGULATION_OF_VASCULOGENESIS														2.429	1.523														3	2														KDR;CD34;RAMP2	RAMP2;KDR
GOBP_RESPONSE_TO_IONIZING_RADIATION										1.444															4															ATM;BCL2;ANXA1;PTPRC
GOBP_RESPONSE_TO_ETHANOL	1.47							1.332	1.512							4							4	4							HMGCS2;HAMP;SOD1;CAT							VCAM1;TBXAS1;S100A8;CYBB	TBXAS1;VCAM1;CYBB;S100A8
GOBP_RESPONSE_TO_OXYGEN_LEVELS					1.388		2.177													5		7													COL1A1;SFRP1;MMP2;CRYAB;SOD3		THBS1;CYBB;TLR2;VCAM1;HMOX1;CYBA;CXCR4
GOBP_METAL_ION_HOMEOSTASIS							1.373		1.737	2.322	2.008	3.311										8		11	12	10	12										PRKCB;GNAI2;SLC40A1;FKBP1A;CYBA;SLC31A2;CXCR4;HMOX1		SLC11A1;FPR1;S100A8;CD55;SLC31A2;S100A9;PRKCB;CD52;SLC40A1;CYBA;GNAI2	CD52;PTPRC;SLC11A1;TMC8;CORO1A;LYN;CXCR4;PTGER2;PRKCB;CCR5;FYN;BCL2	PRKCB;CORO1A;LCK;CD52;FYN;PTPRC;S100A8;CCR5;S100A9;BCL2	FPR1;SLC11A1;CD52;S100A9;CORO1A;TMC8;PTPRC;LCK;S100A8;PRKCB;PTGER2;CCR5
GOBP_BLOOD_VESSEL_MORPHOGENESIS				5.264	2.694	5.16	2.871	1.342		3.135	1.585	1.47	11.114	17.612	23.82				14	11	13	12	11		14	9	8	24	43	48				COL4A2;THBS2;MMP2;CCBE1;SPARC;FLNA;KLF4;NOTCH3;THBS1;THY1;SEMA5A;ADAMTS1;COL3A1;COL4A1	SFRP1;KLF4;TBX2;SPARC;FLNA;SEMA5A;NOTCH3;CCBE1;MMP2;THY1;COL3A1	MCAM;SPARC;THY1;ENG;THBS2;NOTCH3;SERPINE1;ADAMTS1;AGTR1A;TBX2;ADGRF5;CCBE1;KLF4	PRKCB;CTSH;CYBB;PKM;ANXA1;VSTM4;TNFAIP2;THBS1;TGFBI;KLF4;HMOX1;CXCR4	ANXA1;PKM;VSTM4;KLF4;CYBB;SPI1;SYK;TGFBI;CTSH;WASF2;PRKCB		ETS1;CYBB;TNFAIP3;TGFBI;BTG1;SYK;KLF2;CXCR4;ADGRG1;TNFAIP2;ANXA1;PRKCB;FLNA;KLF4	ETS1;CYBB;ADGRG1;PRKCB;FLNA;SYK;KLF2;TGFBI;KLF4	TGFBI;ADGRG1;TNFAIP3;SYK;KLF4;CYBB;PRKCB;KLF2	COL4A2;ADGRG1;RHOJ;GJA1;KLF4;ADAMTS9;SPARC;ACVRL1;COL3A1;CD34;ANXA2;ANGPT2;VASH1;HDAC7;COL8A1;APOLD1;TIE1;SOX17;PTGIS;COL4A1;BMP4;ADAM15;DLL1;ANXA1	TAL1;ACVRL1;ADAM15;MMRN2;TGFBR3;ACKR3;COL8A1;EFNB2;ANXA2;RASIP1;DLL1;ADGRF5;BMP4;EGFL7;KLF4;GJA5;ELK3;CLEC14A;KDR;EPHB4;ADAMTS9;STAB2;CDH13;NPR1;CALCRL;STAB1;PRCP;ADGRG1;RAMP2;TIE1;PTPRM;SPARC;CAV1;APOLD1;SEMA6A;KLF2;CLDN5;PTGIS;MAPK7;TEK;COL3A1;HDAC7;CD34	CALCRL;ECM1;PLXND1;APOLD1;PTGIS;RASIP1;HEG1;CLDN5;ADAM15;ACVRL1;ANXA2;CLEC14A;ADGRG1;CEMIP2;STAB1;MAPK7;SPARC;COL3A1;CDH13;SEMA6A;ROBO4;DLL1;PTPRM;PRCP;AQP1;FLT4;ITGA5;RAMP2;EGFL7;ENG;TGFBR3;SERPINE1;NOS3;FLT1;MCAM;ADGRF5;ADAMTS1;KDR;TAL1;EPHB4;SOX17;KLF2;TIE1;PTPRB;CDH5;STAB2;MMRN2;KLF4
GOBP_EPIBOLY				1.564	1.448					1.316	1.424								2	2					2	2								FLNA;COL5A1	FLNA;COL5A1					CD44;FLNA	FLNA;CD44
GOBP_EPITHELIAL_CELL_DIFFERENTIATION_INVOLVED_IN_KIDNEY_DEVELOPMENT				1.386									2.857	3.412	1.331				2									4	6	3				ACTA2;EDNRB									CD34;LAMB2;BMP4;PDGFB	EDNRB;BMP4;MEF2C;LAMB2;PDGFB;CD34	WWTR1;MEF2C;PDGFB
GOBP_POSITIVE_REGULATION_OF_GLIAL_CELL_PROLIFERATION										1.813															2															PRKCH;LYN
GOBP_POSITIVE_REGULATION_OF_ENDOTHELIAL_CELL_PROLIFERATION													1.38	3.412	3.725													3	8	8													BMP4;PDGFB;ACVRL1	CDH13;ACVRL1;BMP4;EGFL7;CAV2;TEK;KDR;PDGFB	FLT4;CDH13;PDGFB;ECM1;EGFL7;CAV2;ACVRL1;KDR
GOBP_POSITIVE_REGULATION_OF_TUMOR_NECROSIS_FACTOR_SUPERFAMILY_CYTOKINE_PRODUCTION							5.426	6.608	6.053	3.369	3.699	5.018										8	10	9	6	6	7										CYBB;PTAFR;TLR2;IFNGR1;CD84;THBS1;CYBA;TYROBP	PTAFR;IFNGR1;CYBA;CYBB;LRRK2;PYCARD;SYK;TYROBP;CD84;CD86	CYBB;TLR2;TYROBP;PYCARD;IFNGR1;LRRK2;SYK;CYBA;CD84	TLR2;PTPRC;CYBB;TYROBP;SASH3;SYK	RASGRP1;CYBB;SYK;PTPRC;SASH3;TYROBP	SYK;RASGRP1;SASH3;TYROBP;CYBB;TLR2;PTPRC
GOBP_REGULATION_OF_CELLULAR_COMPONENT_MOVEMENT				5.76	5.095	4.483	3.04	2.773	2.668	5.266	3.361	3.928	9.08	9.462	17.996				18	19	15	16	20	18	23	17	17	26	41	51				FBLN1;COL1A1;MMP2;CCBE1;SPARC;FLNA;ACTA2;KLF4;IGFBP5;LAMB1;THBS1;THY1;SEMA5A;TPM1;CAVIN1;ADAMTS1;COL3A1;PRKG1	SFRP1;FLNA;PRKG1;CAVIN1;MMP2;THY1;COL3A1;IGFBP5;ACTN1;COL1A1;SPARC;TPM1;ACTA2;LAMB1;FBLN1;KLF4;SEMA5A;IGFBP3;CCBE1	IGFBP5;MCAM;SPARC;THY1;ENG;ACTN1;SERPINE1;ADAMTS1;IGFBP3;LAMB1;CCBE1;KLF4;COL1A1;TPM1;FBLN1	MPP1;CTSH;TMSB10;PTAFR;SGK1;ANXA1;GNAI2;GLIPR2;S100A11;RAP2B;THBS1;NCKAP1L;CXCR4;KLF4;HMOX1;VSIR	PTAFR;S100A11;VSIR;KLF4;CSF1R;PYCARD;SPI1;AIF1;CTSH;SRGAP2;ANXA1;NCKAP1L;GLIPR2;GNAI2;RAP2B;LGMN;DAB2;TMSB10;WAS;MPP1	WAS;SRGAP2;AIF1;RAP2B;FGR;LGMN;CSF1R;SPI1;PYCARD;DAB2;NCKAP1L;S100A11;TMSB10;SGK1;IL6RA;VSIR;KLF4;GNAI2	ETS1;FGR;SGK1;CXCR4;AIF1;BCL2;EVL;CSF1R;RAC2;STK10;ANXA1;FLNA;ARHGDIB;CORO1A;ATM;KLRK1;LYN;SEMA4D;RPS19;PTPRC;ADGRG1;S100A11;KLF4	EVL;KIT;CSF1R;ETS1;ADGRG1;CORO1A;FLNA;KLF4;SEMA4D;ARHGDIB;S100A11;PTPRC;STK10;ATM;AIF1;KLRK1;BCL2	AIF1;FGR;RAC2;ATM;ARHGDIB;KIT;CSF1R;CORO1A;KLF4;SGK1;EVL;PTPRC;KLRK1;STK10;ADGRG1;S100A11;SEMA4D	ADGRG1;RHOJ;CAVIN1;GJA1;KLF4;TIAM1;ADAMTS9;SPARC;ICAM1;ACVRL1;COL3A1;APP;ITGA6;LIMCH1;ANGPT2;VASH1;TMSB10;HDAC7;NEDD9;TIE1;SGK1;BMP4;ADAM15;DPYSL3;ANXA1;PDGFB	ACVRL1;ITGA6;ADAM15;MMRN2;MEF2C;TGFBR3;ACKR3;TIAM1;DLC1;PDGFB;AKAP12;DPYSL3;BMP4;RIPOR1;RELN;KLF4;GJA5;ACTN1;LDB2;KDR;ADAMTS9;APP;CDH13;SELP;PRCP;ADGRG1;PECAM1;TIE1;PTPRM;DAB2;TMSB10;SPARC;CAVIN1;CAV1;IGFBP3;SEMA6A;CLDN5;TLR4;TEK;COL3A1;HDAC7	TMSB10;PLVAP;ECM1;PLXND1;IGFBP3;CLDN5;ADGRG1;ADAM15;ACVRL1;ITGA6;MYO1C;RELN;RIPOR1;MEF2C;SPARC;COL3A1;CDH13;SEMA6A;PDGFB;SELP;ROBO4;PTPRM;PRCP;FLT4;ITGA5;DPYSL3;LGMN;ENG;TGFBR3;SERPINE1;NOS3;FLT1;MCAM;SGK1;ICAM1;MMRN2;ADAMTS1;KDR;AKAP12;DAB2;GNAI2;SEMA3F;PECAM1;ACTN1;TIE1;TLR4;CDH5;LIMCH1;NEDD9;JAM2;KLF4
GOBP_FOREBRAIN_CELL_MIGRATION								1.425	1.576														3	3														LRRK2;AXL;SRGAP2	AXL;SRGAP2;LRRK2
GOBP_REACTIVE_NITROGEN_SPECIES_METABOLIC_PROCESS									1.386	3.009	2.405	3.586	1.576	2.538	2.055									3	5	4	5	3	6	5									TLR2;KLF4;AIF1	TLR2;KLF2;KLRK1;KLF4;AIF1	AIF1;KLF2;KLF4;KLRK1	AIF1;KLF4;TLR2;KLRK1;KLF2	PTGIS;CD34;KLF4	KLF2;PTGIS;KLF4;TLR4;CAV1;CD34	KLF2;TLR4;PTGIS;NOS3;KLF4
GOBP_POSITIVE_REGULATION_OF_FILOPODIUM_ASSEMBLY													2.425	2.446														3	4														PALM;DPYSL3;GPM6A	DPYSL3;GPM6A;FSCN1;PALM
GOBP_BASEMENT_MEMBRANE_ASSEMBLY				2.102	1.962	2.107							1.894	2.277	1.427				2	2	2							2	3	2				PXDN;LAMB1	PXDN;LAMB1	LAMB1;PXDN							LAMB2;PXDN	LAMB2;PXDN;RAMP2	PXDN;RAMP2
GOBP_BASEMENT_MEMBRANE_ORGANIZATION				3.989	2.443	2.717							3.414	4.322	2.487				4	3	3							4	6	4				PXDN;COL4A1;LAMB1;NID1	NID1;PXDN;LAMB1	LAMB1;PXDN;NID1							COL4A1;LAMB2;PXDN;NID1	LAMB2;RAMP2;CAV2;PXDN;NID1;CAV1	PXDN;CAV2;RAMP2;NID1
GOBP_ALKANESULFONATE_METABOLIC_PROCESS	2.123		3.785													2		3													GHR;BAAT		BAAT;GHR;CSAD
GOBP_POSITIVE_REGULATION_OF_NITRIC_OXIDE_METABOLIC_PROCESS										2.958	3.194	3.444		1.331	1.427										4	4	4		3	3										KLF2;KLF4;AIF1;KLRK1	AIF1;KLF2;KLF4;KLRK1	AIF1;KLF4;KLRK1;KLF2		TLR4;KLF2;KLF4	TLR4;KLF2;KLF4
GOBP_G_PROTEIN_COUPLED_ACETYLCHOLINE_RECEPTOR_SIGNALING_PATHWAY							1.844	1.547	1.671													2	2	2													GNAI2;RGS10	RGS10;GNAI2	RGS10;GNAI2
GOBP_REGULATION_OF_RESPIRATORY_BURST										2.92															3															RPS19;NCF1;RAC2
GOBP_RENAL_SYSTEM_PROCESS_INVOLVED_IN_REGULATION_OF_BLOOD_VOLUME														1.411															2															PDGFB;GJA5
GOBP_REGULATION_OF_MAP_KINASE_ACTIVITY											1.921	2.141														5	5														KIT;RASGRP1;SYK;PTPRC;PTPN22	PTPN22;SYK;RASGRP1;KIT;PTPRC
GOBP_NEGATIVE_REGULATION_OF_ADAPTIVE_IMMUNE_RESPONSE									1.664															3															FCGR3;NCKAP1L;CD55
GOBP_VASCULAR_ENDOTHELIAL_GROWTH_FACTOR_SIGNALING_PATHWAY				1.416	1.322	1.479									3.809				2	2	2									6				CCBE1;CD63	CD63;CCBE1	CD63;CCBE1									FLT4;SEMA6A;FLT1;DLL1;MYO1C;KDR
GOBP_FC_EPSILON_RECEPTOR_SIGNALING_PATHWAY								1.355	1.478	2.546	2.724	2.934											2	2	3	3	3											FCER1G;SYK	SYK;FCER1G	LYN;FCER1G;SYK	FCER1G;SYK;PRKCQ	SYK;FCER1G;PRKCQ
GOBP_REGULATION_OF_INTRINSIC_APOPTOTIC_SIGNALING_PATHWAY_IN_RESPONSE_TO_DNA_DAMAGE										1.316	1.424														2	2														CD44;BCL2	CD44;BCL2
GOBP_MUSCLE_ORGAN_MORPHOGENESIS													1.518		1.391													3		4													COL3A1;FKBP1A;BMP4		ENG;COL3A1;TGFBR3;HEG1
GOBP_SEX_DETERMINATION	1.463															2															SRD5A1;AR
GOBP_POSITIVE_REGULATION_OF_PATHWAY_RESTRICTED_SMAD_PROTEIN_PHOSPHORYLATION															1.338															3															ACVRL1;ENG;DAB2
GOBP_DEMETHYLATION								1.382			1.794												3			3												KDM6B;TET2;JARID2			JARID2;TOX;TET2
GOBP_STEM_CELL_DIFFERENTIATION					1.338							1.347								4							4								EDNRB;SEMA5A;TBX2;SFRP1							JARID2;KIT;PTPRC;SEMA4D
GOBP_KILLING_OF_CELLS_OF_ANOTHER_ORGANISM										1.519															2															RPS19;SYK
GOBP_RESPONSE_TO_REACTIVE_OXYGEN_SPECIES				1.648	3.311					2.769	1.341								4	7					7	4								TPM1;COL1A1;MMP2;FBLN5	COL1A1;FOS;FBLN5;MMP2;CRYAB;TPM1;SOD3					SESN1;TNFAIP3;KLF2;NCF1;ANXA1;FYN;BCL2	SESN1;KLF2;BCL2;FYN
GOBP_LEUKOTRIENE_METABOLIC_PROCESS									1.427	2.466		2.854												2	3		3												TLR2;SYK	ALOX5AP;TLR2;SYK		TLR2;SYK;ALOX5AP
GOBP_CELLULAR_RESPONSE_TO_CADMIUM_ION							1.617			1.493												2			2												CYBB;HMOX1			CYBB;NCF1
GOBP_SMOOTH_MUSCLE_CELL_DIFFERENTIATION					1.744	2.006								2.021	1.572					3	3								5	4					EDNRB;TBX2;ITGA8	TBX2;ITGA8;ENG								EDNRB;BMP4;MEF2C;RAMP2;PDGFB	MEF2C;ENG;RAMP2;PDGFB
GOBP_REGULATION_OF_CELL_CYCLE_G1_S_PHASE_TRANSITION					1.569	1.88				2.373	2.043									4	4				6	5									FHL1;CTDSPL;TBX2;KLF4	TBX2;ADAMTS1;KLF4;CTDSPL				KLF4;ATM;ANXA1;CCND2;AIF1;BCL2	CCND2;KLF4;ATM;AIF1;BCL2
GOBP_VASCULAR_ASSOCIATED_SMOOTH_MUSCLE_CELL_MIGRATION				4.165	2.545	2.844							1.515	1.684	1.768				4	3	3							2	3	3				IGFBP5;ADAMTS1;PRKG1;TPM1	PRKG1;IGFBP5;TPM1	IGFBP5;TPM1;ADAMTS1							GRB10;PDGFB	MEF2C;PDGFB;GRB10	MEF2C;PDGFB;ADAMTS1
GOBP_NEGATIVE_REGULATION_OF_INTERFERON_BETA_PRODUCTION									2.008															2															PYCARD;REL
GOBP_REGULATION_OF_LYMPHOCYTE_MEDIATED_IMMUNITY								1.585	1.795		2.184	1.752											5	5		5	4											NCKAP1L;STX7;FCGR3;WAS;ARRB2	FCGR3;WAS;CD55;ARRB2;NCKAP1L		RASGRP1;FCGR3;PTPRC;KLRK1;SASH3	KLRK1;PTPRC;RASGRP1;SASH3
GOBP_VASCULAR_ENDOTHELIAL_GROWTH_FACTOR_RECEPTOR_2_SIGNALING_PATHWAY														1.984	2.074														2	2														KDR;CLEC14A	CLEC14A;KDR
GOBP_RESPONSE_TO_MINERALOCORTICOID							2.484		2.291	2.366		1.672										3		3	3		2										CYBA;CYBB;SGK1		CYBB;SGK1;CYBA	RPL27;CYBB;SGK1		SGK1;CYBB
GOBP_GLIAL_CELL_DIFFERENTIATION							1.718		1.791			1.331	1.625	2.062								5		6			4	5	9								C1QA;TLR2;IFNGR1;VIM;CXCR4		S100A8;VIM;S100A9;TLR2;IFNGR1;C1QA			S100A9;TLR2;VIM;S100A8	ADGRG6;VIM;DLL1;LAMB2;APP	TAL1;SKI;LAMB2;ADGRG6;RELN;TLR4;VIM;DLL1;APP
GOBP_MONOCYTE_CHEMOTAXIS								2.46	2.673	2.745					1.947								4	4	4					4								ANXA1;FOLR2;AIF1;LGMN	IL6RA;LGMN;FOLR2;AIF1	RPS19;AIF1;LYN;ANXA1					LGMN;SERPINE1;FLT1;PDGFB
GOBP_REGULATION_OF_LYSOSOMAL_LUMEN_PH								1.661	1.791														2	2														LRRK2;PPT1	LRRK2;PPT1
GOBP_POSITIVE_REGULATION_OF_STEROID_HORMONE_SECRETION															1.684															2															DAB2;C1QTNF1
GOBP_VESICLE_MEDIATED_TRANSPORT_BETWEEN_ENDOSOMAL_COMPARTMENTS											1.314															2															FLNA;CORO1A
GOBP_REGULATION_OF_AMYLOID_PRECURSOR_PROTEIN_CATABOLIC_PROCESS							2.077															3															IFNGR1;RTN1;FKBP1A
GOBP_CD8_POSITIVE_ALPHA_BETA_T_CELL_ACTIVATION							2.619	2.271	2.448	1.519	2.682	1.77										3	3	3	2	3	2										NCKAP1L;WDFY4;VSIR	VSIR;NCKAP1L;WDFY4	NCKAP1L;VSIR;WDFY4	PTPN22;BCL2	PTPN22;TOX;BCL2	PTPN22;TOX
GOBP_REGULATION_OF_LIPOPOLYSACCHARIDE_MEDIATED_SIGNALING_PATHWAY									1.535															2															LY86;CD55
GOBP_POSITIVE_REGULATION_OF_LYMPHOCYTE_MEDIATED_IMMUNITY											2.055	2.256														4	4														RASGRP1;PTPRC;KLRK1;SASH3	KLRK1;PTPRC;RASGRP1;SASH3
GOBP_PULMONARY_VALVE_DEVELOPMENT													1.636	1.887														2	3														BMP4;SMAD6	BMP4;GJA5;SMAD6
GOBP_ADENYLATE_CYCLASE_MODULATING_G_PROTEIN_COUPLED_RECEPTOR_SIGNALING_PATHWAY										1.352				1.554	1.359										5				8	7										GNG2;ADGRE5;ADGRG1;PTGER2;FLNA				AKAP12;CALCRL;ADGRL4;ADGRG6;ADGRG1;ADCY4;RAMP2;PALM	ADCY4;AKAP12;GNAI2;RAMP2;CALCRL;ADGRG1;ADGRL4
GOBP_NEGATIVE_REGULATION_OF_VASCULAR_ASSOCIATED_SMOOTH_MUSCLE_CELL_PROLIFERATION				1.7	1.588														2	2														PRKG1;TPM1	PRKG1;TPM1
GOBP_ERYTHROCYTE_MATURATION														1.318	1.391														2	2														TAL1;KLF2	TAL1;KLF2
GOBP_SKELETAL_MUSCLE_ORGAN_DEVELOPMENT														1.733															7															MEF2C;SKI;CAV2;YBX3;SELENON;CAV1;DLL1
GOBP_DEFENSE_RESPONSE_TO_FUNGUS								2.872	3.068		2.323	2.512											4	4		3	3											SPI1;S100A9;S100A8;COTL1	COTL1;S100A8;S100A9;SPI1		S100A9;S100A8;COTL1	S100A9;COTL1;S100A8
GOBP_REGULATION_OF_NITRIC_OXIDE_METABOLIC_PROCESS										2.494	2.724	2.958	1.767	2.989	1.715										4	4	4	3	6	4										KLF2;KLF4;AIF1;KLRK1	AIF1;KLF2;KLF4;KLRK1	AIF1;KLF4;KLRK1;KLF2	PTGIS;CD34;KLF4	KLF2;PTGIS;KLF4;TLR4;CAV1;CD34	PTGIS;KLF2;KLF4;TLR4
GOBP_NEGATIVE_REGULATION_OF_T_CELL_MEDIATED_CYTOTOXICITY								2.018	2.144		2.323												2	2		2												FCGR3;NCKAP1L	FCGR3;NCKAP1L		PTPRC;FCGR3
GOBP_RENAL_TUBULE_DEVELOPMENT													1.405															3															BMP4;COL4A1;DLL1
GOBP_REGULATION_OF_CELL_CELL_ADHESION							3.64	7.846	5.257	8.414	10.851	7.95										11	20	15	19	20	16										ICOSL;CD83;IL1RN;FGL2;LAPTM5;PTAFR;ANXA1;VCAM1;NCKAP1L;KLF4;VSIR	PTAFR;VSIR;KLF4;FCGR3;FGL2;PYCARD;SPI1;CD44;VSIG4;MAP3K8;LAPTM5;AIF1;ANXA1;NCKAP1L;CD83;ICOSL;VCAM1;SYK;ITGB2;CD86	FCGR3;VCAM1;CD55;AIF1;ICOSL;PYCARD;NCKAP1L;SYK;FGL2;VSIG4;LAPTM5;ITGB2;VSIR;KLF4;SPI1	ETS1;LAPTM5;PTPN22;AIF1;MBP;CD44;FGL2;ANXA1;CD83;CORO1A;SASH3;SYK;KLRK1;LYN;FYN;AKNA;PTPRC;ITGB2;KLF4	ETS1;CD83;SYK;LCK;FCGR3;PTPN22;AIF1;RASGRP1;AKNA;CORO1A;PRKCQ;LAPTM5;KLRK1;SASH3;KLF4;FYN;MBP;PTPRC;CD44;FGL2	AIF1;PTPN22;PRKCQ;SYK;RASGRP1;FGL2;CORO1A;ITGB2;KLF4;SASH3;MBP;LAPTM5;PTPRC;LCK;AKNA;KLRK1
GOBP_NEGATIVE_REGULATION_OF_EPITHELIAL_CELL_DIFFERENTIATION													2.028															3															SPRY1;DLL1;ACVRL1
GOBP_T_CELL_DIFFERENTIATION							2.036	3.39	2.594	4.016	7.253	5.921										6	10	8	10	13	11										CD83;FGL2;ANXA1;NCKAP1L;PREX1;VSIR	ANXA1;VSIR;NCKAP1L;CD83;FGL2;SPI1;FCER1G;PREX1;SYK;CD86	FCER1G;NCKAP1L;PREX1;SYK;FGL2;IL6RA;VSIR;SPI1	FCER1G;PTPRC;TCF7;SYK;SASH3;FGL2;ANXA1;CD83;PTPN22;BCL2	KIT;CD83;RASGRP1;SYK;TCF7;LCK;FCER1G;PTPN22;PTPRC;BCL2;TOX;FGL2;SASH3	PTPN22;SYK;RASGRP1;FGL2;KIT;SASH3;PTPRC;LCK;TCF7;FCER1G;TOX
GOBP_REGULATION_OF_T_CELL_MEDIATED_CYTOTOXICITY								2.152	1.375		1.565												3	2		2												STX7;FCGR3;NCKAP1L	FCGR3;NCKAP1L		PTPRC;FCGR3
GOBP_REGULATION_OF_MAST_CELL_ACTIVATION_INVOLVED_IN_IMMUNE_RESPONSE							1.478		2.182	3.325		2.634										2		3	4		3										CD84;HMOX1		SYK;CD84;FGR	FGR;RAC2;LYN;SYK		SYK;RAC2;FGR
GOBP_AMYLOID_PRECURSOR_PROTEIN_METABOLIC_PROCESS							1.617															3															IFNGR1;RTN1;FKBP1A
GOBP_BLOOD_VESSEL_REMODELING															2.046															4															ACVRL1;MEF2C;NOS3;FLT4
GOBP_NEGATIVE_REGULATION_OF_LEUKOCYTE_CELL_CELL_ADHESION							3.155	4.826	3.507	2.17	2.437	1.963										6	9	7	5	5	4										FGL2;LAPTM5;ANXA1;NCKAP1L;KLF4;VSIR	ANXA1;VSIR;LAPTM5;NCKAP1L;KLF4;FCGR3;FGL2;VSIG4;CD86	FCGR3;NCKAP1L;FGL2;VSIG4;LAPTM5;VSIR;KLF4	PTPN22;LAPTM5;FGL2;ANXA1;KLF4	FCGR3;KLF4;PTPN22;LAPTM5;FGL2	KLF4;LAPTM5;PTPN22;FGL2
GOBP_B_CELL_PROLIFERATION								1.711		3.628	6.11	3.318			1.331								4		6	8	5			4								FCGR3;TYROBP;NCKAP1L;IFI205		PTPRC;TYROBP;SASH3;ATM;LYN;BCL2	RASGRP1;TYROBP;IFI205;FCGR3;PTPRC;ATM;SASH3;BCL2	ATM;RASGRP1;SASH3;TYROBP;PTPRC			MEF2C;CD320;TLR4;FCGR3
GOBP_BONE_RESORPTION										1.633		1.973													3		3													TNFAIP3;CSF1R;SYK		TNFAIP3;SYK;CSF1R
GOBP_REGULATION_OF_POTASSIUM_ION_TRANSPORT				1.573	2.04														3	4														CD63;FLNA;FHL1	FHL1;CD63;FLNA;RGS4
GOBP_RIBOSOMAL_SMALL_SUBUNIT_ASSEMBLY										1.856															2															RPS14;RPS19
GOBP_STEM_CELL_PROLIFERATION													3.327															5															NES;GJA1;MECOM;CD34;SOX17
GOBP_REGULATION_OF_CELL_FATE_COMMITMENT													1.515															2															BMP4;SOX17
GOBP_NEGATIVE_REGULATION_OF_PROTEIN_BINDING													1.441	2.214														3	6														ADAM15;PDGFB;NES	CSNK1E;ADAM15;DAB2;NES;PDGFB;CAV1
GOBP_REGULATION_OF_LAMELLIPODIUM_ORGANIZATION								1.575															3															WASF2;WAS;CD44
GOBP_NEURON_DEATH								2.021	2.383	1.629	1.503												9	9	7	6												LGMN;FCGR3;ARRB2;C1QA;TYROBP;LRRK2;ITGB2;AXL;PPT1	FCGR3;PPT1;LGMN;TYROBP;AXL;ARRB2;LRRK2;C1QA;ITGB2	BTG2;CORO1A;TYROBP;ATM;ITGB2;FYN;BCL2	CORO1A;TYROBP;FCGR3;FYN;ATM;BCL2
GOBP_TRANSFORMING_GROWTH_FACTOR_BETA_RECEPTOR_SIGNALING_PATHWAY				2.934	2.514	1.711							2.315	3.359	3.736				6	6	4							6	11	11				FBN1;COL1A2;LTBP4;THBS1;ITGA8;COL3A1	FOS;LTBP4;COL1A2;ITGA8;FBN1;COL3A1	COL1A2;FBN1;ITGA8;ENG							SPRY1;LTBP4;SMAD6;ACVRL1;COL3A1;FKBP1A	ACVRL1;CLDN5;SKI;TGFBR3;DAB2;CAV2;ZEB2;LTBP4;COL3A1;CAV1;SMAD6	DAB2;COL3A1;ENG;ZEB2;TGFBR3;CAV2;CDH5;CLDN5;SMAD6;PXN;ACVRL1
GOBP_PLASMA_MEMBRANE_RAFT_ORGANIZATION														1.622															2															CAV2;CAV1
GOBP_PROTEIN_TETRAMERIZATION											1.509															3															EVL;SAMHD1;GBP5
GOBP_REGULATION_OF_CYTOPLASMIC_TRANSPORT									1.398															2															DAB2;LRRK2
GOBP_SCHWANN_CELL_DEVELOPMENT													1.454	1.592														2	3														LAMB2;ADGRG6	ADGRG6;SKI;LAMB2
GOBP_CORTICAL_ACTIN_CYTOSKELETON_ORGANIZATION							1.365	2.757														2	4														PLEK;NCKAP1L	NCKAP1L;PLEK;EPB41L2;EPB41L3
GOBP_CELLULAR_RESPONSE_TO_PROSTAGLANDIN_STIMULUS										1.696		1.961													2		2													PTGER2;GNG2		GNG2;PTGER2
GOBP_SEMI_LUNAR_VALVE_DEVELOPMENT													2.056	1.984	1.427													3	4	3													BMP4;TIE1;SMAD6	TIE1;BMP4;GJA5;SMAD6	SMAD6;NOS3;TIE1
GOBP_ERK1_AND_ERK2_CASCADE								2.881	1.708	1.419	1.699	1.421	1.657	4.089	2.408								10	7	6	6	5	6	15	11								DUSP6;DAB2;GLIPR2;CSF1R;GNAI2;ARRB2;PYCARD;SYK;CD44;CTSH	MARCO;CSF1R;PYCARD;ARRB2;DAB2;SYK;GNAI2	CD44;CSF1R;PTPRC;SYK;LYN;PTPN22	CSF1R;RASGRP1;SYK;PTPRC;PTPN22;CD44	PTPN22;SYK;RASGRP1;CSF1R;PTPRC	SPRY1;BMP4;GRB10;ICAM1;APP;PDGFB	AKAP12;BMP4;DUSP5;SPRY4;TGFBR3;ACKR3;APP;DAB2;TLR4;CNKSR3;GRB10;TEK;KDR;PDGFB;SEMA6A	FLT4;AKAP12;DAB2;GNAI2;PDGFB;SEMA6A;TGFBR3;TLR4;ICAM1;CNKSR3;KDR
GOBP_CARDIAC_SEPTUM_MORPHOGENESIS															1.558															4															SMAD6;ENG;NOS3;TGFBR3
GOBP_REGULATION_OF_SMOOTH_MUSCLE_CELL_DIFFERENTIATION													1.352															2															BMP4;PDGFB
GOBP_T_CELL_PROLIFERATION							1.939	5.232	4.916	5.094	4.76	6.188	1.354									5	11	10	10	9	10	4									ICOSL;ANXA1;VCAM1;NCKAP1L;VSIR	ANXA1;VSIR;NCKAP1L;PYCARD;SYK;AIF1;VSIG4;VCAM1;ICOSL;SLC11A1;CD86	VCAM1;SLC11A1;CD55;AIF1;ICOSL;PYCARD;NCKAP1L;SYK;VSIG4;VSIR	PTPN22;PTPRC;SLC11A1;CORO1A;RAC2;SASH3;SYK;ANXA1;FYN;AIF1	RASGRP1;CORO1A;SYK;FYN;PRKCQ;PTPN22;PTPRC;AIF1;SASH3	AIF1;PTPN22;SLC11A1;PRKCQ;RAC2;SYK;RASGRP1;SASH3;CORO1A;PTPRC	ANXA1;GJA1;BMP4;SLC7A1
GOBP_T_CELL_DIFFERENTIATION_IN_THYMUS											2.358	1.764														4	3														RASGRP1;PTPRC;TOX;BCL2	PTPRC;RASGRP1;TOX
GOBP_RESPONSE_TO_PAIN				1.659															2															THBS1;EDNRB
GOBP_REGULATION_OF_CELL_ADHESION				4.283	3.38	2.271	4.495	6.896	4.416	11.396	12.596	9.488	4.078	5.04	5.255				13	13	9	16	24	18	28	27	22	15	26	25				FBLN1;COL1A1;MMP2;FBLN2;FLNA;KLF4;CCDC80;THBS1;THY1;SEMA5A;TPM1;PRKG1;NID1	COL1A1;SFRP1;KLF4;FBLN1;SEMA5A;FLNA;CCDC80;MMP2;THY1;TPM1;NID1;FBLN2;PRKG1	C1QTNF1;THY1;NID1;CCDC80;SERPINE1;KLF4;COL1A1;TPM1;FBLN1	ICOSL;CD83;IL1RN;VSIR;FGL2;LAPTM5;PTAFR;ANXA1;VCAM1;THBS1;NCKAP1L;TGFBI;KLF4;PREX1;LIMS1;CXCR4	PTAFR;VSIR;KLF4;FCGR3;FGL2;PYCARD;SPI1;CD44;VSIG4;MAP3K8;LAPTM5;AIF1;ANXA1;NCKAP1L;CD83;ICOSL;VCAM1;DAB2;LIMS1;PREX1;SYK;TGFBI;ITGB2;CD86	FCGR3;VCAM1;KLF4;CD55;AIF1;ITGB2;ICOSL;PYCARD;DAB2;NCKAP1L;SYK;FGL2;VSIG4;LAPTM5;PREX1;VSIR;TGFBI;SPI1	ETS1;LAPTM5;CXCR4;PTPN22;AIF1;BCL2;MBP;CD44;RAC2;TGFBI;FGL2;ANXA1;CD83;FLNA;ARHGDIB;CORO1A;SASH3;SYK;ATM;KLRK1;LYN;FYN;SEMA4D;AKNA;PTPRC;ITGB2;ADGRG1;KLF4	ETS1;CD83;ADGRG1;LCK;SYK;FCGR3;PTPN22;AIF1;RASGRP1;AKNA;CORO1A;TGFBI;PRKCQ;LAPTM5;KLRK1;SASH3;FLNA;KLF4;SEMA4D;ARHGDIB;FYN;MBP;PTPRC;BCL2;ATM;CD44;FGL2	PRKCQ;ARHGDIB;SYK;LAPTM5;LCK;ADGRG1;TGFBI;AIF1;RAC2;FGL2;CORO1A;ITGB2;KLF4;KLRK1;SASH3;SEMA4D;PTPN22;ATM;RASGRP1;MBP;PTPRC;AKNA	ANGPT2;ADGRG1;BMP4;ADAM15;KLF4;DLL1;PDGFB;LIMCH1;ACVRL1;ANXA1;NEDD9;FBLN2;COL8A1;NID1;SLC7A1	ACVRL1;ADAM15;COL8A1;VCAM1;EFNB2;DLC1;PDGFB;ABI3BP;DLL1;BMP4;KLF4;FBLN2;NID1;KDR;SLC7A1;CDH13;SELP;SPRY4;ADGRG1;DAB2;MMRN1;CAV1;SEMA6A;MAPK7;TEK;FCGR3	PLXND1;CLEC4G;ADAM15;ADGRG1;ACVRL1;C1QTNF1;MAPK7;CDH13;SEMA6A;PDGFB;SELP;DLL1;ITGA5;SERPINE1;VCAM1;ABI3BP;CD55;KDR;DAB2;FCGR3;LIMCH1;NEDD9;NID1;KLF4;PEAK1
GOBP_GRANULOCYTE_MIGRATION							2.48	5.828	4.454	2.921	2.489	4.498										5	10	8	6	5	7										MPP1;THBS1;ANXA1;NCKAP1L;PREX1	ANXA1;NCKAP1L;CSF1R;PREX1;FCER1G;S100A9;SYK;ITGB2;MPP1;S100A8	S100A8;S100A9;CSF1R;FCER1G;NCKAP1L;SYK;PREX1;ITGB2	FCER1G;CSF1R;RAC2;SYK;ITGB2;ANXA1	CSF1R;SYK;FCER1G;S100A8;S100A9	RAC2;S100A9;SYK;ITGB2;CSF1R;S100A8;FCER1G
GOBP_POSITIVE_REGULATION_OF_LEUKOCYTE_PROLIFERATION							1.658	4.433	4.01	5.921	5.547	5.012										4	9	8	10	9	8										VCAM1;ICOSL;ANXA1;NCKAP1L	ANXA1;NCKAP1L;CSF1R;PYCARD;SYK;AIF1;ICOSL;VCAM1;CD86	VCAM1;CD55;AIF1;CSF1R;ICOSL;PYCARD;NCKAP1L;SYK	CSF1R;PTPRC;CORO1A;SYK;SASH3;LYN;ANXA1;PTPN22;AIF1;BCL2	CSF1R;CORO1A;SYK;PRKCQ;PTPN22;PTPRC;AIF1;SASH3;BCL2	AIF1;PTPN22;PRKCQ;SYK;SASH3;CSF1R;CORO1A;PTPRC
GOBP_PINOCYTOSIS							1.718	2.415	2.594													2	3	3													AXL;PPT1	PYCARD;AXL;PPT1	AXL;PPT1;PYCARD
GOBP_POSITIVE_REGULATION_OF_NATURAL_KILLER_CELL_MEDIATED_CYTOTOXICITY											1.726	1.861														2	2														RASGRP1;KLRK1	KLRK1;RASGRP1
GOBP_REGULATION_OF_SPROUTING_ANGIOGENESIS				1.378			2.044					1.333	2.834	2.525	3.63				2			3					2	4	5	6				THBS1;KLF4			KLF4;PKM;THBS1					KLF4;KLF2	RHOJ;ADAMTS9;KLF4;DLL1	KLF2;KLF4;ADAMTS9;DLL1;SEMA6A	ITGA5;SEMA6A;KLF2;CEMIP2;DLL1;KLF4
GOBP_TAXIS							1.922	4.826	4.409	4.1	3.724	6.263		2.068	2.421							9	18	16	15	13	16		16	16							MPP1;PTAFR;ANXA1;VCAM1;PLP2;THBS1;NCKAP1L;CXCR4;PREX1	ANXA1;PTAFR;FOLR2;PLP2;NCKAP1L;LGMN;CSF1R;ARRB2;SPI1;PREX1;S100A9;AIF1;FCER1G;SYK;VCAM1;ITGB2;MPP1;S100A8	VCAM1;FPR1;S100A8;AIF1;S100A9;LGMN;CSF1R;FCER1G;ARRB2;NCKAP1L;FOLR2;SYK;PREX1;IL6RA;ITGB2;SPI1	RPS19;SEMA4D;CSF1R;FCER1G;CORO1A;RAC2;SYK;ITGB2;KLRK1;LYN;ANXA1;CXCR4;CCR5;FYN;AIF1	CSF1R;KIT;CORO1A;FCER1G;SYK;SEMA4D;FYN;PRKCQ;S100A8;CCR5;AIF1;S100A9;KLRK1	AIF1;FPR1;RAC2;PRKCQ;S100A9;BIN2;SYK;KIT;CORO1A;CSF1R;ITGB2;S100A8;KLRK1;CCR5;FCER1G;SEMA4D		EDNRB;CDH13;BMP4;ITGA9;PDGFB;LAMB2;ACKR3;RELN;APP;EFNB2;PTPRM;VCAM1;KLF7;KDR;EPHB4;SEMA6A	PDGFB;SEMA6A;KLF7;LGMN;CDH13;ITGA9;ROBO4;PLXND1;EPHB4;SEMA3F;SERPINE1;FLT1;PTPRM;RELN;VCAM1;KDR
GOBP_MULTICELLULAR_ORGANISMAL_IRON_ION_HOMEOSTASIS								2.018	2.144														2	2														SLC11A1;SLC40A1	SLC11A1;SLC40A1
GOBP_NEUTROPHIL_DEGRANULATION								4.334	3.071	1.889		2.167											4	3	2		2											PTAFR;SPI1;SYK;ITGB2	ITGB2;SYK;SPI1	ITGB2;SYK		SYK;ITGB2
GOBP_POSITIVE_REGULATION_OF_ENDOCYTOSIS							2.109	4.786	5.172													4	8	8													AXL;RAB31;PPT1;NCKAP1L	NCKAP1L;DAB2;RAB31;ARRB2;SYK;LRRK2;AXL;PPT1	RAB31;PPT1;AXL;ARRB2;DAB2;NCKAP1L;LRRK2;SYK
GOBP_ECTODERMAL_CELL_DIFFERENTIATION															1.851															2															ETS2;ITGA6
GOBP_INTRINSIC_APOPTOTIC_SIGNALING_PATHWAY_IN_RESPONSE_TO_DNA_DAMAGE_BY_P53_CLASS_MEDIATOR											1.314															2															CD44;BCL2
GOBP_NEGATIVE_REGULATION_OF_IMMUNE_EFFECTOR_PROCESS							2.711	4.541	4.936	1.794	1.35											5	8	8	4	3											FGL2;ANXA1;CD84;NCKAP1L;HMOX1	ANXA1;NCKAP1L;FCGR3;FGL2;ARRB2;SPI1;VSIG4;CD84	FCGR3;CD55;ARRB2;NCKAP1L;VSIG4;FGL2;CD84;SPI1	RPS19;FGL2;ANXA1;PTPRC	PTPRC;FCGR3;FGL2
GOBP_RESPONSE_TO_PROGESTERONE							1.375			2.095		2.454										2			3		3										TLR2;THBS1			PTGER2;TLR2;MBP		MBP;PTGER2;TLR2
GOBP_TRYPTOPHAN_CATABOLIC_PROCESS			2.011															2															TDO2;HAAO
GOBP_POSITIVE_REGULATION_OF_GAMMA_DELTA_T_CELL_DIFFERENTIATION								2.201	2.336	2.376	2.497	2.672											2	2	2	2	2											SYK;NCKAP1L	NCKAP1L;SYK	SYK;PTPRC	SYK;PTPRC	SYK;PTPRC
GOBP_POSITIVE_REGULATION_OF_ACTIN_FILAMENT_POLYMERIZATION								2.407	1.749			1.307											4	3			2											PYCARD;HCK;NCKAP1L;CDC42EP3	HCK;NCKAP1L;PYCARD			HCK;EVL
GOBP_RENAL_SYSTEM_VASCULATURE_DEVELOPMENT				1.648	1.527								3.456	3.289					2	2								4	5					NOTCH3;ACTA2	ACTA2;NOTCH3								ANGPT2;CD34;BMP4;PDGFB	BMP4;PECAM1;TEK;PDGFB;CD34
GOBP_TOLL_LIKE_RECEPTOR_SIGNALING_PATHWAY										1.664		1.383													4		3													TLR2;PTPN22;TNFAIP3;LYN		TNFAIP3;TLR2;PTPN22
GOBP_NEURAL_CREST_CELL_DIFFERENTIATION					1.492															3															EDNRB;SEMA5A;SFRP1
GOBP_CELLULAR_RESPONSE_TO_NUTRIENT					1.35															2															COL1A1;SFRP1
GOBP_CELLULAR_RESPONSE_TO_HEAT							1.844			1.664												3			3												IER5;HMOX1;THBS1			ATM;IER5;LYN
GOBP_CELLULAR_RESPONSE_TO_HORMONE_STIMULUS	1.638						2.351	1.997	2.012	2.222		2.151	1.512	1.546	1.782	10						10	12	11	11		9	8	14	14	GRB14;GHR;AR;HMGCS2;ERRFI1;ACSL1;SRD5A1;STAT3;FGB;APOB						PRKCB;CTSH;CTSB;NAMPT;PKM;ANXA1;SGK1;GNAI2;CYBA;RAB31	ANXA1;CTSB;PKM;DAB2;RAB31;GNAI2;UCP2;CYBA;AIF1;NAMPT;CTSH;PRKCB	RAB31;AIF1;PRKCB;NAMPT;UCP2;DAB2;PKM;SGK1;CYBA;CTSB;GNAI2	NFKB1;GNG2;PIP4K2A;RAB31;LEPROTL1;LYN;ANXA1;SGK1;PTGER2;PRKCB;AIF1		AIF1;GNG2;PRKCQ;PIP4K2A;KIT;SGK1;PRKCB;PTGER2;RAB31	SGK1;NAMPT;BMP4;SOGA1;GRB10;IGFBP7;ANXA1;LMO2	UGCG;BMP4;TFPI;MEF2C;PRCP;NAMPT;IGFBP7;DAB2;RAMP2;CAV2;CAV1;GRB10;PLPP1;LMO2	NAMPT;DAB2;RAMP2;GNAI2;MEF2C;SOGA1;PXN;CAV2;SGK1;MYO1C;IGFBP7;PRCP;TFPI;AQP1
GOBP_POSITIVE_REGULATION_OF_PROTEIN_PHOSPHORYLATION								1.765	3.039	3.325	3.033	2.53			2.073								13	15	15	13	11			17								NCKAP1L;FGD2;RAP2B;DAB2;CCDC88A;CSF1R;ARRB2;SYK;AIF1;CD44;LRRK2;SLC11A1;CD86	SLC11A1;MARCO;AIF1;RAP2B;CCDC88A;HCLS1;CSF1R;ARRB2;DAB2;NCKAP1L;LRRK2;SYK;PILRB1;IL6RA;FGD2	CD44;SEMA4D;CSF1R;PTPRC;SLC11A1;SYK;CCDC88A;ATM;HCLS1;CCND2;NCF1;LYN;FYN;AIF1;BCL2	CSF1R;KIT;CCDC88A;RASGRP1;SYK;CCND2;SEMA4D;FYN;PTPRC;ATM;AIF1;CD44;BCL2	AIF1;SLC11A1;CCDC88A;ATM;SYK;RASGRP1;KIT;CSF1R;PTPRC;HCLS1;SEMA4D			FLT4;DAB2;ITGA5;TAL1;SH2D3C;PDGFB;TCIM;ENG;PECAM1;TLR4;EHD4;FLT1;LIMCH1;ACVRL1;NEDD9;RELN;KDR
GOBP_ALPHA_BETA_T_CELL_ACTIVATION							2.223	2.865	2.468	3.325	4.531	3.22										5	7	6	7	8	6										CD83;ANXA1;WDFY4;NCKAP1L;VSIR	ANXA1;VSIR;NCKAP1L;WDFY4;CD83;SYK;CD86	CD55;NCKAP1L;SYK;IL6RA;VSIR;WDFY4	PTPRC;SYK;SASH3;ANXA1;CD83;PTPN22;BCL2	CD83;SYK;PRKCQ;PTPN22;PTPRC;TOX;BCL2;SASH3	PTPN22;PRKCQ;SYK;SASH3;PTPRC;TOX
GOBP_NEUROGENESIS				1.587	1.609				1.485	2.027	2.196	2.709	1.74	2.08	1.529				13	15				20	21	19	19	17	33	28				MMP2;FLNA;KLF4;ITM2C;NOTCH3;SEMA5A;THY1;ENAH;LAMB1;VIM;COL3A1;PRKG1;EDNRB	EDNRB;VIM;SFRP1;KLF4;LAMB1;TBX2;SEMA5A;FLNA;NOTCH3;MMP2;THY1;ENAH;COL3A1;ITM2C;PRKG1				VCAM1;VIM;S100A9;CCDC88A;AXL;DAB2;NCKAP1L;IFNGR1;S100A6;LRRK2;S100A8;TLR2;EPB41L3;PPT1;SGK1;SRGAP2;CSF1R;C1QA;LST1;KLF4	TLR2;SGK1;CXCR4;BCL2;MBP;BTG2;CSF1R;RAC2;ANXA1;CYFIP2;FLNA;VIM;LST1;PRKCH;CCDC88A;LYN;FYN;SEMA4D;AKNA;ADGRG1;KLF4	KIT;ADGRG1;CYFIP2;S100A8;TOX;CCDC88A;AKNA;PRKCQ;GPRIN3;FLNA;KLF4;SEMA4D;FYN;MBP;S100A9;PRKCH;BCL2;CSF1R;VIM	PRKCQ;CCDC88A;S100A9;CYFIP2;CSF1R;PRKCH;ADGRG1;RAC2;KLF4;SGK1;LST1;KIT;TOX;SEMA4D;VIM;MBP;TLR2;S100A8;AKNA	ITGA6;SGK1;BMP4;ADGRG1;VIM;ADGRG6;GPM6A;GJA1;KLF4;DLL1;TIAM1;DPYSL3;LAMB2;ANXA1;NAV1;COL3A1;APP	UGCG;TAL1;ITGA6;MEF2C;PREX2;EFNB2;TIAM1;VCAM1;KLF7;GPM6A;DLL1;DPYSL3;BMP4;ADGRG6;RELN;KLF4;EPHB4;APP;CSNK1E;NAV1;SKI;ADGRG1;DAB2;PTPRM;PCDH12;VIM;HECW2;SEMA6A;EDNRB;LAMB2;TLR4;NRN1;COL3A1	KLF7;PLXND1;HERC1;ADGRG1;ITGA6;RELN;MEF2C;SEMA6A;ROBO4;DLL1;PTPRM;CSNK1E;DPYSL3;TCF4;SGK1;PCDH12;VCAM1;DAB2;TAL1;EPHB4;SEMA3F;VIM;TLR4;SHANK3;PREX2;NDRG1;COL3A1;KLF4
GOBP_REGULATION_OF_MITOTIC_CELL_CYCLE_PHASE_TRANSITION										1.446															6															KLF4;ATM;ANXA1;CCND2;AIF1;BCL2
GOBP_FC_GAMMA_RECEPTOR_SIGNALING_PATHWAY								3.13	4.573	5.951	4.906	5.227											4	5	6	5	5											FCER1G;HCK;FCGR3;SYK	FCGR3;FGR;FCER1G;SYK;HCK	FCER1G;PTPRC;SYK;FGR;LYN;FYN	FCER1G;SYK;FCGR3;FYN;PTPRC	HCK;FGR;SYK;PTPRC;FCER1G
GOBP_NEGATIVE_REGULATION_OF_VASCULAR_PERMEABILITY														2.08	2.198														3	3														AKAP12;CLDN5;RAMP2	AKAP12;RAMP2;CLDN5
GOBP_LYMPHOCYTE_MIGRATION										1.867	1.412	2.291													4	3	4													STK10;ITGAL;AIF1;KLRK1	STK10;KLRK1;AIF1	KLRK1;STK10;AIF1;ITGAL
GOBP_POSITIVE_REGULATION_OF_LIPID_TRANSPORT			1.971												1.336			4												4			CYP4A32;CYP8B1;ACSL1;SCP2												ANXA2;DAB2;C1QTNF1;ABCG1
GOBP_IMMUNE_RESPONSE_REGULATING_SIGNALING_PATHWAY							3.348	6.325	8.559	5.933	8.642	10.278										10	17	19	15	17	18										PRKCB;CTSH;ICOSL;KLHL6;LAPTM5;TLR2;NFAM1;NCKAP1L;CYBA;TYROBP	NCKAP1L;LAPTM5;NFAM1;KLHL6;FCGR3;CYBA;FYB;ARRB2;IFI205;FCER1G;TYROBP;HCK;SYK;ICOSL;THEMIS2;CTSH;PRKCB	ICOSL;ARRB2;NCKAP1L;HCK;FCGR3;SYK;CYBA;FPR1;NFAM1;PRKCB;TLR2;FCER1G;SLC15A3;THEMIS2;FYB;FGR;KLHL6;TYROBP;LAPTM5	PTPN22;TLR2;FCER1G;PTPRC;TYROBP;TNFAIP3;PRKCH;SYK;LAPTM5;KLRK1;FGR;LYN;PRKCB;FYN;BCL2	KIT;PRKCB;FYB;SYK;LCK;IFI205;FCGR3;FCER1G;TYROBP;FYN;PRKCQ;PTPN22;PTPRC;LAPTM5;PRKCH;KLRK1;BCL2	HCK;FPR1;PRKCQ;FGR;TNFAIP3;FYB;PTPN22;SYK;KIT;PRKCH;TYROBP;TLR2;LAPTM5;PTPRC;LCK;KLRK1;PRKCB;FCER1G
GOBP_ORGANIC_ACID_TRANSPORT			1.904															7															CYP4A32;ACSL1;ABCC3;PLIN2;SLC7A2;ABAT;FABP1
GOBP_ERYTHROCYTE_HOMEOSTASIS							1.79		1.449	3.631	1.764	1.955		1.674								4		4	7	4	4		6								AXL;NCKAP1L;HCLS1;HMOX1		AXL;NCKAP1L;HCLS1;SPI1	RPS19;ETS1;HCLS1;KLF2;RPS14;IKZF1;LYN	ETS1;KIT;IKZF1;KLF2	IKZF1;HCLS1;KLF2;KIT		TAL1;KLF2;BMP4;TGFBR3;TMOD3;ADGRF5
GOBP_REGULATION_OF_SECRETION							2.223	3.555	4.775	1.384		1.625										10	16	17	9		8										PRKCB;PTAFR;ANXA1;SGK1;TLR2;GNAI2;CD84;NCKAP1L;CYBA;HMOX1	ANXA1;PTAFR;NCKAP1L;DAB2;FCGR3;GNAI2;UCP2;CYBA;LRRK2;SPI1;SYK;CD84;ITGB2;S100A8;FRMD4A;PRKCB	FCGR3;S100A8;PRKCB;FGR;TLR2;SPI1;UCP2;FRMD4A;DAB2;LRRK2;SYK;NCKAP1L;CYBA;SGK1;ITGB2;CD84;GNAI2	TLR2;RAC2;SYK;ITGB2;FGR;LYN;ANXA1;SGK1;PRKCB		FGR;RAC2;SYK;ITGB2;SGK1;TLR2;S100A8;PRKCB
GOBP_REGULATION_OF_CYTOSOLIC_CALCIUM_ION_CONCENTRATION										2.584	1.979	2.246													9	7	7													CD52;PTPRC;CORO1A;LYN;CXCR4;PTGER2;CCR5;FYN;BCL2	CORO1A;LCK;FYN;PTPRC;CCR5;CD52;BCL2	FPR1;CD52;CORO1A;PTPRC;LCK;PTGER2;CCR5
GOBP_REGULATION_OF_EPITHELIAL_TO_MESENCHYMAL_TRANSITION													1.38															3															SPRY1;BMP4;TIAM1
GOBP_NEGATIVE_REGULATION_OF_AXONOGENESIS
GOBP_PROTEIN_LOCALIZATION_TO_PLASMA_MEMBRANE											1.359															5															CCDC88A;FLNA;FYB;RAB31;PRKCH
GOBP_GRANULOCYTE_DIFFERENTIATION							1.405		2.072													2		3													HCLS1;C1QC		HCLS1;C1QC;SPI1
GOBP_LEUKOCYTE_DIFFERENTIATION							4.605	6.544	6.66	6.438	8.429	7.543										14	20	19	18	19	17										CD83;C1QC;FGL2;ANXA1;TLR2;VCAM1;NFAM1;HCLS1;NCKAP1L;AXL;TYROBP;IRF8;PREX1;VSIR	VSIR;TET2;FCGR3;CSF1R;FGL2;SPI1;C1QC;IRF8;MERTK;FCER1G;AXL;ANXA1;NCKAP1L;CD83;VCAM1;NFAM1;PREX1;SYK;TYROBP;CD86	VCAM1;AXL;NCKAP1L;FCGR3;SYK;NFAM1;TLR2;HCLS1;FCER1G;C1QC;IRF8;IL6RA;CSF1R;TYROBP;PREX1;FGL2;MERTK;VSIR;SPI1	FCER1G;CSF1R;TLR2;PTPRC;TCF7;TYROBP;SASH3;SYK;ATM;HCLS1;FGL2;TET2;IKZF1;LYN;ANXA1;CD83;PTPN22;BCL2	KIT;CD83;SYK;FCER1G;LCK;FCGR3;PTPN22;TOX;RASGRP1;TET2;SASH3;IKZF1;PTPRC;TYROBP;BCL2;CSF1R;TCF7;ATM;FGL2	PTPN22;ATM;IKZF1;SYK;RASGRP1;KIT;CSF1R;FGL2;TYROBP;TLR2;SASH3;PTPRC;LCK;TCF7;HCLS1;FCER1G;TOX
GOBP_NEGATIVE_REGULATION_OF_TORC1_SIGNALING										1.77	1.888														2	2														ATM;SESN1	SESN1;ATM
GOBP_ENDOCRINE_HORMONE_SECRETION						1.425															2															C1QTNF1;AGTR1A
GOBP_MUSCULAR_SEPTUM_MORPHOGENESIS														1.984															2															BMP4;TGFBR3
GOBP_SPECIFICATION_OF_ANIMAL_ORGAN_IDENTITY													1.352															2															SPRY1;BMP4
GOBP_POSITIVE_REGULATION_OF_MYELOID_CELL_DIFFERENTIATION							1.436															3															TYROBP;HCLS1;NCKAP1L
GOBP_REGULATION_OF_CELL_POPULATION_PROLIFERATION				2.269	1.93	3.073	3.542	3.882	5.389	6.48	4.121	6.516	4.423	7.818	10.383				15	16	16	22	30	31	32	24	27	24	49	51				FBLN1;MMP2;IGFBP7;LAMC1;SPARC;KLF4;IGFBP5;NOTCH3;THBS1;SEMA5A;TPM1;LAMB1;ADAMTS1;PRKG1;EDNRB	EDNRB;LAMC1;SFRP1;LAMB1;FBLN1;TBX2;SPARC;KLF4;SEMA5A;IGFBP3;NOTCH3;MMP2;IGFBP7;TPM1;IGFBP5;PRKG1	IGFBP5;LAMC1;SPARC;ENG;NOTCH3;ADAMTS1;KLF4;AGTR1A;IGFBP3;TBX2;LAMB1;IGFBP7;ITGA1;PTH1R;TPM1;FBLN1	SGK1;CYBA;TYROBP;CTSH;ANXA1;TLR2;VCAM1;HCLS1;IER5;NAMPT;PTAFR;GNAI2;THBS1;NCKAP1L;HMOX1;KLF4;S100A6;ICOSL;LST1;S100A11;LIMS1;VSIR	PTAFR;S100A11;VSIR;KLF4;FCGR3;CSF1R;PYCARD;VSIG4;IFI205;AIF1;NAMPT;LRRK2;CTSH;S100A6;ANXA1;FOLR2;NCKAP1L;GNAI2;CYBA;HCK;ICOSL;VCAM1;LGMN;DAB2;CCDC88A;JARID2;LIMS1;SYK;TYROBP;CD86	VCAM1;CD55;CCDC88A;ICOSL;DAB2;NCKAP1L;HCK;GNAI2;JARID2;FCGR3;AIF1;S100A6;PYCARD;IER5;LRRK2;SYK;S100A11;CYBA;NAMPT;TLR2;LGMN;HCLS1;SGK1;FOLR2;IL6RA;CSF1R;TYROBP;VSIG4;LST1;VSIR;KLF4	TLR2;ETS1;SGK1;PTPN22;AIF1;BCL2;JARID2;BTG2;CSF1R;TYROBP;TNFAIP3;RAC2;BTG1;RPS15A;ANXA1;CCND2;LST1;CORO1A;PRKCH;SASH3;SYK;ATM;CCDC88A;HCLS1;LYN;PTGER2;PTPRC;PBXIP1;IER5;ADGRG1;S100A11;KLF4	ETS1;KIT;ADGRG1;SYK;IFI205;FCGR3;PTPN22;AIF1;TOX;CCDC88A;CORO1A;PRKCQ;SASH3;JARID2;PBXIP1;CCND2;KLF4;S100A11;PTPRC;PRKCH;TYROBP;BCL2;CSF1R;ATM	PRKCQ;CCDC88A;PBXIP1;SYK;PRKCH;CSF1R;ADGRG1;AIF1;RAC2;CORO1A;KLF4;SGK1;HCLS1;LST1;HCK;KIT;SASH3;PTGER2;TOX;PTPN22;ATM;TNFAIP3;TYROBP;TLR2;PTPRC;JARID2;S100A11	NES;ADGRG1;CD320;GJA1;KLF4;TIAM1;SPARC;ACVRL1;APP;NAMPT;PTPN14;IGFBP7;VASH1;TIE1;SLC7A1;IL33;SOX17;SGK1;SPRY1;BMP4;DLL1;SMAD6;ANXA1;PDGFB	TAL1;ACVRL1;EPOR;MMRN2;MEF2C;NAMPT;TGFBR3;PTGS1;ACKR3;EFNB2;TIAM1;VCAM1;DLC1;PDGFB;IL33;DLL1;PTPN14;MARCKSL1;BMP4;TRP53I11;EGFL7;KLF4;IGFBP7;CAV2;MEIS2;RPS6KA2;KDR;SLC7A1;APP;SMAD6;CDH13;NPR1;CALCRL;SKI;ADGRG1;PLAC8;TIE1;PTPRM;DAB2;SPARC;CAV1;IGFBP3;EDNRB;PLPP1;CLDN5;TLR4;NES;TEK;FCGR3	NAMPT;CALCRL;ECM1;PLAC8;CLEC4G;IGFBP3;CLDN5;ADGRG1;SMAD6;EPOR;ACVRL1;MEF2C;SPARC;CDH13;PDGFB;TRP53I11;DLL1;SOX7;PTPRM;IL33;AQP1;WWTR1;FLT4;CD320;EGFL7;LGMN;ENG;RPS6KA2;TGFBR3;MARCKSL1;CAV2;NOS3;FLT1;SGK1;VCAM1;ADAMTS1;CD55;KDR;DAB2;PTGS1;GNAI2;TAL1;SOX17;TIE1;TLR4;CDH5;FCGR3;IGFBP7;NDRG1;MMRN2;KLF4
GOBP_CELLULAR_RESPONSE_TO_LIPOPROTEIN_PARTICLE_STIMULUS								2.048	2.215	2.3	1.503	2.672		1.567	1.644								3	3	3	2	3		3	3								ITGB2;FCER1G;SYK	ITGB2;SYK;FCER1G	ITGB2;FCER1G;SYK	FCER1G;SYK	SYK;FCER1G;ITGB2		CDH13;TLR4;ABCG1	ABCG1;TLR4;CDH13
GOBP_NEGATIVE_REGULATION_OF_SMOOTH_MUSCLE_CELL_MIGRATION				2.858	3.785	4.281									1.806				3	4	4									3				IGFBP5;PRKG1;TPM1	PRKG1;IGFBP5;IGFBP3;TPM1	IGFBP3;TPM1;SERPINE1;IGFBP5									MEF2C;SERPINE1;IGFBP3
GOBP_CELL_CELL_SIGNALING_BY_WNT					2.171							1.333	1.533	1.873						8							6	7	13						EDNRB;COL1A1;SFRP1;KLF4;SEMA5A;RBMS3;GPC6;CPE							TNFAIP3;PBXIP1;KLF4;TLR2;TCF7;ZEB2	HIC1;GRB10;KLF4;TIAM1;PRICKLE2;APP;SOX17	EDNRB;CSNK1E;TCF7L1;SKI;KLF4;DAB2;TIAM1;ZEB2;GRB10;CPE;RBMS3;CAV1;APP
GOBP_POSITIVE_REGULATION_OF_VASCULAR_ASSOCIATED_SMOOTH_MUSCLE_CELL_PROLIFERATION				2.512	1.419	1.581							1.352		1.513				3	2	2							2		3				IGFBP5;ADAMTS1;MMP2	MMP2;IGFBP5	IGFBP5;ADAMTS1							GJA1;PDGFB		GNAI2;PDGFB;ADAMTS1
GOBP_MRNA_CATABOLIC_PROCESS										1.856															6															BTG2;SLC11A1;ATM;VIM;TENT5C;PABPC4
GOBP_FC_RECEPTOR_MEDIATED_STIMULATORY_SIGNALING_PATHWAY								2.989	4.4	5.738	4.706	5.039											4	5	6	5	5											FCER1G;HCK;FCGR3;SYK	FCGR3;FGR;FCER1G;SYK;HCK	FCER1G;PTPRC;SYK;FGR;LYN;FYN	FCER1G;SYK;FCGR3;FYN;PTPRC	HCK;FGR;SYK;PTPRC;FCER1G
GOBP_POSITIVE_REGULATION_OF_PROTEIN_SERINE_THREONINE_KINASE_ACTIVITY											2.339	1.982														6	5														CSF1R;KIT;RASGRP1;SYK;CCND2;PTPRC	SYK;RASGRP1;KIT;CSF1R;PTPRC
GOBP_ENDOTHELIAL_CELL_CHEMOTAXIS				1.725															2															THBS1;SEMA5A
GOBP_RESPONSE_TO_ESTROGEN	1.436															3															APOA2;SRD5A1;AR
GOBP_POSITIVE_REGULATION_OF_PROTEIN_LOCALIZATION_TO_MEMBRANE											1.368															3															PRKCH;GZMB;FYN
GOBP_MALE_GENITALIA_DEVELOPMENT	1.406															2															SRD5A1;AR
GOBP_INTERLEUKIN_8_PRODUCTION	1.818						1.557	1.745	1.949	3.693	2.265	3.38				4						3	4	4	6	4	5				CRP;STAT3;MAVS;APOA2						TLR2;KLF4;ANXA1	ANXA1;KLF4;SYK;PYCARD	PYCARD;TLR2;SYK;KLF4	KLF4;TLR2;PTPRC;SYK;ANXA1;PTPN22	SYK;PTPRC;KLF4;PTPN22	PTPN22;SYK;KLF4;TLR2;PTPRC
GOBP_CELLULAR_HORMONE_METABOLIC_PROCESS	1.507															4															SRD5A1;ALDH1A7;CYP3A13;ADH4
GOBP_REGULATION_OF_COLLAGEN_METABOLIC_PROCESS					1.392	2.434	1.365	1.816	1.993				1.316							2	3	2	3	3				2							MFAP4;VIM	MFAP4;VIM;ENG	VIM;VSIR	VSIR;VIM;ARRB2	ARRB2;VSIR;VIM				BMP4;VIM
GOBP_REGULATION_OF_MYELOID_LEUKOCYTE_MEDIATED_IMMUNITY							2.674	5.113	5.449	4.437	1.867	4.006										4	7	7	6	3	5										CD84;PTAFR;HMOX1;TYROBP	PTAFR;FCGR3;SPI1;SYK;TYROBP;CD84;ITGB2	FCGR3;FGR;TYROBP;SYK;ITGB2;CD84;SPI1	TYROBP;RAC2;SYK;ITGB2;FGR;LYN	SYK;FCGR3;TYROBP	FGR;RAC2;SYK;ITGB2;TYROBP
GOBP_NEGATIVE_REGULATION_OF_DEPHOSPHORYLATION							2.109															3															GNAI2;FKBP1A;NCKAP1L
GOBP_V_D_J_RECOMBINATION										1.696	1.822	1.961													2	2	2													ATM;TCF7	TCF7;ATM	TCF7;ATM
GOBP_APICAL_JUNCTION_ASSEMBLY														1.411	2.849														4	6														ESAM;CLDN5;PECAM1;RAMP2	RAMP2;ESAM;PECAM1;CDH5;CLDN5;MYO1C
GOBP_OSSIFICATION				1.331	1.897	1.919													5	7	6													COL1A1;MMP2;COL1A2;COL6A1;IGFBP5	COL1A1;SFRP1;COL1A2;MMP2;COL6A1;IGFBP5;MGP	IGFBP5;COL1A2;COL6A1;MGP;PTH1R;COL1A1
GOBP_ENDOCARDIAL_CUSHION_FORMATION						1.681															2															TBX2;ENG
GOBP_POSITIVE_REGULATION_OF_PLATELET_ACTIVATION														1.622	1.684														2	2														TLR4;SELP	SELP;TLR4
GOBP_POSITIVE_REGULATION_OF_STRESS_ACTIVATED_PROTEIN_KINASE_SIGNALING_CASCADE									1.465															4															GADD45B;FCGR3;PYCARD;SPI1
GOBP_EXPORT_FROM_CELL							3.464	4.344	4.648	1.596		2.049										15	21	20	12		11										PLEK;PRKCB;IL1RN;PTAFR;ANXA1;TLR2;GNAI2;SLC40A1;CD84;TNFAIP2;NCKAP1L;AXL;RAB31;PPT1;HMOX1	PTAFR;FCGR3;UCP2;SPI1;PLEK;MERTK;FRMD4A;LRRK2;AXL;PPT1;ANXA1;NCKAP1L;RAB31;GNAI2;HCK;CD84;SLC40A1;DAB2;SYK;ITGB2;PRKCB	AXL;FRMD4A;NCKAP1L;DAB2;HCK;GNAI2;FCGR3;SLC40A1;LRRK2;SYK;RAB31;PRKCB;TLR2;PPT1;ITGB2;FGR;UCP2;MERTK;CD84;SPI1	TLR2;CORO1A;RAC2;SYK;ITGB2;RAB31;FGR;ANXA1;TNFAIP2;PLEK;PRKCB;LYN		HCK;RAC2;FGR;SYK;RASGRP1;KIT;CORO1A;ITGB2;TLR2;PRKCB;RAB31
GOBP_RAS_PROTEIN_SIGNAL_TRANSDUCTION													1.504	1.503														6	10														SPRY1;ADGRG1;RHOJ;TIAM1;CDC42EP3;COL3A1	CDH13;RIPOR1;SPRY4;RAPGEF5;CDC42EP3;ADGRG1;TIAM1;DLC1;COL3A1;RASIP1
GOBP_CELL_CELL_JUNCTION_ORGANIZATION														2.233	2.493														9	9														HDAC7;CLDN5;FSCN1;ESAM;PECAM1;GJA5;RAMP2;EFNB2;CAV1	FSCN1;RAMP2;ESAM;GJA4;PECAM1;CDH5;HEG1;CLDN5;MYO1C
GOBP_CEREBRAL_CORTEX_DEVELOPMENT
GOBP_REGULATION_OF_CELL_PROJECTION_ORGANIZATION				1.432	1.483			1.602		1.844	3.233	2.236	1.577	1.671					7	8			12		11	13	10	9	16					FLNA;KLF4;ITM2C;SEMA5A;THY1;CDC42EP3;VIM	VIM;SFRP1;KLF4;SEMA5A;FLNA;THY1;CDC42EP3;ITM2C			VIM;SRGAP2;DAB2;KLF4;FCGR3;CCDC88A;WAS;S100A9;CD44;LRRK2;WASF2;CDC42EP3		CD44;KLF4;SEMA4D;RAC2;CCDC88A;LYN;FLNA;FYN;VIM;EVL;MBP	EVL;KIT;CCDC88A;FLNA;VIM;FCGR3;KLF4;SEMA4D;FYN;MBP;S100A9;CD44;TOX	RAC2;CCDC88A;S100A9;VIM;KIT;KLF4;MBP;EVL;TOX;SEMA4D	PALM;ITGA6;GPM6A;VIM;KLF4;TIAM1;CDC42EP3;ICAM1;DPYSL3	ITGA6;DPYSL3;PALM;FSCN1;CDC42EP3;RELN;KLF4;HECW2;DAB2;EFNB2;TIAM1;VIM;FCGR3;CAV1;GPM6A;SEMA6A
GOBP_NEGATIVE_REGULATION_OF_B_CELL_PROLIFERATION								2.634	1.671	2.854	4.388	1.993											3	2	3	4	2											FCGR3;TYROBP;IFI205	FCGR3;TYROBP	ATM;TYROBP;LYN	ATM;IFI205;FCGR3;TYROBP	TYROBP;ATM
GOBP_POSITIVE_REGULATION_OF_IMMUNOGLOBULIN_PRODUCTION
GOBP_SEQUESTERING_OF_CALCIUM_ION										1.587	1.804	1.99													4	4	4													CCR5;CORO1A;LYN;PTPRC	LCK;PTPRC;CORO1A;CCR5	PTPRC;CCR5;LCK;CORO1A
GOBP_DETECTION_OF_MECHANICAL_STIMULUS_INVOLVED_IN_SENSORY_PERCEPTION										1.352	1.459														2	2														FYN;CXCR4	KIT;FYN
GOBP_METANEPHRIC_GLOMERULUS_DEVELOPMENT													2.962	2.131														3	3														CD34;LAMB2;PDGFB	PDGFB;LAMB2;CD34
GOBP_NEGATIVE_REGULATION_OF_NF_KAPPAB_TRANSCRIPTION_FACTOR_ACTIVITY								1.769	1.984														4	4														PYCARD;SPI1;KLF4;ARRB2	PYCARD;ARRB2;KLF4;SPI1
GOBP_REGULATION_OF_CELLULAR_COMPONENT_SIZE							2.04	2.046	1.922	1.641	1.514	2.235										7	9	8	7	6	7										PLEK;ARPC1B;COTL1;TMSB10;HCLS1;NCKAP1L;CDC42EP3	NCKAP1L;ARPC1B;TMSB10;WAS;PYCARD;HCK;PLEK;COTL1;CDC42EP3	WAS;COTL1;HCLS1;PYCARD;NCKAP1L;TMSB10;ARPC1B;HCK	CORO1A;COTL1;HCLS1;CYFIP2;PLEK;SEMA4D;EVL	EVL;CYFIP2;CORO1A;COTL1;PLEK;SEMA4D	HCK;CYFIP2;COTL1;CORO1A;EVL;HCLS1;SEMA4D
GOBP_PROTEIN_POLYMERIZATION							2.493	3.309	3.755	1.635	1.435	2.777										7	10	10	6	5	7										ARPC1B;COTL1;TMSB10;HCLS1;NCKAP1L;PREX1;CDC42EP3	NCKAP1L;ARPC1B;TMSB10;WAS;PYCARD;PREX1;HCK;AIF1;COTL1;CDC42EP3	WAS;AIF1;COTL1;HCLS1;PYCARD;NCKAP1L;TMSB10;PREX1;ARPC1B;HCK	CORO1A;COTL1;HCLS1;CYFIP2;AIF1;EVL	EVL;CYFIP2;CORO1A;COTL1;AIF1	AIF1;HCK;CYFIP2;COTL1;CORO1A;EVL;HCLS1
GOBP_MESANGIAL_CELL_DIFFERENTIATION													2.321	1.77														2	2														CD34;PDGFB	PDGFB;CD34
GOBP_REGULATION_OF_HEART_CONTRACTION					1.872															5															EDNRB;TBX2;FLNA;TPM1;RGS4
GOBP_GLOMERULAR_EPITHELIAL_CELL_DIFFERENTIATION													1.616	1.863														2	3														LAMB2;BMP4	EDNRB;BMP4;LAMB2
GOBP_REGULATION_OF_CARDIOCYTE_DIFFERENTIATION													2.295	2.284	1.625													3	4	3													BMP4;DLL1;SOX17	MEF2C;EFNB2;BMP4;DLL1	MEF2C;DLL1;SOX17
GOBP_NUCLEOTIDE_BINDING_DOMAIN_LEUCINE_RICH_REPEAT_CONTAINING_RECEPTOR_SIGNALING_PATHWAY										1.545		1.8													2		2													PTPN22;TNFAIP3		TNFAIP3;PTPN22
GOBP_RESPONSE_TO_FLUID_SHEAR_STRESS				1.608	1.492					1.37	1.481	1.6	1.426	3.182	4.528				2	2					2	2	2	2	5	6				MMP2;KLF4	MMP2;KLF4					KLF2;KLF4	KLF2;KLF4	KLF4;KLF2	KLF4;SMAD6	KLF2;MEF2C;MAPK7;KLF4;SMAD6	MEF2C;MAPK7;KLF2;NOS3;SMAD6;KLF4
GOBP_MUSCLE_CELL_DEVELOPMENT					2.046	3.254								2.005	1.359					5	6								8	6					MYH11;TPM1;MYL9;RGS4;ACTN1	ENG;RGS4;ACTN1;MYH11;CSRP1;TPM1								BMP4;SKI;RAMP2;CAV2;TMOD3;PGM5;SELENON;ACTN1	RAMP2;CSRP1;ENG;SELENON;ACTN1;CAV2
GOBP_POSITIVE_REGULATION_OF_MACROPHAGE_DERIVED_FOAM_CELL_DIFFERENTIATION										1.731															2															NFKB1;PRKCH
GOBP_REGULATION_OF_OLIGODENDROCYTE_DIFFERENTIATION							1.349															2															TLR2;CXCR4
GOBP_CELLULAR_RESPONSE_TO_BIOTIC_STIMULUS							1.699	5.293	5.834	3.72	2.196	3.871		1.632	2.258							5	12	12	9	6	8		8	9							PTAFR;TLR2;AXL;VIM;IRF8	PTAFR;VIM;MRC1;FCGR3;PYCARD;SPI1;LY86;HCK;SYK;IRF8;AXL;CD86	FCGR3;LY86;CD55;VIM;MRC1;TLR2;AXL;PYCARD;IRF8;SYK;HCK;SPI1	TLR2;NFKB1;TNFAIP3;SYK;KLRK1;LYN;CCR5;PTPN22;VIM	SYK;VIM;FCGR3;PTPN22;CCR5;KLRK1	HCK;PTPN22;TNFAIP3;VIM;SYK;TLR2;KLRK1;CCR5		EDNRB;MRC1;MEF2C;EFNB2;TLR4;VIM;FCGR3;PLSCR4	CD55;MEF2C;PLSCR4;VIM;TLR4;SERPINE1;NOS3;FCGR3;MRC1
GOBP_NEGATIVE_REGULATION_OF_LYMPHOCYTE_MEDIATED_IMMUNITY								1.648	2.7						1.331								3	4						3								ARRB2;FCGR3;NCKAP1L	ARRB2;NCKAP1L;FCGR3;CD55						CD55;FCGR3;CLEC4G
GOBP_VASCULAR_ASSOCIATED_SMOOTH_MUSCLE_CELL_DIFFERENTIATION															1.604															3															ENG;RAMP2;PDGFB
GOBP_POSITIVE_REGULATION_OF_CYTOKINE_PRODUCTION_INVOLVED_IN_IMMUNE_RESPONSE											1.764	1.929														3	3														KIT;SASH3;LAPTM5	KIT;LAPTM5;SASH3
GOBP_RESPONSE_TO_HYPEROXIA				1.912	1.771														2	2														COL1A1;MMP2	MMP2;COL1A1
GOBP_INTRINSIC_APOPTOTIC_SIGNALING_PATHWAY_IN_RESPONSE_TO_DNA_DAMAGE											1.392															3															BCL2;CD44;ATM
GOBP_REGULATION_OF_GRANULOCYTE_DIFFERENTIATION							1.952		1.791													2		2													HCLS1;C1QC		HCLS1;C1QC
GOBP_RESPONSE_TO_WOUNDING				4.629	3.785	3.639	2.049	3.003	2.136	4.361	3.39	2.747	2.857	3.419	3.963				12	12	10	9	14	11	15	12	10	11	19	19				FBLN1;COL1A1;MMP2;FLNA;ACTA2;KLF4;THBS1;TPM1;COL5A1;CSRP1;COL3A1;PRKG1	COL1A1;PRKG1;KLF4;FBLN1;FLNA;MMP2;TPM1;MYL9;ACTA2;COL3A1;COL5A1;ACTN1	MCAM;C1QTNF1;ACTN1;SERPINE1;COL5A1;KLF4;CSRP1;COL1A1;TPM1;FBLN1	PLEK;THBS1;ANXA1;RAP2B;HMOX1;AXL;TYROBP;CXCR4;KLF4	ANXA1;RAP2B;KLF4;WAS;FCER1G;TYROBP;AIF1;PLEK;CD44;SYK;MERTK;AXL;SLC11A1;S100A8	WAS;SLC11A1;S100A8;AIF1;RAP2B;TYROBP;FCER1G;AXL;SYK;MERTK;KLF4	CD44;FCER1G;SLC11A1;TYROBP;TNFAIP3;SYK;LYN;ANXA1;CXCR4;PLEK;AIF1;FLNA;KLF4;PABPC4;BCL2	FLNA;SYK;PLEK;FCER1G;LCK;KLF4;TYROBP;PRKCQ;S100A8;AIF1;CD44;BCL2	AIF1;SLC11A1;PRKCQ;TNFAIP3;SYK;KLF4;TYROBP;LCK;S100A8;FCER1G	VASH1;KLF4;CSRP1;VWF;DPYSL3;LAMB2;ACVRL1;ANXA1;CD34;COL3A1;PDGFB	ACVRL1;CD34;PDGFB;DPYSL3;RIPOR1;KLF4;ELK3;ACTN1;KDR;SELP;TFPI;PRCP;MMRN1;PAPSS2;CAV1;LAMB2;TLR4;COL3A1;VWF	VWF;ACVRL1;C1QTNF1;RIPOR1;COL3A1;PDGFB;CSRP1;SELP;PRCP;ITGA5;DPYSL3;SERPINE1;NOS3;MCAM;KDR;ACTN1;TLR4;TFPI;KLF4
GOBP_HEART_TRABECULA_MORPHOGENESIS						1.681							1.441	1.567	2.487						2							2	3	4						ADAMTS1;ENG							FKBP1A;ADGRG6	ADGRG6;TGFBR3;TEK	ENG;TGFBR3;HEG1;ADAMTS1
GOBP_NEUTROPHIL_HOMEOSTASIS							1.952	2.852	1.791													2	3	2													AXL;ANXA1	ANXA1;AXL;MERTK	AXL;MERTK
GOBP_REGULATION_OF_AUTOPHAGY										1.314															6															SESN1;PIP4K2A;ATM;ATP6V1B2;PTPN22;BCL2
GOBP_LEUKOCYTE_APOPTOTIC_PROCESS							1.401			1.844		1.519										3			4		3										AXL;HCLS1;ANXA1			HCLS1;CCR5;LYN;ANXA1		CCR5;HCLS1;PRKCQ
GOBP_REGULATION_OF_TRANSMEMBRANE_RECEPTOR_PROTEIN_SERINE_THREONINE_KINASE_SIGNALING_PATHWAY				1.848	1.608								1.911	2.57	1.947				5	5								6	11	9				FBN1;LTBP4;THBS1;FSTL1;ITGA8	FSTL1;SFRP1;LTBP4;ITGA8;FBN1								SPRY1;BMP4;LTBP4;SMAD6;ACVRL1;FKBP1A	ACVRL1;BMP4;SKI;TGFBR3;DAB2;CAV2;ZEB2;KDR;LTBP4;CAV1;SMAD6	DAB2;ENG;ZEB2;TGFBR3;CAV2;CDH5;SMAD6;ACVRL1;KDR
GOBP_OSTEOBLAST_DIFFERENTIATION					1.305	1.6							1.615							4	4							5							COL1A1;IGFBP5;SFRP1;COL6A1	IGFBP5;COL6A1;COL1A1;PTH1R							BMP4;CEBPD;GJA1;HDAC7;SMAD6
GOBP_CHEMICAL_HOMEOSTASIS_WITHIN_A_TISSUE															1.331															2															KDR;ADGRF5
GOBP_NEGATIVE_REGULATION_OF_REACTIVE_OXYGEN_SPECIES_METABOLIC_PROCESS											1.344															2															BCL2;FYN
GOBP_MICROGLIAL_CELL_ACTIVATION							3.066	4.796	6.31	5.188	3.162	5.907										4	6	7	6	4	6										TLR2;IFNGR1;TYROBP;C1QA	IFNGR1;C1QA;TYROBP;AIF1;LRRK2;ITGB2	AIF1;TLR2;TYROBP;IFNGR1;LRRK2;C1QA;ITGB2	TLR2;PTPRC;TYROBP;ATM;ITGB2;AIF1	TYROBP;PTPRC;ATM;AIF1	AIF1;ATM;ITGB2;TYROBP;TLR2;PTPRC
GOBP_POSITIVE_REGULATION_OF_NEURON_APOPTOTIC_PROCESS												1.321															2															TYROBP;ATM
GOBP_POSITIVE_REGULATION_OF_PROTEIN_KINASE_A_SIGNALING															1.572															2															AKAP12;TCIM
GOBP_ANATOMICAL_STRUCTURE_FORMATION_INVOLVED_IN_MORPHOGENESIS				6.399	4.512	8.237	3.442	1.661	1.335	2.821		1.856	10.847	16.721	18.78				20	19	21	18	18	15	19		13	30	55	55				COL6A1;NOTCH3;THY1;ADAMTS1;COL5A1;FLNA;SPARC;THBS1;TPM1;COL4A1;THBS2;COL1A1;MMP2;KLF4;SEMA5A;CSRP1;LAMB1;COL4A2;CCBE1;ITGA8	SFRP1;FLNA;MYH11;NOTCH3;ITGA8;MMP2;THY1;MYL9;ACTN1;COL1A1;SPARC;TPM1;COL6A1;COL5A1;LAMB1;KLF4;TBX2;SEMA5A;CCBE1	ENG;COL6A1;MYH11;ITGA8;SERPINE1;LAMB1;CCBE1;KLF4;SPARC;THY1;ACTN1;THBS2;AGTR1A;TBX2;TPM1;MCAM;NOTCH3;COL5A1;ADAMTS1;CSRP1;COL1A1	PRKCB;CTSH;THBS1;CYBB;KLHL6;PKM;ANXA1;PLEKHO1;TLR2;SLC40A1;KLF4;TNFAIP2;HMOX1;TYROBP;TGFBI;FKBP1A;VSTM4;CXCR4	ANXA1;SLC40A1;VSTM4;KDM6B;KLF4;MYH11;PKM;PLEKHO1;CYBB;KLHL6;EPB41L3;SYK;TYROBP;TGFBI;ITGB2;CTSH;WASF2;PRKCB	KDM6B;CYBB;PRKCB;KLHL6;TLR2;SLC40A1;EPB41L3;TYROBP;VSTM4;PKM;SYK;KLF4;ITGB2;MYH11;TGFBI	TLR2;ETS1;CYBB;CXCR4;TYROBP;TNFAIP3;TGFBI;BTG1;KLF2;ANXA1;FLNA;SYK;ATM;TNFAIP2;ITGB2;ADGRG1;CD53;PRKCB;KLF4		TGFBI;ATM;TNFAIP3;ADGRG1;SYK;ITGB2;CD53;KLF4;CYBB;TYROBP;TLR2;PRKCB;KLF2	COL4A2;ADGRG1;RHOJ;GJA1;KLF4;ADAMTS9;SPARC;ACVRL1;CD34;ADGRG6;ANXA2;PTPN14;EHD2;TM4SF1;FKBP1A;ANGPT2;VASH1;CSRP1;HDAC7;COL8A1;APOLD1;TIE1;SOX17;PTGIS;COL4A1;SPRY1;BMP4;ADAM15;DLL1;ANXA1	TAL1;ACVRL1;ADAM15;MMRN2;MEF2C;TM4SF1;TGFBR3;ACKR3;COL8A1;EFNB2;TMOD3;ANXA2;DLC1;PGM5;RASIP1;DLL1;PTPN14;BMP4;ADGRG6;EGFL7;RELN;KLF4;GJA5;ELK3;LUZP1;CLEC14A;KDR;EPHB4;ADAMTS9;STAB2;CDH13;NPR1;CALCRL;DUSP5;STAB1;PRCP;SKI;ADGRG1;RAMP2;TIE1;PTPRM;SPARC;CAV1;APOLD1;SEMA6A;KLF2;KDM6B;CLDN5;PTGIS;MAPK7;EHD2;TEK;ACTN1;HDAC7;CD34	CALCRL;ECM1;PLXND1;APOLD1;HERC1;PTGIS;RASIP1;CLDN5;ADGRG1;ADAM15;ACVRL1;ANXA2;CLEC14A;RELN;CEMIP2;MEF2C;STAB1;MAPK7;SPARC;CDH13;SEMA6A;CSRP1;ROBO4;DLL1;SOX7;PTPRM;PRCP;AQP1;FLT4;ITGA5;TM4SF1;RAMP2;ETS2;EGFL7;ENG;TGFBR3;SERPINE1;NOS3;FLT1;MCAM;JAM2;ADAMTS1;KDR;TAL1;EPHB4;SOX17;ACTN1;KDM6B;KLF2;TIE1;PTPRB;CDH5;STAB2;MMRN2;KLF4
GOBP_REGULATION_OF_GTPASE_ACTIVITY					1.313			2.115	1.992		1.557	2.288								5			9	8		6	7								SFRP1;THY1;RGS16;RGS4;PRKG1			FGD2;RGS10;ARRB2;LIMS1;PYCARD;PREX1;RGL1;LRRK2;SRGAP2	SRGAP2;RGL1;PYCARD;ARRB2;LRRK2;PREX1;RGS10;FGD2		RASGRP1;PBXIP1;ARHGAP25;SEMA4D;ARHGAP9;KLRK1	ARHGAP25;ARHGAP9;PBXIP1;ARHGAP45;RASGRP1;KLRK1;SEMA4D
GOBP_BONE_DEVELOPMENT										1.446	2.25	1.909	1.64	2.568	1.468										5	6	5	5	10	7										RPL13;PTPRC;TYROBP;PIP4K2A;SEMA4D	KIT;SEMA4D;RPL13;PTPRC;PIP4K2A;TYROBP	PIP4K2A;KIT;TYROBP;PTPRC;SEMA4D	SERPINH1;BMP4;ANXA2;GJA1;COL3A1	TAL1;KDR;BMP4;MEF2C;SERPINH1;CHSY1;SKI;ANXA2;PAPSS2;COL3A1	MEF2C;TAL1;ENG;CHSY1;ANXA2;COL3A1;KDR
GOBP_PYRIDINE_NUCLEOTIDE_METABOLIC_PROCESS													1.426															2															PTGIS;NAMPT
GOBP_NEPHRON_EPITHELIUM_DEVELOPMENT													1.855	2.432														4	7														BMP4;CD34;LAMB2;DLL1	EDNRB;BMP4;MEF2C;LAMB2;PECAM1;CD34;DLL1
GOBP_CYCLOOXYGENASE_PATHWAY														1.691	1.761														2	2														PTGS1;PTGIS	PTGIS;PTGS1
GOBP_FIBROBLAST_PROLIFERATION
GOBP_OVULATION				1.787															2															ADAMTS1;MMP2
GOBP_BRANCH_ELONGATION_OF_AN_EPITHELIUM													1.731															2															SPRY1;BMP4
GOBP_CELLULAR_RESPONSE_TO_DSRNA			1.517															2															RIOK3;MAVS
GOBP_ACTIN_FILAMENT_BASED_MOVEMENT				1.416															3															FLNA;ACTA2;TPM1
GOBP_REGULATION_OF_PROTEIN_KINASE_ACTIVITY								1.431	3.012	2.373	1.319	2.854											11	14	12	8	11											NCKAP1L;FGD2;RAP2B;DAB2;CCDC88A;CSF1R;PYCARD;SYK;LRRK2;SLC11A1;CD86	SLC11A1;RAP2B;FGR;CCDC88A;GADD45B;CSF1R;PYCARD;DAB2;NCKAP1L;LRRK2;SYK;PILRB1;IL6RA;FGD2	PTPN22;CSF1R;PTPRC;SLC11A1;TNFAIP3;SYK;CCDC88A;NCF1;FGR;LYN;GADD45B;CCND2	CSF1R;KIT;CCDC88A;RASGRP1;SYK;CCND2;PTPN22;PTPRC	FGR;SLC11A1;CCDC88A;GADD45B;TNFAIP3;PTPN22;SYK;RASGRP1;KIT;CSF1R;PTPRC
GOBP_POSITIVE_REGULATION_OF_SMOOTH_MUSCLE_CELL_PROLIFERATION				3.598	1.585	1.839	3.013	1.734	1.934				1.48	1.739	2.522				5	3	3	5	4	4				3	5	6				MMP2;IGFBP5;NOTCH3;THBS1;ADAMTS1	MMP2;IGFBP5;NOTCH3	IGFBP5;NOTCH3;ADAMTS1	THBS1;PTAFR;GNAI2;HMOX1;CYBA	PTAFR;AIF1;GNAI2;CYBA	IL6RA;GNAI2;CYBA;AIF1				GJA1;BMP4;PDGFB	CDH13;CALCRL;BMP4;TLR4;PDGFB	GNAI2;CDH13;PDGFB;CALCRL;TLR4;ADAMTS1
GOBP_PRODUCTION_OF_MOLECULAR_MEDIATOR_OF_IMMUNE_RESPONSE											2.835	1.889														7	5														KIT;SAMHD1;FCGR3;PTPN22;PTPRC;LAPTM5;SASH3	PTPN22;KIT;SASH3;LAPTM5;PTPRC
GOBP_ENDOTHELIAL_CELL_MIGRATION				2.598	1.674		1.615						5.588	6.579	8.115				6	5		5						11	17	18				CCBE1;SPARC;KLF4;THBS1;SEMA5A;FSTL1	FSTL1;KLF4;SEMA5A;SPARC;CCBE1		HMOX1;ANXA1;THBS1;KLF4;VSTM4						ANGPT2;VASH1;BMP4;RHOJ;KLF4;ADAMTS9;SPARC;HDAC7;ACVRL1;ANXA1;PDGFB	CDH13;ACVRL1;BMP4;KDR;EPHB4;MMRN2;MEF2C;PRCP;KLF4;EFNB2;PTPRM;TEK;CLEC14A;SPARC;PDGFB;ADAMTS9;HDAC7	FLT4;MEF2C;SPARC;PDGFB;CDH13;EPHB4;LGMN;PLXND1;CDH5;NOS3;CLEC14A;PTPRM;ACVRL1;PXN;PRCP;MMRN2;KLF4;KDR
GOBP_DORSAL_AORTA_MORPHOGENESIS															1.761															2															ACVRL1;ENG
GOBP_CELLULAR_COMPONENT_MAINTENANCE											1.764															3															CSF1R;FCGR3;FYN
GOBP_NEGATIVE_REGULATION_OF_INTERLEUKIN_8_PRODUCTION							1.689	1.386		2.588	1.697	1.83	1.597									2	2		3	2	2	2									KLF4;ANXA1	ANXA1;KLF4		PTPN22;KLF4;ANXA1	PTPN22;KLF4	KLF4;PTPN22	ANXA1;KLF4
GOBP_POSITIVE_REGULATION_OF_NITRIC_OXIDE_SYNTHASE_BIOSYNTHETIC_PROCESS							1.872	1.585	2.867				1.767	4.392	4.636							2	2	3				2	5	5							TLR2;NAMPT	LRRK2;NAMPT	NAMPT;TLR2;LRRK2				NAMPT;IL33	AKAP12;NAMPT;TLR4;KDR;IL33	NAMPT;AKAP12;TLR4;IL33;KDR
GOBP_DENDRITIC_CELL_DIFFERENTIATION							1.307	2.612	2.828													2	4	4													AXL;IRF8	SPI1;AXL;FCGR3;IRF8	AXL;FCGR3;IRF8;SPI1
GOBP_LYMPH_NODE_DEVELOPMENT											1.856	1.993														2	2														LTB;TOX	LTB;TOX
GOBP_REGULATION_OF_PROTEIN_TYROSINE_KINASE_ACTIVITY										1.352			1.456												3			3												NCF1;CSF1R;PTPRC			NEDD9;APP;PDGFB
GOBP_NEGATIVE_REGULATION_OF_LYASE_ACTIVITY								1.309	1.427														2	2														P2RY13;GNAI2	P2RY13;GNAI2
GOBP_CIRCULATORY_SYSTEM_DEVELOPMENT				7.311	5.692	9.022	2.685	1.723	1.389	1.895			10.935	18.322	21.404				21	21	22	16	18	15	16			30	57	58				NOTCH3;THY1;ADAMTS1;COL5A1;FLNA;SPARC;ACTA2;THBS1;TPM1;COL3A1;COL4A1;THBS2;COL1A1;MMP2;COL1A2;KLF4;SEMA5A;ANTXR1;COL4A2;CCBE1;FBN1	ANTXR1;SFRP1;FLNA;MYH11;NOTCH3;MMP2;THY1;FBN1;COL3A1;COL1A1;SPARC;COL1A2;TPM1;ACTA2;RGS4;COL5A1;KLF4;TBX2;SEMA5A;CCBE1;CPE	FBN1;ENG;MYH11;ADGRF5;GJA4;COL1A2;SERPINE1;CCBE1;KLF4;ANTXR1;SPARC;THY1;THBS2;AGTR1A;TBX2;TPM1;MCAM;RGS4;NOTCH3;COL5A1;ADAMTS1;COL1A1	PRKCB;CTSH;DUSP6;BASP1;CYBB;THBS1;PKM;ANXA1;KLF4;VCAM1;TNFAIP2;HMOX1;TGFBI;FKBP1A;VSTM4;CXCR4	ANXA1;BASP1;VSTM4;KDM6B;KLF4;MYH11;PKM;JARID2;CYBB;ARRB2;DUSP6;SPI1;SYK;TGFBI;VCAM1;CTSH;WASF2;PRKCB	JARID2;KDM6B;VCAM1;CYBB;PRKCB;BASP1;VSTM4;ARRB2;PKM;SYK;KLF4;IL6RA;MYH11;TGFBI;SPI1	ETS1;CYBB;TNFAIP3;TGFBI;BTG1;ATM;KLF2;SYK;CXCR4;ADGRG1;TNFAIP2;ANXA1;PRKCB;FLNA;KLF4;JARID2			COL4A2;ADGRG1;RHOJ;GJA1;KLF4;ADAMTS9;SPARC;ACVRL1;COL3A1;CD34;ADGRG6;ANXA2;PTPN14;FKBP1A;ANGPT2;VASH1;HDAC7;COL8A1;APOLD1;TIE1;SOX17;PTGIS;COL4A1;SPRY1;BMP4;ADAM15;DLL1;SMAD6;ANXA1;PDGFB	TAL1;ACVRL1;ADAM15;MMRN2;MEF2C;EPOR;TGFBR3;ACKR3;COL8A1;EFNB2;VCAM1;ANXA2;DLC1;PDGFB;RASIP1;DLL1;PTPN14;ADGRF5;BMP4;CCM2L;ADGRG6;EGFL7;KLF4;GJA5;ELK3;LUZP1;CLEC14A;CPE;RPS6KA2;KDR;EPHB4;ADAMTS9;STAB2;SMAD6;CDH13;NPR1;CALCRL;STAB1;PRCP;ADGRG1;PECAM1;RAMP2;TIE1;PTPRM;SPARC;CAV1;APOLD1;SEMA6A;KLF2;KDM6B;CLDN5;PTGIS;MAPK7;TEK;COL3A1;HDAC7;CD34	CALCRL;ECM1;PLXND1;APOLD1;PTGIS;RASIP1;HEG1;CLDN5;ADAM15;SMAD6;CLEC14A;ANXA2;EPOR;ADGRG1;ACVRL1;CEMIP2;MEF2C;STAB1;MAPK7;SPARC;COL3A1;CDH13;SEMA6A;PDGFB;ROBO4;DLL1;GJA4;PTPRM;PRCP;AQP1;FLT4;ITGA5;RAMP2;CCM2L;EGFL7;ENG;RPS6KA2;TGFBR3;SERPINE1;NOS3;FLT1;MCAM;VCAM1;ADGRF5;ADAMTS1;KDR;TAL1;EPHB4;SOX17;PECAM1;KDM6B;KLF2;TIE1;PTPRB;CDH5;STAB2;MMRN2;KLF4
GOBP_EPIDERMAL_CELL_DIFFERENTIATION													1.438															4															ANXA1;BMP4;KLF4;DLL1
GOBP_POSITIVE_REGULATION_OF_PRODUCTION_OF_MOLECULAR_MEDIATOR_OF_IMMUNE_RESPONSE										1.643	2.54	2.814													4	5	5													LAPTM5;PTPN22;SASH3;PTPRC	KIT;PTPN22;PTPRC;LAPTM5;SASH3	PTPN22;KIT;SASH3;LAPTM5;PTPRC
GOBP_ACTIVATION_OF_CYSTEINE_TYPE_ENDOPEPTIDASE_ACTIVITY_INVOLVED_IN_APOPTOTIC_PROCESS								2.79	2.178		2.497	2.736											5	4		4	4											LAPTM5;PYCARD;S100A9;CTSH;S100A8	LAPTM5;S100A8;S100A9;PYCARD		LCK;S100A8;LAPTM5;S100A9	S100A9;LAPTM5;S100A8;LCK
GOBP_LIPID_IMPORT_INTO_CELL	1.609															2															SLC27A2;ACSL1
GOBP_POSITIVE_REGULATION_OF_PROTEOLYSIS								2.472	2.355		2.427	2.193											10	9		8	7											VSIR;LAPTM5;LGMN;DAB2;PYCARD;SYK;S100A9;LRRK2;CTSH;S100A8	S100A8;S100A9;LGMN;PYCARD;DAB2;LRRK2;SYK;LAPTM5;VSIR		CYFIP2;SYK;LCK;FYN;MBP;S100A8;LAPTM5;S100A9	S100A9;CYFIP2;SYK;MBP;LAPTM5;S100A8;LCK
GOBP_ALPHA_BETA_T_CELL_DIFFERENTIATION							1.365	2.108		2.459	2.732	1.476										3	5		5	5	3										CD83;ANXA1;NCKAP1L	ANXA1;NCKAP1L;CD83;SYK;CD86		SASH3;SYK;ANXA1;CD83;BCL2	CD83;SYK;TOX;BCL2;SASH3	SYK;SASH3;TOX
GOBP_DEFENSE_RESPONSE_TO_TUMOR_CELL					2.171		2.192	3.309	3.473	2.13	2.248	2.399		1.563						2		2	3	3	2	2	2		2						RBMS3;KLF4		LAPTM5;KLF4	KLF4;LAPTM5;SPI1	LAPTM5;KLF4;SPI1	LAPTM5;KLF4	KLF4;LAPTM5	KLF4;LAPTM5		RBMS3;KLF4
GOBP_TRANSMEMBRANE_TRANSPORT							1.338															14															PRKCB;OAZ1;TTYH3;CYBB;PTAFR;SLC40A1;S100A6;THBS1;CYBA;SLC31A2;FKBP1A;PLP2;SLC43A2;ATP6V1B2
GOBP_DNA_BIOSYNTHETIC_PROCESS
GOBP_POSITIVE_REGULATION_OF_GAMMA_DELTA_T_CELL_ACTIVATION								2.102	2.228	2.293	2.399	2.575											2	2	2	2	2											SYK;NCKAP1L	NCKAP1L;SYK	SYK;PTPRC	SYK;PTPRC	SYK;PTPRC
GOBP_ANIMAL_ORGAN_MORPHOGENESIS				5.077	5.692	5.155							3.952	5.731	4.014				17	20	16							18	34	28				COL1A1;MMP2;LAMC1;FBN1;FLNA;ACTA2;GPC6;COL1A2;IGFBP5;THY1;TPM1;ITGA8;COL5A1;ADAMTS1;COL3A1;LAMB1;FHL1	SFRP1;FLNA;ITGA8;MMP2;THY1;FBN1;COL3A1;IGFBP5;MGP;COL1A1;COL1A2;FHL1;TPM1;ACTA2;COL5A1;LAMC1;LAMB1;TBX2;GPC6;CPE	IGFBP5;COL1A2;LAMC1;FBN1;THY1;ENG;ITGA8;SERPINE1;COL5A1;ADAMTS1;TBX2;LAMB1;GPC6;MGP;COL1A1;TPM1							SERPINH1;SPRY1;ITGA6;ADGRG6;BMP4;GJA1;ADAM15;ACVRL1;DLL1;TIAM1;PRICKLE2;LAMB2;SMAD6;COL3A1;CD34;COL8A1;FKBP1A;SOX17	ACVRL1;ITGA6;ADAM15;MEF2C;TGFBR3;COL8A1;MGP;EFNB2;TIAM1;FHL1;DLC1;DLL1;BMP4;CCM2L;CHSY1;ADGRG6;GJA5;MEIS2;CPE;PCGF2;KDR;EPHB4;SMAD6;SKI;DAB2;PTPRM;CAV1;SEMA6A;CLDN5;SERPINH1;LAMB2;TEK;COL3A1;CD34	PLXND1;HEG1;CLDN5;ADAM15;SMAD6;ITGA6;ACVRL1;MEF2C;SEMA6A;CHSY1;DLL1;PTPRM;PRICKLE2;AQP1;WWTR1;CCM2L;ENG;TGFBR3;SERPINE1;NOS3;MGP;ADAMTS1;KDR;DAB2;EPHB4;SOX17;SHANK3;COL3A1
GOBP_ION_TRANSPORT							2.093			1.563												17			18												PRKCB;TTYH3;CYBB;PTAFR;ANXA1;SGK1;GNAI2;SLC40A1;CD84;S100A6;FKBP1A;CYBA;SLC31A2;CXCR4;PLP2;SLC43A2;ATP6V1B2			PTPRC;SLC11A1;TMC8;CYBB;CORO1A;SYK;SLC7A7;FLNA;LYN;SLC38A1;CXCR4;ANXA1;PRKCB;CCR5;SGK1;ATP6V1B2;BCL2;FYN
GOBP_HYALURONAN_METABOLIC_PROCESS										1.446															2															NFKB1;CD44
GOBP_CELL_FATE_COMMITMENT															1.523															8															MEF2C;TAL1;ETS2;SOX17;KDM6B;DLL1;KLF4;KDR
GOBP_REGULATION_OF_ORGANIC_ACID_TRANSPORT			1.458															3															CYP4A32;ACSL1;ABAT
GOBP_REGULATION_OF_ENDOTHELIAL_CELL_MIGRATION				2.268	1.448		1.365						6.483	4.842	4.549				5	4		4						11	13	12				CCBE1;SPARC;KLF4;THBS1;SEMA5A	SEMA5A;SPARC;KLF4;CCBE1		KLF4;HMOX1;ANXA1;THBS1						ANGPT2;VASH1;BMP4;RHOJ;KLF4;ADAMTS9;SPARC;HDAC7;ACVRL1;ANXA1;PDGFB	ACVRL1;KDR;BMP4;MMRN2;MEF2C;PRCP;KLF4;PTPRM;TEK;SPARC;PDGFB;ADAMTS9;HDAC7	FLT4;MEF2C;SPARC;PDGFB;LGMN;NOS3;PTPRM;ACVRL1;PRCP;MMRN2;KLF4;KDR
GOBP_NEGATIVE_REGULATION_OF_PHOSPHORUS_METABOLIC_PROCESS						1.401	1.31			1.709		1.425			1.342						5	6			8		6			10						THY1;ENG;CTDSPL;IGFBP3;FBLN1	PLEK;DUSP6;GNAI2;GADD45B;FKBP1A;NCKAP1L			PTPRC;TNFAIP3;PIP4K2A;LYN;GADD45B;PLEK;PTPN22;SEMA4D		PTPN22;GADD45B;TNFAIP3;PIP4K2A;PTPRC;SEMA4D			WWTR1;GNAI2;PDGFB;ENG;PTPRB;RASIP1;HEG1;IGFBP3;SMAD6;CNKSR3
GOBP_POSITIVE_REGULATION_OF_CELL_PROJECTION_ORGANIZATION											1.992	1.748	1.525													7	6	6													KIT;CCDC88A;FLNA;SEMA4D;FYN;S100A9;TOX	RAC2;CCDC88A;S100A9;KIT;TOX;SEMA4D	PALM;ITGA6;GPM6A;TIAM1;CDC42EP3;DPYSL3
GOBP_RESPONSE_TO_ALDOSTERONE							3.789	2.102	3.76	3.78		2.575										3	2	3	3		2										CYBA;CYBB;SGK1	CYBB;CYBA	CYBB;SGK1;CYBA	RPL27;CYBB;SGK1		SGK1;CYBB
GOBP_TRANSCRIPTION_BY_RNA_POLYMERASE_I				1.386															2															FLNA;CAVIN1
GOBP_REGULATION_OF_T_HELPER_1_TYPE_IMMUNE_RESPONSE										1.427															2															SLC11A1;ANXA1
GOBP_POSITIVE_REGULATION_OF_MYELOID_LEUKOCYTE_MEDIATED_IMMUNITY							1.775	3.733	2.691	1.664		1.929										2	4	3	2		2										TYROBP;PTAFR	PTAFR;SPI1;TYROBP;ITGB2	ITGB2;TYROBP;SPI1	TYROBP;ITGB2		TYROBP;ITGB2
GOBP_NEGATIVE_REGULATION_OF_MYELOID_LEUKOCYTE_MEDIATED_IMMUNITY							2.144	3.193	3.365													2	3	3													CD84;HMOX1	CD84;SPI1;FCGR3	FCGR3;CD84;SPI1
GOBP_REGULATION_OF_MONONUCLEAR_CELL_MIGRATION								2.108	2.355	2.459	1.997	2.194											5	5	5	4	4											LGMN;CSF1R;PYCARD;SPI1;AIF1	AIF1;LGMN;CSF1R;PYCARD;SPI1	CSF1R;STK10;KLRK1;LYN;AIF1	CSF1R;STK10;KLRK1;AIF1	KLRK1;STK10;AIF1;CSF1R
GOBP_POSITIVE_REGULATION_OF_ADAPTIVE_IMMUNE_RESPONSE											1.377	2.246														3	4														PRKCQ;PTPRC;SASH3	PTPRC;SASH3;SLC11A1;PRKCQ
GOBP_ACTIN_CYTOSKELETON_REORGANIZATION							1.351	2.081	1.66	3.221	2.704	2.966										3	5	4	6	5	5										PLEK;HCLS1;ANXA1	ANXA1;CSF1R;PARVG;HCK;PLEK	HCK;PARVG;HCLS1;CSF1R	ARHGDIB;CSF1R;HCLS1;ANXA1;PLEK;FLNA	CSF1R;KIT;FLNA;PLEK;ARHGDIB	HCK;ARHGDIB;KIT;CSF1R;HCLS1
GOBP_T_CELL_HOMEOSTASIS											1.389															2															CORO1A;BCL2
GOBP_MONONUCLEAR_CELL_DIFFERENTIATION							3.17	6.026	5.37	4.987	8.321	6.415										10	17	15	14	17	14										CD83;FGL2;ANXA1;VCAM1;NFAM1;NCKAP1L;AXL;IRF8;PREX1;VSIR	ANXA1;VSIR;NCKAP1L;NFAM1;CD83;FCGR3;FGL2;CSF1R;SPI1;FCER1G;PREX1;SYK;MERTK;VCAM1;IRF8;AXL;CD86	FCGR3;VCAM1;NFAM1;CSF1R;FCER1G;AXL;NCKAP1L;IRF8;SYK;FGL2;MERTK;IL6RA;PREX1;VSIR;SPI1	CSF1R;FCER1G;PTPRC;TCF7;SASH3;SYK;ATM;FGL2;IKZF1;LYN;ANXA1;CD83;PTPN22;BCL2	CSF1R;KIT;IKZF1;RASGRP1;CD83;SYK;TCF7;LCK;FCER1G;FCGR3;PTPN22;PTPRC;ATM;BCL2;TOX;FGL2;SASH3	PTPN22;ATM;IKZF1;SYK;RASGRP1;KIT;CSF1R;FGL2;SASH3;PTPRC;LCK;TCF7;FCER1G;TOX
GOBP_CELLULAR_RESPONSE_TO_ORGANIC_CYCLIC_COMPOUND									1.349															9															P2RY13;AIF1;ARRB2;DAB2;MSR1;LRRK2;FOLR2;CYBA;SGK1
GOBP_CELLULAR_RESPONSE_TO_CHEMICAL_STRESS	1.602				1.367					2.246						7				5					8						VNN1;ERRFI1;FABP1;CAT;DNAJA1;MGST1;SOD1				FOS;FBLN5;MMP2;TPM1;SOD3					TNFAIP3;ATM;KLF2;NCF1;ANXA1;FYN;AIF1;BCL2
GOBP_LYMPHOID_PROGENITOR_CELL_DIFFERENTIATION											1.726															2															KIT;BCL2
GOBP_CELL_PROLIFERATION_INVOLVED_IN_KIDNEY_DEVELOPMENT													1.616															2															BMP4;PDGFB
GOBP_NEGATIVE_REGULATION_OF_NEUTROPHIL_ACTIVATION								2.32	2.449														2	2														SPI1;FCGR3	FCGR3;SPI1
GOBP_NEUROTRANSMITTER_GATED_ION_CHANNEL_CLUSTERING															1.427															2															RELN;SHANK3
GOBP_REGULATION_OF_DEFENSE_RESPONSE_TO_VIRUS_BY_HOST												1.501															2															TNFAIP3;PTPN22
GOBP_NEGATIVE_REGULATION_OF_TOR_SIGNALING											1.314															2															SESN1;ATM
GOBP_POSITIVE_REGULATION_OF_TYPE_I_INTERFERON_PRODUCTION										1.781		2.124													3		3													PTPN22;TLR2;SYK		TLR2;SYK;PTPN22
GOBP_RNA_CATABOLIC_PROCESS										1.573															6															BTG2;SLC11A1;ATM;VIM;TENT5C;PABPC4
GOBP_CORTICOSTEROID_HORMONE_SECRETION						2.006									1.331						2									2						C1QTNF1;AGTR1A									DAB2;C1QTNF1
GOBP_REGULATION_OF_ANIMAL_ORGAN_MORPHOGENESIS													2.315															5															SPRY1;BMP4;TIAM1;PRICKLE2;CD34
GOBP_KIDNEY_EPITHELIUM_DEVELOPMENT													2.902	3.119														6	9														SPRY1;BMP4;DLL1;LAMB2;SMAD6;CD34	EDNRB;BMP4;MEF2C;LAMB2;PECAM1;EFNB2;CD34;DLL1;SMAD6
GOBP_POSITIVE_REGULATION_OF_ARP2_3_COMPLEX_MEDIATED_ACTIN_NUCLEATION								1.942															2															WASF2;WAS
GOBP_POSITIVE_REGULATION_OF_ALPHA_BETA_T_CELL_DIFFERENTIATION							2.06	3.439		2.769	2.063	1.346										3	5		4	3	2										CD83;ANXA1;NCKAP1L	ANXA1;NCKAP1L;CD83;SYK;CD86		ANXA1;SASH3;SYK;CD83	SYK;CD83;SASH3	SYK;SASH3
GOBP_REGULATION_OF_ANION_TRANSMEMBRANE_TRANSPORT							1.634	1.332														2	2														PTAFR;SLC43A2	PTAFR;SLC43A2
GOBP_TETRAPYRROLE_CATABOLIC_PROCESS	1.835															2															SLCO1B2;AMBP
GOBP_REGULATION_OF_LONG_TERM_SYNAPTIC_POTENTIATION															1.391															3															LGMN;RELN;SHANK3
GOBP_REGULATION_OF_VASCULAR_PERMEABILITY														2.658	2.877														5	5														AKAP12;NPR1;CLDN5;RAMP2;TEK	AKAP12;RAMP2;PLVAP;CDH5;CLDN5
GOBP_DEVELOPMENTAL_INDUCTION													1.39															2															SPRY1;BMP4
GOBP_POSITIVE_REGULATION_OF_G1_S_TRANSITION_OF_MITOTIC_CELL_CYCLE										1.9															3															CCND2;AIF1;ANXA1
GOBP_POSITIVE_REGULATION_OF_TRANSLATION							1.801															4															VIM;PKM;PTAFR;THBS1
GOBP_NEGATIVE_REGULATION_OF_SIGNALING					1.364						1.467		2.129	4.095	4.167					12						14		16	35	33					SFRP1;PXDN;FBLN1;RGS4;RBMS3;IGFBP3;THY1;CAVIN3;FBN1;RGS16;IGFBP5;RGS5						SAMHD1;PRKCB;PLEK;ARHGAP25;FCGR3;SESN1;PTPN22;PRKCQ;PTPRC;ATM;LAPTM5;PIP4K2A;CD44;BCL2		PALM;SPRY1;ITGA6;BMP4;HIC1;PXDN;GJA1;GRB10;DLL1;MECOM;PCDH17;ICAM1;HDAC7;SMAD6;FKBP1A;SOX17	ITGA6;MMRN2;PCDH17;TGFBR3;ACKR3;KLF7;DLC1;RASIP1;DLL1;MECOM;BMP4;EGFL7;CAV2;PCGF2;RBMS3;SMAD6;SPRY4;DUSP5;SEC14L1;SKI;DAB2;GRB10;PXDN;YBX3;CAV1;IGFBP3;SEMA6A;PEA15A;MAPK7;TLR4;CNKSR3;FCGR3;HDAC7;UACA;PALM	UACA;KLF7;ECM1;RASIP1;IGFBP3;HEG1;SMAD6;ITGA6;MAPK7;SEMA6A;DLL1;HIC1;WWTR1;PCDH17;SEC14L1;TCIM;EGFL7;LGMN;TGFBR3;CAV2;SERPINE1;NOS3;ICAM1;PXDN;GNAI2;DAB2;PEA15A;SOX17;TLR4;FCGR3;SHANK3;CNKSR3;MMRN2
GOBP_POSITIVE_REGULATION_OF_CARDIAC_MUSCLE_CELL_DIFFERENTIATION														2.623															3															MEF2C;EFNB2;BMP4
GOBP_NEGATIVE_REGULATION_OF_GENE_EXPRESSION							1.634	3.469	3.401	2.92	2.136	1.484	1.314									12	22	20	18	14	11	11									CD83;VIM;LAPTM5;ANXA1;CD84;THBS1;AXL;TYROBP;NCKAP1L;KLF4;HMOX1;VSIR	VSIR;KLF4;FCGR3;PYCARD;SPI1;VSIG4;MERTK;LAPTM5;GZMB;ARRB2;TENT5A;AIF1;LRRK2;AXL;ANXA1;NCKAP1L;CD83;CD84;SLC11A1;VIM;LGMN;TYROBP	VIM;AXL;ARRB2;NCKAP1L;MSR1;FCGR3;AIF1;PYCARD;LRRK2;SLC11A1;LGMN;REL;TYROBP;MERTK;VSIG4;LAPTM5;VSIR;KLF4;CD84;SPI1	PTPN22;BTG2;PTPRC;NFKB1;SLC11A1;TYROBP;TNFAIP3;LAPTM5;ATM;KLF2;CD83;ANXA1;TENT5C;VIM;FYN;AIF1;KLF4;PABPC4	SRGN;CD83;KLF2;FCGR3;KLF4;VIM;FYN;PTPN22;PTPRC;ATM;AIF1;GZMB;LAPTM5;TYROBP	AIF1;PTPN22;SLC11A1;ATM;TNFAIP3;VIM;KLF4;TYROBP;LAPTM5;PTPRC;KLF2	BMP4;VIM;GJA1;KLF4;DLL1;HDAC7;ACVRL1;ANXA1;CD34;APP;PDGFB
GOBP_PERICYTE_CELL_DIFFERENTIATION													2.166	1.622														2	2														CD34;PDGFB	PDGFB;CD34
GOBP_CELL_DIFFERENTIATION_INVOLVED_IN_KIDNEY_DEVELOPMENT													2.603	3.014														4	6														CD34;LAMB2;BMP4;PDGFB	EDNRB;BMP4;MEF2C;LAMB2;PDGFB;CD34
GOBP_NEGATIVE_REGULATION_OF_OSTEOCLAST_DIFFERENTIATION					1.609															2															FBN1;SFRP1
GOBP_CARDIAC_VENTRICLE_DEVELOPMENT														2.214	1.87														7	6														BMP4;MEF2C;TGFBR3;GJA5;LUZP1;CPE;SMAD6	MEF2C;ENG;TGFBR3;NOS3;HEG1;SMAD6
GOBP_NEGATIVE_REGULATION_OF_ADENYLATE_CYCLASE_ACTIVITY								1.446	1.567														2	2														P2RY13;GNAI2	P2RY13;GNAI2
GOBP_COLLAGEN_METABOLIC_PROCESS				4.397	4.894	5.768	1.455	1.616	1.804				2.028						6	7	7	3	4	4				4						COL1A1;MMP2;COL1A2;COL5A1;VIM;ADAMTS2	MFAP4;COL1A1;VIM;COL5A1;COL1A2;MMP2;ADAMTS2	COL1A2;ENG;COL5A1;VIM;ADAMTS2;COL1A1;MFAP4	VIM;CTSB;VSIR	CTSB;VSIR;VIM;ARRB2	ARRB2;CTSB;VSIR;VIM				ADAM15;SERPINH1;BMP4;VIM
GOBP_BUD_ELONGATION_INVOLVED_IN_LUNG_BRANCHING													2.321															2															SPRY1;BMP4
GOBP_REGULATION_OF_TRANSPORTER_ACTIVITY														1.567															9															MEF2C;FXYD6;RELN;CNKSR3;FHL1;SELENON;HECW2;CAV1;APP
GOBP_LYMPHOCYTE_ACTIVATION							5.955	12.203	12.219	13.177	14.773	16.076										18	31	29	30	29	29										PRKCB;ICOSL;CD83;FGL2;LAPTM5;LST1;ANXA1;VCAM1;CD84;NFAM1;WDFY4;NCKAP1L;AXL;TYROBP;IRF8;FKBP1A;PREX1;VSIR	VSIR;FCGR3;FGL2;PYCARD;SPI1;CD44;VSIG4;IRF8;MERTK;MAP3K8;LAPTM5;IFI205;FCER1G;AIF1;THEMIS2;AXL;ANXA1;NCKAP1L;WDFY4;CD83;ICOSL;VCAM1;CD84;SLC11A1;NFAM1;WAS;PREX1;SYK;TYROBP;CD86;PRKCB	WAS;VCAM1;CD55;AXL;ICOSL;NCKAP1L;FCGR3;AIF1;PYCARD;SYK;SLC11A1;NFAM1;PRKCB;FCER1G;IRF8;IL6RA;THEMIS2;WDFY4;FGR;TYROBP;PREX1;FGL2;LST1;LAPTM5;MERTK;VSIG4;VSIR;CD84;SPI1	ITGAL;IL2RB;LAPTM5;FGR;PTPN22;AIF1;BCL2;CD44;TCF7;TYROBP;TNFAIP3;RAC2;FGL2;ANXA1;CD83;CD48;LST1;CORO1A;SASH3;SYK;ATM;KLRK1;LYN;FYN;FCER1G;PTPRC;SLC11A1;SH3KBP1;IKZF1;PRKCB	KIT;CD83;SYK;FCER1G;LCK;IFI205;FCGR3;PTPN22;AIF1;TOX;RASGRP1;PRKCB;CORO1A;IL2RB;PRKCQ;LAPTM5;KLRK1;SASH3;CD48;IKZF1;SH3KBP1;FYN;PTPRC;TYROBP;BCL2;TCF7;ATM;CD44;FGL2	SLC11A1;PRKCQ;IKZF1;SYK;SH3KBP1;LAPTM5;LCK;TCF7;AIF1;RAC2;FGL2;CORO1A;KLRK1;PRKCB;LST1;FCER1G;FGR;KIT;SASH3;TOX;PTPN22;ATM;ITGAL;TNFAIP3;RASGRP1;IL2RB;TYROBP;PTPRC;CD48
GOBP_EMBRYONIC_ORGAN_DEVELOPMENT													1.514															7															VASH1;NES;BMP4;GJA1;DLL1;PDGFB;SOX17
GOBP_POSITIVE_REGULATION_OF_MAST_CELL_ACTIVATION_INVOLVED_IN_IMMUNE_RESPONSE									1.791	1.856		2.124												2	2		2												SYK;FGR	FGR;SYK		FGR;SYK
GOBP_REGULATION_OF_CELL_DEVELOPMENT				1.45						2.141	1.344								6						10	7								FBLN1;FBN1;FLNA;SEMA5A;THY1;EDNRB						RPS19;TLR2;TYROBP;PRKCH;LYN;CXCR4;FLNA;SEMA4D;BCL2;MBP	KIT;FLNA;TYROBP;SEMA4D;MBP;PRKCH;BCL2
GOBP_RESPONSE_TO_INSULIN	1.501						2.005		2.008			1.649				6						6		7			5				GRB14;GHR;HMGCS2;ERRFI1;CAT;SRD5A1						PRKCB;NAMPT;PKM;TLR2;GNAI2;RAB31		RAB31;PRKCB;NAMPT;TLR2;UCP2;PKM;GNAI2			PRKCQ;PIP4K2A;TLR2;PRKCB;RAB31
GOBP_ACTIVATION_OF_INNATE_IMMUNE_RESPONSE								3.338	2.62	3.686	3.961	3.166											5	4	5	5	4											IFI205;PYCARD;HCK;SYK;TYROBP	HCK;PYCARD;SYK;TYROBP	TYROBP;SYK;KLRK1;LYN;FYN	SYK;IFI205;FYN;KLRK1;TYROBP	KLRK1;TYROBP;HCK;SYK
GOBP_POSITIVE_REGULATION_OF_TELOMERE_MAINTENANCE												1.321															2															PRKCQ;ATM
GOBP_NATURAL_KILLER_CELL_MEDIATED_IMMUNITY											2.701	2.016														4	3														RASGRP1;GZMB;KLRK1;CORO1A	KLRK1;RASGRP1;CORO1A
GOBP_PANCREAS_DEVELOPMENT													1.518															3															ANXA1;BMP4;DLL1
GOBP_HEART_VALVE_MORPHOGENESIS													2.672	3.119	1.799													4	6	4													ADAMTS9;BMP4;TIE1;SMAD6	BMP4;MEF2C;GJA5;TIE1;ADAMTS9;SMAD6	SMAD6;MEF2C;NOS3;TIE1
GOBP_NEGATIVE_REGULATION_OF_TRANSPORT							3.584	2.364	2.798													11	11	11													PRKCB;OAZ1;THBS1;ANXA1;TLR2;GNAI2;CD84;HMOX1;NCKAP1L;FKBP1A;SLC43A2	ANXA1;NCKAP1L;SLC43A2;FCGR3;GNAI2;UCP2;LRRK2;SPI1;CD84;FRMD4A;PRKCB	GNAI2;FCGR3;PRKCB;TLR2;UCP2;FRMD4A;NCKAP1L;LRRK2;SLC43A2;CD84;SPI1
GOBP_ETHANOL_METABOLIC_PROCESS	1.667															2															SULT2A7;ADH4
GOBP_CELLULAR_RESPONSE_TO_OXYGEN_CONTAINING_COMPOUND	2.307			2.646	3.183	2.101	2.723	5.692	6.749	5.214	2.98	4.012	1.986	2.284	4.22	18			13	16	11	16	28	28	24	17	18	14	26	30	GRB14;GHR;CPB2;AR;MLXIPL;HMGCS2;HAMP;ERRFI1;ABCA1;LRP6;CAT;STAT3;FABP1;SRD5A1;ADH4;MGST1;SOD1;ALDH1A7			COL1A1;MMP2;FBN1;FLNA;COL1A2;COL6A1;IGFBP5;TPM1;FBLN5;VIM;COL3A1;COL4A1;EDNRB	EDNRB;COL1A1;SFRP1;VIM;FOS;FBLN5;SOD3;FLNA;RGS4;COL1A2;MMP2;FBN1;TPM1;COL6A1;COL3A1;IGFBP5	IGFBP5;COL1A2;FBN1;RGS4;COL6A1;SERPINE1;SOD3;AGTR1A;VIM;COL1A1;TPM1	PRKCB;NAMPT;CYBB;RGS10;PKM;SGK1;ANXA1;TLR2;GNAI2;VCAM1;PTAFR;CYBA;AXL;RAB31;VIM;IRF8	PTAFR;RGS10;FCGR3;UCP2;PYCARD;SPI1;IRF8;PKM;ARRB2;AIF1;NAMPT;LRRK2;AXL;ANXA1;FOLR2;KDM6B;RAB31;GNAI2;CYBA;HCK;VCAM1;VIM;LGMN;MRC1;CYBB;LY86;CD86;PRKCB	VCAM1;CD55;VIM;MRC1;AXL;ARRB2;HCK;GNAI2;FCGR3;AIF1;PYCARD;PKM;LRRK2;CYBA;RGS10;RAB31;KDM6B;PRKCB;NAMPT;TLR2;LGMN;IRF8;SGK1;FOLR2;LY86;CYBB;UCP2;SPI1	TLR2;NFKB1;CYBB;SGK1;PTPN22;AIF1;TNFAIP3;PIP4K2A;KLF2;LEPROTL1;ANXA1;FLNA;VIM;SESN1;GNG2;ATM;NCF1;KLRK1;LYN;PTGER2;CCR5;FYN;RAB31;PRKCB	CYBB;PRKCB;FLNA;RAB31;KLF2;FCGR3;VIM;FYN;SESN1;PTPN22;PRKCQ;GNG2;CCR5;AIF1;ATM;PIP4K2A;KLRK1	AIF1;GNG2;HCK;PTPN22;ATM;PRKCQ;TNFAIP3;VIM;PIP4K2A;SGK1;CYBB;TLR2;KLRK1;PRKCB;PTGER2;CCR5;RAB31;KLF2	PALM;SGK1;COL4A1;NAMPT;VIM;SOGA1;GJA1;GRB10;ADAM15;PDGFB;ICAM1;ANXA1;COL3A1;APP	MRC1;ADAM15;MEF2C;NAMPT;EFNB2;VCAM1;KLF7;PDGFB;COL3A1;CAV2;POSTN;RPS6KA2;PCGF2;PLSCR4;APP;CALCRL;GRB10;VIM;CAV1;EDNRB;KLF2;KDM6B;MAPK7;TLR4;FCGR3;PALM	NAMPT;CALCRL;KLF7;ADAM15;MYO1C;MRC1;MEF2C;MAPK7;PDGFB;POSTN;AQP1;LGMN;RPS6KA2;CAV2;SERPINE1;NOS3;SGK1;ICAM1;VCAM1;PLSCR4;CD55;GNAI2;SOGA1;KDM6B;KLF2;TLR4;VIM;FCGR3;PXN;COL3A1
GOBP_RESPONSE_TO_HYDROGEN_PEROXIDE	1.489				1.323			1.347		2.277						4				3			4		5						HP;SOD1;CAT;FABP1				MMP2;COL1A1;CRYAB			LRRK2;AXL;ANXA1;KDM6B		TNFAIP3;KLF2;ANXA1;FYN;BCL2
GOBP_TUBE_MORPHOGENESIS				4.056	1.906	3.855	2.039			2.774	1.572		9.568	15.741	19.001				14	11	13	12			16	11		25	47	49				COL4A2;THBS2;MMP2;CCBE1;SPARC;FLNA;KLF4;NOTCH3;THBS1;THY1;SEMA5A;ADAMTS1;COL3A1;COL4A1	SFRP1;KLF4;TBX2;SPARC;FLNA;SEMA5A;NOTCH3;CCBE1;MMP2;THY1;COL3A1	MCAM;SPARC;THY1;ENG;THBS2;NOTCH3;SERPINE1;ADAMTS1;AGTR1A;TBX2;ADGRF5;CCBE1;KLF4	PRKCB;CTSH;CYBB;PKM;ANXA1;VSTM4;TNFAIP2;THBS1;TGFBI;KLF4;HMOX1;CXCR4			CSF1R;ETS1;CYBB;TNFAIP3;TGFBI;BTG1;SYK;KLF2;CXCR4;ADGRG1;TNFAIP2;ANXA1;PRKCB;FLNA;KLF4;BCL2	CSF1R;ETS1;CYBB;ADGRG1;PRKCB;FLNA;SYK;KLF2;TGFBI;KLF4;BCL2		COL4A2;ADGRG1;RHOJ;GJA1;KLF4;ADAMTS9;SPARC;ACVRL1;COL3A1;CD34;ANXA2;ANGPT2;VASH1;HDAC7;COL8A1;APOLD1;TIE1;SOX17;PTGIS;SPRY1;COL4A1;BMP4;ADAM15;DLL1;ANXA1	TAL1;ACVRL1;ADAM15;MMRN2;MEF2C;TGFBR3;ACKR3;COL8A1;EFNB2;ANXA2;DLC1;RASIP1;DLL1;ADGRF5;BMP4;EGFL7;KLF4;GJA5;ELK3;LUZP1;CLEC14A;KDR;EPHB4;ADAMTS9;STAB2;CDH13;NPR1;CALCRL;STAB1;PRCP;SKI;ADGRG1;RAMP2;TIE1;PTPRM;SPARC;CAV1;APOLD1;SEMA6A;KLF2;CLDN5;PTGIS;MAPK7;TEK;COL3A1;HDAC7;CD34	CALCRL;ECM1;PLXND1;APOLD1;PTGIS;RASIP1;HEG1;CLDN5;ADAM15;ACVRL1;ANXA2;CLEC14A;ADGRG1;CEMIP2;MEF2C;STAB1;MAPK7;SPARC;COL3A1;CDH13;SEMA6A;ROBO4;DLL1;PTPRM;PRCP;AQP1;FLT4;ITGA5;RAMP2;EGFL7;ENG;TGFBR3;SERPINE1;NOS3;FLT1;MCAM;ADGRF5;ADAMTS1;KDR;TAL1;EPHB4;SOX17;KLF2;TIE1;PTPRB;CDH5;STAB2;MMRN2;KLF4
GOBP_MULTICELLULAR_ORGANISM_GROWTH	1.315														1.68	4														6	GHR;SOD1;AR;STAT3														WWTR1;LGMN;PLAC8;KLF2;HEG1;COL3A1
GOBP_CARDIAC_MUSCLE_TISSUE_DEVELOPMENT						2.124							1.602	1.621							5							5	8							ENG;RGS4;TBX2;MYH11;TPM1							BMP4;GJA1;DLL1;ADAMTS9;FKBP1A	BMP4;KDM6B;MEF2C;TGFBR3;GJA5;EFNB2;ADAMTS9;DLL1
GOBP_MYELOID_CELL_ACTIVATION_INVOLVED_IN_IMMUNE_RESPONSE							2.169	4.932	5.317	4.437	2.968	6.389										4	8	8	7	5	8										CD84;PTAFR;HMOX1;TYROBP	PTAFR;PYCARD;SPI1;FCER1G;TYROBP;SYK;CD84;ITGB2	FGR;TYROBP;FCER1G;PYCARD;SYK;ITGB2;CD84;SPI1	FCER1G;TYROBP;RAC2;SYK;ITGB2;FGR;LYN	KIT;RASGRP1;SYK;FCER1G;TYROBP	FGR;RAC2;SYK;RASGRP1;KIT;ITGB2;TYROBP;FCER1G
GOBP_PHOSPHATIDYLINOSITOL_METABOLIC_PROCESS										1.352	2.153														4	5														PLEK;PIP4K2A;ATM;CSF1R	CSF1R;INPP4B;PLEK;PIP4K2A;ATM
GOBP_SEQUESTERING_OF_METAL_ION								1.807	1.941		2.124	2.273											2	2		2	2											S100A9;S100A8	S100A8;S100A9		S100A9;S100A8	S100A9;S100A8
GOBP_PIGMENT_CELL_DIFFERENTIATION				1.564	1.448						2.342	1.537		2.163					2	2						3	2		4					CD63;EDNRB	EDNRB;CD63						ZEB2;KIT;BCL2	KIT;ZEB2		MEF2C;ADAMTS9;ZEB2;EDNRB
GOBP_CELL_CYCLE_G1_S_PHASE_TRANSITION						1.558				1.829	1.589										4				6	5										TBX2;ADAMTS1;KLF4;CTDSPL				KLF4;ATM;ANXA1;CCND2;AIF1;BCL2	CCND2;KLF4;ATM;AIF1;BCL2
GOBP_COLLAGEN_CATABOLIC_PROCESS				1.492	1.392		1.365												2	2		2												ADAMTS2;MMP2	MMP2;ADAMTS2		CTSB;VSIR
GOBP_POSITIVE_REGULATION_OF_VESICLE_FUSION													2.166															2															ANXA1;ANXA2
GOBP_POSITIVE_REGULATION_OF_HYDROLASE_ACTIVITY						1.974	2.093	5.276	3.108	2.404	4.625	4.566									7	9	18	13	11	14	13									THY1;RGS4;AGTR1A;ITGA1;ANTXR1;FBLN1;PCOLCE	PLEK;CTSH;RGS10;LAPTM5;PTAFR;PLCB2;PREX1;LIMS1;VSIR	PTAFR;VSIR;LAPTM5;S100A8;LGMN;RGS10;LIMS1;PYCARD;PREX1;PLCB2;RGL1;S100A9;PLEK;SYK;LRRK2;CD86;CTSH;SRGAP2	SRGAP2;S100A8;RGL1;S100A9;LGMN;PYCARD;LRRK2;SYK;PREX1;LAPTM5;RGS10;VSIR;PLCB2	ARHGAP25;ARHGAP45;PTPRC;SYK;LAPTM5;LYN;CYFIP2;PLEK;FYN;SEMA4D;MBP	KIT;RASGRP1;CYFIP2;SYK;LCK;PLEK;ARHGAP25;SEMA4D;FYN;MBP;S100A8;PTPRC;LAPTM5;S100A9	ARHGAP25;S100A9;CYFIP2;ARHGAP45;SYK;KIT;RASGRP1;MBP;LAPTM5;PTPRC;LCK;S100A8;SEMA4D
GOBP_POSITIVE_REGULATION_OF_ESTABLISHMENT_OF_PROTEIN_LOCALIZATION										1.409															6															TLR2;RAC2;HCLS1;ITGB2;FLNA;FYN
GOBP_POSITIVE_REGULATION_OF_CELL_POPULATION_PROLIFERATION				1.663	1.322	1.536	2.416	2.766	2.966	3.706	3.13	4.722	1.986	3.661	5.249				9	9	8	13	18	17	18	15	17	12	26	28				MMP2;LAMC1;IGFBP5;NOTCH3;THBS1;SEMA5A;ADAMTS1;LAMB1;EDNRB	EDNRB;LAMC1;SFRP1;LAMB1;TBX2;SEMA5A;NOTCH3;MMP2;IGFBP5	IGFBP5;LAMC1;NOTCH3;ADAMTS1;AGTR1A;TBX2;LAMB1;PTH1R	CTSH;ICOSL;NAMPT;PTAFR;ANXA1;GNAI2;VCAM1;HCLS1;THBS1;CYBA;NCKAP1L;HMOX1;S100A6	S100A6;PTAFR;ANXA1;FOLR2;NCKAP1L;LGMN;CSF1R;GNAI2;CYBA;PYCARD;HCK;SYK;AIF1;NAMPT;ICOSL;VCAM1;CTSH;CD86	VCAM1;CD55;AIF1;NAMPT;LGMN;S100A6;HCLS1;CSF1R;ICOSL;PYCARD;NCKAP1L;SYK;FOLR2;CYBA;IL6RA;HCK;GNAI2	PTPN22;CSF1R;PTPRC;CORO1A;PBXIP1;TNFAIP3;SASH3;PRKCH;RAC2;SYK;HCLS1;RPS15A;ANXA1;ADGRG1;LYN;CCND2;AIF1;BCL2	CSF1R;KIT;ADGRG1;CORO1A;SYK;PBXIP1;CCND2;PRKCQ;PTPN22;PTPRC;AIF1;PRKCH;TOX;BCL2;SASH3	AIF1;HCK;PTPN22;RAC2;PRKCQ;TNFAIP3;PBXIP1;SYK;KIT;CORO1A;PRKCH;CSF1R;SASH3;PTPRC;HCLS1;ADGRG1;TOX	NES;NAMPT;ADGRG1;BMP4;CD320;SLC7A1;GJA1;DLL1;TIAM1;ACVRL1;ANXA1;PDGFB	ACVRL1;EPOR;MEF2C;NAMPT;TGFBR3;EFNB2;TIAM1;VCAM1;PDGFB;DLL1;MARCKSL1;BMP4;EGFL7;CAV2;MEIS2;KDR;SLC7A1;CDH13;CALCRL;ADGRG1;PLAC8;EDNRB;CLDN5;TLR4;NES;TEK	NAMPT;CALCRL;ECM1;PLAC8;CLDN5;ADGRG1;ACVRL1;EPOR;MEF2C;CDH13;PDGFB;DLL1;AQP1;WWTR1;FLT4;CD320;EGFL7;LGMN;TGFBR3;MARCKSL1;CAV2;FLT1;VCAM1;ADAMTS1;CD55;KDR;GNAI2;TLR4
GOBP_REGULATION_OF_T_CELL_PROLIFERATION							2.174	5.056	4.669	3.975	3.606	4.851										5	10	9	8	7	8										ICOSL;ANXA1;VCAM1;NCKAP1L;VSIR	ANXA1;VSIR;NCKAP1L;PYCARD;SYK;AIF1;VSIG4;VCAM1;ICOSL;CD86	VCAM1;CD55;AIF1;ICOSL;PYCARD;NCKAP1L;SYK;VSIG4;VSIR	PTPRC;CORO1A;RAC2;SYK;SASH3;ANXA1;PTPN22;AIF1	CORO1A;SYK;PRKCQ;PTPN22;PTPRC;AIF1;SASH3	AIF1;PTPN22;RAC2;PRKCQ;SYK;SASH3;CORO1A;PTPRC
GOBP_REGULATION_OF_BLOOD_CIRCULATION				1.357	2.127	1.462													4	6	4													FLNA;TPM1;MMP2;EDNRB	EDNRB;TBX2;FLNA;MMP2;TPM1;RGS4	TBX2;AGTR1A;TPM1;RGS4
GOBP_OVULATION_CYCLE_PROCESS				1.368															2															ADAMTS1;MMP2
GOBP_POSITIVE_REGULATION_OF_MYELOID_LEUKOCYTE_CYTOKINE_PRODUCTION_INVOLVED_IN_IMMUNE_RESPONSE											1.726	1.861														2	2														KIT;LAPTM5	LAPTM5;KIT
GOBP_ACTIN_CROSSLINK_FORMATION				2.159	2.004			1.751		1.942	2.067			1.411					2	2			2		2	2			2					FLNA;MARCKS	FLNA;MARCKS			AIF1;MARCKS		FLNA;AIF1	FLNA;AIF1			DPYSL3;MARCKS
GOBP_NEGATIVE_REGULATION_OF_SPROUTING_ANGIOGENESIS														1.984															3															KLF2;ADAMTS9;SEMA6A
GOBP_ENTRY_INTO_HOST															1.625															6															CD55;ITGA5;CAV2;CLEC4G;ICAM1;MRC1
GOBP_INOSITOL_LIPID_MEDIATED_SIGNALING										1.734	1.426	2.909			1.396										5	4	6			6										CSF1R;HCLS1;NCF1;FGR;SEMA4D	CSF1R;KIT;RASGRP1;SEMA4D	FGR;RASGRP1;KIT;CSF1R;HCLS1;SEMA4D			PDGFB;SELP;FLT1;PREX2;RELN;KDR
GOBP_DIRECT_OSSIFICATION				2.598	2.412														2	2														COL1A1;MMP2	MMP2;COL1A1
GOBP_AMEBOIDAL_TYPE_CELL_MIGRATION				2.646	1.735		1.618	1.514			1.543	1.34	4.806	5.604	8.317				8	7		7	9			7	6	13	21	24				CCBE1;SPARC;ACTA2;KLF4;THBS1;SEMA5A;FSTL1;EDNRB	EDNRB;FSTL1;KLF4;SEMA5A;SPARC;CCBE1;ACTA2		THBS1;CTSH;ANXA1;GLIPR2;HMOX1;KLF4;VSTM4	ANXA1;LGMN;VSTM4;KLF4;GLIPR2;ZEB2;CTSH;WASF2;SRGAP2			EVL;KIT;ETS1;SEMA4D;KLF4;ARHGDIB;ZEB2	ARHGDIB;KIT;KLF4;EVL;ZEB2;SEMA4D	ANGPT2;VASH1;BMP4;RHOJ;GJA1;KLF4;ADAMTS9;SPARC;HDAC7;ACVRL1;ANXA1;PDGFB;SOX17	ACVRL1;MMRN2;MEF2C;EFNB2;PDGFB;AKAP12;BMP4;KLF4;CLEC14A;KDR;EPHB4;ADAMTS9;CDH13;PRCP;PTPRM;ZEB2;SPARC;SEMA6A;EDNRB;TEK;HDAC7	PLXND1;ACVRL1;CLEC14A;MEF2C;SPARC;CDH13;SEMA6A;PDGFB;PTPRM;PRCP;FLT4;LGMN;ENG;NOS3;KDR;AKAP12;EPHB4;SOX17;SEMA3F;ZEB2;CDH5;PXN;MMRN2;KLF4
GOBP_REGULATION_OF_NEURON_MIGRATION														1.96	2.087														4	4														ADGRG1;RELN;COL3A1;SEMA6A	ADGRG1;SEMA6A;RELN;COL3A1
GOBP_FOREBRAIN_DEVELOPMENT				1.405						1.517	1.405								5						7	6								NOTCH3;SEMA5A;LAMB1;COL3A1;PRKG1						AKNA;BTG2;CSF1R;TYROBP;ADGRG1;CXCR4;FYN	CSF1R;ADGRG1;AKNA;FYN;TOX;TYROBP
GOBP_EPITHELIAL_CELL_APOPTOTIC_PROCESS															2.055															6															MAPK7;RAMP2;SERPINE1;CDH5;ICAM1;KDR
GOBP_NEGATIVE_REGULATION_OF_DEVELOPMENTAL_PROCESS				4.165	2.732	3.964							4.83	5.04	3.992				14	13	13							18	29	25				COL4A2;THBS2;FBLN1;FBN1;SPARC;KLF4;IGFBP5;NOTCH3;THBS1;THY1;SEMA5A;ADAMTS1;COL5A1;EDNRB	EDNRB;SFRP1;KLF4;FBLN1;TBX2;SPARC;SEMA5A;RGS4;NOTCH3;THY1;FBN1;IGFBP5;COL5A1	IGFBP5;FBN1;SPARC;THY1;RGS4;THBS2;NOTCH3;SERPINE1;COL5A1;ADAMTS1;TBX2;KLF4;FBLN1							ANGPT2;COL4A2;SPRY1;VASH1;BMP4;KLF4;DLL1;ACVRL1;PDGFB;ADAMTS9;SPARC;HDAC7;SMAD6;ANXA1;ABCG1;APP;TIE1;SOX17	ACVRL1;KLF7;PDGFB;DLL1;BMP4;KLF4;MEIS2;ADAMTS9;APP;SMAD6;NPR1;SPRY4;STAB1;SKI;ABCG1;PLAC8;TIE1;PTPRM;YBX3;SPARC;CAV1;SEMA6A;EDNRB;KLF2;CLDN5;TLR4;TEK;FCGR3;HDAC7	KLF7;ECM1;PLAC8;CLDN5;SMAD6;ACVRL1;STAB1;SPARC;PDGFB;SEMA6A;DLL1;PTPRM;WWTR1;LGMN;SERPINE1;NOS3;ABCG1;ADAMTS1;SOX17;SEMA3F;KLF2;TLR4;TIE1;FCGR3;KLF4
GOBP_CALCIUM_MEDIATED_SIGNALING										2.13	1.851	1.47		1.493											6	5	4		7											PTPRC;SYK;RCAN3;CXCR4;PLEK;CCR5	SYK;PLEK;PTPRC;CCR5;RCAN3	RCAN3;CCR5;SYK;PTPRC		EDNRB;CDH13;SELP;MAPK7;ACKR3;VCAM1;KDR
GOBP_TUMOR_NECROSIS_FACTOR_SUPERFAMILY_CYTOKINE_PRODUCTION							5.887	7.363	7.032	3.803	3.461	5.594										10	13	12	8	7	9										CYBB;PTAFR;TLR2;IFNGR1;CD84;CYBA;THBS1;AXL;TYROBP;VSIR	PTAFR;IFNGR1;VSIR;CYBB;ARRB2;CYBA;PYCARD;LRRK2;SYK;TYROBP;CD84;AXL;CD86	CYBB;TLR2;TYROBP;AXL;ARRB2;PYCARD;IFNGR1;LRRK2;SYK;CYBA;VSIR;CD84	TLR2;PTPRC;CYBB;TYROBP;TNFAIP3;SASH3;SYK;PTPN22	RASGRP1;CYBB;SYK;PTPRC;PTPN22;SASH3;TYROBP	PTPN22;TNFAIP3;SYK;RASGRP1;SASH3;TYROBP;CYBB;TLR2;PTPRC
GOBP_RESPONSE_TO_NUTRIENT							1.623															4															GNAI2;VCAM1;CYBB;HMOX1
GOBP_NEGATIVE_REGULATION_OF_ORGANIC_ACID_TRANSPORT							1.718															2															SLC43A2;THBS1
GOBP_CANONICAL_WNT_SIGNALING_PATHWAY					1.854															6															EDNRB;COL1A1;SFRP1;KLF4;SEMA5A;RBMS3
GOBP_REGULATION_OF_CARDIAC_MUSCLE_CELL_DIFFERENTIATION													1.698	2.983														2	4														BMP4;DLL1	MEF2C;EFNB2;BMP4;DLL1
GOBP_CARDIAC_CONDUCTION_SYSTEM_DEVELOPMENT													1.362															2															GJA1;BMP4
GOBP_NEGATIVE_REGULATION_OF_CYSTEINE_TYPE_ENDOPEPTIDASE_ACTIVITY										1.444	1.606														3	3														CD44;KLF4;TNFAIP8	CD44;TNFAIP8;KLF4
GOBP_NEGATIVE_REGULATION_OF_PHOSPHOPROTEIN_PHOSPHATASE_ACTIVITY							2.619	1.332	1.45													3	2	2													GNAI2;FKBP1A;NCKAP1L	NCKAP1L;GNAI2	NCKAP1L;GNAI2
GOBP_POSITIVE_REGULATION_OF_CELL_ADHESION				1.7	1.833		2.602	5.929	2.906	7.004	8.244	5.542	2.033	3.236	1.964				6	7		9	17	11	17	17	13	8	16	12				FBLN2;FLNA;CCDC80;THY1;TPM1;NID1	SFRP1;FLNA;CCDC80;THY1;TPM1;NID1;FBLN2		ICOSL;CD83;PTAFR;ANXA1;VCAM1;NCKAP1L;PREX1;LIMS1;VSIR	ANXA1;MAP3K8;PTAFR;VSIR;NCKAP1L;DAB2;CD83;LIMS1;PYCARD;PREX1;SYK;AIF1;CD44;ICOSL;VCAM1;ITGB2;CD86	VCAM1;CD55;AIF1;ICOSL;PYCARD;DAB2;NCKAP1L;SYK;PREX1;ITGB2;VSIR	PTPN22;CD44;ETS1;PTPRC;CORO1A;SASH3;SYK;ATM;ITGB2;KLRK1;LYN;ANXA1;CD83;ADGRG1;FLNA;FYN;AIF1	ETS1;CD83;RASGRP1;ADGRG1;CORO1A;FLNA;SYK;LCK;FYN;PRKCQ;PTPN22;PTPRC;ATM;AIF1;CD44;KLRK1;SASH3	AIF1;PTPN22;PRKCQ;ATM;SYK;RASGRP1;ITGB2;CORO1A;SASH3;PTPRC;LCK;KLRK1;ADGRG1	ADGRG1;SLC7A1;ANXA1;NEDD9;FBLN2;COL8A1;NID1;PDGFB	CDH13;SELP;ADGRG1;COL8A1;CAV1;DAB2;EFNB2;VCAM1;FBLN2;TEK;NID1;MMRN1;KDR;PDGFB;SLC7A1;ABI3BP	CD55;DAB2;ITGA5;CDH13;PDGFB;SELP;KDR;ADGRG1;NEDD9;NID1;VCAM1;ABI3BP
GOBP_REGULATION_OF_PHAGOCYTOSIS							2.169	6.896	9.717	5.446	3.855	7.604										4	10	12	8	6	9										TLR2;CYBA;RAB31;NCKAP1L	NCKAP1L;FCGR3;RAB31;CYBA;PYCARD;FCER1G;HCK;SYK;MERTK;SLC11A1	RAB31;FCGR3;SLC11A1;FGR;TLR2;FCER1G;PYCARD;NCKAP1L;SYK;MERTK;CYBA;HCK	TLR2;FCER1G;IL2RB;PTPRC;SLC11A1;SYK;RAB31;FGR	SYK;FCER1G;RAB31;FCGR3;IL2RB;PTPRC	HCK;SLC11A1;FGR;SYK;IL2RB;TLR2;PTPRC;RAB31;FCER1G
GOBP_ICOSANOID_BIOSYNTHETIC_PROCESS								1.648		1.884		1.346											3		3		2											ANXA1;TBXAS1;SYK		ALOX5AP;ANXA1;SYK		SYK;ALOX5AP
GOBP_B_CELL_DIFFERENTIATION							1.801	3.183	3.507	1.563	3.196	1.963										4	7	7	4	6	4										VCAM1;IRF8;NFAM1;NCKAP1L	NCKAP1L;NFAM1;FCGR3;SPI1;SYK;VCAM1;IRF8	FCGR3;VCAM1;NFAM1;NCKAP1L;IRF8;SYK;SPI1	ATM;BCL2;SYK;PTPRC	KIT;SYK;FCGR3;PTPRC;ATM;BCL2	KIT;SYK;PTPRC;ATM
GOBP_HOMOPHILIC_CELL_ADHESION_VIA_PLASMA_MEMBRANE_ADHESION_MOLECULES														1.369	2.49														6	8														CDH13;ESAM;PCDH17;PECAM1;PTPRM;PCDH12	PCDH17;ESAM;CDH13;PECAM1;ROBO4;CDH5;PTPRM;PCDH12
GOBP_REGULATION_OF_NEUTROPHIL_MIGRATION							1.32															2															MPP1;NCKAP1L
GOBP_EMBRYONIC_EYE_MORPHOGENESIS					1.448	1.609														2	2														TBX2;FBN1	TBX2;FBN1
GOBP_REGIONALIZATION													1.92	1.503	1.684													7	10	10													SPRY1;ADGRG1;BMP4;ACVRL1;DLL1;SMAD6;SOX17	ACVRL1;BMP4;MEF2C;CHSY1;SKI;ADGRG1;RELN;PCGF2;DLL1;SMAD6	MEF2C;ETS2;SOX17;SEMA3F;CHSY1;DLL1;ADGRG1;SMAD6;RELN;ACVRL1
GOBP_POSITIVE_REGULATION_OF_TYROSINE_PHOSPHORYLATION_OF_STAT_PROTEIN									1.567	2.43	1.822	1.986												3	4	3	3												IL6RA;HCLS1;CSF1R	HCLS1;FYN;CSF1R;LYN	CSF1R;KIT;FYN	HCLS1;KIT;CSF1R
GOBP_ENZYME_LINKED_RECEPTOR_PROTEIN_SIGNALING_PATHWAY				4.304	3.812	3.035		1.744	2.993	1.54	1.719	2.853	4.853	5.097	7.027				15	16	12		16	18	13	12	14	19	31	33				COL4A2;COL1A1;MMP2;CCBE1;FBN1;COL1A2;LTBP4;IGFBP5;THBS1;FSTL1;ITGA8;CD63;COL3A1;COL4A1;VIM	FSTL1;COL1A1;VIM;SFRP1;FOS;LTBP4;CD63;TBX2;COL1A2;ITGA8;CCBE1;IGFBP3;MMP2;FBN1;COL3A1;IGFBP5	IGFBP5;COL1A2;FBN1;ENG;ITGA8;CD63;IGFBP3;TBX2;VIM;ITGA1;CCBE1;COL1A1		VIM;LGMN;DAB2;CCDC88A;CSF1R;GNAI2;ARRB2;SPI1;SLA;HCK;SYK;NAMPT;MERTK;ZEB2;AXL;PRKCB	VIM;PRKCB;FGR;NAMPT;CCDC88A;LGMN;CSF1R;SPI1;AXL;ARRB2;DAB2;SLA;SYK;MERTK;PILRB1;HCK;ZEB2;GNAI2	CSF1R;CCDC88A;SYK;PIP4K2A;NCF1;LEPROTL1;FGR;LYN;CYFIP2;PRKCB;FYN;VIM;SLA	CSF1R;KIT;CCDC88A;PRKCB;CYFIP2;SYK;LCK;VIM;FYN;ZEB2;PRKCQ;PIP4K2A	HCK;FGR;PRKCQ;CCDC88A;CYFIP2;VIM;SYK;PIP4K2A;KIT;CSF1R;LCK;PRKCB;ZEB2;SLA	COL4A2;TIAM1;ACVRL1;COL3A1;NAMPT;GRB10;FKBP1A;ANGPT2;SOGA1;LTBP4;NEDD9;TIE1;SPRY1;COL4A1;BMP4;VIM;DLL1;SMAD6;PDGFB	TAL1;ACVRL1;MMRN2;NAMPT;TGFBR3;EFNB2;TIAM1;PDGFB;DLL1;BMP4;CAV2;CLEC14A;KDR;EPHB4;SMAD6;CDH13;NPR1;SPRY4;SKI;TIE1;DAB2;ZEB2;GRB10;VIM;LTBP4;CAV1;IGFBP3;SEMA6A;CLDN5;TEK;COL3A1	NAMPT;PXN;IGFBP3;CLDN5;MYO1C;SMAD6;CLEC14A;ACVRL1;COL3A1;CDH13;SEMA6A;PDGFB;DLL1;WWTR1;FLT4;ITGA5;LGMN;ENG;TGFBR3;CAV2;FLT1;KDR;GNAI2;DAB2;TAL1;EPHB4;SOGA1;ZEB2;VIM;TIE1;CDH5;NEDD9;MMRN2
GOBP_REGULATION_OF_PHOSPHORUS_METABOLIC_PROCESS								1.953	2.932	3.313	2.009	2.815		1.77	4.087								21	22	22	16	17		27	33								PTAFR;DUSP6;CSF1R;PYCARD;PLEK;CD44;MERTK;ARRB2;AIF1;LRRK2;AXL;NCKAP1L;FGD2;GNAI2;SLC11A1;RAP2B;DAB2;CCDC88A;SYK;ITGB2;CD86	CCDC88A;AXL;ARRB2;DAB2;NCKAP1L;GNAI2;AIF1;PYCARD;LRRK2;SYK;GADD45B;SLC11A1;RAP2B;HCLS1;PILRB1;IL6RA;ITGB2;FGD2;MARCO;FGR;CSF1R;MERTK	FGR;PTPN22;AIF1;BCL2;CD44;CSF1R;TNFAIP3;PIP4K2A;GADD45B;PLEK;CCND2;SYK;CCDC88A;ATM;HCLS1;NCF1;LYN;FYN;SEMA4D;PTPRC;SLC11A1;ITGB2	CSF1R;KIT;CCDC88A;RASGRP1;SYK;PLEK;CCND2;SEMA4D;FYN;PTPN22;PTPRC;PIP4K2A;ATM;AIF1;CD44;BCL2	AIF1;FGR;SLC11A1;CCDC88A;ATM;TNFAIP3;GADD45B;PTPN22;SYK;RASGRP1;KIT;CSF1R;PIP4K2A;ITGB2;PTPRC;HCLS1;SEMA4D		TAL1;ACVRL1;ITGA6;MEF2C;DLC1;PDGFB;RASIP1;ADGRF5;BMP4;RELN;KDR;EPHB4;LDB2;SMAD6;APP;SPRY4;PECAM1;TIE1;DAB2;GRB10;CAV1;IGFBP3;EDNRB;TLR4;CNKSR3;KCTD20;TEK	EHD4;RASIP1;HEG1;IGFBP3;SMAD6;ITGA6;ACVRL1;RELN;MEF2C;PDGFB;WWTR1;FLT4;ITGA5;TCIM;ENG;NOS3;FLT1;ADGRF5;KCTD20;KDR;DAB2;GNAI2;TAL1;SH2D3C;EPHB4;PECAM1;TIE1;TLR4;PTPRB;CDH5;LIMCH1;NEDD9;CNKSR3
GOBP_REGULATION_OF_LEUKOCYTE_MEDIATED_CYTOTOXICITY								3.733	3.071	1.565	3.461	2.769											6	5	3	5	4											NCKAP1L;STX7;FCGR3;ARRB2;SPI1;TYROBP	FCGR3;TYROBP;ARRB2;NCKAP1L;SPI1	TYROBP;KLRK1;PTPRC	RASGRP1;FCGR3;PTPRC;KLRK1;TYROBP	KLRK1;TYROBP;RASGRP1;PTPRC
GOBP_REGULATION_OF_CELL_JUNCTION_ASSEMBLY				1.589										1.812	1.573				4										8	7				THBS2;THBS1;THY1;GPC6										ACVRL1;CLDN5;MEF2C;TEK;DLC1;KDR;CAV1;APP	MEF2C;CLDN5;LIMCH1;MYO1C;ACVRL1;PEAK1;KDR
GOBP_REGULATION_OF_INTRINSIC_APOPTOTIC_SIGNALING_PATHWAY_BY_P53_CLASS_MEDIATOR										1.427	1.545														2	2														CD44;BCL2	CD44;BCL2
GOBP_PODOSOME_ASSEMBLY												1.929															2															BIN2;HCK
GOBP_RESPONSE_TO_VITAMIN_A	1.609															2															HAMP;CAT
GOBP_REGULATION_OF_CELL_DIFFERENTIATION					1.872	2.107	2.434	2.974	2.112	3.119	2.942	2.067	2.716	2.917	3.303					15	13	18	26	21	23	20	16	19	34	33					EDNRB;COL1A1;SFRP1;FOS;FBLN1;KLF4;SEMA5A;FLNA;RGS4;IGFBP3;NOTCH3;THY1;FBN1;IGFBP5;COL5A1	IGFBP5;FBN1;THY1;RGS4;ENG;NOTCH3;SERPINE1;COL5A1;AGTR1A;IGFBP3;KLF4;COL1A1;FBLN1	JDP2;CD83;CXCR4;FGL2;ANXA1;TRPS1;TLR2;GLIPR2;NFAM1;HCLS1;C1QC;AXL;TYROBP;NCKAP1L;KLF4;PREX1;LIMS1;VSIR	VSIR;KLF4;FCGR3;FGL2;SPI1;C1QC;MAF;ARRB2;TENT5A;JDP2;TRPS1;LRRK2;AXL;ANXA1;NCKAP1L;CD83;GLIPR2;NFAM1;DAB2;LIMS1;PREX1;SYK;TYROBP;METRNL;ZEB2;CD86	AXL;ARRB2;DAB2;MSR1;NCKAP1L;ZEB2;MAF;FCGR3;LRRK2;SYK;NFAM1;TLR2;HCLS1;C1QC;IL6RA;TYROBP;PREX1;FGL2;VSIR;KLF4;SPI1	TLR2;ETS1;NFKB1;CXCR4;BCL2;MBP;TCF7;TYROBP;BTG1;FGL2;ANXA1;CD83;FLNA;PRKCH;SASH3;SYK;HCLS1;LYN;SEMA4D;RPS19;PTPRC;TENT5C;KLF4	ETS1;KIT;CD83;MAF;SYK;FCGR3;ZEB2;TOX;RASGRP1;SASH3;FLNA;KLF4;SEMA4D;MBP;PTPRC;PRKCH;BCL2;TYROBP;TCF7;FGL2	SYK;RASGRP1;KIT;PRKCH;FGL2;KLF4;TYROBP;TLR2;SASH3;MBP;PTPRC;TCF7;HCLS1;ZEB2;TOX;SEMA4D	GJA1;KLF4;TIAM1;ADAMTS9;ACVRL1;CD34;APP;CEBPD;HDAC7;NEDD9;APOLD1;SOX17;SPRY1;BMP4;DLL1;SMAD6;ANXA1;ABCG1;PDGFB	TAL1;ACVRL1;MEF2C;TIAM1;EFNB2;KLF7;PDGFB;DLL1;MAF;BMP4;RELN;KLF4;MEIS2;KDR;ADAMTS9;APP;SMAD6;CSNK1E;SPRY4;SKI;ABCG1;RAMP2;DAB2;ZEB2;CAV1;IGFBP3;APOLD1;SEMA6A;EDNRB;CLDN5;TLR4;FCGR3;HDAC7;CD34	KLF7;PLXND1;APOLD1;IGFBP3;CLDN5;SMAD6;ACVRL1;RELN;MEF2C;PDGFB;SEMA6A;DLL1;CSNK1E;WWTR1;MAF;RAMP2;ENG;TCF4;SERPINE1;ABCG1;KDR;DAB2;TAL1;SOX17;SEMA3F;ZEB2;CEBPD;TLR4;CDH5;FCGR3;SHANK3;NEDD9;KLF4
GOBP_INFLAMMATORY_RESPONSE_TO_ANTIGENIC_STIMULUS								1.315	2.195	2.301	2.507	2.747											3	4	4	4	4											HCK;FCGR3;SYK	HCK;FCGR3;SYK;FGR	FYN;FGR;LYN;SYK	SYK;RASGRP1;FCGR3;FYN	RASGRP1;HCK;SYK;FGR
GOBP_CELL_JUNCTION_DISASSEMBLY							2.826	2.513	2.691													3	3	3													C1QA;C1QB;C1QC	C1QC;C1QA;C1QB	C1QB;C1QA;C1QC
GOBP_ASTROCYTE_ACTIVATION							1.718	1.415	1.535													2	2	2													IFNGR1;C1QA	IFNGR1;C1QA	IFNGR1;C1QA
GOBP_VACUOLE_ORGANIZATION
GOBP_CARDIAC_VENTRICLE_MORPHOGENESIS														1.397	1.498														4	4														MEF2C;BMP4;CPE;TGFBR3	MEF2C;ENG;TGFBR3;HEG1
GOBP_TOLL_LIKE_RECEPTOR_3_SIGNALING_PATHWAY										1.664		1.929													2		2													PTPN22;TNFAIP3		TNFAIP3;PTPN22
GOBP_REGULATION_OF_INSULIN_LIKE_GROWTH_FACTOR_RECEPTOR_SIGNALING_PATHWAY					1.656	1.855														2	2														IGFBP5;IGFBP3	IGFBP3;IGFBP5
GOBP_REGULATION_OF_NATURAL_KILLER_CELL_ACTIVATION							1.405		2.072	2.142	3.385	4.896										2		3	3	4	5										AXL;TYROBP		AXL;TYROBP;FGR	PTPN22;FGR;TYROBP	PTPN22;RASGRP1;TOX;TYROBP	FGR;PTPN22;RASGRP1;TYROBP;TOX
GOBP_REGULATION_OF_DOPAMINERGIC_NEURON_DIFFERENTIATION														1.563															2															TIAM1;CSNK1E
GOBP_MAST_CELL_ACTIVATION								1.337	2.234	2.333	2.543	3.8											3	4	4	4	5											CD84;SYK;FCGR3	FCGR3;SYK;CD84;FGR	FGR;RAC2;LYN;SYK	SYK;KIT;RASGRP1;FCGR3	FGR;RAC2;SYK;RASGRP1;KIT
GOBP_ENTEROENDOCRINE_CELL_DIFFERENTIATION													1.454															2															BMP4;DLL1
GOBP_ACTIN_FILAMENT_POLYMERIZATION							3.541	4.998	5.449	2.476	2.132	3.914										7	10	10	6	5	7										ARPC1B;COTL1;TMSB10;HCLS1;NCKAP1L;PREX1;CDC42EP3	NCKAP1L;ARPC1B;TMSB10;WAS;PYCARD;PREX1;HCK;AIF1;COTL1;CDC42EP3	WAS;AIF1;COTL1;HCLS1;PYCARD;NCKAP1L;TMSB10;PREX1;ARPC1B;HCK	CORO1A;COTL1;HCLS1;CYFIP2;AIF1;EVL	EVL;CYFIP2;CORO1A;COTL1;AIF1	AIF1;HCK;CYFIP2;COTL1;CORO1A;EVL;HCLS1
GOBP_ENDOTHELIAL_CELL_PROLIFERATION							1.492						3.307	6.927	6.733							4						7	15	14							CYBA;HMOX1;VSTM4;THBS1						VASH1;BMP4;PDGFB;SPARC;ACVRL1;CD34;TIE1	CDH13;ACVRL1;BMP4;KDR;MMRN2;MEF2C;EGFL7;TIE1;PTPRM;CAV2;TEK;SPARC;PDGFB;CAV1;CD34	FLT4;MEF2C;SPARC;PDGFB;CDH13;EGFL7;ECM1;TIE1;CAV2;FLT1;PTPRM;ACVRL1;MMRN2;KDR
GOBP_REGULATION_OF_VASCULAR_WOUND_HEALING										2.13															2															TNFAIP3;CXCR4
GOBP_MESENCHYME_DEVELOPMENT				1.696	2.444								1.318	1.504	2.074				5	7								5	9	10				COL1A1;FLNA;ACTA2;SEMA5A;EDNRB	EDNRB;COL1A1;SFRP1;TBX2;SEMA5A;FLNA;ACTA2								SPRY1;BMP4;ADAM15;TIAM1;ACVRL1	EDNRB;ACVRL1;BMP4;ADAM15;MEF2C;TGFBR3;DAB2;TIAM1;SEMA6A	WWTR1;MEF2C;DAB2;SEMA6A;ENG;SEMA3F;TGFBR3;NOS3;ADAM15;ACVRL1
GOBP_POSITIVE_REGULATION_OF_ANTIGEN_RECEPTOR_MEDIATED_SIGNALING_PATHWAY							1.634	1.332	1.45	2.507	3.889	4.167										2	2	2	3	4	4										PRKCB;NFAM1	NFAM1;PRKCB	NFAM1;PRKCB	PRKCB;PRKCH;PTPRC	LCK;PRKCH;PTPRC;PRKCB	PRKCB;PRKCH;PTPRC;LCK
GOBP_DENDRITIC_CELL_ANTIGEN_PROCESSING_AND_PRESENTATION							2.093	3.094	3.259	2	2.124	2.273										2	3	3	2	2	2										FGL2;THBS1	FCGR3;FGL2;SLC11A1	FCGR3;SLC11A1;FGL2	SLC11A1;FGL2	FCGR3;FGL2	SLC11A1;FGL2
GOBP_REGULATION_OF_DENDRITIC_SPINE_MAINTENANCE											2.248															2															FCGR3;FYN
GOBP_REGULATION_OF_EPITHELIAL_CELL_DIFFERENTIATION													2.189	1.976	2.753													5	7	8													SPRY1;BMP4;DLL1;ACVRL1;APOLD1	ACVRL1;BMP4;CLDN5;KLF7;CAV1;APOLD1;DLL1	WWTR1;KLF7;APOLD1;CDH5;SERPINE1;DLL1;CLDN5;ACVRL1
GOBP_NEGATIVE_REGULATION_OF_TOLL_LIKE_RECEPTOR_2_SIGNALING_PATHWAY										2.376															2															TNFAIP3;LYN
GOBP_POSITIVE_REGULATION_OF_REACTIVE_OXYGEN_SPECIES_METABOLIC_PROCESS							2.533	2.892	3.11	1.592		1.929										4	5	5	3		3										CYBA;TYROBP;GNAI2;THBS1	CYBA;GNAI2;SYK;TYROBP;ITGB2	TYROBP;CYBA;SYK;ITGB2;GNAI2	TYROBP;ITGB2;SYK		TYROBP;SYK;ITGB2
GOBP_HEAD_MORPHOGENESIS				1.582	1.456														2	2														COL1A1;MMP2	MMP2;COL1A1
GOBP_SMOOTH_MUSCLE_CELL_MIGRATION				2.805	2.504	3.964				1.523	1.697			1.976	2.877				4	4	5				3	3			5	6				IGFBP5;ADAMTS1;PRKG1;TPM1	PRKG1;IGFBP5;IGFBP3;TPM1	IGFBP5;ADAMTS1;SERPINE1;IGFBP3;TPM1				AIF1;BCL2;S100A11	S100A11;BCL2;AIF1			MEF2C;TLR4;GRB10;PDGFB;IGFBP3	MEF2C;PDGFB;TLR4;SERPINE1;IGFBP3;ADAMTS1
GOBP_MEMBRANE_BIOGENESIS														1.616															4															UGCG;CAV2;CAV1;ANXA2
GOBP_REGULATION_OF_MULTICELLULAR_ORGANISM_GROWTH	1.463															3															GHR;SOD1;STAT3
GOBP_POSITIVE_REGULATION_OF_PROTEIN_LOCALIZATION_TO_NUCLEUS										1.391															3															HCLS1;FLNA;FYN
GOBP_NEGATIVE_REGULATION_OF_RESPONSE_TO_BIOTIC_STIMULUS								1.548															4															FGL2;SAMHD1;ARRB2;VSIG4
GOBP_EMBRYONIC_HEART_TUBE_DEVELOPMENT													1.512		1.383													3		4													GJA1;DLL1;SOX17		SOX17;ENG;DLL1;MEF2C
GOBP_MATURATION_OF_SSU_RRNA_FROM_TRICISTRONIC_RRNA_TRANSCRIPT_SSU_RRNA_5_8S_RRNA_LSU_RRNA										1.316															2															RPS14;RPS19
GOBP_REGULATION_OF_VASCULOGENESIS														2.131	1.359														3	2														KDR;CD34;RAMP2	RAMP2;KDR
GOBP_NEGATIVE_REGULATION_OF_CELLULAR_RESPONSE_TO_GROWTH_FACTOR_STIMULUS														1.503															5															SPRY4;MMRN2;SKI;SEMA6A;SMAD6
GOBP_REGULATION_OF_HEMOPOIESIS							3.634	4.25	3.507	3.711	4.299	3.411										10	13	11	11	11	9										CD83;FGL2;ANXA1;NFAM1;HCLS1;C1QC;AXL;TYROBP;NCKAP1L;VSIR	ANXA1;VSIR;NCKAP1L;NFAM1;CD83;FCGR3;FGL2;SPI1;C1QC;TYROBP;SYK;AXL;CD86	FCGR3;NFAM1;TYROBP;HCLS1;AXL;C1QC;NCKAP1L;SYK;FGL2;VSIR;SPI1	ETS1;PTPRC;TCF7;TYROBP;SASH3;SYK;HCLS1;FGL2;LYN;ANXA1;CD83	ETS1;CD83;RASGRP1;SYK;TCF7;TYROBP;FCGR3;PTPRC;TOX;FGL2;SASH3	SYK;RASGRP1;SASH3;FGL2;TYROBP;PTPRC;TCF7;HCLS1;TOX
GOBP_ICOSANOID_METABOLIC_PROCESS							2.067		1.737	1.844		1.519										4		4	4		3										TLR2;CYP2A4;ANXA1;TBXAS1		TBXAS1;TLR2;SYK;CYP2A4	ALOX5AP;ANXA1;TLR2;SYK		TLR2;SYK;ALOX5AP
GOBP_POSITIVE_REGULATION_OF_STRESS_FIBER_ASSEMBLY												1.321															2															EVL;CCDC88A
GOBP_CELLULAR_RESPONSE_TO_VITAMIN					1.507															2															COL1A1;SFRP1
GOBP_REGULATION_OF_PINOCYTOSIS							2.144	1.872	2.008													2	2	2													AXL;PPT1	AXL;PPT1	AXL;PPT1
GOBP_RECEPTOR_INTERNALIZATION								2.02	2.263	1.712		2.125		1.873									5	5	4		4		6									RAB31;ARRB2;FCER1G;SYK;ITGB2	RAB31;FCER1G;ARRB2;SYK;ITGB2	ITGB2;FCER1G;SYK;RAB31		RAB31;SYK;FCER1G;ITGB2		CALCRL;ACKR3;RAMP2;EFNB2;ANXA2;CAV1
GOBP_POSITIVE_REGULATION_OF_CELLULAR_EXTRAVASATION															1.359															2															PLVAP;ICAM1
GOBP_CELLULAR_RESPONSE_TO_MURAMYL_DIPEPTIDE										2.203	2.323	2.481													2	2	2													PTPN22;VIM	PTPN22;VIM	VIM;PTPN22
GOBP_NEGATIVE_REGULATION_OF_T_CELL_MEDIATED_IMMUNITY								1.332	1.45		1.639												2	2		2												FCGR3;NCKAP1L	FCGR3;NCKAP1L		PTPRC;FCGR3
GOBP_POSITIVE_REGULATION_OF_T_HELPER_CELL_DIFFERENTIATION								1.446															2															ANXA1;CD86
GOBP_POSITIVE_REGULATION_OF_TRANSFERASE_ACTIVITY								1.724	2.997	1.898	1.93	2.72			1.331								11	13	10	9	10			12								NCKAP1L;FGD2;KLF4;CCDC88A;CSF1R;SYK;MERTK;LRRK2;AXL;SLC11A1;CD86	SLC11A1;FGR;CCDC88A;CSF1R;AXL;NCKAP1L;LRRK2;SYK;MERTK;PILRB1;IL6RA;FGD2;KLF4	KLF4;CSF1R;PTPRC;SLC11A1;CCDC88A;SYK;NCF1;FGR;LYN;CCND2	CSF1R;KIT;CCDC88A;RASGRP1;SYK;CCND2;KLF4;PRKCQ;PTPRC	FGR;SLC11A1;PRKCQ;CCDC88A;SYK;RASGRP1;KIT;CSF1R;KLF4;PTPRC			FLT4;TAL1;PDGFB;EPHB4;TCIM;TIE1;TLR4;FLT1;NEDD9;RELN;KLF4;KDR
GOBP_PEROXISOME_ORGANIZATION	1.964															3															MAVS;SCP2;LONP2
GOBP_POSITIVE_REGULATION_OF_POTASSIUM_ION_TRANSPORT				1.368															2															FLNA;FHL1
GOBP_ODONTOGENESIS				1.405		2.124													3		4													COL1A1;COL1A2;LAMB1		COL1A1;COL1A2;LAMB1;SERPINE1
GOBP_ACTIVATION_OF_GTPASE_ACTIVITY												1.519															3															ARHGAP25;ARHGAP45;RASGRP1
GOBP_AROMATIC_AMINO_ACID_TRANSPORT														1.411															2															SLC7A8;SLC7A1
GOBP_GLIOGENESIS							1.844	1.98	2.308	2.463	1.792	2.591	2.252	1.873								6	8	8	8	6	7	7	10								C1QA;ANXA1;TLR2;IFNGR1;VIM;CXCR4	ANXA1;IFNGR1;S100A8;VIM;CSF1R;C1QA;S100A9;SRGAP2	SRGAP2;S100A8;VIM;S100A9;TLR2;CSF1R;IFNGR1;C1QA	TLR2;CSF1R;PRKCH;LYN;ANXA1;CXCR4;ADGRG1;VIM	CSF1R;ADGRG1;VIM;S100A8;S100A9;PRKCH	S100A9;VIM;PRKCH;CSF1R;TLR2;S100A8;ADGRG1	ADGRG1;ADGRG6;VIM;DLL1;LAMB2;ANXA1;APP	TAL1;SKI;LAMB2;ADGRG6;RELN;ADGRG1;TLR4;VIM;DLL1;APP
GOBP_SKELETAL_SYSTEM_DEVELOPMENT					1.503	1.566				1.663	2.497	1.918		1.772	1.444					7	6				9	10	8		14	12					COL1A1;SFRP1;COL1A2;MMP2;FBN1;COL3A1;MGP	COL1A2;FBN1;ENG;MGP;PTH1R;COL1A1				CD44;RPL13;PTPRC;TYROBP;PBXIP1;TGFBI;PIP4K2A;FGR;SEMA4D	KIT;MAF;PBXIP1;TGFBI;SEMA4D;RPL13;PTPRC;PIP4K2A;CD44;TYROBP	FGR;PBXIP1;PIP4K2A;KIT;TYROBP;PTPRC;TGFBI;SEMA4D		TAL1;ACVRL1;KDR;BMP4;MEF2C;SERPINH1;CHSY1;SKI;MGP;ANXA2;PCGF2;PAPSS2;COL3A1;MAF	MAF;MEF2C;TAL1;ETS2;ENG;ECM1;CHSY1;MGP;ACVRL1;ANXA2;COL3A1;KDR
GOBP_ENDOCHONDRAL_BONE_MORPHOGENESIS													1.792	1.65														3	4														COL3A1;SERPINH1;BMP4	MEF2C;SERPINH1;COL3A1;BMP4
GOBP_RECEPTOR_METABOLIC_PROCESS								2.612	2.928	1.807	1.481	2.287		1.318									7	7	5	4	5		6									LAPTM5;LGMN;RAB31;ARRB2;FCER1G;SYK;ITGB2	RAB31;LGMN;FCER1G;ARRB2;SYK;LAPTM5;ITGB2	FCER1G;SYK;LAPTM5;ITGB2;RAB31	SYK;RAB31;FCER1G;LAPTM5	SYK;ITGB2;LAPTM5;RAB31;FCER1G		CALCRL;ACKR3;RAMP2;EFNB2;ANXA2;CAV1
GOBP_POSITIVE_REGULATION_OF_INFLAMMATORY_RESPONSE									2.008	1.523		1.929												5	4		4												S100A8;S100A9;TLR2;PYCARD;LRRK2	ALOX5AP;TLR2;ETS1;RPS19		S100A9;TLR2;ALOX5AP;S100A8
GOBP_CALCITONIN_FAMILY_RECEPTOR_SIGNALING_PATHWAY														1.77	1.851														2	2														CALCRL;RAMP2	CALCRL;RAMP2
GOBP_POSITIVE_REGULATION_OF_PEPTIDYL_TYROSINE_PHOSPHORYLATION									1.539	4.279	3.213	2.811			1.331									5	9	7	6			6									HCLS1;CSF1R;ARRB2;SYK;IL6RA	CD44;CSF1R;PTPRC;SYK;HCLS1;NCF1;LYN;FYN;SEMA4D	CSF1R;KIT;SYK;SEMA4D;FYN;PTPRC;CD44	SYK;KIT;CSF1R;PTPRC;HCLS1;SEMA4D			ITGA5;PDGFB;PECAM1;EHD4;NEDD9;RELN
GOBP_MEMBRANE_RAFT_ASSEMBLY														2.623	1.625														3	2														CAV2;CAV1;ANXA2	CAV2;ANXA2
GOBP_POSITIVE_REGULATION_OF_NON_CANONICAL_WNT_SIGNALING_PATHWAY														1.318	1.391														2	2														DAB2;CSNK1E	DAB2;CSNK1E
GOBP_POSITIVE_REGULATION_OF_CELL_MIGRATION_INVOLVED_IN_SPROUTING_ANGIOGENESIS							1.617						2.49									2						3									ANXA1;HMOX1						RHOJ;HDAC7;ANXA1
GOBP_POSITIVE_REGULATION_OF_FC_RECEPTOR_MEDIATED_STIMULATORY_SIGNALING_PATHWAY										2.617															2															LYN;PTPRC
GOBP_T_HELPER_2_CELL_DIFFERENTIATION								1.661															2															ANXA1;CD86
GOBP_NEGATIVE_REGULATION_OF_EXTRINSIC_APOPTOTIC_SIGNALING_PATHWAY													1.412		2.356													3		6													ICAM1;ITGA6;BMP4		MAPK7;PEA15A;SERPINE1;NOS3;ICAM1;ITGA6
GOBP_CELLULAR_RESPONSE_TO_ABIOTIC_STIMULUS					1.388															5															MFAP4;COL1A1;SFRP1;MMP2;CRYAB
GOBP_REGULATION_OF_SUBSTRATE_ADHESION_DEPENDENT_CELL_SPREADING								1.489															3															DAB2;PREX1;LIMS1
GOBP_DEVELOPMENT_OF_PRIMARY_FEMALE_SEXUAL_CHARACTERISTICS											1.328															3															KIT;BCL2;ATM
GOBP_REGULATION_OF_CELLULAR_RESPONSE_TO_INSULIN_STIMULUS											1.78	1.942														3	3														PRKCQ;PRKCB;PIP4K2A	PRKCB;PIP4K2A;PRKCQ
GOBP_CHEMOKINE_C_X_C_MOTIF_LIGAND_2_PRODUCTION										1.856	1.973	2.124		1.318	1.391										2	2	2		2	2										KLF4;MBP	MBP;KLF4	MBP;KLF4		TLR4;KLF4	TLR4;KLF4
GOBP_POSITIVE_REGULATION_OF_LEUKOCYTE_DEGRANULATION								2.271	2.448	2.507		2.894											3	3	3		3											PTAFR;ITGB2;SYK	ITGB2;SYK;FGR	ITGB2;FGR;SYK		SYK;ITGB2;FGR
GOBP_REGULATION_OF_INOSITOL_PHOSPHATE_BIOSYNTHETIC_PROCESS							1.907	1.619														2	2														PLEK;PTAFR	PTAFR;PLEK
GOBP_POSITIVE_REGULATION_OF_PHOSPHOLIPASE_ACTIVITY								1.54															3															PTAFR;PLCB2;CD86
GOBP_NEGATIVE_REGULATION_OF_LEUKOCYTE_APOPTOTIC_PROCESS									1.802			2.241												3			3												AXL;HCLS1;MERTK			CCR5;HCLS1;PRKCQ
GOBP_AXIS_ELONGATION													1.515															2															SPRY1;BMP4
GOBP_POSITIVE_REGULATION_OF_NIK_NF_KAPPAB_SIGNALING							1.786	1.365														3	3														TLR2;LAPTM5;LIMS1	LAPTM5;CD86;LIMS1
GOBP_POSITIVE_REGULATION_OF_MOLECULAR_FUNCTION	1.5						4.017	5.05	6.66	3.984	3.834	6.172			2.035	18						22	31	32	25	22	25			28	IL1RAP;NLRP12;GHR;AR;CAMK1D;ARHGEF26;MAVS;CAT;LRP6;PDP2;RALGAPA2;FAM20A;ACSL1;FABP1;NOS1AP;STAT3;PROX1;SOD1						RGS10;SGK1;FGD2;FKBP1A;CYBA;PLEK;CTSH;TLR2;HCLS1;PRKCB;PTAFR;GNAI2;THBS1;AXL;NCKAP1L;PLCB2;KLF4;PREX1;LAPTM5;NFAM1;LIMS1;VSIR	PTAFR;VSIR;KLF4;CSF1R;RGS10;PYCARD;PLEK;MERTK;LAPTM5;RGL1;LRRK2;AXL;CTSH;SRGAP2;NCKAP1L;FGD2;GNAI2;CYBA;PLCB2;S100A9;SLC11A1;S100A8;LGMN;NFAM1;CCDC88A;LIMS1;PREX1;SYK;ITGB2;CD86;PRKCB	S100A9;CCDC88A;AXL;NCKAP1L;PLCB2;GNAI2;RGL1;PYCARD;LRRK2;SYK;CYBA;RGS10;SLC11A1;S100A8;NFAM1;PRKCB;TLR2;LGMN;HCLS1;SGK1;PILRB1;IL6RA;ITGB2;FGD2;SRGAP2;FGR;CSF1R;PREX1;MERTK;LAPTM5;VSIR;KLF4	ARHGAP25;ARHGAP45;TLR2;LAPTM5;FGR;SGK1;BCL2;MBP;CSF1R;CYFIP2;PLEK;CCND2;PRKCH;SYK;CCDC88A;HCLS1;NCF1;LYN;FYN;SEMA4D;PTPRC;SLC11A1;ITGB2;PRKCB;KLF4	KIT;CYFIP2;SYK;LCK;S100A8;CCDC88A;RASGRP1;PRKCB;PRKCQ;LAPTM5;PLEK;CCND2;KLF4;SEMA4D;FYN;MBP;PTPRC;S100A9;PRKCH;BCL2;CSF1R;ARHGAP25	SLC11A1;PRKCQ;CCDC88A;S100A9;CYFIP2;SYK;PRKCH;CSF1R;LAPTM5;LCK;ARHGAP45;ITGB2;KLF4;SGK1;PRKCB;HCLS1;FGR;KIT;SEMA4D;ARHGAP25;RASGRP1;MBP;TLR2;PTPRC;S100A8			UACA;PLXND1;CLDN5;ITGA6;ANXA2;RELN;MEF2C;PDGFB;SOX7;RAPGEF5;FLT4;TCIM;LGMN;ARAP3;CAV2;NOS3;FLT1;SGK1;KDR;GNAI2;TAL1;EPHB4;TIE1;TLR4;SHANK3;NEDD9;CNKSR3;KLF4
GOBP_NEGATIVE_REGULATION_OF_CELLULAR_COMPONENT_ORGANIZATION				1.419						1.487		1.421		1.649	1.636				7						10		8		16	15				FLNA;ITM2C;THBS1;THY1;SEMA5A;ANTXR1;VIM						TLR2;CORO1A;TMC8;ATM;VIM;FLNA;FYN;SEMA4D;EVL;MBP		ATM;VIM;CORO1A;TMC8;TLR2;MBP;EVL;SEMA4D		ACVRL1;DPYSL3;BMP4;ADD3;SEMA6A;APP;DAB2;EFNB2;TMSB10;TMOD3;ANXA2;RPS6KA2;DLC1;VIM;CAV1;SMAD6	DAB2;TMSB10;DPYSL3;SEMA6A;SEMA3F;RPS6KA2;VIM;CDH5;SOX7;SHANK3;SMAD6;ANXA2;ADD3;ACVRL1;MID1
GOBP_POSITIVE_REGULATION_OF_B_CELL_RECEPTOR_SIGNALING_PATHWAY							2.192	1.942	2.072	2.13	2.248	2.399										2	2	2	2	2	2										PRKCB;NFAM1	NFAM1;PRKCB	NFAM1;PRKCB	PRKCB;PRKCH	PRKCH;PRKCB	PRKCB;PRKCH
GOBP_POSITIVE_REGULATION_OF_ACTIN_FILAMENT_BUNDLE_ASSEMBLY										1.678	1.855														3	3														PLEK;EVL;CCDC88A	EVL;CCDC88A;PLEK
GOBP_AMYLOID_BETA_FORMATION
GOBP_NEGATIVE_REGULATION_OF_BINDING													1.525	1.863														4	7														ADAM15;ZFP462;PDGFB;NES	CSNK1E;ADAM15;DAB2;NES;PDGFB;ZFP462;CAV1
GOBP_PATTERN_SPECIFICATION_PROCESS													1.894		1.757													8		12													SPRY1;ADGRG1;BMP4;GJA1;ACVRL1;DLL1;SMAD6;SOX17		MEF2C;ETS2;SOX17;ENG;SEMA3F;CHSY1;DLL1;ADGRG1;SMAD6;RELN;ACVRL1;MID1
GOBP_NEGATIVE_REGULATION_OF_MYELOID_LEUKOCYTE_DIFFERENTIATION					1.31															2															FBN1;SFRP1
GOBP_REGULATION_OF_B_CELL_RECEPTOR_SIGNALING_PATHWAY							1.718	2.415	2.594	3.849	4.081	3.023										2	3	3	4	4	3										PRKCB;NFAM1	NFAM1;FCGR3;PRKCB	FCGR3;NFAM1;PRKCB	PRKCB;PTPN22;PRKCH;LYN	PRKCH;PTPN22;FCGR3;PRKCB	PRKCB;PTPN22;PRKCH
GOBP_INTERFERON_BETA_PRODUCTION									1.731															3															PYCARD;REL;TLR2
GOBP_MAST_CELL_MIGRATION												2.273															2															RAC2;KIT
GOBP_NEGATIVE_REGULATION_OF_MUSCLE_HYPERTROPHY					1.456	1.617														2	2														RGS4;IGFBP5	IGFBP5;RGS4
GOBP_AMYLOID_BETA_METABOLIC_PROCESS
GOBP_REGULATION_OF_ENDOCRINE_PROCESS						1.609															2															C1QTNF1;AGTR1A
GOBP_NEGATIVE_REGULATION_OF_INFLAMMATORY_RESPONSE_TO_ANTIGENIC_STIMULUS								2.115	3.387	3.461	2.523	2.741											3	4	4	3	3											HCK;FCGR3;SYK	HCK;FCGR3;SYK;FGR	FYN;FGR;LYN;SYK	SYK;FCGR3;FYN	HCK;SYK;FGR
GOBP_LYMPH_VESSEL_DEVELOPMENT													3.456	4.394	4.668													4	6	6													PTPN14;VASH1;TIE1;ACVRL1	ACVRL1;TIE1;EFNB2;CLEC14A;KDR;PTPN14	FLT4;TIE1;HEG1;ACVRL1;CLEC14A;KDR
GOBP_RESPONSE_TO_ESTRADIOL	1.47				1.888											4				4											SRD5A1;STAT3;CAT;APOB				MMP2;COL1A1;SFRP1;CRYAB
GOBP_POSITIVE_REGULATION_OF_PLASMA_MEMBRANE_BOUNDED_CELL_PROJECTION_ASSEMBLY												1.486	1.92	1.492													3	4	5													RAC2;KIT;CCDC88A	PALM;DPYSL3;GPM6A;CDC42EP3	DPYSL3;FSCN1;CDC42EP3;GPM6A;PALM
GOBP_MESENCHYMAL_CELL_DIFFERENTIATION				1.405	1.669								1.529	1.867	2.083				4	5								5	9	9				FLNA;COL1A1;SEMA5A;EDNRB	EDNRB;COL1A1;SFRP1;SEMA5A;FLNA								SPRY1;BMP4;ADAM15;TIAM1;ACVRL1	EDNRB;ACVRL1;BMP4;ADAM15;MEF2C;TGFBR3;DAB2;TIAM1;SEMA6A	WWTR1;MEF2C;DAB2;SEMA6A;ENG;SEMA3F;TGFBR3;ADAM15;ACVRL1
GOBP_NEGATIVE_REGULATION_OF_MIRNA_TRANSCRIPTION													1.698															2															BMP4;PDGFB
GOBP_REGULATION_OF_SYNCYTIUM_FORMATION_BY_PLASMA_MEMBRANE_FUSION							1.543			1.427	1.545	1.672										2			2	2	2										TYROBP;PLEKHO1			CD53;TYROBP	CD53;TYROBP	TYROBP;CD53
GOBP_SECOND_MESSENGER_MEDIATED_SIGNALING										1.474	1.303	1.474		1.504											6	5	5		9											PTPRC;SYK;RCAN3;CXCR4;PLEK;CCR5	SYK;PLEK;PTPRC;CCR5;RCAN3	RCAN3;FPR1;SYK;PTPRC;CCR5		EDNRB;CDH13;SELP;NPR1;MAPK7;ADGRG6;ACKR3;VCAM1;KDR
GOBP_POSITIVE_REGULATION_OF_MAP_KINASE_ACTIVITY											1.888	2.086														4	4														SYK;KIT;PTPRC;RASGRP1	KIT;SYK;RASGRP1;PTPRC
GOBP_ZINC_ION_HOMEOSTASIS									1.308		2.463	3.866												2		3	4												S100A8;S100A9		LCK;S100A8;S100A9	S100A9;TMC8;S100A8;LCK
GOBP_EMBRYO_IMPLANTATION				2.172	1.965	1.374													3	3	2													FBLN1;MMP2;IGFBP7	MMP2;IGFBP7;FBLN1	FBLN1;IGFBP7
GOBP_REGULATION_OF_PIGMENTATION											2.018			1.359												2			2												ZEB2;BCL2			ZEB2;ADAMTS9
GOBP_CELL_MORPHOGENESIS_INVOLVED_IN_DIFFERENTIATION				2.577	2.443	1.88		1.408						1.689	2.641				10	11	8		12						17	19				FBLN1;LAMC1;FLNA;NOTCH3;SEMA5A;THY1;ANTXR1;ENAH;ITGA8;LAMB1	ANTXR1;LAMC1;LAMB1;FBLN1;SEMA5A;FLNA;ITGA8;NOTCH3;THY1;ENAH;ACTN1	LAMC1;THY1;ACTN1;ITGA8;NOTCH3;LAMB1;ANTXR1;FBLN1		S100A6;DAB2;CSF1R;LIMS1;PARVG;SPI1;PREX1;MEGF9;MERTK;LRRK2;AXL;SRGAP2						TAL1;SPRY4;MEF2C;PREX2;LAMB2;RELN;APP;DAB2;EFNB2;TIAM1;PTPRM;TEK;KLF7;ACTN1;EPHB4;HECW2;SEMA6A	KLF7;PLXND1;HEG1;RELN;MEF2C;SEMA6A;ROBO4;PTPRM;NEDD9;DAB2;TAL1;EPHB4;SOX17;SEMA3F;ACTN1;SHANK3;PXN;PREX2;PEAK1
GOBP_FORMATION_OF_PRIMARY_GERM_LAYER				4.882	3.384	3.073							3.214	1.772	2.522				7	6	5							6	6	7				COL4A2;MMP2;KLF4;COL6A1;ITGA8;LAMB1;COL5A1	KLF4;LAMB1;ITGA8;MMP2;COL6A1;COL5A1	COL6A1;ITGA8;COL5A1;LAMB1;KLF4							COL4A2;BMP4;GJA1;KLF4;COL8A1;SOX17	TAL1;BMP4;KDM6B;DUSP5;COL8A1;KLF4	ITGA5;TAL1;ETS2;SOX17;KDM6B;SOX7;KLF4
GOBP_REGULATION_OF_POSTSYNAPSE_ORGANIZATION											1.583				1.402											3				4											SRGN;FCGR3;FYN				SEMA3F;RELN;SHANK3;FCGR3
GOBP_RESPONSE_TO_ALCOHOL	1.645		1.885				1.642		1.701	2.954	2.13	3.032			1.365	6		6				5		6	8	6	7			7	HMGCS2;HAMP;CAT;LRP6;SOD1;H6PD		HMGCS2;LRP6;CAT;H6PD;CYP8B1;ABAT				CYBB;SGK1;TBXAS1;VCAM1;CYBA		TBXAS1;VCAM1;CYBB;S100A8;SGK1;CYBA	RPL27;CYBB;GNG2;KLF2;SGK1;PTGER2;CCR5;FYN	CYBB;KLF2;FYN;GNG2;S100A8;CCR5	GNG2;SGK1;CYBB;S100A8;PTGER2;CCR5;KLF2			TGFBR3;KLF2;ADAM15;SGK1;CLDN5;IGFBP7;VCAM1
GOBP_POSITIVE_REGULATION_OF_INTERLEUKIN_10_PRODUCTION							1.375	1.842	2.012	3.078	2.263	2.454										2	3	3	4	3	3										TLR2;CD83	PYCARD;CD83;SYK	PYCARD;TLR2;SYK	SASH3;TLR2;SYK;CD83	SYK;CD83;SASH3	TLR2;SYK;SASH3
GOBP_POSITIVE_REGULATION_OF_CELL_CYCLE_G1_S_PHASE_TRANSITION										1.678															3															CCND2;AIF1;ANXA1
GOBP_NEGATIVE_REGULATION_OF_T_CELL_DIFFERENTIATION							1.32															2															FGL2;ANXA1
GOBP_ACTOMYOSIN_STRUCTURE_ORGANIZATION					1.444			1.744	1.482											4			6	5											MYL9;SFRP1;TPM1;MYH11			CCDC88A;MYH11;WAS;EPB41L2;EPB41L3;WASF2	WAS;CCDC88A;EPB41L3;ARHGEF10L;MYH11
GOBP_RESPIRATORY_BURST_INVOLVED_IN_DEFENSE_RESPONSE										1.856															2															RPS19;NCF1
GOBP_PIGMENTATION					1.448						1.377									3						3									EDNRB;CD63;TBX2						ZEB2;KIT;BCL2
GOBP_PSEUDOPODIUM_ORGANIZATION								1.711															2															SRGAP2;CDC42EP3
GOBP_PEPTIDE_METABOLIC_PROCESS										2.494															14															RPS19;RPL13;RPL10A;BTG2;RPLP2;RPL27;RPS18;RPS14;RPL27A;RPS15A;VIM;RPL18;RPS12;PABPC4
GOBP_REGULATION_OF_WNT_SIGNALING_PATHWAY														1.632															10															CSNK1E;TCF7L1;SKI;DAB2;TIAM1;ZEB2;GRB10;RBMS3;CAV1;APP
GOBP_CELL_CELL_ADHESION_VIA_PLASMA_MEMBRANE_ADHESION_MOLECULES							1.478							2.99	5.255							5							12	15							IL1RN;CD84;VCAM1;KLF4;SELL							CDH13;SELP;CLDN5;MAPK7;PCDH17;SPARCL1;ESAM;PECAM1;KLF4;PTPRM;PCDH12;VCAM1	PCDH17;MAPK7;ITGA5;ESAM;CDH13;SELP;PECAM1;ICAM1;ROBO4;KLF4;CDH5;PTPRM;CLDN5;PCDH12;VCAM1
GOBP_NEGATIVE_REGULATION_OF_CELL_JUNCTION_ASSEMBLY							1.499															2															TLR2;THBS1
GOBP_REGULATION_OF_GAMMA_DELTA_T_CELL_DIFFERENTIATION								2.018	2.144	3.654	3.802	4.042											2	2	3	3	3											SYK;NCKAP1L	NCKAP1L;SYK	TCF7;SYK;PTPRC	SYK;TCF7;PTPRC	TCF7;SYK;PTPRC
GOBP_ANTIGEN_PROCESSING_AND_PRESENTATION_OF_PEPTIDE_ANTIGEN								3.651	3.926		1.314	1.421											5	5		2	2											LGMN;FCGR3;PYCARD;FCER1G;SLC11A1	FCGR3;SLC11A1;LGMN;FCER1G;PYCARD		FCER1G;FCGR3	FCER1G;SLC11A1
GOBP_SEMAPHORIN_PLEXIN_SIGNALING_PATHWAY				1.429	1.337										1.391				2	2										3				FLNA;SEMA5A	SEMA5A;FLNA										SEMA6A;SEMA3F;PLXND1
GOBP_POSITIVE_REGULATION_OF_LYMPHOCYTE_DIFFERENTIATION							2.711	3.651	1.694	2.468	3.598	3.011										5	7	4	5	6	5										CD83;ANXA1;NCKAP1L;AXL;VSIR	ANXA1;VSIR;NCKAP1L;CD83;SYK;AXL;CD86	AXL;NCKAP1L;VSIR;SYK	PTPRC;SASH3;SYK;ANXA1;CD83	CD83;RASGRP1;SYK;PTPRC;TOX;SASH3	SYK;RASGRP1;SASH3;PTPRC;TOX
GOBP_REGULATION_OF_ALPHA_BETA_T_CELL_ACTIVATION							2.109	3.017	1.788	3.428	3.749	3.149										4	6	4	6	6	5										NCKAP1L;CD83;ANXA1;VSIR	ANXA1;VSIR;NCKAP1L;CD83;SYK;CD86	VSIR;NCKAP1L;CD55;SYK	PTPRC;SYK;SASH3;ANXA1;CD83;PTPN22	CD83;SYK;PRKCQ;PTPN22;PTPRC;SASH3	PTPN22;PRKCQ;SYK;SASH3;PTPRC
GOBP_REGULATION_OF_T_CELL_ACTIVATION							2.711	6.058	4.553	7.015	9.985	8.714										8	15	12	15	17	15										ICOSL;CD83;FGL2;LAPTM5;ANXA1;VCAM1;NCKAP1L;VSIR	ANXA1;MAP3K8;VSIR;LAPTM5;NCKAP1L;CD83;FCGR3;FGL2;PYCARD;SYK;AIF1;VSIG4;VCAM1;ICOSL;CD86	FCGR3;VCAM1;CD55;AIF1;ICOSL;PYCARD;NCKAP1L;SYK;FGL2;VSIG4;LAPTM5;VSIR	PTPN22;PTPRC;CORO1A;TCF7;RAC2;SASH3;SYK;LAPTM5;FGL2;KLRK1;LYN;ANXA1;CD83;FYN;AIF1	CD83;TOX;RASGRP1;LAPTM5;CORO1A;SYK;TCF7;LCK;FCGR3;FYN;PRKCQ;PTPN22;PTPRC;AIF1;KLRK1;FGL2;SASH3	AIF1;PTPN22;RAC2;PRKCQ;SYK;RASGRP1;FGL2;CORO1A;SASH3;LAPTM5;PTPRC;LCK;KLRK1;TCF7;TOX
GOBP_REGULATION_OF_LEUKOCYTE_ADHESION_TO_VASCULAR_ENDOTHELIAL_CELL							1.478	2.018		2.27	1.481	1.6										2	3		3	2	2										KLF4;PTAFR	PTAFR;KLF4;ITGB2		KLF4;ITGB2;ETS1	ETS1;KLF4	KLF4;ITGB2
GOBP_POSITIVE_REGULATION_OF_B_CELL_ACTIVATION										2.7	2.976	2.388													5	5	4													PTPRC;SASH3;SYK;SH3KBP1;BCL2	SH3KBP1;SYK;PTPRC;SASH3;BCL2	PTPRC;SYK;SASH3;SH3KBP1
GOBP_NEURON_DEVELOPMENT				2.268	2.057				1.482	2.011	1.97	1.995		1.459					12	13				15	16	14	13		22					MMP2;FLNA;KLF4;ITM2C;NOTCH3;SEMA5A;THY1;ENAH;LAMB1;VIM;PRKG1;EDNRB	EDNRB;VIM;SFRP1;KLF4;LAMB1;SEMA5A;FLNA;NOTCH3;MMP2;THY1;ENAH;ITM2C;PRKG1				SRGAP2;VIM;S100A9;CCDC88A;EPB41L3;S100A6;CSF1R;PPT1;DAB2;NCKAP1L;LRRK2;SGK1;C1QA;LST1;KLF4	KLF4;CSF1R;BTG2;RAC2;CCDC88A;LST1;LYN;SGK1;CXCR4;VIM;CYFIP2;FLNA;FYN;SEMA4D;BCL2;MBP	CSF1R;CCDC88A;CYFIP2;FLNA;VIM;KLF4;SEMA4D;FYN;PRKCQ;GPRIN3;MBP;S100A9;TOX;BCL2	RAC2;PRKCQ;CCDC88A;S100A9;CYFIP2;VIM;CSF1R;KLF4;SGK1;MBP;LST1;TOX;SEMA4D		UGCG;ITGA6;MEF2C;PREX2;EFNB2;TIAM1;KLF7;GPM6A;DPYSL3;RELN;KLF4;EPHB4;APP;DAB2;PTPRM;PCDH12;VIM;HECW2;SEMA6A;EDNRB;LAMB2;NRN1
GOBP_NEGATIVE_REGULATION_OF_CELLULAR_RESPONSE_TO_INSULIN_STIMULUS											2.294	2.481														3	3														PRKCQ;PRKCB;PIP4K2A	PRKCB;PIP4K2A;PRKCQ
GOBP_PIGMENT_GRANULE_ORGANIZATION											1.565															2															ZEB2;BCL2
GOBP_CARDIAC_CHAMBER_MORPHOGENESIS						2.144							1.726	2.214	2.437						4							4	7	7						TBX2;TPM1;ENG;ADAMTS1							BMP4;FKBP1A;ADGRG6;SMAD6	BMP4;MEF2C;ADGRG6;TGFBR3;TEK;CPE;SMAD6	MEF2C;ENG;TGFBR3;NOS3;HEG1;SMAD6;ADAMTS1
GOBP_REGULATION_OF_LEUKOCYTE_DIFFERENTIATION							4.307	4.512	3.639	3.811	4.367	4.061										10	12	10	10	10	9										CD83;FGL2;ANXA1;NFAM1;HCLS1;C1QC;AXL;TYROBP;NCKAP1L;VSIR	ANXA1;VSIR;NCKAP1L;NFAM1;CD83;FCGR3;FGL2;C1QC;SYK;TYROBP;AXL;CD86	FCGR3;NFAM1;TYROBP;HCLS1;AXL;C1QC;NCKAP1L;SYK;FGL2;VSIR	PTPRC;TCF7;TYROBP;SYK;SASH3;HCLS1;FGL2;LYN;ANXA1;CD83	CD83;RASGRP1;SYK;TCF7;TYROBP;FCGR3;PTPRC;TOX;FGL2;SASH3	SYK;RASGRP1;SASH3;FGL2;TYROBP;PTPRC;TCF7;HCLS1;TOX
GOBP_REGULATION_OF_GROWTH					2.31				1.394			1.499	2.425	1.504	1.496					10				10			8	11	15	14					SFRP1;FBLN5;TBX2;LTBP4;SEMA5A;RGS4;FHL1;IGFBP7;CRYAB;IGFBP5				JARID2;S100A8;S100A9;BASP1;EPB41L3;PPT1;LGMN;DAB2;SGK1;CYBA			PRKCQ;S100A9;SASH3;TMC8;SGK1;S100A8;JARID2;SEMA4D	SGK1;BMP4;ADAM15;GJA1;IGFBP7;DLL1;LTBP4;ACVRL1;NEDD9;APP;SOX17	ACVRL1;NPR1;BMP4;ADAM15;MEF2C;TGFBR3;APP;IGFBP7;PLAC8;DAB2;FHL1;YBX3;LTBP4;DLL1;SEMA6A	MEF2C;DAB2;SEMA6A;SOX17;LGMN;SEMA3F;PLAC8;TGFBR3;DLL1;SGK1;ADAM15;ACVRL1;IGFBP7;NEDD9
GOBP_CELLULAR_EXTRAVASATION							1.742								2.951							3								6							VCAM1;PTAFR;SELL								PLVAP;SELP;PECAM1;ICAM1;JAM2;VCAM1
GOBP_STRIATED_MUSCLE_CELL_DIFFERENTIATION					1.523	1.892							1.377	2.389						5	5							5	11						IGFBP5;MYH11;TPM1;MYL9;RGS4	IGFBP5;RGS4;MYH11;CSRP1;TPM1							BMP4;DLL1;CSRP1;EHD2;SELENON	BMP4;KDM6B;MEF2C;SKI;EHD2;EFNB2;CAV2;TMOD3;PGM5;SELENON;DLL1
GOBP_AMYLOID_PRECURSOR_PROTEIN_CATABOLIC_PROCESS							1.872															3															IFNGR1;RTN1;FKBP1A
GOBP_PYRIDINE_CONTAINING_COMPOUND_BIOSYNTHETIC_PROCESS													1.441															2															PTGIS;NAMPT
GOBP_DEVELOPMENTAL_GROWTH													1.634															9															SPRY1;BMP4;ADAM15;GJA1;DLL1;LAMB2;ANXA1;COL3A1;APP
GOBP_DETECTION_OF_STIMULUS_INVOLVED_IN_SENSORY_PERCEPTION_OF_PAIN										1.519															2															FYN;CXCR4
GOBP_REGULATION_OF_LYMPHOCYTE_DIFFERENTIATION							3.348	3.887	2.185	2.963	4.121	3.712										7	9	6	7	8	7										CD83;FGL2;ANXA1;NFAM1;NCKAP1L;AXL;VSIR	ANXA1;VSIR;NCKAP1L;NFAM1;CD83;FGL2;SYK;AXL;CD86	NFAM1;AXL;NCKAP1L;SYK;FGL2;VSIR	PTPRC;TCF7;SYK;SASH3;FGL2;ANXA1;CD83	CD83;RASGRP1;SYK;TCF7;PTPRC;TOX;FGL2;SASH3	SYK;RASGRP1;SASH3;FGL2;PTPRC;TCF7;TOX
GOBP_MHC_CLASS_II_BIOSYNTHETIC_PROCESS								1.711	1.832														2	2														SPI1;SLC11A1	SLC11A1;SPI1
GOBP_LIPOPROTEIN_LOCALIZATION									1.671															2															MSR1;PRKCB
GOBP_MESENCHYME_MORPHOGENESIS						1.324															2															TBX2;ENG
GOBP_CARDIOCYTE_DIFFERENTIATION						2.006							1.553	1.905	2.09						4							4	7	7						TBX2;MYH11;ENG;RGS4							BMP4;SPRY1;DLL1;SOX17	BMP4;KDM6B;MEF2C;TGFBR3;EFNB2;VCAM1;DLL1	MEF2C;SOX17;ENG;KDM6B;TGFBR3;DLL1;VCAM1
GOBP_REGULATION_OF_FC_RECEPTOR_MEDIATED_STIMULATORY_SIGNALING_PATHWAY										2.13															2															LYN;PTPRC
GOBP_CELL_PROJECTION_ASSEMBLY								1.344					1.524										10					8										NCKAP1L;FGD2;RAP2B;SRGAP2;CCDC88A;WAS;PARVG;AIF1;WASF2;CDC42EP3					PALM;GPM6A;EMP1;RHOJ;CDC42EP3;ICAM1;DPYSL3;EHD2
GOBP_REGULATION_OF_ENDOTHELIAL_CELL_DEVELOPMENT															1.331															2															CDH5;CLDN5
GOBP_REGULATION_OF_RESPONSE_TO_BIOTIC_STIMULUS								4.59	5.172	3.985	4.587	3.658											13	13	11	11	9											FCGR3;FGL2;CYBA;ARRB2;IFI205;PYCARD;SPI1;LY86;TYROBP;HCK;SAMHD1;SYK;VSIG4	FCGR3;LY86;CD55;FGR;TYROBP;PYCARD;ARRB2;SYK;FGL2;VSIG4;HCK;CYBA;SPI1	PTPN22;RPS19;TYROBP;TNFAIP3;SYK;FGL2;NCF1;KLRK1;FGR;LYN;FYN	SAMHD1;RASGRP1;KLRK1;SYK;TYROBP;IFI205;FCGR3;FYN;PTPN22;GBP5;FGL2	HCK;PTPN22;FGR;TNFAIP3;SYK;RASGRP1;FGL2;TYROBP;KLRK1
GOBP_ENDOCARDIAL_CUSHION_DEVELOPMENT						1.41															2															TBX2;ENG
GOBP_MUSCLE_CELL_DIFFERENTIATION				1.386	3.085	3.964							1.396	3.183	1.854				5	9	9							6	15	11				IGFBP5;TPM1;ITGA8;CSRP1;EDNRB	EDNRB;MYH11;TBX2;RGS4;ITGA8;TPM1;MYL9;IGFBP5;ACTN1	IGFBP5;RGS4;ENG;ACTN1;ITGA8;TBX2;MYH11;CSRP1;TPM1							BMP4;DLL1;CSRP1;EHD2;SELENON;PDGFB	EDNRB;BMP4;KDM6B;MEF2C;SKI;EHD2;RAMP2;EFNB2;CAV2;TMOD3;PGM5;SELENON;PDGFB;ACTN1;DLL1	MEF2C;RAMP2;PDGFB;CSRP1;ENG;ACTN1;KDM6B;SELENON;CAV2;DLL1;JAM2
GOBP_MEMBRANE_ORGANIZATION							1.783	3.555	3.76	3.573	3.339	3.86										10	18	17	16	14	14										LPCAT2;PRKCB;NPC2;LAPTM5;ANXA1;THBS1;RAB31;NCKAP1L;CXCR4;PPT1	ANXA1;FOLR2;GZMB;LAPTM5;NCKAP1L;CCDC88A;STX7;NPC2;FCGR3;RAB31;S100A9;AIF1;GCA;EPB41L3;ITGB2;LPCAT2;PPT1;PRKCB	RAB31;FCGR3;GCA;PRKCB;S100A9;AIF1;CCDC88A;MARCO;EPB41L3;PPT1;NPC2;NCKAP1L;MSR1;FOLR2;LAPTM5;ITGB2;LPCAT2	ARHGAP25;PTPRC;CORO1A;RAC2;CCDC88A;LAPTM5;PIP4K2A;MBP;ITGB2;RAB31;ANXA1;CXCR4;PRKCB;AIF1;BCL2;NPC2	CCDC88A;PRKCB;CORO1A;RAB31;ARHGAP25;FCGR3;MBP;PTPRC;PIP4K2A;AIF1;S100A9;GZMB;LAPTM5;BCL2	AIF1;ARHGAP25;RAC2;CCDC88A;S100A9;BIN2;PIP4K2A;ITGB2;CORO1A;MBP;LAPTM5;PTPRC;PRKCB;RAB31
GOBP_SULFUR_AMINO_ACID_BIOSYNTHETIC_PROCESS	1.637															2															ADI1;BHMT
GOBP_POSITIVE_REGULATION_OF_NEUROGENESIS										1.411		1.31													5		4													TLR2;PRKCH;LYN;CXCR4;SEMA4D		TLR2;PRKCH;KIT;SEMA4D
GOBP_PROSTANOID_BIOSYNTHETIC_PROCESS							1.52						1.454									2						2									TBXAS1;ANXA1						PTGIS;ANXA1
GOBP_CELL_CELL_ADHESION_INVOLVED_IN_GASTRULATION							2.144			2.062	2.184	2.333		1.504	1.572							2			2	2	2		2	2							IL1RN;KLF4			KLF4;MBP	MBP;KLF4	MBP;KLF4		MAPK7;KLF4	MAPK7;KLF4
GOBP_NEGATIVE_REGULATION_OF_ALPHA_BETA_T_CELL_ACTIVATION							1.391															2															ANXA1;VSIR
GOBP_REGULATION_OF_SYSTEM_PROCESS				1.313	2.17	1.462													6	9	6													MMP2;FLNA;IGFBP5;TPM1;PRKG1;EDNRB	EDNRB;TBX2;FLNA;RGS4;MMP2;TPM1;MYL9;IGFBP5;PRKG1	IGFBP5;C1QTNF1;RGS4;AGTR1A;TBX2;TPM1
GOBP_REGULATION_OF_VESICLE_FUSION										1.599			1.616												2			2												CORO1A;ANXA1			ANXA1;ANXA2
GOBP_REGULATION_OF_EXOCYTOSIS							3.009	4.936	4.648	2.649		2.004										7	11	10	7		5										PRKCB;PTAFR;ANXA1;GNAI2;CD84;HMOX1;NCKAP1L	ANXA1;PTAFR;NCKAP1L;FCGR3;GNAI2;LRRK2;SPI1;SYK;CD84;ITGB2;PRKCB	FCGR3;PRKCB;FGR;SPI1;NCKAP1L;LRRK2;SYK;ITGB2;CD84;GNAI2	RAC2;SYK;ITGB2;FGR;LYN;ANXA1;PRKCB		FGR;RAC2;SYK;ITGB2;PRKCB
GOBP_ANTIGEN_PROCESSING_AND_PRESENTATION_OF_EXOGENOUS_PEPTIDE_ANTIGEN_VIA_MHC_CLASS_II								2.634	2.808		1.856												3	3		2												FCER1G;FCGR3;LGMN	FCGR3;LGMN;FCER1G		FCER1G;FCGR3
GOBP_POSITIVE_REGULATION_OF_CELL_DEVELOPMENT							1.338			2.39	1.743	1.456										5			8	6	5										TLR2;TYROBP;CXCR4;PREX1;LIMS1			TLR2;TYROBP;PRKCH;LYN;CXCR4;FLNA;SEMA4D;BCL2	KIT;FLNA;TYROBP;SEMA4D;PRKCH;BCL2	KIT;PRKCH;TYROBP;TLR2;SEMA4D
GOBP_REGULATION_OF_LYMPHOCYTE_ACTIVATION							4.112	8.364	7.785	10.7	12.406	12.318										12	21	19	22	22	21										ICOSL;CD83;FGL2;LAPTM5;LST1;ANXA1;VCAM1;NFAM1;NCKAP1L;AXL;TYROBP;VSIR	VSIR;FCGR3;FGL2;PYCARD;VSIG4;MERTK;MAP3K8;LAPTM5;IFI205;AIF1;THEMIS2;AXL;ANXA1;NCKAP1L;CD83;ICOSL;VCAM1;NFAM1;SYK;TYROBP;CD86	VCAM1;CD55;AXL;ICOSL;NCKAP1L;FCGR3;AIF1;PYCARD;SYK;NFAM1;THEMIS2;FGR;TYROBP;FGL2;LST1;LAPTM5;MERTK;VSIG4;VSIR	LAPTM5;FGR;PTPN22;AIF1;BCL2;TCF7;RAC2;TYROBP;TNFAIP3;FGL2;ANXA1;CD83;LST1;CORO1A;SASH3;SYK;ATM;KLRK1;LYN;FYN;PTPRC;SH3KBP1	CD83;SYK;LCK;IFI205;FCGR3;PTPN22;AIF1;TOX;RASGRP1;CORO1A;PRKCQ;LAPTM5;KLRK1;SASH3;SH3KBP1;FYN;PTPRC;BCL2;TYROBP;TCF7;ATM;FGL2	PRKCQ;SYK;SH3KBP1;LAPTM5;LCK;TCF7;AIF1;RAC2;FGL2;CORO1A;KLRK1;LST1;FGR;SASH3;TOX;PTPN22;ATM;TNFAIP3;RASGRP1;TYROBP;PTPRC
GOBP_RESPONSE_TO_ENDOGENOUS_STIMULUS	1.74			3.804	3.133	1.722	3.704	3.78	3.992	5.83	3.53	3.8	4.229	3.21	3.346	20			18	19	12	22	29	27	30	22	21	23	36	34	AR;SRD5A1;ABCA1;SOD1;FGB;TAT;LRG1;GRB14;GHR;ONECUT2;CAT;LRP6;APOA2;APOB;HMGCS2;ERRFI1;ACSL1;ANGPTL3;STAT3;IDH1			COL4A2;COL1A1;MMP2;IGFBP7;FBN1;FLNA;TIMP2;COL1A2;LTBP4;COL6A1;IGFBP5;THBS1;FSTL1;ITGA8;VIM;COL3A1;COL4A1;EDNRB	EDNRB;SFRP1;FLNA;LTBP4;ITGA8;MMP2;FBN1;COL3A1;IGFBP5;FSTL1;COL1A1;COL1A2;IGFBP7;COL6A1;RGS4;TIMP2;VIM;FOS;TBX2	IGFBP5;COL1A2;FBN1;RGS4;ENG;COL6A1;ITGA8;AGTR1A;TBX2;VIM;IGFBP7;COL1A1	ARPC1B;IL1RN;SGK1;FKBP1A;CYBA;VIM;CTSH;ANXA1;TLR2;VCAM1;HCLS1;PRKCB;CTSB;CYBB;NAMPT;PKM;PTAFR;GNAI2;HMOX1;THBS1;RAB31;LIMS1	PTAFR;FCGR3;UCP2;SPI1;CD44;PKM;ARPC1B;ARRB2;FCER1G;AIF1;NAMPT;LRRK2;CTSH;ANXA1;CTSB;FOLR2;RAB31;GNAI2;CYBA;VCAM1;VIM;LGMN;DAB2;CYBB;LIMS1;SYK;ZEB2;ITGB2;PRKCB	VCAM1;VIM;ARRB2;DAB2;ZEB2;GNAI2;FCGR3;AIF1;PKM;LRRK2;SYK;CYBA;ARPC1B;RAB31;PRKCB;NAMPT;TLR2;LGMN;HCLS1;FCER1G;SGK1;FOLR2;ITGB2;CYBB;UCP2;CTSB;SPI1	TLR2;NFKB1;CYBB;SGK1;PTPN22;AIF1;BCL2;MBP;CD44;BTG2;BTG1;PIP4K2A;KLF2;LEPROTL1;ANXA1;FLNA;VIM;RPL27;SESN1;CORO1A;GNG2;SYK;HCLS1;LYN;PTGER2;FYN;FCER1G;ITGB2;RAB31;PRKCB	KIT;SYK;FCER1G;KLF2;FCGR3;ZEB2;PTPN22;GNG2;AIF1;CYBB;PRKCB;CORO1A;SESN1;PRKCQ;PIP4K2A;FLNA;FYN;MBP;BCL2;RAB31;VIM;CD44	PRKCQ;SYK;RAB31;AIF1;GNG2;PIP4K2A;ITGB2;CORO1A;SGK1;PRKCB;HCLS1;FCER1G;KIT;PTGER2;KLF2;ZEB2;PTPN22;VIM;MBP;CYBB;TLR2	COL4A2;GJA1;ICAM1;ACVRL1;COL3A1;LMO2;APP;NAMPT;GRB10;IGFBP7;FKBP1A;SOGA1;LTBP4;PALM;SPRY1;COL4A1;SGK1;BMP4;VIM;TIMP2;SMAD6;ANXA1;PDGFB	UGCG;ACVRL1;MEF2C;NAMPT;TGFBR3;VCAM1;PDGFB;BMP4;COL3A1;IGFBP7;CAV2;KDR;LMO2;APP;SMAD6;CDH13;SPRY4;TFPI;PRCP;SKI;RAMP2;DAB2;ZEB2;GRB10;VIM;LTBP4;CAV1;TIMP2;EDNRB;KLF2;PLPP1;CLDN5;MAPK7;TLR4;FCGR3;PALM	NAMPT;PXN;CLDN5;MYO1C;SMAD6;ACVRL1;MEF2C;MAPK7;COL3A1;CDH13;PDGFB;PRCP;AQP1;RAMP2;LGMN;ENG;TGFBR3;CAV2;NOS3;SGK1;ICAM1;VCAM1;KDR;GNAI2;DAB2;SOGA1;ZEB2;KLF2;TLR4;VIM;CDH5;FCGR3;IGFBP7;TFPI
GOBP_CGMP_MEDIATED_SIGNALING				2.646	1.492														3	2														THBS1;PRKG1;EDNRB	EDNRB;PRKG1
GOBP_MACROPHAGE_DIFFERENTIATION							2.077	1.661	3.755	1.9		2.259										3	3	5	3		3										TLR2;HCLS1;C1QC	SPI1;C1QC;CSF1R	TLR2;HCLS1;C1QC;CSF1R;SPI1	HCLS1;TLR2;CSF1R		TLR2;HCLS1;CSF1R
GOBP_ANGIOGENESIS_INVOLVED_IN_WOUND_HEALING						1.765				1.467				1.684	2.672						2				2				3	4						MCAM;SERPINE1				TNFAIP3;CXCR4				KDR;PRCP;CD34	SERPINE1;PRCP;MCAM;KDR
GOBP_CELLULAR_RESPONSE_TO_NITROGEN_COMPOUND				2.723	2.6	1.995	2.365	4.024	4.211	3.473	3.697	2.192	1.894		1.901				10	11	8	11	18	17	15	14	10	10		16				COL1A1;MMP2;FBN1;FLNA;COL1A2;COL6A1;IGFBP5;VIM;COL3A1;COL4A1	COL1A1;VIM;SFRP1;FLNA;RGS4;COL1A2;MMP2;FBN1;COL6A1;COL3A1;IGFBP5	IGFBP5;COL1A2;FBN1;RGS4;COL6A1;AGTR1A;VIM;COL1A1	PRKCB;CYBB;NAMPT;RGS10;PKM;PTAFR;GNAI2;VCAM1;CYBA;RAB31;VIM	PTAFR;FOLR2;VIM;LGMN;PKM;RGS10;FCGR3;GNAI2;ARRB2;RAB31;CYBB;UCP2;CYBA;LRRK2;AIF1;NAMPT;VCAM1;PRKCB	RAB31;FCGR3;VCAM1;CYBB;VIM;AIF1;PRKCB;NAMPT;LGMN;UCP2;ARRB2;PKM;LRRK2;FOLR2;CYBA;RGS10;GNAI2	PTPN22;NFKB1;SESN1;CYBB;GNG2;PIP4K2A;KLF2;RAB31;LEPROTL1;LYN;AIF1;PRKCB;FLNA;FYN;VIM	CYBB;PRKCB;FLNA;RAB31;KLF2;FCGR3;VIM;FYN;SESN1;PTPN22;PRKCQ;GNG2;PIP4K2A;AIF1	AIF1;GNG2;PTPN22;PRKCQ;VIM;PIP4K2A;CYBB;PRKCB;RAB31;KLF2	PALM;COL4A1;NAMPT;VIM;SOGA1;GJA1;GRB10;ICAM1;COL3A1;APP		NAMPT;GNAI2;MEF2C;SOGA1;LGMN;KLF2;TLR4;VIM;CAV2;FCGR3;ICAM1;MYO1C;PXN;COL3A1;VCAM1;AQP1
GOBP_POSITIVE_REGULATION_OF_TELOMERASE_ACTIVITY											1.442	1.555														2	2														PRKCQ;KLF4	KLF4;PRKCQ
GOBP_MYOTUBE_DIFFERENTIATION														1.312															5															MEF2C;SKI;EHD2;CAV2;SELENON
GOBP_REGULATION_OF_RESPONSE_TO_STRESS								1.893	2.168	6.439	5.165	3.917		1.58	1.332								20	19	28	23	19		25	22								KLF4;FCGR3;FGL2;PYCARD;SPI1;CD44;VSIG4;ARRB2;IFI205;LRRK2;ANXA1;CYBA;HCK;S100A9;S100A8;SAMHD1;WAS;SYK;TYROBP;METRNL	WAS;S100A9;ARRB2;HCK;FCGR3;PYCARD;IER5;LRRK2;SYK;CYBA;GADD45B;S100A8;TLR2;FGR;TYROBP;FGL2;VSIG4;KLF4;SPI1	ETS1;TLR2;AOAH;NFKB1;ALOX5AP;FGR;CXCR4;PTPN22;BCL2;CD44;TYROBP;TNFAIP3;FGL2;ANXA1;GADD45B;FLNA;SESN1;SYK;ATM;NCF1;KLRK1;LYN;FYN;AKNA;RPS19;PTPRC;IER5;KLF4	ETS1;SYK;IFI205;FCGR3;PTPN22;S100A8;RASGRP1;SAMHD1;AKNA;SESN1;AOAH;KLRK1;FLNA;KLF4;FYN;PTPRC;S100A9;GBP5;TYROBP;BCL2;ATM;CD44;FGL2	S100A9;SYK;AOAH;FGL2;KLF4;KLRK1;HCK;ALOX5AP;FGR;GADD45B;PTPN22;ATM;TNFAIP3;RASGRP1;TYROBP;TLR2;PTPRC;S100A8;AKNA		NCOA7;MEF2C;TGFBR3;ACKR3;CD34;PDGFB;IL33;MECOM;BMP4;KLF4;APP;CALCRL;TFPI;SEC14L1;YBX3;MMRN1;SELENON;CAV1;EDNRB;PTGIS;MAPK7;TLR4;TEK;FCGR3;DNASE1L3	CALCRL;PTGIS;DNASE1L3;C1QTNF1;MEF2C;MAPK7;PDGFB;HIC1;IL33;FLT4;SEC14L1;SELENON;TGFBR3;SERPINE1;NOS3;MID1;TLR4;NCOA7;CDH5;FCGR3;TFPI;KLF4
GOBP_POSITIVE_REGULATION_OF_INTRACELLULAR_SIGNAL_TRANSDUCTION							2.6	3.236	4.964	3.416	4.272	4.953	1.813	1.357	3.139							14	20	22	18	18	18	12	19	24							FGD2;PRKCB;HMOX1;LAPTM5;TLR2;GNAI2;GLIPR2;GADD45B;HCLS1;THBS1;AXL;NCKAP1L;FKBP1A;LIMS1	SECTM1A;FCGR3;CSF1R;PYCARD;SPI1;CD44;LAPTM5;ARRB2;LRRK2;AXL;NCKAP1L;FGD2;GLIPR2;GNAI2;S100A9;S100A8;LIMS1;SYK;CD86;PRKCB	S100A9;AXL;ARRB2;NCKAP1L;GNAI2;FCGR3;PYCARD;LRRK2;SYK;GADD45B;S100A8;PRKCB;TLR2;HCLS1;SLC15A3;REL;FGD2;MARCO;FGR;CSF1R;LAPTM5;SPI1	PTPN22;CD44;CSF1R;TLR2;PTPRC;SYK;LAPTM5;ATM;HCLS1;NCF1;FGR;LYN;ADGRG1;GADD45B;PRKCB;FLNA;FYN;SEMA4D	CSF1R;KIT;RASGRP1;ADGRG1;PRKCB;FLNA;SYK;LCK;FCGR3;SEMA4D;FYN;PTPN22;S100A8;PTPRC;ATM;LAPTM5;S100A9;CD44	FGR;PTPN22;ATM;GADD45B;S100A9;SYK;RASGRP1;KIT;CSF1R;TLR2;LAPTM5;PTPRC;LCK;S100A8;PRKCB;HCLS1;ADGRG1;SEMA4D	HIC1;BMP4;ADGRG1;SLC20A1;GJA1;VWF;ICAM1;COL3A1;AVPI1;FKBP1A;APP;PDGFB	ACKR3;PDGFB;AKAP12;BMP4;RELN;COL3A1;CAV2;KDR;SLC20A1;APP;CDH13;SELP;NPR1;ADGRG1;CAV1;TLR4;TEK;FCGR3;VWF	VWF;SLC20A1;ECM1;ADGRG1;RELN;C1QTNF1;PDGFB;CDH13;AVPI1;SELP;HIC1;FLT4;TCIM;ENG;CAV2;FLT1;ICAM1;MID1;KDR;AKAP12;GNAI2;TLR4;FCGR3;COL3A1
GOBP_LEUKOCYTE_CHEMOTAXIS							2.397	7.362	7.095	7.413	5.415	7.903										6	14	13	13	10	12										MPP1;THBS1;ANXA1;NCKAP1L;CXCR4;PREX1	ANXA1;FOLR2;NCKAP1L;LGMN;CSF1R;SPI1;PREX1;S100A9;AIF1;FCER1G;SYK;ITGB2;MPP1;S100A8	S100A8;AIF1;S100A9;LGMN;CSF1R;FCER1G;NCKAP1L;FOLR2;SYK;PREX1;IL6RA;ITGB2;SPI1	RPS19;CSF1R;FCER1G;CORO1A;RAC2;SYK;ITGB2;KLRK1;LYN;ANXA1;CXCR4;CCR5;AIF1	CSF1R;KIT;CORO1A;FCER1G;SYK;S100A8;CCR5;AIF1;S100A9;KLRK1	AIF1;RAC2;S100A9;SYK;KIT;CORO1A;CSF1R;ITGB2;S100A8;KLRK1;CCR5;FCER1G
GOBP_REGULATION_OF_PROTEIN_PHOSPHORYLATION								1.46	2.959	3.704	2.112	3.37			2.849								16	19	20	14	16			25								NCKAP1L;FGD2;RAP2B;DUSP6;DAB2;CCDC88A;CSF1R;ARRB2;PYCARD;SYK;AIF1;CD44;LRRK2;ITGB2;SLC11A1;CD86	CCDC88A;ARRB2;DAB2;NCKAP1L;AIF1;PYCARD;LRRK2;SYK;GADD45B;SLC11A1;RAP2B;HCLS1;PILRB1;IL6RA;ITGB2;FGD2;MARCO;FGR;CSF1R	FGR;PTPN22;AIF1;BCL2;CD44;CSF1R;TNFAIP3;GADD45B;CCND2;SYK;CCDC88A;ATM;HCLS1;NCF1;LYN;FYN;SEMA4D;PTPRC;SLC11A1;ITGB2	CSF1R;KIT;CCDC88A;RASGRP1;SYK;CCND2;SEMA4D;FYN;PTPN22;PTPRC;ATM;AIF1;CD44;BCL2	AIF1;FGR;SLC11A1;CCDC88A;ATM;TNFAIP3;GADD45B;PTPN22;SYK;RASGRP1;KIT;CSF1R;ITGB2;PTPRC;HCLS1;SEMA4D			EHD4;RASIP1;HEG1;IGFBP3;SMAD6;ACVRL1;RELN;PDGFB;WWTR1;FLT4;ITGA5;TCIM;ENG;FLT1;KDR;DAB2;TAL1;SH2D3C;PECAM1;TLR4;PTPRB;CDH5;LIMCH1;NEDD9;CNKSR3
GOBP_GRANZYME_MEDIATED_PROGRAMMED_CELL_DEATH_SIGNALING_PATHWAY											2.497															2															SRGN;GZMB
GOBP_VENTRICULAR_SEPTUM_DEVELOPMENT														1.976	1.529														5	4														BMP4;TGFBR3;GJA5;LUZP1;SMAD6	SMAD6;NOS3;TGFBR3;HEG1
GOBP_NEGATIVE_REGULATION_OF_CELL_KILLING								2.415	2.594		1.726												3	3		2												ARRB2;FCGR3;NCKAP1L	ARRB2;NCKAP1L;FCGR3		PTPRC;FCGR3
GOBP_HYDROGEN_PEROXIDE_CATABOLIC_PROCESS	1.432															2															HP;CAT
GOBP_REGULATION_OF_CALCIUM_ION_TRANSPORT_INTO_CYTOSOL										1.844	1.386														4	3														BCL2;CORO1A;LYN;FYN	CORO1A;BCL2;FYN
GOBP_CONNECTIVE_TISSUE_DEVELOPMENT				1.355	1.609	1.459		1.316					2.466	3.083	2.411				4	5	4		6					7	12	10				COL3A1;COL1A1;COL5A1;ACTA2	COL1A1;COL5A1;ACTA2;COL3A1;MGP	COL1A1;COL5A1;MGP;PTH1R		MAF;SPI1;NAMPT;CD44;TGFBI;TRPS1					SERPINH1;NAMPT;BMP4;ACVRL1;COL3A1;CD34;PDGFB	ACVRL1;BMP4;MEF2C;SERPINH1;CHSY1;NAMPT;MGP;KLF7;PDGFB;COL3A1;CD34;MAF	MAF;NAMPT;MEF2C;PDGFB;KLF7;ECM1;CHSY1;MGP;ACVRL1;COL3A1
GOBP_OVULATION_FROM_OVARIAN_FOLLICLE				2.33											1.625				2											2				ADAMTS1;MMP2											NOS3;ADAMTS1
GOBP_SOMATIC_DIVERSIFICATION_OF_IMMUNE_RECEPTORS										1.447	2.373	1.774													3	4	3													ATM;TCF7;PTPRC	TCF7;SAMHD1;PTPRC;ATM	TCF7;PTPRC;ATM
GOBP_RUFFLE_ORGANIZATION								1.505		2.56	2.787	2.089											3		4	4	3											CSF1R;AIF1;PLEK		PLEK;AIF1;CSF1R;EVL	EVL;PLEK;CSF1R;AIF1	AIF1;EVL;CSF1R
GOBP_CAVEOLA_ASSEMBLY														1.984															2															CAV2;CAV1
GOBP_REGULATION_OF_B_CELL_PROLIFERATION								2.074	1.521	4.237	5.766	2.833			1.621								4	3	6	7	4			4								FCGR3;TYROBP;NCKAP1L;IFI205	FCGR3;NCKAP1L;TYROBP	PTPRC;TYROBP;SASH3;ATM;LYN;BCL2	IFI205;FCGR3;PTPRC;ATM;BCL2;SASH3;TYROBP	TYROBP;SASH3;PTPRC;ATM			MEF2C;CD320;TLR4;FCGR3
GOBP_METANEPHRIC_GLOMERULUS_VASCULATURE_DEVELOPMENT													2.249	1.691														2	2														CD34;PDGFB	PDGFB;CD34
GOBP_REGULATION_OF_INSULIN_RECEPTOR_SIGNALING_PATHWAY											1.753	1.918														3	3														PRKCQ;PRKCB;PIP4K2A	PRKCB;PIP4K2A;PRKCQ
GOBP_TRANSMEMBRANE_RECEPTOR_PROTEIN_SERINE_THREONINE_KINASE_SIGNALING_PATHWAY				3.133	3.189	1.584							2.326	2.917	3.31				8	9	5							8	14	14				FBN1;COL1A2;LTBP4;THBS1;FSTL1;ITGA8;VIM;COL3A1	FSTL1;VIM;SFRP1;FOS;LTBP4;COL1A2;ITGA8;FBN1;COL3A1	COL1A2;FBN1;ENG;ITGA8;VIM							SPRY1;BMP4;VIM;ACVRL1;LTBP4;SMAD6;COL3A1;FKBP1A	ACVRL1;BMP4;CLDN5;SKI;TGFBR3;DAB2;CAV2;ZEB2;VIM;KDR;LTBP4;COL3A1;CAV1;SMAD6	WWTR1;DAB2;COL3A1;ENG;ZEB2;TGFBR3;VIM;CAV2;CDH5;CLDN5;SMAD6;PXN;ACVRL1;KDR
GOBP_VACUOLAR_ACIDIFICATION								1.355	1.478														2	2														SLC11A1;PPT1	SLC11A1;PPT1
GOBP_RESPONSE_TO_INTERLEUKIN_4										1.334	1.442	1.555													2	2	2													TCF7;CORO1A	TCF7;CORO1A	TCF7;CORO1A
GOBP_BONE_TRABECULA_FORMATION				2.33	3.539														2	3														COL1A1;MMP2	MMP2;COL1A1;SFRP1
GOBP_POSITIVE_REGULATION_OF_INTEGRIN_MEDIATED_SIGNALING_PATHWAY				2.598	2.412														2	2														CD63;FLNA	CD63;FLNA
GOBP_PEPTIDE_CROSS_LINKING				1.648			1.52						1.454						2			2						2						THBS1;COL3A1			ANXA1;THBS1						COL3A1;ANXA1
GOBP_CAMERA_TYPE_EYE_DEVELOPMENT				1.56	1.735	1.685							6.018	2.751					5	6	5							13	13					FBN1;KLF4;THY1;VIM;COL4A1	VIM;KLF4;TBX2;THY1;CRYAB;FBN1	FBN1;THY1;TBX2;VIM;KLF4							NES;SPRY1;COL4A1;BMP4;GPM6A;VIM;RHOJ;GJA1;KLF4;DLL1;LAMB2;ACVRL1;COL8A1	ACVRL1;BMP4;MAF;SKI;LAMB2;COL8A1;KLF4;PTPRM;NES;VIM;KDR;GPM6A;DLL1
GOBP_REGULATION_OF_NUCLEOTIDE_BINDING_OLIGOMERIZATION_DOMAIN_CONTAINING_2_SIGNALING_PATHWAY										2.376		2.672													2		2													PTPN22;TNFAIP3		TNFAIP3;PTPN22
GOBP_NEGATIVE_REGULATION_OF_MITOTIC_CELL_CYCLE										1.427															5															BTG2;BTG1;ATM;KLF4;BCL2
GOBP_ALDITOL_METABOLIC_PROCESS			1.517															2															PCK1;ANGPTL3
GOBP_UNSATURATED_FATTY_ACID_METABOLIC_PROCESS			1.814				1.416											4				3											CYP2D10;CYP4A32;EPHX1;SCP2				CYP2A4;ANXA1;TBXAS1
GOBP_ENDOCRINE_PROCESS															1.359															4															DAB2;NOS3;C1QTNF1;RPS6KA2
GOBP_CELLULAR_COMPONENT_ASSEMBLY_INVOLVED_IN_MORPHOGENESIS					1.389	1.612														3	3														MYL9;TPM1;MYH11	MYH11;TPM1;CSRP1
GOBP_NEGATIVE_REGULATION_OF_MUSCLE_CELL_DIFFERENTIATION
GOBP_PHAGOCYTOSIS	1.609						6.304	9.977	14.253	13.153	7.56	13.373				6						12	18	21	20	13	18				CAMK1D;ABCA1;C4BP;APOA2;CRP;SOD1						CD93;TYROBP;NCF2;ANXA1;TLR2;CYBA;THBS1;AXL;RAB31;NCKAP1L;IRF8;PLD4	ANXA1;NCKAP1L;FCGR3;RAB31;CYBA;PLD4;PYCARD;ITGB2;FCER1G;TYROBP;AIF1;HCK;NCF2;SYK;MERTK;IRF8;AXL;SLC11A1	AXL;NCKAP1L;MSR1;HCK;FCGR3;AIF1;PYCARD;SYK;CYBA;RAB31;SLC11A1;TLR2;FCER1G;IRF8;ITGB2;NCF2;MARCO;FGR;PLD4;TYROBP;MERTK	ARHGAP25;ITGAL;TLR2;IL2RB;CDC42SE2;FGR;AIF1;TYROBP;RAC2;ANXA1;CORO1A;SYK;LYN;FYN;NCF2;FCER1G;PTPRC;SLC11A1;ITGB2;RAB31	CORO1A;SYK;FCER1G;RAB31;ARHGAP25;FCGR3;IL2RB;FYN;CDC42SE2;PTPRC;NCF2;AIF1;TYROBP	AIF1;ARHGAP25;HCK;SLC11A1;RAC2;ITGAL;FGR;BIN2;SYK;ITGB2;CORO1A;IL2RB;TYROBP;TLR2;PTPRC;NCF2;RAB31;FCER1G
GOBP_CELLULAR_RESPONSE_TO_EXTERNAL_STIMULUS								1.489	1.753	1.45													7	7	6													FOLR2;UCP2;CYBA;LRRK2;AIF1;VCAM1;AXL	VCAM1;AIF1;AXL;UCP2;LRRK2;CYBA;FOLR2	PTPRC;NFKB1;SESN1;LYN;AIF1;BCL2
GOBP_CELLULAR_RESPONSE_TO_IRON_ION							2.262															2															SLC40A1;HMOX1
GOBP_REGULATION_OF_T_HELPER_2_CELL_DIFFERENTIATION								1.872															2															ANXA1;CD86
GOBP_NEGATIVE_REGULATION_OF_INNATE_IMMUNE_RESPONSE								1.337															3															SAMHD1;ARRB2;VSIG4
GOBP_POSITIVE_REGULATION_OF_CELL_DIFFERENTIATION							2.159	2.171	1.66	3.436	2.823	2.399	1.441		2.607							12	16	13	17	14	12	10		21							CD83;ANXA1;TLR2;GLIPR2;HCLS1;NCKAP1L;AXL;TYROBP;CXCR4;PREX1;LIMS1;VSIR	ANXA1;VSIR;NCKAP1L;DAB2;CD83;GLIPR2;ARRB2;LIMS1;TENT5A;PREX1;SYK;TYROBP;METRNL;ZEB2;AXL;CD86	TLR2;TYROBP;HCLS1;AXL;ARRB2;DAB2;MSR1;NCKAP1L;SYK;PREX1;IL6RA;ZEB2;VSIR	TLR2;ETS1;PTPRC;NFKB1;TYROBP;PRKCH;SASH3;BTG1;SYK;HCLS1;LYN;ANXA1;CXCR4;CD83;FLNA;SEMA4D;BCL2	ETS1;KIT;CD83;RASGRP1;FLNA;SYK;TYROBP;SEMA4D;ZEB2;PTPRC;PRKCH;TOX;BCL2;SASH3	SYK;RASGRP1;KIT;PRKCH;SASH3;TYROBP;TLR2;PTPRC;HCLS1;ZEB2;TOX;SEMA4D	BMP4;CEBPD;GJA1;TIAM1;ADAMTS9;ACVRL1;ANXA1;NEDD9;CD34;SOX17		PLXND1;IGFBP3;CLDN5;ACVRL1;RELN;MEF2C;CSNK1E;WWTR1;RAMP2;ENG;TCF4;SERPINE1;KDR;DAB2;TAL1;SOX17;ZEB2;CEBPD;CDH5;SHANK3;NEDD9
GOBP_REGULATION_OF_ENDOTHELIAL_CELL_CHEMOTAXIS				1.884															2															THBS1;SEMA5A
GOBP_POSITIVE_REGULATION_OF_NATURAL_KILLER_CELL_DIFFERENTIATION											2.399	2.575														2	2														RASGRP1;TOX	RASGRP1;TOX
GOBP_INTERLEUKIN_17_PRODUCTION							1.391															2															NCKAP1L;VSIR
GOBP_PEPTIDE_BIOSYNTHETIC_PROCESS										3.313															14															RPS19;RPL13;RPL10A;BTG2;RPLP2;RPL27;RPS18;RPS14;RPL27A;RPS15A;VIM;RPL18;RPS12;PABPC4
GOBP_REGULATION_OF_GAMMA_DELTA_T_CELL_ACTIVATION								1.942	2.072	3.523	3.698	3.925											2	2	3	3	3											SYK;NCKAP1L	NCKAP1L;SYK	TCF7;SYK;PTPRC	SYK;TCF7;PTPRC	TCF7;SYK;PTPRC
GOBP_REGULATION_OF_TRANSPORT							2.871	3.164	4.553	2.158		1.927										21	29	30	22		17										SGK1;FKBP1A;CYBA;ANXA1;TLR2;CD84;HCLS1;SLC31A2;PRKCB;CYBB;PTAFR;GNAI2;THBS1;AXL;NCKAP1L;HMOX1;PPT1;SLC43A2;OAZ1;RAB31;CXCR4	PTAFR;FCGR3;UCP2;SLC31A2;PYCARD;SPI1;MERTK;FRMD4A;GZMB;ARRB2;FCER1G;LRRK2;AXL;PPT1;ANXA1;NCKAP1L;RAB31;GNAI2;CYBA;HCK;CD84;SLC11A1;S100A8;SLC43A2;DAB2;CYBB;SYK;ITGB2;PRKCB	AXL;ARRB2;FRMD4A;NCKAP1L;DAB2;HCK;GNAI2;FCGR3;PYCARD;LRRK2;SYK;CYBA;RAB31;SLC11A1;S100A8;SLC31A2;PRKCB;TLR2;PPT1;HCLS1;FCER1G;SGK1;ITGB2;CYBB;FGR;UCP2;MERTK;SLC43A2;CD84;SPI1	TLR2;IL2RB;NFKB1;CYBB;FGR;SGK1;CXCR4;BCL2;RAC2;ANXA1;FLNA;CORO1A;SYK;HCLS1;LYN;FYN;FCER1G;PTPRC;SLC11A1;ITGB2;RAB31;PRKCB		FGR;HCK;SLC11A1;RAC2;SYK;ITGB2;CORO1A;IL2RB;CYBB;SGK1;TLR2;FCER1G;PTPRC;S100A8;PRKCB;HCLS1;RAB31
GOBP_CELL_FATE_DETERMINATION					1.364	1.523							3.008	1.984	2.112					2	2							4	4	4					TBX2;KLF4	TBX2;KLF4							BMP4;KLF4;DLL1;SOX17	MEF2C;BMP4;DLL1;KLF4	MEF2C;SOX17;DLL1;KLF4
GOBP_CARDIAC_MUSCLE_CELL_DIFFERENTIATION														1.365															5															BMP4;KDM6B;MEF2C;EFNB2;DLL1
GOBP_POSITIVE_REGULATION_OF_SECRETION								1.89	2.759			1.443											8	9			5											PTAFR;DAB2;GNAI2;CYBA;SYK;ITGB2;S100A8;FRMD4A	S100A8;FGR;TLR2;FRMD4A;DAB2;SYK;CYBA;ITGB2;GNAI2			FGR;SYK;ITGB2;TLR2;S100A8
GOBP_THYMUS_DEVELOPMENT										1.923	2.104	1.371													3	3	2													ATM;BCL2;JARID2	BCL2;JARID2;ATM	JARID2;ATM
GOBP_NEGATIVE_REGULATION_OF_VASCULAR_ENDOTHELIAL_CELL_PROLIFERATION															1.572															2															MEF2C;FLT1
GOBP_NEGATIVE_REGULATION_OF_HUMORAL_IMMUNE_RESPONSE_MEDIATED_BY_CIRCULATING_IMMUNOGLOBULIN									2.144						1.684									2						2									FCGR3;CD55						CD55;FCGR3
GOBP_REGULATION_OF_MUSCLE_ORGAN_DEVELOPMENT													2.009	1.9														3	4														BMP4;GJA1;DLL1	MEF2C;BMP4;DLL1;YBX3
GOBP_RESPONSE_TO_GAMMA_RADIATION										1.764	1.93														3	3														ATM;BCL2;PTPRC	BCL2;PTPRC;ATM
GOBP_ARTERY_MORPHOGENESIS	1.327				1.656	2.797							2.283	3.229	1.45	3				3	4							4	7	4	PROX1;ANGPTL3;APOB				TBX2;COL3A1;NOTCH3	TBX2;ADGRF5;NOTCH3;ENG							ADAMTS9;COL3A1;BMP4;ACVRL1	ACVRL1;BMP4;GJA5;EFNB2;COL3A1;ADAMTS9;ADGRF5	ACVRL1;ENG;COL3A1;ADGRF5
GOBP_RESPONSE_TO_OXYGEN_RADICAL					1.635															2															FBLN5;SOD3
GOBP_ACTIVATION_OF_CYSTEINE_TYPE_ENDOPEPTIDASE_ACTIVITY								1.547	1.671														2	2														PYCARD;LGMN	PYCARD;LGMN
GOBP_SUPRAMOLECULAR_FIBER_ORGANIZATION				7.68	12.445	5.28	2.105	2.639	2.375	3.049	2.803	3.26	2.845	2.069	2.466				18	25	14	11	16	14	15	13	13	13	19	19				COL14A1;COL1A1;MARCKS;PXDN;FLNA;LUM;AEBP1;COL1A2;SEMA5A;CDC42EP3;COL5A1;FBLN5;CSRP1;ENAH;TPM1;COL3A1;ADAMTS2;VIM	MFAP4;SFRP1;FBLN5;FLNA;MARCKS;CDC42EP3;PXDN;MYH11;MYL9;COL3A1;ACTN1;COL1A1;LUM;COL1A2;TPM2;TPM1;AEBP1;RGS4;COL5A1;COL14A1;VIM;SEMA5A;CRYAB;ENAH;ADAMTS2	COL1A2;RGS4;ACTN1;TPM2;PXDN;COL5A1;LUM;MYH11;VIM;ADAMTS2;CSRP1;COL1A1;MFAP4;TPM1	PLEK;ARPC1B;PREX1;COTL1;TMSB10;HCLS1;MARCKS;NCKAP1L;VIM;FKBP1A;CDC42EP3	NCKAP1L;VIM;MARCKS;ARPC1B;CCDC88A;MYH11;TMSB10;WAS;PYCARD;PREX1;HCK;AIF1;PLEK;COTL1;WASF2;CDC42EP3	WAS;VIM;AIF1;COTL1;CCDC88A;HCLS1;ARHGEF10L;PYCARD;NCKAP1L;TMSB10;PREX1;ARPC1B;HCK;MYH11	ARHGAP25;BCL2;CORO1A;RAC2;COTL1;CCDC88A;SH3KBP1;HCLS1;VIM;CYFIP2;PLEK;FLNA;WIPF1;AIF1;EVL	EVL;CCDC88A;CYFIP2;CORO1A;COTL1;FLNA;SH3KBP1;PLEK;ARHGAP25;VIM;AIF1;WIPF1;BCL2	AIF1;ARHGAP25;HCK;RAC2;CCDC88A;WIPF1;CYFIP2;VIM;COTL1;CORO1A;SH3KBP1;EVL;HCLS1	CRTAP;SERPINH1;PXDN;VIM;TMSB10;CSRP1;CDC42EP3;DPYSL3;LIMCH1;COL3A1;NEDD9;FKBP1A;APP	CDC42EP3;TMOD3;DLC1;PGM5;DSTN;MARCKSL1;DPYSL3;CRTAP;ESAM;ACTN1;APP;ADD3;FSCN1;TMSB10;PXDN;VIM;MARCKS;SERPINH1;COL3A1	TMSB10;PXN;MYO1C;CSRP1;ADD3;ESAM;DPYSL3;SHROOM4;MARCKSL1;LIMCH1;MID1;PXDN;FSCN1;ACTN1;VIM;CDH5;SHANK3;NEDD9;COL3A1
GOBP_REGULATION_OF_DNA_DAMAGE_RESPONSE_SIGNAL_TRANSDUCTION_BY_P53_CLASS_MEDIATOR										1.334	1.442														2	2														ATM;CD44	CD44;ATM
GOBP_POSITIVE_REGULATION_OF_IMMUNE_EFFECTOR_PROCESS							2.19	3.759	2.862	6.865	4.153	7.345										6	10	8	13	9	12										LAPTM5;PTAFR;ANXA1;CD84;HMOX1;TYROBP	ANXA1;PTAFR;LAPTM5;STX7;SPI1;SYK;TYROBP;CD84;ITGB2;CD86	CD55;FGR;TYROBP;SYK;LAPTM5;ITGB2;CD84;SPI1	RPS19;PTPRC;TYROBP;RAC2;SASH3;SYK;LAPTM5;ITGB2;KLRK1;FGR;ANXA1;LYN;PTPN22	KIT;RASGRP1;SYK;PTPRC;PTPN22;LAPTM5;KLRK1;TYROBP;SASH3	FGR;PTPN22;RAC2;SYK;RASGRP1;KIT;ITGB2;SASH3;TYROBP;LAPTM5;PTPRC;KLRK1
GOBP_NEUROINFLAMMATORY_RESPONSE											1.357	1.47														2	2														PTPRC;ATM	PTPRC;ATM
GOBP_HEMATOPOIETIC_STEM_CELL_HOMEOSTASIS														2.021															3															MYCT1;ADGRG1;EMCN
GOBP_FATTY_ACID_TRANSPORT	1.671		1.814													4		4													SLC27A2;ACSL1;PLIN2;FABP1		CYP4A32;PLIN2;ACSL1;FABP1
GOBP_REGULATION_OF_ALCOHOL_BIOSYNTHETIC_PROCESS	1.651							1.585								3							3								APOB;SOD1;H6PD							PTAFR;DAB2;PLEK
GOBP_BLOOD_VESSEL_ENDOTHELIAL_CELL_PROLIFERATION_INVOLVED_IN_SPROUTING_ANGIOGENESIS				1.549			1.405						1.362	1.451					2			2						2	3					THBS1;SEMA5A			HMOX1;THBS1						BMP4;ACVRL1	ACVRL1;BMP4;MMRN2
GOBP_REGULATION_OF_DEVELOPMENTAL_GROWTH	1.571															7															GHR;AR;HAMP;ACACB;STAT3;PROX1;SOD1
GOBP_NEGATIVE_REGULATION_OF_INTERLEUKIN_17_PRODUCTION							1.952	1.661	1.791													2	2	2													NCKAP1L;VSIR	NCKAP1L;VSIR	NCKAP1L;VSIR
GOBP_REGULATION_OF_DEFENSE_RESPONSE								4.816	4.4	7.882	7.858	7.785											18	16	21	19	18											ANXA1;KLF4;FCGR3;FGL2;CYBA;ARRB2;IFI205;PYCARD;SPI1;HCK;S100A9;TYROBP;SAMHD1;METRNL;VSIG4;LRRK2;SYK;S100A8	FCGR3;S100A8;S100A9;FGR;TLR2;TYROBP;PYCARD;ARRB2;LRRK2;SYK;FGL2;VSIG4;HCK;CYBA;KLF4;SPI1	ETS1;TLR2;AOAH;NFKB1;ALOX5AP;FGR;PTPN22;TYROBP;TNFAIP3;FGL2;ANXA1;SYK;ATM;NCF1;KLRK1;LYN;FYN;AKNA;RPS19;PTPRC;KLF4	ETS1;SYK;IFI205;FCGR3;PTPN22;S100A8;RASGRP1;SAMHD1;AKNA;AOAH;KLRK1;KLF4;FYN;PTPRC;S100A9;GBP5;TYROBP;ATM;FGL2	HCK;ALOX5AP;ATM;FGR;TNFAIP3;S100A9;PTPN22;SYK;RASGRP1;FGL2;KLF4;TYROBP;TLR2;PTPRC;S100A8;AKNA;KLRK1;AOAH
GOBP_RESPONSE_TO_BMP														1.318	1.458														6	6														ACVRL1;BMP4;SKI;TGFBR3;KDR;SMAD6	ENG;TGFBR3;CDH5;SMAD6;ACVRL1;KDR
GOBP_CELLULAR_RESPONSE_TO_MOLECULE_OF_BACTERIAL_ORIGIN							1.872	5.03	5.523	3.391	1.836	3.414		1.867	2.587							5	11	11	8	5	7		8	9							PTAFR;TLR2;AXL;VIM;IRF8	PTAFR;VIM;MRC1;FCGR3;PYCARD;SPI1;LY86;HCK;IRF8;AXL;CD86	FCGR3;LY86;CD55;VIM;MRC1;TLR2;AXL;PYCARD;IRF8;HCK;SPI1	TLR2;NFKB1;TNFAIP3;KLRK1;LYN;CCR5;PTPN22;VIM	VIM;FCGR3;PTPN22;CCR5;KLRK1	HCK;PTPN22;TNFAIP3;VIM;TLR2;KLRK1;CCR5		EDNRB;MRC1;MEF2C;EFNB2;TLR4;VIM;FCGR3;PLSCR4	CD55;MEF2C;PLSCR4;VIM;TLR4;SERPINE1;NOS3;FCGR3;MRC1
GOBP_RESPONSE_TO_CADMIUM_ION	1.671											1.333				3											2				SOD1;HAAO;CAT											CYBB;KIT
GOBP_T_CELL_ACTIVATION							3.964	9.586	8.228	9.479	12.034	11.014										12	23	20	21	22	20										ICOSL;CD83;FGL2;LAPTM5;ANXA1;VCAM1;CD84;WDFY4;NCKAP1L;FKBP1A;PREX1;VSIR	VSIR;FCGR3;FGL2;PYCARD;SPI1;CD44;VSIG4;MAP3K8;LAPTM5;FCER1G;AIF1;ANXA1;NCKAP1L;WDFY4;CD83;ICOSL;CD84;VCAM1;SLC11A1;WAS;PREX1;SYK;CD86	WAS;VCAM1;CD55;ICOSL;NCKAP1L;FCGR3;AIF1;PYCARD;SYK;SLC11A1;FCER1G;IL6RA;WDFY4;PREX1;FGL2;VSIG4;LAPTM5;VSIR;CD84;SPI1	ITGAL;LAPTM5;PTPN22;AIF1;BCL2;CD44;TCF7;RAC2;FGL2;ANXA1;CD83;CD48;CORO1A;SASH3;SYK;KLRK1;LYN;FYN;FCER1G;PTPRC;SLC11A1	KIT;CD83;SYK;FCER1G;LCK;FCGR3;PTPN22;AIF1;TOX;RASGRP1;CORO1A;PRKCQ;LAPTM5;KLRK1;SASH3;CD48;FYN;PTPRC;BCL2;TCF7;CD44;FGL2	SLC11A1;PRKCQ;SYK;LAPTM5;LCK;TCF7;AIF1;RAC2;FGL2;CORO1A;KLRK1;FCER1G;KIT;SASH3;TOX;PTPN22;ITGAL;RASGRP1;PTPRC;CD48
GOBP_REGULATION_OF_ANIMAL_ORGAN_FORMATION													1.473															2															SPRY1;BMP4
GOBP_VASCULAR_WOUND_HEALING						1.986				1.731					2.139						2				2					3						MCAM;SERPINE1				TNFAIP3;CXCR4					SERPINE1;MCAM;KDR
GOBP_CELLULAR_RESPONSE_TO_PROSTAGLANDIN_E_STIMULUS										1.856		2.124													2		2													PTGER2;GNG2		GNG2;PTGER2
GOBP_RESPONSE_TO_AMYLOID_BETA								1.54	1.698				1.855	1.706	2.563								3	3				3	4	5								VCAM1;FCGR3;LGMN	VCAM1;FCGR3;LGMN				GJA1;APP;ICAM1	VCAM1;FCGR3;TLR4;APP	LGMN;TLR4;FCGR3;ICAM1;VCAM1
GOBP_REGULATION_OF_EPITHELIAL_CELL_APOPTOTIC_PROCESS															2.457															6															MAPK7;RAMP2;SERPINE1;CDH5;ICAM1;KDR
GOBP_NEGATIVE_REGULATION_OF_INFLAMMATORY_RESPONSE								1.585	1.804	5.779	2.87	4.005		1.455	1.583								5	5	10	6	7		6	6								KLF4;FCGR3;HCK;SYK;METRNL	FCGR3;FGR;SYK;HCK;KLF4	RPS19;KLF4;AOAH;PTPRC;NFKB1;TNFAIP3;SYK;FGR;LYN;FYN	SYK;FCGR3;KLF4;FYN;PTPRC;AOAH	HCK;FGR;TNFAIP3;SYK;KLF4;PTPRC;AOAH		CALCRL;PTGIS;MAPK7;KLF4;TEK;FCGR3	MAPK7;CALCRL;PTGIS;CDH5;FCGR3;KLF4
GOBP_POSITIVE_REGULATION_OF_LEUKOCYTE_APOPTOTIC_PROCESS										1.599															2															LYN;ANXA1
GOBP_FOREBRAIN_REGIONALIZATION													1.597															2															ADGRG1;BMP4
GOBP_LYMPHOCYTE_HOMEOSTASIS										2.406															4															BCL2;CORO1A;TNFAIP3;LYN
GOBP_CELL_MORPHOGENESIS				3.021	2.695	2.351	2.049	4.593	2.786	3.504	2.25	3.101	1.966	3.182	3.093				13	14	11	13	24	18	19	14	15	13	27	25				FBLN1;LAMC1;FLNA;SPARC;NOTCH3;SEMA5A;THY1;CDC42EP3;TPM1;ENAH;ANTXR1;ITGA8;LAMB1	ANTXR1;LAMC1;LAMB1;FBLN1;SEMA5A;SPARC;FLNA;ITGA8;NOTCH3;THY1;ENAH;TPM1;CDC42EP3;ACTN1	LAMC1;SPARC;THY1;ACTN1;ITGA8;NOTCH3;LAMB1;ITGA1;ANTXR1;TPM1;FBLN1	LST1;SGK1;PLEKHO1;ANXA1;FBLIM1;FGD2;AXL;NCKAP1L;CXCR4;PREX1;CDC42EP3;LIMS1;S100A6	CSF1R;SPI1;CD44;MERTK;PLEKHO1;MEGF9;LIPA;LRRK2;AXL;SRGAP2;S100A6;ANXA1;NCKAP1L;FGD2;PARVG;HCK;EPB41L3;CDC42EP3;DAB2;LIMS1;PREX1;FBLIM1;ITGB2;WASF2	SRGAP2;FGR;EPB41L3;S100A6;CSF1R;AXL;DAB2;NCKAP1L;LRRK2;SGK1;MERTK;PREX1;HCK;ITGB2;LST1;PARVG;FGD2;SPI1	CDC42SE2;FGR;SGK1;CXCR4;BCL2;MBP;CD44;CSF1R;RAC2;KLF2;ANXA1;CYFIP2;FLNA;LST1;CORO1A;FYN;SEMA4D;SH3KBP1;ITGB2	CSF1R;KIT;CYFIP2;CORO1A;SH3KBP1;FLNA;KLF2;SEMA4D;FYN;CDC42SE2;PRKCQ;MBP;CD44;BCL2	HCK;RAC2;PRKCQ;FGR;CYFIP2;KIT;CSF1R;CORO1A;SH3KBP1;SGK1;ITGB2;MBP;LST1;KLF2;SEMA4D	PALM;SGK1;NES;GPM6A;RHOJ;TIAM1;CDC42EP3;SPARC;LAMB2;ANXA1;NEDD9;APP;SOX17	TAL1;MEF2C;CDC42EP3;PREX2;EFNB2;TIAM1;KLF7;DLC1;FGD5;GPM6A;RELN;KDR;EPHB4;APP;SPRY4;DAB2;PTPRM;SPARC;HECW2;SEMA6A;KLF2;LAMB2;NRN1;NES;TEK;ACTN1;PALM	KLF7;PXN;PLXND1;HEG1;RELN;MEF2C;SPARC;SEMA6A;ROBO4;PTPRM;SHROOM4;SGK1;KDR;DAB2;TAL1;EPHB4;SOX17;SEMA3F;ACTN1;KLF2;CDH5;SHANK3;NEDD9;PREX2;PEAK1
GOBP_REGULATION_OF_TISSUE_REMODELING										1.403		1.717													3		3													TNFAIP3;CSF1R;SYK		TNFAIP3;SYK;CSF1R
GOBP_REGULATION_OF_SIGNAL_TRANSDUCTION_BY_P53_CLASS_MEDIATOR										1.879	1.42														4	3														ATM;CD44;BCL2;SGK1	BCL2;CD44;ATM
GOBP_NEGATIVE_REGULATION_OF_NEURON_DEATH									1.386															5															LGMN;PPT1;AXL;ARRB2;LRRK2
GOBP_CD4_POSITIVE_ALPHA_BETA_T_CELL_ACTIVATION							2.118	2.268	1.792		2.119	1.566										4	5	4		4	3										NCKAP1L;CD83;ANXA1;VSIR	ANXA1;VSIR;NCKAP1L;CD83;CD86	IL6RA;VSIR;NCKAP1L;CD55		CD83;PRKCQ;TOX;SASH3	PRKCQ;SASH3;TOX
GOBP_REGULATION_OF_MICROGLIAL_CELL_ACTIVATION										1.731	1.856	1.993													2	2	2													ATM;PTPRC	PTPRC;ATM	PTPRC;ATM
GOBP_REGULATION_OF_T_CELL_DIFFERENTIATION_IN_THYMUS	1.38										1.639	1.77				2										2	2				SOD1;VNN1										RASGRP1;TOX	RASGRP1;TOX
GOBP_POSITIVE_REGULATION_OF_PHOSPHORUS_METABOLIC_PROCESS								2.487	3.507	3.389	2.782	2.368		1.867	4.072								17	18	17	14	12		20	25								PTAFR;NCKAP1L;FGD2;RAP2B;DAB2;CCDC88A;CSF1R;ARRB2;SYK;MERTK;AIF1;PLEK;CD44;LRRK2;AXL;SLC11A1;CD86	SLC11A1;MARCO;AIF1;RAP2B;FGR;CCDC88A;HCLS1;CSF1R;AXL;ARRB2;DAB2;NCKAP1L;LRRK2;SYK;MERTK;PILRB1;IL6RA;FGD2	CD44;SEMA4D;CSF1R;PTPRC;SLC11A1;SYK;CCDC88A;ATM;HCLS1;CCND2;NCF1;FGR;LYN;PLEK;FYN;AIF1;BCL2	CSF1R;KIT;CCDC88A;RASGRP1;SYK;PLEK;CCND2;SEMA4D;FYN;PTPRC;ATM;AIF1;CD44;BCL2	AIF1;FGR;SLC11A1;CCDC88A;ATM;SYK;RASGRP1;KIT;CSF1R;PTPRC;HCLS1;SEMA4D		TAL1;ACVRL1;ITGA6;MEF2C;DLC1;PDGFB;ADGRF5;BMP4;RELN;KDR;EPHB4;APP;PECAM1;TIE1;DAB2;CAV1;EDNRB;TLR4;KCTD20;TEK	EHD4;ACVRL1;ITGA6;RELN;MEF2C;PDGFB;FLT4;ITGA5;TCIM;ENG;NOS3;FLT1;ADGRF5;KCTD20;KDR;DAB2;TAL1;SH2D3C;EPHB4;PECAM1;TIE1;TLR4;CDH5;LIMCH1;NEDD9
GOBP_MONONUCLEAR_CELL_MIGRATION								2.554	2.873	5.382	2.023	2.956	1.438		2.362								7	7	10	5	6	4		8								ANXA1;FOLR2;LGMN;CSF1R;PYCARD;SPI1;AIF1	AIF1;LGMN;CSF1R;PYCARD;FOLR2;IL6RA;SPI1	ITGAL;RPS19;CSF1R;STK10;KLRK1;LYN;ANXA1;CXCR4;CCR5;AIF1	CSF1R;STK10;CCR5;AIF1;KLRK1	AIF1;ITGAL;CSF1R;KLRK1;CCR5;STK10	ANXA1;ICAM1;APP;PDGFB		PDGFB;ECM1;LGMN;PECAM1;SERPINE1;FLT1;ICAM1;JAM2
GOBP_REGULATION_OF_CHOLESTEROL_BIOSYNTHETIC_PROCESS	1.489															2															SOD1;APOB
GOBP_POSITIVE_REGULATION_OF_ENDOTHELIAL_CELL_MIGRATION				2.214	1.367		1.307						3.307	1.863	2.023				4	3		3						6	6	6				CCBE1;SPARC;THBS1;SEMA5A	SEMA5A;SPARC;CCBE1		HMOX1;ANXA1;THBS1						BMP4;RHOJ;SPARC;HDAC7;ANXA1;PDGFB	KDR;BMP4;TEK;SPARC;PDGFB;HDAC7	FLT4;SPARC;PDGFB;LGMN;NOS3;KDR
GOBP_REGULATION_OF_PEPTIDYL_TYROSINE_PHOSPHORYLATION								1.332	2.053	4.04	2.54	2.857											6	7	10	7	7											RAP2B;CSF1R;ARRB2;SYK;CD44;ITGB2	RAP2B;CSF1R;HCLS1;ARRB2;SYK;IL6RA;ITGB2	CD44;CSF1R;PTPRC;SYK;HCLS1;ITGB2;NCF1;LYN;FYN;SEMA4D	CSF1R;KIT;SYK;SEMA4D;FYN;PTPRC;CD44	SYK;ITGB2;KIT;CSF1R;PTPRC;HCLS1;SEMA4D
GOBP_ARTERY_DEVELOPMENT					1.44	2.351							2.649	4.024	2.16					3	4							5	9	6					TBX2;COL3A1;NOTCH3	TBX2;ADGRF5;NOTCH3;ENG							BMP4;ACVRL1;ADAMTS9;SMAD6;COL3A1	ACVRL1;BMP4;GJA5;ADGRF5;EFNB2;LUZP1;COL3A1;ADAMTS9;SMAD6	COL3A1;ENG;PLXND1;SMAD6;ACVRL1;ADGRF5
GOBP_NEGATIVE_REGULATION_OF_PEPTIDYL_TYROSINE_PHOSPHORYLATION
GOBP_LEUKOCYTE_CELL_CELL_ADHESION							4.27	10.082	7.64	11.527	14.167	12.977			1.684							11	21	17	21	22	20			10							ICOSL;CD83;FGL2;LAPTM5;PTAFR;ANXA1;VCAM1;NCKAP1L;KLF4;SELL;VSIR	PTAFR;VSIR;KLF4;FCGR3;FGL2;PYCARD;CD44;VSIG4;MAP3K8;LAPTM5;AIF1;ANXA1;NCKAP1L;CD83;S100A9;ICOSL;VCAM1;S100A8;SYK;ITGB2;CD86	FCGR3;VCAM1;S100A8;CD55;AIF1;S100A9;SELL;ICOSL;PYCARD;NCKAP1L;SYK;FGL2;VSIG4;LAPTM5;ITGB2;VSIR;KLF4	ITGAL;ETS1;LAPTM5;PTPN22;AIF1;CD44;RAC2;STK10;FGL2;ANXA1;CD83;CORO1A;SASH3;SYK;KLRK1;LYN;FYN;SEMA4D;PTPRC;ITGB2;KLF4	ETS1;CD83;SYK;LCK;FCGR3;PTPN22;S100A8;AIF1;RASGRP1;CORO1A;PRKCQ;LAPTM5;KLRK1;SASH3;KLF4;SEMA4D;FYN;PTPRC;S100A9;STK10;CD44;FGL2	PRKCQ;S100A9;SYK;LAPTM5;LCK;STK10;AIF1;RAC2;FGL2;CORO1A;ITGB2;KLF4;KLRK1;SASH3;SEMA4D;PTPN22;ITGAL;RASGRP1;PTPRC;S100A8			CD55;ITGA5;SELP;PECAM1;KLF4;FCGR3;CLEC4G;ICAM1;JAM2;VCAM1
GOBP_CD4_POSITIVE_ALPHA_BETA_T_CELL_DIFFERENTIATION							1.624	1.837		1.444	1.606											3	4		3	3											CD83;ANXA1;NCKAP1L	ANXA1;CD83;NCKAP1L;CD86		ANXA1;SASH3;CD83	CD83;TOX;SASH3
GOBP_EPITHELIUM_DEVELOPMENT				1.884	2.057	1.463							4.657	5.189	5.645				11	13	9							20	34	33				MMP2;FLNA;ACTA2;GPC6;KLF4;IGFBP5;FSTL1;COL5A1;VIM;COL4A1;EDNRB	KAZN;EDNRB;FSTL1;SFRP1;VIM;KLF4;TBX2;FLNA;MMP2;ACTA2;GPC6;IGFBP5;COL5A1	IGFBP5;ENG;SERPINE1;COL5A1;TBX2;GPC6;VIM;KLF4;GJA4							GJA1;KLF4;TIAM1;TAGLN2;PRICKLE2;ICAM1;ACVRL1;CD34;APOLD1;TIE1;SOX17;SPRY1;COL4A1;BMP4;VIM;DLL1;LAMB2;SMAD6;ANXA1;PDGFB	UGCG;ACVRL1;MMRN2;MEF2C;EFNB2;TIAM1;KLF7;DLC1;TAGLN2;PDGFB;RASIP1;DLL1;MAF;BMP4;KLF4;GJA5;LUZP1;KDR;LDB2;SMAD6;SKI;PECAM1;TIE1;DAB2;VIM;CAV1;APOLD1;EDNRB;KLF2;KDM6B;CLDN5;LAMB2;CD34;CNN3	KLF7;PLXND1;APOLD1;RASIP1;HEG1;CLDN5;SMAD6;ACVRL1;MEF2C;PDGFB;ROBO4;TAGLN2;DLL1;GJA4;PRICKLE2;WWTR1;MAF;ITGA5;ENG;SERPINE1;ICAM1;CNN3;KDR;DAB2;SOX17;PECAM1;KDM6B;KLF2;VIM;TIE1;CDH5;MMRN2;KLF4
GOBP_NEGATIVE_REGULATION_OF_CELL_PROJECTION_ORGANIZATION				2.33	2.035					2.237	2.534	1.536							5	5					6	6	4							FLNA;ITM2C;SEMA5A;THY1;VIM	VIM;SEMA5A;FLNA;THY1;ITM2C					SEMA4D;FLNA;FYN;VIM;EVL;MBP	EVL;FLNA;VIM;SEMA4D;FYN;MBP	MBP;VIM;EVL;SEMA4D
GOBP_LEUKOCYTE_ADHESION_TO_VASCULAR_ENDOTHELIAL_CELL							2.871	2.43	2.645	1.856		1.321			1.915							4	4	4	3		2			4							VCAM1;KLF4;PTAFR;SELL	PTAFR;KLF4;ITGB2;VCAM1	SELL;VCAM1;ITGB2;KLF4	KLF4;ITGB2;ETS1		KLF4;ITGB2			VCAM1;SELP;JAM2;KLF4
GOBP_MYELOID_LEUKOCYTE_ACTIVATION							5.748	9.532	10.431	6.954	4.224	8.423										11	17	17	13	9	13										CD93;C1QA;PTAFR;ANXA1;TLR2;IFNGR1;CD84;THBS1;TYROBP;PREX1;HMOX1	ANXA1;IFNGR1;PTAFR;FCGR3;LRRK2;PYCARD;SPI1;PREX1;FCER1G;AIF1;TYROBP;C1QA;VSIG4;CD84;ITGB2;SYK;SLC11A1	FCGR3;SLC11A1;AIF1;FGR;TLR2;TYROBP;FCER1G;PYCARD;IFNGR1;LRRK2;SYK;VSIG4;C1QA;PREX1;ITGB2;CD84;SPI1	TLR2;FCER1G;PTPRC;SLC11A1;TYROBP;RAC2;SYK;ATM;ITGB2;FGR;LYN;ANXA1;AIF1	KIT;RASGRP1;SYK;FCER1G;FCGR3;PTPRC;ATM;AIF1;TYROBP	AIF1;FGR;SLC11A1;ATM;RAC2;SYK;RASGRP1;KIT;ITGB2;TYROBP;TLR2;PTPRC;FCER1G
GOBP_TISSUE_MIGRATION				2.668	1.744		2.115	1.331					4.507	5.561	6.925				7	6		7	7					11	18	19				CCBE1;SPARC;ACTA2;KLF4;THBS1;SEMA5A;FSTL1	FSTL1;KLF4;SEMA5A;SPARC;CCBE1;ACTA2		THBS1;CTSH;ANXA1;GLIPR2;HMOX1;KLF4;VSTM4	ANXA1;LGMN;VSTM4;KLF4;GLIPR2;ZEB2;CTSH					ANGPT2;VASH1;BMP4;RHOJ;KLF4;ADAMTS9;SPARC;HDAC7;ACVRL1;ANXA1;PDGFB	CDH13;ACVRL1;BMP4;KDR;EPHB4;MMRN2;MEF2C;PRCP;KLF4;EFNB2;PTPRM;ZEB2;TEK;CLEC14A;SPARC;PDGFB;ADAMTS9;HDAC7	PLXND1;ACVRL1;CLEC14A;MEF2C;SPARC;CDH13;PDGFB;PTPRM;PRCP;FLT4;LGMN;NOS3;KDR;EPHB4;ZEB2;CDH5;PXN;MMRN2;KLF4
GOBP_POSITIVE_REGULATION_OF_CELL_MIGRATION_BY_VASCULAR_ENDOTHELIAL_GROWTH_FACTOR_SIGNALING_PATHWAY															1.761															2															MYO1C;KDR
GOBP_DEFENSE_RESPONSE_TO_GRAM_NEGATIVE_BACTERIUM								1.413	1.567						1.66								3	3						4								PYCARD;SLC11A1;RNASE6	PYCARD;SLC11A1;IL6RA						SELP;SERPINE1;TLR4;AQP1
GOBP_SUBSTRATE_ADHESION_DEPENDENT_CELL_SPREADING				4.165	3.582	3.254	1.351	4.461	3.071										6	6	5	3	8	6										FBLN1;LAMC1;FLNA;ANTXR1;ITGA8;LAMB1	ANTXR1;LAMC1;LAMB1;FBLN1;FLNA;ITGA8	LAMC1;ITGA8;LAMB1;ANTXR1;FBLN1	AXL;PREX1;LIMS1	DAB2;PARVG;LIMS1;PREX1;MEGF9;MERTK;AXL;SRGAP2	SRGAP2;AXL;DAB2;PREX1;MERTK;PARVG
GOBP_INTERFERON_GAMMA_PRODUCTION							2.016	2.852	3.102	2.459	2.732	3.904										4	6	6	5	5	6										AXL;IRF8;LAPTM5;VSIR	VSIR;LAPTM5;PYCARD;IRF8;AXL;SLC11A1	SLC11A1;AXL;PYCARD;IRF8;LAPTM5;VSIR	SLC11A1;SASH3;LAPTM5;KLRK1;PTPN22	RASGRP1;PTPN22;LAPTM5;KLRK1;SASH3	PTPN22;SLC11A1;RASGRP1;SASH3;LAPTM5;KLRK1
GOBP_INTERLEUKIN_10_PRODUCTION							2.723	4.18	4.488	3.518	3.789	3.029		1.671								4	6	6	5	5	4		4								TLR2;TYROBP;CD83;VSIR	VSIR;CD83;FCGR3;PYCARD;SYK;TYROBP	FCGR3;TLR2;TYROBP;PYCARD;SYK;VSIR	TLR2;TYROBP;SASH3;SYK;CD83	CD83;SYK;FCGR3;SASH3;TYROBP	TYROBP;TLR2;SYK;SASH3		TLR4;FCGR3;CD34;DLL1
GOBP_POSITIVE_REGULATION_OF_P38MAPK_CASCADE									1.328	1.408														2	2														GADD45B;SPI1	NCF1;GADD45B
GOBP_REGULATION_OF_PROTEIN_DEPHOSPHORYLATION							1.557															3															GNAI2;NCKAP1L;FKBP1A
GOBP_BODY_MORPHOGENESIS				1.405	1.31														2	2														COL1A1;MMP2	MMP2;COL1A1
GOBP_MACROPHAGE_CHEMOTAXIS				1.589															2															THBS1;EDNRB
GOBP_ANTIGEN_PROCESSING_AND_PRESENTATION_OF_EXOGENOUS_PEPTIDE_ANTIGEN								2.32	2.489		1.667												3	3		2												FCER1G;FCGR3;LGMN	FCGR3;LGMN;FCER1G		FCER1G;FCGR3
GOBP_SYNAPTIC_MEMBRANE_ADHESION				1.747	1.62								1.551						2	2								2						GPC6;SPARCL1	GPC6;SPARCL1								PCDH17;SPARCL1
GOBP_REGULATION_OF_T_CELL_MEDIATED_IMMUNITY								1.924	2.125		1.668												4	4		3												STX7;FCGR3;NCKAP1L;WAS	WAS;NCKAP1L;FCGR3;CD55		PTPRC;FCGR3;SASH3
GOBP_ACTIN_MEDIATED_CELL_CONTRACTION				1.648	1.485														3	3														FLNA;ACTA2;TPM1	ACTA2;FLNA;TPM1
GOBP_NEGATIVE_REGULATION_OF_NEURON_MIGRATION													2.028	1.504	1.572													2	2	2													COL3A1;ADGRG1	ADGRG1;COL3A1	ADGRG1;COL3A1
GOBP_HETEROPHILIC_CELL_CELL_ADHESION_VIA_PLASMA_MEMBRANE_CELL_ADHESION_MOLECULES															2.07															4															SELP;ITGA5;VCAM1;ICAM1
GOBP_POSITIVE_REGULATION_OF_COLLAGEN_METABOLIC_PROCESS						1.839	1.658	2.32	2.489				1.576								2	2	3	3				2								VIM;ENG	VIM;VSIR	VSIR;VIM;ARRB2	ARRB2;VSIR;VIM				BMP4;VIM
GOBP_REGULATION_OF_HYDROGEN_PEROXIDE_METABOLIC_PROCESS	1.539									1.696						2									2						MPV17L;HP									FYN;RAC2
GOBP_GERMINAL_CENTER_B_CELL_DIFFERENTIATION								2.102	2.228														2	2														SPI1;IRF8	IRF8;SPI1
GOBP_ANTIGEN_RECEPTOR_MEDIATED_SIGNALING_PATHWAY							2.66	5.546	5.207	4.51	8.138	4.586										6	11	10	9	12	8										PRKCB;ICOSL;KLHL6;LAPTM5;NFAM1;NCKAP1L	NCKAP1L;LAPTM5;NFAM1;KLHL6;FCGR3;FYB;IFI205;SYK;ICOSL;THEMIS2;PRKCB	FCGR3;FYB;NFAM1;PRKCB;KLHL6;ICOSL;NCKAP1L;SYK;LAPTM5;THEMIS2	PTPN22;PTPRC;PRKCH;SYK;LAPTM5;LYN;PRKCB;FYN;BCL2	PRKCB;FYB;SYK;LCK;IFI205;FCGR3;FYN;PTPN22;PTPRC;LAPTM5;PRKCH;BCL2	PTPN22;FYB;SYK;PRKCH;LAPTM5;LCK;PTPRC;PRKCB
GOBP_VENTRICULAR_CARDIAC_MUSCLE_TISSUE_MORPHOGENESIS						1.438									1.331						2									3						TPM1;ENG									ENG;TGFBR3;HEG1
GOBP_MAINTENANCE_OF_PROTEIN_LOCATION											1.487															3															SRGN;CCDC88A;FLNA
GOBP_CELLULAR_RESPONSE_TO_INTERFERON_GAMMA							1.464	3.084	4.297		1.444	2.347										3	6	7		3	4										TLR2;VIM;IRF8	VIM;MRC1;WAS;HCK;AIF1;IRF8	WAS;VIM;MRC1;AIF1;TLR2;IRF8;HCK		VIM;GBP5;AIF1	AIF1;TLR2;VIM;HCK
GOBP_METANEPHROS_DEVELOPMENT													3.8															6															SPRY1;BMP4;LAMB2;CD34;PDGFB;SOX17
GOBP_CELL_SURFACE_RECEPTOR_SIGNALING_PATHWAY_INVOLVED_IN_CELL_CELL_SIGNALING					2.26								1.597	2.297	1.377					9								8	16	12					EDNRB;COL1A1;SFRP1;KLF4;SEMA5A;RBMS3;GPC6;RGS4;CPE								HIC1;BMP4;GRB10;KLF4;TIAM1;PRICKLE2;APP;SOX17	EDNRB;BMP4;CSNK1E;TCF7L1;MEF2C;SKI;RELN;KLF4;DAB2;TIAM1;ZEB2;GRB10;CPE;RBMS3;CAV1;APP	WWTR1;MEF2C;DAB2;SOX17;ZEB2;SHANK3;SOX7;HIC1;RELN;CSNK1E;PRICKLE2;KLF4
GOBP_SPECIFICATION_OF_SYMMETRY													1.673															4															BMP4;GJA1;DLL1;SOX17
GOBP_PROSTATE_GLAND_MORPHOGENESIS					1.565															2															MMP2;SFRP1
GOBP_LEUKOCYTE_TETHERING_OR_ROLLING							2.393								1.625							3								3							VCAM1;PTAFR;SELL								SELP;JAM2;VCAM1
GOBP_NEGATIVE_REGULATION_OF_CELL_MATRIX_ADHESION													1.362	1.451	1.533													2	3	3													ADAM15;ACVRL1	ACVRL1;ADAM15;DLC1	ACVRL1;SERPINE1;ADAM15
GOBP_CELL_SUBSTRATE_JUNCTION_ORGANIZATION				1.631	2.127	1.711							1.374	2.069	2.944				3	4	3							3	6	7				LAMC1;THBS1;THY1	THY1;LAMC1;SFRP1;ACTN1	LAMC1;THY1;ACTN1							ITGA6;LIMCH1;ACVRL1	ACVRL1;ITGA6;TEK;DLC1;KDR;ACTN1	ITGA5;ACTN1;LIMCH1;ACVRL1;ITGA6;PEAK1;KDR
GOBP_REGULATION_OF_ORGAN_GROWTH	1.694															4															HAMP;SOD1;PROX1;ACACB
GOBP_POSITIVE_REGULATION_OF_FIBROBLAST_APOPTOTIC_PROCESS										2.293															2															STK17B;BTG1
GOBP_POSITIVE_REGULATION_OF_CELL_GROWTH											1.545															4															S100A9;S100A8;SEMA4D;BCL2
GOBP_TYROSINE_PHOSPHORYLATION_OF_STAT_PROTEIN									1.347	2.139	1.606	1.764												3	4	3	3												IL6RA;HCLS1;CSF1R	HCLS1;FYN;CSF1R;LYN	CSF1R;KIT;FYN	HCLS1;KIT;CSF1R
GOBP_ION_HOMEOSTASIS							1.698		2.291	1.813	1.583	2.712										10		14	12	10	12										PRKCB;GNAI2;TBXAS1;SLC40A1;FKBP1A;CYBA;SLC31A2;CXCR4;PPT1;HMOX1		TBXAS1;SLC11A1;FPR1;S100A8;CD55;SLC31A2;S100A9;PRKCB;CD52;PPT1;SLC40A1;LRRK2;CYBA;GNAI2	CD52;PTPRC;SLC11A1;TMC8;CORO1A;LYN;CXCR4;PTGER2;PRKCB;CCR5;FYN;BCL2	PRKCB;CORO1A;LCK;CD52;FYN;PTPRC;S100A8;CCR5;S100A9;BCL2	FPR1;SLC11A1;CD52;S100A9;CORO1A;TMC8;PTPRC;LCK;S100A8;PRKCB;PTGER2;CCR5
GOBP_REGULATION_OF_SUPEROXIDE_ANION_GENERATION	1.489						2.778	5.013	5.268	2.69	1.758	3.076				2						3	5	5	3	2	3				CRP;SOD1						CYBA;TYROBP;GNAI2	CYBA;GNAI2;SYK;TYROBP;ITGB2	TYROBP;CYBA;SYK;ITGB2;GNAI2	TYROBP;ITGB2;SYK	SYK;TYROBP	TYROBP;SYK;ITGB2
GOBP_AMIDE_BIOSYNTHETIC_PROCESS										2.595															14															RPS19;RPL13;RPL10A;BTG2;RPLP2;RPL27;RPS18;RPS14;RPL27A;RPS15A;VIM;RPL18;RPS12;PABPC4
GOBP_RECEPTOR_CLUSTERING										1.729															3															ITGAL;FLNA;ITGB2
GOBP_MYELOID_LEUKOCYTE_DIFFERENTIATION									1.9	1.519		1.982												6	5		5												TLR2;C1QC;CSF1R;HCLS1;TYROBP;SPI1	TLR2;CSF1R;TYROBP;HCLS1;LYN		KIT;CSF1R;TYROBP;TLR2;HCLS1
GOBP_RESPONSE_TO_EXTRACELLULAR_STIMULUS	2.04							1.408	1.71							10							9	9							XPR1;GHR;HMGCS2;HAMP;ACACB;CAT;ACSL1;SRD5A1;PROX1;SOD1							FOLR2;CYBB;GNAI2;UCP2;CYBA;LRRK2;AIF1;VCAM1;AXL	VCAM1;CYBB;AIF1;AXL;UCP2;LRRK2;CYBA;FOLR2;GNAI2
GOBP_LYMPHATIC_ENDOTHELIAL_CELL_DIFFERENTIATION													2.249	1.691	1.761													2	2	2													TIE1;ACVRL1	TIE1;ACVRL1	ACVRL1;TIE1
GOBP_REGULATION_OF_PROTEIN_KINASE_C_SIGNALING															1.331															2															FLT4;AKAP12
GOBP_IMMATURE_B_CELL_DIFFERENTIATION											2.184	2.333														2	2														KIT;ATM	KIT;ATM
GOBP_VENOUS_BLOOD_VESSEL_DEVELOPMENT						2.038									2.262						2									3						ENG;CCBE1									ACVRL1;ENG;HEG1
GOBP_BONE_MINERALIZATION						1.566															3															COL1A2;MGP;PTH1R
GOBP_REGULATION_OF_SYSTEMIC_ARTERIAL_BLOOD_PRESSURE_MEDIATED_BY_A_CHEMICAL_SIGNAL				1.386		1.438													2		2													TPM1;EDNRB		TPM1;AGTR1A
GOBP_NEGATIVE_REGULATION_OF_MEMBRANE_PERMEABILITY															1.851															2															RASIP1;HEG1
GOBP_GRANULOCYTE_MACROPHAGE_COLONY_STIMULATING_FACTOR_PRODUCTION								1.661	1.791		1.973	2.124											2	2		2	2											CD84;SYK	SYK;CD84		SYK;RASGRP1	SYK;RASGRP1
GOBP_REGULATION_OF_DENDRITIC_CELL_ANTIGEN_PROCESSING_AND_PRESENTATION							2.192	3.309	3.473	2.13	2.248	2.399										2	3	3	2	2	2										FGL2;THBS1	FCGR3;FGL2;SLC11A1	FCGR3;SLC11A1;FGL2	SLC11A1;FGL2	FCGR3;FGL2	SLC11A1;FGL2
GOBP_POSITIVE_REGULATION_OF_NAD_P_H_OXIDASE_ACTIVITY							2.429	2.201	2.336													2	2	2													GNAI2;CYBA	GNAI2;CYBA	CYBA;GNAI2
GOBP_PROTEIN_HOMOTETRAMERIZATION											1.914															3															EVL;SAMHD1;GBP5
GOBP_RESPONSE_TO_AXON_INJURY				1.777	1.611				1.314	3.756	3.162	1.729	1.518						3	3				3	6	5	3	3						FLNA;MMP2;KLF4	MMP2;FLNA;KLF4				KLF4;TYROBP;AIF1	TYROBP;LYN;FLNA;KLF4;AIF1;BCL2	FLNA;KLF4;AIF1;BCL2;TYROBP	AIF1;KLF4;TYROBP	LAMB2;DPYSL3;KLF4
GOBP_REGULATION_OF_ACTIN_FILAMENT_BUNDLE_ASSEMBLY					1.451			1.548		1.844	2.055									3			4		4	4									FLNA;SFRP1;TPM1			CCDC88A;WASF2;PLEK;WAS		PLEK;FLNA;EVL;CCDC88A	EVL;CCDC88A;FLNA;PLEK
GOBP_SMOOTH_MUSCLE_CONTRACTION				1.56	2.719														3	5														ACTA2;EDNRB;PRKG1	EDNRB;MYH11;TBX2;ACTA2;PRKG1
GOBP_SKELETAL_MUSCLE_TISSUE_REGENERATION													1.352															2															ANXA1;GJA1
GOBP_CELL_MIGRATION_INVOLVED_IN_SPROUTING_ANGIOGENESIS							2.498						2.425	3.505	2.187							4						4	7	5							KLF4;HMOX1;ANXA1;THBS1						RHOJ;KLF4;ANXA1;HDAC7	MMRN2;KLF4;EFNB2;CLEC14A;KDR;EPHB4;HDAC7	EPHB4;CLEC14A;MMRN2;KLF4;KDR
GOBP_REGULATION_OF_TOLL_LIKE_RECEPTOR_SIGNALING_PATHWAY									1.439	2.268		1.859												3	4		3												ARRB2;TLR2;CYBA	TLR2;PTPN22;TNFAIP3;LYN		TNFAIP3;TLR2;PTPN22
GOBP_REGULATION_OF_MEMBRANE_PERMEABILITY											1.71															3															GZMB;BCL2;LAPTM5
GOBP_POSITIVE_REGULATION_OF_OLIGODENDROCYTE_DIFFERENTIATION							1.718			1.599												2			2												TLR2;CXCR4			TLR2;CXCR4
GOBP_NEGATIVE_REGULATION_OF_CYTOKINE_PRODUCTION							4.868	6.494	6.34	4.361	3.544	3.255	1.352									11	15	14	11	9	8	5									CD83;TYROBP;LAPTM5;ANXA1;CD84;THBS1;AXL;NCKAP1L;KLF4;HMOX1;VSIR	ANXA1;VSIR;LAPTM5;NCKAP1L;KLF4;CD83;FCGR3;ARRB2;PYCARD;TYROBP;MERTK;VSIG4;CD84;AXL;SLC11A1	FCGR3;SLC11A1;TYROBP;AXL;ARRB2;NCKAP1L;PYCARD;VSIG4;MERTK;LAPTM5;REL;VSIR;KLF4;CD84	PTPN22;PTPRC;NFKB1;SLC11A1;TYROBP;TNFAIP3;LAPTM5;KLF2;ANXA1;CD83;KLF4	SRGN;CD83;KLF2;FCGR3;KLF4;PTPN22;PTPRC;LAPTM5;TYROBP	PTPN22;SLC11A1;TNFAIP3;TYROBP;KLF4;LAPTM5;PTPRC;KLF2	KLF4;DLL1;HDAC7;ANXA1;CD34
GOBP_REGULATION_OF_SUPRAMOLECULAR_FIBER_ORGANIZATION				1.45	2.6		1.977	2.961	2.851	2.018	1.912	2.171							5	8		7	11	10	8	7	7							FLNA;SEMA5A;CDC42EP3;TPM1;AEBP1	SFRP1;SEMA5A;FLNA;CRYAB;TPM1;AEBP1;CDC42EP3;RGS4		PLEK;ARPC1B;COTL1;TMSB10;HCLS1;NCKAP1L;CDC42EP3	NCKAP1L;ARPC1B;CCDC88A;TMSB10;WAS;PYCARD;HCK;PLEK;COTL1;WASF2;CDC42EP3	WAS;COTL1;CCDC88A;HCLS1;ARHGEF10L;PYCARD;NCKAP1L;TMSB10;ARPC1B;HCK	CORO1A;COTL1;CCDC88A;HCLS1;CYFIP2;PLEK;FLNA;EVL	EVL;CCDC88A;CYFIP2;CORO1A;COTL1;FLNA;PLEK	HCK;CCDC88A;CYFIP2;COTL1;CORO1A;EVL;HCLS1
GOBP_REGULATION_OF_METAL_ION_TRANSPORT					1.535		1.405													6		6													CD63;FLNA;FHL1;THY1;FXYD6;RGS4		GNAI2;CD84;FKBP1A;CYBA;SLC31A2;CXCR4
GOBP_REGULATION_OF_RHO_DEPENDENT_PROTEIN_SERINE_THREONINE_KINASE_ACTIVITY														1.984	3.63														2	3														DAB2;RASIP1	DAB2;RASIP1;HEG1
GOBP_CELL_MIGRATION				6.346	5.36	5.858	4.062	9.586	8.308	9.095	8.274	11.429	9.516	10.38	17.481				22	23	20	22	40	35	35	30	33	31	51	59				GPC6;THY1;ADAMTS1;COL5A1;FLNA;SPARC;ACTA2;THBS1;TPM1;COL3A1;EDNRB;COL1A1;MMP2;LAMC1;KLF4;IGFBP5;SEMA5A;PRKG1;LAMB1;CCBE1;FSTL1;CD63	EDNRB;SFRP1;CD63;FLNA;PRKG1;MMP2;THY1;COL3A1;IGFBP5;FSTL1;COL1A1;SPARC;TPM1;ACTA2;COL5A1;ITGA9;LAMC1;LAMB1;KLF4;SEMA5A;IGFBP3;CCBE1;GPC6	LAMC1;ENG;CD63;SERPINE1;IGFBP3;LAMB1;CCBE1;KLF4;IGFBP5;SPARC;THY1;AGTR1A;GPC6;ITGA1;TPM1;MCAM;COL5A1;ADAMTS1;ITGA9;COL1A1	SGK1;SELL;CTSH;ANXA1;GLIPR2;VCAM1;MPP1;PTAFR;PLEKHO1;GNAI2;THBS1;HMOX1;AXL;RAP2B;NCKAP1L;KLF4;PREX1;VSTM4;TMSB10;S100A11;CXCR4;VSIR	PTAFR;S100A11;VSIR;KLF4;SDC3;CSF1R;PYCARD;SPI1;CD44;MERTK;VSTM4;PLEKHO1;ARRB2;MEGF9;FCER1G;AIF1;LRRK2;AXL;CTSH;SRGAP2;ANXA1;FOLR2;NCKAP1L;GLIPR2;GNAI2;HCK;S100A9;VCAM1;S100A8;RAP2B;LGMN;DAB2;CCDC88A;TMSB10;PREX1;SYK;ZEB2;ITGB2;MPP1;WASF2	VCAM1;S100A9;CCDC88A;SDC3;VSTM4;AXL;DAB2;ARRB2;NCKAP1L;SELL;HCK;ZEB2;GNAI2;AIF1;PYCARD;LRRK2;SYK;S100A11;TMSB10;S100A8;RAP2B;LGMN;FCER1G;SGK1;FOLR2;IL6RA;ITGB2;SRGAP2;FGR;CSF1R;PREX1;MERTK;VSIR;KLF4;SPI1	ITGAL;ETS1;FGR;SGK1;CXCR4;AIF1;BCL2;EVL;CD44;CSF1R;TNFAIP3;RAC2;BTG1;STK10;ANXA1;FLNA;ARHGDIB;CORO1A;SYK;CCDC88A;ATM;KLRK1;LYN;CCR5;FYN;SEMA4D;RPS19;FCER1G;PTPRC;PBXIP1;SH3KBP1;ITGB2;ADGRG1;S100A11;KLF4	EVL;KIT;ETS1;ADGRG1;SYK;LCK;FCER1G;ZEB2;S100A8;CCR5;AIF1;CCDC88A;CORO1A;PRKCQ;KLRK1;SH3KBP1;FLNA;PBXIP1;KLF4;SEMA4D;ARHGDIB;FYN;S100A11;PTPRC;S100A9;BCL2;CSF1R;STK10;ATM;CD44	PRKCQ;CCDC88A;S100A9;PBXIP1;ARHGDIB;SYK;CSF1R;SH3KBP1;LCK;STK10;ADGRG1;AIF1;RAC2;BIN2;ITGB2;CORO1A;KLF4;SGK1;KLRK1;FCER1G;HCK;FGR;KIT;EVL;CCR5;ZEB2;SEMA4D;ATM;ITGAL;TNFAIP3;PTPRC;S100A8;S100A11	ADGRG1;RHOJ;GJA1;KLF4;TIAM1;ADAMTS9;SPARC;ICAM1;ACVRL1;COL3A1;CD34;APP;ITGA6;GRB10;LIMCH1;NAV1;ANGPT2;VASH1;GPM6A;TMSB10;HDAC7;NEDD9;TIE1;SOX17;SGK1;BMP4;ADAM15;DPYSL3;LAMB2;ANXA1;PDGFB	ACVRL1;ITGA6;ADAM15;MMRN2;MEF2C;TGFBR3;ACKR3;EFNB2;TIAM1;VCAM1;DLC1;PDGFB;GPM6A;AKAP12;DPYSL3;BMP4;RIPOR1;RELN;KLF4;CLEC14A;LDB2;ITGA9;EPHB4;ADAMTS9;KDR;APP;CDH13;SELP;NAV1;FSCN1;PRCP;ADGRG1;PECAM1;TIE1;PTPRM;DAB2;ZEB2;GRB10;TMSB10;SPARC;CAV1;IGFBP3;SEMA6A;EDNRB;CLDN5;LAMB2;TLR4;TEK;COL3A1;HDAC7;CD34	TMSB10;PLVAP;ECM1;PXN;PLXND1;IGFBP3;CLDN5;ADGRG1;ADAM15;ACVRL1;RELN;ITGA6;CLEC14A;MYO1C;RIPOR1;MEF2C;SPARC;COL3A1;CDH13;SEMA6A;PDGFB;SELP;ROBO4;PTPRM;PRCP;FLT4;ITGA5;DPYSL3;LGMN;ENG;TGFBR3;SERPINE1;NOS3;FLT1;MCAM;SGK1;ICAM1;MMRN2;VCAM1;ADAMTS1;KDR;AKAP12;DAB2;FSCN1;GNAI2;ITGA9;SOX17;EPHB4;PECAM1;ZEB2;TIE1;TLR4;SEMA3F;CDH5;LIMCH1;NEDD9;JAM2;KLF4;PEAK1
GOBP_POSITIVE_REGULATION_OF_MONOCYTE_CHEMOTACTIC_PROTEIN_1_PRODUCTION								1.751	1.887														2	2														CD84;SYK	SYK;CD84
GOBP_POSITIVE_REGULATION_OF_HISTONE_DEACETYLATION								1.415															2															LRRK2;JDP2
GOBP_NEURON_APOPTOTIC_PROCESS										1.349															5															BTG2;CORO1A;TYROBP;ATM;BCL2
GOBP_LENS_FIBER_CELL_DIFFERENTIATION											1.442		1.39													2		2													VIM;MAF		SPRY1;VIM
GOBP_LEUKOCYTE_MIGRATION							3.62	7.594	7.64	7.248	5.804	9.065	1.509		2.951							10	18	17	16	13	16	6		13							MPP1;HMOX1;PTAFR;ANXA1;VCAM1;THBS1;NCKAP1L;CXCR4;PREX1;SELL	ANXA1;PTAFR;FOLR2;NCKAP1L;LGMN;CSF1R;PYCARD;SPI1;PREX1;S100A9;AIF1;FCER1G;HCK;SYK;VCAM1;ITGB2;MPP1;S100A8	VCAM1;S100A8;ITGB2;AIF1;S100A9;LGMN;SELL;CSF1R;FCER1G;PYCARD;NCKAP1L;SYK;FOLR2;PREX1;IL6RA;HCK;SPI1	ITGAL;RPS19;CSF1R;FCER1G;CORO1A;RAC2;SYK;STK10;ITGB2;KLRK1;LYN;ANXA1;CXCR4;CCR5;FYN;AIF1	CSF1R;KIT;CORO1A;SYK;LCK;FCER1G;FYN;STK10;S100A8;CCR5;AIF1;S100A9;KLRK1	AIF1;HCK;RAC2;ITGAL;S100A9;SYK;KIT;CORO1A;CSF1R;ITGB2;LCK;S100A8;KLRK1;CCR5;STK10;FCER1G	ITGA6;ICAM1;ANXA1;CD34;APP;PDGFB		PDGFB;ITGA9;PLVAP;LGMN;SELP;PECAM1;ECM1;SERPINE1;FLT1;ICAM1;ITGA6;JAM2;VCAM1
GOBP_DEFENSE_RESPONSE_TO_SYMBIONT										1.741	2.038	1.722													6	6	5													TLR2;PTPRC;TNFAIP3;FGL2;PTPN22;BCL2	SAMHD1;RNASE6;FGL2;PTPN22;PTPRC;BCL2	PTPN22;TNFAIP3;FGL2;TLR2;PTPRC
GOBP_POSITIVE_REGULATION_OF_MONOCYTE_CHEMOTAXIS								1.661	1.791						1.391								2	2						2								AIF1;LGMN	LGMN;AIF1						LGMN;SERPINE1
GOBP_CALCIUM_ION_TRANSPORT							1.334			1.741	1.668											6			8	7											PRKCB;GNAI2;CD84;FKBP1A;CYBA;CXCR4			PTPRC;CORO1A;LYN;CXCR4;PRKCB;CCR5;FYN;BCL2	PRKCB;CORO1A;LCK;FYN;PTPRC;CCR5;BCL2
GOBP_MYELOID_CELL_DIFFERENTIATION							1.476	1.5	1.791	4.754	2.327	2.648		2.826	1.572							6	8	8	13	8	8		14	10							IRF8;TLR2;HCLS1;C1QC;TYROBP;NCKAP1L	NCKAP1L;TET2;CSF1R;SPI1;C1QC;TYROBP;IRF8;WASF2	TLR2;C1QC;TYROBP;HCLS1;CSF1R;NCKAP1L;IRF8;SPI1	RPS19;CSF1R;ETS1;TLR2;TYROBP;PIP4K2A;KLF2;RPS14;TET2;IKZF1;HCLS1;LYN;PABPC4	CSF1R;KIT;IKZF1;ETS1;KLF2;TET2;PIP4K2A;TYROBP	IKZF1;PIP4K2A;KIT;CSF1R;TYROBP;TLR2;HCLS1;KLF2		TAL1;KLF2;BMP4;MEF2C;TGFBR3;APP;TLR4;MEIS2;TMOD3;ANXA2;ACTN1;SNRK;DLL1;ADGRF5	MEF2C;SNRK;TAL1;ACTN1;TGFBR3;KLF2;TLR4;DLL1;ANXA2;ADGRF5
GOBP_MUSCLE_CONTRACTION				1.543	4.003														5	10														FLNA;ACTA2;TPM1;PRKG1;EDNRB	EDNRB;MYH11;TBX2;FLNA;TPM2;CRYAB;TPM1;MYL9;ACTA2;PRKG1
GOBP_TOLL_LIKE_RECEPTOR_4_SIGNALING_PATHWAY										2.043		1.453													3		2													PTPN22;TNFAIP3;LYN		TNFAIP3;PTPN22
GOBP_RESPONSE_TO_RETINOIC_ACID				2.266	2.711	2.292													4	5	4													IGFBP7;COL1A1;MMP2;KLF4	COL1A1;KLF4;TBX2;MMP2;IGFBP7	TBX2;COL1A1;IGFBP7;KLF4
GOBP_TUMOR_NECROSIS_FACTOR_MEDIATED_SIGNALING_PATHWAY								1.628				1.59											4				3											PYCARD;SYK;LAPTM5;LIMS1				TNFAIP3;SYK;LAPTM5
GOBP_DETOXIFICATION	3.515				1.338											7				3											HP;FABP1;CAT;ADH4;MGST1;SOD1;ALDH1A7				FBLN5;SOD3;PXDN
GOBP_MAST_CELL_ACTIVATION_INVOLVED_IN_IMMUNE_RESPONSE									1.698	2.603	1.95	4.165												3	4	3	5												SYK;CD84;FGR	FGR;RAC2;LYN;SYK	SYK;KIT;RASGRP1	FGR;RAC2;SYK;RASGRP1;KIT
GOBP_REGULATION_OF_NEUTROPHIL_CHEMOTAXIS							1.499															2															MPP1;NCKAP1L
GOBP_REGULATION_OF_RAS_PROTEIN_SIGNAL_TRANSDUCTION											1.344															4															CDC42SE2;RASGRP1;ADGRG1;ARHGDIB
GOBP_REGULATION_OF_NATURAL_KILLER_CELL_MEDIATED_IMMUNITY											1.357	1.47														2	2														RASGRP1;KLRK1	KLRK1;RASGRP1
GOBP_NITRIC_OXIDE_SYNTHASE_BIOSYNTHETIC_PROCESS							1.741	1.446	2.638				1.636	3.967	4.197							2	2	3				2	5	5							TLR2;NAMPT	LRRK2;NAMPT	NAMPT;LRRK2;TLR2				NAMPT;IL33	AKAP12;NAMPT;TLR4;KDR;IL33	NAMPT;AKAP12;TLR4;IL33;KDR
GOBP_MUSCLE_ORGAN_DEVELOPMENT					1.725								1.996	2.297	1.447					6								7	12	9					COL6A3;FOS;FHL1;CRYAB;TPM1;COL3A1								BMP4;GJA1;DLL1;SMTN;COL3A1;SELENON;FKBP1A	BMP4;SMTN;MEF2C;SKI;TGFBR3;CAV2;FHL1;YBX3;SELENON;COL3A1;CAV1;DLL1	MEF2C;SMTN;SELENON;ENG;TGFBR3;CAV2;DLL1;HEG1;COL3A1
GOBP_REGULATION_OF_BINDING													3.559	3.481	1.659													10	15	10													NES;BMP4;ANXA2;ADAM15;ZFP462;KLF4;TIAM1;FKBP1A;APP;PDGFB	BMP4;CLDN5;CSNK1E;ADAM15;SKI;TGFBR3;KLF4;DAB2;TIAM1;NES;ANXA2;PDGFB;ZFP462;CAV1;APP	DAB2;PDGFB;TGFBR3;PLXND1;ADAM15;SOX7;CLDN5;ANXA2;CSNK1E;KLF4
GOBP_NEGATIVE_REGULATION_OF_MACROPHAGE_ACTIVATION								1.585	1.708		1.888				1.331								2	2		2				2								FCGR3;VSIG4	FCGR3;VSIG4		PTPRC;FCGR3				FCGR3;ADGRF5
GOBP_REGULATION_OF_RESPONSE_TO_EXTERNAL_STIMULUS							1.366	5.349	5.762	8.612	7.707	7.843		1.949	2.343							10	24	23	27	23	22		21	21							MPP1;TYROBP;FGL2;ANXA1;TLR2;THBS1;CYBA;NCKAP1L;CXCR4;KLF4	KLF4;FCGR3;FGL2;CSF1R;PYCARD;SPI1;VSIG4;ARRB2;IFI205;AIF1;LRRK2;ANXA1;NCKAP1L;CYBA;HCK;S100A9;S100A8;LGMN;SAMHD1;LY86;TYROBP;SYK;METRNL;MPP1	CD55;S100A9;ARRB2;NCKAP1L;HCK;FCGR3;AIF1;PYCARD;LRRK2;SYK;CYBA;S100A8;TLR2;LGMN;IL6RA;LY86;FGR;CSF1R;TYROBP;FGL2;VSIG4;KLF4;SPI1	ETS1;TLR2;AOAH;NFKB1;ALOX5AP;FGR;CXCR4;PTPN22;AIF1;CSF1R;TYROBP;TNFAIP3;RAC2;FGL2;ANXA1;FLNA;SYK;ATM;NCF1;KLRK1;LYN;FYN;SEMA4D;AKNA;RPS19;PTPRC;KLF4	ETS1;SYK;IFI205;FCGR3;PTPN22;S100A8;AIF1;RASGRP1;SAMHD1;AKNA;AOAH;KLRK1;FLNA;KLF4;SEMA4D;FYN;PTPRC;S100A9;GBP5;TYROBP;CSF1R;ATM;FGL2	S100A9;SYK;CSF1R;AOAH;AIF1;RAC2;FGL2;KLF4;KLRK1;HCK;ALOX5AP;FGR;SEMA4D;PTPN22;ATM;TNFAIP3;RASGRP1;TYROBP;TLR2;PTPRC;S100A8;AKNA		EFNB2;CD34;PDGFB;IL33;KLF4;KDR;APP;CDH13;CALCRL;TFPI;SEC14L1;MMRN1;CAV1;SEMA6A;EDNRB;PTGIS;MAPK7;TLR4;TEK;FCGR3;DNASE1L3	CALCRL;PTGIS;DNASE1L3;C1QTNF1;MAPK7;PDGFB;SEMA6A;CDH13;IL33;SEC14L1;LGMN;SERPINE1;NOS3;KDR;CD55;SEMA3F;TLR4;CDH5;FCGR3;TFPI;KLF4
GOBP_POSITIVE_REGULATION_OF_LIPASE_ACTIVITY								1.351															3															PTAFR;PLCB2;CD86
GOBP_REGULATION_OF_INTRINSIC_APOPTOTIC_SIGNALING_PATHWAY_IN_RESPONSE_TO_DNA_DAMAGE_BY_P53_CLASS_MEDIATOR										1.813	1.93														2	2														CD44;BCL2	CD44;BCL2
GOBP_NEGATIVE_REGULATION_OF_VASCULATURE_DEVELOPMENT				3.939		3.058							4.088	5.077	4.668				6		5							7	11	10				COL4A2;THBS2;SPARC;KLF4;THBS1;ADAMTS1		SPARC;THBS2;SERPINE1;ADAMTS1;KLF4							ANGPT2;COL4A2;VASH1;KLF4;ADAMTS9;SPARC;TIE1	KLF2;NPR1;CLDN5;STAB1;KLF4;TIE1;PTPRM;TEK;SPARC;ADAMTS9;SEMA6A	STAB1;SPARC;SEMA6A;KLF2;TIE1;SERPINE1;PTPRM;CLDN5;KLF4;ADAMTS1
GOBP_REGULATION_OF_CELLULAR_COMPONENT_BIOGENESIS							1.553	1.772	1.641	2.543	2.439	3.845	1.504	2.549	2.724							11	16	14	16	14	16	11	24	23							PLEK;ARPC1B;COTL1;TMSB10;TLR2;FBLIM1;HCLS1;THBS1;NCKAP1L;CDC42EP3;LIMS1	NCKAP1L;SRGAP2;ARPC1B;CCDC88A;WAS;TMSB10;LIMS1;PYCARD;FBLIM1;HCK;SYK;PLEK;COTL1;LRRK2;WASF2;CDC42EP3	WAS;SRGAP2;COTL1;CCDC88A;TLR2;HCLS1;ARHGEF10L;PYCARD;NCKAP1L;LRRK2;SYK;TMSB10;ARPC1B;HCK	TLR2;CORO1A;TMC8;PRKCH;COTL1;RAC2;PIP4K2A;ATM;SYK;CCDC88A;HCLS1;CYFIP2;PLEK;FLNA;SEMA4D;EVL	EVL;KIT;CCDC88A;CYFIP2;CORO1A;COTL1;FLNA;SYK;PLEK;SEMA4D;PIP4K2A;ATM;PRKCH;GBP5	HCK;RAC2;CCDC88A;ATM;CYFIP2;SYK;COTL1;KIT;CORO1A;PRKCH;TMC8;TLR2;PIP4K2A;EVL;HCLS1;SEMA4D	PALM;GPM6A;ACVRL1;TMSB10;CDC42EP3;DPYSL3;ICAM1;LIMCH1;SMAD6;APP;TIE1	TAL1;ACVRL1;MEF2C;CDC42EP3;TMOD3;DLC1;RASIP1;GPM6A;DPYSL3;ESAM;KDR;LDB2;APP;SMAD6;SELP;ADD3;FSCN1;TIE1;TMSB10;CAV1;CLDN5;TLR4;TEK;PALM	TMSB10;RASIP1;CLDN5;MYO1C;SMAD6;ACVRL1;MEF2C;SELP;SOX7;ADD3;ESAM;DPYSL3;ICAM1;SHANK3;KDR;FSCN1;TAL1;TIE1;TLR4;CDH5;LIMCH1;PXN;PEAK1
GOBP_REGULATION_OF_CYTOSKELETON_ORGANIZATION							1.382	3.242	3.267	2.512	3.047	4.068										7	14	13	11	11	12										PLEK;ARPC1B;COTL1;TMSB10;HCLS1;NCKAP1L;CDC42EP3	NCKAP1L;S100A8;ARPC1B;CCDC88A;CSF1R;WAS;TMSB10;PYCARD;HCK;S100A9;PLEK;COTL1;WASF2;CDC42EP3	WAS;S100A8;S100A9;COTL1;CCDC88A;HCLS1;CSF1R;ARHGEF10L;PYCARD;NCKAP1L;TMSB10;ARPC1B;HCK	ARHGDIB;CSF1R;CORO1A;COTL1;RAC2;CCDC88A;HCLS1;CYFIP2;PLEK;FLNA;EVL	EVL;CSF1R;CCDC88A;CYFIP2;CORO1A;COTL1;FLNA;PLEK;ARHGDIB;S100A8;S100A9	HCK;RAC2;CCDC88A;ARHGDIB;S100A9;CYFIP2;COTL1;CSF1R;CORO1A;EVL;S100A8;HCLS1
GOBP_CELL_CHEMOTAXIS						1.398	2.45	7.475	7.364	6.073	5.166	8.451									4	7	16	15	13	11	14									SERPINE1;ITGA1;ITGA9;AGTR1A	MPP1;THBS1;ANXA1;VCAM1;NCKAP1L;CXCR4;PREX1	ANXA1;FOLR2;NCKAP1L;LGMN;CSF1R;ARRB2;SPI1;PREX1;S100A9;AIF1;FCER1G;SYK;VCAM1;ITGB2;MPP1;S100A8	VCAM1;S100A8;AIF1;S100A9;LGMN;CSF1R;FCER1G;ARRB2;NCKAP1L;FOLR2;SYK;PREX1;IL6RA;ITGB2;SPI1	RPS19;CSF1R;FCER1G;CORO1A;RAC2;SYK;ITGB2;KLRK1;LYN;ANXA1;CXCR4;CCR5;AIF1	CSF1R;KIT;CORO1A;FCER1G;SYK;PRKCQ;S100A8;CCR5;AIF1;S100A9;KLRK1	AIF1;RAC2;PRKCQ;S100A9;BIN2;SYK;KIT;CORO1A;CSF1R;ITGB2;S100A8;KLRK1;CCR5;FCER1G
GOBP_TRABECULA_MORPHOGENESIS				2.275	2.069	2.291									1.985				3	3	3									4				ADAMTS1;COL1A1;MMP2	MMP2;COL1A1;SFRP1	COL1A1;ADAMTS1;ENG									ENG;TGFBR3;HEG1;ADAMTS1
GOBP_BRANCHED_CHAIN_AMINO_ACID_CATABOLIC_PROCESS	1.489		1.489													2		2													ACADSB;ALDH6A1		ACADSB;ALDH6A1
GOBP_POSITIVE_REGULATION_OF_MELANOCYTE_DIFFERENTIATION											2.739			1.984												2			2												ZEB2;BCL2			ZEB2;ADAMTS9
GOBP_MYELOID_LEUKOCYTE_MEDIATED_IMMUNITY							2.04	3.674	4.027	3.297	2.765	4.928										4	7	7	6	5	7										CD84;PTAFR;HMOX1;TYROBP	PTAFR;FCGR3;SPI1;SYK;TYROBP;CD84;ITGB2	FCGR3;FGR;TYROBP;SYK;ITGB2;CD84;SPI1	TYROBP;RAC2;SYK;ITGB2;FGR;LYN	KIT;RASGRP1;SYK;FCGR3;TYROBP	FGR;RAC2;SYK;RASGRP1;KIT;ITGB2;TYROBP
GOBP_POST_EMBRYONIC_ANIMAL_ORGAN_DEVELOPMENT				1.972	1.845	2.006									1.331				2	2	2									2				FBN1;KLF4	FBN1;KLF4	FBN1;KLF4									KLF4;KDR
GOBP_CARDIAC_EPITHELIAL_TO_MESENCHYMAL_TRANSITION													3.214	2.131	2.281													4	4	4													ADAM15;SPRY1;BMP4;ACVRL1	ACVRL1;TGFBR3;BMP4;ADAM15	ACVRL1;ENG;TGFBR3;ADAM15
GOBP_REGULATION_OF_PHOSPHOLIPASE_ACTIVITY							2.556	2.919														4	5														PLCB2;PPT1;PTAFR;ANXA1	PTAFR;ANXA1;PLCB2;CD86;PPT1
GOBP_PROTEIN_DEPHOSPHORYLATION											1.375															5															PTPN4;LCK;PTPN22;PTPRC;BCL2
GOBP_REGULATION_OF_RECEPTOR_LOCALIZATION_TO_SYNAPSE								1.585															2															STX7;TYROBP
GOBP_CYTOSOLIC_TRANSPORT											1.495															4															FLNA;LAPTM5;PIP4K2A;CORO1A
GOBP_NAD_BIOSYNTHESIS_VIA_NICOTINAMIDE_RIBOSIDE_SALVAGE_PATHWAY													2.088	1.563	1.625													2	2	2													PTGIS;NAMPT	NAMPT;PTGIS	PTGIS;NAMPT
GOBP_POSITIVE_REGULATION_OF_INNATE_IMMUNE_RESPONSE								2.523	2.103	2.921	4.103	2.745											6	5	6	7	5											IFI205;PYCARD;SPI1;HCK;TYROBP;SYK	TYROBP;PYCARD;SYK;HCK;SPI1	RPS19;TYROBP;SYK;KLRK1;LYN;FYN	RASGRP1;KLRK1;SYK;IFI205;FYN;GBP5;TYROBP	HCK;SYK;RASGRP1;TYROBP;KLRK1
GOBP_LAMELLIPODIUM_ASSEMBLY								1.977	1.45			1.872											4	3			3											CCDC88A;WASF2;SRGAP2;WAS	WAS;SRGAP2;CCDC88A			RAC2;KIT;CCDC88A
GOBP_ESTABLISHMENT_OF_ENDOTHELIAL_BARRIER															2.593															5															PECAM1;CLDN5;ROBO4;CDH5;ICAM1
GOBP_CELL_PROJECTION_ORGANIZATION				2.462	2.087			1.933	1.737	2.322	3.192	2.288	1.689	1.807	1.427				15	16			23	20	21	21	17	16	30	26				MMP2;FLNA;KLF4;ITM2C;NOTCH3;SEMA5A;THY1;CDC42EP3;TPM1;ENAH;EMP1;ITGA8;VIM;LAMB1;PRKG1	VIM;SFRP1;KLF4;LAMB1;SEMA5A;FLNA;ITGA8;NOTCH3;MMP2;THY1;ENAH;TPM1;CDC42EP3;EMP1;ITM2C;PRKG1			KLF4;FCGR3;CSF1R;PLEK;CD44;PLEKHO1;AIF1;LRRK2;SRGAP2;S100A6;NCKAP1L;FGD2;PARVG;S100A9;EPB41L3;CDC42EP3;VIM;RAP2B;LGMN;DAB2;CCDC88A;WAS;WASF2	WAS;VIM;S100A9;CCDC88A;DAB2;NCKAP1L;PARVG;FCGR3;AIF1;S100A6;LRRK2;RAP2B;EPB41L3;LGMN;SGK1;FGD2;SRGAP2;CSF1R;LST1;KLF4	SGK1;CXCR4;EVL;AIF1;BCL2;MBP;CD44;BTG2;CSF1R;RAC2;CYFIP2;PLEK;FLNA;LST1;VIM;CORO1A;CCDC88A;LYN;FYN;SEMA4D;KLF4	EVL;KIT;CYFIP2;FCGR3;AIF1;TOX;CCDC88A;CORO1A;PRKCQ;GPRIN3;FLNA;PLEK;KLF4;SEMA4D;FYN;MBP;S100A9;BCL2;CSF1R;VIM;CD44	AIF1;RAC2;PRKCQ;CCDC88A;S100A9;CYFIP2;VIM;KIT;CSF1R;CORO1A;KLF4;SGK1;MBP;EVL;LST1;TOX;SEMA4D	PALM;SGK1;ITGA6;EMP1;GPM6A;VIM;RHOJ;NES;KLF4;TIAM1;CDC42EP3;ICAM1;DPYSL3;LAMB2;EHD2;APP	ITGA6;MEF2C;CDC42EP3;PREX2;EFNB2;TIAM1;KLF7;FGD5;GPM6A;DPYSL3;RPGR;RELN;KLF4;EPHB4;APP;CDH13;FSCN1;EMP1;DAB2;PTPRM;VIM;HECW2;CAV1;SEMA6A;LAMB2;EHD2;NRN1;NES;FCGR3;PALM	RPGR;KLF7;PLXND1;EHD4;HERC1;ITGA6;RELN;MEF2C;CDH13;SEMA6A;ROBO4;PTPRM;WWTR1;DPYSL3;LGMN;SGK1;ICAM1;DAB2;FSCN1;EPHB4;SEMA3F;VIM;FCGR3;SHANK3;PREX2;KLF4
GOBP_POSITIVE_REGULATION_OF_CELLULAR_COMPONENT_ORGANIZATION								2.865	2.038	2.304	3.888	3.525	2.283	1.976	1.396								20	16	16	18	16	14	23	19								PYCARD;PLEK;GZMB;ARRB2;LRRK2;AXL;PPT1;ANXA1;NCKAP1L;RAB31;HCK;S100A9;CDC42EP3;DAB2;CCDC88A;WAS;LIMS1;SYK;TYROBP;WASF2	RAB31;WAS;S100A9;CCDC88A;PPT1;HCLS1;TYROBP;AXL;ARRB2;DAB2;NCKAP1L;LRRK2;SYK;ARHGEF10L;PYCARD;HCK	TYROBP;RAC2;CCDC88A;SYK;PIP4K2A;ATM;HCLS1;RAB31;PLEK;LYN;ANXA1;CD53;FLNA;FYN;SEMA4D;EVL	EVL;KIT;CCDC88A;TOX;FLNA;SYK;RAB31;PLEK;SEMA4D;FYN;PRKCQ;PIP4K2A;ATM;GZMB;S100A9;CD53;GBP5;TYROBP	HCK;RAC2;PRKCQ;CCDC88A;ATM;S100A9;SYK;PIP4K2A;KIT;CD53;TYROBP;EVL;HCLS1;RAB31;TOX;SEMA4D	PALM;ITGA6;NES;GPM6A;ANXA2;DLL1;TIAM1;CDC42EP3;DPYSL3;LIMCH1;ANXA1;EHD2;APP;PDGFB	TAL1;ITGA6;CDC42EP3;TIAM1;ANXA2;PDGFB;RASIP1;DSTN;GPM6A;DLL1;DPYSL3;RELN;KDR;APP;FSCN1;DAB2;CAV1;CLDN5;EHD2;TLR4;NES;TEK;PALM	PLXND1;RASIP1;CLDN5;ANXA2;ITGA6;RELN;PDGFB;DLL1;DPYSL3;SERPINE1;SHANK3;KDR;DAB2;FSCN1;TAL1;TLR4;CDH5;LIMCH1;PXN
GOBP_VASCULAR_ASSOCIATED_SMOOTH_MUSCLE_CELL_DEVELOPMENT															1.572															2															ENG;RAMP2
GOBP_EPITHELIAL_TUBE_MORPHOGENESIS													2.511	2.304	1.791													8	12	10													SPRY1;COL4A1;BMP4;GJA1;DLL1;ACVRL1;TIE1;SOX17	ACVRL1;BMP4;MMRN2;MEF2C;SKI;TIE1;EFNB2;LUZP1;DLC1;KDR;RASIP1;DLL1	MEF2C;SOX17;ENG;PLXND1;TIE1;RASIP1;DLL1;ACVRL1;MMRN2;KDR
GOBP_THYMIC_T_CELL_SELECTION											1.726	1.861														2	2														PTPRC;TOX	TOX;PTPRC
GOBP_POSITIVE_REGULATION_OF_DEFENSE_RESPONSE								3.34	3.78	3.325	4.511	4.202											10	10	9	10	9											CYBA;IFI205;PYCARD;SPI1;HCK;S100A9;TYROBP;SYK;LRRK2;S100A8	S100A8;S100A9;TLR2;TYROBP;PYCARD;LRRK2;SYK;CYBA;HCK;SPI1	RPS19;TLR2;ETS1;TYROBP;SYK;ALOX5AP;KLRK1;LYN;FYN	ETS1;RASGRP1;KLRK1;SYK;IFI205;FYN;S100A8;S100A9;GBP5;TYROBP	HCK;ALOX5AP;S100A9;SYK;RASGRP1;TYROBP;TLR2;S100A8;KLRK1
GOBP_REGULATION_OF_P38MAPK_CASCADE										1.946		2.302													3		3													PTPN22;NCF1;GADD45B		PTPN22;RASGRP1;GADD45B
GOBP_REGULATION_OF_EXTRINSIC_APOPTOTIC_SIGNALING_PATHWAY_VIA_DEATH_DOMAIN_RECEPTORS												1.333			1.947												2			4												TNFAIP3;TMC8			PEA15A;SERPINE1;NOS3;ICAM1
GOBP_COLLAGEN_FIBRIL_ORGANIZATION				9.436	8.845	5.493							2.517	1.563					9	9	6							4	4					COL14A1;COL1A1;PXDN;LUM;AEBP1;COL1A2;COL5A1;COL3A1;ADAMTS2	COL1A1;COL14A1;PXDN;COL5A1;LUM;COL1A2;AEBP1;COL3A1;ADAMTS2	COL1A2;PXDN;COL5A1;LUM;ADAMTS2;COL1A1							COL3A1;SERPINH1;PXDN;CRTAP	SERPINH1;COL3A1;PXDN;CRTAP
GOBP_NEGATIVE_REGULATION_OF_ERK1_AND_ERK2_CASCADE														2.003	1.558														5	4														SPRY4;DAB2;CNKSR3;TLR4;SEMA6A	SEMA6A;DAB2;CNKSR3;TLR4
GOBP_BRANCHING_MORPHOGENESIS_OF_AN_EPITHELIAL_TUBE													1.529															4															SPRY1;COL4A1;BMP4;TIE1
GOBP_CELL_ACTIVATION_INVOLVED_IN_IMMUNE_RESPONSE							3.04	6.775	6.616	6.122	3.714	7.591										8	15	14	13	9	13										FGL2;PTAFR;ANXA1;CD84;NCKAP1L;TYROBP;IRF8;HMOX1	ANXA1;PTAFR;NCKAP1L;FCGR3;FGL2;PYCARD;SPI1;FCER1G;TYROBP;SYK;ITGB2;CD84;IRF8;SLC11A1;CD86	FCGR3;SLC11A1;FGR;TYROBP;FCER1G;PYCARD;NCKAP1L;IRF8;SYK;FGL2;IL6RA;ITGB2;CD84;SPI1	ITGAL;FCER1G;PTPRC;SLC11A1;TYROBP;CORO1A;RAC2;SYK;FGL2;ITGB2;FGR;LYN;ANXA1	KIT;RASGRP1;CORO1A;SYK;FCER1G;FCGR3;FGL2;PTPRC;TYROBP	FGR;SLC11A1;RAC2;ITGAL;SYK;RASGRP1;KIT;CORO1A;FGL2;TYROBP;ITGB2;PTPRC;FCER1G
GOBP_POSITIVE_REGULATION_OF_CHEMOKINE_PRODUCTION							1.757	2.868	5.142	3.221	2.543	3.8										3	5	7	5	4	5										TLR2;CD84;HMOX1	CSF1R;PYCARD;SYK;AIF1;CD84	AIF1;TLR2;CSF1R;PYCARD;SYK;IL6RA;CD84	TLR2;CSF1R;SYK;AIF1;MBP	SYK;MBP;CSF1R;AIF1	AIF1;SYK;CSF1R;MBP;TLR2
GOBP_LEUKOCYTE_AGGREGATION								3.003	1.887	4.69	6.735	7.011											3	2	4	5	5											S100A9;S100A8;CD44	S100A8;S100A9	STK10;CD44;SEMA4D;RAC2	SEMA4D;STK10;S100A8;S100A9;CD44	RAC2;S100A9;S100A8;STK10;SEMA4D
GOBP_SPROUTING_ANGIOGENESIS				1.871		1.979	2.826						4.423	8.443	8.115				4		4	6						8	16	15				CCBE1;THBS1;SEMA5A;KLF4		AGTR1A;ENG;CCBE1;KLF4	THBS1;PKM;ANXA1;HMOX1;KLF4;VSTM4						BMP4;RHOJ;KLF4;DLL1;ADAMTS9;HDAC7;ACVRL1;ANXA1	CDH13;ACVRL1;KLF2;BMP4;MMRN2;KLF4;RAMP2;EFNB2;TEK;CLEC14A;KDR;EPHB4;ADAMTS9;HDAC7;DLL1;SEMA6A	FLT4;ITGA5;RAMP2;CDH13;SEMA6A;EPHB4;ENG;KLF2;KLF4;DLL1;ACVRL1;CLEC14A;MMRN2;CEMIP2;KDR
GOBP_REGULATION_OF_CATION_TRANSMEMBRANE_TRANSPORT					1.7															6															CD63;FLNA;FHL1;THY1;FXYD6;RGS4
GOBP_NEURON_PROJECTION_GUIDANCE														1.539	1.692														8	8														LAMB2;RELN;APP;PTPRM;EFNB2;KLF7;EPHB4;SEMA6A	SEMA6A;KLF7;SEMA3F;EPHB4;ROBO4;PLXND1;PTPRM;RELN
GOBP_POSITIVE_REGULATION_OF_CELLULAR_BIOSYNTHETIC_PROCESS													1.352	1.735	2.021													17	35	34													ITGA6;NAMPT;BMP4;VIM;ZFP462;CEBPD;KLF4;DLL1;MECOM;ACVRL1;PDGFB;SMAD6;ANXA1;LMO2;APP;IL33;SOX17	TAL1;ACVRL1;ITGA6;ERG;NCOA7;MEF2C;NAMPT;KLF7;PDGFB;IL33;DLL1;MAF;ADGRF5;MECOM;BMP4;KLF4;ELK3;MEIS2;LDB2;LMO2;SMAD6;APP;CDH13;SKI;PLAC8;DAB2;ZEB2;YBX3;VIM;KLF2;KDM6B;MAPK7;TLR4;ACTN1;ZFP462	NAMPT;ERG;KLF7;PLAC8;SMAD6;ITGA6;ACVRL1;MEF2C;MAPK7;CDH13;PDGFB;DLL1;SOX7;IL33;WWTR1;MAF;ETS2;ENG;TCF4;NOS3;ADGRF5;DAB2;TAL1;SOX17;ACTN1;ZEB2;KLF2;TLR4;KDM6B;CEBPD;NCOA7;VIM;TCERG1;KLF4
GOBP_POSITIVE_REGULATION_OF_OXIDOREDUCTASE_ACTIVITY
GOBP_AMYLOID_FIBRIL_FORMATION													1.441															2															FKBP1A;APP
GOBP_REGULATION_OF_ORGANELLE_ORGANIZATION								2.081	1.713	1.411	2.606	3.114											19	16	14	16	16											CSF1R;PYCARD;PLEK;GZMB;ARPC1B;ARRB2;COTL1;LRRK2;ANXA1;NCKAP1L;HCK;S100A9;S100A8;CDC42EP3;CCDC88A;TMSB10;WAS;ZEB2;WASF2	WAS;S100A8;S100A9;COTL1;CCDC88A;HCLS1;CSF1R;ARHGEF10L;ARRB2;NCKAP1L;PYCARD;LRRK2;TMSB10;ARPC1B;HCK;ZEB2	ARHGDIB;CSF1R;CORO1A;COTL1;RAC2;CCDC88A;PIP4K2A;ATM;HCLS1;ANXA1;CYFIP2;PLEK;FLNA;EVL	EVL;CSF1R;CCDC88A;CYFIP2;CORO1A;COTL1;FLNA;PLEK;ARHGDIB;ZEB2;PRKCQ;S100A8;PIP4K2A;ATM;GZMB;S100A9	HCK;RAC2;CCDC88A;ARHGDIB;ATM;CYFIP2;PRKCQ;S100A9;COTL1;PIP4K2A;CSF1R;CORO1A;EVL;S100A8;HCLS1;ZEB2
GOBP_VENOUS_BLOOD_VESSEL_MORPHOGENESIS						2.351									1.684						2									2						ENG;CCBE1									ENG;HEG1
GOBP_REGULATION_OF_NEUTROPHIL_DEGRANULATION								5.301	3.76	2.293		2.575											4	3	2		2											PTAFR;SPI1;SYK;ITGB2	ITGB2;SYK;SPI1	ITGB2;SYK		SYK;ITGB2
GOBP_INTRINSIC_APOPTOTIC_SIGNALING_PATHWAY											1.809															6															LCK;S100A8;ATM;S100A9;CD44;BCL2
GOBP_POSITIVE_REGULATION_OF_SPROUTING_ANGIOGENESIS							1.718	1.415	1.535				1.616		1.964							2	2	2				2		3							KLF4;PKM	KLF4;PKM	PKM;KLF4				KLF4;DLL1		ITGA5;DLL1;KLF4
GOBP_POSITIVE_REGULATION_OF_INTRACELLULAR_TRANSPORT										1.573															5															RAC2;HCLS1;ITGB2;FLNA;FYN
GOBP_POSITIVE_REGULATION_OF_TRANSFORMING_GROWTH_FACTOR_BETA1_PRODUCTION				2.598															2															LUM;THBS1
GOBP_RESPONSE_TO_TEMPERATURE_STIMULUS	1.585						1.473									5						4									CHORDC1;CPB2;HMGCS2;DNAJA1;SOD1						CXCR4;IER5;HMOX1;THBS1
GOBP_SMALL_GTPASE_MEDIATED_SIGNAL_TRANSDUCTION								1.595	1.567	2.563	2.588	2.969	1.374	1.867	1.823								10	9	11	10	10	7	14	13								FGD2;RAP2B;SRGAP2;CCDC88A;WAS;PREX1;RGL1;AIF1;WASF2;CDC42EP3	WAS;SRGAP2;RGL1;AIF1;RAP2B;CCDC88A;ARHGEF10L;PREX1;FGD2	ARHGAP30;ARHGAP25;ARHGDIB;TAGAP1;ARHGAP45;RAC2;CCDC88A;CDC42SE2;ARHGAP9;ADGRG1;AIF1	CCDC88A;RASGRP1;ADGRG1;ARHGAP30;TAGAP1;ARHGAP25;ARHGDIB;CDC42SE2;AIF1;ARHGAP9	AIF1;ARHGAP25;RAC2;ARHGAP9;CCDC88A;ARHGDIB;ARHGAP30;ARHGAP45;RASGRP1;ADGRG1	SPRY1;ADGRG1;RHOJ;SH2D3C;TIAM1;CDC42EP3;COL3A1	CDH13;ARHGAP23;RIPOR1;SPRY4;RAPGEF5;CDC42EP3;PREX2;ADGRG1;RELN;TIAM1;DLC1;FGD5;COL3A1;RASIP1	RAPGEF5;RELN;COL3A1;SH2D3C;CDH13;PLEKHG1;ARHGAP31;ARHGAP23;RASIP1;HEG1;ADGRG1;PREX2;RIPOR1
GOBP_POSITIVE_REGULATION_OF_CELLULAR_COMPONENT_BIOGENESIS								1.318		1.422	2.194	2.516		1.649									9		8	9	9		13									NCKAP1L;CCDC88A;LIMS1;PYCARD;HCK;SYK;PLEK;WASF2;CDC42EP3		RAC2;CCDC88A;SYK;PIP4K2A;ATM;PLEK;SEMA4D;EVL	EVL;KIT;CCDC88A;SYK;PLEK;SEMA4D;PIP4K2A;ATM;GBP5	HCK;RAC2;CCDC88A;ATM;SYK;PIP4K2A;KIT;EVL;SEMA4D		TAL1;DPYSL3;CLDN5;FSCN1;CDC42EP3;TLR4;TEK;KDR;LDB2;RASIP1;CAV1;GPM6A;PALM
GOBP_REGULATION_OF_LEUKOCYTE_MEDIATED_IMMUNITY							1.744	4.693	5.191	3.821	3.59	5.642										5	11	11	9	8	10										PTAFR;CD84;NCKAP1L;TYROBP;HMOX1	PTAFR;NCKAP1L;STX7;FCGR3;ARRB2;WAS;SPI1;SYK;TYROBP;CD84;ITGB2	FCGR3;WAS;CD55;FGR;TYROBP;ARRB2;NCKAP1L;SYK;ITGB2;CD84;SPI1	PTPRC;TYROBP;RAC2;SYK;SASH3;ITGB2;KLRK1;FGR;LYN	KIT;RASGRP1;SYK;FCGR3;PTPRC;KLRK1;TYROBP;SASH3	FGR;RAC2;SYK;RASGRP1;KIT;ITGB2;SASH3;TYROBP;PTPRC;KLRK1
GOBP_TUBE_DEVELOPMENT	1.345			4.882	2.488	4.281	1.855			2.086	1.42		8.693	13.976	17.271	14			17	14	15	13			16	12		26	49	51	AR;AHI1;HC;ID2;HMGCS2;HRG;ERRFI1;LRG1;CAT;ANGPTL3;ANGPTL4;STAT3;PROX1;APOB			COL4A2;THBS2;MMP2;COL4A1;CCBE1;SPARC;FLNA;KLF4;IGFBP5;NOTCH3;THBS1;THY1;SEMA5A;ADAMTS1;COL3A1;ADAMTS2;EDNRB	EDNRB;SFRP1;KLF4;TBX2;SPARC;FLNA;SEMA5A;NOTCH3;CCBE1;MMP2;THY1;COL3A1;IGFBP5;ADAMTS2	IGFBP5;MCAM;SPARC;THY1;ENG;THBS2;NOTCH3;SERPINE1;ADAMTS1;AGTR1A;TBX2;ADGRF5;CCBE1;KLF4;ADAMTS2	PRKCB;CTSH;BASP1;CYBB;PKM;ANXA1;VSTM4;TNFAIP2;THBS1;TGFBI;KLF4;HMOX1;CXCR4			CSF1R;ETS1;CYBB;TNFAIP3;TGFBI;BTG1;SYK;KLF2;CXCR4;ADGRG1;TNFAIP2;ANXA1;PRKCB;FLNA;KLF4;BCL2	CSF1R;KIT;ETS1;CYBB;ADGRG1;PRKCB;FLNA;SYK;KLF2;TGFBI;KLF4;BCL2		COL4A2;ADGRG1;RHOJ;GJA1;KLF4;ADAMTS9;SPARC;ACVRL1;COL3A1;CD34;ANXA2;ANGPT2;VASH1;HDAC7;COL8A1;APOLD1;TIE1;SOX17;PTGIS;SPRY1;COL4A1;BMP4;ADAM15;DLL1;SMAD6;ANXA1	TAL1;ACVRL1;ADAM15;MMRN2;MEF2C;TGFBR3;ACKR3;COL8A1;EFNB2;ANXA2;DLC1;RASIP1;DLL1;ADGRF5;BMP4;EGFL7;KLF4;GJA5;ELK3;LUZP1;CLEC14A;KDR;EPHB4;ADAMTS9;STAB2;SMAD6;CDH13;NPR1;CALCRL;STAB1;PRCP;SKI;ADGRG1;RAMP2;TIE1;PTPRM;SPARC;CAV1;APOLD1;SEMA6A;EDNRB;KLF2;CLDN5;PTGIS;MAPK7;TEK;COL3A1;HDAC7;CD34	CALCRL;ECM1;PLXND1;APOLD1;PTGIS;RASIP1;HEG1;CLDN5;ADAM15;SMAD6;ANXA2;CLEC14A;ADGRG1;ACVRL1;CEMIP2;MEF2C;STAB1;MAPK7;SPARC;COL3A1;CDH13;SEMA6A;ROBO4;DLL1;PTPRM;PRCP;AQP1;WWTR1;FLT4;ITGA5;RAMP2;EGFL7;ENG;TGFBR3;SERPINE1;NOS3;FLT1;MCAM;ADGRF5;ADAMTS1;KDR;TAL1;EPHB4;SOX17;KLF2;TIE1;PTPRB;CDH5;STAB2;MMRN2;KLF4
GOBP_EMBRYONIC_PATTERN_SPECIFICATION
GOBP_VASCULAR_PROCESS_IN_CIRCULATORY_SYSTEM				1.35	1.608									2.57	1.558				4	5									11	8				ACTA2;MMP2;EDNRB;PRKG1	EDNRB;MMP2;ACTA2;SOD3;PRKG1									EDNRB;AKAP12;KLF2;NPR1;CLDN5;GJA5;RAMP2;SLC7A8;TEK;SLC7A1;CAV1	AKAP12;RAMP2;PLVAP;KLF2;SLC7A8;CDH5;NOS3;CLDN5
GOBP_REGULATION_OF_IMMUNOGLOBULIN_PRODUCTION											1.64															3															PTPRC;FCGR3;SASH3
GOBP_NEURON_DIFFERENTIATION				1.725	1.543					1.383	1.387	1.421		1.69	1.45				12	13					16	14	13		27	24				MMP2;FLNA;KLF4;ITM2C;NOTCH3;SEMA5A;THY1;ENAH;LAMB1;VIM;PRKG1;EDNRB	EDNRB;VIM;SFRP1;KLF4;LAMB1;SEMA5A;FLNA;NOTCH3;MMP2;THY1;ENAH;ITM2C;PRKG1					KLF4;CSF1R;BTG2;RAC2;CCDC88A;LST1;LYN;SGK1;CXCR4;VIM;CYFIP2;FLNA;FYN;SEMA4D;BCL2;MBP	CSF1R;CCDC88A;CYFIP2;FLNA;VIM;KLF4;SEMA4D;FYN;PRKCQ;GPRIN3;MBP;S100A9;TOX;BCL2	RAC2;PRKCQ;CCDC88A;S100A9;CYFIP2;VIM;CSF1R;KLF4;SGK1;MBP;LST1;TOX;SEMA4D		UGCG;TAL1;ITGA6;MEF2C;PREX2;EFNB2;TIAM1;VCAM1;KLF7;GPM6A;DLL1;DPYSL3;BMP4;RELN;KLF4;EPHB4;APP;CSNK1E;DAB2;PTPRM;PCDH12;VIM;HECW2;SEMA6A;EDNRB;LAMB2;NRN1	KLF7;PLXND1;HERC1;ITGA6;RELN;MEF2C;SEMA6A;ROBO4;DLL1;PTPRM;CSNK1E;DPYSL3;TCF4;SGK1;PCDH12;VCAM1;DAB2;TAL1;EPHB4;SEMA3F;VIM;SHANK3;PREX2;KLF4
GOBP_REGULATION_OF_NEUTROPHIL_ACTIVATION								5.697	4.427	1.856	1.973	2.124											5	4	2	2	2											PTAFR;FCGR3;SPI1;SYK;ITGB2	FCGR3;ITGB2;SYK;SPI1	ITGB2;SYK	SYK;FCGR3	SYK;ITGB2
GOBP_REGULATION_OF_CELL_PROLIFERATION_INVOLVED_IN_KIDNEY_DEVELOPMENT													1.855	1.318														2	2														BMP4;PDGFB	PDGFB;BMP4
GOBP_REGULATION_OF_ACTIN_FILAMENT_BASED_PROCESS				1.386	2		1.872	3.303	3.209	3.433	2.795	3.818		1.637					5	7		7	12	11	11	9	10		11					FLNA;ACTA2;SEMA5A;CDC42EP3;TPM1	SFRP1;SEMA5A;FLNA;CDC42EP3;TPM1;ACTA2;RGS4		PLEK;ARPC1B;COTL1;TMSB10;HCLS1;NCKAP1L;CDC42EP3	NCKAP1L;ARPC1B;CCDC88A;CSF1R;WAS;TMSB10;PYCARD;HCK;PLEK;COTL1;WASF2;CDC42EP3	WAS;COTL1;CCDC88A;CSF1R;HCLS1;ARHGEF10L;PYCARD;NCKAP1L;TMSB10;ARPC1B;HCK	ARHGDIB;CSF1R;CORO1A;COTL1;RAC2;CCDC88A;HCLS1;CYFIP2;PLEK;FLNA;EVL	EVL;CSF1R;CCDC88A;CYFIP2;CORO1A;COTL1;FLNA;PLEK;ARHGDIB	HCK;RAC2;CCDC88A;ARHGDIB;CYFIP2;COTL1;CSF1R;CORO1A;EVL;HCLS1		ADD3;FSCN1;ESAM;CDC42EP3;GJA5;TMSB10;TEK;TMOD3;DLC1;DSTN;CAV1
GOBP_G_PROTEIN_COUPLED_PURINERGIC_NUCLEOTIDE_RECEPTOR_SIGNALING_PATHWAY								1.807															2															PTAFR;P2RY13
GOBP_SYNCYTIUM_FORMATION
GOBP_MUSCLE_CELL_PROLIFERATION				3.771	3.172	3.035	1.819		1.406					2.22	3.047				7	7	6	5		5					9	10				MMP2;IGFBP5;NOTCH3;THBS1;TPM1;ADAMTS1;PRKG1	TBX2;IGFBP3;NOTCH3;MMP2;TPM1;IGFBP5;PRKG1	IGFBP5;NOTCH3;ADAMTS1;TBX2;IGFBP3;TPM1	THBS1;PTAFR;GNAI2;HMOX1;CYBA		JARID2;AIF1;CYBA;IL6RA;GNAI2					CDH13;CALCRL;NPR1;BMP4;MEF2C;TGFBR3;TLR4;PDGFB;IGFBP3	MEF2C;GNAI2;CDH13;PDGFB;CALCRL;TGFBR3;TLR4;NOS3;IGFBP3;ADAMTS1
GOBP_STRESS_ACTIVATED_PROTEIN_KINASE_SIGNALING_CASCADE										1.327															5															NFKB1;NCF1;LYN;GADD45B;PTPN22
GOBP_CARBOHYDRATE_PHOSPHORYLATION									1.478															2															NAGK;HK3
GOBP_BONE_TRABECULA_MORPHOGENESIS				2.159	3.311														2	3														COL1A1;MMP2	MMP2;COL1A1;SFRP1
GOBP_IMMUNOGLOBULIN_PRODUCTION											1.786															4															SAMHD1;PTPRC;FCGR3;SASH3
GOBP_REGULATION_OF_CELLULAR_RESPONSE_TO_VASCULAR_ENDOTHELIAL_GROWTH_FACTOR_STIMULUS				1.765	1.635	1.839									1.877				2	2	2									3				CCBE1;CD63	CD63;CCBE1	CD63;CCBE1									MYO1C;SEMA6A;DLL1
GOBP_ANATOMICAL_STRUCTURE_ARRANGEMENT															1.331															2															SEMA3F;DLL1
GOBP_NEGATIVE_REGULATION_OF_CELL_GROWTH					2.04								1.374		1.351					5								4		6					SFRP1;SEMA5A;FHL1;CRYAB;RGS4								ACVRL1;ADAM15;SOX17;GJA1		DAB2;SEMA6A;SOX17;SEMA3F;ADAM15;ACVRL1
GOBP_NEGATIVE_REGULATION_OF_MAST_CELL_DEGRANULATION							2.524															2															CD84;HMOX1
GOBP_CELLULAR_RESPONSE_TO_STRESS										1.446															20															NFKB1;CYBB;SGK1;PTPN22;AIF1;BCL2;CD44;BTG2;TNFAIP3;KLF2;ANXA1;GADD45B;FLNA;SESN1;ATM;NCF1;LYN;FYN;IER5;KLF4
GOBP_POSITIVE_REGULATION_OF_PHOSPHATIDYLINOSITOL_3_KINASE_SIGNALING										2.153		2.598		1.866	2.019										4		4		5	5										HCLS1;NCF1;FGR;SEMA4D		FGR;HCLS1;KIT;SEMA4D		SELP;RELN;TEK;KDR;PDGFB	PDGFB;SELP;FLT1;RELN;KDR
GOBP_DEFENSE_RESPONSE_TO_GRAM_POSITIVE_BACTERIUM									1.398	1.487		1.816												3	3		3												PYCARD;TLR2;FGR	FGR;TLR2;KLRK1		KLRK1;TLR2;FGR
GOBP_RESPONSE_TO_FATTY_ACID	1.539		1.591				1.872	1.454	1.612							3		3				3	3	3							HMGCS2;ACSL1;CAT		HMGCS2;ACSL1;CAT				TLR2;TBXAS1;PTAFR	PTAFR;TBXAS1;UCP2	TBXAS1;TLR2;UCP2
GOBP_HEART_DEVELOPMENT				1.63	2.51	2.204							4.345	7.773	6.805				7	10	8							14	28	25				MMP2;FBN1;FLNA;TPM1;ADAMTS1;COL3A1;COL5A1	MYH11;TBX2;FLNA;MMP2;FBN1;TPM1;COL3A1;RGS4;CPE;COL5A1	FBN1;RGS4;ENG;COL5A1;ADAMTS1;TBX2;MYH11;TPM1							SPRY1;ADGRG6;BMP4;GJA1;ADAM15;ACVRL1;DLL1;PDGFB;ADAMTS9;SMAD6;COL3A1;FKBP1A;TIE1;SOX17	ACVRL1;ADAM15;EPOR;MEF2C;TGFBR3;EFNB2;VCAM1;DLC1;PDGFB;DLL1;BMP4;CCM2L;ADGRG6;GJA5;LUZP1;CPE;RPS6KA2;KDR;EPHB4;ADAMTS9;SMAD6;CALCRL;RAMP2;TIE1;KDM6B;CLDN5;TEK;COL3A1	CALCRL;PLXND1;HEG1;ADAM15;CLDN5;SMAD6;EPOR;ACVRL1;MEF2C;PDGFB;DLL1;RAMP2;CCM2L;ENG;RPS6KA2;TGFBR3;NOS3;VCAM1;ADAMTS1;KDR;EPHB4;SOX17;KDM6B;TIE1;COL3A1
GOBP_DENDRITE_EXTENSION										1.316															2															CXCR4;CYFIP2
GOBP_B_CELL_RECEPTOR_SIGNALING_PATHWAY							2.498	4.755	4.047	5.208	8.244	4.843										4	7	6	7	9	6										KLHL6;PRKCB;NFAM1;NCKAP1L	NCKAP1L;NFAM1;KLHL6;FCGR3;IFI205;SYK;PRKCB	FCGR3;NFAM1;PRKCB;KLHL6;NCKAP1L;SYK	PTPRC;PRKCH;SYK;LYN;PRKCB;PTPN22;BCL2	PRKCB;LCK;SYK;IFI205;FCGR3;PTPN22;PTPRC;PRKCH;BCL2	PTPN22;SYK;PRKCH;PTPRC;LCK;PRKCB
GOBP_EXOCYTOSIS							3.588	4.805	4.069	3.654	2.427	4.012										10	14	12	11	8	10										PLEK;PRKCB;PTAFR;ANXA1;GNAI2;CD84;TNFAIP2;NCKAP1L;RAB31;HMOX1	ANXA1;PTAFR;NCKAP1L;FCGR3;RAB31;GNAI2;LRRK2;SPI1;HCK;SYK;PLEK;CD84;ITGB2;PRKCB	RAB31;FCGR3;PRKCB;FGR;SPI1;NCKAP1L;LRRK2;SYK;HCK;ITGB2;CD84;GNAI2	CORO1A;RAC2;SYK;ITGB2;RAB31;FGR;ANXA1;TNFAIP2;PLEK;PRKCB;LYN	KIT;RASGRP1;PRKCB;CORO1A;SYK;RAB31;PLEK;FCGR3	HCK;RAC2;FGR;SYK;RASGRP1;KIT;CORO1A;ITGB2;PRKCB;RAB31
GOBP_AXON_DEVELOPMENT				1.924	1.609					1.438	1.788								7	7					8	8								MMP2;FLNA;KLF4;NOTCH3;SEMA5A;THY1;ENAH	KLF4;SEMA5A;FLNA;NOTCH3;MMP2;THY1;ENAH					CSF1R;RAC2;FYN;FLNA;KLF4;SEMA4D;BCL2;MBP	CSF1R;FLNA;SEMA4D;KLF4;FYN;PRKCQ;MBP;BCL2
GOBP_NEGATIVE_REGULATION_OF_EPITHELIAL_CELL_MIGRATION													2.94	2.305	1.874													5	6	5													ANGPT2;VASH1;KLF4;ADAMTS9;ACVRL1	ACVRL1;MMRN2;MEF2C;KLF4;PTPRM;ADAMTS9	MEF2C;PTPRM;ACVRL1;MMRN2;KLF4
GOBP_POSITIVE_REGULATION_OF_CARDIOCYTE_DIFFERENTIATION														1.984															3															MEF2C;EFNB2;BMP4
GOBP_CELLULAR_RESPONSE_TO_FLUID_SHEAR_STRESS				1.912	1.771					1.696	1.822	1.961		2.983	3.173				2	2					2	2	2		4	4				MMP2;KLF4	MMP2;KLF4					KLF2;KLF4	KLF2;KLF4	KLF4;KLF2		MEF2C;MAPK7;KLF2;KLF4	MEF2C;MAPK7;KLF2;KLF4
GOBP_NEGATIVE_REGULATION_OF_CELL_ACTIVATION							5.217	7.287	7.032	5.607	3.724	4.953										10	14	13	11	8	9										FGL2;LST1;LAPTM5;ANXA1;CD84;HMOX1;AXL;TYROBP;NCKAP1L;VSIR	ANXA1;VSIR;LAPTM5;NCKAP1L;FCGR3;FGL2;IFI205;SPI1;TYROBP;MERTK;VSIG4;CD84;AXL;CD86	FCGR3;FGR;TYROBP;AXL;NCKAP1L;FGL2;LST1;LAPTM5;MERTK;VSIG4;VSIR;CD84;SPI1	PTPRC;TYROBP;TNFAIP3;LAPTM5;ATM;FGL2;FGR;LYN;ANXA1;PTPN22;LST1	IFI205;FCGR3;FGL2;PTPN22;PTPRC;ATM;LAPTM5;TYROBP	FGR;PTPN22;ATM;TNFAIP3;FGL2;TYROBP;LAPTM5;PTPRC;LST1
GOBP_CELLULAR_RESPONSE_TO_GROWTH_HORMONE_STIMULUS	1.509		1.517							1.664						2		2							2						GHR;STAT3		STAT3;GHR							LEPROTL1;LYN
GOBP_T_CELL_MEDIATED_IMMUNITY								2.268	1.792		1.428												5	4		3												NCKAP1L;STX7;FCGR3;WAS;CTSH	FCGR3;NCKAP1L;CD55;WAS		PTPRC;FCGR3;SASH3
GOBP_SKIN_DEVELOPMENT				2.598	2.789	2.056													6	7	5													COL1A1;COL1A2;IGFBP5;COL5A1;COL3A1;ADAMTS2	KAZN;COL1A1;COL1A2;ADAMTS2;COL3A1;IGFBP5;COL5A1	IGFBP5;COL1A2;COL5A1;ADAMTS2;COL1A1
GOBP_RETINA_VASCULATURE_MORPHOGENESIS_IN_CAMERA_TYPE_EYE													2.088															2															RHOJ;COL4A1
GOBP_POSITIVE_REGULATION_OF_RESPONSE_TO_WOUNDING							1.773			1.592												3			3												CXCR4;ANXA1;THBS1			FLNA;ANXA1;CXCR4
GOBP_REGULATION_OF_JUN_KINASE_ACTIVITY
GOBP_RESPONSE_TO_PEPTIDE				1.925	1.609		3.281	2.962	3.465	5.559	2.692	3.072	2.207	1.674	2.672				7	7		11	13	13	16	10	10	9	13	15				COL1A1;MMP2;FBN1;IGFBP5;VIM;COL3A1;EDNRB	EDNRB;COL1A1;VIM;MMP2;FBN1;COL3A1;IGFBP5		PRKCB;NAMPT;CYBB;PKM;ANXA1;TLR2;GNAI2;VCAM1;CYBA;RAB31;VIM	ANXA1;VIM;LGMN;PKM;FCGR3;RAB31;GNAI2;CYBB;UCP2;CYBA;NAMPT;VCAM1;PRKCB	RAB31;FCGR3;VCAM1;CYBB;VIM;PRKCB;NAMPT;TLR2;LGMN;UCP2;PKM;CYBA;GNAI2	PTPN22;BTG2;TLR2;NFKB1;CYBB;TNFAIP3;BTG1;PIP4K2A;KLF2;RAB31;LEPROTL1;LYN;ANXA1;PRKCB;FYN;VIM	CYBB;PRKCB;RAB31;KLF2;FCGR3;VIM;FYN;PRKCQ;PTPN22;PIP4K2A	PTPN22;PRKCQ;TNFAIP3;VIM;PIP4K2A;CYBB;TLR2;PRKCB;RAB31;KLF2	NAMPT;VIM;SOGA1;GJA1;GRB10;ICAM1;ANXA1;COL3A1;APP	EDNRB;KLF2;NAMPT;TGFBR3;COL3A1;TLR4;CAV2;VCAM1;GRB10;VIM;FCGR3;CAV1;APP	NAMPT;GNAI2;SOGA1;LGMN;KLF2;TGFBR3;TLR4;VIM;CAV2;FCGR3;ICAM1;MYO1C;PXN;COL3A1;VCAM1
GOBP_DENDRITIC_SPINE_MAINTENANCE											1.822															2															FCGR3;FYN
GOBP_GAMMA_DELTA_T_CELL_ACTIVATION								1.585	1.708	2.92	3.088	3.311											2	2	3	3	3											SYK;NCKAP1L	NCKAP1L;SYK	TCF7;SYK;PTPRC	SYK;TCF7;PTPRC	TCF7;SYK;PTPRC
GOBP_NEGATIVE_REGULATION_OF_MULTICELLULAR_ORGANISM_GROWTH															1.572															2															LGMN;PLAC8
GOBP_GLOMERULAR_MESANGIAL_CELL_PROLIFERATION													1.987	1.455														2	2														BMP4;PDGFB	PDGFB;BMP4
GOBP_DEPHOSPHORYLATION											2.132															8															INPP4B;PTPN4;LCK;PLEK;SEMA4D;PTPN22;PTPRC;BCL2
GOBP_POSITIVE_REGULATION_OF_INTRINSIC_APOPTOTIC_SIGNALING_PATHWAY											1.914	2.089														3	3														LCK;S100A8;S100A9	S100A9;S100A8;LCK
GOBP_LOCOMOTION				7.33	5.949	5.768	3.348	7.948	7.11	6.939	6.227	9.799	7.958	9.059	13.761				26	27	22	23	42	37	35	30	34	32	55	60				GPC6;NOTCH3;THY1;ENAH;ADAMTS1;COL5A1;FLNA;SPARC;ACTA2;THBS1;TPM1;COL3A1;EDNRB;FBLN1;COL1A1;MMP2;LAMC1;KLF4;IGFBP5;SEMA5A;CAVIN1;LAMB1;PRKG1;CCBE1;FSTL1;CD63	EDNRB;SFRP1;CD63;FLNA;PRKG1;CAVIN1;NOTCH3;MMP2;THY1;COL3A1;IGFBP5;FSTL1;COL1A1;SPARC;TPM1;ACTA2;COL5A1;ITGA9;LAMC1;LAMB1;FBLN1;KLF4;SEMA5A;IGFBP3;CCBE1;ENAH;GPC6	LAMC1;ENG;CD63;FBLN1;SERPINE1;IGFBP3;LAMB1;CCBE1;KLF4;IGFBP5;SPARC;THY1;AGTR1A;GPC6;ITGA1;TPM1;MCAM;NOTCH3;COL5A1;ADAMTS1;ITGA9;COL1A1	SGK1;PLP2;SELL;CTSH;ANXA1;GLIPR2;VCAM1;MPP1;PTAFR;PLEKHO1;GNAI2;THBS1;HMOX1;AXL;RAP2B;NCKAP1L;KLF4;PREX1;VSTM4;TMSB10;S100A11;CXCR4;VSIR	PTAFR;S100A11;VSIR;KLF4;SDC3;CSF1R;PYCARD;SPI1;CD44;MERTK;VSTM4;PLEKHO1;ARRB2;MEGF9;FCER1G;AIF1;LRRK2;AXL;CTSH;SRGAP2;ANXA1;FOLR2;PLP2;NCKAP1L;GLIPR2;GNAI2;HCK;S100A9;VCAM1;S100A8;RAP2B;LGMN;DAB2;CCDC88A;TMSB10;WAS;PREX1;SYK;ZEB2;ITGB2;MPP1;WASF2	WAS;VCAM1;S100A9;CCDC88A;SDC3;VSTM4;AXL;DAB2;ARRB2;NCKAP1L;SELL;HCK;ZEB2;GNAI2;AIF1;PYCARD;LRRK2;SYK;S100A11;TMSB10;FPR1;S100A8;RAP2B;LGMN;FCER1G;SGK1;FOLR2;IL6RA;ITGB2;SRGAP2;FGR;CSF1R;PREX1;MERTK;VSIR;KLF4;SPI1	ITGAL;ETS1;FGR;SGK1;CXCR4;AIF1;BCL2;EVL;CD44;CSF1R;TNFAIP3;RAC2;BTG1;STK10;ANXA1;FLNA;ARHGDIB;CORO1A;SYK;CCDC88A;ATM;KLRK1;LYN;CCR5;FYN;SEMA4D;RPS19;FCER1G;PTPRC;PBXIP1;SH3KBP1;ITGB2;ADGRG1;S100A11;KLF4	EVL;KIT;ETS1;ADGRG1;SYK;LCK;FCER1G;ZEB2;S100A8;CCR5;AIF1;CCDC88A;CORO1A;PRKCQ;KLRK1;SH3KBP1;FLNA;PBXIP1;KLF4;SEMA4D;ARHGDIB;FYN;S100A11;PTPRC;S100A9;BCL2;CSF1R;STK10;ATM;CD44	PRKCQ;CCDC88A;S100A9;PBXIP1;ARHGDIB;SYK;CSF1R;SH3KBP1;LCK;STK10;ADGRG1;AIF1;FPR1;RAC2;BIN2;ITGB2;CORO1A;KLF4;SGK1;KLRK1;FCER1G;HCK;FGR;KIT;EVL;CCR5;ZEB2;SEMA4D;ATM;ITGAL;TNFAIP3;PTPRC;S100A8;S100A11	ADGRG1;RHOJ;CAVIN1;GJA1;KLF4;TIAM1;ADAMTS9;SPARC;ICAM1;ACVRL1;COL3A1;CD34;APP;ITGA6;GRB10;LIMCH1;NAV1;ANGPT2;VASH1;GPM6A;TMSB10;HDAC7;NEDD9;TIE1;SOX17;SGK1;BMP4;ADAM15;DPYSL3;LAMB2;ANXA1;PDGFB	ACVRL1;ITGA6;ADAM15;MMRN2;MEF2C;TGFBR3;ACKR3;EFNB2;TIAM1;VCAM1;KLF7;DLC1;PDGFB;DSTN;GPM6A;AKAP12;DPYSL3;BMP4;RIPOR1;RELN;KLF4;CLEC14A;LDB2;ITGA9;EPHB4;ADAMTS9;KDR;APP;CDH13;SELP;NAV1;FSCN1;PRCP;SKI;ADGRG1;PECAM1;TIE1;PTPRM;DAB2;ZEB2;GRB10;TMSB10;SPARC;CAVIN1;CAV1;IGFBP3;SEMA6A;EDNRB;CLDN5;LAMB2;TLR4;TEK;COL3A1;HDAC7;CD34	TMSB10;KLF7;PLVAP;ECM1;PXN;PLXND1;IGFBP3;CLDN5;ADGRG1;ADAM15;ACVRL1;RELN;ITGA6;CLEC14A;MYO1C;RIPOR1;MEF2C;SPARC;COL3A1;CDH13;SEMA6A;PDGFB;SELP;ROBO4;PTPRM;PRCP;FLT4;ITGA5;DPYSL3;LGMN;ENG;TGFBR3;SERPINE1;NOS3;FLT1;MCAM;SGK1;ICAM1;MMRN2;VCAM1;ADAMTS1;KDR;AKAP12;DAB2;FSCN1;GNAI2;ITGA9;SOX17;EPHB4;PECAM1;ZEB2;TIE1;TLR4;SEMA3F;CDH5;LIMCH1;NEDD9;JAM2;KLF4;PEAK1
GOBP_REGULATION_OF_VASCULATURE_DEVELOPMENT				3.542	1.393	2.953	2.711			2.301		1.392	5.413	5.775	12.367				8	5	7	8			8		5	12	18	25				COL4A2;THBS2;CCBE1;SPARC;KLF4;THBS1;SEMA5A;ADAMTS1	SFRP1;KLF4;SEMA5A;SPARC;CCBE1	SPARC;ENG;THBS2;SERPINE1;ADAMTS1;CCBE1;KLF4	PRKCB;CTSH;CYBB;PKM;THBS1;CXCR4;KLF4;HMOX1			ETS1;CYBB;TNFAIP3;BTG1;KLF2;CXCR4;PRKCB;KLF4		TNFAIP3;KLF4;CYBB;PRKCB;KLF2	PTGIS;ANGPT2;COL4A2;VASH1;RHOJ;KLF4;DLL1;ADAMTS9;SPARC;ACVRL1;CD34;TIE1	ACVRL1;KLF2;NPR1;CLDN5;KDR;PTGIS;STAB1;MAPK7;KLF4;RAMP2;TIE1;PTPRM;TEK;SPARC;ADAMTS9;CD34;DLL1;SEMA6A	ECM1;PLXND1;PTGIS;CLDN5;ACVRL1;CEMIP2;STAB1;MAPK7;SPARC;SEMA6A;DLL1;PTPRM;AQP1;ITGA5;RAMP2;ENG;SERPINE1;NOS3;FLT1;KDR;ADAMTS1;KLF2;TIE1;CDH5;KLF4
GOBP_CELLULAR_RESPONSE_TO_TESTOSTERONE_STIMULUS	1.835															2															SRD5A1;AR
GOBP_REGULATION_OF_CELLULAR_MACROMOLECULE_BIOSYNTHETIC_PROCESS
GOBP_VASCULAR_ASSOCIATED_SMOOTH_MUSCLE_CELL_PROLIFERATION				4.063	2.6	2.045									1.625				5	4	3									4				MMP2;IGFBP5;TPM1;ADAMTS1;PRKG1	MMP2;PRKG1;IGFBP5;TPM1	IGFBP5;TPM1;ADAMTS1									MEF2C;PDGFB;GNAI2;ADAMTS1
GOBP_CELLULAR_RESPONSE_TO_RADIATION					1.498															4															MFAP4;CRYAB;SFRP1;MMP2
GOBP_GLOMERULUS_MORPHOGENESIS														1.622															2															MEF2C;BMP4
GOBP_SARCOMERE_ORGANIZATION				1.441		1.51													2		2													TPM1;CSRP1		TPM1;CSRP1
GOBP_CELLULAR_TRANSITION_METAL_ION_HOMEOSTASIS							1.395	2.17	2.416		1.377	2.246										3	5	5		3	4										SLC40A1;SLC31A2;HMOX1	SLC40A1;SLC31A2;S100A9;SLC11A1;S100A8	SLC11A1;S100A8;SLC31A2;S100A9;SLC40A1		LCK;S100A8;S100A9	S100A9;SLC11A1;S100A8;LCK
GOBP_EPIDERMIS_DEVELOPMENT													1.318															5															BMP4;EMP1;KLF4;DLL1;ANXA1
GOBP_POSITIVE_REGULATION_OF_MUSCLE_TISSUE_DEVELOPMENT													1.597															2															GJA1;DLL1
GOBP_REGULATION_OF_PHOSPHATASE_ACTIVITY							2.31			1.422	1.583											4			3	3											PLEK;NCKAP1L;GNAI2;FKBP1A			PLEK;SEMA4D;PTPRC	PLEK;PTPRC;SEMA4D
[truncated: 623 more rows]

## Sheet: SuppTable9c_ORA_female
Supplemental Table 9c: Over Representation Analysis (ORA) using FEMALE liver cell-type core genes (Supplemental Figure 6d)
[truncated: 1,910 more rows]
