# Supplementary material for: Plasticity of Epigenomic and Transcriptomic Aging Reveals Common Targets for Reprogramming by Environmental Exposures
Source: Research Square preprint supplement (doi:10.21203/rs.3.rs-7368222/v1), 2025-09-19
Supplement: Supplementary file 11 [file d013bd6e78fa390a5ad07501.xlsx]

## Sheet: SuppTable10A_DEGs
Supplemental Table 10A: Differentially Expressed Genes (DEGs) in comparisons of risk samples or LAAsP (Figure 7)
Cutoffs for DEGs are linear fold change exceeding 1.5 and adjusted p-value (FDR) < 0.05
Values are log2 fold change
HR = High risk Endotype 1, LR = Low risk Endotype 2
Gene	M_liver_5mo_TBT.over.VEH	M_liver_5mo_HR.over.VEH	M_liver_5mo_LR.over.VEH	M_liver_5mo_HR.over.LR	M liver LAAsP (3wk to 5mo)
Cyp2b9	4.27389	5.88907	4.03546	1.73433	-7.52804
Cyp3a16	2.13675	4.99483	0	3.87957	-7.88559
Cdh17	5.42854	4.63123	0	-1.20214	0
Slc22a27	2.32404	4.46925	1.32416	3.09555	-6.45514
Hao2	4.15636	4.13205	4.29136	0	-9.6936
Fmo3	3.48466	4.0996	3.10273	0.975648	-9.75543
Gm3776	0	4.09658	0	4.80936	0
Tcf24	2.05211	4.03946	0	2.81508	-4.9937
Gm10801	1.13365	3.99643	1.36883	2.61413	0
Aqp7	2.07767	3.83608	0	2.24915	0
Cyp3a44	1.49729	3.81575	0	2.69326	-7.76339
Vmn2r3	0	3.77414	0	6.49693	0
Neil3	2.31436	3.71059	0	2.10412	-4.40698
Vil1	3.26203	3.66915	3.00947	1.2797	0
Ubd	0	3.65299	0	4.30936	0.739392
Cyp2a4	1.59892	3.60248	0	4.39655	-3.5571
Gm10800	0	3.53701	1.15353	2.33209	0
Slc7a11	0	3.52628	-2.40793	5.98372	0
Gm10717	0.636153	3.52571	0	2.72158	0
Hist1h3g	1.61425	3.52443	0	2.8002	0
Aplnr	0	3.51861	0	4.01835	0
Fbn2	0	3.41955	0	5.03125	0
Tmem45b	3.0131	3.41852	2.91556	0	0
Stc1	0	3.41714	0	3.0427	0
Cfap44	0	3.4067	0	3.40869	0
Slc1a1	1.86303	3.37891	0	1.80923	0
Adra2a	0	3.37111	0	3.10956	0
Gm21738	0	3.35027	1.00872	2.23707	0
Krt20	4.48102	3.34091	0	0	0
Depdc1b	0	3.24091	0	3.00112	-3.76977
Hist1h2bl	0	3.23477	0	3.08336	0
Akr1c18	2.87827	3.21962	2.73296	0.771864	-7.1805
Pbk	0	3.21651	0	3.59938	-3.94114
Hist1h2ai	0	3.20038	0	2.79174	0
Prr11	1.59273	3.19466	0	2.76687	-3.71354
Slc22a29	1.22793	3.18224	0	2.5714	-4.99809
Hist1h2bn	1.32077	3.17035	0	2.49027	0
Depdc1a	0	3.16885	0	3.53043	-4.25958
Mki67	1.02783	3.16455	0	3.11945	-3.78294
Slc4a9	0	3.14571	0	1.9117	0
Insyn1	0	3.13959	0	3.96214	0
Lars2	1.42856	3.13565	0	2.38353	-1.57702
Npc1l1	2.36485	3.11754	0	0	0
Gm10722	0	3.08287	0	2.36461	0
Ffar4	0	3.08079	0	1.99563	0
Hist1h2ak	1.51505	3.07498	0	1.99444	0
Elovl7	1.04342	3.0724	0	3.3409	-1.5952
Tceal5	0	3.06599	0	3.88072	0
Fcgbp	5.10297	3.06085	6.15712	-3.00268	0
Cacna1b	0	3.04726	0	3.66227	0
Col1a1	0.804549	3.03431	0	3.11315	-2.98915
Gsta1	1.08193	3.01388	0	3.26908	0
Iqgap3	1.00881	3.00218	0	3.62153	-3.74232
Eln	0.885828	2.98484	0	3.11828	-4.58221
Styk1	1.64697	2.98046	0	2.01224	0
Polq	0	2.97367	0	2.77136	0
Foxm1	1.08011	2.96997	0	3.16517	-3.6973
Cdh6	0	2.9689	0	3.68962	0
Diaph3	0	2.96532	0	3.29005	-3.63496
Uhrf1	1.21796	2.94062	0	2.51776	-3.69597
Hist1h1b	0.93508	2.917	0	2.56796	0
Cyp2a22	1.43123	2.91436	1.03352	1.72247	-6.7658
Abcb1a	1.13825	2.90799	0	2.61024	-1.77255
Wfdc3	0	2.90286	0	3.31487	0
Cyp2c55	1.10425	2.90248	0	2.42489	-2.44795
Ppp2r2b	0	2.89878	0	3.3959	0
Ccnb2	0.976082	2.88376	0	3.15913	-4.12455
Sdcbp2	1.55725	2.87096	0	2.89085	0
Cbr3	0	2.86861	0	3.60311	0
Cdca2	1.06491	2.86431	0	3.07718	-3.61614
Shcbp1	0	2.86223	0	2.83778	-3.62462
Mfap4	0	2.85122	0	3.10368	-1.94762
Tpx2	0.886284	2.84929	0	3.27801	-3.91398
Cdkn3	0	2.84522	0	3.21779	-4.0347
Parpbp	0	2.83503	0	3.38196	-3.91225
Bex1	0	2.82768	0	2.95192	0
Ncapg	1.12033	2.82176	0	3.01899	-3.64245
Lpl	1.15546	2.82053	0.770311	2.00062	-4.20855
Syt14	0	2.81185	0	2.34146	0
Ttk	0	2.8113	0	3.32505	-3.80721
Spink1	2.39006	2.80716	1.86203	0	-2.81531
Gipc2	1.39643	2.80175	0	2.66201	0
Hist1h2bm	1.21975	2.79921	0	1.97559	0
Abcc12	0	2.79018	0	3.47965	0
Ppp1r3g	1.46348	2.78826	0	2.13417	0
Arnt2	0	2.7842	0	2.06533	0
Hmmr	0	2.78141	0	3.51679	-3.99042
Osbpl3	0.948943	2.76235	0	2.73004	2.60804
Sprr1a	0	2.76202	0	4.39547	0
Knl1	0	2.75055	0	2.97246	-3.63273
Ccna2	0	2.74603	0	3.03324	-4.02982
Ccr3	0	2.7392	0	3.62068	0
Scube1	0	2.7389	-1.26991	3.94057	0
Ckap2l	0	2.73844	0	3.57761	-3.94581
Cenpf	0	2.73507	0	3.57846	-3.77563
Tmprss4	1.65864	2.73271	0	1.79422	0
Hist1h2bj	1.43741	2.73246	0	1.92471	0
Rad51ap1	0	2.72392	0	2.6151	-3.79178
Dlgap5	0	2.71522	0	3.45727	-3.96265
Top2a	0.933963	2.70534	0	2.72597	-3.80045
Aurkb	0	2.69509	0	2.66293	-4.11036
Gpx2	1.4074	2.69476	0	2.47113	0
Gstm3	0	2.69184	-0.725237	3.40265	-0.605307
Tubb2b	0	2.68645	0	3.11786	0
Hist1h3h	0	2.68413	0	2.17205	0
Fat3	0	2.67702	0	2.85772	0
Cyp2b10	0	2.67426	0	3.16222	-0.728205
Dpysl4	0	2.67148	0	2.77039	0
F2rl1	0	2.66922	0	2.12856	0
Vtcn1	0	2.66813	0	2.81992	0
Cenpe	0	2.65501	0	3.21907	-3.53359
Kif18b	0	2.64946	0	3.08009	-3.74229
Nuf2	0	2.64858	0	2.94407	-4.13849
Kntc1	0	2.64664	0	2.8602	-4.03044
Oip5	0	2.64479	0	2.53693	-3.47189
Prc1	0	2.64021	0	3.26475	-3.78902
Birc5	1.09284	2.63679	0	2.43833	-3.59169
Hist1h2bk	0	2.63509	0	1.52993	0
Rasal1	0	2.63372	-2.20188	4.69133	0
Ccl22	0	2.63151	0	2.86548	0
Hkdc1	1.8882	2.62758	0	1.72215	0
Slit2	0	2.62605	0	3.11676	0
Gm10718	0	2.6213	0	2.27166	0
Hist1h2ab	1.5659	2.62096	0	1.40644	0
Cdk1	0	2.61132	0	3.20252	-2.95813
Racgap1	0	2.61124	0	3.1787	-3.97615
Ndc80	0	2.61072	0	2.94523	-3.5078
Stil	0	2.60931	0	2.81614	-3.10459
Mogat2	2.49641	2.60418	2.50213	0	0
Cdc6	0	2.59575	0	2.22812	0
Mcmdc2	0	2.59356	0	0	0
Plk1	0	2.5877	0	3.33435	-3.78022
Rbm24	0	2.58758	0	3.78901	0
Cdca5	0	2.58449	0	2.76268	-3.69605
Scube3	0	2.5785	0	3.47469	0
Mybl1	0	2.5765	-1.22144	3.7572	0
Nrg1	0	2.57505	0	3.44886	0
Gm609	0	2.5716	0	2.85216	0
Col3a1	0.623423	2.55886	0	2.44047	-3.11728
Hist1h3c	1.29317	2.55483	0	2.07072	0
Pcdhgc5	0	2.55431	0	0	0
Ube2c	0	2.55324	0	3.17358	-3.52675
Bub1	0	2.54847	0	2.78451	-4.24339
Ddi1	0	2.54691	0	2.30723	0
Kif2c	0	2.54639	0	3.28935	-3.63023
5330417C22Rik	1.08779	2.54594	0	2.15519	-1.81036
Spire2	0	2.54552	0	3.50289	0
Kif4	0	2.54205	0	2.79988	-3.60328
Gsta2	0	2.51882	0	2.41437	1.81126
Scn2a	0	2.51588	-2.04892	4.43914	0
Fam83b	0	2.51237	0	2.88897	0
Pi15	0	2.51093	0	2.16363	-2.92565
Olfml2a	0	2.50734	0	2.87243	0
Myo5c	0	2.50473	0	1.94164	0
Lrrc55	0	2.50328	0	3.80112	0
Knstrn	0	2.49449	0	3.24074	-3.81051
Eps8l3	2.24746	2.49403	2.77695	0	0
Hist1h2bf	0	2.49233	0	1.36465	0
Baiap2l2	0	2.48767	0	1.73077	0
Esco2	0	2.48731	0	2.94818	-2.8016
Sgo1	0	2.48594	0	2.20193	-3.73242
Neurl1b	0	2.47841	0	2.7097	-2.95502
Noct	0	2.46371	0	2.85839	0.968292
Cdca3	0	2.46229	0	2.81501	-2.98356
Ccnb1	0	2.46162	0	3.57274	-3.85833
Gpc3	1.0482	2.45961	0	1.56437	-5.05667
Rad54b	0	2.45888	0	1.7891	-2.45585
Cenpu	0	2.45357	0	2.26045	-2.97863
Kif12	0	2.45343	0	2.54714	0
Espl1	0	2.4518	0	2.71584	-3.30851
Tnfrsf10b	0	2.45115	0	2.97642	0
Cdc20	0	2.44755	-1.06937	3.4426	-3.82973
Cftr	1.49594	2.43783	0	1.47405	0
Ehf	0	2.42098	0	3.04428	0
Tspan8	0.93087	2.41917	0	2.69164	0.607387
Ska3	0	2.41644	0	2.18562	-3.84144
Igf2bp3	0	2.41559	0	2.27926	-7.67152
Gata3	0	2.41415	0	0	0
Anln	0	2.40609	0	2.76146	-3.1843
Chtf18	0	2.3973	0	2.2841	-3.13616
Trim59	0	2.39504	0	2.5757	-3.2166
Cdhr2	3.43018	2.39452	4.10744	0	0
Fanci	0	2.39294	0	2.15881	-3.85929
Plch1	0	2.39184	0	2.3385	0
Hist1h1a	0.974593	2.38556	0	1.85177	0
Ankle1	0	2.38486	0	2.03206	-4.01927
Cenph	0	2.38018	0	2.52723	-3.59392
Slc5a1	2.77265	2.37843	3.03124	0	0
Fignl1	0	2.37756	0	2.24275	-3.22831
Fmod	0	2.37484	0	2.71316	-0.891205
BC016579	0	2.37388	0	2.32214	0
Ptgfr	0	2.36942	0	2.36997	0
Aspm	0	2.36391	0	2.74771	-2.99241
Dnm1	0	2.3602	0	1.46093	0
Scd2	0.928181	2.35955	0	1.98745	-0.907382
Melk	0	2.3572	0	2.59351	-4.06828
Wfdc15b	0	2.35599	0	3.34017	0
Adamts16	0	2.35361	0	2.54039	0
Cep55	0	2.34895	0	2.76522	-3.52451
Psat1	0	2.34529	0	2.63775	-3.0246
Gprc5b	0	2.34417	0	3.04122	0
Epcam	1.76501	2.34403	1.24612	1.41323	0
Sdk1	0	2.3422	0	2.9083	-4.26799
Mmp13	0	2.33556	0	3.24028	0
Aoc1	2.42855	2.33536	0	0	0
Cmya5	0	2.33311	0	0	0
Zwilch	0	2.33201	0	2.38798	-2.90656
Bex4	0	2.3319	0	2.63446	-4.16882
Ckap2	0	2.33189	0	3.41158	-3.34951
Col4a4	0	2.32894	0	2.24693	-2.52182
Rragd	0	2.32756	0	2.64967	0
Spag5	0	2.32568	0	2.46123	-2.97521
Fam83d	0	2.32327	0	3.25204	-3.12747
Pygo1	0	2.31641	0	2.05289	-3.14116
Kif20b	0	2.31367	0	2.90948	-2.89389
Igsf9b	0	2.31145	0	1.93336	0
Kif14	0	2.30692	0	2.7792	-3.86835
Tmem45a	0	2.30686	0	2.92079	0
Col1a2	0.72578	2.30464	0	2.23873	-2.63504
Clspn	0	2.30033	0	2.35081	-3.82062
Kif20a	0	2.29459	0	3.01578	-3.21167
Pls1	1.83955	2.29427	1.67807	0.597092	-3.55737
Sgo2a	0	2.29235	0	2.88542	-3.1372
Spdl1	0	2.28757	0	2.77834	-2.92073
Nusap1	0	2.28701	0	2.30819	-3.56986
Cx3cl1	0	2.27758	0	2.68277	0
Cenpi	0	2.26927	0	2.82069	-3.74714
Ltbp2	0	2.2672	0	2.80034	-1.41389
Kif11	0	2.26711	0	2.57217	-3.14703
Bub1b	0	2.26702	0	2.16255	-3.26023
Grip1	0	2.26458	0	2.44533	0
Ggt1	3.0263	2.26117	0	0	0
Arhgap11a	0	2.26017	0	2.39763	-2.92101
Cyp3a11	0	2.25949	0	2.15535	0
Tet1	0	2.24925	0	2.33483	0
Fancd2	0	2.24693	0	2.30889	-3.11625
Nav3	0	2.24621	0	3.1436	0
Sytl5	0	2.24195	0	2.16049	0
Pak6	0	2.24116	0	2.70048	0
Lox	0	2.23258	0	2.78326	-2.76572
Plekhh1	0	2.23067	0	1.83806	0
Cap2	0	2.23037	0	0	0
Hapln1	0	2.22828	0	2.83805	-1.84192
Mcm6	0.804684	2.2265	0	1.95167	-2.89742
Myc	0.761985	2.2235	0	2.01822	0
Stmn1	0.65212	2.22321	0	2.16958	-2.6051
Col6a3	0	2.21873	-0.622391	2.83055	-1.34937
Inava	0	2.21602	-1.63822	3.93633	0
Pygb	0	2.21526	0	2.60997	-1.43157
Cd209a	0	2.21494	0	1.99016	0
Itgb8	0	2.21432	0	2.69827	0
Itga8	0.58754	2.21168	0	2.50242	-1.00395
Pex5l	0	2.21115	0	0	0
Mmp12	0	2.21006	-1.9965	4.23397	0
Bard1	0	2.20864	0	1.9336	0
Sorcs3	0	2.2086	0	0	0
Clic6	0	2.20844	0	2.02166	0
Fam163a	0	2.19797	0	2.72458	0
Mmp2	0	2.19458	0	2.57437	-2.28343
Csmd3	0	2.19184	0	2.84063	0
Mis18bp1	0	2.19009	0	2.2506	-3.25775
Dclk1	0	2.18899	0	1.84606	0
Fam19a2	0	2.18771	0	1.52627	0
Pole2	0	2.18492	0	1.30684	-2.5954
Dnah11	0	2.18443	0	0	0
Cdc25c	0	2.18379	0	3.65151	-3.61189
Greb1l	0	2.18241	0	2.09197	-3.90903
Corin	0	2.17836	0	2.15681	0
Troap	0	2.17737	0	2.81364	-3.34171
Pclaf	0	2.17687	0	1.56417	-4.30266
Ect2	0	2.17399	0	2.6611	-2.71339
Ncaph	0	2.17353	0	2.33689	-3.03515
Dlg2	0	2.17264	0	1.75416	0
Hist1h3b	0	2.17187	0	1.11826	0
Cacnb3	0	2.17124	0	2.20625	-1.35959
Gm7173	0	2.16813	0	2.62091	0
Adamts12	0	2.16401	0	2.31544	-3.17372
Sapcd2	0	2.16226	0	3.21209	0
Prom1	0.911902	2.16171	0	2.19863	-3.19324
H1fx	0	2.16099	0	3.74485	0
S100a11	0	2.16032	0	2.96342	-0.698099
Adamts9	0	2.15495	0	2.30825	-2.0384
Myo15b	1.79907	2.15473	1.74378	0.869349	0
Cd24a	0.769643	2.14866	0	2.09438	-1.57205
Epb41l4a	0	2.14721	0	1.98454	0
Vldlr	1.19245	2.14535	0	1.3622	-2.5614
Plekhs1	0	2.14203	0	2.82397	0
Cip2a	0	2.13726	0	2.30397	-2.75297
Cd63	0	2.13194	0	2.65434	-2.4221
Fbn1	0.588451	2.12882	0	2.24603	-2.34347
Ctse	1.54442	2.12821	0	0	0
Kifc1	0	2.12473	0	3.00025	-3.62627
Veph1	0	2.12331	0	2.26893	0
Cspg4	0	2.11902	0	1.80226	0
Cttnbp2	0	2.11822	0	2.6852	0
Lrrc4	0	2.11771	0	1.36633	0
Scara3	0	2.11758	-0.868915	2.96103	0
Fam83a	0	2.11625	-1.39642	3.52735	0
Tedc1	0	2.10866	0	2.0624	-2.87335
Misp	1.78728	2.10671	1.79314	0.840218	0
Prtg	0	2.10584	0	2.66589	0
Mgat3	1.52518	2.10558	0	0.819355	0
BC147527	0	2.1044	0	2.80929	0
Frem2	0	2.10193	0	2.35219	0
Mns1	0	2.0983	0	1.45662	0
Klf5	1.4301	2.09789	0	0.885302	0
Cpxm1	0	2.09724	0	2.96079	-0.764282
9130230L23Rik	0	2.09688	0	0	0
Ankrd1	0	2.09674	0	3.19901	0
Col4a5	0	2.09639	0	2.47612	-2.72393
Prrg4	0	2.09528	0	3.14471	0
Chek1	0	2.09322	0	2.00009	-2.20462
Nipal2	0	2.09059	0	1.79967	0
Ppic	0	2.08704	0	1.71324	-2.82289
Fhl2	0	2.08683	0	3.1259	0
Car2	0.978083	2.07975	0	1.34846	-3.0277
Mdk	0	2.07957	0	2.54241	-2.34369
Themis	0	2.07272	0	1.58576	0
Kif15	0	2.07214	0	2.21413	-3.29311
Fstl1	0.610856	2.07109	0	1.96276	-2.66612
Col6a2	0	2.07042	0	2.29403	-1.71406
Cldn4	0	2.06847	0	2.9788	0
Mfap2	0	2.06687	0	3.00844	-3.04724
Pcyt1b	0	2.06175	0	1.99093	0
Glis3	0	2.06142	0	2.50815	0
Ncam1	0	2.05572	-1.55152	3.54394	0
1700034J05Rik	0	2.05563	0	1.20964	0
Hist1h2bb	1.11614	2.05516	0	1.23087	0
Hist1h3a	1.31534	2.05424	1.27529	0	0
Krt23	0	2.05336	0	2.31908	-2.00253
Sparcl1	0	2.05287	0	2.56375	0
Fermt1	0	2.05164	0	2.24741	0
Kif1a	0	2.05139	0	2.50627	0
Chrnb1	0	2.05031	0	2.39677	0
St14	1.01288	2.04655	0	2.16778	0
Plat	0	2.04631	-1.29652	3.32979	0
Dsn1	0	2.04595	0	1.94133	-2.56504
Abcc4	0	2.04333	0	2.27593	0
Flrt3	0	2.0426	0	0.945238	0
Zdhhc15	0	2.04067	0	0	0
Plppr1	0	2.02881	0	1.97021	0
Cfap45	0	2.02774	0	0	0
Rad51	0	2.02731	0	2.13993	-3.2291
Creb5	0	2.02657	0	2.62758	0
BC030867	0	2.02488	0	2.52276	0
Nup62cl	0	2.02464	0	2.24236	0
Foxj1	0	2.02375	0	2.72823	0
Sema5a	0	2.02354	0	2.37825	-0.943564
Kif22	0	2.02061	0	2.35492	-3.20418
Ptk7	0	2.02017	0	2.45131	-2.13805
Inpp5j	0	2.01952	0	2.4441	0
Ncapg2	0	2.01017	0	2.26763	-2.41789
Rab25	0	2.00908	0	1.3955	0
Cldn7	1.82676	2.00897	1.6151	1.06225	0
Epn3	0	2.00836	0	2.19251	0
Ms4a14	0	2.00585	0	2.89298	0
Fgd1	0	2.00555	0	2.17799	-2.34161
Gins2	0	2.00414	0	2.09994	-3.146
Nr4a3	0	2.00308	0	2.54049	0
Pole	0.861924	2.00033	0	1.72911	-1.8719
Nid1	0	1.99876	0	1.8027	-2.10202
Lama2	0	1.99749	0	2.62228	-1.53404
Arhgef39	0	1.99649	0	1.82922	-3.38776
ccdc198	0	1.9959	0	2.52031	0
Cyp2a5	0.843425	1.99522	0	1.59694	0
Ly6d	-0.737488	1.98871	-2.00802	4.03954	1.42037
Ddr1	0	1.98713	0	2.87965	0
Rab27b	0	1.98621	0	2.10756	0
Itgax	0	1.98311	-1.07204	3.00244	0
Hist1h4a	0	1.98284	0	1.59406	0
Hist1h3i	0	1.98141	0	1.79427	0
Myo7b	1.58889	1.97782	0	1.6025	0
Pof1b	0	1.97608	0	1.8892	0
Bicc1	0	1.97585	0	2.60288	-0.599933
Spp1	0	1.97564	0	2.53206	0
Mex3a	0	1.97434	0	2.34553	0
Aif1l	0	1.97428	0	2.83691	0
Ddit4l	0	1.97161	0	2.52563	0
Hells	0	1.96945	0	1.74249	-2.34805
Hist1h4k	0	1.96502	0	2.0073	0
Krt19	1.8574	1.96444	1.78514	0.641627	-0.761282
Loxl1	0	1.95947	0	2.63436	-1.06727
Mtcl1	0	1.95763	0	2.4212	0
Mfge8	0	1.95678	0	1.88501	-1.10475
Fam107a	0	1.95654	0	1.24704	0
Ube2t	0	1.95257	0	1.8654	-2.33879
Svep1	0	1.95227	-1.55787	3.44841	0
Ccdc80	0	1.94919	0	2.15666	-2.2237
Itgae	0	1.94839	0	1.98085	0
Sobp	0	1.94469	0	2.10404	0
Ephb2	0	1.94261	0	2.63305	0
Cyp4a14	0	1.94062	0	1.5119	-1.85483
Tmem150c	0	1.93656	0	0	0
Slamf7	0	1.93215	0	2.63286	0
Dnah5	0	1.93146	0	2.01838	0
Loxl2	0	1.93014	0	1.76149	-2.65907
Orc1	0	1.92443	0	1.65419	0
Macc1	0	1.92275	0	2.4331	0
Fndc10	0	1.91868	0	2.41839	0
Frem1	0	1.91841	0	2.29215	-1.39394
Sox4	0	1.91745	0	2.56255	-1.10769
Igsf9	1.3563	1.9171	0	0.831001	0
Sfrp1	0	1.91401	0	2.1027	-1.33991
Phgdh	0	1.91208	0	1.48776	0
Tinag	0	1.91199	-2.43402	4.45435	0
Rassf9	0	1.91198	0	2.28025	0
Mcm5	0	1.91038	0	1.89421	-2.98333
Slc44a4	1.43488	1.90876	0	1.06587	0
Ace	0.94864	1.90872	0	1.68905	0
Gabrp	0	1.90306	0	1.78117	0
Clmp	0	1.90197	0	2.16614	-0.982404
C1qtnf6	0	1.90149	0	2.03527	-3.11009
Osbpl6	0	1.89764	0	0.9302	0
Lum	0	1.89614	-0.724258	2.65734	-0.698695
Neurl1a	0	1.89171	0	2.18765	0
Pkmyt1	0	1.89089	0	2.15925	-2.52063
Arhgap22	0	1.89069	0	2.68111	0
Exo1	0	1.88581	0	1.97424	0
Robo2	0	1.88317	0	2.23221	-0.724336
Tacc3	0	1.8813	0	2.07714	-2.44463
Slc51b	0	1.881	0	1.98548	-2.49286
Lig1	0.933242	1.87829	0	1.32698	-2.43558
Zfp184	0	1.87804	0	1.55459	0
Aldh1a2	0	1.87548	0	1.78799	0
Sh3rf3	0	1.87364	0	0	0
Nt5e	0.755133	1.87254	0	1.35079	-3.53825
Shisa4	0	1.8722	0	2.51701	0
Apobec3	0	1.87166	0	1.8353	-0.719917
Plod2	0	1.87064	0	1.88144	-1.26782
Bmp8b	0	1.86967	-2.6504	4.44579	0
Mgl2	0	1.86891	0	0	0
Emp1	0	1.86753	-0.926769	2.90298	-0.894627
Haspin	0	1.86631	0	1.35982	-2.22535
Calml4	0	1.86621	0	1.15295	-2.83762
Pparg	0.964634	1.86542	0	1.2647	0
Cep112	0	1.86309	0	2.13696	0
Slc6a7	0	1.86222	0	3.12006	0
Rmi2	0	1.85966	0	0	0
Cyp4a31	0	1.85738	0	1.81631	-2.8237
Ercc6l	0	1.85588	0	1.94892	-3.01766
Itgbl1	0	1.85549	-1.27094	3.07887	0
Kif23	0	1.85326	0	1.84975	-2.68802
Cib3	0	1.85219	0	2.13074	1.97647
Adam8	0	1.85062	0	2.75041	0
Itgb6	0	1.8497	-1.37838	3.13611	0
Lgals1	0	1.84679	0	1.61571	0
Cand2	0	1.84627	0	2.01116	-2.2814
Rad51b	0	1.84539	0	2.57317	-2.16383
Efcab11	0	1.84525	0	3.11333	0
Gdpd3	0	1.84376	0	1.2382	0
Cenpp	0	1.84321	0	1.82473	-2.19771
Gm21188	0	1.84167	0	2.43312	0
Golm1	0	1.84054	0	2.111	-1.03049
A4galt	0	1.8389	0	2.03458	0
Sytl2	0	1.83854	0	1.90341	-0.865103
Abcd2	1.24633	1.83812	0.993362	0.79656	-3.0758
Dtna	0	1.83784	0	2.25361	0
H2-M2	0	1.83711	0	2.37299	0
Slc39a4	0	1.8369	0	1.48579	-1.41549
Dtl	0	1.83679	0	1.78404	-2.49357
Adamts2	0	1.83512	0	2.10548	-1.75774
Nek5	0	1.8339	0	0	0
Spc25	0.827381	1.83122	0	1.41217	-2.03916
BC067074	0	1.83057	0	2.43308	0
Slc28a3	0	1.8304	0	1.48042	0
Cldn6	0	1.82987	0	2.09286	0
Casq2	0	1.8297	0	2.05151	0
Slc4a3	0	1.82949	0	1.85006	0
Dnah12	0	1.82775	0	0	0
Cnksr1	0	1.82461	0	1.91296	0
Acot2	0	1.82308	0	2.24106	0
Ctsk	0	1.82271	0	2.3529	-1.36811
Nebl	0	1.82057	0	2.6678	0
Cldn8	0	1.81866	0	2.4325	0
Col4a3	0	1.81758	0	1.69309	-4.47013
Cidec	0	1.81654	-1.01778	2.91211	2.48368
Cilp	0	1.81638	0	2.03049	0
Hpca	0	1.81506	0	2.50957	0
Stat4	0	1.81136	0	1.6889	0
Sh3pxd2b	0	1.80927	0	2.34658	-0.601869
Cercam	0	1.80623	0	1.51034	0
Opcml	0	1.80514	0	3.43019	0
Enah	0	1.80356	0	2.29034	-1.15382
Casp12	0	1.80079	0	2.30372	0
Lca5	0	1.79982	0	1.65585	0
Ccdc34	0	1.79888	0	1.70592	-1.93427
Kdelr3	0	1.79884	0	1.80698	-2.67618
Hist1h3d	0	1.79692	0	1.40577	0
Mmp7	0	1.79095	0	4.05017	0
Prr15l	0	1.78885	0	1.23889	0
Ccdc18	0	1.78661	0	2.06872	-1.75669
Cx3cr1	0	1.78624	-1.40207	3.15227	0
Mrc2	0	1.78593	0	2.46003	0
D330045A20Rik	0	1.7818	0	1.95429	0
Dnah7b	0	1.78164	0	2.58585	0
Hnf4g	2.17667	1.77763	0	0	0
Anxa2	0	1.77691	0	2.02851	-1.23576
Psrc1	0	1.77463	-1.47049	3.05692	0
Col4a6	0	1.77443	0	2.71636	0
Plxdc2	0	1.77423	0	2.12203	0
Src	0	1.77402	0	1.61496	-1.43954
Zfp473	0	1.77399	0	2.18504	0
Adamts5	0	1.77125	0	2.03177	-1.32031
Ticrr	0	1.77119	0	1.99597	0
Vegfd	0	1.76783	0	1.90303	-0.908542
Rgs17	0	1.76364	0	1.97042	0
Ifnlr1	0	1.76253	0	1.79965	0
Cenpn	0	1.76236	0	1.92502	-1.75941
Pappa	0	1.76214	-1.60953	3.2395	0
Shc2	0	1.76173	-1.99233	3.69967	0
Eme1	0	1.76131	0	1.88132	0
Fndc5	0	1.75836	0	1.40695	0
Zfp185	0	1.75675	0	1.85449	0
Cdca8	0	1.7566	0	1.99897	-2.46325
Traf1	0	1.75555	0	1.85901	0
Pkhd1	0	1.75503	0	1.95653	-0.982736
Fbln2	0	1.75461	0	1.92269	-1.53444
Erich5	0	1.7539	0	2.36482	0
Eda2r	0	1.75312	-1.17622	2.89182	0
Wnk2	0	1.75093	0	2.24049	0
Tnc	0	1.75056	0	2.54346	-1.59249
Incenp	0	1.74911	0	1.86863	-2.64751
Tesc	0	1.7476	0	0	0
Spint1	1.16725	1.74738	0	1.37931	0
Il17re	0	1.74673	0	2.00377	0
Zfp423	0	1.74588	0	1.66836	0
Fxyd3	0	1.74399	0	2.70777	0
Sparc	0	1.7428	0	1.5212	-3.171
Fkbp10	0	1.74252	0	1.89841	-2.0769
Pqlc3	0	1.74193	0	1.58161	0
Myo18b	0	1.74079	0	0.903088	0
Nek2	0	1.74073	0	1.93578	-2.0908
Ccn5	0	1.74046	0	2.00615	0
Ttll10	0	1.74025	0	2.41881	0
Gpr21	0	1.73879	0	1.32164	0
Cd36	0.614377	1.73755	0	1.48875	0
Lrrn1	0	1.73746	0	1.60926	0
Vxn	0	1.73516	0	2.37821	0
Runx2	0	1.73284	0	2.22745	0
Adamtsl1	0	1.73225	0	2.65009	0
Ifi27l2b	0	1.7319	0	2.11807	0.744779
Pak1	0	1.73182	0	1.65672	-1.61352
Cdh11	0	1.73137	0	2.57889	0
Smim24	2.93243	1.72958	3.69569	-0.92301	0
Rad54l	0	1.72932	0	1.65877	-3.68309
Ace2	2.33928	1.72863	2.75539	0	0
Tox3	0	1.7272	0	0	0
Siglecf	0	1.72385	0	0	0
Ugt1a9	0	1.72173	0	2.18491	0
Lypd6	0	1.72083	0	2.03192	0
Smc2	0	1.72063	0	1.83651	-2.07849
Ak1	0	1.71774	0	2.41705	0
Timp1	0	1.71754	0	3.64561	0
H2-Q1	0.845235	1.71707	0	1.14047	-2.0827
Hist1h2ae	0	1.71666	0	1.55886	0
Hist1h2bh	0	1.71656	0	1.32724	0
Cyp1b1	0	1.71596	-1.07769	2.81067	0
Rgs1	0	1.71477	0	2.12992	0
Cfap69	0	1.71443	0	1.78144	0
Rasef	0	1.71312	0	1.67775	0
Rrm2	0.619932	1.71194	0	1.50436	-2.02084
Flt3	0	1.71184	0	2.6537	0
Fbln5	0	1.71149	0	1.78332	-1.26949
Sh2d1b1	0	1.70988	0	3.04613	0
Asf1b	0	1.70828	0	1.57936	-2.48253
Ms4a7	0	1.70815	0	2.76452	0
Col6a1	0	1.70783	0	1.91152	-1.44946
Prdm16	0	1.70557	0	1.3701	0
Cdkn2b	0	1.70397	0	0	0
Trim43c	0	1.70047	0	1.92503	0
Epdr1	0	1.69924	0	2.85938	-2.37303
Angpt1	0	1.69806	0	1.71567	-0.591491
Serpine1	0.857675	1.69729	0.814082	0.687468	-3.1091
Gpm6b	0	1.69641	0	1.52559	-0.996685
Slfn9	0	1.69324	0	1.61106	-1.81296
Mthfd1l	0	1.68987	-0.959905	2.63549	-0.884908
Degs2	0	1.68894	0	1.49789	0
Tgfb2	0	1.68725	0	2.45838	-1.12329
Mal	0	1.68721	0	2.58714	0
Shisa2	0	1.68568	0	1.74996	0
Mms22l	0	1.68532	0	1.67466	-1.59594
Ranbp17	0	1.684	0	1.79806	0
Defb1	0	1.68369	0	1.21599	-2.89071
Cklf	0	1.68305	0	1.33617	-0.966215
Ndrg4	0	1.68266	0	0	0
Fmo2	0.609421	1.68245	0	1.58173	-1.91483
Usp43	0	1.68017	0	2.79828	0
Abhd2	0	1.67517	0	1.46875	-1.12195
Myo5a	0	1.67343	0	2.33233	0
Cd34	0	1.67288	-0.904932	2.55587	-0.871496
Sema3a	0	1.67101	0	1.76787	0
Egflam	0	1.67081	0	2.2017	0
Smoc2	0	1.67053	0	1.73455	-1.98334
Dnah1	0	1.66945	0	2.29155	0
Cfap70	0	1.66769	0	0	0
Slc52a3	0	1.66752	0	1.63937	0
Hr	0	1.66655	-1.88794	3.52547	0
Lamc3	0	1.66492	-1.28762	2.93113	0.798024
Gpr132	0	1.66361	0	2.23541	0
Entpd2	0	1.66346	0	1.14238	0
Siglech	0	1.6627	0	2.15328	0
Kcne3	0	1.66155	0	2.33128	-0.636401
Ildr1	0	1.66142	0	3.07084	0
Hist1h4f	0	1.66123	0	1.4811	0
Epb41l1	0	1.66082	0	1.97809	0
Espn	0	1.65502	0	1.36605	-1.70237
Lrrc39	0	1.65322	0	1.45334	0
Dcx	0	1.65235	0	2.17782	0
Zfp449	0	1.65096	0	1.45946	-1.51602
Amn	0	1.64995	0	1.98705	0
Pcdhb19	0	1.6479	0	2.00524	0
Kifc5b	0	1.6473	0	1.95702	-2.23842
Atp10a	0	1.64527	0	2.43853	0
Mboat2	0	1.64502	0	2.05313	0
Ssc5d	0	1.64325	0	1.70839	0
Asxl3	0	1.64252	0	3.22739	0
Synpo2	0	1.64206	0	1.23104	0
Pitpnm3	0	1.6418	0	0	0
Nqo1	0	1.64124	0	1.82216	-1.1406
Capn6	0	1.64058	0	2.07147	-1.95531
Esm1	0	1.63965	0	2.17506	0
H2-Eb2	0	1.63779	0	1.81035	0
Gpr18	0	1.63758	0	1.19658	0
Col8a2	0	1.63644	0	1.4166	0
Adgrl3	0	1.63489	0	1.30502	0
Tmem200a	0	1.63392	0	3.38514	0
Frmd5	0	1.6326	-2.90143	4.24789	0
Atf3	0	1.63219	0	2.67352	0
Cacna1c	0	1.63075	0	1.53888	0
Col8a1	0	1.63064	0	1.83353	-0.955669
Meox1	0	1.63055	-1.58246	3.16345	0
Klf6	0	1.62956	0	1.75468	-0.883888
Tgfb3	0	1.62948	0	1.84129	-0.65187
Glipr1	0	1.62927	0	1.90044	0
Fanca	0	1.62892	0	1.62663	-2.3724
Dcdc2a	0	1.6287	0	1.90095	0
Angptl1	0	1.62729	0	1.42853	0
Gas2l3	0	1.62529	0	1.67815	-1.35716
Dzip1l	0	1.62489	0	1.99298	0
Plagl1	0	1.62463	0	1.78973	-1.68153
Samd4	0	1.62282	0	1.97345	0
Uap1l1	0	1.62227	0	1.93194	-0.693775
Itga6	0.783487	1.61987	0	1.29393	-2.03281
Il7r	0	1.61914	0	1.65036	0
Spats2l	0	1.61905	0	2.17259	-1.21108
Jag2	0	1.61778	0	2.2761	0
Zfp934	0	1.61725	0	1.74175	0
Trabd2b	0	1.61711	0	2.11929	0
Fcho1	0	1.61677	0	1.68441	0
Igfbp1	0	1.6167	-0.802254	2.38671	-1.74822
Col5a2	0	1.61548	-0.665475	2.18138	-1.56786
Ccdc120	0	1.61406	-1.42046	3.07543	-1.2645
Ccdc3	0	1.61357	0	2.22728	0
Tbx20	0	1.61246	0	2.03871	0
Lrrtm2	0	1.61201	0	1.13421	0
Cep72	0	1.61077	0	1.49094	-1.66277
Triqk	0	1.60939	0	1.51448	0
Gdf3	0	1.60932	0	3.22015	0
Tenm4	0	1.60921	0	2.07472	0
Setbp1	0	1.60584	0	1.78435	0
Gpr34	0	1.60573	0	2.39176	0
Ctxn1	0	1.60557	0	0	0
Olfm2	0	1.60548	0	1.56528	0
Tmem178	0	1.60174	0	1.25411	0
Ahnak2	0	1.60107	0	1.74209	0
Gab3	0	1.60082	0	1.2417	0
Sectm1a	0	1.59548	0	1.2649	-1.54632
Muc1	0	1.59535	0	1.9448	0
Zfp651	0	1.59471	0	1.43489	-1.38942
Cacna1e	0	1.59441	0	1.48179	0
Tagln2	0	1.59335	0	1.67503	-1.40743
Mmp24	0	1.5933	0	2.33292	0
Klc3	0	1.5932	0	2.10548	0
Pdgfd	0	1.59084	0	1.86808	0
Smtnl2	0	1.5906	0	1.5648	-1.3841
Pcdhb16	0	1.58759	0	1.79175	0
Adgrg1	0	1.58621	0	1.77668	-0.93949
Plxna3	0	1.58235	0	1.74332	0
Sgpp2	0	1.58203	0	1.09604	0
Clcf1	0	1.58188	0	2.64537	0
Dpt	0	1.58092	-1.06154	2.67746	0
Nhs	0	1.58078	0	2.09688	0
Emp2	0	1.58075	0	2.05904	0
Tmsb10	0	1.58015	0	1.6175	-1.40519
Fblim1	0	1.57961	0	1.92788	-0.621897
Cdca7l	0	1.57933	0	1.73783	-3.35173
Mad2l1	0	1.57898	0	1.84366	-2.17526
Gpx3	0	1.57791	0	2.01226	0
Abcc5	0	1.57735	0	1.68672	-0.764969
Cdkn1a	-0.668811	1.57681	-1.08945	2.67953	-0.887559
Arhgef2	0	1.57526	0	2.18851	-0.829072
Clip3	0	1.57493	0	2.13293	0
Cd83	0	1.57443	0	1.70611	-0.972927
H2-Oa	0	1.57398	0	2.59367	0
Bhlhb9	0	1.5734	0	1.12763	-3.04898
Vcam1	0	1.57325	0	1.55318	-1.2458
Elf3	0	1.57302	0	1.5843	0
Cd244a	0	1.57211	0	2.16339	0
Ifi213	0	1.57154	0	1.62751	-0.74754
Dusp2	0	1.57061	0	1.81163	0
Pmepa1	0	1.56978	0	2.08203	0
Syt7	0	1.56962	0	2.38983	0
Esrp1	0	1.56962	0	1.50436	0
Ugt8a	0	1.56937	0	2.53544	0
Mxd3	0	1.56921	0	1.75159	-4.13382
Celsr2	0	1.5684	0	2.05199	0
Cdc25b	0	1.56804	0	1.20205	-2.07639
Xylt1	0	1.5671	0	2.1811	0
Grhl2	0	1.56671	0	2.00622	0
Cd8a	0	1.56579	0	1.77579	0
Aunip	0	1.56475	0	2.15666	0
Gpat3	0	1.56445	-0.83013	2.59141	-0.756011
Nfatc2	0	1.56336	0	2.04728	0
Hmgn3	0	1.56098	0	0.900169	0
Hist1h3f	0	1.55953	0	1.06187	0
Slc25a4	0.841452	1.55946	0.722687	0.729973	-2.56724
Vsig10	0	1.55936	0	1.75469	-1.49342
Aurka	0	1.55886	0	1.79836	-3.01669
Lamc2	0	1.55772	-1.33967	2.78099	0
Olfml3	0	1.55473	-0.981923	2.55853	0
Cpxm2	0	1.55442	-1.66589	3.14789	0
Gpx7	0	1.55419	0	1.7697	-2.44686
B4galt2	0	1.55408	0	1.63568	0
Pcdhb9	0	1.55272	0	2.18782	0
Vgll3	0	1.55074	0	2.09683	0
Gal3st1	0	1.55002	0	1.7813	-0.732545
Pcdh11x	0	1.54942	0	2.39581	0
Ccl5	0	1.54796	0	1.82657	-0.864817
Peg3	0	1.54674	0	1.76561	-2.65359
Col5a1	0	1.5463	0	1.42535	-2.61559
Zfp827	0	1.54604	0	1.30092	0
Ccdc68	0	1.5435	0	1.39394	-1.27637
Ska1	0	1.54281	0	2.92905	-4.62763
Slc12a8	0	1.5384	0	1.52596	0
Cysltr1	0	1.53788	0	1.55256	-0.698075
Timp2	0	1.5378	0	1.73969	-0.608495
B9d1	0	1.53171	0	1.72326	0
Ppl	0	1.53137	0	2.04102	0.767175
Obscn	0	1.53108	0	0	0
Col4a2	0	1.53105	0	1.54949	-2.01811
Glra3	0	1.5297	0	1.87795	0
Gm9821	0	1.52828	0	0	0
Fam13c	0	1.52787	0	2.4061	0
Ptpn13	0	1.52648	0	1.9779	-0.974832
Hsd17b6	0.858018	1.52641	0.597083	0.90953	-1.16537
Cxcl10	0	1.52172	0	1.50607	-0.759117
Kcnq5	0	1.52109	0	1.70452	0
Fstl3	0	1.52055	0	0	0
Thsd4	0	1.51997	0	1.86124	-0.674047
D130040H23Rik	0	1.51724	0	1.40204	0
Runx3	0	1.51318	0	2.17505	0
Kcnma1	0	1.51305	-1.27016	2.59104	0
Fchsd1	0	1.512	0	2.25407	0
Rflnb	0	1.51068	0	1.19179	-1.3363
Antxr1	0	1.51014	0	1.76707	-1.31351
Auts2	0	1.50822	0	1.91497	0
Fxyd6	0	1.50581	0	1.82432	0
Gpr68	0	1.50573	0	1.52494	0
Bgn	0	1.50352	0	1.64981	0
Olfml2b	0	1.50324	0	1.78801	-1.25996
Lrrc75b	0	1.50274	0	0	0
Pheta2	0	1.50202	0	1.50747	0
Hpgds	0	1.50191	0	1.83432	0
Ptgfrn	0	1.50153	0	1.54749	-0.901326
Zfp618	0	1.50102	0	1.47563	-2.89093
Bicd1	0	1.49933	0	2.25352	0
Tmem136	0	1.49889	0	1.93264	0
Col4a1	0	1.49748	0	1.50187	-1.97903
Gpnmb	-1.13603	1.49472	-3.10528	4.56579	0
Ddias	0	1.49465	0	1.86714	-1.37546
Vim	0	1.49177	0	1.64364	-0.887303
Arhgap44	0	1.48993	-1.19887	2.59181	-0.8421
Cln6	0	1.48923	0	0.998282	-0.808685
Lrp8	0	1.48874	0	0	0
Grb10	0	1.48839	0	1.59024	-2.50554
Chaf1a	0	1.48771	0	1.40849	-2.00797
Igfbp7	0	1.48626	0	1.47392	-0.674777
Limk1	0	1.48595	0	1.70177	-0.656462
Mpp2	0	1.48536	0	1.75645	0
Scn7a	0	1.48504	0	2.01586	0
Ccdc136	0	1.48497	0	2.07958	0
Card11	0	1.48438	0	1.84157	0
Cpt1c	0	1.48345	0	1.67528	0
Ubash3a	0	1.48278	0	0	0
Parp8	0	1.48195	0	1.62136	-0.609684
Mgp	0	1.4818	0	1.48231	-1.99015
Serpinb8	0	1.4813	0	1.24603	-0.954192
Ccl7	0	1.48122	0	0	0
Rhox5	0	1.47958	0	0	0
Mapk13	0	1.47894	0	0	0
Aebp1	0	1.47799	0	1.46469	-0.966017
Pif1	0	1.47786	0	2.34756	0
Prrx1	0	1.47769	0	1.31876	0
Ulbp1	0	1.47733	0	1.37918	-2.09068
Unc119	0.7735	1.47541	0	0.752322	-1.11032
Adamtsl2	0	1.47401	-1.0977	2.57108	0
Elmo1	0	1.47296	0	1.49542	-0.77861
Fbln1	0	1.4712	0	2.17275	-0.741204
Adam22	0	1.47115	0	1.6209	0
Npnt	0	1.47105	0	1.37833	-2.23475
Vcan	0	1.47101	0	1.95232	0
Dbf4	0	1.47025	0	1.5504	-1.56314
Thbs1	0	1.46719	0	1.78299	-1.11586
Itga2	0	1.46719	0	1.42869	0
Syngr1	0	1.4656	0	2.6176	0
Chst11	0	1.46452	0	2.02774	0
Rtl6	0	1.46367	0	1.74469	0
Rassf10	0	1.46326	0	2.01965	0
Epha3	0	1.46251	0	1.87127	-1.24494
Tnfsf8	0	1.46245	0	0	0
Itpr3	0	1.46168	0	1.20844	-0.990756
Il21r	0	1.46164	0	1.80394	0
Myof	0	1.46134	0	2.03283	0
Pcdh17	0	1.4607	0	1.28975	-1.74201
Eif5a2	0	1.46017	0	1.4719	0
Mab21l3	0	1.45912	0	2.42521	0
Kif18a	0	1.45911	0	1.89965	-2.04866
Adam12	0	1.45845	0	1.29795	0
Mamld1	0	1.45827	0	1.72624	-0.662435
Panx1	0	1.45803	0	1.65874	-1.59147
Phf11d	0	1.45782	0	1.36834	-0.728111
Btla	0	1.45731	0	1.42414	-0.729159
Mdm1	0	1.4573	0	1.63459	-1.94649
Ppp1r26	0	1.45532	0	2.31002	0
Sphk1	0	1.45477	0	2.57055	0
Akr1b7	2.47873	1.4535	2.58709	-1.26945	-4.50509
Tril	0	1.45224	0	2.21204	0
Aldh1b1	0	1.45124	0	1.70095	0
Plxna4	0	1.45116	0	1.72818	0
Tm4sf20	2.16708	1.45083	2.44872	0	0
Clec9a	0	1.45064	0	1.08565	0
2025-09-06	0	1.44943	0	1.16487	0
Dusp5	0	1.44873	0	1.57208	-1.1372
Map4k4	0	1.44832	0	1.74034	-0.964442
Lpar1	0	1.44799	0	1.64157	-0.921803
Dpysl3	0	1.44433	0	1.51202	-1.23415
Prmt2	0	1.44406	0	1.60071	-0.730897
Hebp2	0	1.44399	0	1.70585	-2.70358
Ebi3	0	1.44337	0	1.40357	0
Tcf19	0	1.44256	0	1.11638	-1.9669
Wnt5a	0	1.44026	0	1.74182	-0.725896
Pask	0	1.43941	0	1.03634	-1.91819
2310007B03Rik	0	1.43869	0	1.59791	0
Trim46	0	1.43838	0	2.34726	0
Ifi206	0	1.43698	0	1.916	-0.717502
Rims2	0	1.4362	0	1.67084	0
Cdc7	0	1.43606	0	1.31064	0
Bex3	0	1.43491	0	1.34964	-2.48881
Fam180a	0	1.43464	-1.22398	2.68812	0
Ifi211	0	1.43403	0	1.54904	-0.773024
Pfkp	0	1.43338	0	1.94099	0
Sema4d	0	1.43169	0	2.1154	-0.679944
Lpcat4	0	1.42985	0	1.79385	0
Cd276	0	1.42968	0	1.51538	-1.40372
Adamts4	0	1.42933	0	2.143	0
Prdm5	0	1.42891	0	1.93504	0
Trip13	0	1.42673	0	1.45442	-2.19575
Evc	0	1.42611	0	1.90823	0
Selenom	0	1.42555	0	1.25878	0
Sinhcaf	0	1.42495	0	1.42007	-0.801951
Afap1	0	1.42388	0	1.66059	-0.723566
Phlda3	0	1.42378	0	2.1955	-0.658324
Ltbp3	0	1.42246	0	1.94432	-0.814898
Pcdhgb1	0	1.4219	0	1.46448	0
Prim1	0	1.4212	0	1.27064	-2.07816
Gtse1	0	1.42099	0	2.15735	-1.46123
Aspn	0	1.42074	0	1.32251	-2.06475
Matn2	0	1.4207	0	1.24946	-1.63208
Rbl1	0	1.42046	0	1.45976	-2.2352
Stambpl1	0	1.41964	0	1.38835	-2.12462
Bdkrb2	0	1.41963	0	2.30644	0
Ddah2	0	1.41877	0	1.15234	-1.44086
Unc5b	0	1.41793	0	1.8147	0
Bcl2a1b	0	1.41786	0	2.21111	0
Eid3	0	1.41699	0	1.05282	0
Ntrk3	0	1.41584	0	1.70991	0
Dact3	0	1.41443	0	2.2451	0
Atp1b2	0	1.41195	0	2.12628	0
Atp1a2	0	1.41013	0	1.49205	-0.954852
Jchain	0	1.41006	0	0.806212	1.92864
Ccnd1	0	1.40955	-0.674571	2.10898	0
Ncapd2	0	1.40873	0	1.51568	-2.17377
Cygb	0	1.40622	0	2.01526	0
Thbs2	0	1.40591	0	1.92766	-1.38257
Palm	0	1.40324	0	1.34029	-0.729872
Ptger4	0	1.40185	0	1.53206	0
Htra1	0	1.40144	0	2.10611	0
Galnt3	0	1.40134	0	1.50088	0
Vill	0	1.40099	0	1.46308	-1.72727
Hist1h4j	0	1.40029	0	1.28823	0
Runx1	0	1.39891	0	1.81204	0
Rgma	0	1.39884	0	1.84158	0
Ypel1	0	1.3977	0	1.21143	0
Ltk	0	1.39766	0	0	0
Zfp52	0	1.39754	0	1.12626	0
Oasl2	0	1.39685	0	1.60986	-0.816361
St8sia6	0	1.39663	0	2.28467	0
Shisal1	0	1.39564	0	0	0
Cxcr4	0	1.39556	0	2.3568	-0.844611
Npas3	0	1.3949	0	0	0
Scml4	0	1.39181	0	1.67539	0
Trem2	0	1.39172	-1.83792	3.1314	0
Kcnn4	0	1.39132	0	2.30878	0
Dlg4	0	1.39095	0	1.41291	-0.982753
Lrrc8b	0	1.39089	0	0.95379	-1.69106
Fscn1	0	1.39051	0	1.44478	-1.53389
Gpr137b	0	1.39046	0	1.23325	0
Slain1	0	1.38785	0	1.57233	0
Spta1	0	1.38778	0	0	0
Sorcs2	0	1.38688	0	1.45909	0
Pcdhga1	0	1.38681	0	1.50095	0
B3galt2	0	1.38615	0	1.03004	0
Arhgef28	0	1.38573	0	1.77509	0
Lhfp	0	1.38433	0	1.41193	-0.843255
Plin4	0	1.38407	0	1.4512	1.268
Islr	0	1.38349	0	1.77246	0
Apoa4	0	1.38343	0	1.73219	1.62315
Strip2	0	1.38305	0	1.95006	0
Ccr2	0	1.38283	0	1.81312	0
App	0	1.38266	0	1.44883	-0.959662
Lgi2	0	1.38143	0	2.23207	0
Glipr2	0	1.3813	0	1.5025	-1.01887
Tmem86a	0	1.38058	0	1.74758	0
Gria4	0	1.38014	0	1.8835	0
Ubtd2	0	1.37991	0	1.6922	-1.85886
Samd14	0	1.37959	0	1.3079	0
Rftn1	0	1.37953	0	1.59678	-0.694502
Fam198b	0	1.37919	0	1.25972	0
Astn1	0	1.37866	0	2.57999	0
Ngf	0	1.37663	0	1.46006	0
Heph	1.01021	1.37568	0	0.737793	-1.58357
Cep192	0	1.37395	0	1.28899	-0.867419
Pdgfra	0	1.37237	-0.753585	2.17537	0
Gpr176	0	1.3719	0	0	0
Zfp704	0	1.37177	0	1.38509	0
Dpep1	0	1.37136	0	1.40361	0
9130409I23Rik	0	1.37128	0	1.2467	2.32524
Nlrp1b	0	1.37096	0	1.81458	0
Enc1	0	1.37047	0	1.8899	0
Basp1	0	1.36915	0	1.77782	-1.13963
Cd200r1	0	1.36853	0	1.29054	-1.36919
Csdc2	0	1.36853	0	2.17806	0
Prss8	0.679776	1.36822	0	0.862126	0
Mgat4a	0.993521	1.36779	0	0.747663	0
Pck2	0	1.3669	0	1.51467	-1.21329
Endod1	0	1.3654	0	1.27925	0
Casc4	0	1.36529	0	1.10673	-1.33768
Lama5	0	1.36528	0	1.53443	-0.987302
Plk4	0	1.36278	0	1.72273	-2.40694
Acot3	1.59364	1.36275	1.77796	0	0
Ikzf2	0	1.36165	0	1.69791	0
Prss48	0	1.36131	0	1.29858	0
Adcy2	0	1.35933	0	2.28598	0
Mybl2	0	1.35905	0	1.07928	0
Chmp4c	0	1.35787	0	1.16239	-1.40103
Casp4	0	1.35786	0	1.33188	0
Dync2li1	0	1.35766	0	2.16226	0
Vstm4	0	1.35748	0	1.14531	-2.06126
Sybu	0	1.35544	0	2.39984	-3.09298
Sestd1	0	1.35459	0	1.6237	0
Ap1m2	0	1.35455	0	1.52678	0
Acot9	0	1.35422	0	1.65986	0
Tnfrsf19	0.738507	1.35364	0	0.906108	0
Lat2	0	1.3533	0	2.357	0
Pcdh7	0	1.3509	0	1.80342	0
Stxbp5l	0	1.35086	0	1.50234	0
Slamf9	0	1.3498	0	1.85727	0
Oas2	0	1.34826	0	1.68851	0
Paqr4	0	1.34622	0	0.936712	-1.18393
Cyp39a1	0.75831	1.34513	0	0.804938	-2.66085
Pkia	0	1.34463	0	1.43992	-0.978579
Anxa5	0	1.34445	0	1.58978	0
Mtmr11	0	1.34437	0	1.82061	-1.00631
Per1	0.88116	1.34348	0.652295	0.727369	0
Fabp4	1.03489	1.34323	0.979807	0	-1.83743
Frzb	0	1.34256	0	2.03268	-0.66159
Tmem229a	0	1.34161	0	2.13841	0
Tbx2	0	1.34116	0	1.52628	-0.802153
Tcf21	0	1.33957	0	1.42579	-0.880784
Arfgef3	0	1.33956	0	1.47299	0
Ahnak	0	1.33955	0	1.31014	0
A2m	0	1.33909	0	0	0
Npdc1	0	1.33905	0	2.07178	0
Tspan3	0	1.33879	0	1.09027	-1.19051
Art4	0	1.33847	0	1.54264	-0.804828
Fut2	0	1.33787	0	2.45435	0
Gm12353	0	1.33733	0	1.24363	0
Shc4	0	1.33635	0	2.78707	0
Gpm6a	0	1.33618	0	1.25527	0
Wdr66	0	1.33599	0	2.06032	0
Pcdhgb6	0	1.33564	0	1.39515	0
Tsku	0	1.33535	0	1.34058	0.794761
Pola1	0	1.33396	0	0.894881	-0.875234
Gpr153	0	1.33297	0	1.89522	-1.14462
Fos	0	1.33141	0	0.707027	0
Ift57	0	1.33086	0	2.09767	0
Adgrg2	0	1.33083	0	1.78274	0
Zfp791	0	1.33078	0	1.2999	-3.21391
Cd247	0	1.33045	0	1.74936	0
Ptgis	0	1.33037	0	1.31547	0
Serpinb6b	0	1.33014	0	1.589	0
Egr2	0	1.3297	0	2.29241	0
Mrvi1	0	1.3288	0	1.49341	0
Gpr171	0	1.32869	0	2.08047	0
Ulk4	0	1.32865	0	1.54675	0
Klrd1	0	1.32823	0	1.75642	0
Lbh	0	1.32709	0	1.25216	-0.96272
Slc25a24	0	1.32634	0	1.30692	0
Rgs10	0	1.32629	0	1.60259	-0.914035
Cachd1	0	1.32608	0	1.36193	-0.77062
Dkk3	0	1.32268	0	2.08514	0
Gm10639	0	1.32234	0	1.54677	0
Sema3b	0	1.32126	0	1.37455	0
Col22a1	0	1.32052	0	0	0
Hepacam2	0	1.31976	0	0	0
Aldh18a1	0	1.31934	0	1.25944	-1.3858
Hey1	0	1.31921	0	1.34389	-1.18149
Hivep3	0	1.3189	0	1.60872	-1.23101
Robo1	0.64772	1.31794	0	1.00392	0
Lsp1	0	1.31783	0	1.6141	-0.748171
Nrxn2	0	1.31722	0	1.59057	0
Prelid2	0	1.31589	0	1.94506	0
Timp3	0	1.31573	0	1.48292	0
Adam33	0	1.31517	0	1.56911	0
Havcr2	0	1.31515	0	2.27983	0
Pcdhgb5	0	1.31383	0	1.8649	0
Itgb4	0	1.31275	0	1.10258	0
Aff3	0	1.31275	0	1.46244	0
Stc2	0	1.31184	0	2.39078	0
Srpx	0	1.31153	0	1.95995	0
Ptprs	0	1.31147	0	1.35702	-1.36389
Cpz	0	1.31136	0	1.52417	-1.66134
Slc8a1	0	1.31101	0	1.32491	-0.635197
Ccn2	0	1.31063	0	1.66269	0
Cacna2d1	0	1.31054	0	1.77324	-0.68002
Arhgef6	0	1.30995	0	1.36963	-0.73967
Anxa3	0	1.3092	0	1.25754	-0.752725
Fbp2	1.93841	1.30845	0	0	0
Tspan6	0	1.30692	0	1.46795	-2.00751
Mastl	0	1.30617	0	1.09609	-2.43018
Bcam	0	1.30579	0	1.47349	-0.956525
Ints6l	0	1.30399	0	1.06632	-1.10425
Nck2	0	1.3035	0	1.33709	-1.18283
Sirpa	0	1.30345	0	1.41962	-1.14255
Runx1t1	0	1.30344	0	1.99391	0
Mbnl3	0	1.30323	0	1.44189	0
Hmgb2	0	1.30217	0	1.31904	-2.26894
Cavin3	0	1.30198	0	1.11967	-0.990591
H2-Aa	0	1.30058	0	1.67026	0.976555
Ano1	0	1.29983	0	1.69628	0
Fzd3	0	1.29867	0	2.34254	0
Rhoc	0	1.29859	0	1.65734	-1.07477
P2ry10	0	1.29755	0	1.7336	0
Xcr1	0	1.29694	0	1.99289	0
Slc39a5	0	1.29647	0	0	-3.13859
Slc6a8	0	1.29577	0	1.1743	0
Cbx6	0	1.29572	0	1.32627	-1.14122
Hsf2bp	0	1.29401	-1.70948	2.95016	0
Phf11b	0	1.29379	0	1.40736	0
Prrg3	0	1.29312	0	1.2185	-1.61874
Ccl2	0	1.29262	0	1.91042	0
Pdgfrb	0	1.29192	0	1.59716	-0.586284
Ehd2	0	1.29171	0	1.49189	-1.06339
Etnppl	0	1.28835	0	1.46305	0
Nbdy	0	1.28756	0	1.11167	-1.96308
Tead2	0	1.28728	0	1.11912	-2.70297
Serpini1	0	1.28634	0	1.90108	0
Pamr1	0	1.28585	0	1.84676	0
Gsn	0	1.28547	0	1.55765	0
Tnfaip8	0	1.28542	0	1.22618	-0.923338
Ifit2	0	1.28536	0	1.2352	-1.12857
Gldn	0	1.28526	-1.36848	2.71592	0
Car13	0	1.28513	0	1.13319	0
Pstpip1	0	1.2846	0	1.74212	0
Nrm	0	1.28434	0	1.0097	-1.90288
Mx1	0	1.28412	0	1.7751	0
Cacng7	0	1.28398	0	1.58616	0
Dynlt1c	0	1.28371	0	0.882959	0
Kcnip3	0	1.2832	0	1.50462	0
Rap1gap	0	1.28318	0	0.910084	0
Selenon	0	1.28206	0	1.31986	-0.937436
Dtx1	0	1.28107	0	1.71726	0
Itga11	0	1.28095	0	1.84562	0
Mcm2	0	1.28054	0	1.45643	-1.32551
Rap1gap2	0	1.28036	0	1.08007	-1.91873
Slfn8	0	1.28003	0	1.52039	0
Capg	0	1.279	0	1.82906	0
Ccdc88a	0	1.27892	0	1.31532	-1.3658
Thsd7a	0	1.2783	0	2.0076	0
Arl11	0	1.27729	0	1.61837	0
Pde10a	0	1.27716	-1.81919	3.0512	0
Btc	0	1.27605	0	1.67165	0
Icosl	0	1.27542	0	1.49795	-1.14617
Kif7	0	1.27541	0	0.937055	0
Adgrl1	0	1.27538	0	1.15015	-1.0278
Tnf	0	1.27467	0	1.37884	0
Ifi44	0	1.27352	0	1.62091	0
Spon1	0	1.27333	0	1.77804	-0.727073
Ms4a4b	0	1.27326	0	1.67213	-1.0486
Sema3c	0	1.27171	0	1.68281	-0.732416
Otulinl	0	1.27134	0	1.38247	-0.950067
Hif3a	0	1.27133	0	1.61954	0
Map2	0	1.27081	0	1.49442	-0.963282
Ccne2	0	1.27053	0	0	-1.98437
Slc41a3	0	1.26927	0	1.68093	-0.800143
Gdf10	0	1.2682	0	1.84926	-0.996606
Itpripl2	0	1.26757	0	1.38559	-0.620912
B4galt6	0	1.26746	0	1.3848	0
Spaca6	0	1.26714	0	1.16988	-0.934897
Hexb	0	1.267	0	1.24391	-1.02829
Eid2	0	1.26563	0	1.92169	0
Tll1	0	1.26508	0	0	0
Cenpm	0	1.26502	0	0.994842	-2.72635
Pf4	0	1.26495	0	0.851586	-1.56157
Arhgap27	0	1.26358	0	1.41305	-0.694254
Angptl2	0	1.26292	0	1.06276	0
Serpinh1	0	1.26262	0	1.32708	-1.47413
Rgs14	0	1.26189	0	1.58311	0
Klhl29	0	1.26149	0	1.51705	0
Tead1	0	1.26105	0	1.59672	0
Oxct1	0	1.26093	0	0.98728	-0.78015
Plau	0	1.26032	0	1.4578	-1.25833
Zc3h12b	0	1.25988	0	1.54637	0
Bcl2	0	1.25978	0	1.43067	-0.62837
Tnfrsf18	0	1.25955	0	0.943712	0
Bcl11a	0	1.25926	0	1.4171	0
Tuba1b	0	1.25862	0	0.959162	-1.36821
Nckap5l	0	1.25745	0	1.51816	-1.30868
Ckb	0.739244	1.2571	0	0.626365	-1.17625
B4galt5	0	1.25675	0	1.20515	0
Ecm2	0	1.25655	0	1.26159	-0.839041
Emid1	0	1.25622	0	0	0
Fbxo5	0	1.2559	0	0.780602	-1.72739
Chaf1b	0	1.2545	0	1.59039	-1.91341
Morc4	0	1.25409	0	0.634567	-2.16118
Wdfy4	0	1.25397	0	1.40493	-0.722569
Lamb1	0	1.25387	0	1.12839	-0.797347
Spire1	0	1.2538	0	1.364	-1.12707
Smim3	0	1.25378	0	1.51275	-1.065
Psme2b	0	1.25333	0	1.2648	-0.896206
Zfr2	0	1.25326	0	1.51967	0
Plp2	0	1.25303	0	1.27779	-0.874355
H2-Eb1	0	1.25273	0	1.63697	0.826405
Clec5a	0	1.25226	0	2.71633	0
Cyp3a59	0.631554	1.25163	0	0.747763	-2.55037
Cybb	0	1.2516	0	1.37421	0
Pcdh9	0	1.2513	0	1.7249	0
Ttn	1.9469	1.25052	2.35824	-1.29949	0
Ap1s2	0	1.25044	0	1.26177	0
Cenpk	0	1.24972	0	0.913722	-1.56828
Ccdc114	0	1.24941	0	1.97335	0
Lrmda	0	1.24935	0	1.38137	0
Prr36	0	1.24892	0	0.949058	0
Acss1	0	1.24844	0	0.901355	0
Pam	0	1.24802	0	1.12551	-0.980798
Stk39	0	1.24782	0	1.39465	-0.60036
Hist1h1d	0	1.24543	0	1.10491	0
Zc2hc1a	0	1.24419	0	1.33252	-1.59702
Nlgn2	0	1.24274	0	1.38809	-0.6352
Gpr65	0	1.24231	0	1.18587	0
Lysmd2	0	1.24137	-2.08819	3.33737	-1.2539
Nr4a1	0	1.24115	0	1.82186	0
Crispld2	0	1.23932	-1.46998	2.71963	0
Arhgap19	0	1.23918	0	1.28171	-1.25524
Mbp	0	1.23871	0	1.63295	0
Postn	0	1.23769	0	0.873496	-2.23705
Fgd3	0	1.23738	0	1.47745	0
Ciita	0	1.23727	0	1.53212	0
Cux2	0	1.23701	0	1.20965	-4.56902
Pik3ip1	0	1.23648	0	1.73243	0
Gnai1	0	1.23586	0	1.62332	0.798141
Galnt12	0	1.23566	0	1.78258	0
Gfra2	0	1.23551	0	1.70604	-1.96989
Sfxn3	0	1.23546	0	1.46152	0
Ebf1	0	1.2352	0	0.922939	0
Acot6	0	1.23498	0	1.76698	-1.07647
Ncoa7	0	1.23478	0	1.35682	-1.24732
Pcdhb20	0	1.23468	0	0	0
Gpsm1	0	1.23435	0	1.55138	-0.755593
Lekr1	0	1.23379	0	0	0
Lynx1	0	1.23378	0	1.82005	0
Slc20a1	0	1.23366	0	0.916954	0
Atad2	0	1.23322	0	1.21587	-1.40537
Ska2	0	1.23002	0	1.15529	-1.40438
Blnk	0	1.22924	0	1.78992	1.80763
Wee1	1.17326	1.22844	1.14542	0	0
Adcy7	0	1.22815	0	1.43354	-0.793376
Eid1	0	1.22785	0	1.179	-0.941827
Mapk7	0	1.22729	0	1.3733	-0.647843
St8sia4	0	1.2245	0	1.40679	-0.61548
Nexn	0	1.22397	0	1.20508	0
Ly6a	0	1.22395	0	1.60527	0.709706
Sulf2	0	1.22353	0	1.38553	0
Hcst	0	1.22216	0	0	0
Evc2	0	1.22197	0	1.62616	0
Large2	0	1.22178	0	1.37205	0
Pln	0	1.22129	0	0	0
Gabrb3	0	1.2212	0	2.06068	0
Msantd3	0	1.22107	0	1.42031	-3.06679
Ms4a4c	0	1.22104	0	1.76234	0
Fam102b	0	1.22079	0	0.864186	-1.03794
Iqgap1	0	1.21978	0	1.23944	-0.874608
Cdh23	0	1.21901	0	0	0
Gm14412	0	1.21894	0	1.59562	0
Tceal8	0	1.21846	0	1.12776	-1.98124
Lgals3	0	1.21733	0	1.51242	0
Cd93	0	1.21671	0	1.11867	-1.42503
Hist1h2bg	0	1.21597	0	1.16192	0
Boc	0	1.21596	0	2.15102	0
Igfbp3	0	1.21522	0	1.1779	-1.92588
Zdhhc2	0	1.21517	0	1.64885	-1.04057
Tnfaip3	0	1.21483	0	1.58347	-0.631937
Rundc3b	0	1.2147	0	1.3842	0
Ltb	0	1.21295	0	1.41952	-0.720963
Fgl2	0	1.2126	0	1.57393	0
Cd28	0	1.21225	0	0	0
Pygm	0	1.21168	0	0.694358	-0.766542
Elf4	0	1.2114	0	1.22256	-0.920337
Krtcap3	0	1.21117	0	0	0
Col12a1	0	1.21106	-1.0571	2.35945	0
Rnf150	0	1.2109	0	1.42567	0
Fmnl1	0	1.21065	0	1.38358	-0.618202
H2-Ab1	0	1.20964	0	1.60563	0.753599
Kcnq1	0	1.20958	0	1.05932	-0.705301
Exoc3l4	1.09454	1.20957	0	0	-0.986733
Dab1	0	1.20928	0	1.54762	0
Cd74	0	1.20908	0	1.60526	0.795169
Lrrc49	0	1.20795	0	1.73951	0
Slc1a4	0	1.20704	0	1.4384	-2.02384
Gsta4	0	1.20667	0	1.24509	0
Ipcef1	0	1.20623	0	1.84378	0
Tlr1	0	1.2045	0	1.32642	0
Adamts15	0	1.20419	0	2.16815	0
BC055324	0	1.20417	0	1.28177	-2.27471
Arhgap25	0	1.20379	0	1.29875	-0.753762
Smc4	0	1.2032	0	1.19727	-1.62267
Ltbp1	0	1.20216	-0.674364	1.89149	0
Hvcn1	0	1.20182	0	1.57845	0
Rin1	0	1.20031	0	1.31397	0
Tlr11	0	1.20027	0	1.14752	0
Fam110b	0	1.20026	0	1.38959	0
Lamc1	0	1.19935	0	1.0301	-1.59491
Plaur	0	1.19911	0	1.74345	0
Grin2d	0	1.1981	0	0.975534	0
Slc2a13	0	1.198	0	1.09694	-2.12551
Ly6c2	0	1.19633	0	1.67513	0
Arhgap15	0	1.19627	0	1.57076	0
Ezr	0.609456	1.19599	0	0.897408	-0.66237
Gramd1b	0	1.19553	0	1.1969	-0.638174
Ptpn14	0	1.19474	0	1.50469	0
Tlr13	0	1.19328	0	1.72981	0
Nav1	0	1.19326	0	1.46022	-0.649095
Kirrel	0	1.19291	0	1.78962	-0.671542
Cdk14	0	1.19237	0	1.37441	-0.946698
Adam32	0	1.19205	0	2.89823	0
Spsb1	0	1.19197	0	1.57883	0
D630003M21Rik	0	1.19183	0	1.26688	-1.98111
L1cam	0	1.19134	0	0	0
Efemp2	0	1.19119	0	1.24114	-1.10009
Rbms3	0	1.1911	0	1.34583	0
Tuba8	0	1.19104	-1.37648	2.60548	0
Dhrs9	0	1.19076	-1.07328	2.27563	1.16479
Ifi203	0	1.19041	0	1.23659	0
Rsad2	0	1.18963	0	1.59628	-0.886609
Phf24	0	1.1896	0	0	0
Tes	0	1.18916	0	1.59376	0
Pde1c	0	1.18792	0	1.25059	0
Ap1s3	0	1.18786	0	1.04357	-1.39565
Grap2	0	1.18631	0	1.42345	0
Ctrl	2.22072	1.18603	2.53522	-1.15783	0
Rasa4	0	1.18588	0	1.30512	0
Abca5	0	1.18553	0	1.71698	0
Csrp1	0	1.18531	0	1.33173	-1.42068
Rrm1	0	1.18501	0	1.10931	-1.61854
Col14a1	0	1.18495	0	0.995708	-0.81427
Lpcat2	0	1.18438	0	1.38822	0
Ikbip	0	1.1837	0	1.33807	-0.837834
AA986860	0	1.18367	0	1.70688	0
Tnfrsf13b	0	1.18203	0	1.51734	0
Cd14	0	1.18189	0	0.797729	0
Sntg1	0	1.1813	0	1.75998	0
Dmtn	0	1.17994	0	0.947468	0
Trim47	0	1.17946	0	1.3722	0
Glis2	0	1.17935	0	1.61757	0
Ache	0	1.17911	0	1.46173	0
Fam196a	0	1.17754	0	1.06926	0
Cbr1	0	1.17747	0	1.06539	-1.26399
Dnah2	0	1.17728	0	1.38634	0
Map1a	0	1.17701	0	1.60813	0
Ccr7	0	1.17645	0	1.88543	0
Kcnn3	0	1.17638	0	2.1316	0
Fam196b	0	1.17577	0	1.72166	0
Relb	0	1.17507	0	1.64361	0
Lax1	0	1.17493	0	1.07908	0
Lrtm2	0	1.17291	-1.08069	2.06439	0
Tlr7	0	1.17156	0	1.36531	0
Angpt2	0	1.17126	0	1.05887	-0.654422
Gls	0	1.17124	0	0.931257	-1.05795
Jazf1	0	1.17086	0	1.48848	-1.01001
Pcdhga8	0	1.17003	0	0	0
Clip2	0	1.16981	0	1.55243	0
Sema3g	0	1.16925	-1.90787	2.83446	0
Gfpt2	0	1.16916	0	2.27993	0
Akap6	0	1.16792	0	1.33426	0
Atp8b2	0	1.16718	0	1.41674	-1.27858
Ihh	0	1.16683	0	0	-0.70536
Traip	0	1.16578	0	1.9975	-2.75548
Inpp5d	0	1.16574	0	1.17795	-0.601378
Nrxn1	0	1.16559	0	1.21261	0
Mamdc2	0	1.16525	0	0.959355	-0.608455
Mpp1	0.642099	1.16461	0	0.771408	-1.1389
Mical1	0	1.16427	0	1.29422	0
Maml2	0	1.16419	0	1.0416	-0.58552
Smtn	0	1.16278	0	1.13472	-1.2038
Tceal9	0	1.16227	0	1.24011	-1.30735
Krt7	0	1.1622	0	2.09638	0
Igsf1	0	1.16193	0	0	0
Gng2	0	1.16182	0	1.17704	-0.768644
Synpo	0	1.16124	0	1.64952	0
Eya4	0	1.16123	0	1.74208	0
Gdf11	0	1.16075	0	0.93544	0
Ttc12	0	1.16056	0	1.69386	0
Dtx3	0	1.16004	0	1.42554	-0.634723
Slc7a1	0	1.15767	0	1.86273	-1.10313
Ajuba	0	1.15766	0	1.61964	0
Arhgef16	0	1.15721	0	0.812913	0
Nptx1	0	1.1571	0	0	0
Cfap54	0	1.15605	0	1.41164	0
Arhgap28	0	1.15595	0	1.32589	0
Srpx2	0	1.15509	0	1.2912	0
Cd180	0	1.15505	0	1.22668	-0.669903
Lilrb4a	0	1.15268	0	1.24028	0
Plcd3	0	1.15192	0	1.97957	0
P2ry6	0	1.15076	0	1.42443	-0.633689
Tmem119	0	1.1502	-1.23403	2.38157	0
Adamts3	0	1.15007	0	1.61641	0
Tgtp2	0	1.14968	0	0.717402	0
Spry1	0	1.14847	0	1.19879	-0.765611
Grhl1	0	1.14814	-0.980528	2.17219	-1.50532
Sema7a	0	1.14719	0	1.79799	0
Ccdc88c	0	1.14609	0	1.06899	-0.776432
Fgf12	0	1.14583	0	1.79357	0
Nsl1	0	1.14518	0	1.34279	-3.11633
Sh3bgrl3	0	1.14484	0	1.44932	0
Adam15	0	1.14266	0	0.99923	-0.780716
Irf4	0	1.14229	0	1.04819	0
Gdf6	0	1.14228	0	1.83738	0
Hdgfl3	0	1.14134	0	1.43253	-0.766901
Ogn	0	1.14123	0	1.40254	0
Gcsam	0	1.14094	0	2.03146	0
Trps1	0	1.14082	0	1.58939	-0.586312
Nes	0	1.14036	0	0.998875	-1.59179
Palb2	0	1.13977	0	1.13356	-1.53757
B3gnt9	0	1.1394	0	1.01828	0
Sh2d4a	0	1.13918	0	0.657267	-1.51587
Cavin1	0	1.13821	0	1.12162	-0.953187
Fcrla	0	1.1378	0	1.11829	0
Adam4	0	1.13778	0	1.22528	0
Ankrd13b	0	1.13761	0	0.978635	-0.942071
Psd4	0	1.13741	0	1.21249	-0.792483
Stard6	0	1.13688	0	0	0
Trim36	0	1.13603	0	1.0596	0
Haus8	0	1.136	0	1.41198	0
C2cd4c	0	1.136	0	2.9886	0
Ctnnd2	0	1.1358	0	1.80247	0
Tmc4	0	1.13324	0	0.731382	0
E2f7	0	1.13265	0	1.19038	-1.29912
Rasgef1b	0	1.13188	0	1.51321	0
Srxn1	0	1.13001	0	1.56967	0
Gpr141	0	1.12942	0	2.11985	0
Nalcn	0	1.12902	0	2.62036	0
Inpp4b	0	1.12895	0	1.36742	-0.949052
Kcnab2	0	1.12891	0	1.44156	0
Dock10	0	1.12833	0	1.16344	-0.677501
Fhl3	0	1.12816	0	1.03891	0
Aim2	0	1.12802	0	0.964229	-2.10125
Evpl	0	1.12794	0	1.47377	0
Kctd17	0	1.12786	0	1.66299	0
Nfatc4	0	1.12729	0	1.71145	0
Itk	0	1.12673	0	1.43195	0
Zc3hav1l	0	1.12649	0	1.60261	0
Adamts6	0	1.12631	0	0	-1.61179
Crip1	0.91622	1.12566	0.967979	0	-0.793819
Kcne4	0	1.12468	0	1.37835	0
Ms4a6b	0	1.12447	0	1.2566	-0.656089
Cd22	0	1.1244	0	1.14798	-0.606186
Gpr161	0	1.12305	0	0.990269	0
Rbp1	0	1.12302	0	1.20488	-1.68977
Prkab2	0	1.12251	0	1.38138	0
Sgcd	0	1.1215	0	1.62884	0
Maged2	0	1.12125	0	1.12139	-1.14999
Fam131a	0	1.12122	0	0.92925	0
Slc25a36	0	1.12115	0	0.943804	-0.712651
Ggt7	0	1.12073	0	2.13985	0
Asb4	0	1.12068	0	1.57916	0
Pde1a	0	1.12048	0	1.1312	0
Nradd	0	1.12021	0	0.982161	0
Foxred2	0	1.12001	0	1.14434	0
Zfp599	0	1.11978	0	1.39536	0
Pak3	0	1.11937	0	2.12234	0
Pdgfb	0	1.11861	0	1.65171	0
Tbc1d9	0	1.1183	0	1.31501	0
Anxa9	0	1.11812	0	1.68928	0
Dbn1	0	1.11765	0	1.42602	-1.49854
Srl	0	1.11666	0	0	-1.46267
Specc1	0	1.11611	0	1.18965	-1.7135
Wt1	0	1.11577	0	1.90396	0
Plek2	0	1.11464	0	1.86214	-2.47244
Tm4sf4	0	1.11449	0	1.50072	0
Wdr62	0	1.11364	0	0.869243	-0.754034
Ly9	0	1.1136	0	1.49607	0
Daam2	0	1.11354	0	1.43804	-0.702776
Nupr1	0	1.11266	0	0.799412	-1.28522
Gabra3	0	1.11208	0	1.44393	0
Gucy1a1	0	1.11149	0	0.939481	-1.26062
Nptxr	0	1.11048	0	1.33889	0
Naalad2	0	1.10994	0	0.977969	-0.726592
Spaar	0	1.10967	0	1.49802	0
Il2rg	0	1.10967	0	0.877981	-1.11184
Tmprss7	0	1.10944	0	2.17758	0
Cdkl3	0	1.10915	0	1.06944	0
Hhipl2	0	1.10876	0	1.72795	0
Sorl1	0	1.10875	0	1.31292	0
Rab11fip5	0	1.10807	0	1.37863	-0.810829
Gpc6	0	1.1077	0	1.15292	-1.88389
Sla	0	1.10684	0	1.32517	-0.747216
Sacs	0	1.10681	0	1.36357	0
Etl4	0	1.10681	0	1.11091	0
BC052040	0	1.10642	0	0.774244	0
Plcxd3	0	1.10617	0	2.37433	0
Slc16a7	0.639329	1.10545	0	0.672983	-0.867083
Rasl10b	0	1.10527	0	0	0
Rbbp8	0	1.10507	0	1.18271	0
Cstb	0	1.10366	0	1.02642	0
Slpi	0	1.10346	-1.60261	2.64003	0
Thbs3	0	1.10307	0	1.51647	0
H2afx	0	1.10232	0	0.973875	0
Nrip2	0	1.10202	0	1.025	0
Ophn1	0	1.10072	0	1.01409	-1.17325
Nkg7	0	1.10069	0	1.50014	0
Trib2	0	1.10031	0	0.942167	-0.963438
Gadd45b	0	1.09971	0	1.15408	-1.85615
Plet1	0	1.09971	0	1.18434	0
Rab8b	0	1.0988	0	1.12156	-0.948689
Nt5dc2	0	1.09865	0	0.855458	-1.02284
Cyp4f16	0	1.09863	0	1.44838	-1.337
Anks6	0	1.09853	0	1.12066	0
Cryl1	0	1.09845	0	0.882108	0.613139
Ptpn22	0	1.09766	0	1.2339	-0.742645
Mtus2	0	1.09731	0	1.28097	0
Gabbr1	0	1.09713	0	1.5245	-0.891788
Prag1	0	1.09673	0	1.00863	-1.29125
Gtdc1	0	1.09594	0	1.3529	0
Ptpro	0	1.09585	0	1.31604	0
Mgst3	0	1.09564	0	0.650069	0
Kif21b	0	1.09542	0	0.971452	-0.916498
Ntrk2	0	1.09518	-0.697993	1.83186	0
Gpx8	0	1.09469	0	1.50036	-0.764522
Fam72a	0	1.09441	0	1.0428	0
Tspoap1	0	1.09425	0	1.36605	0
Mcm4	0	1.0939	0	0.833259	-1.12163
Cytip	0	1.09386	0	1.41337	0
Sirpb1c	0	1.09231	0	2.50026	0
Ptgr1	0	1.09227	0	0.969724	-1.36012
Prrg1	0	1.09193	0	0.924234	-1.66254
Sgk1	0	1.09181	-1.04246	2.16338	-1.01491
Tmem43	0	1.09097	0	1.42168	0
P3h2	0	1.09011	0	1.73414	0
Ly6c1	0	1.08963	0	2.32984	0
Zfp61	0	1.08945	0	0	0
Tulp3	0	1.08866	0	1.76029	-0.921697
C3ar1	0	1.08804	0	1.54856	0
Pkm	0.636903	1.08782	0	0.605799	-1.11041
Trpm4	0	1.08764	0	0.741716	-2.25176
Flna	0	1.08751	0	1.09226	-1.02801
Tut4	0	1.08679	0	0.939781	-1.05536
Gm5431	0	1.08618	0	0.962524	-0.687528
Gna15	0	1.08611	0	1.49731	0
Kcnj2	0	1.08601	0	1.29977	0
Jpt1	0	1.08489	0	1.00592	-0.872025
Pde4d	0	1.08361	0	1.56159	0
Lamb2	0	1.08347	0	1.04503	-0.790326
Lmod1	0	1.08329	0	1.07739	0
Slc7a15	0	1.08329	0	0.821088	0
Ifi209	0	1.08316	0	1.23347	-0.946962
Nkd2	0	1.08269	0	0	0
Rcn3	0	1.08247	0	1.11993	-1.14834
Bag2	0	1.08185	0	0.813978	0
Gm20696	0	1.08141	0	0	0
Mast1	0	1.08039	0	1.51114	0
Aoah	0	1.07831	0	1.39551	-0.689589
Ttyh1	0	1.07762	-1.05634	2.18265	0
Rhbdf1	0	1.07695	0	1.38896	0
Lrrcc1	0	1.07653	0	1.24394	0
Tgfb1i1	0	1.07646	0	1.4569	-1.17997
2025-03-09	0	1.0762	0	1.48782	0
Plekhm3	0	1.07595	0	1.45348	0
Mmp23	0	1.0759	0	1.39208	-0.634858
Trim30a	0	1.07472	0	1.04085	-0.742302
Apc2	0	1.07458	0	1.03644	0
Vsig10l	0	1.07398	0	1.15826	0
Wls	0	1.07368	0	1.07921	-0.835503
Dop1b	0	1.07364	0	1.10001	0.693872
Gm13889	0	1.07358	0	1.86698	-0.826979
Tnfrsf23	0	1.07209	0	0.948149	0
Rtn2	0	1.07071	0	1.37379	0
Tbc1d19	0	1.07012	0	1.36848	0
Slc16a5	0	1.0698	0	1.76986	-1.56256
Ankrd6	0	1.06956	0	1.75231	0
Cenpa	0	1.06857	0	1.2417	-2.28356
Adcy8	0	1.06839	0	3.91531	0
Itgb2l	0	1.06829	0	0	0
Slc7a6	0	1.06803	0	1.55452	0
Ccdc102a	0	1.06788	0	1.11387	-1.15922
Numbl	0	1.06759	0	1.59251	-1.10664
Gzmb	0	1.06736	0	1.24611	-1.86893
Loxl3	0	1.06679	0	1.33195	-0.663129
Ptpn7	0	1.06664	0	1.2948	0
Traf3ip3	0	1.06655	0	1.44935	0
Armcx2	0	1.06531	0	1.02483	-1.20157
Cc2d2a	0	1.06473	0	1.02169	-1.40228
Ephx1	0	1.06468	0	1.12572	0.874837
Pxdn	0	1.0644	0	0.976294	-2.19324
Tnxb	0	1.06385	0	1.10145	0
Emb	0	1.06285	0	1.68911	0
Rad18	0	1.0612	0	1.45596	-1.47999
Map3k12	0	1.0609	0	0.908494	-0.965084
Adamts14	0	1.06016	0	1.17635	-1.53482
Btbd8	0	1.06003	0	0.867254	0
Phldb1	0	1.05953	0	1.10884	-0.948365
Cryab	0	1.05935	0	0.797674	0
Evl	0	1.05888	0	1.08587	-1.11369
Apbb1ip	0	1.05886	0	1.21583	-1.01308
Susd2	0	1.05871	0	1.30142	0
Arl4c	0	1.0583	0	1.17961	-1.02623
Myo1g	0	1.05801	0	1.1693	-0.959773
Ccr1	0	1.05743	0	1.72173	0
Spata6	0	1.05741	0	1.18601	-1.06078
Rnf32	0	1.05682	0	0.920848	0
Ppm1h	0	1.05661	0	1.22915	0
Prkar2b	0	1.05643	0	0.888248	-1.15398
Plekha4	0	1.05552	0	1.40504	0
Ifi207	0	1.05516	0	1.16997	0
Nectin4	0	1.05491	0	2.01456	0
Zfp641	0	1.05356	0	1.45256	0
Nedd9	0	1.05251	0	1.21645	-0.823956
Klhl13	0	1.0524	0	0.675317	-1.74751
C7	0	1.05228	0	1.93795	0
Cntln	0	1.05202	0	1.00855	-1.78575
Col16a1	0	1.05197	0	1.24479	-1.20185
Usp18	0	1.05148	0	1.26783	-0.654556
Far2	0	1.05061	0	0	0
Ephb3	0	1.05005	0	1.14756	0
Cd52	0	1.04985	0	1.16852	0
Rgs2	0	1.0498	-0.726083	1.87889	0
Zfp984	0	1.0496	0	0.980026	0
Limch1	0	1.04864	0	1.3819	-1.00153
Tfrc	0	1.04825	0	0.733449	-1.68241
Cers5	0	1.04742	0	0.912439	-0.786216
Fgf2	0	1.04694	0	0.949808	0
Cplx2	0	1.04531	0	1.18347	-1.48837
Abr	0	1.04478	0	1.24322	0
Shisa3	0	1.04453	0	1.66144	0
Gm6377	0	1.04352	0	1.01148	-0.595661
Ier3	0	1.04256	0	1.39171	-0.732058
Foxs1	0	1.04251	0	2.00309	0
S100a6	0	1.04111	0	1.18241	-0.623286
P3h3	0	1.03961	0	1.56515	-0.827104
Trpv4	0	1.03885	0	1.36752	0
Cxcl16	0	1.03861	0	1.18658	0
Cerk	0	1.0368	0	1.07394	-1.63521
Ugt1a7c	1.17236	1.03679	1.1943	0	0
Mndal	0	1.03679	0	1.05738	-0.794012
Slc35f2	0	1.03608	0	1.3933	0
Coro2a	0	1.03533	0	0.784865	-0.889821
Zfpm2	0	1.0353	0	1.59866	-1.05355
Ypel4	0	1.0353	0	1.48028	0
Sh3bp4	0	1.03509	0	1.4927	0
Rhoh	0	1.03502	0	1.31008	0
Micall2	0	1.0343	0	0.793944	-1.17115
Trim35	0	1.03252	0	1.08127	-1.07655
Ddr2	0	1.03105	0	1.33014	0
Creb3l1	0	1.03105	0	1.36174	-0.967036
Gpr183	0	1.03065	0	1.3635	0
Adgb	0	1.03038	0	1.30161	0
Tspan15	0	1.02935	0	0.793522	-1.69541
Thy1	0	1.02919	0	1.19149	-0.650885
Mvb12b	0	1.029	0	1.24228	-0.965863
Flvcr2	0	1.02865	0	0.932944	-2.07524
Pitpnm1	0	1.02828	0	1.03321	0
Mxra8	0	1.02818	0	1.16171	-0.65545
Rab31	0	1.02814	0	1.0924	-1.02591
Gcnt1	0	1.02794	0	1.56229	0
Miga1	0	1.02768	0	1.29114	-0.657022
Il1rn	0	1.02679	0	1.24337	0
Arrdc1	0	1.02643	0	0.932472	0
Zgrf1	0	1.02632	0	1.57985	-1.76692
Ifit3b	0	1.02602	0	1.0115	0
Parvg	0	1.02596	0	1.37114	-1.12407
Jdp2	0	1.02577	0	1.33261	0
Mob3a	0	1.02538	0	1.02327	0
Il1rl2	0	1.025	0	1.30794	0
Clstn1	0	1.02465	0	0.99304	-0.715463
H2afy2	0	1.02454	0	1.33759	0
Galnt6	0	1.02367	0	0	-0.985138
Lacc1	0	1.02365	0	1.07718	-1.01127
Tmem237	0	1.0236	0	1.3113	0
Mrgpre	0	1.02291	0	0.976063	-0.642563
Atp6v0d2	0	1.02276	0	0.94603	-2.43255
Prdm1	0	1.0223	0	1.3634	0
Rgs19	0	1.02226	0	0.982951	-0.927478
Fancb	0	1.02203	0	1.02159	-1.53299
Prkar1b	0	1.02158	0	1.98817	0
Col6a5	0	1.02119	0	1.78318	0
Hist1h3e	0	1.02094	0	0.814911	0
Spon2	0	1.02052	0	1.24425	0
Eml1	0	1.02002	0	1.45889	-0.931013
Il10ra	0	1.01958	0	1.0349	0
Chst12	0	1.01908	0	0.777139	-0.89125
Gpc1	0	1.01861	0	1.23744	2.86531
Itga4	0	1.01789	0	1.10584	-0.749079
Cyp2c39	0	1.01788	0	0	-1.75339
Ptpru	0	1.01785	0	1.12253	0
Usp11	0	1.01762	0	1.46984	0
Sftpd	0	1.01753	0	1.62276	0
Adcy3	0	1.0172	0	1.33792	-0.662741
Kbtbd11	0	1.01693	0	0.833454	-0.758116
Slc16a4	0	1.01622	0	0.903247	0
Mef2c	0	1.01558	0	1.0332	-0.770195
Zfp385a	0	1.01495	0	0.763379	-1.69501
Vcpkmt	0	1.01483	0	1.0016	-1.25553
Plekha2	0	1.01468	0	0.949263	-0.968188
Sftpa1	0	1.01404	0	1.13444	0
Adamts10	0	1.0138	0	1.00496	-1.15321
Tlr9	0	1.01321	0	1.41411	0
Gab2	0	1.01317	0	1.07842	-0.626077
Gen1	0	1.01285	0	1.09702	-1.35158
Htra3	0	1.01225	-1.20835	2.21175	0
Marcks	0	1.01208	0	0.933141	-1.10065
Map1b	0	1.01175	0	1.15101	0
Tm6sf1	0	1.01138	0	1.29647	-1.03983
Pdk3	0	1.01037	0	1.36202	-1.44586
Irf8	0	1.00901	0	1.22652	-0.827134
Mark1	0	1.00886	0	1.27016	-0.979919
Anxa1	0	1.00861	0	1.03806	-0.593405
A930033H14Rik	0	1.00747	0	0	0
Dusp8	0	1.00634	-1.43843	2.49657	0
Lxn	0	1.00497	0	1.10137	-1.05884
Zfp462	0	1.00453	0	1.57907	-0.95123
Adgrg6	0	1.00266	0	1.15633	0
Samsn1	0	1.00243	0	1.21878	0
Cd44	0	1.00204	0	1.00965	0
Tgtp1	0	1.00195	0	1.1184	-0.891781
Syngap1	0	1.00139	0	1.65501	0
St6galnac2	0	1.00136	0	0.97683	0
Ano6	0	1.00132	0	1.09458	-0.742656
Zfp28	0	1.00075	0	0.936833	0
Cdkn2c	0	0.997702	0	1.31718	-1.59103
Zfp14	0	0.996765	0	0.899139	0
Arhgef17	0	0.996459	0	1.34753	-0.79467
Nipal1	0	0.995868	0	1.06165	-2.60472
Sp100	0	0.99527	0	1.05826	-0.841238
Dapp1	0	0.995058	0	0.975083	-0.873975
Platr25	0	0.994812	0	1.0408	-1.05742
Tmem98	0	0.994255	0	0.946464	0
Hbegf	0	0.994214	0	1.26474	0
Atp8a2	0	0.994197	0	0.899161	0
Slc25a27	0	0.993179	0	1.43355	-0.899897
Lpar2	0	0.992631	0	0	0
Rubcnl	0	0.992366	0	1.18069	0
Tm4sf1	0	0.990568	0	0.926865	0
Podn	0	0.990474	0	1.39051	0
Nol4l	0	0.990369	0	0.956322	-1.04046
Apaf1	0	0.989929	0	0.992942	-1.08993
Rcan3	0	0.989906	0	1.12563	-1.50271
Pcolce	0	0.989634	0	1.00031	-1.15529
Tpm1	0	0.989183	0	1.10605	-0.679892
Samd9l	0	0.988908	0	1.15378	0
Igsf10	0	0.988295	0	1.40671	-0.858711
Sik1	0	0.98802	0	1.44627	0
Slco1a4	0.706758	0.987587	0.593454	0	-2.18259
Vash1	0	0.987086	0	0	-2.12877
Sdk2	0	0.986515	0	1.58941	0
Acta2	0	0.985941	0	0	-1.63361
Chst14	0	0.985542	0	0.845078	-1.00693
Cnn2	0	0.985108	0	0.83134	-1.11441
Fam84b	0	0.984902	0	0.860342	0
Tox2	0	0.983567	0	2.34261	0
Rtn4	0	0.983017	0	0.811085	-0.776091
Eda	0	0.982952	0	0	0
Gbp9	0	0.9825	0	0.905661	-1.03749
Slc24a3	0	0.982458	0	1.16178	0
Scn1b	0	0.982325	0	1.02715	0
Megf11	0	0.982049	0	1.08172	0
Mllt3	0	0.981739	0	0.631865	-0.993512
Cdh18	0	0.981518	0	0.711833	0
Cd48	0	0.981081	0	1.00472	0
Htatip2	0	0.981029	0	1.26636	0
Pkib	0	0.98099	0	1.91022	0
Rnf122	0	0.980565	0	1.53646	-1.2566
Mcm3	0	0.979918	0	0.833688	-1.67128
Lilr4b	0	0.979326	0	1.2918	0
Abcc1	0	0.979289	0	1.12114	0
Nipa1	0	0.978449	0	1.18084	-1.47054
Padi2	0	0.978392	0	1.36355	0
Cyba	0	0.97811	0	0.963592	-1.03373
Man1c1	0	0.977071	0	1.07642	-0.961912
Pgm2	0	0.977062	0	1.00102	-1.02918
Dnah8	0	0.976728	0	0	0
BC034090	0	0.976592	0	1.95785	0
Cpeb1	0	0.976466	0	0.872929	1.40812
Map3k14	0	0.975737	0	1.33298	0
Filip1l	0	0.975483	0	0.954086	-0.847569
Ucp2	0	0.974242	0	0.961791	0
Adrb2	0	0.97419	0	0.945149	-1.72897
Iqcg	0	0.974103	0	0	-1.09031
Milr1	0	0.973222	0	1.43269	-0.951609
Erbb2	0	0.972877	0	0.70696	-1.10952
Ckap4	0	0.97274	0	1.32339	-1.63938
Rph3al	0	0.972207	0	1.04338	0
Fam111a	0	0.972078	0	0.835389	-1.34818
Idh2	0	0.970871	0	0.829785	-1.11629
Igf1r	0	0.96965	0	1.22022	-0.911961
Aqp4	0	0.969094	0	0	0
Hand2	0	0.968876	0	1.11561	-0.750544
Ptafr	0	0.967996	0	1.21404	0
Wipf1	0	0.967924	0	1.09312	-0.690688
Tiam1	0	0.967722	0	0.981673	0
Pvr	0	0.967326	0	1.14011	0
Myadm	0	0.964684	0	1.05324	-0.915004
Pdlim2	0	0.963594	0	1.28058	-1.10289
Ttc39a	0	0.962906	-0.942274	1.84429	-0.937033
Ugdh	0	0.96285	0	1.29802	1.77943
Atpif1	0	0.962196	0	0.745106	-1.1532
Fry	0	0.962195	0	1.46149	-1.05049
Dcn	0	0.960898	0	0.937378	0
Ednrb	0	0.959887	0	0.893463	-0.680877
Mapk8ip1	0	0.959173	0	1.30017	-0.737649
Akr1b10	0	0.958567	0	0	-0.849311
Stk10	0	0.958076	0	1.00923	-0.753971
Hmcn1	0	0.957916	0	0.883988	-2.18292
Trp53inp1	0	0.957291	0	1.1555	0
Parm1	0	0.957128	0	1.13244	0
Hist1h2be	0	0.956379	0	0.872439	0
Ifi205	0	0.95608	0	1.27828	0
Large1	0	0.954268	0	0.650137	0
Notch3	0	0.953745	0	1.34388	-1.21913
Rerg	0	0.953515	0	1.13136	-0.878156
P2ry14	0	0.953396	0	0.994091	-1.84439
Hyls1	0	0.952656	0	0.860925	-0.866398
Tlr8	0	0.95214	0	1.12557	0
Abi3bp	0	0.951116	0	1.18626	0
Snn	0	0.95092	0	0.711594	-1.31785
Ctss	0	0.949751	0	1.28125	0
Serpinb6a	0	0.949632	0	0.750718	-0.907566
Kif26b	0	0.949527	0	1.41201	0
H2-DMa	0	0.949088	0	1.04106	0
Il15	0	0.948153	0	0	-1.61521
Clec4n	0	0.948026	0	0.92608	-0.925647
Scn8a	0	0.947561	0	1.4859	0
Zfp429	0	0.947237	0	0.979043	-0.732628
Rnf145	0	0.946159	0	0.75208	-0.821263
Cdc42ep5	-0.662439	0.946146	-1.26478	2.21977	1.85174
Ptp4a3	0	0.945816	0	1.05639	-0.991097
Laptm5	0	0.945608	0	1.06588	0
Cr2	0	0.945126	0	1.19048	0
Cyp4f18	0	0.944307	0	1.63048	0
Neu3	0	0.944081	0	1.7885	0
Tuba1a	0	0.943936	0	1.00078	-1.61459
Tmem132a	0	0.9434	0	1.07129	-1.339
Kcnk1	0	0.943113	0	2.12624	0
Ifngr1	0	0.94188	0	0.886409	-1.33907
Rps6ka5	0	0.941618	0	0	0
Map4k1	0	0.940442	0	1.10294	-0.887971
Cyth3	0	0.94016	0	1.06351	-0.785178
Atp1b1	0	0.940032	0	0.751429	0
Zfp677	0	0.939566	0	1.19782	0
Fzd1	0	0.939504	0	0.868648	0
Tmem173	0	0.939041	0	1.2982	0
Mlph	0	0.93792	0	1.43147	0
Cdon	0	0.936581	0	1.08892	-0.596938
Ifit3	0	0.936462	0	1.04736	0
Cav1	0	0.935759	0	0	0
Cxcl9	0	0.935267	0	0.835058	0
Stap1	0	0.935029	0	1.20015	0
Gbp8	0	0.934565	0	0.81232	0
Sash3	0	0.934466	0	0.983775	-0.799847
Evi2a	0	0.934422	0	1.09459	-0.947725
Cdr2	0	0.933265	0	0	-1.7055
Nfkbie	0	0.932214	0	1.13527	0
Tmem159	0	0.932123	0	0.918552	-0.640593
Ripor3	0	0.930833	0	1.17302	-0.709015
Gdpd1	0	0.93077	0	0.825644	0
Olfm3	0	0.930581	0	1.01108	2.15712
Samd5	0	0.930316	0	0.931449	-1.19261
Cmpk2	0	0.930102	0	1.14656	0
Fbxw17	0	0.930032	0	0.828416	-0.997282
Mep1b	1.57054	0.929695	1.8236	0	0
Myo1f	0	0.929519	0	1.39203	0
Pmp22	0	0.929431	0	1.01994	-1.03031
Lrrc1	0	0.928717	0	0.903152	0
Rfc4	0	0.926922	0	0.858381	-0.876732
Obsl1	0	0.926852	0	1.35322	-1.38909
G2e3	0	0.92675	0	0.908453	-1.10176
Jun	0	0.926744	0	1.31941	0
Unc5a	0	0.925694	0	1.04953	0
Megf6	0	0.924946	0	0.901956	-1.5497
Akna	0	0.924923	0	1.10774	-0.691558
Sh3kbp1	0	0.924869	0	1.14112	-0.73944
Ly86	0	0.92357	0	1.09408	0
Coro1c	0	0.923118	0	0.773252	0
Adora1	0	0.922654	0	0.682488	-0.817211
Gas6	0	0.921846	-0.665572	1.56917	0.657885
P3h4	0	0.921632	0	1.10699	-1.20128
Ank2	0	0.921227	0	1.07086	-0.709784
Rab7b	0	0.921111	0	1.51036	0
Fam129b	0	0.920671	0	0	0
Hunk	0	0.91915	-0.804948	1.73909	0
Prelp	0	0.91899	0	1.04804	0
Dck	0	0.917959	0	0.763135	-0.876942
Axl	0	0.917079	0	0.943847	-0.61649
Selplg	0	0.916922	0	1.28603	0
Amot	0	0.915379	0	0.925234	-0.74908
Jcad	0	0.915012	0	0.830618	-1.04479
Pycard	0	0.914849	0	0	0
Tgfbi	0	0.914346	0	0.854589	-0.897415
Cdh3	0	0.913291	0	1.80202	0
Grid1	0	0.913241	0	0.878564	0
Spn	0	0.91272	0	1.21003	-0.748166
Osbpl5	0	0.912562	0	1.20616	0
Gpr35	0	0.91161	0	1.18973	0
Ninl	0	0.91161	0	1.59801	0
Cenpt	0	0.910526	0	1.30266	-0.941901
Smpd3	0	0.910272	0	1.00534	0.899358
Ets2	0	0.9093	0	0.892664	-0.71382
Dpysl2	0	0.909012	0	0.919064	0
Gbp2	0	0.90775	0	0	-0.839144
Piezo1	0	0.907026	0	0.994201	-0.597334
2025-09-08	0	0.906496	0	0.987592	0
Cuedc1	0	0.906413	0	1.1998	-0.704537
Slc37a2	0	0.905999	0	0.668794	-0.6435
Plek	0	0.905965	0	1.24317	0
Ier5	0	0.905205	0	1.23047	-0.705234
Armcx4	0	0.905051	0	1.25015	-2.34097
Raet1d	0	0.903875	0	1.25421	0.730531
Lipo3	0	0.903792	0	0.81787	-0.761249
Mxra7	0	0.903449	0	1.37737	0
Fgf21	0	0.902052	0	1.46085	0
Crtap	0	0.900072	0	1.1229	-1.00371
Galns	0	0.899954	0	1.03376	0
Hspg2	0	0.899647	0	0.861947	-1.37645
Fcer1g	0	0.898064	0	0.968379	0
Gbp6	0	0.897773	0	0	0
Slfn5	0	0.897701	0	0.932888	0
Afp	0.972524	0.897206	0.941783	0	-3.54813
Tubb6	0	0.896535	-0.745075	1.67074	-1.34807
Slc43a2	0	0.896193	0	0.70834	-0.881181
Cd200	0	0.895391	0	1.54214	-0.849652
Rarb	0	0.892979	0	0	-1.3575
Dzip3	0	0.892479	0	1.19812	0
Cd84	0	0.891624	0	1.05009	0
Gm33543	0	0.890688	0	0.656008	-1.7432
Cks1b	0	0.889974	0	0	-0.713052
Rnf180	0	0.88943	0	1.34717	0
Cotl1	0	0.889105	0	0.757098	-0.830165
Cyp2c38	0	0.888714	0	0.79083	3.06834
Pla2g7	0	0.888445	0	1.14187	0
Comtd1	0	0.888157	0	1.12553	0.625245
Cep128	0	0.888087	0	1.13285	-1.09336
H2-DMb1	0	0.887749	0	1.29791	0
Fyb	0	0.887381	0	1.11323	0
Itprip	0	0.887178	0	0	0
Dock7	0	0.886917	0	0.672658	-0.860517
Sass6	0	0.886626	0	0.985858	-1.31498
Mtnr1a	-0.96885	0.886556	-1.58988	2.41606	1.53514
Brca1	0	0.886482	0	1.09868	-1.61253
E2f1	0	0.88615	0	0.757665	0
Spry2	0	0.885848	0	1.07733	-1.2667
Nfkb2	0	0.885508	0	1.13979	0
Emilin1	0	0.884618	0	1.00423	-0.814447
Il17rd	0	0.884565	0	1.19698	0
Plcg2	0	0.884467	0	1.03292	-0.694837
Pik3cg	0	0.883517	0	1.08619	-0.816666
Epb41l2	0	0.883215	0	0.924293	-0.859334
Hsd17b13	0	0.882902	0	0.979108	0
Ppp1r9b	0	0.882586	0	0.936469	-0.590624
Lama4	0	0.882282	0	0.727702	-0.833417
Ms4a6c	0	0.882042	0	1.22356	-0.653695
Cenpq	0	0.880711	0	0.683573	-1.17058
Tonsl	0	0.880496	0	0	-1.10238
Stard9	0	0.879659	0	0.965272	-0.929643
Rhob	0	0.878386	0	0.995205	-0.613662
Scarf2	0	0.877531	0	1.30629	0
Prickle2	0	0.876308	0	1.07658	-0.672538
Rhoj	0	0.874055	0	1.11703	-0.677059
Hacd4	0	0.873683	0	0.891615	-0.814494
Mest	0	0.873554	0	0	-3.20232
Ttc3	0	0.872741	0	0.588204	-0.599268
Ppargc1a	0	0.872526	0	0.823145	0
Map3k13	0	0.87221	0	0.975392	0
Per3	1.49954	0.871351	1.94226	-1.14007	-0.638254
Ppfia4	0	0.869266	0	1.33534	0
Gas2	0	0.868633	0	0.92297	0.854997
Unc13d	0	0.868616	0	1.13037	0
Pik3r5	0	0.868194	0	1.22629	0
Tnip1	0	0.868079	0	1.14938	0
Fxyd5	0	0.86792	0	1.30187	0
Sspn	0	0.86743	0	1.16342	0
Osmr	0	0.867092	0	1.33753	0
Hist1h4m	0	0.866437	0	0.836585	0
Tox	0	0.862196	0	0	-1.53761
Alcam	0	0.862157	0	0.942499	0
Prkcb	0	0.861459	0	1.03009	0
Nin	0	0.861319	0	0.79683	-0.81922
Epsti1	0	0.860919	0	0.822175	-0.953725
Zfp518b	0	0.860653	0	1.0957	-0.723234
Shank2	0	0.860587	0	0	0
Krt8	0	0.860333	0	1.07433	0
Cdh1	0	0.859818	0	1.18482	-0.781143
Hlx	0	0.859376	0	1.05564	0
Fmnl3	0	0.858557	0	0.959649	-0.878995
Cd68	0	0.856298	0	1.0462	-0.7969
Pfkfb4	0	0.856197	0	1.0123	0
Lyve1	0	0.856195	0	0.805092	-1.59279
Akt3	0	0.855263	0	1.02294	-0.666538
Nabp1	0	0.855196	0	0.799841	0
Synm	0	0.854543	0	1.08678	0
Rttn	0	0.854509	0	0.908348	-0.644253
Atp8b4	0	0.854477	0	1.35765	1.39715
Abi2	0	0.853865	0	1.05589	-1.20388
Xrcc2	0	0.853616	0	0.769439	-1.22176
Topbp1	0	0.853033	0	0.599657	-0.849357
Cttnbp2nl	0	0.853004	0	1.10594	-0.60555
Arhgap18	0	0.852909	0	0.749351	0
Nampt	0	0.850094	0	0	0
Dock2	0	0.849941	0	1.1144	-0.801721
Plekhh2	0	0.849644	0	0.977056	-0.771216
Ppp1r18	0	0.849516	0	0.917645	-0.957012
Cdk5rap2	0	0.84925	0	0.703171	-0.745963
Nxn	0	0.848958	0	0	-1.06564
Mpzl1	0	0.848892	0	1.21136	-2.11967
Tcf7l1	0	0.848545	0	1.11738	0
Brip1	0	0.848398	0	0	-1.11681
Cyfip2	0	0.848265	0	1.02748	0
Slc48a1	0	0.848261	0	0.964635	0
Prkx	0	0.848156	0	1.18662	0
Tpm4	0	0.84775	0	0.988132	-0.990507
Rock2	0	0.8471	0	0.832788	0
Sod3	0	0.847049	0	0.801523	-0.971728
Dip2a	0	0.846968	0	0.82824	-0.715256
Ifrd1	0	0.846877	0	0.694421	-1.11349
Taf1d	0	0.846105	0	0	0
Clec4a2	0	0.845815	0	1.53335	0
C1qtnf7	0	0.845218	0	1.48636	-0.649386
Tmem47	0	0.842267	0	0.699669	-0.866848
Mthfd2	0	0.84199	0	1.72881	0
Frmd6	0	0.841354	0	1.11193	0
Ifi27l2a	0	0.840759	0	1.10828	-0.735188
Mmrn1	0	0.840621	0	1.23844	0
Zfp532	0	0.839679	0	1.14162	-1.20516
Rcan2	0	0.839646	0	0.807181	-0.712035
Pip4k2a	0	0.838932	0	1.06076	0
Zmat3	0	0.838896	0	1.17053	0
Hk2	0	0.838625	0	1.02629	0
Plekhg2	0	0.83807	0	0.938661	0
Tnfrsf11a	0	0.837767	0	1.02859	-0.622813
Tmsb4x	0	0.837216	0	0.727175	-0.671184
St3gal2	0	0.835406	0	0.794312	-1.13559
Usp2	1.2034	0.835145	1.40158	0	0.711779
Plekha1	0	0.834919	0	1.1238	0
Pir	0	0.834838	0	0.636326	0
Ifi204	0	0.83394	0	0.778831	-0.665916
Homer3	0	0.83389	0	1.0979	-1.23308
Lepr	0	0.831164	0	0.742262	-2.34362
Des	0	0.829784	0	0	-0.645849
Sorbs2	0	0.829647	0	1.0563	0
Ctps2	0	0.829373	0	0.867239	-0.926543
Gja1	0	0.829343	0	1.13633	0
Gstm1	0	0.82902	0	1.05339	0
Lyz2	0	0.828652	0	1.37154	0
Micu2	0	0.828525	0	0.767871	0
Maff	0	0.828479	0	0.750954	0
Pkp1	0	0.826709	-2.61784	3.43665	0
Lgals3bp	0	0.826598	0	0.825583	0
Ptprc	0	0.825859	0	1.00137	0
Ywhah	0	0.822779	0	0.952371	0
Treh	0	0.821178	0	0.790193	2.14762
Myzap	0	0.820488	0	0.680954	-1.01521
Fkbp1a	0	0.819387	0	0.946275	0
Fam129a	0	0.818921	0	0.853094	-0.743185
Neto2	0	0.817661	0	1.69351	0
Hps3	0	0.817379	0	0.691633	0
Naaa	0	0.816972	0	0.820546	-0.590296
Casp1	0	0.816137	0	0	0
Dcbld1	0	0.815332	0	0.819941	-1.0976
[truncated: 3,274 more rows]

## Sheet: SuppTable10B_Allosome.linked
Supplemental Table 10B: Allosome-linked Differentially Expressed Genes (DEGs) in comparisons of risk samples or LAAsP (Figure 7)
Cutoffs for DEGs are linear fold change exceeding 1.5 and adjusted p-value (FDR) < 0.05
Values are log2 fold change
HR = High risk Endotype 1, LR = Low risk Endotype 2
Gene	M_liver_5mo_TBT.over.VEH	M_liver_5mo_HR.over.VEH	M_liver_5mo_LR.over.VEH	M_liver_5mo_HR.over.LR	M liver LAAsP (3wk to 5mo)	Allosome
Ccdc120	0	1.61406	-1.42046	3.07543	-1.2645	X
Gpr34	0	1.60573	0	2.39176	0	X
Cybb	0	1.2516	0	1.37421	0	X
Plp2	0	1.25303	0	1.27779	-0.874355	X
Pqbp1	0	0	0	0	0.651549	X
Bcor	0	0	0	0	-0.624295	X
Shroom4	0	0	0	0	-0.933168	X
Praf2	0	0	0	0	0.846954	X
Rbm3	0	0	0	0	-1.21819	X
Magix	0	-0.6423	0	-0.776859	0	X
